# Supplementary material
Source: MDPI journal article supplement (https://www.mdpi.com/2225-1146/9/1/12)
Supplement: s1 [file s1]

# MONITORING COINTEGRATING POLYNOMIAL REGRESSIONS

## SUPPLEMENTARY APPENDIX E: CRITICAL VALUES

FABIAN KNORRE, MARTIN WAGNER AND MAXIMILIAN GRUPE

### Description

For the calculations of the critical values the functionals of Brownian motions have been approximated with the corresponding functions of random walks with 10,000 observations generated from i.i.d. standard normal variables. The number of replications in the simulations is 100,000. Tables S18 – S449 provide the critical values for the usual deterministic components, i. e. , an intercept only and intercept and linear trend, and up to four integrated regressors and consecutive powers of up to order three of one of the integrated regressors. Denote as in the main text, w.l.o.g.,  $x_{kt}$  as the I(1) regressor considered to enter the regression model with powers larger than one. Furthermore, the critical values are available for all considered detectors, FM-/D-OLS and IM-OLS estimation and significance levels of 0.01, 0.025, 0.05, 0.1. The weighting function  $g(s)$  is set to  $s^3$  and  $s^5$ , depending on the deterministic specification. Critical values are available for a fine grid of the calibration fraction  $m$  ranging from 0.1, 0.11,  $\dots$ , 0.9. For the moving window detectors, critical values are available for the window sizes equal to 10%, 20% and 30% of the sample size.

### Contents

|          |                                           |           |
|----------|-------------------------------------------|-----------|
| <b>1</b> | <b>Detector: <math>\hat{H}^m</math></b>   | <b>3</b>  |
| 1.1      | Number of I(1) regressors: 1 . . . . .    | 3         |
| 1.2      | Number of I(1) regressors: 2 . . . . .    | 15        |
| 1.3      | Number of I(1) regressors: 3 . . . . .    | 27        |
| 1.4      | Number of I(1) regressors: 4 . . . . .    | 39        |
| <b>2</b> | <b>Detector: <math>\hat{H}_d^m</math></b> | <b>51</b> |

|          |                                                      |            |
|----------|------------------------------------------------------|------------|
| 2.1      | Number of I(1) regressors: 1 . . . . .               | 51         |
| 2.2      | Number of I(1) regressors: 2 . . . . .               | 63         |
| 2.3      | Number of I(1) regressors: 3 . . . . .               | 75         |
| 2.4      | Number of I(1) regressors: 4 . . . . .               | 87         |
| <b>3</b> | <b>Detector: <math>\hat{H}_{sn}^m</math></b>         | <b>99</b>  |
| 3.1      | Number of I(1) regressors: 1 . . . . .               | 99         |
| 3.2      | Number of I(1) regressors: 2 . . . . .               | 111        |
| 3.3      | Number of I(1) regressors: 3 . . . . .               | 123        |
| 3.4      | Number of I(1) regressors: 4 . . . . .               | 135        |
| <b>4</b> | <b>Detector: <math>\hat{H}_{mov}^{m,n}</math></b>    | <b>147</b> |
| 4.1      | Number of I(1) regressors: 1 . . . . .               | 147        |
| 4.2      | Number of I(1) regressors: 2 . . . . .               | 183        |
| 4.3      | Number of I(1) regressors: 3 . . . . .               | 219        |
| 4.4      | Number of I(1) regressors: 4 . . . . .               | 255        |
| <b>5</b> | <b>Detector: <math>\hat{H}_{mov,sn}^{m,n}</math></b> | <b>291</b> |
| 5.1      | Number of I(1) regressors: 1 . . . . .               | 291        |
| 5.2      | Number of I(1) regressors: 2 . . . . .               | 327        |
| 5.3      | Number of I(1) regressors: 3 . . . . .               | 363        |
| 5.4      | Number of I(1) regressors: 4 . . . . .               | 399        |

# 1 Detector: $\hat{H}^m$

## 1.1 Number of I(1) regressors: 1

| m    | 90 %   | 95 %   | 97,5 % | 99 %   | m    | 90 % | 95 % | 97,5 % | 99 % |
|------|--------|--------|--------|--------|------|------|------|--------|------|
| 0.10 | 158.27 | 302.67 | 512.32 | 939.24 | 0.51 | 1.31 | 2.14 | 3.26   | 5.21 |
| 0.11 | 125.67 | 242.00 | 405.46 | 745.03 | 0.52 | 1.20 | 1.97 | 2.94   | 4.69 |
| 0.12 | 101.91 | 196.30 | 335.02 | 602.19 | 0.53 | 1.10 | 1.78 | 2.67   | 4.19 |
| 0.13 | 83.36  | 158.77 | 273.26 | 495.81 | 0.54 | 1.01 | 1.63 | 2.43   | 3.88 |
| 0.14 | 69.75  | 132.46 | 226.79 | 399.41 | 0.55 | 0.94 | 1.49 | 2.21   | 3.51 |
| 0.15 | 58.64  | 111.74 | 187.85 | 329.18 | 0.56 | 0.86 | 1.37 | 2.04   | 3.25 |
| 0.16 | 50.45  | 94.44  | 158.99 | 281.22 | 0.57 | 0.79 | 1.26 | 1.88   | 2.90 |
| 0.17 | 43.21  | 81.01  | 135.80 | 242.50 | 0.58 | 0.73 | 1.15 | 1.70   | 2.67 |
| 0.18 | 37.44  | 70.04  | 115.40 | 206.23 | 0.59 | 0.67 | 1.06 | 1.56   | 2.42 |
| 0.19 | 32.54  | 61.11  | 100.96 | 178.28 | 0.60 | 0.61 | 0.96 | 1.40   | 2.16 |
| 0.20 | 28.17  | 52.93  | 88.27  | 151.02 | 0.61 | 0.56 | 0.87 | 1.27   | 1.95 |
| 0.21 | 24.78  | 46.12  | 77.74  | 133.56 | 0.62 | 0.51 | 0.80 | 1.15   | 1.75 |
| 0.22 | 21.75  | 40.26  | 68.42  | 117.62 | 0.63 | 0.47 | 0.72 | 1.04   | 1.59 |
| 0.23 | 19.23  | 35.67  | 59.35  | 104.58 | 0.64 | 0.43 | 0.65 | 0.95   | 1.45 |
| 0.24 | 16.99  | 31.35  | 51.94  | 91.79  | 0.65 | 0.39 | 0.59 | 0.85   | 1.29 |
| 0.25 | 15.28  | 27.91  | 47.18  | 82.30  | 0.66 | 0.36 | 0.54 | 0.78   | 1.17 |
| 0.26 | 13.65  | 25.08  | 41.66  | 71.96  | 0.67 | 0.32 | 0.49 | 0.69   | 1.04 |
| 0.27 | 12.19  | 22.35  | 37.21  | 63.31  | 0.68 | 0.30 | 0.45 | 0.63   | 0.94 |
| 0.28 | 11.00  | 19.88  | 32.89  | 56.34  | 0.69 | 0.27 | 0.40 | 0.56   | 0.84 |
| 0.29 | 9.86   | 17.96  | 29.28  | 50.61  | 0.70 | 0.24 | 0.36 | 0.51   | 0.74 |
| 0.30 | 8.89   | 16.03  | 26.03  | 44.89  | 0.71 | 0.22 | 0.33 | 0.45   | 0.66 |
| 0.31 | 8.04   | 14.47  | 23.65  | 41.35  | 0.72 | 0.20 | 0.29 | 0.41   | 0.59 |
| 0.32 | 7.23   | 13.12  | 21.22  | 37.22  | 0.73 | 0.18 | 0.27 | 0.36   | 0.52 |
| 0.33 | 6.56   | 11.76  | 19.22  | 33.32  | 0.74 | 0.16 | 0.24 | 0.33   | 0.46 |
| 0.34 | 5.96   | 10.64  | 17.36  | 30.51  | 0.75 | 0.14 | 0.21 | 0.29   | 0.41 |
| 0.35 | 5.42   | 9.57   | 15.54  | 26.49  | 0.76 | 0.13 | 0.19 | 0.26   | 0.37 |
| 0.36 | 4.95   | 8.72   | 13.99  | 24.19  | 0.77 | 0.12 | 0.17 | 0.23   | 0.32 |
| 0.37 | 4.49   | 7.92   | 12.70  | 21.53  | 0.78 | 0.10 | 0.15 | 0.20   | 0.28 |
| 0.38 | 4.08   | 7.05   | 11.43  | 19.44  | 0.79 | 0.09 | 0.13 | 0.17   | 0.25 |
| 0.39 | 3.68   | 6.38   | 10.27  | 17.55  | 0.80 | 0.08 | 0.12 | 0.15   | 0.21 |
| 0.40 | 3.38   | 5.76   | 9.28   | 15.62  | 0.81 | 0.07 | 0.10 | 0.14   | 0.19 |
| 0.41 | 3.09   | 5.27   | 8.32   | 13.93  | 0.82 | 0.06 | 0.09 | 0.12   | 0.16 |
| 0.42 | 2.82   | 4.82   | 7.61   | 12.51  | 0.83 | 0.05 | 0.08 | 0.10   | 0.14 |
| 0.43 | 2.59   | 4.39   | 6.93   | 11.42  | 0.84 | 0.05 | 0.07 | 0.09   | 0.12 |
| 0.44 | 2.39   | 4.02   | 6.24   | 10.30  | 0.85 | 0.04 | 0.06 | 0.07   | 0.10 |
| 0.45 | 2.19   | 3.66   | 5.74   | 9.51   | 0.86 | 0.03 | 0.05 | 0.06   | 0.08 |
| 0.46 | 2.00   | 3.34   | 5.17   | 8.69   | 0.87 | 0.03 | 0.04 | 0.05   | 0.07 |
| 0.47 | 1.83   | 3.08   | 4.73   | 7.80   | 0.88 | 0.02 | 0.03 | 0.04   | 0.06 |
| 0.48 | 1.69   | 2.80   | 4.33   | 7.02   | 0.89 | 0.02 | 0.03 | 0.03   | 0.05 |
| 0.49 | 1.55   | 2.57   | 3.93   | 6.30   | 0.90 | 0.02 | 0.02 | 0.03   | 0.04 |
| 0.50 | 1.42   | 2.35   | 3.62   | 5.85   |      |      |      |        |      |

Table S18: Critical values for detector  $\hat{H}^m$  and FM-OLS and D-OLS estimation in a model with intercept. The number of integrated regressors is 1 and the highest power of  $x_{kt}$  is 1.

| m    | 90 %   | 95 %   | 97,5 %  | 99 %    | m    | 90 % | 95 % | 97,5 % | 99 %  |
|------|--------|--------|---------|---------|------|------|------|--------|-------|
| 0.10 | 304.29 | 628.29 | 1150.71 | 2176.57 | 0.51 | 2.52 | 4.51 | 7.45   | 13.36 |
| 0.11 | 244.91 | 503.68 | 915.52  | 1742.90 | 0.52 | 2.32 | 4.13 | 6.77   | 12.10 |
| 0.12 | 197.68 | 408.65 | 737.35  | 1432.02 | 0.53 | 2.13 | 3.77 | 6.17   | 10.94 |
| 0.13 | 163.87 | 329.85 | 598.77  | 1193.73 | 0.54 | 1.95 | 3.43 | 5.65   | 9.86  |
| 0.14 | 135.65 | 277.12 | 497.63  | 993.74  | 0.55 | 1.79 | 3.15 | 5.13   | 8.91  |
| 0.15 | 113.48 | 232.59 | 423.71  | 819.48  | 0.56 | 1.65 | 2.87 | 4.67   | 8.16  |
| 0.16 | 97.11  | 197.31 | 351.46  | 683.55  | 0.57 | 1.52 | 2.62 | 4.23   | 7.32  |
| 0.17 | 83.19  | 166.31 | 301.41  | 597.13  | 0.58 | 1.40 | 2.39 | 3.86   | 6.70  |
| 0.18 | 72.14  | 145.49 | 260.47  | 509.63  | 0.59 | 1.29 | 2.19 | 3.52   | 6.13  |
| 0.19 | 63.10  | 125.72 | 228.17  | 430.51  | 0.60 | 1.19 | 2.00 | 3.20   | 5.53  |
| 0.20 | 54.49  | 110.08 | 197.07  | 381.82  | 0.61 | 1.09 | 1.84 | 2.91   | 5.00  |
| 0.21 | 48.13  | 96.02  | 174.23  | 333.40  | 0.62 | 1.00 | 1.68 | 2.65   | 4.52  |
| 0.22 | 42.44  | 85.74  | 154.23  | 289.50  | 0.63 | 0.92 | 1.53 | 2.41   | 4.07  |
| 0.23 | 37.22  | 75.05  | 134.06  | 251.88  | 0.64 | 0.85 | 1.40 | 2.21   | 3.66  |
| 0.24 | 32.88  | 65.89  | 117.77  | 222.93  | 0.65 | 0.78 | 1.28 | 1.99   | 3.33  |
| 0.25 | 29.15  | 58.06  | 102.92  | 200.73  | 0.66 | 0.72 | 1.17 | 1.80   | 2.98  |
| 0.26 | 26.09  | 51.75  | 92.20   | 178.66  | 0.67 | 0.66 | 1.06 | 1.63   | 2.68  |
| 0.27 | 23.40  | 46.22  | 82.57   | 155.42  | 0.68 | 0.60 | 0.96 | 1.48   | 2.41  |
| 0.28 | 21.10  | 41.87  | 73.43   | 141.00  | 0.69 | 0.55 | 0.88 | 1.33   | 2.15  |
| 0.29 | 19.11  | 37.38  | 65.28   | 126.33  | 0.70 | 0.50 | 0.80 | 1.19   | 1.94  |
| 0.30 | 17.16  | 33.94  | 58.18   | 111.58  | 0.71 | 0.46 | 0.72 | 1.08   | 1.75  |
| 0.31 | 15.46  | 30.34  | 51.95   | 100.38  | 0.72 | 0.42 | 0.66 | 0.97   | 1.56  |
| 0.32 | 14.07  | 27.39  | 46.88   | 88.95   | 0.73 | 0.38 | 0.59 | 0.87   | 1.40  |
| 0.33 | 12.72  | 24.62  | 42.44   | 79.62   | 0.74 | 0.34 | 0.54 | 0.79   | 1.25  |
| 0.34 | 11.43  | 22.12  | 38.18   | 71.37   | 0.75 | 0.31 | 0.49 | 0.71   | 1.12  |
| 0.35 | 10.42  | 20.06  | 34.15   | 64.67   | 0.76 | 0.28 | 0.44 | 0.64   | 1.00  |
| 0.36 | 9.51   | 18.11  | 31.25   | 58.63   | 0.77 | 0.26 | 0.39 | 0.57   | 0.88  |
| 0.37 | 8.71   | 16.42  | 28.28   | 53.09   | 0.78 | 0.23 | 0.35 | 0.51   | 0.78  |
| 0.38 | 7.88   | 14.89  | 25.66   | 47.79   | 0.79 | 0.21 | 0.32 | 0.46   | 0.69  |
| 0.39 | 7.14   | 13.52  | 23.19   | 43.11   | 0.80 | 0.19 | 0.29 | 0.41   | 0.61  |
| 0.40 | 6.52   | 12.29  | 21.27   | 38.78   | 0.81 | 0.17 | 0.25 | 0.36   | 0.54  |
| 0.41 | 5.94   | 11.16  | 19.36   | 34.37   | 0.82 | 0.15 | 0.23 | 0.32   | 0.48  |
| 0.42 | 5.43   | 10.15  | 17.42   | 31.28   | 0.83 | 0.13 | 0.20 | 0.28   | 0.42  |
| 0.43 | 4.98   | 9.29   | 15.69   | 29.01   | 0.84 | 0.12 | 0.18 | 0.25   | 0.36  |
| 0.44 | 4.58   | 8.46   | 14.29   | 26.07   | 0.85 | 0.10 | 0.16 | 0.22   | 0.32  |
| 0.45 | 4.20   | 7.72   | 13.03   | 23.73   | 0.86 | 0.09 | 0.14 | 0.19   | 0.28  |
| 0.46 | 3.83   | 7.08   | 11.83   | 21.56   | 0.87 | 0.08 | 0.12 | 0.16   | 0.24  |
| 0.47 | 3.52   | 6.42   | 10.75   | 19.45   | 0.88 | 0.07 | 0.10 | 0.14   | 0.20  |
| 0.48 | 3.23   | 5.86   | 9.73    | 17.91   | 0.89 | 0.06 | 0.09 | 0.12   | 0.17  |
| 0.49 | 2.99   | 5.35   | 8.89    | 16.42   | 0.90 | 0.05 | 0.07 | 0.10   | 0.15  |
| 0.50 | 2.74   | 4.92   | 8.18    | 14.85   |      |      |      |        |       |

Table S19: Critical values for detector  $\hat{H}^m$  and IM-OLS estimation in a model with intercept. The number of integrated regressors is 1 and the highest power of  $x_{kt}$  is 1.

| m    | 90 %    | 95 %    | 97,5 %  | 99 %     | m    | 90 % | 95 % | 97,5 % | 99 %  |
|------|---------|---------|---------|----------|------|------|------|--------|-------|
| 0.10 | 3316.59 | 5418.80 | 8431.78 | 13581.34 | 0.51 | 4.44 | 6.87 | 10.10  | 15.70 |
| 0.11 | 2370.83 | 3913.17 | 6037.90 | 9867.96  | 0.52 | 3.97 | 6.13 | 8.98   | 13.76 |
| 0.12 | 1760.24 | 2880.21 | 4434.87 | 7169.89  | 0.53 | 3.51 | 5.46 | 8.03   | 12.41 |
| 0.13 | 1333.11 | 2189.13 | 3374.95 | 5434.45  | 0.54 | 3.14 | 4.88 | 7.10   | 10.83 |
| 0.14 | 1020.58 | 1705.23 | 2585.40 | 4212.13  | 0.55 | 2.84 | 4.35 | 6.30   | 9.66  |
| 0.15 | 810.60  | 1324.00 | 2068.79 | 3313.67  | 0.56 | 2.55 | 3.88 | 5.61   | 8.53  |
| 0.16 | 640.56  | 1054.37 | 1613.44 | 2588.06  | 0.57 | 2.28 | 3.47 | 4.94   | 7.48  |
| 0.17 | 520.15  | 847.76  | 1296.21 | 2127.44  | 0.58 | 2.03 | 3.11 | 4.41   | 6.75  |
| 0.18 | 413.60  | 686.31  | 1049.24 | 1734.76  | 0.59 | 1.82 | 2.77 | 3.93   | 5.96  |
| 0.19 | 342.36  | 557.97  | 853.15  | 1405.60  | 0.60 | 1.61 | 2.45 | 3.47   | 5.29  |
| 0.20 | 281.97  | 459.13  | 706.88  | 1156.27  | 0.61 | 1.43 | 2.17 | 3.06   | 4.62  |
| 0.21 | 236.90  | 381.39  | 584.96  | 941.33   | 0.62 | 1.27 | 1.93 | 2.73   | 4.07  |
| 0.22 | 197.53  | 319.96  | 492.70  | 796.61   | 0.63 | 1.13 | 1.71 | 2.42   | 3.59  |
| 0.23 | 168.57  | 271.59  | 416.49  | 672.66   | 0.64 | 1.01 | 1.52 | 2.13   | 3.12  |
| 0.24 | 141.09  | 228.83  | 347.13  | 564.29   | 0.65 | 0.89 | 1.34 | 1.87   | 2.77  |
| 0.25 | 120.97  | 197.35  | 295.98  | 475.06   | 0.66 | 0.80 | 1.19 | 1.65   | 2.43  |
| 0.26 | 103.50  | 166.89  | 252.84  | 404.10   | 0.67 | 0.71 | 1.06 | 1.48   | 2.16  |
| 0.27 | 89.00   | 143.47  | 215.53  | 349.74   | 0.68 | 0.63 | 0.94 | 1.31   | 1.87  |
| 0.28 | 76.57   | 124.15  | 186.34  | 297.06   | 0.69 | 0.56 | 0.84 | 1.16   | 1.67  |
| 0.29 | 66.41   | 107.86  | 163.54  | 257.79   | 0.70 | 0.49 | 0.73 | 1.01   | 1.44  |
| 0.30 | 57.72   | 93.57   | 140.26  | 220.08   | 0.71 | 0.43 | 0.65 | 0.89   | 1.27  |
| 0.31 | 50.18   | 81.28   | 124.29  | 194.50   | 0.72 | 0.39 | 0.56 | 0.78   | 1.12  |
| 0.32 | 44.05   | 70.69   | 107.06  | 169.44   | 0.73 | 0.34 | 0.50 | 0.67   | 0.97  |
| 0.33 | 38.33   | 61.78   | 92.40   | 147.04   | 0.74 | 0.30 | 0.43 | 0.59   | 0.84  |
| 0.34 | 33.54   | 53.98   | 80.24   | 129.12   | 0.75 | 0.26 | 0.38 | 0.51   | 0.73  |
| 0.35 | 29.44   | 47.39   | 70.57   | 115.02   | 0.76 | 0.23 | 0.33 | 0.45   | 0.63  |
| 0.36 | 25.98   | 41.55   | 61.93   | 100.01   | 0.77 | 0.20 | 0.29 | 0.39   | 0.55  |
| 0.37 | 22.86   | 36.44   | 54.01   | 86.73    | 0.78 | 0.17 | 0.25 | 0.33   | 0.47  |
| 0.38 | 20.23   | 32.14   | 48.27   | 75.77    | 0.79 | 0.15 | 0.21 | 0.28   | 0.40  |
| 0.39 | 18.02   | 28.28   | 42.37   | 67.19    | 0.80 | 0.13 | 0.18 | 0.24   | 0.34  |
| 0.40 | 15.83   | 25.05   | 37.27   | 58.98    | 0.81 | 0.11 | 0.16 | 0.21   | 0.29  |
| 0.41 | 14.00   | 22.33   | 33.00   | 51.69    | 0.82 | 0.09 | 0.13 | 0.18   | 0.24  |
| 0.42 | 12.44   | 19.74   | 29.35   | 45.93    | 0.83 | 0.08 | 0.11 | 0.15   | 0.20  |
| 0.43 | 11.11   | 17.52   | 26.04   | 40.62    | 0.84 | 0.07 | 0.09 | 0.13   | 0.17  |
| 0.44 | 9.96    | 15.69   | 23.32   | 35.59    | 0.85 | 0.05 | 0.08 | 0.10   | 0.14  |
| 0.45 | 8.83    | 13.90   | 20.46   | 32.00    | 0.86 | 0.05 | 0.06 | 0.09   | 0.11  |
| 0.46 | 7.86    | 12.30   | 18.02   | 28.01    | 0.87 | 0.04 | 0.05 | 0.07   | 0.09  |
| 0.47 | 6.97    | 10.97   | 16.20   | 25.55    | 0.88 | 0.03 | 0.04 | 0.06   | 0.07  |
| 0.48 | 6.22    | 9.68    | 14.32   | 22.22    | 0.89 | 0.02 | 0.03 | 0.04   | 0.06  |
| 0.49 | 5.56    | 8.59    | 12.65   | 19.64    | 0.90 | 0.02 | 0.03 | 0.04   | 0.05  |
| 0.50 | 4.99    | 7.75    | 11.15   | 17.42    |      |      |      |        |       |

Table S20: Critical values for detector  $\hat{H}^m$  and FM-OLS and D-OLS estimation in a model with intercept and linear trend. The number of integrated regressors is 1 and the highest power of  $x_{kt}$  is 1.

| m    | 90 %    | 95 %     | 97,5 %   | 99 %     | m    | 90 % | 95 %  | 97,5 % | 99 %  |
|------|---------|----------|----------|----------|------|------|-------|--------|-------|
| 0.10 | 5800.31 | 10153.49 | 16587.76 | 28779.00 | 0.51 | 7.83 | 12.96 | 20.45  | 33.96 |
| 0.11 | 4164.75 | 7420.81  | 12040.35 | 20976.67 | 0.52 | 7.03 | 11.58 | 18.08  | 29.68 |
| 0.12 | 3075.41 | 5444.28  | 8909.52  | 15596.56 | 0.53 | 6.28 | 10.37 | 15.94  | 26.24 |
| 0.13 | 2301.00 | 4092.61  | 6804.05  | 11634.82 | 0.54 | 5.61 | 9.24  | 14.10  | 23.38 |
| 0.14 | 1785.68 | 3186.71  | 5154.33  | 8923.56  | 0.55 | 5.00 | 8.23  | 12.64  | 20.96 |
| 0.15 | 1415.90 | 2472.56  | 4005.02  | 6982.82  | 0.56 | 4.46 | 7.35  | 11.27  | 18.68 |
| 0.16 | 1123.76 | 1981.27  | 3212.72  | 5485.91  | 0.57 | 4.01 | 6.55  | 10.13  | 16.65 |
| 0.17 | 894.40  | 1582.36  | 2571.99  | 4460.88  | 0.58 | 3.59 | 5.84  | 9.02   | 14.87 |
| 0.18 | 727.90  | 1292.23  | 2119.02  | 3655.25  | 0.59 | 3.23 | 5.24  | 8.01   | 13.08 |
| 0.19 | 599.21  | 1057.08  | 1721.19  | 3030.20  | 0.60 | 2.90 | 4.68  | 7.12   | 11.70 |
| 0.20 | 491.91  | 873.18   | 1436.64  | 2473.47  | 0.61 | 2.59 | 4.16  | 6.32   | 10.38 |
| 0.21 | 411.84  | 721.82   | 1191.88  | 2043.81  | 0.62 | 2.32 | 3.70  | 5.56   | 9.29  |
| 0.22 | 346.83  | 605.00   | 986.79   | 1708.42  | 0.63 | 2.06 | 3.29  | 4.93   | 8.24  |
| 0.23 | 292.75  | 510.94   | 828.10   | 1410.48  | 0.64 | 1.85 | 2.92  | 4.38   | 7.19  |
| 0.24 | 247.52  | 430.89   | 688.26   | 1186.91  | 0.65 | 1.65 | 2.60  | 3.90   | 6.30  |
| 0.25 | 210.78  | 363.93   | 582.43   | 1019.18  | 0.66 | 1.48 | 2.31  | 3.44   | 5.49  |
| 0.26 | 179.66  | 310.80   | 493.57   | 866.28   | 0.67 | 1.32 | 2.04  | 3.02   | 4.83  |
| 0.27 | 154.12  | 265.74   | 422.72   | 729.73   | 0.68 | 1.17 | 1.82  | 2.69   | 4.23  |
| 0.28 | 132.99  | 228.24   | 370.27   | 631.42   | 0.69 | 1.05 | 1.62  | 2.37   | 3.75  |
| 0.29 | 114.87  | 197.63   | 319.32   | 558.57   | 0.70 | 0.93 | 1.44  | 2.10   | 3.26  |
| 0.30 | 99.62   | 171.87   | 278.69   | 481.48   | 0.71 | 0.83 | 1.27  | 1.84   | 2.86  |
| 0.31 | 86.53   | 149.99   | 242.45   | 419.22   | 0.72 | 0.73 | 1.13  | 1.62   | 2.50  |
| 0.32 | 76.11   | 130.65   | 209.49   | 360.95   | 0.73 | 0.65 | 0.99  | 1.42   | 2.19  |
| 0.33 | 66.69   | 113.94   | 183.00   | 310.77   | 0.74 | 0.57 | 0.87  | 1.26   | 1.91  |
| 0.34 | 58.42   | 99.74    | 157.52   | 271.97   | 0.75 | 0.50 | 0.77  | 1.09   | 1.66  |
| 0.35 | 51.40   | 86.97    | 138.80   | 238.28   | 0.76 | 0.45 | 0.67  | 0.96   | 1.43  |
| 0.36 | 45.30   | 76.53    | 121.84   | 205.27   | 0.77 | 0.39 | 0.59  | 0.83   | 1.24  |
| 0.37 | 39.97   | 67.67    | 107.20   | 182.04   | 0.78 | 0.34 | 0.52  | 0.72   | 1.08  |
| 0.38 | 35.16   | 59.81    | 94.62    | 161.79   | 0.79 | 0.30 | 0.45  | 0.63   | 0.92  |
| 0.39 | 31.27   | 52.65    | 83.82    | 143.37   | 0.80 | 0.26 | 0.39  | 0.55   | 0.80  |
| 0.40 | 27.79   | 46.91    | 72.88    | 124.43   | 0.81 | 0.23 | 0.34  | 0.47   | 0.69  |
| 0.41 | 24.68   | 41.44    | 64.73    | 108.76   | 0.82 | 0.20 | 0.29  | 0.41   | 0.59  |
| 0.42 | 21.93   | 36.75    | 57.39    | 96.58    | 0.83 | 0.17 | 0.25  | 0.35   | 0.50  |
| 0.43 | 19.57   | 32.89    | 51.18    | 86.30    | 0.84 | 0.15 | 0.22  | 0.30   | 0.43  |
| 0.44 | 17.40   | 29.32    | 45.46    | 76.42    | 0.85 | 0.13 | 0.19  | 0.25   | 0.36  |
| 0.45 | 15.47   | 26.15    | 41.05    | 67.72    | 0.86 | 0.11 | 0.16  | 0.22   | 0.30  |
| 0.46 | 13.77   | 23.17    | 36.36    | 59.98    | 0.87 | 0.09 | 0.13  | 0.18   | 0.25  |
| 0.47 | 12.32   | 20.76    | 32.42    | 54.24    | 0.88 | 0.08 | 0.11  | 0.15   | 0.21  |
| 0.48 | 10.97   | 18.47    | 29.13    | 48.51    | 0.89 | 0.06 | 0.09  | 0.13   | 0.17  |
| 0.49 | 9.82    | 16.36    | 25.79    | 43.18    | 0.90 | 0.05 | 0.08  | 0.10   | 0.14  |
| 0.50 | 8.76    | 14.58    | 22.85    | 38.11    |      |      |       |        |       |

Table S21: Critical values for detector  $\hat{H}^m$  and IM-OLS estimation in a model with intercept and linear trend. The number of integrated regressors is 1 and the highest power of  $x_{kt}$  is 1.

| m    | 90 %     | 95 %     | 97,5 %   | 99 %      | m    | 90 % | 95 %  | 97,5 % | 99 %  |
|------|----------|----------|----------|-----------|------|------|-------|--------|-------|
| 0.10 | 12206.19 | 32259.69 | 73320.64 | 177296.89 | 0.51 | 8.23 | 20.37 | 41.97  | 97.87 |
| 0.11 | 8708.36  | 23277.69 | 53349.51 | 128114.63 | 0.52 | 7.14 | 17.69 | 36.63  | 83.38 |
| 0.12 | 6462.26  | 17247.34 | 38910.80 | 96271.02  | 0.53 | 6.25 | 15.25 | 31.39  | 72.25 |
| 0.13 | 4799.38  | 12655.27 | 28646.63 | 70949.04  | 0.54 | 5.51 | 13.31 | 27.64  | 62.59 |
| 0.14 | 3657.74  | 9641.48  | 21501.54 | 54198.31  | 0.55 | 4.81 | 11.65 | 24.31  | 53.90 |
| 0.15 | 2820.45  | 7477.37  | 16848.31 | 40869.16  | 0.56 | 4.24 | 10.19 | 20.84  | 46.94 |
| 0.16 | 2223.18  | 5894.83  | 13085.35 | 31886.70  | 0.57 | 3.70 | 9.01  | 18.36  | 40.99 |
| 0.17 | 1753.22  | 4629.97  | 10093.19 | 24376.30  | 0.58 | 3.21 | 7.72  | 15.98  | 35.88 |
| 0.18 | 1431.27  | 3736.48  | 8170.60  | 19062.78  | 0.59 | 2.81 | 6.80  | 13.62  | 31.43 |
| 0.19 | 1137.83  | 3042.98  | 6668.47  | 15745.29  | 0.60 | 2.48 | 5.87  | 12.02  | 27.04 |
| 0.20 | 923.12   | 2453.54  | 5383.67  | 12856.50  | 0.61 | 2.18 | 5.04  | 10.25  | 23.15 |
| 0.21 | 742.68   | 1978.23  | 4429.96  | 10832.92  | 0.62 | 1.89 | 4.33  | 8.73   | 19.99 |
| 0.22 | 622.17   | 1621.47  | 3640.60  | 8858.16   | 0.63 | 1.64 | 3.72  | 7.71   | 17.10 |
| 0.23 | 511.74   | 1362.58  | 3037.80  | 7244.30   | 0.64 | 1.41 | 3.23  | 6.51   | 14.17 |
| 0.24 | 429.98   | 1138.51  | 2530.63  | 6122.72   | 0.65 | 1.24 | 2.78  | 5.65   | 12.24 |
| 0.25 | 357.99   | 957.49   | 2130.88  | 5136.91   | 0.66 | 1.07 | 2.38  | 4.76   | 10.22 |
| 0.26 | 304.35   | 787.78   | 1773.80  | 4278.08   | 0.67 | 0.92 | 2.04  | 4.03   | 8.40  |
| 0.27 | 260.97   | 661.68   | 1474.92  | 3572.08   | 0.68 | 0.81 | 1.76  | 3.42   | 7.08  |
| 0.28 | 221.40   | 562.66   | 1245.64  | 3023.05   | 0.69 | 0.69 | 1.50  | 2.91   | 6.02  |
| 0.29 | 188.18   | 481.71   | 1056.65  | 2524.60   | 0.70 | 0.60 | 1.31  | 2.48   | 4.97  |
| 0.30 | 160.25   | 411.97   | 896.82   | 2154.05   | 0.71 | 0.52 | 1.10  | 2.08   | 4.27  |
| 0.31 | 135.68   | 354.54   | 776.85   | 1853.77   | 0.72 | 0.46 | 0.94  | 1.76   | 3.61  |
| 0.32 | 116.26   | 299.45   | 652.27   | 1588.06   | 0.73 | 0.40 | 0.80  | 1.52   | 3.05  |
| 0.33 | 99.32    | 257.99   | 553.54   | 1333.41   | 0.74 | 0.34 | 0.69  | 1.29   | 2.57  |
| 0.34 | 85.46    | 220.29   | 490.52   | 1169.23   | 0.75 | 0.29 | 0.57  | 1.09   | 2.12  |
| 0.35 | 73.45    | 187.29   | 410.66   | 990.10    | 0.76 | 0.25 | 0.49  | 0.90   | 1.81  |
| 0.36 | 64.12    | 161.71   | 353.94   | 828.39    | 0.77 | 0.22 | 0.41  | 0.76   | 1.52  |
| 0.37 | 55.09    | 141.73   | 304.15   | 729.43    | 0.78 | 0.19 | 0.35  | 0.62   | 1.24  |
| 0.38 | 47.50    | 123.73   | 262.81   | 628.46    | 0.79 | 0.16 | 0.29  | 0.51   | 0.98  |
| 0.39 | 41.70    | 106.34   | 227.13   | 540.78    | 0.80 | 0.14 | 0.24  | 0.42   | 0.80  |
| 0.40 | 35.84    | 93.11    | 197.30   | 463.87    | 0.81 | 0.12 | 0.20  | 0.35   | 0.65  |
| 0.41 | 31.29    | 80.12    | 170.88   | 400.04    | 0.82 | 0.10 | 0.17  | 0.29   | 0.52  |
| 0.42 | 27.49    | 70.44    | 151.54   | 347.97    | 0.83 | 0.08 | 0.14  | 0.23   | 0.41  |
| 0.43 | 24.01    | 60.80    | 130.10   | 295.79    | 0.84 | 0.07 | 0.11  | 0.18   | 0.33  |
| 0.44 | 20.81    | 52.28    | 113.85   | 262.50    | 0.85 | 0.06 | 0.09  | 0.14   | 0.26  |
| 0.45 | 18.41    | 45.74    | 97.91    | 228.91    | 0.86 | 0.05 | 0.07  | 0.12   | 0.19  |
| 0.46 | 15.96    | 40.01    | 87.45    | 198.16    | 0.87 | 0.04 | 0.06  | 0.09   | 0.15  |
| 0.47 | 13.96    | 35.12    | 75.33    | 171.30    | 0.88 | 0.03 | 0.05  | 0.07   | 0.12  |
| 0.48 | 12.28    | 30.48    | 65.00    | 148.87    | 0.89 | 0.02 | 0.04  | 0.06   | 0.09  |
| 0.49 | 10.83    | 26.85    | 57.00    | 130.42    | 0.90 | 0.02 | 0.03  | 0.04   | 0.07  |
| 0.50 | 9.34     | 23.13    | 48.85    | 113.32    |      |      |       |        |       |

Table S22: Critical values for detector  $\hat{H}^m$  and FM-OLS and D-OLS estimation in a model with intercept. The number of integrated regressors is 1 and the highest power of  $x_{kt}$  is 2.

| m    | 90 %     | 95 %      | 97,5 %    | 99 %      | m    | 90 %  | 95 %  | 97,5 % | 99 %   |
|------|----------|-----------|-----------|-----------|------|-------|-------|--------|--------|
| 0.10 | 39932.26 | 115862.41 | 298731.56 | 809403.06 | 0.51 | 25.52 | 70.58 | 166.87 | 425.86 |
| 0.11 | 28315.28 | 83273.73  | 208533.32 | 602034.81 | 0.52 | 22.20 | 61.30 | 146.08 | 381.67 |
| 0.12 | 20794.91 | 62460.00  | 151226.91 | 437263.19 | 0.53 | 19.24 | 53.26 | 124.97 | 328.89 |
| 0.13 | 15711.01 | 45899.37  | 116606.39 | 315702.32 | 0.54 | 16.79 | 45.74 | 109.90 | 286.98 |
| 0.14 | 11956.48 | 35352.13  | 85276.10  | 235176.24 | 0.55 | 14.77 | 39.86 | 93.56  | 248.89 |
| 0.15 | 9320.75  | 27213.94  | 67104.12  | 176594.99 | 0.56 | 12.85 | 34.59 | 81.41  | 214.12 |
| 0.16 | 7293.47  | 21112.72  | 52659.48  | 141822.24 | 0.57 | 11.25 | 29.94 | 70.63  | 189.61 |
| 0.17 | 5803.87  | 16642.68  | 40963.81  | 113703.44 | 0.58 | 9.74  | 26.47 | 61.25  | 163.88 |
| 0.18 | 4646.84  | 13531.02  | 32483.43  | 90572.50  | 0.59 | 8.55  | 23.08 | 52.99  | 141.16 |
| 0.19 | 3741.04  | 10973.35  | 25491.86  | 72824.38  | 0.60 | 7.48  | 20.18 | 45.78  | 122.75 |
| 0.20 | 3021.11  | 8781.12   | 21465.13  | 59970.81  | 0.61 | 6.51  | 17.68 | 39.79  | 104.31 |
| 0.21 | 2476.78  | 7255.94   | 17701.11  | 49073.66  | 0.62 | 5.71  | 15.34 | 34.39  | 90.93  |
| 0.22 | 2062.16  | 5932.31   | 14464.12  | 40798.05  | 0.63 | 5.01  | 13.23 | 29.62  | 78.26  |
| 0.23 | 1754.36  | 4993.47   | 12136.90  | 33462.83  | 0.64 | 4.34  | 11.45 | 25.43  | 66.49  |
| 0.24 | 1462.70  | 4122.20   | 9923.65   | 27536.39  | 0.65 | 3.75  | 9.87  | 22.06  | 56.27  |
| 0.25 | 1200.63  | 3439.24   | 8413.49   | 23459.44  | 0.66 | 3.23  | 8.51  | 18.76  | 47.68  |
| 0.26 | 1010.26  | 2957.21   | 7106.53   | 20145.20  | 0.67 | 2.78  | 7.35  | 15.90  | 40.85  |
| 0.27 | 856.43   | 2440.77   | 5871.38   | 16482.31  | 0.68 | 2.43  | 6.18  | 13.50  | 34.00  |
| 0.28 | 713.57   | 2040.64   | 5055.17   | 13935.63  | 0.69 | 2.10  | 5.26  | 11.57  | 27.56  |
| 0.29 | 608.70   | 1737.75   | 4241.13   | 11457.19  | 0.70 | 1.81  | 4.50  | 9.75   | 23.31  |
| 0.30 | 514.97   | 1495.05   | 3637.25   | 9535.77   | 0.71 | 1.55  | 3.83  | 8.18   | 19.65  |
| 0.31 | 443.45   | 1275.37   | 3084.40   | 8254.11   | 0.72 | 1.34  | 3.27  | 6.89   | 16.25  |
| 0.32 | 382.79   | 1093.86   | 2640.63   | 7059.59   | 0.73 | 1.16  | 2.77  | 5.75   | 13.65  |
| 0.33 | 329.31   | 945.63    | 2224.34   | 6117.58   | 0.74 | 0.99  | 2.33  | 4.92   | 11.24  |
| 0.34 | 282.90   | 827.54    | 1955.92   | 5203.30   | 0.75 | 0.85  | 1.98  | 4.09   | 9.38   |
| 0.35 | 242.51   | 701.25    | 1671.49   | 4384.25   | 0.76 | 0.73  | 1.67  | 3.46   | 7.97   |
| 0.36 | 208.67   | 598.17    | 1444.75   | 3824.95   | 0.77 | 0.62  | 1.41  | 2.87   | 6.64   |
| 0.37 | 178.73   | 510.26    | 1256.17   | 3263.24   | 0.78 | 0.53  | 1.18  | 2.40   | 5.56   |
| 0.38 | 153.01   | 446.27    | 1074.49   | 2929.34   | 0.79 | 0.45  | 1.00  | 2.03   | 4.53   |
| 0.39 | 131.66   | 380.44    | 917.90    | 2485.17   | 0.80 | 0.38  | 0.84  | 1.65   | 3.64   |
| 0.40 | 113.84   | 324.01    | 792.07    | 2145.07   | 0.81 | 0.33  | 0.70  | 1.36   | 2.92   |
| 0.41 | 98.75    | 281.82    | 687.43    | 1841.10   | 0.82 | 0.28  | 0.57  | 1.11   | 2.40   |
| 0.42 | 86.54    | 247.33    | 598.67    | 1535.95   | 0.83 | 0.23  | 0.47  | 0.89   | 1.93   |
| 0.43 | 76.37    | 213.70    | 522.26    | 1362.56   | 0.84 | 0.20  | 0.39  | 0.74   | 1.56   |
| 0.44 | 67.10    | 186.64    | 456.54    | 1191.08   | 0.85 | 0.17  | 0.32  | 0.58   | 1.23   |
| 0.45 | 57.85    | 162.06    | 387.93    | 1019.79   | 0.86 | 0.14  | 0.26  | 0.46   | 0.97   |
| 0.46 | 50.85    | 141.54    | 338.17    | 878.36    | 0.87 | 0.11  | 0.21  | 0.37   | 0.76   |
| 0.47 | 44.01    | 123.69    | 290.78    | 765.91    | 0.88 | 0.09  | 0.17  | 0.29   | 0.59   |
| 0.48 | 38.52    | 107.35    | 249.84    | 666.54    | 0.89 | 0.08  | 0.14  | 0.23   | 0.44   |
| 0.49 | 33.69    | 93.84     | 218.34    | 574.76    | 0.90 | 0.06  | 0.11  | 0.18   | 0.35   |
| 0.50 | 29.18    | 81.51     | 189.01    | 501.81    |      |       |       |        |        |

Table S23: Critical values for detector  $\hat{H}^m$  and IM-OLS estimation in a model with intercept. The number of integrated regressors is 1 and the highest power of  $x_{kt}$  is 2.



| m    | 90 %     | 95 %     | 97,5 %    | 99 %      | m    | 90 %  | 95 %  | 97,5 % | 99 %   |
|------|----------|----------|-----------|-----------|------|-------|-------|--------|--------|
| 0.10 | 21831.87 | 49869.91 | 101453.99 | 231957.04 | 0.51 | 12.45 | 25.20 | 49.33  | 108.10 |
| 0.11 | 15388.74 | 34988.05 | 73500.71  | 167788.81 | 0.52 | 10.87 | 22.01 | 42.18  | 91.75  |
| 0.12 | 11028.38 | 25621.99 | 52267.03  | 121136.89 | 0.53 | 9.50  | 19.06 | 36.13  | 78.72  |
| 0.13 | 8101.12  | 18027.83 | 38282.91  | 90386.89  | 0.54 | 8.31  | 16.63 | 32.02  | 70.20  |
| 0.14 | 6104.40  | 13687.59 | 28350.38  | 67492.78  | 0.55 | 7.30  | 14.45 | 27.79  | 60.82  |
| 0.15 | 4660.42  | 10547.87 | 21733.72  | 50067.22  | 0.56 | 6.43  | 12.78 | 23.88  | 53.26  |
| 0.16 | 3619.06  | 8134.17  | 16692.08  | 38663.12  | 0.57 | 5.71  | 11.09 | 21.18  | 46.17  |
| 0.17 | 2816.35  | 6267.39  | 13058.30  | 28794.88  | 0.58 | 4.94  | 9.66  | 18.28  | 39.15  |
| 0.18 | 2236.84  | 4966.42  | 10165.56  | 23379.14  | 0.59 | 4.37  | 8.36  | 15.69  | 34.38  |
| 0.19 | 1797.09  | 3950.88  | 8186.58   | 18655.59  | 0.60 | 3.78  | 7.30  | 13.89  | 29.25  |
| 0.20 | 1434.68  | 3197.61  | 6668.23   | 14931.82  | 0.61 | 3.30  | 6.33  | 11.75  | 25.03  |
| 0.21 | 1165.83  | 2576.08  | 5403.53   | 12454.41  | 0.62 | 2.86  | 5.45  | 10.10  | 21.53  |
| 0.22 | 959.00   | 2124.87  | 4351.19   | 10014.20  | 0.63 | 2.50  | 4.71  | 8.78   | 18.86  |
| 0.23 | 796.32   | 1749.17  | 3632.08   | 8237.57   | 0.64 | 2.16  | 4.09  | 7.42   | 15.48  |
| 0.24 | 664.51   | 1444.25  | 3034.69   | 7065.40   | 0.65 | 1.89  | 3.51  | 6.48   | 13.30  |
| 0.25 | 550.17   | 1223.99  | 2529.22   | 5865.88   | 0.66 | 1.63  | 3.03  | 5.57   | 11.54  |
| 0.26 | 464.90   | 1013.60  | 2081.49   | 4917.41   | 0.67 | 1.43  | 2.60  | 4.64   | 9.46   |
| 0.27 | 394.36   | 854.03   | 1725.41   | 4098.23   | 0.68 | 1.24  | 2.22  | 3.94   | 8.12   |
| 0.28 | 328.71   | 716.87   | 1452.76   | 3428.95   | 0.69 | 1.08  | 1.92  | 3.36   | 6.82   |
| 0.29 | 279.09   | 613.60   | 1234.02   | 2814.88   | 0.70 | 0.93  | 1.65  | 2.88   | 5.67   |
| 0.30 | 237.16   | 517.39   | 1034.43   | 2472.72   | 0.71 | 0.80  | 1.42  | 2.44   | 4.83   |
| 0.31 | 203.51   | 441.54   | 921.45    | 2099.91   | 0.72 | 0.69  | 1.22  | 2.08   | 4.11   |
| 0.32 | 173.95   | 372.32   | 760.97    | 1787.02   | 0.73 | 0.60  | 1.05  | 1.77   | 3.50   |
| 0.33 | 149.77   | 322.07   | 653.51    | 1526.91   | 0.74 | 0.52  | 0.89  | 1.51   | 2.84   |
| 0.34 | 127.98   | 275.28   | 567.17    | 1290.86   | 0.75 | 0.44  | 0.76  | 1.26   | 2.36   |
| 0.35 | 110.68   | 235.39   | 482.36    | 1127.56   | 0.76 | 0.38  | 0.64  | 1.05   | 2.01   |
| 0.36 | 95.80    | 203.71   | 404.72    | 941.16    | 0.77 | 0.32  | 0.54  | 0.89   | 1.70   |
| 0.37 | 82.28    | 175.91   | 348.38    | 816.15    | 0.78 | 0.27  | 0.46  | 0.74   | 1.37   |
| 0.38 | 70.80    | 153.75   | 300.67    | 712.14    | 0.79 | 0.23  | 0.38  | 0.60   | 1.09   |
| 0.39 | 62.01    | 129.65   | 258.67    | 599.87    | 0.80 | 0.20  | 0.32  | 0.50   | 0.89   |
| 0.40 | 53.80    | 114.09   | 225.86    | 514.67    | 0.81 | 0.16  | 0.26  | 0.41   | 0.72   |
| 0.41 | 47.13    | 98.90    | 193.94    | 437.10    | 0.82 | 0.14  | 0.22  | 0.34   | 0.58   |
| 0.42 | 41.10    | 86.36    | 172.98    | 382.28    | 0.83 | 0.11  | 0.18  | 0.27   | 0.46   |
| 0.43 | 35.80    | 76.37    | 146.18    | 325.40    | 0.84 | 0.09  | 0.15  | 0.22   | 0.36   |
| 0.44 | 31.65    | 65.59    | 127.45    | 281.82    | 0.85 | 0.08  | 0.12  | 0.17   | 0.29   |
| 0.45 | 27.44    | 57.26    | 111.23    | 244.48    | 0.86 | 0.06  | 0.09  | 0.14   | 0.22   |
| 0.46 | 23.97    | 49.79    | 97.93     | 215.25    | 0.87 | 0.05  | 0.08  | 0.11   | 0.17   |
| 0.47 | 21.16    | 43.45    | 85.33     | 183.76    | 0.88 | 0.04  | 0.06  | 0.08   | 0.13   |
| 0.48 | 18.44    | 38.08    | 73.67     | 162.02    | 0.89 | 0.03  | 0.05  | 0.06   | 0.10   |
| 0.49 | 16.19    | 33.02    | 65.28     | 140.75    | 0.90 | 0.02  | 0.04  | 0.05   | 0.07   |
| 0.50 | 14.13    | 28.92    | 56.39     | 122.77    |      |       |       |        |        |

Table S24: Critical values for detector  $\hat{H}^m$  and FM-OLS and D-OLS estimation in a model with intercept and linear trend. The number of integrated regressors is 1 and the highest power of  $x_{kt}$  is 2.

| m    | 90 %     | 95 %      | 97,5 %    | 99 %      | m    | 90 %  | 95 %  | 97,5 % | 99 %   |
|------|----------|-----------|-----------|-----------|------|-------|-------|--------|--------|
| 0.10 | 55565.18 | 139406.72 | 309365.51 | 796213.51 | 0.51 | 29.16 | 65.85 | 139.97 | 348.16 |
| 0.11 | 39736.46 | 97566.75  | 220121.33 | 574094.88 | 0.52 | 25.48 | 57.23 | 124.36 | 303.42 |
| 0.12 | 27915.10 | 70546.23  | 162122.89 | 412433.58 | 0.53 | 22.12 | 50.10 | 106.43 | 266.87 |
| 0.13 | 20745.22 | 50934.68  | 116149.27 | 293089.64 | 0.54 | 19.41 | 43.74 | 92.59  | 232.14 |
| 0.14 | 15317.35 | 38775.13  | 86506.70  | 218686.97 | 0.55 | 16.95 | 38.13 | 80.90  | 196.09 |
| 0.15 | 11648.65 | 28926.40  | 65994.02  | 166648.80 | 0.56 | 14.82 | 33.02 | 69.49  | 169.61 |
| 0.16 | 9038.96  | 22704.16  | 50643.39  | 126207.16 | 0.57 | 12.96 | 28.54 | 60.15  | 149.70 |
| 0.17 | 7068.53  | 17486.94  | 39010.14  | 98933.02  | 0.58 | 11.36 | 24.73 | 52.69  | 131.14 |
| 0.18 | 5577.27  | 13884.64  | 30474.16  | 78365.95  | 0.59 | 9.91  | 21.57 | 45.61  | 113.98 |
| 0.19 | 4420.61  | 10954.88  | 24274.39  | 59984.17  | 0.60 | 8.68  | 18.92 | 40.05  | 97.64  |
| 0.20 | 3570.56  | 8632.30   | 19656.00  | 49995.40  | 0.61 | 7.53  | 16.51 | 34.48  | 83.23  |
| 0.21 | 2877.15  | 7097.67   | 15995.02  | 39304.36  | 0.62 | 6.56  | 14.18 | 29.17  | 70.80  |
| 0.22 | 2347.92  | 5717.30   | 12975.88  | 31991.98  | 0.63 | 5.77  | 12.31 | 25.37  | 61.31  |
| 0.23 | 1942.18  | 4797.80   | 10773.46  | 27252.41  | 0.64 | 5.00  | 10.68 | 22.21  | 52.29  |
| 0.24 | 1614.20  | 4013.06   | 9050.77   | 22700.06  | 0.65 | 4.38  | 9.28  | 18.84  | 44.98  |
| 0.25 | 1375.04  | 3345.49   | 7527.07   | 19384.47  | 0.66 | 3.77  | 7.98  | 16.04  | 38.42  |
| 0.26 | 1147.38  | 2797.47   | 6293.50   | 15739.00  | 0.67 | 3.28  | 6.84  | 13.72  | 32.44  |
| 0.27 | 969.70   | 2339.26   | 5169.71   | 12983.96  | 0.68 | 2.84  | 5.90  | 11.82  | 26.97  |
| 0.28 | 816.43   | 1965.93   | 4370.89   | 10878.81  | 0.69 | 2.47  | 5.07  | 10.05  | 22.33  |
| 0.29 | 681.59   | 1676.57   | 3665.21   | 9129.06   | 0.70 | 2.13  | 4.30  | 8.52   | 18.86  |
| 0.30 | 577.74   | 1392.47   | 3107.97   | 7741.10   | 0.71 | 1.85  | 3.71  | 7.11   | 15.81  |
| 0.31 | 493.27   | 1195.90   | 2671.86   | 6709.11   | 0.72 | 1.60  | 3.16  | 6.08   | 13.35  |
| 0.32 | 423.49   | 1043.45   | 2264.52   | 5633.88   | 0.73 | 1.38  | 2.68  | 5.12   | 11.21  |
| 0.33 | 361.56   | 874.54    | 1949.05   | 4775.56   | 0.74 | 1.18  | 2.28  | 4.29   | 9.21   |
| 0.34 | 311.48   | 752.93    | 1661.65   | 4027.12   | 0.75 | 1.02  | 1.92  | 3.57   | 7.65   |
| 0.35 | 264.47   | 630.52    | 1394.89   | 3562.68   | 0.76 | 0.87  | 1.64  | 3.00   | 6.43   |
| 0.36 | 228.06   | 537.41    | 1204.61   | 3045.77   | 0.77 | 0.74  | 1.39  | 2.51   | 5.28   |
| 0.37 | 196.25   | 471.82    | 1051.49   | 2647.16   | 0.78 | 0.63  | 1.18  | 2.12   | 4.39   |
| 0.38 | 168.93   | 402.92    | 912.56    | 2340.35   | 0.79 | 0.54  | 0.98  | 1.77   | 3.56   |
| 0.39 | 146.77   | 347.77    | 786.04    | 2037.51   | 0.80 | 0.45  | 0.82  | 1.46   | 2.90   |
| 0.40 | 127.56   | 302.74    | 675.58    | 1736.78   | 0.81 | 0.38  | 0.68  | 1.20   | 2.36   |
| 0.41 | 110.91   | 264.85    | 582.36    | 1487.55   | 0.82 | 0.32  | 0.56  | 0.98   | 1.93   |
| 0.42 | 96.69    | 228.56    | 501.14    | 1276.09   | 0.83 | 0.27  | 0.47  | 0.79   | 1.59   |
| 0.43 | 84.31    | 200.99    | 437.23    | 1086.98   | 0.84 | 0.22  | 0.38  | 0.64   | 1.27   |
| 0.44 | 73.42    | 175.97    | 381.81    | 960.56    | 0.85 | 0.19  | 0.31  | 0.52   | 0.99   |
| 0.45 | 64.56    | 152.11    | 330.67    | 839.12    | 0.86 | 0.15  | 0.25  | 0.41   | 0.78   |
| 0.46 | 56.49    | 133.39    | 283.58    | 720.60    | 0.87 | 0.13  | 0.21  | 0.33   | 0.60   |
| 0.47 | 49.36    | 116.18    | 245.72    | 609.09    | 0.88 | 0.10  | 0.16  | 0.26   | 0.46   |
| 0.48 | 43.03    | 101.03    | 211.74    | 514.79    | 0.89 | 0.08  | 0.13  | 0.20   | 0.35   |
| 0.49 | 37.61    | 86.95     | 183.34    | 450.17    | 0.90 | 0.07  | 0.10  | 0.15   | 0.27   |
| 0.50 | 32.88    | 74.89     | 161.01    | 395.63    |      |       |       |        |        |

Table S25: Critical values for detector  $\hat{H}^m$  and IM-OLS estimation in a model with intercept and linear trend. The number of integrated regressors is 1 and the highest power of  $x_{kt}$  is 2.

| m    | 90 %       | 95 %       | 97,5 %      | 99 %        | m    | 90 %  | 95 %   | 97,5 % | 99 %    |
|------|------------|------------|-------------|-------------|------|-------|--------|--------|---------|
| 0.10 | 1321264.38 | 5005587.04 | 14790619.28 | 49775963.44 | 0.51 | 95.49 | 338.01 | 925.02 | 2911.71 |
| 0.11 | 859078.38  | 3203985.76 | 9832410.89  | 31197444.23 | 0.52 | 79.50 | 287.64 | 785.74 | 2477.12 |
| 0.12 | 573222.40  | 2143819.35 | 6533777.42  | 21068010.21 | 0.53 | 67.81 | 246.17 | 675.47 | 2070.23 |
| 0.13 | 392808.66  | 1500741.32 | 4515166.95  | 14812056.26 | 0.54 | 57.50 | 210.34 | 573.79 | 1732.35 |
| 0.14 | 273271.70  | 1018314.35 | 3223726.15  | 10479899.27 | 0.55 | 47.18 | 173.26 | 476.35 | 1440.60 |
| 0.15 | 196816.44  | 723612.21  | 2193614.57  | 7678771.06  | 0.56 | 40.03 | 142.47 | 402.87 | 1246.96 |
| 0.16 | 143859.60  | 516660.95  | 1550073.99  | 5380352.37  | 0.57 | 33.04 | 115.59 | 332.26 | 998.70  |
| 0.17 | 106741.43  | 386958.80  | 1150525.31  | 3966957.87  | 0.58 | 27.57 | 96.08  | 277.56 | 832.27  |
| 0.18 | 79921.71   | 288720.08  | 846453.03   | 2988446.68  | 0.59 | 23.07 | 78.99  | 225.23 | 706.34  |
| 0.19 | 60213.81   | 218842.08  | 648076.31   | 2209020.85  | 0.60 | 18.98 | 65.99  | 187.16 | 592.39  |
| 0.20 | 45563.43   | 165509.75  | 504057.03   | 1653984.99  | 0.61 | 15.91 | 54.57  | 153.07 | 477.81  |
| 0.21 | 35676.52   | 128811.77  | 386616.64   | 1271028.34  | 0.62 | 12.95 | 44.91  | 125.39 | 388.86  |
| 0.22 | 27641.54   | 101110.41  | 303299.66   | 1021196.94  | 0.63 | 11.04 | 37.30  | 104.06 | 318.70  |
| 0.23 | 21666.56   | 80250.75   | 229889.55   | 759259.36   | 0.64 | 9.15  | 30.91  | 84.42  | 259.47  |
| 0.24 | 17087.28   | 62422.62   | 181080.70   | 594623.69   | 0.65 | 7.60  | 25.89  | 68.15  | 203.12  |
| 0.25 | 13512.06   | 48826.14   | 143236.85   | 479765.16   | 0.66 | 6.28  | 21.30  | 55.63  | 163.21  |
| 0.26 | 10733.05   | 38897.79   | 113042.05   | 370576.27   | 0.67 | 5.15  | 17.03  | 44.62  | 134.34  |
| 0.27 | 8540.34    | 31245.34   | 92032.45    | 288538.87   | 0.68 | 4.36  | 13.85  | 35.65  | 106.34  |
| 0.28 | 6955.32    | 24917.14   | 70733.10    | 222942.27   | 0.69 | 3.53  | 11.26  | 29.61  | 89.57   |
| 0.29 | 5539.71    | 20210.84   | 56626.93    | 183284.96   | 0.70 | 2.88  | 9.29   | 23.54  | 69.89   |
| 0.30 | 4561.19    | 16570.25   | 47303.69    | 150462.32   | 0.71 | 2.36  | 7.49   | 19.08  | 55.91   |
| 0.31 | 3735.14    | 13430.81   | 38466.65    | 125762.08   | 0.72 | 1.93  | 6.02   | 15.57  | 45.85   |
| 0.32 | 3028.04    | 11005.57   | 32097.97    | 105159.46   | 0.73 | 1.58  | 4.85   | 12.35  | 35.64   |
| 0.33 | 2473.18    | 9225.82    | 26474.06    | 82268.03    | 0.74 | 1.28  | 3.95   | 9.82   | 28.19   |
| 0.34 | 2032.35    | 7551.42    | 21996.30    | 68968.78    | 0.75 | 1.03  | 3.16   | 8.05   | 22.43   |
| 0.35 | 1707.63    | 6161.30    | 17933.59    | 58644.59    | 0.76 | 0.84  | 2.50   | 6.32   | 17.39   |
| 0.36 | 1424.86    | 5157.35    | 14765.10    | 47948.05    | 0.77 | 0.68  | 2.01   | 4.96   | 13.45   |
| 0.37 | 1164.22    | 4276.68    | 12261.50    | 38649.41    | 0.78 | 0.54  | 1.56   | 3.89   | 10.38   |
| 0.38 | 968.69     | 3546.19    | 10205.47    | 31830.86    | 0.79 | 0.44  | 1.25   | 3.06   | 8.01    |
| 0.39 | 795.90     | 2910.15    | 8383.79     | 26254.39    | 0.80 | 0.35  | 0.98   | 2.33   | 6.28    |
| 0.40 | 668.55     | 2414.95    | 6889.52     | 22137.57    | 0.81 | 0.27  | 0.76   | 1.79   | 4.79    |
| 0.41 | 549.74     | 2001.60    | 5778.43     | 18505.89    | 0.82 | 0.22  | 0.59   | 1.37   | 3.67    |
| 0.42 | 458.39     | 1669.94    | 4774.12     | 15311.92    | 0.83 | 0.17  | 0.44   | 1.04   | 2.72    |
| 0.43 | 389.09     | 1406.13    | 4061.10     | 12629.79    | 0.84 | 0.13  | 0.34   | 0.78   | 2.04    |
| 0.44 | 323.71     | 1167.67    | 3320.81     | 10265.03    | 0.85 | 0.10  | 0.26   | 0.58   | 1.44    |
| 0.45 | 275.85     | 975.78     | 2711.96     | 8705.35     | 0.86 | 0.08  | 0.19   | 0.42   | 1.04    |
| 0.46 | 230.09     | 824.40     | 2381.26     | 7071.84     | 0.87 | 0.06  | 0.14   | 0.31   | 0.75    |
| 0.47 | 193.86     | 681.20     | 1952.28     | 6088.61     | 0.88 | 0.05  | 0.10   | 0.21   | 0.51    |
| 0.48 | 162.69     | 567.26     | 1586.38     | 4891.50     | 0.89 | 0.04  | 0.07   | 0.15   | 0.35    |
| 0.49 | 138.00     | 479.69     | 1323.98     | 4079.75     | 0.90 | 0.03  | 0.05   | 0.10   | 0.24    |
| 0.50 | 114.96     | 403.71     | 1124.92     | 3532.76     |      |       |        |        |         |

Table S26: Critical values for detector  $\hat{H}^m$  and FM-OLS and D-OLS estimation in a model with intercept. The number of integrated regressors is 1 and the highest power of  $x_{kt}$  is 3.

| m    | 90 %       | 95 %        | 97,5 %       | 99 %         | m    | 90 %   | 95 %    | 97,5 %  | 99 %     |
|------|------------|-------------|--------------|--------------|------|--------|---------|---------|----------|
| 0.10 | 6965744.47 | 29360299.90 | 100158404.76 | 367798571.94 | 0.51 | 474.07 | 1821.88 | 5781.99 | 21844.31 |
| 0.11 | 4548168.27 | 18638500.36 | 63791182.25  | 236453712.38 | 0.52 | 393.95 | 1538.10 | 4863.86 | 18679.15 |
| 0.12 | 3004871.37 | 12524606.21 | 40602074.38  | 149026548.71 | 0.53 | 330.56 | 1287.61 | 4146.43 | 15702.80 |
| 0.13 | 2068686.68 | 8621290.37  | 27800096.34  | 101681407.98 | 0.54 | 276.60 | 1091.29 | 3438.66 | 12952.28 |
| 0.14 | 1451365.25 | 6064227.47  | 20029679.35  | 71481816.82  | 0.55 | 233.61 | 916.42  | 2841.63 | 10525.37 |
| 0.15 | 1026237.72 | 4349734.51  | 14260383.70  | 52555604.57  | 0.56 | 197.20 | 766.25  | 2392.08 | 8708.16  |
| 0.16 | 744209.19  | 3084873.36  | 10248345.64  | 37963136.10  | 0.57 | 164.65 | 649.42  | 1986.10 | 7223.84  |
| 0.17 | 542829.39  | 2283187.04  | 7644136.41   | 28055334.41  | 0.58 | 136.80 | 538.29  | 1686.78 | 6034.78  |
| 0.18 | 401605.59  | 1728519.51  | 5760242.28   | 21631306.08  | 0.59 | 113.81 | 447.48  | 1386.34 | 5073.20  |
| 0.19 | 311810.50  | 1264912.84  | 4256200.03   | 16271539.15  | 0.60 | 93.49  | 371.55  | 1161.53 | 4247.47  |
| 0.20 | 236290.05  | 958815.36   | 3244148.69   | 12552042.91  | 0.61 | 77.61  | 302.82  | 974.40  | 3444.97  |
| 0.21 | 180626.98  | 736430.29   | 2482806.80   | 9711088.77   | 0.62 | 64.88  | 257.35  | 786.61  | 2839.79  |
| 0.22 | 139924.72  | 581204.44   | 1935912.82   | 7534586.13   | 0.63 | 54.28  | 206.79  | 635.95  | 2307.89  |
| 0.23 | 112506.68  | 459136.76   | 1514195.79   | 5744745.80   | 0.64 | 44.67  | 173.10  | 518.95  | 1855.64  |
| 0.24 | 88832.39   | 362267.47   | 1163292.77   | 4515982.33   | 0.65 | 37.20  | 142.17  | 428.92  | 1473.34  |
| 0.25 | 70232.81   | 280549.49   | 896329.85    | 3489456.94   | 0.66 | 30.77  | 115.92  | 341.75  | 1217.41  |
| 0.26 | 55909.46   | 225359.77   | 710666.82    | 2735465.72   | 0.67 | 24.99  | 92.75   | 277.92  | 1022.73  |
| 0.27 | 43784.64   | 184591.65   | 575912.32    | 2227630.80   | 0.68 | 20.66  | 76.72   | 225.42  | 792.41   |
| 0.28 | 35565.71   | 146537.41   | 470199.35    | 1761862.86   | 0.69 | 17.12  | 63.89   | 184.25  | 614.05   |
| 0.29 | 28609.78   | 117191.73   | 371166.57    | 1393272.35   | 0.70 | 14.20  | 52.54   | 151.01  | 496.07   |
| 0.30 | 23163.19   | 95363.89    | 305789.13    | 1114260.82   | 0.71 | 11.56  | 42.28   | 124.36  | 401.95   |
| 0.31 | 19124.35   | 80166.37    | 256351.00    | 932681.94    | 0.72 | 9.38   | 34.08   | 100.19  | 328.27   |
| 0.32 | 15822.02   | 66037.29    | 211782.78    | 774621.29    | 0.73 | 7.59   | 27.66   | 80.49   | 270.75   |
| 0.33 | 12857.07   | 55031.22    | 174107.85    | 634651.89    | 0.74 | 6.23   | 22.22   | 64.48   | 213.25   |
| 0.34 | 10589.27   | 45370.88    | 142782.39    | 523562.98    | 0.75 | 5.03   | 17.93   | 51.44   | 163.98   |
| 0.35 | 8710.49    | 36891.55    | 117721.03    | 420453.71    | 0.76 | 4.06   | 14.10   | 40.05   | 127.56   |
| 0.36 | 7186.41    | 30194.18    | 98218.63     | 357128.36    | 0.77 | 3.24   | 11.15   | 31.19   | 98.73    |
| 0.37 | 5909.72    | 24451.26    | 82188.54     | 292673.40    | 0.78 | 2.54   | 8.68    | 24.57   | 77.44    |
| 0.38 | 4906.75    | 20625.48    | 68237.16     | 246718.61    | 0.79 | 2.02   | 6.87    | 19.37   | 60.43    |
| 0.39 | 4172.68    | 17033.04    | 56229.47     | 206451.06    | 0.80 | 1.59   | 5.42    | 14.98   | 47.19    |
| 0.40 | 3475.12    | 14192.78    | 45637.91     | 172421.00    | 0.81 | 1.25   | 4.25    | 11.57   | 36.03    |
| 0.41 | 2846.80    | 11552.14    | 38381.57     | 145038.13    | 0.82 | 0.98   | 3.31    | 8.99    | 27.42    |
| 0.42 | 2375.47    | 9679.81     | 31756.10     | 119116.76    | 0.83 | 0.76   | 2.52    | 6.86    | 21.03    |
| 0.43 | 1978.28    | 8088.79     | 26150.33     | 95229.58     | 0.84 | 0.59   | 1.88    | 5.15    | 16.14    |
| 0.44 | 1618.56    | 6744.87     | 21347.61     | 78723.85     | 0.85 | 0.44   | 1.43    | 3.85    | 11.69    |
| 0.45 | 1386.69    | 5520.21     | 17809.49     | 65394.77     | 0.86 | 0.34   | 1.07    | 2.79    | 8.37     |
| 0.46 | 1142.18    | 4602.96     | 14971.94     | 54184.93     | 0.87 | 0.26   | 0.78    | 1.98    | 5.95     |
| 0.47 | 954.68     | 3891.81     | 12390.24     | 43666.75     | 0.88 | 0.20   | 0.56    | 1.39    | 4.15     |
| 0.48 | 790.74     | 3199.36     | 10373.51     | 37840.22     | 0.89 | 0.15   | 0.40    | 0.99    | 2.90     |
| 0.49 | 660.72     | 2669.13     | 8419.94      | 31334.86     | 0.90 | 0.11   | 0.28    | 0.67    | 1.92     |
| 0.50 | 557.54     | 2220.13     | 6954.50      | 25637.92     |      |        |         |         |          |

Table S27: Critical values for detector  $\hat{H}^m$  and IM-OLS estimation in a model with intercept. The number of integrated regressors is 1 and the highest power of  $x_{kt}$  is 3.

| m    | 90 %       | 95 %       | 97,5 %      | 99 %        | m    | 90 %   | 95 %   | 97,5 % | 99 %    |
|------|------------|------------|-------------|-------------|------|--------|--------|--------|---------|
| 0.10 | 1828043.24 | 6475168.86 | 17962415.42 | 56701049.37 | 0.51 | 102.64 | 357.61 | 982.37 | 2970.02 |
| 0.11 | 1180104.47 | 4158707.97 | 11783988.14 | 36769981.71 | 0.52 | 86.28  | 304.87 | 814.51 | 2558.36 |
| 0.12 | 771556.13  | 2702854.54 | 7933095.63  | 24639036.64 | 0.53 | 73.56  | 257.19 | 698.97 | 2112.14 |
| 0.13 | 519862.76  | 1873074.19 | 5410393.77  | 17339866.41 | 0.54 | 62.27  | 218.67 | 596.95 | 1780.71 |
| 0.14 | 353146.60  | 1262995.08 | 3715668.94  | 12237617.50 | 0.55 | 51.30  | 182.25 | 488.21 | 1490.30 |
| 0.15 | 249741.19  | 874094.49  | 2561694.26  | 8692828.94  | 0.56 | 43.31  | 149.30 | 417.42 | 1264.31 |
| 0.16 | 179419.93  | 619193.22  | 1790118.55  | 6008343.16  | 0.57 | 35.94  | 124.13 | 347.41 | 1025.41 |
| 0.17 | 132354.83  | 461574.44  | 1284484.04  | 4346572.10  | 0.58 | 29.93  | 102.32 | 288.29 | 851.39  |
| 0.18 | 98362.20   | 340814.73  | 965375.79   | 3287484.11  | 0.59 | 25.01  | 83.93  | 235.89 | 719.44  |
| 0.19 | 73917.97   | 254985.94  | 734366.19   | 2429434.42  | 0.60 | 20.45  | 68.95  | 196.83 | 603.21  |
| 0.20 | 56482.56   | 192850.37  | 560616.28   | 1831527.93  | 0.61 | 17.25  | 57.96  | 158.12 | 493.31  |
| 0.21 | 42664.40   | 148686.69  | 430691.15   | 1396133.31  | 0.62 | 14.09  | 47.48  | 130.47 | 400.00  |
| 0.22 | 32666.68   | 115223.32  | 337819.72   | 1112477.09  | 0.63 | 11.94  | 39.40  | 107.59 | 331.11  |
| 0.23 | 25547.45   | 91148.12   | 250603.41   | 830860.10   | 0.64 | 9.95   | 32.98  | 88.67  | 273.32  |
| 0.24 | 20017.52   | 70523.43   | 200451.35   | 638526.81   | 0.65 | 8.28   | 26.78  | 71.60  | 215.37  |
| 0.25 | 15599.15   | 55184.01   | 156481.04   | 511798.23   | 0.66 | 6.96   | 22.36  | 57.77  | 165.50  |
| 0.26 | 12237.69   | 44107.06   | 126142.04   | 388916.12   | 0.67 | 5.68   | 17.88  | 47.14  | 139.66  |
| 0.27 | 9953.67    | 34688.39   | 100185.61   | 314179.77   | 0.68 | 4.75   | 14.60  | 37.51  | 110.48  |
| 0.28 | 7945.65    | 27953.20   | 77704.36    | 242207.57   | 0.69 | 3.85   | 12.00  | 31.22  | 92.43   |
| 0.29 | 6419.34    | 21993.53   | 63443.27    | 197685.21   | 0.70 | 3.20   | 9.83   | 24.83  | 73.21   |
| 0.30 | 5155.03    | 17979.77   | 51412.17    | 161195.26   | 0.71 | 2.64   | 8.00   | 20.24  | 58.00   |
| 0.31 | 4191.74    | 14729.84   | 41778.35    | 130107.46   | 0.72 | 2.14   | 6.45   | 16.19  | 47.94   |
| 0.32 | 3395.08    | 12200.22   | 34273.92    | 110135.83   | 0.73 | 1.79   | 5.18   | 12.86  | 37.50   |
| 0.33 | 2826.40    | 10200.64   | 28406.76    | 89705.09    | 0.74 | 1.46   | 4.19   | 10.36  | 29.44   |
| 0.34 | 2277.09    | 8243.40    | 23197.77    | 73554.74    | 0.75 | 1.19   | 3.38   | 8.52   | 22.86   |
| 0.35 | 1889.00    | 6755.57    | 19011.99    | 62154.50    | 0.76 | 0.98   | 2.65   | 6.53   | 18.04   |
| 0.36 | 1583.56    | 5587.50    | 15791.29    | 51053.63    | 0.77 | 0.79   | 2.14   | 5.28   | 14.04   |
| 0.37 | 1284.87    | 4515.19    | 12782.51    | 41257.24    | 0.78 | 0.64   | 1.71   | 4.10   | 10.59   |
| 0.38 | 1065.79    | 3802.59    | 10785.46    | 34321.37    | 0.79 | 0.52   | 1.34   | 3.17   | 8.40    |
| 0.39 | 871.93     | 3052.67    | 8774.09     | 28082.83    | 0.80 | 0.42   | 1.05   | 2.49   | 6.57    |
| 0.40 | 732.92     | 2572.96    | 7205.82     | 22861.96    | 0.81 | 0.33   | 0.82   | 1.89   | 4.95    |
| 0.41 | 601.99     | 2140.11    | 5999.36     | 18885.14    | 0.82 | 0.26   | 0.63   | 1.44   | 3.76    |
| 0.42 | 505.07     | 1773.87    | 5038.73     | 15783.91    | 0.83 | 0.21   | 0.48   | 1.06   | 2.77    |
| 0.43 | 422.91     | 1473.06    | 4168.24     | 12876.30    | 0.84 | 0.16   | 0.37   | 0.81   | 2.07    |
| 0.44 | 356.06     | 1239.13    | 3472.95     | 10691.00    | 0.85 | 0.13   | 0.28   | 0.61   | 1.51    |
| 0.45 | 301.35     | 1036.76    | 2843.35     | 8807.33     | 0.86 | 0.10   | 0.21   | 0.44   | 1.10    |
| 0.46 | 250.91     | 869.37     | 2452.53     | 7417.43     | 0.87 | 0.08   | 0.15   | 0.32   | 0.76    |
| 0.47 | 209.10     | 718.42     | 2037.01     | 6341.86     | 0.88 | 0.06   | 0.11   | 0.22   | 0.53    |
| 0.48 | 177.67     | 599.46     | 1645.15     | 5217.91     | 0.89 | 0.04   | 0.08   | 0.16   | 0.37    |
| 0.49 | 148.55     | 511.64     | 1405.82     | 4185.75     | 0.90 | 0.03   | 0.06   | 0.11   | 0.25    |
| 0.50 | 122.80     | 426.07     | 1179.15     | 3610.49     |      |        |        |        |         |

Table S28: Critical values for detector  $\hat{H}^m$  and FM-OLS and D-OLS estimation in a model with intercept and linear trend. The number of integrated regressors is 1 and the highest power of  $x_{kt}$  is 3.

| m    | 90 %       | 95 %        | 97,5 %      | 99 %         | m    | 90 %   | 95 %    | 97,5 %  | 99 %     |
|------|------------|-------------|-------------|--------------|------|--------|---------|---------|----------|
| 0.10 | 7417276.55 | 28520716.93 | 91280312.85 | 315491839.41 | 0.51 | 386.04 | 1487.86 | 4532.42 | 15917.76 |
| 0.11 | 4751701.45 | 18230780.34 | 59462284.81 | 208766792.44 | 0.52 | 324.90 | 1246.97 | 3638.99 | 13279.87 |
| 0.12 | 3152211.06 | 11865348.99 | 37498005.07 | 140298384.68 | 0.53 | 273.75 | 1039.14 | 3115.13 | 10925.38 |
| 0.13 | 2103209.75 | 8139382.95  | 25291032.41 | 90312648.89  | 0.54 | 227.32 | 861.59  | 2625.70 | 9343.96  |
| 0.14 | 1451226.85 | 5680302.99  | 17464040.59 | 62895313.31  | 0.55 | 189.85 | 725.42  | 2245.18 | 7891.43  |
| 0.15 | 1027535.99 | 3961132.52  | 12356589.67 | 44094941.22  | 0.56 | 160.38 | 603.54  | 1917.87 | 6453.85  |
| 0.16 | 721788.67  | 2766704.97  | 8737770.84  | 31104799.59  | 0.57 | 135.63 | 504.40  | 1566.40 | 5456.60  |
| 0.17 | 524976.86  | 2068056.14  | 6419021.10  | 23292701.22  | 0.58 | 113.18 | 425.04  | 1273.20 | 4524.13  |
| 0.18 | 387632.51  | 1519403.28  | 4737373.46  | 17728913.63  | 0.59 | 93.68  | 346.62  | 1033.32 | 3751.16  |
| 0.19 | 295140.14  | 1130774.44  | 3558114.36  | 13554956.40  | 0.60 | 77.35  | 284.60  | 852.76  | 3123.04  |
| 0.20 | 220280.10  | 851789.48   | 2749807.14  | 9835069.29   | 0.61 | 63.90  | 238.06  | 710.12  | 2527.38  |
| 0.21 | 167032.54  | 647574.29   | 2104193.85  | 7786801.10   | 0.62 | 53.56  | 198.93  | 577.38  | 2024.14  |
| 0.22 | 128919.47  | 504788.94   | 1596905.45  | 6011760.95   | 0.63 | 45.00  | 161.80  | 482.97  | 1663.59  |
| 0.23 | 102728.50  | 393296.74   | 1241442.35  | 4587258.35   | 0.64 | 37.06  | 135.20  | 398.44  | 1354.28  |
| 0.24 | 79903.27   | 303177.99   | 935134.26   | 3517806.47   | 0.65 | 30.91  | 110.79  | 331.64  | 1065.62  |
| 0.25 | 62994.85   | 243527.56   | 752474.92   | 2685587.97   | 0.66 | 25.26  | 91.08   | 266.80  | 870.40   |
| 0.26 | 50216.24   | 198040.68   | 586529.92   | 2121883.37   | 0.67 | 21.04  | 73.15   | 214.57  | 692.36   |
| 0.27 | 39707.81   | 154443.24   | 463154.02   | 1655715.16   | 0.68 | 17.48  | 60.85   | 172.54  | 565.60   |
| 0.28 | 31899.01   | 120937.38   | 367733.94   | 1261197.66   | 0.69 | 14.42  | 49.69   | 138.06  | 451.89   |
| 0.29 | 25404.19   | 99399.37    | 293092.12   | 1018433.59   | 0.70 | 11.78  | 40.32   | 112.69  | 384.05   |
| 0.30 | 20476.47   | 79759.89    | 242497.58   | 854136.42    | 0.71 | 9.48   | 33.11   | 92.46   | 311.53   |
| 0.31 | 16546.36   | 66719.78    | 199110.22   | 670586.54    | 0.72 | 7.77   | 26.77   | 75.99   | 249.51   |
| 0.32 | 13515.32   | 55025.46    | 165317.59   | 554075.99    | 0.73 | 6.29   | 21.83   | 61.77   | 202.48   |
| 0.33 | 11234.80   | 44505.66    | 135936.44   | 472449.06    | 0.74 | 5.12   | 17.33   | 48.23   | 153.18   |
| 0.34 | 9145.92    | 36484.06    | 112519.40   | 390945.08    | 0.75 | 4.15   | 14.03   | 38.95   | 120.59   |
| 0.35 | 7449.33    | 30083.76    | 94162.06    | 332339.78    | 0.76 | 3.38   | 11.09   | 31.11   | 95.62    |
| 0.36 | 6203.95    | 24333.82    | 76964.35    | 276485.42    | 0.77 | 2.74   | 8.84    | 24.62   | 76.37    |
| 0.37 | 5047.59    | 19785.01    | 62975.97    | 222444.14    | 0.78 | 2.16   | 7.10    | 19.33   | 59.83    |
| 0.38 | 4174.08    | 16403.50    | 52309.02    | 183672.86    | 0.79 | 1.74   | 5.50    | 14.89   | 46.08    |
| 0.39 | 3487.13    | 13772.46    | 42980.63    | 157682.43    | 0.80 | 1.37   | 4.29    | 11.58   | 34.56    |
| 0.40 | 2910.42    | 11009.70    | 34782.07    | 136611.21    | 0.81 | 1.09   | 3.31    | 9.01    | 26.76    |
| 0.41 | 2411.51    | 9283.20     | 29207.73    | 111718.09    | 0.82 | 0.86   | 2.56    | 6.95    | 21.37    |
| 0.42 | 1998.90    | 7712.97     | 24410.08    | 90270.66     | 0.83 | 0.66   | 2.00    | 5.21    | 16.03    |
| 0.43 | 1676.02    | 6317.16     | 20210.28    | 71141.47     | 0.84 | 0.51   | 1.51    | 3.89    | 11.80    |
| 0.44 | 1397.56    | 5280.66     | 16682.84    | 59118.47     | 0.85 | 0.40   | 1.11    | 2.88    | 8.40     |
| 0.45 | 1164.21    | 4429.64     | 13935.19    | 48795.07     | 0.86 | 0.31   | 0.84    | 2.14    | 6.04     |
| 0.46 | 961.26     | 3701.98     | 11312.60    | 40675.26     | 0.87 | 0.24   | 0.61    | 1.55    | 4.21     |
| 0.47 | 801.11     | 3079.50     | 9479.13     | 33827.45     | 0.88 | 0.18   | 0.44    | 1.08    | 2.94     |
| 0.48 | 672.85     | 2572.34     | 7964.54     | 27991.84     | 0.89 | 0.14   | 0.32    | 0.75    | 2.07     |
| 0.49 | 553.71     | 2154.94     | 6562.51     | 23593.86     | 0.90 | 0.10   | 0.23    | 0.50    | 1.37     |
| 0.50 | 456.64     | 1779.32     | 5434.64     | 19732.15     |      |        |         |         |          |

Table S29: Critical values for detector  $\hat{H}^m$  and IM-OLS estimation in a model with intercept and linear trend. The number of integrated regressors is 1 and the highest power of  $x_{kt}$  is 3.

## 1.2 Number of I(1) regressors: 2

| m    | 90 %   | 95 %   | 97,5 %  | 99 %    | m    | 90 % | 95 % | 97,5 % | 99 %  |
|------|--------|--------|---------|---------|------|------|------|--------|-------|
| 0.10 | 433.44 | 773.64 | 1234.08 | 2057.33 | 0.51 | 2.59 | 4.26 | 6.31   | 10.03 |
| 0.11 | 346.84 | 607.89 | 955.83  | 1569.21 | 0.52 | 2.36 | 3.84 | 5.78   | 9.16  |
| 0.12 | 277.69 | 491.24 | 782.64  | 1286.55 | 0.53 | 2.12 | 3.45 | 5.25   | 8.31  |
| 0.13 | 226.32 | 401.59 | 638.24  | 1073.80 | 0.54 | 1.91 | 3.14 | 4.72   | 7.44  |
| 0.14 | 188.54 | 331.36 | 527.15  | 879.32  | 0.55 | 1.75 | 2.84 | 4.24   | 6.57  |
| 0.15 | 158.64 | 279.42 | 440.47  | 739.36  | 0.56 | 1.60 | 2.56 | 3.83   | 5.95  |
| 0.16 | 135.18 | 234.83 | 372.73  | 608.03  | 0.57 | 1.44 | 2.32 | 3.41   | 5.35  |
| 0.17 | 115.20 | 200.88 | 317.66  | 513.08  | 0.58 | 1.30 | 2.10 | 3.10   | 4.79  |
| 0.18 | 98.73  | 170.99 | 270.96  | 442.23  | 0.59 | 1.19 | 1.90 | 2.80   | 4.29  |
| 0.19 | 84.76  | 147.03 | 232.65  | 382.16  | 0.60 | 1.08 | 1.71 | 2.50   | 3.85  |
| 0.20 | 73.90  | 128.11 | 202.88  | 331.16  | 0.61 | 0.97 | 1.54 | 2.27   | 3.45  |
| 0.21 | 64.12  | 111.35 | 177.71  | 290.65  | 0.62 | 0.87 | 1.37 | 2.01   | 3.08  |
| 0.22 | 55.78  | 97.33  | 153.10  | 253.09  | 0.63 | 0.79 | 1.24 | 1.81   | 2.73  |
| 0.23 | 49.03  | 85.14  | 133.22  | 219.54  | 0.64 | 0.71 | 1.12 | 1.63   | 2.47  |
| 0.24 | 43.28  | 74.78  | 118.59  | 192.59  | 0.65 | 0.64 | 1.01 | 1.45   | 2.19  |
| 0.25 | 38.62  | 66.28  | 102.30  | 170.18  | 0.66 | 0.58 | 0.90 | 1.29   | 1.94  |
| 0.26 | 34.12  | 58.61  | 91.08   | 149.55  | 0.67 | 0.52 | 0.81 | 1.16   | 1.70  |
| 0.27 | 30.24  | 51.87  | 80.98   | 132.14  | 0.68 | 0.46 | 0.72 | 1.04   | 1.53  |
| 0.28 | 26.75  | 45.90  | 72.12   | 117.81  | 0.69 | 0.42 | 0.64 | 0.91   | 1.36  |
| 0.29 | 23.78  | 41.12  | 63.40   | 103.70  | 0.70 | 0.37 | 0.57 | 0.80   | 1.19  |
| 0.30 | 21.35  | 36.31  | 56.28   | 92.73   | 0.71 | 0.33 | 0.50 | 0.71   | 1.06  |
| 0.31 | 19.08  | 32.21  | 49.99   | 83.12   | 0.72 | 0.30 | 0.45 | 0.63   | 0.94  |
| 0.32 | 17.17  | 29.13  | 45.02   | 73.15   | 0.73 | 0.27 | 0.39 | 0.56   | 0.81  |
| 0.33 | 15.44  | 26.27  | 40.59   | 66.29   | 0.74 | 0.23 | 0.35 | 0.49   | 0.71  |
| 0.34 | 13.93  | 23.60  | 35.92   | 59.43   | 0.75 | 0.21 | 0.31 | 0.42   | 0.62  |
| 0.35 | 12.56  | 21.36  | 32.51   | 52.96   | 0.76 | 0.18 | 0.27 | 0.37   | 0.53  |
| 0.36 | 11.33  | 19.35  | 29.41   | 47.16   | 0.77 | 0.16 | 0.24 | 0.33   | 0.46  |
| 0.37 | 10.19  | 17.37  | 26.37   | 42.10   | 0.78 | 0.14 | 0.21 | 0.29   | 0.41  |
| 0.38 | 9.24   | 15.75  | 23.97   | 37.92   | 0.79 | 0.12 | 0.18 | 0.25   | 0.35  |
| 0.39 | 8.35   | 14.18  | 21.75   | 34.12   | 0.80 | 0.11 | 0.16 | 0.21   | 0.29  |
| 0.40 | 7.54   | 12.70  | 19.52   | 31.22   | 0.81 | 0.09 | 0.13 | 0.18   | 0.25  |
| 0.41 | 6.86   | 11.57  | 17.84   | 27.98   | 0.82 | 0.08 | 0.11 | 0.15   | 0.22  |
| 0.42 | 6.21   | 10.50  | 16.12   | 25.29   | 0.83 | 0.07 | 0.10 | 0.13   | 0.18  |
| 0.43 | 5.67   | 9.48   | 14.44   | 23.25   | 0.84 | 0.06 | 0.08 | 0.11   | 0.15  |
| 0.44 | 5.15   | 8.65   | 13.20   | 21.17   | 0.85 | 0.05 | 0.07 | 0.09   | 0.13  |
| 0.45 | 4.63   | 7.80   | 11.93   | 18.98   | 0.86 | 0.04 | 0.06 | 0.08   | 0.11  |
| 0.46 | 4.20   | 6.98   | 10.78   | 16.82   | 0.87 | 0.03 | 0.05 | 0.06   | 0.09  |
| 0.47 | 3.83   | 6.34   | 9.69    | 15.20   | 0.88 | 0.03 | 0.04 | 0.05   | 0.07  |
| 0.48 | 3.47   | 5.69   | 8.56    | 13.87   | 0.89 | 0.02 | 0.03 | 0.04   | 0.06  |
| 0.49 | 3.12   | 5.17   | 7.84    | 12.33   | 0.90 | 0.02 | 0.02 | 0.03   | 0.04  |
| 0.50 | 2.85   | 4.68   | 7.05    | 11.14   |      |      |      |        |       |

Table S30: Critical values for detector  $\hat{H}^m$  and FM-OLS and D-OLS estimation in a model with intercept. The number of integrated regressors is 2 and the highest power of  $x_{kt}$  is 1.

| m    | 90 %   | 95 %    | 97,5 %  | 99 %    | m    | 90 % | 95 % | 97,5 % | 99 %  |
|------|--------|---------|---------|---------|------|------|------|--------|-------|
| 0.10 | 877.60 | 1631.79 | 2713.03 | 4720.08 | 0.51 | 5.11 | 8.80 | 14.02  | 24.02 |
| 0.11 | 691.60 | 1270.42 | 2152.97 | 3698.68 | 0.52 | 4.64 | 7.92 | 12.70  | 21.55 |
| 0.12 | 556.92 | 1039.68 | 1723.40 | 3011.88 | 0.53 | 4.21 | 7.19 | 11.56  | 19.52 |
| 0.13 | 458.65 | 852.41  | 1424.10 | 2491.63 | 0.54 | 3.82 | 6.56 | 10.51  | 17.52 |
| 0.14 | 380.34 | 705.85  | 1183.99 | 2065.20 | 0.55 | 3.47 | 5.95 | 9.48   | 15.73 |
| 0.15 | 317.42 | 585.41  | 976.17  | 1721.15 | 0.56 | 3.14 | 5.38 | 8.44   | 14.06 |
| 0.16 | 267.32 | 495.30  | 817.57  | 1471.54 | 0.57 | 2.85 | 4.85 | 7.58   | 12.70 |
| 0.17 | 227.12 | 422.12  | 700.38  | 1216.52 | 0.58 | 2.60 | 4.39 | 6.85   | 11.45 |
| 0.18 | 194.65 | 357.83  | 591.12  | 1044.89 | 0.59 | 2.35 | 3.98 | 6.22   | 10.32 |
| 0.19 | 168.41 | 311.18  | 515.47  | 901.13  | 0.60 | 2.13 | 3.61 | 5.58   | 9.43  |
| 0.20 | 148.12 | 273.72  | 444.21  | 782.19  | 0.61 | 1.93 | 3.25 | 5.04   | 8.42  |
| 0.21 | 128.96 | 236.67  | 386.02  | 681.01  | 0.62 | 1.75 | 2.94 | 4.56   | 7.52  |
| 0.22 | 112.60 | 206.70  | 336.91  | 603.29  | 0.63 | 1.58 | 2.64 | 4.08   | 6.75  |
| 0.23 | 99.34  | 182.10  | 295.91  | 521.62  | 0.64 | 1.42 | 2.39 | 3.67   | 5.97  |
| 0.24 | 87.09  | 158.93  | 263.22  | 458.49  | 0.65 | 1.29 | 2.13 | 3.30   | 5.30  |
| 0.25 | 76.77  | 139.50  | 232.21  | 411.55  | 0.66 | 1.16 | 1.90 | 2.95   | 4.78  |
| 0.26 | 67.84  | 124.18  | 205.71  | 367.13  | 0.67 | 1.04 | 1.71 | 2.63   | 4.30  |
| 0.27 | 60.20  | 110.35  | 182.23  | 319.94  | 0.68 | 0.94 | 1.54 | 2.34   | 3.84  |
| 0.28 | 53.46  | 96.78   | 160.75  | 285.23  | 0.69 | 0.84 | 1.38 | 2.10   | 3.35  |
| 0.29 | 47.65  | 86.45   | 140.69  | 251.11  | 0.70 | 0.76 | 1.23 | 1.86   | 2.96  |
| 0.30 | 42.57  | 77.68   | 126.23  | 222.82  | 0.71 | 0.68 | 1.10 | 1.64   | 2.61  |
| 0.31 | 37.95  | 68.57   | 113.09  | 196.14  | 0.72 | 0.61 | 0.97 | 1.46   | 2.30  |
| 0.32 | 34.06  | 61.45   | 100.66  | 174.10  | 0.73 | 0.54 | 0.87 | 1.29   | 2.01  |
| 0.33 | 30.62  | 55.02   | 90.06   | 155.38  | 0.74 | 0.48 | 0.77 | 1.13   | 1.76  |
| 0.34 | 27.55  | 49.24   | 80.70   | 137.36  | 0.75 | 0.43 | 0.68 | 1.00   | 1.54  |
| 0.35 | 24.80  | 44.64   | 71.45   | 122.60  | 0.76 | 0.38 | 0.60 | 0.88   | 1.35  |
| 0.36 | 22.15  | 39.76   | 65.05   | 110.57  | 0.77 | 0.34 | 0.53 | 0.77   | 1.18  |
| 0.37 | 20.08  | 35.97   | 58.27   | 101.09  | 0.78 | 0.30 | 0.46 | 0.67   | 1.01  |
| 0.38 | 18.17  | 32.23   | 52.12   | 90.24   | 0.79 | 0.26 | 0.41 | 0.58   | 0.88  |
| 0.39 | 16.44  | 29.03   | 46.99   | 82.25   | 0.80 | 0.23 | 0.35 | 0.50   | 0.75  |
| 0.40 | 14.86  | 26.22   | 42.33   | 72.68   | 0.81 | 0.20 | 0.31 | 0.44   | 0.65  |
| 0.41 | 13.52  | 23.76   | 38.38   | 65.41   | 0.82 | 0.18 | 0.27 | 0.38   | 0.56  |
| 0.42 | 12.26  | 21.57   | 34.73   | 59.14   | 0.83 | 0.15 | 0.23 | 0.32   | 0.48  |
| 0.43 | 11.01  | 19.56   | 31.45   | 53.35   | 0.84 | 0.13 | 0.20 | 0.28   | 0.40  |
| 0.44 | 10.06  | 17.77   | 28.64   | 47.83   | 0.85 | 0.11 | 0.17 | 0.24   | 0.34  |
| 0.45 | 9.12   | 16.12   | 25.74   | 43.70   | 0.86 | 0.10 | 0.15 | 0.20   | 0.29  |
| 0.46 | 8.28   | 14.50   | 23.29   | 39.41   | 0.87 | 0.08 | 0.12 | 0.17   | 0.24  |
| 0.47 | 7.54   | 13.20   | 21.01   | 35.97   | 0.88 | 0.07 | 0.10 | 0.14   | 0.20  |
| 0.48 | 6.80   | 12.01   | 18.98   | 32.23   | 0.89 | 0.06 | 0.09 | 0.12   | 0.16  |
| 0.49 | 6.20   | 10.85   | 17.13   | 29.08   | 0.90 | 0.05 | 0.07 | 0.10   | 0.13  |
| 0.50 | 5.66   | 9.80    | 15.51   | 26.62   |      |      |      |        |       |

Table S31: Critical values for detector  $\hat{H}^m$  and IM-OLS estimation in a model with intercept. The number of integrated regressors is 2 and the highest power of  $x_{kt}$  is 1.



| m    | 90 %    | 95 %     | 97,5 %   | 99 %     | m    | 90 % | 95 %  | 97,5 % | 99 %  |
|------|---------|----------|----------|----------|------|------|-------|--------|-------|
| 0.10 | 6372.20 | 10454.22 | 15917.26 | 24897.76 | 0.51 | 7.24 | 11.48 | 16.73  | 25.54 |
| 0.11 | 4585.84 | 7508.47  | 11361.09 | 17670.65 | 0.52 | 6.44 | 10.21 | 14.95  | 23.04 |
| 0.12 | 3440.76 | 5568.91  | 8323.50  | 13106.19 | 0.53 | 5.70 | 9.05  | 13.13  | 20.01 |
| 0.13 | 2582.69 | 4221.60  | 6430.08  | 10012.76 | 0.54 | 5.05 | 8.00  | 11.69  | 17.65 |
| 0.14 | 1994.83 | 3261.60  | 4896.57  | 7747.76  | 0.55 | 4.48 | 7.07  | 10.27  | 15.95 |
| 0.15 | 1552.51 | 2547.23  | 3838.22  | 6068.02  | 0.56 | 3.97 | 6.23  | 9.16   | 13.83 |
| 0.16 | 1229.15 | 2000.51  | 3030.13  | 4724.95  | 0.57 | 3.55 | 5.56  | 8.03   | 12.34 |
| 0.17 | 993.02  | 1621.67  | 2438.46  | 3827.54  | 0.58 | 3.16 | 4.97  | 7.22   | 10.80 |
| 0.18 | 795.63  | 1323.85  | 1964.34  | 3110.36  | 0.59 | 2.80 | 4.40  | 6.25   | 9.48  |
| 0.19 | 652.55  | 1061.33  | 1599.62  | 2518.50  | 0.60 | 2.49 | 3.84  | 5.57   | 8.29  |
| 0.20 | 535.12  | 882.05   | 1323.64  | 2048.11  | 0.61 | 2.21 | 3.42  | 4.89   | 7.24  |
| 0.21 | 445.71  | 730.30   | 1091.49  | 1689.19  | 0.62 | 1.94 | 3.02  | 4.28   | 6.36  |
| 0.22 | 370.44  | 604.09   | 907.72   | 1412.46  | 0.63 | 1.72 | 2.65  | 3.82   | 5.57  |
| 0.23 | 311.18  | 514.00   | 769.18   | 1203.42  | 0.64 | 1.52 | 2.36  | 3.33   | 4.91  |
| 0.24 | 266.33  | 432.44   | 648.03   | 1008.11  | 0.65 | 1.34 | 2.06  | 2.92   | 4.33  |
| 0.25 | 224.80  | 364.34   | 542.42   | 846.94   | 0.66 | 1.19 | 1.82  | 2.60   | 3.83  |
| 0.26 | 192.69  | 310.41   | 460.69   | 720.83   | 0.67 | 1.05 | 1.61  | 2.26   | 3.37  |
| 0.27 | 163.71  | 265.69   | 392.13   | 606.37   | 0.68 | 0.92 | 1.41  | 1.99   | 2.91  |
| 0.28 | 138.92  | 226.95   | 339.95   | 532.75   | 0.69 | 0.81 | 1.24  | 1.74   | 2.55  |
| 0.29 | 120.01  | 194.42   | 293.22   | 455.83   | 0.70 | 0.71 | 1.08  | 1.52   | 2.22  |
| 0.30 | 104.05  | 169.19   | 254.50   | 396.71   | 0.71 | 0.62 | 0.94  | 1.33   | 1.92  |
| 0.31 | 90.01   | 146.46   | 219.15   | 345.29   | 0.72 | 0.54 | 0.82  | 1.16   | 1.69  |
| 0.32 | 78.28   | 127.00   | 190.54   | 299.48   | 0.73 | 0.47 | 0.71  | 1.00   | 1.45  |
| 0.33 | 68.16   | 110.41   | 166.80   | 261.72   | 0.74 | 0.41 | 0.61  | 0.86   | 1.25  |
| 0.34 | 60.01   | 97.05    | 145.61   | 229.39   | 0.75 | 0.35 | 0.53  | 0.74   | 1.06  |
| 0.35 | 52.28   | 84.70    | 126.17   | 197.34   | 0.76 | 0.31 | 0.45  | 0.63   | 0.92  |
| 0.36 | 46.03   | 73.86    | 110.81   | 172.12   | 0.77 | 0.26 | 0.39  | 0.54   | 0.78  |
| 0.37 | 40.31   | 65.21    | 97.80    | 152.66   | 0.78 | 0.23 | 0.34  | 0.46   | 0.65  |
| 0.38 | 35.43   | 56.87    | 85.82    | 134.14   | 0.79 | 0.19 | 0.28  | 0.39   | 0.54  |
| 0.39 | 31.24   | 50.15    | 74.69    | 116.82   | 0.80 | 0.16 | 0.24  | 0.32   | 0.46  |
| 0.40 | 27.53   | 44.48    | 66.31    | 102.66   | 0.81 | 0.14 | 0.20  | 0.28   | 0.39  |
| 0.41 | 24.29   | 38.96    | 57.55    | 90.27    | 0.82 | 0.12 | 0.17  | 0.23   | 0.32  |
| 0.42 | 21.56   | 34.55    | 51.64    | 80.37    | 0.83 | 0.10 | 0.14  | 0.19   | 0.27  |
| 0.43 | 19.05   | 30.67    | 45.41    | 70.84    | 0.84 | 0.08 | 0.12  | 0.16   | 0.22  |
| 0.44 | 16.91   | 27.13    | 39.70    | 62.24    | 0.85 | 0.07 | 0.10  | 0.13   | 0.18  |
| 0.45 | 14.92   | 23.97    | 35.56    | 54.92    | 0.86 | 0.06 | 0.08  | 0.11   | 0.15  |
| 0.46 | 13.17   | 21.00    | 31.15    | 48.12    | 0.87 | 0.04 | 0.06  | 0.09   | 0.12  |
| 0.47 | 11.75   | 18.69    | 27.64    | 42.31    | 0.88 | 0.04 | 0.05  | 0.07   | 0.09  |
| 0.48 | 10.38   | 16.48    | 24.33    | 36.90    | 0.89 | 0.03 | 0.04  | 0.05   | 0.07  |
| 0.49 | 9.13    | 14.52    | 21.33    | 32.69    | 0.90 | 0.02 | 0.03  | 0.04   | 0.06  |
| 0.50 | 8.18    | 13.02    | 18.97    | 28.85    |      |      |       |        |       |

Table S32: Critical values for detector  $\hat{H}^m$  and FM-OLS and D-OLS estimation in a model with intercept and linear trend. The number of integrated regressors is 2 and the highest power of  $x_{kt}$  is 1.

| m    | 90 %     | 95 %     | 97,5 %   | 99 %     | m    | 90 %  | 95 %  | 97,5 % | 99 %  |
|------|----------|----------|----------|----------|------|-------|-------|--------|-------|
| 0.10 | 12097.22 | 21054.59 | 33493.04 | 54855.31 | 0.51 | 13.98 | 23.05 | 35.47  | 57.20 |
| 0.11 | 8789.02  | 15023.02 | 23827.81 | 40461.74 | 0.52 | 12.37 | 20.53 | 31.55  | 50.51 |
| 0.12 | 6488.25  | 11029.85 | 17366.58 | 29168.13 | 0.53 | 10.98 | 18.35 | 28.05  | 43.98 |
| 0.13 | 4916.30  | 8376.62  | 12971.15 | 21191.97 | 0.54 | 9.78  | 16.25 | 24.65  | 39.29 |
| 0.14 | 3779.71  | 6486.26  | 10011.84 | 16371.05 | 0.55 | 8.65  | 14.33 | 21.73  | 34.73 |
| 0.15 | 2948.06  | 5014.49  | 7891.63  | 13106.13 | 0.56 | 7.69  | 12.71 | 19.37  | 30.88 |
| 0.16 | 2340.02  | 4001.48  | 6347.75  | 10310.34 | 0.57 | 6.78  | 11.29 | 17.21  | 27.76 |
| 0.17 | 1878.77  | 3213.10  | 5093.94  | 8352.10  | 0.58 | 6.07  | 10.04 | 15.43  | 24.50 |
| 0.18 | 1516.82  | 2603.51  | 4112.16  | 6812.76  | 0.59 | 5.39  | 8.87  | 13.69  | 21.44 |
| 0.19 | 1236.44  | 2128.71  | 3337.79  | 5635.55  | 0.60 | 4.76  | 7.88  | 12.04  | 19.05 |
| 0.20 | 1020.13  | 1743.90  | 2756.18  | 4612.81  | 0.61 | 4.24  | 6.92  | 10.55  | 16.66 |
| 0.21 | 842.38   | 1455.94  | 2296.23  | 3796.05  | 0.62 | 3.73  | 6.13  | 9.16   | 14.68 |
| 0.22 | 707.27   | 1213.72  | 1925.73  | 3160.66  | 0.63 | 3.28  | 5.40  | 8.02   | 12.78 |
| 0.23 | 595.99   | 1020.58  | 1613.78  | 2652.74  | 0.64 | 2.94  | 4.74  | 7.05   | 11.16 |
| 0.24 | 503.12   | 861.82   | 1375.52  | 2257.57  | 0.65 | 2.61  | 4.20  | 6.26   | 9.73  |
| 0.25 | 427.65   | 736.65   | 1146.06  | 1920.96  | 0.66 | 2.31  | 3.69  | 5.53   | 8.58  |
| 0.26 | 365.19   | 621.10   | 979.88   | 1589.17  | 0.67 | 2.04  | 3.26  | 4.86   | 7.50  |
| 0.27 | 308.63   | 529.11   | 831.03   | 1366.44  | 0.68 | 1.79  | 2.90  | 4.26   | 6.60  |
| 0.28 | 266.05   | 454.78   | 717.58   | 1176.18  | 0.69 | 1.58  | 2.53  | 3.72   | 5.80  |
| 0.29 | 231.34   | 391.14   | 607.42   | 999.30   | 0.70 | 1.39  | 2.22  | 3.28   | 5.06  |
| 0.30 | 199.30   | 338.60   | 524.43   | 878.46   | 0.71 | 1.22  | 1.94  | 2.86   | 4.39  |
| 0.31 | 171.17   | 293.11   | 456.82   | 769.72   | 0.72 | 1.07  | 1.69  | 2.48   | 3.83  |
| 0.32 | 149.17   | 252.98   | 398.23   | 672.99   | 0.73 | 0.93  | 1.46  | 2.16   | 3.35  |
| 0.33 | 129.78   | 222.21   | 348.78   | 579.00   | 0.74 | 0.81  | 1.27  | 1.87   | 2.88  |
| 0.34 | 113.95   | 195.63   | 302.62   | 501.52   | 0.75 | 0.70  | 1.10  | 1.62   | 2.47  |
| 0.35 | 100.06   | 171.87   | 265.47   | 438.22   | 0.76 | 0.61  | 0.95  | 1.38   | 2.09  |
| 0.36 | 87.70    | 149.56   | 233.20   | 388.86   | 0.77 | 0.53  | 0.82  | 1.17   | 1.78  |
| 0.37 | 77.27    | 131.26   | 203.69   | 336.07   | 0.78 | 0.46  | 0.70  | 1.00   | 1.51  |
| 0.38 | 67.29    | 115.13   | 180.36   | 293.89   | 0.79 | 0.39  | 0.60  | 0.85   | 1.27  |
| 0.39 | 59.00    | 101.36   | 159.16   | 263.03   | 0.80 | 0.34  | 0.51  | 0.73   | 1.08  |
| 0.40 | 52.35    | 88.73    | 139.76   | 230.46   | 0.81 | 0.29  | 0.44  | 0.61   | 0.91  |
| 0.41 | 46.24    | 78.92    | 122.21   | 201.76   | 0.82 | 0.24  | 0.37  | 0.52   | 0.76  |
| 0.42 | 40.81    | 69.09    | 107.35   | 177.67   | 0.83 | 0.21  | 0.31  | 0.44   | 0.64  |
| 0.43 | 36.04    | 61.36    | 94.80    | 157.13   | 0.84 | 0.18  | 0.26  | 0.37   | 0.53  |
| 0.44 | 32.17    | 54.16    | 83.53    | 137.64   | 0.85 | 0.15  | 0.22  | 0.31   | 0.44  |
| 0.45 | 28.48    | 48.20    | 74.19    | 122.49   | 0.86 | 0.12  | 0.18  | 0.25   | 0.36  |
| 0.46 | 25.23    | 42.29    | 65.69    | 107.09   | 0.87 | 0.10  | 0.15  | 0.21   | 0.29  |
| 0.47 | 22.26    | 37.61    | 57.55    | 94.74    | 0.88 | 0.08  | 0.12  | 0.17   | 0.24  |
| 0.48 | 19.89    | 33.12    | 51.09    | 83.74    | 0.89 | 0.07  | 0.10  | 0.13   | 0.19  |
| 0.49 | 17.64    | 29.46    | 45.75    | 73.59    | 0.90 | 0.05  | 0.08  | 0.11   | 0.15  |
| 0.50 | 15.76    | 26.08    | 40.28    | 64.63    |      |       |       |        |       |

Table S33: Critical values for detector  $\hat{H}^m$  and IM-OLS estimation in a model with intercept and linear trend. The number of integrated regressors is 2 and the highest power of  $x_{kt}$  is 1.

| m    | 90 %     | 95 %     | 97,5 %   | 99 %      | m    | 90 %  | 95 %  | 97,5 % | 99 %   |
|------|----------|----------|----------|-----------|------|-------|-------|--------|--------|
| 0.10 | 13448.63 | 34084.57 | 75630.52 | 185049.06 | 0.51 | 10.23 | 22.92 | 46.28  | 101.63 |
| 0.11 | 9664.70  | 24985.97 | 55779.84 | 134200.57 | 0.52 | 9.04  | 20.05 | 40.04  | 86.78  |
| 0.12 | 7094.32  | 18240.47 | 40328.51 | 99133.38  | 0.53 | 7.76  | 17.43 | 34.74  | 75.18  |
| 0.13 | 5283.57  | 13617.76 | 28999.71 | 72596.58  | 0.54 | 6.81  | 15.38 | 30.47  | 65.13  |
| 0.14 | 4155.55  | 10438.72 | 22944.89 | 55625.35  | 0.55 | 6.00  | 13.41 | 26.33  | 56.82  |
| 0.15 | 3234.87  | 8087.65  | 17893.30 | 43054.52  | 0.56 | 5.22  | 11.59 | 23.05  | 49.76  |
| 0.16 | 2489.48  | 6384.69  | 14116.50 | 34113.87  | 0.57 | 4.63  | 10.19 | 20.07  | 43.71  |
| 0.17 | 1965.82  | 5040.02  | 11219.65 | 27482.41  | 0.58 | 4.06  | 8.86  | 17.04  | 36.92  |
| 0.18 | 1590.70  | 3995.70  | 8978.87  | 21995.26  | 0.59 | 3.58  | 7.61  | 14.93  | 31.73  |
| 0.19 | 1280.19  | 3216.18  | 7079.58  | 17117.57  | 0.60 | 3.15  | 6.68  | 12.86  | 26.60  |
| 0.20 | 1048.52  | 2638.75  | 5745.29  | 14381.67  | 0.61 | 2.77  | 5.81  | 11.40  | 23.69  |
| 0.21 | 860.27   | 2177.86  | 4775.92  | 11646.09  | 0.62 | 2.41  | 5.06  | 9.87   | 21.07  |
| 0.22 | 712.90   | 1804.02  | 3858.78  | 9413.05   | 0.63 | 2.13  | 4.45  | 8.65   | 18.22  |
| 0.23 | 590.06   | 1497.57  | 3199.95  | 7544.25   | 0.64 | 1.87  | 3.88  | 7.39   | 16.00  |
| 0.24 | 492.27   | 1245.51  | 2646.59  | 6451.87   | 0.65 | 1.64  | 3.37  | 6.42   | 13.32  |
| 0.25 | 412.73   | 1050.19  | 2244.20  | 5354.44   | 0.66 | 1.42  | 2.88  | 5.41   | 11.24  |
| 0.26 | 349.01   | 879.48   | 1920.90  | 4504.73   | 0.67 | 1.23  | 2.48  | 4.57   | 9.65   |
| 0.27 | 297.01   | 750.37   | 1619.10  | 3834.48   | 0.68 | 1.07  | 2.15  | 3.92   | 8.21   |
| 0.28 | 249.15   | 630.52   | 1386.44  | 3301.71   | 0.69 | 0.93  | 1.86  | 3.37   | 7.12   |
| 0.29 | 215.09   | 538.88   | 1165.50  | 2739.68   | 0.70 | 0.81  | 1.57  | 2.89   | 5.86   |
| 0.30 | 183.98   | 457.53   | 985.61   | 2347.86   | 0.71 | 0.69  | 1.35  | 2.48   | 5.10   |
| 0.31 | 160.70   | 389.25   | 838.39   | 2007.82   | 0.72 | 0.61  | 1.15  | 2.08   | 4.21   |
| 0.32 | 137.37   | 331.58   | 706.99   | 1693.52   | 0.73 | 0.52  | 0.98  | 1.75   | 3.59   |
| 0.33 | 117.11   | 284.40   | 596.88   | 1372.43   | 0.74 | 0.45  | 0.83  | 1.47   | 2.84   |
| 0.34 | 100.49   | 243.59   | 512.46   | 1173.60   | 0.75 | 0.38  | 0.70  | 1.23   | 2.36   |
| 0.35 | 86.18    | 207.73   | 437.61   | 1014.80   | 0.76 | 0.33  | 0.59  | 1.03   | 1.99   |
| 0.36 | 75.04    | 182.12   | 381.03   | 865.02    | 0.77 | 0.28  | 0.49  | 0.85   | 1.68   |
| 0.37 | 65.92    | 156.59   | 334.09   | 746.27    | 0.78 | 0.24  | 0.42  | 0.71   | 1.34   |
| 0.38 | 56.89    | 137.41   | 291.79   | 654.56    | 0.79 | 0.20  | 0.35  | 0.59   | 1.10   |
| 0.39 | 50.06    | 118.40   | 249.42   | 568.43    | 0.80 | 0.17  | 0.29  | 0.48   | 0.88   |
| 0.40 | 43.59    | 103.60   | 216.95   | 500.24    | 0.81 | 0.15  | 0.24  | 0.39   | 0.71   |
| 0.41 | 37.77    | 90.09    | 189.98   | 447.13    | 0.82 | 0.12  | 0.20  | 0.32   | 0.57   |
| 0.42 | 33.36    | 77.88    | 161.84   | 374.30    | 0.83 | 0.10  | 0.17  | 0.26   | 0.46   |
| 0.43 | 28.92    | 68.09    | 140.05   | 324.93    | 0.84 | 0.08  | 0.14  | 0.21   | 0.36   |
| 0.44 | 25.74    | 59.91    | 121.56   | 280.59    | 0.85 | 0.07  | 0.11  | 0.17   | 0.28   |
| 0.45 | 22.49    | 51.80    | 105.54   | 240.00    | 0.86 | 0.06  | 0.09  | 0.13   | 0.22   |
| 0.46 | 19.68    | 45.44    | 92.41    | 210.22    | 0.87 | 0.05  | 0.07  | 0.11   | 0.17   |
| 0.47 | 17.38    | 39.86    | 81.65    | 185.79    | 0.88 | 0.04  | 0.06  | 0.08   | 0.13   |
| 0.48 | 15.25    | 34.73    | 71.62    | 160.15    | 0.89 | 0.03  | 0.04  | 0.06   | 0.10   |
| 0.49 | 13.28    | 30.18    | 61.11    | 135.32    | 0.90 | 0.02  | 0.03  | 0.05   | 0.07   |
| 0.50 | 11.64    | 26.36    | 52.55    | 114.67    |      |       |       |        |        |

Table S34: Critical values for detector  $\hat{H}^m$  and FM-OLS and D-OLS estimation in a model with intercept. The number of integrated regressors is 2 and the highest power of  $x_{kt}$  is 2.

| m    | 90 %     | 95 %      | 97,5 %    | 99 %      | m    | 90 %  | 95 %  | 97,5 % | 99 %   |
|------|----------|-----------|-----------|-----------|------|-------|-------|--------|--------|
| 0.10 | 36366.73 | 100046.53 | 237969.03 | 624407.39 | 0.51 | 26.43 | 67.14 | 145.45 | 350.42 |
| 0.11 | 26224.00 | 72333.09  | 168520.97 | 460662.91 | 0.52 | 23.34 | 58.34 | 125.77 | 303.17 |
| 0.12 | 19218.79 | 53089.58  | 123653.56 | 325505.20 | 0.53 | 20.45 | 49.63 | 110.86 | 262.31 |
| 0.13 | 14329.99 | 39426.71  | 92513.96  | 238338.75 | 0.54 | 17.72 | 43.23 | 95.77  | 228.54 |
| 0.14 | 10905.47 | 29959.21  | 69868.27  | 182171.36 | 0.55 | 15.47 | 37.93 | 83.25  | 195.44 |
| 0.15 | 8450.38  | 23299.88  | 53816.26  | 138189.84 | 0.56 | 13.63 | 33.07 | 71.61  | 170.63 |
| 0.16 | 6699.35  | 18332.39  | 43261.65  | 112133.36 | 0.57 | 11.99 | 29.23 | 63.05  | 147.18 |
| 0.17 | 5293.64  | 14500.65  | 33735.27  | 87899.54  | 0.58 | 10.53 | 25.14 | 54.17  | 130.01 |
| 0.18 | 4192.93  | 11535.78  | 26732.37  | 73140.08  | 0.59 | 9.20  | 21.94 | 46.77  | 113.93 |
| 0.19 | 3411.30  | 9281.47   | 21334.15  | 57626.46  | 0.60 | 8.10  | 19.01 | 40.16  | 98.43  |
| 0.20 | 2796.02  | 7690.11   | 17615.56  | 46739.20  | 0.61 | 7.00  | 16.44 | 34.73  | 84.06  |
| 0.21 | 2296.85  | 6276.41   | 14635.49  | 38133.92  | 0.62 | 6.11  | 14.26 | 30.26  | 71.05  |
| 0.22 | 1878.79  | 5206.85   | 12213.41  | 29925.84  | 0.63 | 5.34  | 12.46 | 26.24  | 61.49  |
| 0.23 | 1589.58  | 4183.97   | 9866.64   | 25287.71  | 0.64 | 4.68  | 10.75 | 22.72  | 51.79  |
| 0.24 | 1315.42  | 3483.02   | 8049.44   | 21570.04  | 0.65 | 4.09  | 9.18  | 19.22  | 43.49  |
| 0.25 | 1101.21  | 2976.20   | 6761.11   | 17531.67  | 0.66 | 3.57  | 7.89  | 16.37  | 36.61  |
| 0.26 | 926.41   | 2498.79   | 5848.16   | 14609.62  | 0.67 | 3.07  | 6.82  | 13.83  | 31.43  |
| 0.27 | 789.03   | 2119.25   | 4921.31   | 12302.08  | 0.68 | 2.68  | 5.85  | 11.85  | 26.99  |
| 0.28 | 671.21   | 1812.61   | 4213.52   | 10489.15  | 0.69 | 2.34  | 5.04  | 10.08  | 23.03  |
| 0.29 | 571.58   | 1559.89   | 3575.11   | 9080.37   | 0.70 | 2.04  | 4.34  | 8.51   | 19.89  |
| 0.30 | 490.21   | 1326.94   | 3035.18   | 7767.78   | 0.71 | 1.75  | 3.73  | 7.37   | 15.94  |
| 0.31 | 415.40   | 1131.95   | 2606.14   | 6501.96   | 0.72 | 1.51  | 3.19  | 6.26   | 13.58  |
| 0.32 | 359.37   | 963.63    | 2217.11   | 5576.19   | 0.73 | 1.30  | 2.71  | 5.22   | 11.33  |
| 0.33 | 306.60   | 820.03    | 1852.76   | 4793.18   | 0.74 | 1.11  | 2.31  | 4.49   | 9.53   |
| 0.34 | 265.70   | 697.83    | 1572.38   | 4064.39   | 0.75 | 0.95  | 1.96  | 3.81   | 8.13   |
| 0.35 | 227.99   | 611.57    | 1351.03   | 3359.81   | 0.76 | 0.82  | 1.68  | 3.18   | 6.80   |
| 0.36 | 195.94   | 540.48    | 1203.11   | 2957.42   | 0.77 | 0.70  | 1.42  | 2.67   | 5.68   |
| 0.37 | 171.20   | 456.11    | 1044.96   | 2635.79   | 0.78 | 0.59  | 1.19  | 2.23   | 4.75   |
| 0.38 | 148.44   | 392.14    | 904.32    | 2276.79   | 0.79 | 0.50  | 1.00  | 1.85   | 3.84   |
| 0.39 | 130.26   | 341.30    | 792.45    | 1958.52   | 0.80 | 0.43  | 0.82  | 1.54   | 3.09   |
| 0.40 | 114.13   | 298.96    | 692.41    | 1698.09   | 0.81 | 0.36  | 0.68  | 1.25   | 2.49   |
| 0.41 | 100.39   | 258.58    | 594.85    | 1512.82   | 0.82 | 0.30  | 0.56  | 1.00   | 2.04   |
| 0.42 | 88.00    | 226.87    | 520.22    | 1268.42   | 0.83 | 0.25  | 0.46  | 0.80   | 1.63   |
| 0.43 | 76.49    | 196.71    | 457.98    | 1123.42   | 0.84 | 0.21  | 0.38  | 0.65   | 1.28   |
| 0.44 | 66.46    | 171.71    | 390.33    | 1011.91   | 0.85 | 0.17  | 0.31  | 0.52   | 1.01   |
| 0.45 | 58.36    | 149.87    | 338.07    | 850.15    | 0.86 | 0.14  | 0.25  | 0.41   | 0.79   |
| 0.46 | 50.86    | 129.51    | 291.36    | 718.51    | 0.87 | 0.12  | 0.20  | 0.33   | 0.61   |
| 0.47 | 44.31    | 113.49    | 251.87    | 602.63    | 0.88 | 0.10  | 0.16  | 0.26   | 0.47   |
| 0.48 | 38.86    | 99.12     | 219.68    | 530.70    | 0.89 | 0.08  | 0.13  | 0.20   | 0.35   |
| 0.49 | 34.27    | 86.28     | 191.50    | 469.46    | 0.90 | 0.06  | 0.10  | 0.15   | 0.27   |
| 0.50 | 29.94    | 76.10     | 166.62    | 403.93    |      |       |       |        |        |

Table S35: Critical values for detector  $\hat{H}^m$  and IM-OLS estimation in a model with intercept. The number of integrated regressors is 2 and the highest power of  $x_{kt}$  is 2.

| m    | 90 %     | 95 %     | 97,5 %    | 99 %      | m    | 90 %  | 95 %  | 97,5 % | 99 %   |
|------|----------|----------|-----------|-----------|------|-------|-------|--------|--------|
| 0.10 | 26903.37 | 56545.85 | 112284.54 | 249096.38 | 0.51 | 16.52 | 31.23 | 56.14  | 111.99 |
| 0.11 | 18979.88 | 39974.60 | 78797.77  | 179191.61 | 0.52 | 14.55 | 27.11 | 48.82  | 96.97  |
| 0.12 | 13722.54 | 28629.90 | 57376.98  | 125828.41 | 0.53 | 12.63 | 23.50 | 42.04  | 83.55  |
| 0.13 | 10051.35 | 20756.45 | 40414.24  | 92514.96  | 0.54 | 11.17 | 20.58 | 36.63  | 75.08  |
| 0.14 | 7752.31  | 15769.36 | 31027.19  | 70055.56  | 0.55 | 9.72  | 17.90 | 31.94  | 64.63  |
| 0.15 | 5937.60  | 12058.88 | 23734.97  | 53145.26  | 0.56 | 8.51  | 15.57 | 27.70  | 56.00  |
| 0.16 | 4586.22  | 9369.48  | 18384.01  | 41923.80  | 0.57 | 7.50  | 13.76 | 24.00  | 47.91  |
| 0.17 | 3591.48  | 7348.23  | 14494.90  | 33551.78  | 0.58 | 6.57  | 12.05 | 20.61  | 41.94  |
| 0.18 | 2887.53  | 5805.23  | 11326.54  | 26634.52  | 0.59 | 5.70  | 10.42 | 18.04  | 36.02  |
| 0.19 | 2305.57  | 4649.25  | 8929.84   | 20684.97  | 0.60 | 5.03  | 8.99  | 15.71  | 30.82  |
| 0.20 | 1855.90  | 3770.26  | 7373.91   | 16812.51  | 0.61 | 4.41  | 8.02  | 13.65  | 27.00  |
| 0.21 | 1523.34  | 3047.45  | 5928.49   | 13571.79  | 0.62 | 3.86  | 6.89  | 11.91  | 23.49  |
| 0.22 | 1246.97  | 2490.58  | 4868.79   | 10943.56  | 0.63 | 3.38  | 6.04  | 10.39  | 20.66  |
| 0.23 | 1035.15  | 2080.53  | 4019.30   | 8749.63   | 0.64 | 2.95  | 5.22  | 9.01   | 17.63  |
| 0.24 | 863.27   | 1741.81  | 3301.64   | 7312.41   | 0.65 | 2.58  | 4.52  | 7.71   | 14.83  |
| 0.25 | 719.14   | 1441.59  | 2762.61   | 6041.96   | 0.66 | 2.23  | 3.87  | 6.56   | 12.35  |
| 0.26 | 600.97   | 1214.72  | 2364.80   | 5023.22   | 0.67 | 1.93  | 3.39  | 5.63   | 10.89  |
| 0.27 | 510.28   | 1040.05  | 1972.18   | 4356.12   | 0.68 | 1.68  | 2.92  | 4.84   | 9.33   |
| 0.28 | 430.02   | 881.36   | 1678.85   | 3666.63   | 0.69 | 1.45  | 2.52  | 4.19   | 8.16   |
| 0.29 | 370.33   | 738.44   | 1411.35   | 3033.77   | 0.70 | 1.24  | 2.14  | 3.60   | 6.64   |
| 0.30 | 313.28   | 633.42   | 1197.89   | 2572.20   | 0.71 | 1.08  | 1.84  | 3.04   | 5.70   |
| 0.31 | 270.83   | 534.68   | 1007.89   | 2225.91   | 0.72 | 0.92  | 1.58  | 2.58   | 4.68   |
| 0.32 | 231.86   | 456.19   | 847.46    | 1864.41   | 0.73 | 0.79  | 1.34  | 2.19   | 4.08   |
| 0.33 | 197.15   | 388.72   | 726.48    | 1525.41   | 0.74 | 0.68  | 1.14  | 1.82   | 3.32   |
| 0.34 | 171.80   | 334.21   | 614.07    | 1303.25   | 0.75 | 0.57  | 0.95  | 1.52   | 2.74   |
| 0.35 | 147.04   | 288.64   | 530.48    | 1128.64   | 0.76 | 0.48  | 0.81  | 1.28   | 2.29   |
| 0.36 | 126.65   | 249.49   | 460.52    | 968.78    | 0.77 | 0.41  | 0.67  | 1.08   | 1.92   |
| 0.37 | 110.01   | 215.02   | 406.71    | 847.16    | 0.78 | 0.35  | 0.57  | 0.89   | 1.54   |
| 0.38 | 95.45    | 188.39   | 355.33    | 744.89    | 0.79 | 0.29  | 0.48  | 0.73   | 1.27   |
| 0.39 | 83.07    | 160.90   | 303.26    | 635.06    | 0.80 | 0.24  | 0.39  | 0.60   | 1.03   |
| 0.40 | 72.47    | 140.08   | 263.72    | 549.77    | 0.81 | 0.20  | 0.32  | 0.49   | 0.81   |
| 0.41 | 62.90    | 122.71   | 226.76    | 491.58    | 0.82 | 0.17  | 0.27  | 0.40   | 0.65   |
| 0.42 | 54.97    | 106.41   | 194.52    | 417.97    | 0.83 | 0.14  | 0.22  | 0.32   | 0.52   |
| 0.43 | 48.29    | 93.52    | 169.05    | 367.29    | 0.84 | 0.11  | 0.18  | 0.26   | 0.42   |
| 0.44 | 42.44    | 80.92    | 147.29    | 320.05    | 0.85 | 0.09  | 0.14  | 0.20   | 0.33   |
| 0.45 | 37.16    | 69.99    | 126.37    | 272.33    | 0.86 | 0.07  | 0.11  | 0.16   | 0.25   |
| 0.46 | 32.22    | 61.02    | 111.18    | 234.35    | 0.87 | 0.06  | 0.09  | 0.13   | 0.20   |
| 0.47 | 28.11    | 54.01    | 97.94     | 210.70    | 0.88 | 0.05  | 0.07  | 0.10   | 0.15   |
| 0.48 | 24.68    | 47.13    | 85.74     | 175.92    | 0.89 | 0.04  | 0.05  | 0.07   | 0.11   |
| 0.49 | 21.60    | 40.72    | 73.01     | 152.46    | 0.90 | 0.03  | 0.04  | 0.06   | 0.08   |
| 0.50 | 18.92    | 35.59    | 63.55     | 130.42    |      |       |       |        |        |

Table S36: Critical values for detector  $\hat{H}^m$  and FM-OLS and D-OLS estimation in a model with intercept and linear trend. The number of integrated regressors is 2 and the highest power of  $x_{kt}$  is 2.

| m    | 90 %     | 95 %      | 97,5 %    | 99 %      | m    | 90 %  | 95 %  | 97,5 % | 99 %   |
|------|----------|-----------|-----------|-----------|------|-------|-------|--------|--------|
| 0.10 | 63802.12 | 144686.27 | 302256.51 | 713677.79 | 0.51 | 37.26 | 77.07 | 148.14 | 321.29 |
| 0.11 | 44418.88 | 99499.72  | 210877.75 | 502918.32 | 0.52 | 32.78 | 66.57 | 129.38 | 283.71 |
| 0.12 | 31752.62 | 71823.41  | 151329.92 | 363790.38 | 0.53 | 28.70 | 57.72 | 113.54 | 248.65 |
| 0.13 | 23475.56 | 53012.62  | 110543.40 | 261528.79 | 0.54 | 24.83 | 50.50 | 97.57  | 215.95 |
| 0.14 | 17583.32 | 39414.06  | 82163.47  | 193384.86 | 0.55 | 21.87 | 43.74 | 84.82  | 187.12 |
| 0.15 | 13588.48 | 30516.64  | 63195.68  | 151066.07 | 0.56 | 19.11 | 37.78 | 72.24  | 161.24 |
| 0.16 | 10560.82 | 23557.56  | 49746.06  | 117308.52 | 0.57 | 16.75 | 32.91 | 62.86  | 141.56 |
| 0.17 | 8267.48  | 18385.19  | 38933.24  | 94895.92  | 0.58 | 14.48 | 28.93 | 54.54  | 122.46 |
| 0.18 | 6595.57  | 14482.94  | 30624.94  | 75873.60  | 0.59 | 12.72 | 25.25 | 47.21  | 106.94 |
| 0.19 | 5355.09  | 11660.71  | 23853.23  | 60855.24  | 0.60 | 11.15 | 22.05 | 40.85  | 91.78  |
| 0.20 | 4364.30  | 9470.84   | 19600.42  | 49253.06  | 0.61 | 9.70  | 19.42 | 35.83  | 77.67  |
| 0.21 | 3551.04  | 7817.86   | 15905.34  | 39588.85  | 0.62 | 8.52  | 16.70 | 31.08  | 67.46  |
| 0.22 | 2876.42  | 6392.47   | 13156.67  | 31390.28  | 0.63 | 7.42  | 14.50 | 26.86  | 58.49  |
| 0.23 | 2383.86  | 5267.83   | 10782.75  | 24702.14  | 0.64 | 6.48  | 12.57 | 23.23  | 50.00  |
| 0.24 | 1976.18  | 4283.59   | 8992.10   | 21156.95  | 0.65 | 5.65  | 10.71 | 20.11  | 43.49  |
| 0.25 | 1662.64  | 3616.08   | 7367.39   | 17228.11  | 0.66 | 4.91  | 9.32  | 17.00  | 36.77  |
| 0.26 | 1386.73  | 3054.98   | 6263.64   | 14763.00  | 0.67 | 4.23  | 7.98  | 14.68  | 30.77  |
| 0.27 | 1170.55  | 2593.36   | 5281.34   | 12509.17  | 0.68 | 3.65  | 6.84  | 12.35  | 26.28  |
| 0.28 | 985.23   | 2172.82   | 4415.45   | 10552.24  | 0.69 | 3.16  | 5.90  | 10.50  | 22.27  |
| 0.29 | 831.94   | 1816.57   | 3705.52   | 8765.17   | 0.70 | 2.74  | 5.06  | 9.10   | 18.52  |
| 0.30 | 713.08   | 1540.64   | 3106.85   | 7213.30   | 0.71 | 2.36  | 4.35  | 7.76   | 15.61  |
| 0.31 | 606.32   | 1312.92   | 2650.82   | 6107.37   | 0.72 | 2.02  | 3.75  | 6.65   | 13.19  |
| 0.32 | 520.29   | 1104.14   | 2225.10   | 5315.02   | 0.73 | 1.74  | 3.20  | 5.70   | 11.29  |
| 0.33 | 447.05   | 955.32    | 1945.58   | 4511.35   | 0.74 | 1.49  | 2.72  | 4.89   | 9.42   |
| 0.34 | 384.60   | 812.88    | 1653.69   | 3888.00   | 0.75 | 1.27  | 2.30  | 4.09   | 8.13   |
| 0.35 | 332.37   | 707.13    | 1436.25   | 3354.04   | 0.76 | 1.08  | 1.96  | 3.40   | 6.72   |
| 0.36 | 285.34   | 617.45    | 1257.61   | 2910.62   | 0.77 | 0.92  | 1.64  | 2.78   | 5.62   |
| 0.37 | 248.70   | 528.47    | 1085.17   | 2530.80   | 0.78 | 0.77  | 1.37  | 2.34   | 4.64   |
| 0.38 | 216.72   | 457.25    | 929.08    | 2140.56   | 0.79 | 0.65  | 1.15  | 1.94   | 3.74   |
| 0.39 | 187.90   | 393.44    | 818.89    | 1891.90   | 0.80 | 0.55  | 0.95  | 1.58   | 2.98   |
| 0.40 | 164.74   | 345.02    | 712.38    | 1633.12   | 0.81 | 0.45  | 0.78  | 1.29   | 2.39   |
| 0.41 | 143.15   | 302.98    | 610.83    | 1410.43   | 0.82 | 0.38  | 0.64  | 1.04   | 1.93   |
| 0.42 | 124.89   | 258.77    | 525.44    | 1200.94   | 0.83 | 0.31  | 0.53  | 0.84   | 1.54   |
| 0.43 | 108.22   | 222.82    | 453.93    | 1051.32   | 0.84 | 0.26  | 0.43  | 0.68   | 1.23   |
| 0.44 | 94.84    | 198.07    | 391.24    | 893.88    | 0.85 | 0.21  | 0.35  | 0.55   | 0.97   |
| 0.45 | 83.31    | 173.20    | 342.64    | 767.47    | 0.86 | 0.17  | 0.28  | 0.43   | 0.75   |
| 0.46 | 72.66    | 151.22    | 294.71    | 662.52    | 0.87 | 0.14  | 0.22  | 0.34   | 0.59   |
| 0.47 | 63.43    | 131.57    | 255.39    | 571.07    | 0.88 | 0.11  | 0.18  | 0.27   | 0.45   |
| 0.48 | 55.37    | 115.00    | 223.01    | 497.44    | 0.89 | 0.09  | 0.14  | 0.21   | 0.34   |
| 0.49 | 48.50    | 100.52    | 195.84    | 437.62    | 0.90 | 0.07  | 0.11  | 0.16   | 0.25   |
| 0.50 | 42.48    | 88.20     | 171.13    | 380.43    |      |       |       |        |        |

Table S37: Critical values for detector  $\hat{H}^m$  and IM-OLS estimation in a model with intercept and linear trend. The number of integrated regressors is 2 and the highest power of  $x_{kt}$  is 2.

| m    | 90 %       | 95 %       | 97,5 %      | 99 %        | m    | 90 %   | 95 %   | 97,5 %  | 99 %    |
|------|------------|------------|-------------|-------------|------|--------|--------|---------|---------|
| 0.10 | 1398233.43 | 5042437.34 | 14602998.13 | 48219721.36 | 0.51 | 103.19 | 360.03 | 1006.06 | 2938.80 |
| 0.11 | 893809.36  | 3172559.68 | 9359110.75  | 30921507.99 | 0.52 | 87.02  | 302.07 | 827.12  | 2499.67 |
| 0.12 | 604036.88  | 2188205.69 | 6228731.09  | 20686075.50 | 0.53 | 71.88  | 250.47 | 680.07  | 2064.57 |
| 0.13 | 413395.34  | 1507470.34 | 4389922.92  | 13892561.28 | 0.54 | 59.89  | 211.80 | 571.42  | 1705.55 |
| 0.14 | 287800.37  | 1063860.68 | 3191735.73  | 9715417.12  | 0.55 | 50.30  | 174.57 | 472.11  | 1422.05 |
| 0.15 | 204302.86  | 778004.80  | 2251393.65  | 7084745.77  | 0.56 | 42.15  | 149.91 | 412.15  | 1175.01 |
| 0.16 | 145419.78  | 545667.95  | 1602710.68  | 5441824.77  | 0.57 | 35.04  | 121.77 | 331.33  | 975.04  |
| 0.17 | 110215.29  | 392724.90  | 1147146.58  | 4029134.76  | 0.58 | 29.31  | 100.24 | 279.78  | 823.16  |
| 0.18 | 81558.90   | 293898.69  | 885306.76   | 3018805.97  | 0.59 | 24.16  | 83.85  | 228.29  | 699.76  |
| 0.19 | 61301.64   | 226527.86  | 659885.38   | 2279744.67  | 0.60 | 20.35  | 69.38  | 191.82  | 595.63  |
| 0.20 | 47277.38   | 175093.33  | 511981.35   | 1775121.73  | 0.61 | 17.42  | 59.24  | 162.05  | 482.71  |
| 0.21 | 36039.21   | 133557.29  | 389798.33   | 1348634.40  | 0.62 | 14.33  | 48.45  | 132.90  | 406.29  |
| 0.22 | 27766.33   | 103236.70  | 301388.03   | 980519.95   | 0.63 | 12.07  | 41.06  | 110.84  | 338.21  |
| 0.23 | 22523.38   | 81909.92   | 237238.75   | 766432.75   | 0.64 | 9.87   | 33.10  | 88.36   | 273.26  |
| 0.24 | 17276.15   | 64751.94   | 189158.26   | 610221.81   | 0.65 | 8.19   | 27.27  | 72.84   | 217.33  |
| 0.25 | 13793.71   | 50348.07   | 145020.54   | 483394.88   | 0.66 | 6.80   | 22.06  | 59.04   | 173.19  |
| 0.26 | 11004.64   | 40777.36   | 118480.48   | 382446.78   | 0.67 | 5.61   | 18.38  | 48.64   | 142.64  |
| 0.27 | 9085.71    | 32530.11   | 95370.26    | 302107.57   | 0.68 | 4.71   | 14.83  | 39.00   | 117.93  |
| 0.28 | 7097.44    | 26798.07   | 75150.16    | 246035.18   | 0.69 | 3.93   | 12.14  | 32.05   | 93.43   |
| 0.29 | 5732.47    | 20955.13   | 60831.28    | 197507.28   | 0.70 | 3.20   | 9.90   | 25.93   | 74.85   |
| 0.30 | 4683.12    | 16813.65   | 48543.70    | 158323.23   | 0.71 | 2.65   | 8.36   | 21.28   | 61.90   |
| 0.31 | 3853.38    | 13911.21   | 40399.97    | 132502.62   | 0.72 | 2.23   | 6.93   | 17.27   | 50.05   |
| 0.32 | 3143.73    | 11245.04   | 33041.63    | 110614.52   | 0.73 | 1.80   | 5.47   | 13.89   | 39.58   |
| 0.33 | 2607.67    | 9233.91    | 26871.63    | 89264.49    | 0.74 | 1.48   | 4.37   | 10.97   | 31.81   |
| 0.34 | 2152.97    | 7494.86    | 22153.18    | 75353.30    | 0.75 | 1.19   | 3.55   | 8.83    | 23.77   |
| 0.35 | 1799.55    | 6289.01    | 18203.77    | 61033.65    | 0.76 | 0.96   | 2.80   | 7.05    | 19.16   |
| 0.36 | 1479.89    | 5203.94    | 14685.16    | 48530.08    | 0.77 | 0.78   | 2.28   | 5.58    | 15.00   |
| 0.37 | 1224.53    | 4288.48    | 12097.06    | 38151.68    | 0.78 | 0.63   | 1.79   | 4.47    | 12.23   |
| 0.38 | 1021.52    | 3590.70    | 10363.70    | 33167.15    | 0.79 | 0.50   | 1.41   | 3.33    | 8.94    |
| 0.39 | 855.86     | 2979.38    | 8582.06     | 26640.76    | 0.80 | 0.39   | 1.08   | 2.61    | 6.73    |
| 0.40 | 709.19     | 2518.86    | 6937.76     | 22464.54    | 0.81 | 0.32   | 0.83   | 1.97    | 5.11    |
| 0.41 | 587.14     | 2100.90    | 5765.23     | 18429.77    | 0.82 | 0.25   | 0.65   | 1.53    | 3.93    |
| 0.42 | 490.60     | 1748.47    | 4806.86     | 15835.89    | 0.83 | 0.20   | 0.50   | 1.14    | 2.85    |
| 0.43 | 410.57     | 1452.37    | 3957.25     | 12995.42    | 0.84 | 0.15   | 0.37   | 0.84    | 2.06    |
| 0.44 | 343.20     | 1204.56    | 3338.49     | 10764.10    | 0.85 | 0.12   | 0.28   | 0.62    | 1.48    |
| 0.45 | 290.30     | 1017.68    | 2824.06     | 9115.80     | 0.86 | 0.09   | 0.21   | 0.44    | 1.06    |
| 0.46 | 246.07     | 855.27     | 2424.49     | 7458.05     | 0.87 | 0.07   | 0.15   | 0.33    | 0.77    |
| 0.47 | 206.74     | 722.14     | 2057.80     | 6486.52     | 0.88 | 0.05   | 0.11   | 0.23    | 0.52    |
| 0.48 | 174.39     | 606.83     | 1725.40     | 5310.52     | 0.89 | 0.04   | 0.08   | 0.15    | 0.36    |
| 0.49 | 143.31     | 494.13     | 1400.33     | 4374.64     | 0.90 | 0.03   | 0.06   | 0.10    | 0.24    |
| 0.50 | 120.13     | 419.14     | 1185.73     | 3560.02     |      |        |        |         |         |

Table S38: Critical values for detector  $\hat{H}^m$  and FM-OLS and D-OLS estimation in a model with intercept. The number of integrated regressors is 2 and the highest power of  $x_{kt}$  is 3.

| m    | 90 %       | 95 %        | 97,5 %      | 99 %         | m    | 90 %   | 95 %    | 97,5 %  | 99 %     |
|------|------------|-------------|-------------|--------------|------|--------|---------|---------|----------|
| 0.10 | 5612969.94 | 22493726.64 | 69794426.03 | 255122716.48 | 0.51 | 395.83 | 1566.59 | 4793.60 | 16426.03 |
| 0.11 | 3641270.09 | 14339891.57 | 45820176.52 | 159598562.07 | 0.52 | 334.13 | 1325.10 | 3950.35 | 13448.65 |
| 0.12 | 2445413.57 | 9385777.07  | 29455595.25 | 107420236.75 | 0.53 | 280.93 | 1077.74 | 3256.91 | 11559.66 |
| 0.13 | 1646084.69 | 6352894.66  | 19508647.62 | 73507369.40  | 0.54 | 237.08 | 893.67  | 2735.19 | 9573.52  |
| 0.14 | 1119785.40 | 4484786.26  | 13904629.59 | 51530335.02  | 0.55 | 200.08 | 770.36  | 2297.55 | 8245.77  |
| 0.15 | 799718.96  | 3167349.91  | 10121164.15 | 37154725.43  | 0.56 | 165.97 | 628.37  | 1896.44 | 6701.22  |
| 0.16 | 583293.95  | 2305555.76  | 7232099.28  | 26076933.57  | 0.57 | 138.30 | 530.06  | 1583.54 | 5591.67  |
| 0.17 | 433036.08  | 1684749.81  | 5273780.55  | 19524589.21  | 0.58 | 116.91 | 443.30  | 1315.78 | 4759.03  |
| 0.18 | 325704.11  | 1272121.52  | 4110107.18  | 14765367.44  | 0.59 | 96.46  | 364.72  | 1106.31 | 4018.44  |
| 0.19 | 249404.70  | 981534.01   | 3041411.09  | 11291894.40  | 0.60 | 79.70  | 302.29  | 931.20  | 3194.55  |
| 0.20 | 189718.26  | 763526.63   | 2358215.38  | 8761001.80   | 0.61 | 65.71  | 254.21  | 766.58  | 2587.04  |
| 0.21 | 145905.57  | 572495.22   | 1796262.05  | 6804273.94   | 0.62 | 55.13  | 212.69  | 628.69  | 2103.24  |
| 0.22 | 112893.73  | 446836.72   | 1411355.72  | 5211503.24   | 0.63 | 46.49  | 174.21  | 519.30  | 1713.49  |
| 0.23 | 87032.33   | 345081.46   | 1068845.31  | 4072248.93   | 0.64 | 38.68  | 144.08  | 427.22  | 1429.66  |
| 0.24 | 69003.93   | 273131.20   | 864761.87   | 3145941.82   | 0.65 | 32.01  | 117.85  | 346.61  | 1128.32  |
| 0.25 | 55951.14   | 220279.89   | 701501.87   | 2459257.15   | 0.66 | 26.69  | 95.51   | 280.73  | 929.89   |
| 0.26 | 44367.09   | 177324.17   | 554908.11   | 1982358.49   | 0.67 | 22.03  | 79.61   | 231.03  | 733.70   |
| 0.27 | 35190.40   | 142992.35   | 446025.42   | 1630381.20   | 0.68 | 18.14  | 65.07   | 187.83  | 595.74   |
| 0.28 | 28200.31   | 113895.42   | 352860.07   | 1330536.05   | 0.69 | 14.90  | 52.39   | 153.23  | 490.14   |
| 0.29 | 22527.78   | 91845.41    | 287951.76   | 1063400.30   | 0.70 | 12.01  | 42.35   | 123.65  | 394.20   |
| 0.30 | 18590.07   | 74786.30    | 231986.17   | 862960.54    | 0.71 | 9.84   | 34.65   | 98.24   | 314.67   |
| 0.31 | 15179.05   | 59912.08    | 182498.42   | 701218.82    | 0.72 | 8.14   | 28.17   | 81.91   | 257.49   |
| 0.32 | 12617.59   | 49317.56    | 153180.64   | 576108.78    | 0.73 | 6.61   | 22.90   | 65.20   | 205.92   |
| 0.33 | 10378.75   | 39970.12    | 128873.87   | 466743.15    | 0.74 | 5.38   | 18.41   | 51.51   | 161.78   |
| 0.34 | 8485.49    | 33723.10    | 106032.51   | 391767.92    | 0.75 | 4.36   | 14.71   | 40.67   | 125.92   |
| 0.35 | 7022.97    | 28064.99    | 87175.32    | 315484.35    | 0.76 | 3.48   | 11.74   | 32.58   | 100.09   |
| 0.36 | 5821.90    | 22933.96    | 71400.96    | 247075.68    | 0.77 | 2.79   | 9.20    | 25.45   | 77.65    |
| 0.37 | 4830.85    | 19162.10    | 58623.02    | 196443.13    | 0.78 | 2.23   | 7.25    | 19.80   | 61.32    |
| 0.38 | 4016.89    | 15828.93    | 48720.12    | 160919.13    | 0.79 | 1.77   | 5.71    | 15.34   | 48.36    |
| 0.39 | 3357.57    | 13171.59    | 39716.95    | 134116.36    | 0.80 | 1.39   | 4.47    | 12.00   | 35.13    |
| 0.40 | 2808.97    | 10909.47    | 32449.30    | 111280.79    | 0.81 | 1.08   | 3.44    | 9.11    | 27.42    |
| 0.41 | 2306.35    | 9172.77     | 26866.45    | 93650.95     | 0.82 | 0.85   | 2.65    | 6.87    | 20.65    |
| 0.42 | 1920.12    | 7687.64     | 22713.98    | 79163.06     | 0.83 | 0.66   | 2.00    | 5.20    | 14.96    |
| 0.43 | 1620.89    | 6331.27     | 19204.91    | 67246.43     | 0.84 | 0.51   | 1.48    | 3.75    | 11.07    |
| 0.44 | 1366.36    | 5365.93     | 16259.65    | 56612.51     | 0.85 | 0.40   | 1.12    | 2.78    | 7.89     |
| 0.45 | 1129.93    | 4411.85     | 13568.23    | 47380.42     | 0.86 | 0.30   | 0.82    | 2.05    | 5.66     |
| 0.46 | 945.54     | 3740.45     | 11426.60    | 40599.82     | 0.87 | 0.23   | 0.61    | 1.46    | 3.98     |
| 0.47 | 806.84     | 3132.71     | 9715.54     | 32917.01     | 0.88 | 0.17   | 0.44    | 1.03    | 2.71     |
| 0.48 | 678.83     | 2585.39     | 8089.16     | 27601.64     | 0.89 | 0.13   | 0.31    | 0.71    | 1.88     |
| 0.49 | 564.54     | 2186.71     | 7012.16     | 23134.73     | 0.90 | 0.10   | 0.22    | 0.50    | 1.27     |
| 0.50 | 476.22     | 1842.59     | 5675.79     | 19812.03     |      |        |         |         |          |

Table S39: Critical values for detector  $\hat{H}^m$  and IM-OLS estimation in a model with intercept. The number of integrated regressors is 2 and the highest power of  $x_{kt}$  is 3.



| m    | 90 %       | 95 %       | 97,5 %      | 99 %        | m    | 90 %   | 95 %   | 97,5 %  | 99 %    |
|------|------------|------------|-------------|-------------|------|--------|--------|---------|---------|
| 0.10 | 1950654.81 | 6683426.33 | 18528246.21 | 57174517.12 | 0.51 | 110.61 | 376.45 | 1068.35 | 3055.56 |
| 0.11 | 1228877.86 | 4086302.30 | 11718081.36 | 36466992.50 | 0.52 | 94.20  | 317.41 | 884.48  | 2555.95 |
| 0.12 | 805225.72  | 2778401.89 | 7781562.11  | 23690258.31 | 0.53 | 78.07  | 261.52 | 714.25  | 2184.31 |
| 0.13 | 541279.95  | 1853671.27 | 5444943.12  | 16303377.95 | 0.54 | 65.13  | 222.17 | 601.70  | 1798.59 |
| 0.14 | 377083.29  | 1316099.30 | 3707021.65  | 11359247.58 | 0.55 | 54.50  | 184.79 | 494.49  | 1484.45 |
| 0.15 | 262590.72  | 936129.88  | 2659345.86  | 8288737.89  | 0.56 | 46.32  | 158.24 | 431.64  | 1226.58 |
| 0.16 | 187744.69  | 656939.15  | 1848124.34  | 6147806.77  | 0.57 | 38.60  | 129.00 | 344.48  | 1022.85 |
| 0.17 | 136635.23  | 465776.48  | 1316093.16  | 4327651.53  | 0.58 | 32.11  | 107.09 | 291.68  | 863.80  |
| 0.18 | 101962.79  | 350773.11  | 1006525.82  | 3230026.37  | 0.59 | 26.38  | 87.87  | 240.25  | 716.62  |
| 0.19 | 76184.61   | 267258.55  | 738824.24   | 2455151.12  | 0.60 | 22.39  | 74.54  | 204.38  | 620.27  |
| 0.20 | 57622.60   | 204571.40  | 563749.40   | 1827412.12  | 0.61 | 19.04  | 61.68  | 168.09  | 524.63  |
| 0.21 | 44313.84   | 153563.47  | 431168.68   | 1381783.92  | 0.62 | 15.84  | 51.22  | 137.28  | 424.52  |
| 0.22 | 33118.54   | 118882.13  | 331973.16   | 1064401.95  | 0.63 | 13.52  | 43.84  | 116.20  | 356.94  |
| 0.23 | 26818.19   | 92087.63   | 260997.96   | 817373.75   | 0.64 | 11.07  | 34.68  | 92.63   | 292.91  |
| 0.24 | 20572.96   | 73179.75   | 205554.34   | 661087.17   | 0.65 | 9.17   | 28.04  | 75.98   | 232.14  |
| 0.25 | 16303.32   | 56861.38   | 163031.53   | 524884.90   | 0.66 | 7.59   | 23.39  | 61.73   | 186.91  |
| 0.26 | 12842.30   | 46423.90   | 127207.76   | 414023.86   | 0.67 | 6.34   | 19.23  | 50.56   | 149.22  |
| 0.27 | 10413.60   | 36786.60   | 103540.87   | 333975.14   | 0.68 | 5.29   | 15.52  | 40.78   | 124.93  |
| 0.28 | 8218.50    | 29334.39   | 81435.83    | 263335.69   | 0.69 | 4.50   | 12.82  | 33.35   | 99.49   |
| 0.29 | 6574.82    | 23534.58   | 65338.85    | 207191.20   | 0.70 | 3.68   | 10.40  | 27.07   | 77.54   |
| 0.30 | 5368.87    | 18679.55   | 52737.78    | 168489.39   | 0.71 | 3.05   | 8.77   | 22.37   | 65.18   |
| 0.31 | 4362.53    | 15122.79   | 43210.71    | 139044.41   | 0.72 | 2.59   | 7.32   | 18.33   | 51.56   |
| 0.32 | 3511.11    | 12269.60   | 35098.43    | 113536.59   | 0.73 | 2.09   | 5.85   | 14.57   | 40.16   |
| 0.33 | 2926.29    | 10263.10   | 29121.58    | 94678.75    | 0.74 | 1.71   | 4.63   | 11.44   | 31.74   |
| 0.34 | 2406.03    | 8205.63    | 23850.47    | 78044.81    | 0.75 | 1.41   | 3.78   | 9.15    | 24.45   |
| 0.35 | 2000.84    | 6854.76    | 19235.52    | 63533.92    | 0.76 | 1.14   | 3.04   | 7.43    | 20.04   |
| 0.36 | 1641.55    | 5643.64    | 15799.33    | 51899.41    | 0.77 | 0.94   | 2.46   | 5.85    | 16.00   |
| 0.37 | 1356.38    | 4659.77    | 12623.34    | 40334.67    | 0.78 | 0.75   | 1.89   | 4.72    | 12.57   |
| 0.38 | 1123.79    | 3864.13    | 10704.72    | 35183.56    | 0.79 | 0.61   | 1.51   | 3.49    | 9.38    |
| 0.39 | 938.79     | 3212.82    | 8979.96     | 27771.29    | 0.80 | 0.48   | 1.18   | 2.75    | 6.99    |
| 0.40 | 774.59     | 2683.98    | 7405.72     | 23657.41    | 0.81 | 0.39   | 0.89   | 2.06    | 5.48    |
| 0.41 | 648.62     | 2225.78    | 6300.98     | 19371.14    | 0.82 | 0.31   | 0.71   | 1.61    | 4.17    |
| 0.42 | 541.24     | 1859.20    | 5096.48     | 16508.90    | 0.83 | 0.24   | 0.54   | 1.21    | 2.95    |
| 0.43 | 456.04     | 1585.68    | 4246.83     | 13474.42    | 0.84 | 0.19   | 0.40   | 0.90    | 2.17    |
| 0.44 | 377.23     | 1295.24    | 3576.47     | 11080.95    | 0.85 | 0.15   | 0.31   | 0.64    | 1.58    |
| 0.45 | 314.31     | 1087.01    | 3090.97     | 9381.72     | 0.86 | 0.11   | 0.23   | 0.47    | 1.12    |
| 0.46 | 267.10     | 910.99     | 2513.34     | 7743.92     | 0.87 | 0.09   | 0.17   | 0.35    | 0.80    |
| 0.47 | 223.60     | 765.58     | 2149.27     | 6832.93     | 0.88 | 0.07   | 0.12   | 0.24    | 0.54    |
| 0.48 | 189.13     | 647.67     | 1809.26     | 5633.13     | 0.89 | 0.05   | 0.09   | 0.17    | 0.38    |
| 0.49 | 155.68     | 522.17     | 1478.98     | 4582.93     | 0.90 | 0.04   | 0.06   | 0.11    | 0.24    |
| 0.50 | 130.94     | 448.32     | 1244.43     | 3740.39     |      |        |        |         |         |

Table S40: Critical values for detector  $\hat{H}^m$  and FM-OLS and D-OLS estimation in a model with intercept and linear trend. The number of integrated regressors is 2 and the highest power of  $x_{kt}$  is 3.

| m    | 90 %       | 95 %        | 97,5 %      | 99 %         | m    | 90 %   | 95 %    | 97,5 %  | 99 %     |
|------|------------|-------------|-------------|--------------|------|--------|---------|---------|----------|
| 0.10 | 6807543.34 | 24663236.66 | 74099964.94 | 256313140.58 | 0.51 | 368.56 | 1407.59 | 4240.97 | 13848.28 |
| 0.11 | 4348340.14 | 15868245.77 | 46812688.01 | 165676100.62 | 0.52 | 303.65 | 1162.73 | 3363.24 | 11443.87 |
| 0.12 | 2834892.99 | 10498042.45 | 31043883.29 | 103015813.40 | 0.53 | 255.02 | 968.69  | 2844.67 | 9569.86  |
| 0.13 | 1903076.74 | 6941148.19  | 21453860.64 | 75798149.96  | 0.54 | 214.00 | 815.10  | 2406.82 | 8214.36  |
| 0.14 | 1284005.88 | 4730293.74  | 14317608.09 | 53514005.91  | 0.55 | 181.86 | 677.17  | 1988.70 | 6856.37  |
| 0.15 | 890561.75  | 3316925.58  | 10237675.44 | 36487172.52  | 0.56 | 153.22 | 574.06  | 1695.96 | 5554.05  |
| 0.16 | 652044.69  | 2403591.04  | 7306377.35  | 25639017.72  | 0.57 | 128.12 | 475.51  | 1392.58 | 4577.39  |
| 0.17 | 466837.01  | 1738263.16  | 5108584.25  | 18355946.52  | 0.58 | 107.21 | 393.33  | 1149.79 | 3943.36  |
| 0.18 | 347411.95  | 1302421.32  | 3864699.48  | 13471785.79  | 0.59 | 90.36  | 326.25  | 963.88  | 3237.16  |
| 0.19 | 257428.13  | 958935.70   | 2872834.06  | 10481014.94  | 0.60 | 74.79  | 273.53  | 803.08  | 2629.72  |
| 0.20 | 194798.25  | 753077.17   | 2270147.98  | 8010135.01   | 0.61 | 61.91  | 226.12  | 673.05  | 2130.04  |
| 0.21 | 148651.45  | 572984.30   | 1701620.81  | 6210437.83   | 0.62 | 51.84  | 189.67  | 549.73  | 1790.40  |
| 0.22 | 114846.62  | 437206.11   | 1332002.29  | 4680633.22   | 0.63 | 43.43  | 160.55  | 458.87  | 1507.92  |
| 0.23 | 89268.28   | 339252.47   | 1048759.10  | 3581999.88   | 0.64 | 36.06  | 132.12  | 373.10  | 1234.31  |
| 0.24 | 70912.97   | 274599.94   | 829135.33   | 2892582.78   | 0.65 | 30.10  | 108.08  | 304.49  | 987.74   |
| 0.25 | 55993.58   | 217655.75   | 664566.48   | 2242642.06   | 0.66 | 24.73  | 86.43   | 254.00  | 788.18   |
| 0.26 | 44607.69   | 172735.91   | 510581.24   | 1813832.94   | 0.67 | 20.33  | 70.64   | 206.73  | 636.34   |
| 0.27 | 35173.21   | 138594.23   | 429700.36   | 1495169.63   | 0.68 | 16.86  | 57.91   | 166.83  | 514.64   |
| 0.28 | 28271.62   | 111208.43   | 341426.28   | 1182678.64   | 0.69 | 14.04  | 46.84   | 138.83  | 424.44   |
| 0.29 | 22479.86   | 88198.92    | 268542.08   | 951447.22    | 0.70 | 11.57  | 37.72   | 112.79  | 346.63   |
| 0.30 | 18519.53   | 69195.11    | 212444.57   | 738362.61    | 0.71 | 9.47   | 31.22   | 90.58   | 279.28   |
| 0.31 | 15048.76   | 56011.10    | 168697.96   | 593902.69    | 0.72 | 7.87   | 25.63   | 73.49   | 226.41   |
| 0.32 | 12385.96   | 45672.51    | 137929.72   | 502533.49    | 0.73 | 6.53   | 21.11   | 59.14   | 176.63   |
| 0.33 | 10032.99   | 37337.25    | 114625.94   | 398185.32    | 0.74 | 5.29   | 17.03   | 46.37   | 140.01   |
| 0.34 | 8269.30    | 31162.95    | 98203.91    | 329553.75    | 0.75 | 4.25   | 13.61   | 36.32   | 111.14   |
| 0.35 | 6828.21    | 25553.72    | 80342.90    | 269832.69    | 0.76 | 3.44   | 10.68   | 28.18   | 87.48    |
| 0.36 | 5624.57    | 20760.13    | 64322.89    | 215009.30    | 0.77 | 2.74   | 8.45    | 22.47   | 67.93    |
| 0.37 | 4664.45    | 17202.27    | 51304.76    | 181577.52    | 0.78 | 2.21   | 6.79    | 17.66   | 52.58    |
| 0.38 | 3902.12    | 14419.35    | 42629.14    | 152031.76    | 0.79 | 1.76   | 5.30    | 13.81   | 40.65    |
| 0.39 | 3194.94    | 12135.69    | 35914.32    | 125197.20    | 0.80 | 1.38   | 4.15    | 10.63   | 31.31    |
| 0.40 | 2655.59    | 10130.19    | 30021.61    | 104355.77    | 0.81 | 1.11   | 3.21    | 8.13    | 24.01    |
| 0.41 | 2193.67    | 8293.03     | 25210.12    | 88380.74     | 0.82 | 0.87   | 2.45    | 6.44    | 18.36    |
| 0.42 | 1816.21    | 6761.63     | 20735.85    | 72560.08     | 0.83 | 0.68   | 1.86    | 4.75    | 13.51    |
| 0.43 | 1509.30    | 5610.65     | 17019.85    | 60444.75     | 0.84 | 0.53   | 1.38    | 3.42    | 9.49     |
| 0.44 | 1277.79    | 4794.78     | 14494.11    | 49569.42     | 0.85 | 0.42   | 1.03    | 2.48    | 6.91     |
| 0.45 | 1079.18    | 4011.45     | 12048.15    | 41079.42     | 0.86 | 0.32   | 0.76    | 1.75    | 4.89     |
| 0.46 | 901.21     | 3375.76     | 9933.10     | 34488.33     | 0.87 | 0.24   | 0.55    | 1.25    | 3.45     |
| 0.47 | 748.41     | 2787.23     | 8362.66     | 28660.56     | 0.88 | 0.18   | 0.41    | 0.91    | 2.38     |
| 0.48 | 629.81     | 2362.52     | 7266.01     | 23501.70     | 0.89 | 0.14   | 0.29    | 0.62    | 1.61     |
| 0.49 | 526.76     | 1973.05     | 6015.83     | 19696.85     | 0.90 | 0.10   | 0.20    | 0.43    | 1.06     |
| 0.50 | 439.80     | 1663.65     | 5007.03     | 16759.45     |      |        |         |         |          |

Table S41: Critical values for detector  $\hat{H}^m$  and IM-OLS estimation in a model with intercept and linear trend. The number of integrated regressors is 2 and the highest power of  $x_{kt}$  is 3.

### 1.3 Number of I(1) regressors: 3

| m    | 90 %   | 95 %    | 97,5 %  | 99 %    | m    | 90 % | 95 % | 97,5 % | 99 %  |
|------|--------|---------|---------|---------|------|------|------|--------|-------|
| 0.10 | 814.17 | 1362.18 | 2090.96 | 3450.80 | 0.51 | 4.22 | 6.78 | 10.10  | 15.85 |
| 0.11 | 648.19 | 1078.74 | 1666.78 | 2689.66 | 0.52 | 3.80 | 6.13 | 9.04   | 13.99 |
| 0.12 | 526.16 | 881.17  | 1340.44 | 2142.93 | 0.53 | 3.42 | 5.50 | 8.20   | 12.66 |
| 0.13 | 430.43 | 724.00  | 1110.13 | 1782.81 | 0.54 | 3.08 | 4.96 | 7.40   | 11.38 |
| 0.14 | 359.47 | 599.36  | 924.13  | 1481.86 | 0.55 | 2.79 | 4.51 | 6.70   | 10.19 |
| 0.15 | 298.61 | 503.42  | 767.10  | 1229.99 | 0.56 | 2.55 | 4.02 | 5.97   | 9.11  |
| 0.16 | 252.70 | 427.30  | 658.95  | 1042.01 | 0.57 | 2.27 | 3.65 | 5.37   | 8.25  |
| 0.17 | 212.70 | 360.06  | 554.95  | 885.09  | 0.58 | 2.05 | 3.26 | 4.80   | 7.31  |
| 0.18 | 181.64 | 309.57  | 474.93  | 764.07  | 0.59 | 1.86 | 2.93 | 4.30   | 6.59  |
| 0.19 | 155.88 | 265.65  | 399.86  | 649.55  | 0.60 | 1.66 | 2.64 | 3.88   | 5.82  |
| 0.20 | 134.22 | 227.02  | 347.46  | 559.50  | 0.61 | 1.50 | 2.37 | 3.45   | 5.24  |
| 0.21 | 117.28 | 197.15  | 301.87  | 482.19  | 0.62 | 1.34 | 2.12 | 3.07   | 4.69  |
| 0.22 | 102.69 | 170.65  | 263.80  | 413.52  | 0.63 | 1.20 | 1.89 | 2.73   | 4.09  |
| 0.23 | 89.92  | 149.46  | 230.00  | 370.06  | 0.64 | 1.08 | 1.68 | 2.44   | 3.68  |
| 0.24 | 78.87  | 130.92  | 201.00  | 322.80  | 0.65 | 0.96 | 1.52 | 2.16   | 3.27  |
| 0.25 | 69.60  | 114.94  | 176.92  | 280.46  | 0.66 | 0.85 | 1.33 | 1.92   | 2.89  |
| 0.26 | 61.08  | 102.41  | 156.01  | 248.66  | 0.67 | 0.76 | 1.18 | 1.72   | 2.54  |
| 0.27 | 54.44  | 91.11   | 138.95  | 220.27  | 0.68 | 0.68 | 1.04 | 1.50   | 2.24  |
| 0.28 | 47.93  | 81.02   | 123.66  | 194.92  | 0.69 | 0.60 | 0.92 | 1.33   | 1.99  |
| 0.29 | 43.03  | 71.47   | 108.03  | 172.55  | 0.70 | 0.53 | 0.82 | 1.18   | 1.75  |
| 0.30 | 38.11  | 63.69   | 97.33   | 153.59  | 0.71 | 0.47 | 0.72 | 1.03   | 1.54  |
| 0.31 | 33.92  | 57.26   | 86.93   | 135.43  | 0.72 | 0.42 | 0.64 | 0.90   | 1.34  |
| 0.32 | 30.63  | 51.23   | 77.49   | 122.12  | 0.73 | 0.37 | 0.56 | 0.79   | 1.15  |
| 0.33 | 27.38  | 45.56   | 69.35   | 108.47  | 0.74 | 0.32 | 0.49 | 0.69   | 1.00  |
| 0.34 | 24.59  | 40.97   | 62.27   | 97.81   | 0.75 | 0.28 | 0.43 | 0.59   | 0.87  |
| 0.35 | 22.18  | 36.87   | 55.68   | 89.29   | 0.76 | 0.25 | 0.37 | 0.52   | 0.75  |
| 0.36 | 20.10  | 33.26   | 50.13   | 80.24   | 0.77 | 0.22 | 0.32 | 0.45   | 0.64  |
| 0.37 | 18.03  | 29.90   | 45.24   | 72.45   | 0.78 | 0.19 | 0.28 | 0.39   | 0.55  |
| 0.38 | 16.20  | 26.95   | 40.57   | 64.21   | 0.79 | 0.16 | 0.24 | 0.33   | 0.47  |
| 0.39 | 14.68  | 24.12   | 36.32   | 57.24   | 0.80 | 0.14 | 0.20 | 0.28   | 0.40  |
| 0.40 | 13.13  | 21.86   | 32.60   | 51.55   | 0.81 | 0.12 | 0.17 | 0.24   | 0.34  |
| 0.41 | 11.88  | 19.52   | 29.28   | 45.97   | 0.82 | 0.10 | 0.15 | 0.20   | 0.29  |
| 0.42 | 10.74  | 17.63   | 26.32   | 41.31   | 0.83 | 0.08 | 0.12 | 0.17   | 0.24  |
| 0.43 | 9.66   | 15.66   | 23.63   | 36.90   | 0.84 | 0.07 | 0.10 | 0.14   | 0.20  |
| 0.44 | 8.69   | 14.24   | 21.25   | 33.21   | 0.85 | 0.06 | 0.09 | 0.12   | 0.16  |
| 0.45 | 7.80   | 12.89   | 19.38   | 29.53   | 0.86 | 0.05 | 0.07 | 0.10   | 0.13  |
| 0.46 | 7.09   | 11.69   | 17.25   | 26.53   | 0.87 | 0.04 | 0.06 | 0.08   | 0.11  |
| 0.47 | 6.36   | 10.39   | 15.43   | 23.92   | 0.88 | 0.03 | 0.05 | 0.06   | 0.08  |
| 0.48 | 5.76   | 9.41    | 13.76   | 21.47   | 0.89 | 0.03 | 0.04 | 0.05   | 0.07  |
| 0.49 | 5.20   | 8.48    | 12.64   | 19.70   | 0.90 | 0.02 | 0.03 | 0.04   | 0.05  |
| 0.50 | 4.68   | 7.59    | 11.30   | 17.53   |      |      |      |        |       |

Table S42: Critical values for detector  $\hat{H}^m$  and FM-OLS and D-OLS estimation in a model with intercept. The number of integrated regressors is 3 and the highest power of  $x_{kt}$  is 1.

| m    | 90 %    | 95 %    | 97,5 %  | 99 %    | m    | 90 % | 95 %  | 97,5 % | 99 %  |
|------|---------|---------|---------|---------|------|------|-------|--------|-------|
| 0.10 | 1644.53 | 2883.27 | 4624.28 | 7738.50 | 0.51 | 8.54 | 14.36 | 22.14  | 36.24 |
| 0.11 | 1319.36 | 2298.66 | 3657.46 | 6232.43 | 0.52 | 7.69 | 12.95 | 20.22  | 32.37 |
| 0.12 | 1059.52 | 1857.52 | 2967.86 | 5063.50 | 0.53 | 6.92 | 11.65 | 17.99  | 29.15 |
| 0.13 | 868.75  | 1516.53 | 2435.32 | 4106.94 | 0.54 | 6.20 | 10.46 | 16.24  | 26.26 |
| 0.14 | 723.53  | 1254.99 | 2017.31 | 3450.65 | 0.55 | 5.61 | 9.43  | 14.60  | 23.54 |
| 0.15 | 605.76  | 1060.82 | 1717.76 | 2901.36 | 0.56 | 5.06 | 8.46  | 13.04  | 21.20 |
| 0.16 | 511.91  | 881.26  | 1430.21 | 2439.29 | 0.57 | 4.57 | 7.60  | 11.70  | 18.87 |
| 0.17 | 429.05  | 759.95  | 1209.15 | 2063.02 | 0.58 | 4.11 | 6.85  | 10.44  | 16.82 |
| 0.18 | 368.13  | 643.65  | 1035.71 | 1783.69 | 0.59 | 3.68 | 6.16  | 9.30   | 14.96 |
| 0.19 | 317.19  | 550.35  | 883.56  | 1502.65 | 0.60 | 3.33 | 5.51  | 8.35   | 13.21 |
| 0.20 | 273.87  | 471.58  | 745.00  | 1241.75 | 0.61 | 2.99 | 4.90  | 7.44   | 11.86 |
| 0.21 | 236.51  | 412.73  | 644.44  | 1089.16 | 0.62 | 2.68 | 4.40  | 6.71   | 10.68 |
| 0.22 | 207.06  | 361.47  | 559.48  | 946.65  | 0.63 | 2.42 | 3.96  | 5.98   | 9.51  |
| 0.23 | 181.53  | 313.05  | 493.61  | 833.61  | 0.64 | 2.16 | 3.56  | 5.35   | 8.49  |
| 0.24 | 159.12  | 273.50  | 436.09  | 725.68  | 0.65 | 1.93 | 3.17  | 4.78   | 7.56  |
| 0.25 | 139.54  | 241.87  | 384.77  | 635.32  | 0.66 | 1.72 | 2.83  | 4.23   | 6.71  |
| 0.26 | 122.98  | 213.71  | 339.82  | 557.87  | 0.67 | 1.54 | 2.53  | 3.74   | 5.92  |
| 0.27 | 108.95  | 189.59  | 297.21  | 498.77  | 0.68 | 1.37 | 2.22  | 3.30   | 5.23  |
| 0.28 | 97.17   | 167.62  | 263.81  | 441.68  | 0.69 | 1.22 | 1.96  | 2.92   | 4.63  |
| 0.29 | 86.58   | 149.88  | 234.03  | 389.82  | 0.70 | 1.08 | 1.74  | 2.58   | 4.07  |
| 0.30 | 76.97   | 132.85  | 207.83  | 347.70  | 0.71 | 0.96 | 1.53  | 2.30   | 3.59  |
| 0.31 | 68.73   | 118.52  | 186.39  | 306.55  | 0.72 | 0.85 | 1.36  | 2.02   | 3.14  |
| 0.32 | 61.67   | 106.81  | 166.24  | 273.86  | 0.73 | 0.75 | 1.20  | 1.77   | 2.73  |
| 0.33 | 55.45   | 95.29   | 148.27  | 246.62  | 0.74 | 0.66 | 1.06  | 1.56   | 2.40  |
| 0.34 | 49.84   | 84.78   | 132.77  | 221.72  | 0.75 | 0.58 | 0.92  | 1.37   | 2.08  |
| 0.35 | 44.69   | 76.69   | 120.27  | 201.06  | 0.76 | 0.51 | 0.81  | 1.18   | 1.79  |
| 0.36 | 40.12   | 68.70   | 107.01  | 177.18  | 0.77 | 0.45 | 0.70  | 1.03   | 1.54  |
| 0.37 | 36.22   | 61.55   | 96.35   | 163.59  | 0.78 | 0.39 | 0.61  | 0.88   | 1.34  |
| 0.38 | 32.67   | 55.51   | 87.74   | 146.63  | 0.79 | 0.34 | 0.53  | 0.76   | 1.15  |
| 0.39 | 29.31   | 49.96   | 77.94   | 130.43  | 0.80 | 0.29 | 0.45  | 0.64   | 0.97  |
| 0.40 | 26.31   | 45.19   | 70.01   | 118.27  | 0.81 | 0.25 | 0.39  | 0.55   | 0.82  |
| 0.41 | 23.97   | 40.81   | 63.40   | 104.85  | 0.82 | 0.22 | 0.33  | 0.47   | 0.69  |
| 0.42 | 21.64   | 36.79   | 57.20   | 94.93   | 0.83 | 0.18 | 0.28  | 0.40   | 0.59  |
| 0.43 | 19.40   | 33.39   | 51.18   | 83.76   | 0.84 | 0.16 | 0.24  | 0.33   | 0.49  |
| 0.44 | 17.48   | 30.06   | 46.30   | 76.75   | 0.85 | 0.13 | 0.20  | 0.28   | 0.40  |
| 0.45 | 15.86   | 27.01   | 42.04   | 69.22   | 0.86 | 0.11 | 0.17  | 0.23   | 0.33  |
| 0.46 | 14.24   | 24.32   | 38.04   | 62.12   | 0.87 | 0.09 | 0.14  | 0.19   | 0.27  |
| 0.47 | 12.88   | 21.90   | 33.82   | 56.17   | 0.88 | 0.08 | 0.11  | 0.16   | 0.22  |
| 0.48 | 11.56   | 19.70   | 30.59   | 49.93   | 0.89 | 0.06 | 0.09  | 0.13   | 0.18  |
| 0.49 | 10.44   | 17.82   | 27.47   | 45.13   | 0.90 | 0.05 | 0.07  | 0.10   | 0.14  |
| 0.50 | 9.50    | 16.04   | 24.69   | 40.33   |      |      |       |        |       |

Table S43: Critical values for detector  $\hat{H}^m$  and IM-OLS estimation in a model with intercept. The number of integrated regressors is 3 and the highest power of  $x_{kt}$  is 1.

| m    | 90 %    | 95 %     | 97,5 %   | 99 %     | m    | 90 %  | 95 %  | 97,5 % | 99 %  |
|------|---------|----------|----------|----------|------|-------|-------|--------|-------|
| 0.10 | 9987.20 | 16082.51 | 23691.51 | 36809.85 | 0.51 | 10.74 | 16.96 | 24.44  | 36.51 |
| 0.11 | 7222.98 | 11726.28 | 17322.43 | 26328.61 | 0.52 | 9.39  | 14.82 | 21.56  | 32.38 |
| 0.12 | 5387.64 | 8686.37  | 12767.25 | 19885.63 | 0.53 | 8.32  | 13.10 | 19.17  | 29.10 |
| 0.13 | 4051.36 | 6512.06  | 9727.35  | 15049.10 | 0.54 | 7.34  | 11.69 | 16.98  | 25.78 |
| 0.14 | 3152.93 | 5036.95  | 7415.01  | 11539.68 | 0.55 | 6.58  | 10.39 | 15.03  | 22.65 |
| 0.15 | 2478.55 | 3986.80  | 5832.27  | 9043.34  | 0.56 | 5.81  | 9.11  | 13.15  | 19.85 |
| 0.16 | 1971.45 | 3172.51  | 4706.81  | 7127.76  | 0.57 | 5.12  | 8.03  | 11.71  | 17.68 |
| 0.17 | 1577.88 | 2552.41  | 3811.81  | 5785.40  | 0.58 | 4.53  | 7.10  | 10.19  | 15.37 |
| 0.18 | 1276.04 | 2053.25  | 3022.35  | 4677.79  | 0.59 | 4.04  | 6.30  | 9.13   | 13.49 |
| 0.19 | 1031.70 | 1677.32  | 2482.52  | 3799.86  | 0.60 | 3.56  | 5.54  | 8.05   | 12.00 |
| 0.20 | 856.04  | 1373.12  | 2022.20  | 3111.20  | 0.61 | 3.15  | 4.92  | 7.00   | 10.42 |
| 0.21 | 705.11  | 1147.39  | 1690.36  | 2568.56  | 0.62 | 2.79  | 4.31  | 6.17   | 9.19  |
| 0.22 | 587.31  | 941.16   | 1389.10  | 2150.35  | 0.63 | 2.45  | 3.80  | 5.44   | 8.01  |
| 0.23 | 492.64  | 794.18   | 1165.33  | 1794.51  | 0.64 | 2.15  | 3.33  | 4.77   | 7.05  |
| 0.24 | 411.93  | 664.84   | 983.80   | 1519.58  | 0.65 | 1.87  | 2.88  | 4.17   | 6.13  |
| 0.25 | 349.31  | 567.96   | 845.33   | 1290.10  | 0.66 | 1.64  | 2.52  | 3.57   | 5.28  |
| 0.26 | 297.84  | 478.41   | 706.94   | 1094.72  | 0.67 | 1.45  | 2.19  | 3.12   | 4.63  |
| 0.27 | 255.66  | 410.48   | 604.25   | 938.64   | 0.68 | 1.26  | 1.92  | 2.71   | 4.00  |
| 0.28 | 219.21  | 350.43   | 522.18   | 816.64   | 0.69 | 1.09  | 1.67  | 2.35   | 3.45  |
| 0.29 | 186.80  | 302.00   | 442.02   | 688.33   | 0.70 | 0.96  | 1.45  | 2.05   | 3.04  |
| 0.30 | 161.52  | 260.36   | 380.02   | 591.57   | 0.71 | 0.83  | 1.27  | 1.79   | 2.62  |
| 0.31 | 139.52  | 225.17   | 331.16   | 496.96   | 0.72 | 0.72  | 1.10  | 1.54   | 2.23  |
| 0.32 | 121.93  | 195.01   | 287.39   | 435.07   | 0.73 | 0.63  | 0.95  | 1.32   | 1.91  |
| 0.33 | 105.36  | 168.79   | 246.95   | 374.66   | 0.74 | 0.54  | 0.81  | 1.14   | 1.66  |
| 0.34 | 91.38   | 146.71   | 217.61   | 334.36   | 0.75 | 0.46  | 0.70  | 0.97   | 1.41  |
| 0.35 | 80.16   | 129.37   | 191.50   | 292.51   | 0.76 | 0.40  | 0.60  | 0.83   | 1.20  |
| 0.36 | 70.51   | 112.97   | 166.01   | 256.20   | 0.77 | 0.34  | 0.51  | 0.70   | 1.00  |
| 0.37 | 61.50   | 100.33   | 145.35   | 219.85   | 0.78 | 0.29  | 0.43  | 0.60   | 0.83  |
| 0.38 | 53.86   | 86.16    | 127.01   | 191.59   | 0.79 | 0.24  | 0.36  | 0.50   | 0.71  |
| 0.39 | 47.42   | 75.87    | 111.12   | 166.85   | 0.80 | 0.21  | 0.30  | 0.42   | 0.60  |
| 0.40 | 41.71   | 66.56    | 97.36    | 145.58   | 0.81 | 0.17  | 0.26  | 0.35   | 0.50  |
| 0.41 | 36.73   | 58.55    | 85.45    | 128.48   | 0.82 | 0.15  | 0.21  | 0.29   | 0.41  |
| 0.42 | 32.36   | 51.68    | 75.07    | 112.74   | 0.83 | 0.12  | 0.18  | 0.24   | 0.34  |
| 0.43 | 28.56   | 45.19    | 66.38    | 100.38   | 0.84 | 0.10  | 0.15  | 0.20   | 0.28  |
| 0.44 | 25.01   | 40.33    | 58.11    | 88.09    | 0.85 | 0.08  | 0.12  | 0.16   | 0.22  |
| 0.45 | 22.20   | 35.49    | 51.50    | 78.08    | 0.86 | 0.07  | 0.10  | 0.13   | 0.18  |
| 0.46 | 19.82   | 31.47    | 45.59    | 68.79    | 0.87 | 0.05  | 0.08  | 0.10   | 0.14  |
| 0.47 | 17.48   | 27.67    | 40.33    | 61.27    | 0.88 | 0.04  | 0.06  | 0.08   | 0.11  |
| 0.48 | 15.52   | 24.49    | 35.63    | 53.73    | 0.89 | 0.03  | 0.05  | 0.06   | 0.08  |
| 0.49 | 13.70   | 21.60    | 31.41    | 46.82    | 0.90 | 0.02  | 0.04  | 0.05   | 0.06  |
| 0.50 | 12.05   | 18.99    | 27.53    | 41.73    |      |       |       |        |       |

Table S44: Critical values for detector  $\hat{H}^m$  and FM-OLS and D-OLS estimation in a model with intercept and linear trend. The number of integrated regressors is 3 and the highest power of  $x_{kt}$  is 1.

| m    | 90 %     | 95 %     | 97,5 %   | 99 %     | m    | 90 %  | 95 %  | 97,5 % | 99 %  |
|------|----------|----------|----------|----------|------|-------|-------|--------|-------|
| 0.10 | 19688.14 | 32775.14 | 50660.10 | 82652.87 | 0.51 | 21.07 | 34.69 | 51.88  | 82.46 |
| 0.11 | 14358.10 | 23669.29 | 36438.75 | 59576.89 | 0.52 | 18.63 | 30.55 | 46.05  | 73.23 |
| 0.12 | 10512.01 | 17605.62 | 26898.11 | 43234.70 | 0.53 | 16.51 | 27.17 | 40.85  | 64.27 |
| 0.13 | 7959.60  | 13373.08 | 20547.32 | 33076.96 | 0.54 | 14.57 | 23.97 | 36.49  | 56.78 |
| 0.14 | 6161.31  | 10193.99 | 15660.15 | 25330.35 | 0.55 | 12.89 | 21.14 | 32.44  | 50.05 |
| 0.15 | 4822.77  | 8061.20  | 12470.93 | 20098.48 | 0.56 | 11.44 | 18.79 | 28.52  | 44.30 |
| 0.16 | 3845.43  | 6451.13  | 9812.63  | 15714.15 | 0.57 | 10.15 | 16.53 | 25.18  | 39.45 |
| 0.17 | 3086.47  | 5123.56  | 7908.10  | 12445.61 | 0.58 | 8.98  | 14.61 | 21.85  | 34.54 |
| 0.18 | 2466.42  | 4146.83  | 6393.20  | 10158.04 | 0.59 | 7.95  | 12.82 | 19.15  | 30.33 |
| 0.19 | 2011.04  | 3339.58  | 5129.79  | 8294.40  | 0.60 | 7.02  | 11.34 | 16.90  | 26.61 |
| 0.20 | 1645.45  | 2745.32  | 4208.80  | 6909.04  | 0.61 | 6.21  | 10.04 | 14.84  | 23.39 |
| 0.21 | 1361.26  | 2252.59  | 3452.35  | 5642.04  | 0.62 | 5.46  | 8.85  | 13.12  | 20.47 |
| 0.22 | 1123.02  | 1896.31  | 2865.74  | 4717.47  | 0.63 | 4.84  | 7.82  | 11.48  | 18.04 |
| 0.23 | 948.89   | 1574.31  | 2449.06  | 3897.28  | 0.64 | 4.26  | 6.87  | 10.11  | 15.90 |
| 0.24 | 800.52   | 1337.80  | 2060.81  | 3306.17  | 0.65 | 3.74  | 5.99  | 8.84   | 13.91 |
| 0.25 | 679.72   | 1130.56  | 1726.49  | 2794.31  | 0.66 | 3.27  | 5.28  | 7.72   | 12.09 |
| 0.26 | 576.09   | 963.54   | 1478.64  | 2392.13  | 0.67 | 2.87  | 4.60  | 6.85   | 10.41 |
| 0.27 | 496.31   | 827.65   | 1267.91  | 2018.34  | 0.68 | 2.50  | 4.04  | 5.95   | 9.08  |
| 0.28 | 422.34   | 717.11   | 1101.00  | 1741.01  | 0.69 | 2.19  | 3.51  | 5.12   | 7.88  |
| 0.29 | 365.50   | 615.26   | 941.45   | 1519.14  | 0.70 | 1.91  | 3.03  | 4.44   | 6.82  |
| 0.30 | 315.22   | 531.88   | 816.60   | 1313.93  | 0.71 | 1.67  | 2.63  | 3.82   | 5.88  |
| 0.31 | 273.81   | 460.88   | 705.85   | 1130.00  | 0.72 | 1.45  | 2.28  | 3.33   | 5.15  |
| 0.32 | 237.44   | 395.86   | 607.32   | 978.54   | 0.73 | 1.25  | 1.97  | 2.89   | 4.36  |
| 0.33 | 206.35   | 345.89   | 526.89   | 845.46   | 0.74 | 1.09  | 1.70  | 2.48   | 3.71  |
| 0.34 | 179.26   | 296.48   | 452.37   | 731.55   | 0.75 | 0.94  | 1.46  | 2.12   | 3.17  |
| 0.35 | 156.44   | 261.65   | 396.06   | 631.74   | 0.76 | 0.81  | 1.25  | 1.81   | 2.72  |
| 0.36 | 137.25   | 228.80   | 344.13   | 546.79   | 0.77 | 0.69  | 1.07  | 1.55   | 2.30  |
| 0.37 | 120.38   | 200.26   | 304.51   | 487.45   | 0.78 | 0.59  | 0.91  | 1.32   | 1.95  |
| 0.38 | 105.26   | 176.95   | 265.32   | 432.91   | 0.79 | 0.51  | 0.77  | 1.10   | 1.65  |
| 0.39 | 92.55    | 155.07   | 235.13   | 379.29   | 0.80 | 0.43  | 0.65  | 0.93   | 1.37  |
| 0.40 | 81.72    | 136.48   | 207.73   | 330.45   | 0.81 | 0.36  | 0.55  | 0.78   | 1.15  |
| 0.41 | 72.32    | 121.29   | 182.43   | 289.04   | 0.82 | 0.30  | 0.46  | 0.65   | 0.96  |
| 0.42 | 64.01    | 106.54   | 161.37   | 252.18   | 0.83 | 0.25  | 0.38  | 0.54   | 0.79  |
| 0.43 | 56.71    | 94.32    | 143.15   | 221.70   | 0.84 | 0.21  | 0.32  | 0.45   | 0.65  |
| 0.44 | 50.00    | 82.67    | 126.70   | 199.92   | 0.85 | 0.17  | 0.26  | 0.36   | 0.53  |
| 0.45 | 44.01    | 72.99    | 111.31   | 176.13   | 0.86 | 0.14  | 0.21  | 0.30   | 0.43  |
| 0.46 | 38.90    | 64.97    | 97.59    | 155.57   | 0.87 | 0.12  | 0.17  | 0.24   | 0.34  |
| 0.47 | 34.61    | 57.00    | 86.75    | 136.78   | 0.88 | 0.09  | 0.14  | 0.19   | 0.27  |
| 0.48 | 30.63    | 50.42    | 76.36    | 120.39   | 0.89 | 0.07  | 0.11  | 0.15   | 0.21  |
| 0.49 | 27.02    | 44.71    | 67.33    | 105.26   | 0.90 | 0.06  | 0.09  | 0.12   | 0.17  |
| 0.50 | 23.79    | 39.49    | 58.44    | 92.57    |      |       |       |        |       |

Table S45: Critical values for detector  $\hat{H}^m$  and IM-OLS estimation in a model with intercept and linear trend. The number of integrated regressors is 3 and the highest power of  $x_{kt}$  is 1.

| m    | 90 %     | 95 %     | 97,5 %   | 99 %      | m    | 90 %  | 95 %  | 97,5 % | 99 %   |
|------|----------|----------|----------|-----------|------|-------|-------|--------|--------|
| 0.10 | 15043.28 | 37924.86 | 84526.93 | 210812.44 | 0.51 | 12.93 | 27.26 | 52.32  | 114.66 |
| 0.11 | 10912.76 | 26965.61 | 58955.21 | 145300.52 | 0.52 | 11.36 | 23.72 | 45.67  | 99.85  |
| 0.12 | 8033.75  | 20092.49 | 43493.03 | 105817.79 | 0.53 | 10.00 | 20.75 | 39.57  | 85.24  |
| 0.13 | 5953.94  | 15031.00 | 32720.52 | 78527.11  | 0.54 | 8.85  | 18.40 | 34.78  | 73.36  |
| 0.14 | 4487.52  | 11418.92 | 24622.74 | 58957.83  | 0.55 | 7.78  | 15.88 | 30.47  | 64.37  |
| 0.15 | 3480.80  | 9126.59  | 19297.94 | 44639.66  | 0.56 | 6.83  | 13.91 | 26.53  | 54.19  |
| 0.16 | 2779.01  | 7006.33  | 15010.18 | 35051.93  | 0.57 | 5.99  | 12.31 | 22.99  | 47.54  |
| 0.17 | 2213.68  | 5538.42  | 11948.17 | 28162.16  | 0.58 | 5.26  | 10.79 | 20.10  | 41.62  |
| 0.18 | 1759.30  | 4422.18  | 9551.25  | 22495.90  | 0.59 | 4.62  | 9.29  | 17.22  | 36.10  |
| 0.19 | 1441.96  | 3560.91  | 7569.59  | 17545.31  | 0.60 | 4.10  | 8.13  | 15.09  | 31.56  |
| 0.20 | 1177.31  | 2899.84  | 6247.76  | 14548.06  | 0.61 | 3.59  | 7.21  | 13.23  | 27.59  |
| 0.21 | 953.18   | 2394.49  | 5033.43  | 12011.23  | 0.62 | 3.12  | 6.17  | 11.46  | 24.23  |
| 0.22 | 797.55   | 1963.94  | 4193.15  | 9887.64   | 0.63 | 2.73  | 5.36  | 10.02  | 20.33  |
| 0.23 | 673.47   | 1649.84  | 3579.30  | 8139.21   | 0.64 | 2.40  | 4.65  | 8.64   | 17.77  |
| 0.24 | 566.72   | 1361.80  | 2986.04  | 6925.15   | 0.65 | 2.08  | 4.00  | 7.41   | 15.08  |
| 0.25 | 475.14   | 1138.86  | 2519.44  | 5752.65   | 0.66 | 1.83  | 3.44  | 6.29   | 13.29  |
| 0.26 | 406.48   | 969.77   | 2085.13  | 4799.15   | 0.67 | 1.60  | 2.97  | 5.47   | 11.39  |
| 0.27 | 346.04   | 817.93   | 1745.92  | 3992.51   | 0.68 | 1.38  | 2.62  | 4.64   | 9.42   |
| 0.28 | 295.52   | 698.09   | 1512.20  | 3434.89   | 0.69 | 1.20  | 2.25  | 4.00   | 8.20   |
| 0.29 | 250.58   | 599.24   | 1262.98  | 2964.16   | 0.70 | 1.04  | 1.93  | 3.37   | 6.84   |
| 0.30 | 214.84   | 509.38   | 1067.25  | 2512.84   | 0.71 | 0.90  | 1.65  | 2.88   | 5.64   |
| 0.31 | 181.78   | 435.74   | 907.19   | 2111.77   | 0.72 | 0.78  | 1.41  | 2.45   | 4.75   |
| 0.32 | 157.52   | 374.81   | 779.28   | 1787.59   | 0.73 | 0.67  | 1.21  | 2.03   | 3.98   |
| 0.33 | 136.31   | 323.84   | 681.54   | 1536.34   | 0.74 | 0.58  | 1.02  | 1.71   | 3.25   |
| 0.34 | 117.22   | 274.48   | 572.93   | 1318.31   | 0.75 | 0.49  | 0.86  | 1.42   | 2.78   |
| 0.35 | 101.96   | 238.78   | 490.62   | 1139.46   | 0.76 | 0.42  | 0.74  | 1.24   | 2.30   |
| 0.36 | 89.54    | 208.51   | 428.57   | 963.02    | 0.77 | 0.36  | 0.61  | 1.02   | 1.88   |
| 0.37 | 78.55    | 178.85   | 367.33   | 839.30    | 0.78 | 0.30  | 0.52  | 0.85   | 1.54   |
| 0.38 | 67.99    | 156.14   | 315.82   | 707.78    | 0.79 | 0.25  | 0.43  | 0.68   | 1.24   |
| 0.39 | 60.25    | 134.16   | 273.54   | 612.79    | 0.80 | 0.21  | 0.35  | 0.57   | 1.01   |
| 0.40 | 52.99    | 117.79   | 237.65   | 538.50    | 0.81 | 0.18  | 0.29  | 0.46   | 0.82   |
| 0.41 | 46.70    | 102.43   | 207.32   | 463.02    | 0.82 | 0.15  | 0.24  | 0.37   | 0.65   |
| 0.42 | 40.58    | 88.91    | 179.73   | 405.91    | 0.83 | 0.12  | 0.20  | 0.30   | 0.52   |
| 0.43 | 35.48    | 77.97    | 155.86   | 356.67    | 0.84 | 0.10  | 0.16  | 0.25   | 0.42   |
| 0.44 | 31.65    | 68.52    | 135.82   | 300.78    | 0.85 | 0.08  | 0.13  | 0.19   | 0.32   |
| 0.45 | 27.59    | 59.80    | 118.31   | 261.01    | 0.86 | 0.07  | 0.10  | 0.15   | 0.25   |
| 0.46 | 24.12    | 52.57    | 104.37   | 224.62    | 0.87 | 0.05  | 0.08  | 0.12   | 0.19   |
| 0.47 | 21.43    | 45.91    | 91.06    | 193.71    | 0.88 | 0.04  | 0.06  | 0.09   | 0.14   |
| 0.48 | 18.86    | 40.21    | 79.92    | 176.28    | 0.89 | 0.03  | 0.05  | 0.07   | 0.11   |
| 0.49 | 16.44    | 35.10    | 69.59    | 153.51    | 0.90 | 0.03  | 0.04  | 0.05   | 0.08   |
| 0.50 | 14.52    | 30.98    | 60.58    | 129.35    |      |       |       |        |        |

Table S46: Critical values for detector  $\hat{H}^m$  and FM-OLS and D-OLS estimation in a model with intercept. The number of integrated regressors is 3 and the highest power of  $x_{kt}$  is 2.

| m    | 90 %     | 95 %     | 97,5 %    | 99 %      | m    | 90 %  | 95 %  | 97,5 % | 99 %   |
|------|----------|----------|-----------|-----------|------|-------|-------|--------|--------|
| 0.10 | 36923.69 | 99741.09 | 229606.96 | 576422.40 | 0.51 | 30.18 | 68.46 | 140.73 | 321.33 |
| 0.11 | 26644.62 | 70685.20 | 159844.25 | 405200.60 | 0.52 | 26.75 | 61.27 | 124.56 | 279.80 |
| 0.12 | 19923.44 | 53557.57 | 117395.21 | 311255.16 | 0.53 | 23.67 | 52.81 | 108.79 | 250.09 |
| 0.13 | 14993.61 | 40239.14 | 90283.98  | 222305.59 | 0.54 | 20.69 | 46.41 | 93.58  | 223.68 |
| 0.14 | 11418.73 | 30403.43 | 70022.41  | 166441.31 | 0.55 | 18.07 | 40.55 | 82.70  | 198.72 |
| 0.15 | 8817.57  | 23359.04 | 52759.18  | 130724.48 | 0.56 | 15.81 | 35.93 | 73.15  | 167.39 |
| 0.16 | 6907.28  | 18153.59 | 41697.51  | 107167.13 | 0.57 | 13.79 | 31.33 | 63.43  | 144.55 |
| 0.17 | 5518.02  | 14279.42 | 32714.62  | 84710.63  | 0.58 | 12.21 | 26.94 | 55.56  | 126.92 |
| 0.18 | 4377.57  | 11407.20 | 25837.39  | 69481.00  | 0.59 | 10.68 | 23.64 | 47.93  | 111.85 |
| 0.19 | 3500.60  | 9328.59  | 21247.57  | 54611.82  | 0.60 | 9.40  | 20.68 | 42.22  | 93.38  |
| 0.20 | 2866.79  | 7531.13  | 16663.92  | 43791.70  | 0.61 | 8.32  | 17.97 | 36.13  | 80.85  |
| 0.21 | 2349.65  | 6080.80  | 13614.20  | 34124.54  | 0.62 | 7.24  | 15.62 | 31.38  | 68.97  |
| 0.22 | 1943.48  | 4979.51  | 11292.34  | 28082.54  | 0.63 | 6.40  | 13.49 | 27.28  | 60.09  |
| 0.23 | 1631.79  | 4145.85  | 9555.16   | 23718.00  | 0.64 | 5.57  | 11.66 | 23.12  | 52.13  |
| 0.24 | 1360.01  | 3515.66  | 7918.74   | 19501.09  | 0.65 | 4.83  | 10.13 | 19.88  | 44.29  |
| 0.25 | 1157.55  | 2959.30  | 6619.65   | 16719.96  | 0.66 | 4.17  | 8.69  | 16.95  | 38.40  |
| 0.26 | 971.98   | 2539.20  | 5667.25   | 14301.49  | 0.67 | 3.64  | 7.44  | 14.41  | 32.93  |
| 0.27 | 826.20   | 2163.12  | 4700.00   | 12080.87  | 0.68 | 3.19  | 6.40  | 12.26  | 27.64  |
| 0.28 | 705.07   | 1795.72  | 3937.98   | 10142.88  | 0.69 | 2.75  | 5.53  | 10.57  | 23.12  |
| 0.29 | 604.72   | 1516.70  | 3364.59   | 8555.18   | 0.70 | 2.39  | 4.73  | 8.94   | 20.00  |
| 0.30 | 515.84   | 1291.43  | 2884.02   | 7600.32   | 0.71 | 2.05  | 4.05  | 7.58   | 16.56  |
| 0.31 | 438.52   | 1100.21  | 2482.13   | 6280.10   | 0.72 | 1.78  | 3.47  | 6.40   | 13.89  |
| 0.32 | 379.07   | 946.43   | 2128.73   | 5424.69   | 0.73 | 1.52  | 2.96  | 5.41   | 11.50  |
| 0.33 | 326.66   | 814.34   | 1821.38   | 4550.13   | 0.74 | 1.30  | 2.51  | 4.51   | 9.54   |
| 0.34 | 285.89   | 698.56   | 1531.43   | 3954.42   | 0.75 | 1.13  | 2.12  | 3.80   | 7.78   |
| 0.35 | 248.28   | 601.21   | 1317.35   | 3268.16   | 0.76 | 0.96  | 1.79  | 3.19   | 6.54   |
| 0.36 | 213.76   | 524.18   | 1140.22   | 2745.43   | 0.77 | 0.81  | 1.51  | 2.65   | 5.39   |
| 0.37 | 187.04   | 454.34   | 991.77    | 2392.87   | 0.78 | 0.69  | 1.28  | 2.23   | 4.52   |
| 0.38 | 164.06   | 396.84   | 851.72    | 2034.55   | 0.79 | 0.58  | 1.06  | 1.83   | 3.60   |
| 0.39 | 143.35   | 341.57   | 730.30    | 1764.83   | 0.80 | 0.49  | 0.87  | 1.50   | 2.94   |
| 0.40 | 125.61   | 304.88   | 644.27    | 1512.92   | 0.81 | 0.41  | 0.73  | 1.22   | 2.37   |
| 0.41 | 109.25   | 262.67   | 567.11    | 1326.78   | 0.82 | 0.34  | 0.60  | 0.99   | 1.90   |
| 0.42 | 95.18    | 229.54   | 487.23    | 1166.36   | 0.83 | 0.28  | 0.49  | 0.81   | 1.53   |
| 0.43 | 83.83    | 199.87   | 422.59    | 1006.45   | 0.84 | 0.23  | 0.40  | 0.65   | 1.23   |
| 0.44 | 73.43    | 173.00   | 366.64    | 885.31    | 0.85 | 0.19  | 0.32  | 0.53   | 0.97   |
| 0.45 | 64.50    | 151.25   | 321.53    | 760.04    | 0.86 | 0.16  | 0.26  | 0.42   | 0.75   |
| 0.46 | 56.77    | 131.64   | 280.75    | 662.33    | 0.87 | 0.13  | 0.21  | 0.32   | 0.58   |
| 0.47 | 50.47    | 115.32   | 244.99    | 580.71    | 0.88 | 0.10  | 0.16  | 0.25   | 0.45   |
| 0.48 | 44.84    | 101.29   | 210.73    | 503.22    | 0.89 | 0.08  | 0.13  | 0.20   | 0.33   |
| 0.49 | 39.38    | 88.52    | 184.19    | 435.22    | 0.90 | 0.06  | 0.10  | 0.15   | 0.24   |
| 0.50 | 34.64    | 77.91    | 159.88    | 375.12    |      |       |       |        |        |

Table S47: Critical values for detector  $\hat{H}^m$  and IM-OLS estimation in a model with intercept. The number of integrated regressors is 3 and the highest power of  $x_{kt}$  is 2.



| m    | 90 %     | 95 %     | 97,5 %    | 99 %      | m    | 90 %  | 95 %  | 97,5 % | 99 %   |
|------|----------|----------|-----------|-----------|------|-------|-------|--------|--------|
| 0.10 | 33209.40 | 65561.94 | 126267.05 | 278913.65 | 0.51 | 21.72 | 38.57 | 66.39  | 131.56 |
| 0.11 | 23380.07 | 46235.11 | 87307.92  | 191132.66 | 0.52 | 18.92 | 33.87 | 57.72  | 115.92 |
| 0.12 | 17143.93 | 33582.42 | 62191.95  | 142475.93 | 0.53 | 16.68 | 29.86 | 50.33  | 98.17  |
| 0.13 | 12608.17 | 24398.51 | 45290.82  | 100657.50 | 0.54 | 14.71 | 26.13 | 43.70  | 86.97  |
| 0.14 | 9520.20  | 18648.72 | 33942.65  | 74048.85  | 0.55 | 12.86 | 22.86 | 37.98  | 73.87  |
| 0.15 | 7378.39  | 14347.66 | 26158.73  | 56437.15  | 0.56 | 11.27 | 19.86 | 33.43  | 63.49  |
| 0.16 | 5775.78  | 11171.16 | 20607.13  | 43543.91  | 0.57 | 9.86  | 17.44 | 28.99  | 55.44  |
| 0.17 | 4592.52  | 8800.35  | 15860.18  | 33943.36  | 0.58 | 8.65  | 15.28 | 25.44  | 47.57  |
| 0.18 | 3646.06  | 6885.23  | 12611.89  | 27211.28  | 0.59 | 7.53  | 13.24 | 21.87  | 40.77  |
| 0.19 | 2911.72  | 5531.26  | 10165.30  | 21348.18  | 0.60 | 6.57  | 11.56 | 19.34  | 35.59  |
| 0.20 | 2344.62  | 4528.92  | 8286.89   | 17593.36  | 0.61 | 5.78  | 10.13 | 16.98  | 31.43  |
| 0.21 | 1924.18  | 3651.93  | 6619.44   | 14465.22  | 0.62 | 5.05  | 8.80  | 14.62  | 27.59  |
| 0.22 | 1572.00  | 2985.28  | 5448.64   | 11940.30  | 0.63 | 4.40  | 7.62  | 12.62  | 23.58  |
| 0.23 | 1321.09  | 2498.72  | 4550.01   | 9496.92   | 0.64 | 3.81  | 6.61  | 10.95  | 20.54  |
| 0.24 | 1101.20  | 2080.41  | 3752.02   | 7873.79   | 0.65 | 3.28  | 5.70  | 9.51   | 17.83  |
| 0.25 | 916.43   | 1749.49  | 3165.08   | 6677.62   | 0.66 | 2.83  | 4.83  | 8.12   | 15.13  |
| 0.26 | 768.98   | 1465.42  | 2653.46   | 5568.80   | 0.67 | 2.46  | 4.23  | 6.92   | 13.03  |
| 0.27 | 651.04   | 1231.39  | 2186.65   | 4700.85   | 0.68 | 2.13  | 3.62  | 5.84   | 11.08  |
| 0.28 | 555.81   | 1045.43  | 1874.43   | 3975.27   | 0.69 | 1.82  | 3.11  | 5.10   | 9.66   |
| 0.29 | 468.12   | 879.54   | 1586.37   | 3387.40   | 0.70 | 1.56  | 2.67  | 4.28   | 7.98   |
| 0.30 | 398.42   | 751.71   | 1348.24   | 2852.56   | 0.71 | 1.36  | 2.28  | 3.63   | 6.55   |
| 0.31 | 340.60   | 637.91   | 1139.40   | 2386.88   | 0.72 | 1.16  | 1.93  | 3.07   | 5.59   |
| 0.32 | 292.67   | 545.85   | 977.53    | 2023.82   | 0.73 | 0.99  | 1.64  | 2.57   | 4.66   |
| 0.33 | 251.20   | 469.31   | 841.94    | 1725.70   | 0.74 | 0.85  | 1.37  | 2.14   | 3.73   |
| 0.34 | 215.97   | 406.41   | 720.68    | 1497.33   | 0.75 | 0.72  | 1.17  | 1.80   | 3.20   |
| 0.35 | 186.85   | 349.46   | 619.24    | 1291.87   | 0.76 | 0.61  | 0.99  | 1.55   | 2.65   |
| 0.36 | 161.28   | 304.63   | 534.87    | 1104.54   | 0.77 | 0.51  | 0.83  | 1.26   | 2.14   |
| 0.37 | 141.53   | 259.75   | 459.68    | 947.46    | 0.78 | 0.43  | 0.69  | 1.06   | 1.83   |
| 0.38 | 122.50   | 225.21   | 394.18    | 809.40    | 0.79 | 0.35  | 0.56  | 0.87   | 1.45   |
| 0.39 | 106.39   | 195.04   | 349.20    | 705.99    | 0.80 | 0.30  | 0.47  | 0.71   | 1.17   |
| 0.40 | 92.95    | 171.53   | 301.32    | 608.58    | 0.81 | 0.24  | 0.39  | 0.57   | 0.95   |
| 0.41 | 80.86    | 148.03   | 262.58    | 537.04    | 0.82 | 0.20  | 0.31  | 0.47   | 0.77   |
| 0.42 | 70.74    | 128.69   | 231.56    | 455.97    | 0.83 | 0.17  | 0.26  | 0.37   | 0.60   |
| 0.43 | 61.84    | 111.97   | 198.32    | 401.72    | 0.84 | 0.14  | 0.21  | 0.31   | 0.49   |
| 0.44 | 54.27    | 98.24    | 171.27    | 346.59    | 0.85 | 0.11  | 0.17  | 0.24   | 0.37   |
| 0.45 | 47.51    | 85.25    | 149.63    | 299.97    | 0.86 | 0.09  | 0.13  | 0.19   | 0.29   |
| 0.46 | 41.59    | 75.16    | 130.01    | 259.34    | 0.87 | 0.07  | 0.10  | 0.14   | 0.22   |
| 0.47 | 36.70    | 65.13    | 114.54    | 226.08    | 0.88 | 0.05  | 0.08  | 0.11   | 0.16   |
| 0.48 | 32.14    | 57.83    | 100.95    | 199.99    | 0.89 | 0.04  | 0.06  | 0.08   | 0.12   |
| 0.49 | 27.94    | 50.60    | 88.85     | 177.14    | 0.90 | 0.03  | 0.04  | 0.06   | 0.09   |
| 0.50 | 24.61    | 44.21    | 76.96     | 151.43    |      |       |       |        |        |

Table S48: Critical values for detector  $\hat{H}^m$  and FM-OLS and D-OLS estimation in a model with intercept and linear trend. The number of integrated regressors is 3 and the highest power of  $x_{kt}$  is 2.

| m    | 90 %     | 95 %      | 97,5 %    | 99 %      | m    | 90 %  | 95 %  | 97,5 % | 99 %   |
|------|----------|-----------|-----------|-----------|------|-------|-------|--------|--------|
| 0.10 | 74866.71 | 156838.49 | 317131.01 | 736921.78 | 0.51 | 46.99 | 89.96 | 164.48 | 346.98 |
| 0.11 | 52702.41 | 110432.02 | 217082.37 | 501091.57 | 0.52 | 41.14 | 78.76 | 142.26 | 298.25 |
| 0.12 | 38306.84 | 79767.06  | 157835.44 | 370987.73 | 0.53 | 36.20 | 69.46 | 125.66 | 266.72 |
| 0.13 | 28803.04 | 59186.49  | 116157.70 | 258654.44 | 0.54 | 31.97 | 60.97 | 110.35 | 231.28 |
| 0.14 | 21460.20 | 45147.63  | 88484.26  | 207302.41 | 0.55 | 28.22 | 53.67 | 96.17  | 203.91 |
| 0.15 | 16535.22 | 34351.73  | 66635.86  | 155457.59 | 0.56 | 24.60 | 47.15 | 84.55  | 177.32 |
| 0.16 | 12690.76 | 26758.13  | 52365.06  | 122571.85 | 0.57 | 21.58 | 40.73 | 72.97  | 150.98 |
| 0.17 | 10049.65 | 20721.47  | 41144.27  | 92791.68  | 0.58 | 18.83 | 35.48 | 63.22  | 132.68 |
| 0.18 | 7990.06  | 16458.38  | 32584.22  | 74740.55  | 0.59 | 16.37 | 30.77 | 55.49  | 116.20 |
| 0.19 | 6388.15  | 13198.20  | 26158.85  | 60789.32  | 0.60 | 14.29 | 26.69 | 47.66  | 98.87  |
| 0.20 | 5177.18  | 10575.24  | 20835.01  | 48498.10  | 0.61 | 12.43 | 23.37 | 41.04  | 85.97  |
| 0.21 | 4176.35  | 8573.25   | 16767.05  | 37719.63  | 0.62 | 10.90 | 20.37 | 36.08  | 73.44  |
| 0.22 | 3435.19  | 7063.86   | 13841.99  | 30806.49  | 0.63 | 9.47  | 17.85 | 31.31  | 62.87  |
| 0.23 | 2861.12  | 5824.01   | 11381.92  | 25322.59  | 0.64 | 8.29  | 15.37 | 26.80  | 53.96  |
| 0.24 | 2392.36  | 4878.64   | 9306.07   | 20948.99  | 0.65 | 7.19  | 13.29 | 22.97  | 46.02  |
| 0.25 | 2004.77  | 4064.61   | 7780.62   | 17429.30  | 0.66 | 6.21  | 11.39 | 19.71  | 39.77  |
| 0.26 | 1703.68  | 3418.80   | 6683.01   | 14867.63  | 0.67 | 5.35  | 9.82  | 16.75  | 33.80  |
| 0.27 | 1437.03  | 2903.15   | 5672.67   | 12682.65  | 0.68 | 4.60  | 8.45  | 14.25  | 28.06  |
| 0.28 | 1219.41  | 2439.49   | 4585.57   | 10598.42  | 0.69 | 3.98  | 7.19  | 12.34  | 24.45  |
| 0.29 | 1038.69  | 2060.86   | 3890.19   | 9093.26   | 0.70 | 3.41  | 6.14  | 10.57  | 20.92  |
| 0.30 | 885.14   | 1747.75   | 3377.44   | 7772.85   | 0.71 | 2.92  | 5.23  | 9.04   | 17.39  |
| 0.31 | 758.50   | 1516.44   | 2923.88   | 6538.40   | 0.72 | 2.52  | 4.43  | 7.54   | 14.49  |
| 0.32 | 644.97   | 1302.71   | 2513.33   | 5457.68   | 0.73 | 2.14  | 3.76  | 6.38   | 12.04  |
| 0.33 | 552.30   | 1115.18   | 2124.89   | 4611.13   | 0.74 | 1.82  | 3.20  | 5.32   | 9.88   |
| 0.34 | 479.75   | 946.87    | 1819.13   | 4045.24   | 0.75 | 1.54  | 2.69  | 4.40   | 8.38   |
| 0.35 | 413.55   | 817.17    | 1538.84   | 3396.53   | 0.76 | 1.31  | 2.27  | 3.68   | 6.85   |
| 0.36 | 356.06   | 704.89    | 1319.85   | 2882.67   | 0.77 | 1.12  | 1.92  | 3.09   | 5.59   |
| 0.37 | 308.55   | 610.13    | 1153.97   | 2545.65   | 0.78 | 0.94  | 1.60  | 2.58   | 4.61   |
| 0.38 | 268.98   | 530.79    | 991.15    | 2175.50   | 0.79 | 0.79  | 1.33  | 2.12   | 3.82   |
| 0.39 | 235.31   | 457.76    | 850.56    | 1875.66   | 0.80 | 0.65  | 1.10  | 1.73   | 3.11   |
| 0.40 | 205.10   | 396.31    | 734.11    | 1610.39   | 0.81 | 0.54  | 0.90  | 1.41   | 2.55   |
| 0.41 | 180.38   | 346.32    | 636.37    | 1402.65   | 0.82 | 0.45  | 0.73  | 1.16   | 2.07   |
| 0.42 | 156.03   | 304.98    | 552.38    | 1206.57   | 0.83 | 0.36  | 0.60  | 0.94   | 1.64   |
| 0.43 | 135.06   | 262.09    | 486.92    | 1056.98   | 0.84 | 0.30  | 0.48  | 0.75   | 1.32   |
| 0.44 | 117.20   | 230.46    | 425.50    | 927.61    | 0.85 | 0.24  | 0.39  | 0.59   | 1.04   |
| 0.45 | 103.60   | 201.64    | 368.77    | 808.66    | 0.86 | 0.19  | 0.31  | 0.47   | 0.79   |
| 0.46 | 90.85    | 177.54    | 324.98    | 689.45    | 0.87 | 0.15  | 0.24  | 0.37   | 0.61   |
| 0.47 | 80.35    | 154.77    | 283.17    | 610.03    | 0.88 | 0.12  | 0.19  | 0.28   | 0.46   |
| 0.48 | 71.12    | 134.72    | 246.56    | 524.12    | 0.89 | 0.09  | 0.15  | 0.22   | 0.34   |
| 0.49 | 61.69    | 117.93    | 218.45    | 458.15    | 0.90 | 0.07  | 0.11  | 0.16   | 0.25   |
| 0.50 | 54.14    | 102.70    | 189.58    | 398.02    |      |       |       |        |        |

Table S49: Critical values for detector  $\hat{H}^m$  and IM-OLS estimation in a model with intercept and linear trend. The number of integrated regressors is 3 and the highest power of  $x_{kt}$  is 2.

| m    | 90 %       | 95 %       | 97,5 %      | 99 %        | m    | 90 %   | 95 %   | 97,5 %  | 99 %    |
|------|------------|------------|-------------|-------------|------|--------|--------|---------|---------|
| 0.10 | 1494856.94 | 5625351.33 | 16301287.50 | 53474471.10 | 0.51 | 105.40 | 373.65 | 1031.24 | 3091.74 |
| 0.11 | 970309.37  | 3539248.97 | 10619276.65 | 36529233.11 | 0.52 | 87.41  | 310.18 | 852.71  | 2585.61 |
| 0.12 | 654468.41  | 2313543.54 | 6994200.98  | 23489961.68 | 0.53 | 72.36  | 256.20 | 706.76  | 2166.52 |
| 0.13 | 445027.51  | 1610196.73 | 4758259.54  | 15771902.27 | 0.54 | 61.54  | 215.14 | 574.54  | 1798.69 |
| 0.14 | 303281.24  | 1113314.62 | 3276227.12  | 11232438.22 | 0.55 | 51.52  | 178.04 | 492.74  | 1513.51 |
| 0.15 | 219516.98  | 795801.78  | 2435848.42  | 8180239.73  | 0.56 | 43.02  | 145.00 | 405.69  | 1223.03 |
| 0.16 | 156829.51  | 581793.79  | 1700063.47  | 5746555.68  | 0.57 | 37.26  | 123.60 | 334.79  | 1016.82 |
| 0.17 | 116422.00  | 434617.01  | 1221361.39  | 4215988.59  | 0.58 | 31.40  | 101.93 | 283.85  | 891.50  |
| 0.18 | 86250.92   | 325415.96  | 938171.99   | 3092304.78  | 0.59 | 26.05  | 84.71  | 236.82  | 723.26  |
| 0.19 | 65046.62   | 243472.31  | 703386.47   | 2371528.56  | 0.60 | 21.53  | 70.89  | 197.05  | 616.93  |
| 0.20 | 49826.56   | 185241.29  | 527831.14   | 1744763.39  | 0.61 | 18.16  | 60.68  | 167.85  | 525.75  |
| 0.21 | 38120.63   | 141478.39  | 407632.40   | 1394409.37  | 0.62 | 15.28  | 50.50  | 136.93  | 428.80  |
| 0.22 | 29286.43   | 110767.73  | 315928.82   | 1024220.46  | 0.63 | 12.82  | 41.49  | 110.15  | 340.87  |
| 0.23 | 23062.99   | 85989.35   | 253628.79   | 811675.12   | 0.64 | 10.57  | 34.40  | 89.80   | 281.89  |
| 0.24 | 18253.15   | 67648.80   | 195814.56   | 649123.56   | 0.65 | 8.76   | 28.50  | 74.32   | 225.17  |
| 0.25 | 14648.89   | 54370.53   | 156233.68   | 511213.41   | 0.66 | 7.20   | 22.72  | 60.31   | 181.63  |
| 0.26 | 11763.54   | 42956.54   | 125509.00   | 395671.66   | 0.67 | 6.03   | 18.96  | 49.50   | 148.16  |
| 0.27 | 9201.92    | 33886.02   | 99595.56    | 313553.03   | 0.68 | 5.04   | 15.17  | 40.11   | 119.69  |
| 0.28 | 7469.92    | 27876.94   | 78593.23    | 254423.35   | 0.69 | 4.09   | 12.62  | 33.39   | 91.79   |
| 0.29 | 6109.02    | 22307.19   | 64333.68    | 197280.37   | 0.70 | 3.40   | 10.40  | 26.59   | 75.25   |
| 0.30 | 4938.27    | 17979.19   | 53036.96    | 161261.59   | 0.71 | 2.80   | 8.23   | 20.99   | 61.98   |
| 0.31 | 4017.68    | 14377.45   | 42130.49    | 136491.19   | 0.72 | 2.33   | 6.78   | 16.96   | 48.65   |
| 0.32 | 3307.65    | 11784.96   | 34963.30    | 111349.84   | 0.73 | 1.91   | 5.57   | 14.13   | 41.02   |
| 0.33 | 2694.86    | 9609.38    | 28792.77    | 90014.91    | 0.74 | 1.55   | 4.48   | 11.03   | 32.16   |
| 0.34 | 2184.75    | 7874.19    | 23571.33    | 70602.88    | 0.75 | 1.27   | 3.55   | 8.83    | 25.64   |
| 0.35 | 1834.57    | 6528.55    | 19311.44    | 59304.18    | 0.76 | 1.04   | 2.85   | 7.03    | 20.01   |
| 0.36 | 1521.88    | 5467.82    | 16243.99    | 48983.78    | 0.77 | 0.83   | 2.28   | 5.52    | 15.85   |
| 0.37 | 1269.70    | 4522.94    | 12987.51    | 41399.58    | 0.78 | 0.68   | 1.83   | 4.39    | 11.74   |
| 0.38 | 1035.39    | 3746.48    | 10887.40    | 33986.32    | 0.79 | 0.54   | 1.41   | 3.33    | 9.20    |
| 0.39 | 890.61     | 3122.95    | 8811.71     | 28141.63    | 0.80 | 0.44   | 1.12   | 2.64    | 6.98    |
| 0.40 | 741.07     | 2547.27    | 7446.10     | 23756.92    | 0.81 | 0.35   | 0.87   | 2.02    | 5.38    |
| 0.41 | 613.63     | 2189.07    | 5964.83     | 19769.24    | 0.82 | 0.27   | 0.67   | 1.58    | 4.09    |
| 0.42 | 515.49     | 1816.81    | 5000.87     | 16005.31    | 0.83 | 0.22   | 0.51   | 1.19    | 2.98    |
| 0.43 | 429.06     | 1504.11    | 4217.33     | 13021.13    | 0.84 | 0.17   | 0.38   | 0.88    | 2.19    |
| 0.44 | 358.59     | 1265.40    | 3494.09     | 10894.56    | 0.85 | 0.13   | 0.29   | 0.65    | 1.61    |
| 0.45 | 300.10     | 1055.47    | 2914.32     | 9129.51     | 0.86 | 0.10   | 0.21   | 0.45    | 1.17    |
| 0.46 | 251.80     | 884.22     | 2388.59     | 7308.88     | 0.87 | 0.08   | 0.16   | 0.32    | 0.80    |
| 0.47 | 212.47     | 740.81     | 1989.19     | 6178.49     | 0.88 | 0.06   | 0.11   | 0.23    | 0.55    |
| 0.48 | 179.98     | 628.62     | 1708.12     | 5211.45     | 0.89 | 0.05   | 0.08   | 0.16    | 0.37    |
| 0.49 | 150.86     | 532.03     | 1489.10     | 4493.46     | 0.90 | 0.03   | 0.06   | 0.11    | 0.24    |
| 0.50 | 126.36     | 441.76     | 1279.32     | 3778.16     |      |        |        |         |         |

Table S50: Critical values for detector  $\hat{H}^m$  and FM-OLS and D-OLS estimation in a model with intercept. The number of integrated regressors is 3 and the highest power of  $x_{kt}$  is 3.

| m    | 90 %       | 95 %        | 97,5 %      | 99 %         | m    | 90 %   | 95 %    | 97,5 %  | 99 %     |
|------|------------|-------------|-------------|--------------|------|--------|---------|---------|----------|
| 0.10 | 5199629.71 | 20392048.45 | 64678343.76 | 246531408.01 | 0.51 | 360.39 | 1328.95 | 3883.74 | 12947.40 |
| 0.11 | 3342879.76 | 13417595.89 | 42100242.90 | 156267164.63 | 0.52 | 300.08 | 1097.20 | 3278.00 | 10768.54 |
| 0.12 | 2230237.48 | 8825388.35  | 28148902.42 | 103577398.37 | 0.53 | 251.55 | 927.51  | 2738.83 | 8977.15  |
| 0.13 | 1512704.80 | 6001508.99  | 19220827.58 | 70329857.05  | 0.54 | 212.31 | 775.13  | 2295.80 | 7577.80  |
| 0.14 | 1048669.08 | 4131374.40  | 13140842.73 | 50763002.40  | 0.55 | 177.91 | 657.05  | 1921.00 | 6527.55  |
| 0.15 | 738465.23  | 2959042.81  | 9395771.82  | 34703183.71  | 0.56 | 148.77 | 556.19  | 1586.81 | 5297.02  |
| 0.16 | 539362.46  | 2107096.37  | 6931552.71  | 25499016.22  | 0.57 | 125.65 | 457.69  | 1342.92 | 4338.03  |
| 0.17 | 399020.57  | 1586404.15  | 4867636.08  | 17851268.82  | 0.58 | 106.09 | 378.39  | 1118.72 | 3529.33  |
| 0.18 | 299762.72  | 1179685.58  | 3757074.03  | 13588157.32  | 0.59 | 88.88  | 321.79  | 948.85  | 2940.31  |
| 0.19 | 226436.24  | 885042.99   | 2762633.06  | 10081911.66  | 0.60 | 74.06  | 269.25  | 770.37  | 2512.33  |
| 0.20 | 169058.74  | 680517.97   | 2101161.52  | 7837756.59   | 0.61 | 61.44  | 224.47  | 643.69  | 2096.08  |
| 0.21 | 132509.34  | 515820.36   | 1603806.69  | 5916375.44   | 0.62 | 51.53  | 189.23  | 541.24  | 1792.41  |
| 0.22 | 100610.03  | 396343.76   | 1219414.95  | 4474905.60   | 0.63 | 42.99  | 156.79  | 446.58  | 1459.53  |
| 0.23 | 78425.72   | 302179.35   | 968329.77   | 3505047.28   | 0.64 | 35.26  | 126.52  | 376.80  | 1197.16  |
| 0.24 | 62010.47   | 245434.40   | 774916.45   | 2754355.75   | 0.65 | 29.26  | 103.15  | 305.20  | 976.35   |
| 0.25 | 49149.59   | 198998.66   | 630020.80   | 2231666.30   | 0.66 | 24.48  | 84.71   | 249.18  | 807.81   |
| 0.26 | 38809.22   | 151985.51   | 481454.93   | 1801257.23   | 0.67 | 19.98  | 70.89   | 203.75  | 654.80   |
| 0.27 | 31082.06   | 121316.36   | 377982.85   | 1399076.19   | 0.68 | 16.41  | 57.99   | 162.25  | 554.43   |
| 0.28 | 24825.45   | 97857.89    | 305334.23   | 1138146.72   | 0.69 | 13.47  | 47.14   | 133.62  | 454.91   |
| 0.29 | 20340.48   | 80196.58    | 243220.25   | 873566.61    | 0.70 | 10.99  | 37.96   | 105.71  | 340.16   |
| 0.30 | 16477.26   | 63874.25    | 192435.37   | 698527.49    | 0.71 | 9.10   | 30.87   | 85.40   | 273.11   |
| 0.31 | 13225.39   | 51191.25    | 158386.91   | 550612.79    | 0.72 | 7.41   | 25.13   | 69.61   | 216.97   |
| 0.32 | 11056.78   | 42485.17    | 128170.43   | 466249.64    | 0.73 | 6.01   | 20.18   | 55.22   | 175.91   |
| 0.33 | 9192.55    | 34944.85    | 107312.72   | 390459.25    | 0.74 | 4.85   | 16.45   | 44.19   | 141.96   |
| 0.34 | 7577.22    | 28923.41    | 89515.75    | 305607.49    | 0.75 | 3.95   | 12.95   | 34.99   | 110.84   |
| 0.35 | 6372.40    | 23863.12    | 71854.97    | 248507.51    | 0.76 | 3.22   | 10.31   | 28.09   | 84.03    |
| 0.36 | 5215.39    | 20075.56    | 60278.38    | 208107.41    | 0.77 | 2.60   | 8.12    | 22.27   | 67.63    |
| 0.37 | 4319.55    | 16400.99    | 50415.75    | 168002.48    | 0.78 | 2.08   | 6.36    | 17.38   | 52.92    |
| 0.38 | 3633.69    | 13429.05    | 41814.29    | 145096.27    | 0.79 | 1.65   | 5.05    | 13.17   | 40.85    |
| 0.39 | 3022.18    | 11322.07    | 33209.35    | 120661.21    | 0.80 | 1.31   | 3.91    | 10.14   | 30.75    |
| 0.40 | 2546.43    | 9552.50     | 27986.98    | 99935.21     | 0.81 | 1.03   | 3.00    | 8.02    | 23.74    |
| 0.41 | 2110.05    | 7891.78     | 23595.93    | 82975.98     | 0.82 | 0.81   | 2.28    | 6.05    | 17.44    |
| 0.42 | 1765.81    | 6535.99     | 20164.36    | 68253.46     | 0.83 | 0.64   | 1.75    | 4.55    | 12.82    |
| 0.43 | 1469.75    | 5502.93     | 16189.34    | 56814.23     | 0.84 | 0.49   | 1.33    | 3.30    | 9.43     |
| 0.44 | 1220.15    | 4518.57     | 13547.11    | 46876.27     | 0.85 | 0.38   | 0.98    | 2.47    | 6.95     |
| 0.45 | 999.57     | 3735.66     | 11279.98    | 37370.90     | 0.86 | 0.29   | 0.73    | 1.75    | 5.01     |
| 0.46 | 827.97     | 3170.71     | 9458.37     | 30902.31     | 0.87 | 0.22   | 0.54    | 1.25    | 3.41     |
| 0.47 | 696.83     | 2673.39     | 7948.21     | 26509.32     | 0.88 | 0.17   | 0.39    | 0.88    | 2.40     |
| 0.48 | 595.44     | 2220.94     | 6645.16     | 22007.15     | 0.89 | 0.13   | 0.28    | 0.64    | 1.61     |
| 0.49 | 506.05     | 1875.21     | 5595.22     | 18483.99     | 0.90 | 0.09   | 0.20    | 0.43    | 1.05     |
| 0.50 | 430.06     | 1585.53     | 4659.92     | 15475.87     |      |        |         |         |          |

Table S51: Critical values for detector  $\hat{H}^m$  and IM-OLS estimation in a model with intercept. The number of integrated regressors is 3 and the highest power of  $x_{kt}$  is 3.

| m    | 90 %       | 95 %       | 97,5 %      | 99 %        | m    | 90 %   | 95 %   | 97,5 %  | 99 %    |
|------|------------|------------|-------------|-------------|------|--------|--------|---------|---------|
| 0.10 | 2072868.03 | 7279564.48 | 19957092.47 | 61786902.11 | 0.51 | 117.30 | 393.58 | 1081.58 | 3268.83 |
| 0.11 | 1319266.06 | 4559886.75 | 12904729.01 | 41701761.95 | 0.52 | 97.63  | 328.05 | 901.24  | 2654.46 |
| 0.12 | 876312.14  | 2959415.20 | 8444485.01  | 26264037.72 | 0.53 | 81.28  | 268.74 | 737.57  | 2226.44 |
| 0.13 | 590106.18  | 1971284.42 | 5655119.23  | 18101368.30 | 0.54 | 68.53  | 227.34 | 610.07  | 1870.01 |
| 0.14 | 388830.16  | 1354256.58 | 3865884.77  | 12661467.56 | 0.55 | 57.78  | 191.14 | 521.18  | 1561.64 |
| 0.15 | 276813.88  | 958870.98  | 2801430.36  | 8977063.49  | 0.56 | 48.56  | 156.80 | 420.30  | 1265.84 |
| 0.16 | 200090.83  | 693252.72  | 1968503.57  | 6405601.00  | 0.57 | 42.05  | 131.11 | 353.74  | 1065.09 |
| 0.17 | 144422.72  | 514406.68  | 1407564.68  | 4581090.83  | 0.58 | 35.25  | 109.60 | 298.08  | 919.63  |
| 0.18 | 108527.96  | 377668.66  | 1070994.80  | 3343643.37  | 0.59 | 29.41  | 91.20  | 249.56  | 758.36  |
| 0.19 | 80400.57   | 278776.68  | 807225.58   | 2586976.98  | 0.60 | 24.75  | 76.44  | 206.46  | 633.17  |
| 0.20 | 60872.60   | 214095.61  | 594147.70   | 1910246.36  | 0.61 | 20.72  | 64.99  | 173.71  | 533.81  |
| 0.21 | 46228.66   | 162327.77  | 453621.07   | 1518710.84  | 0.62 | 17.42  | 54.52  | 145.34  | 435.76  |
| 0.22 | 35461.33   | 125299.51  | 357020.73   | 1110584.98  | 0.63 | 14.63  | 44.38  | 115.62  | 350.05  |
| 0.23 | 27399.03   | 96782.81   | 277227.97   | 877425.94   | 0.64 | 12.09  | 36.24  | 96.01   | 291.17  |
| 0.24 | 21496.04   | 76338.48   | 214957.72   | 696581.17   | 0.65 | 10.13  | 29.81  | 78.23   | 233.41  |
| 0.25 | 17245.51   | 60430.03   | 171195.95   | 549613.33   | 0.66 | 8.48   | 24.60  | 64.17   | 184.82  |
| 0.26 | 13536.27   | 48596.15   | 134069.30   | 426878.07   | 0.67 | 7.05   | 20.37  | 51.87   | 151.88  |
| 0.27 | 10770.55   | 38469.85   | 107755.87   | 341471.02   | 0.68 | 5.84   | 16.37  | 41.97   | 122.83  |
| 0.28 | 8669.09    | 31169.69   | 84824.74    | 276116.74   | 0.69 | 4.83   | 13.61  | 35.01   | 95.73   |
| 0.29 | 7040.60    | 24335.36   | 68113.00    | 209822.41   | 0.70 | 4.04   | 11.28  | 28.58   | 80.09   |
| 0.30 | 5592.07    | 19787.51   | 56744.52    | 169941.38   | 0.71 | 3.37   | 9.02   | 22.85   | 64.24   |
| 0.31 | 4566.59    | 15938.81   | 44581.50    | 146734.19   | 0.72 | 2.79   | 7.24   | 18.27   | 51.40   |
| 0.32 | 3768.87    | 12924.07   | 37773.17    | 116713.26   | 0.73 | 2.29   | 6.01   | 15.22   | 42.58   |
| 0.33 | 3064.96    | 10686.36   | 30758.96    | 94226.80    | 0.74 | 1.89   | 4.83   | 11.63   | 34.12   |
| 0.34 | 2465.48    | 8574.17    | 25063.62    | 73372.56    | 0.75 | 1.56   | 3.87   | 9.24    | 26.53   |
| 0.35 | 2080.59    | 7101.46    | 20172.59    | 62487.82    | 0.76 | 1.27   | 3.10   | 7.51    | 21.10   |
| 0.36 | 1691.64    | 5979.53    | 17094.36    | 51542.94    | 0.77 | 1.03   | 2.51   | 5.85    | 16.65   |
| 0.37 | 1443.59    | 4918.48    | 14108.64    | 42861.66    | 0.78 | 0.84   | 2.01   | 4.59    | 12.07   |
| 0.38 | 1167.78    | 4024.08    | 11593.55    | 36087.64    | 0.79 | 0.67   | 1.57   | 3.63    | 9.58    |
| 0.39 | 996.67     | 3373.94    | 9498.84     | 29568.96    | 0.80 | 0.54   | 1.24   | 2.80    | 7.17    |
| 0.40 | 820.89     | 2817.88    | 7662.60     | 24611.71    | 0.81 | 0.44   | 0.97   | 2.13    | 5.50    |
| 0.41 | 683.77     | 2329.71    | 6352.38     | 20431.52    | 0.82 | 0.35   | 0.75   | 1.68    | 4.27    |
| 0.42 | 569.70     | 1919.55    | 5256.99     | 17044.03    | 0.83 | 0.27   | 0.57   | 1.25    | 3.15    |
| 0.43 | 472.76     | 1608.62    | 4387.08     | 13724.65    | 0.84 | 0.22   | 0.43   | 0.92    | 2.28    |
| 0.44 | 400.12     | 1352.54    | 3702.38     | 11685.80    | 0.85 | 0.17   | 0.33   | 0.68    | 1.71    |
| 0.45 | 330.02     | 1128.77    | 3075.68     | 9654.06     | 0.86 | 0.13   | 0.24   | 0.48    | 1.18    |
| 0.46 | 279.37     | 942.73     | 2525.85     | 7762.34     | 0.87 | 0.10   | 0.18   | 0.34    | 0.84    |
| 0.47 | 235.67     | 786.86     | 2108.34     | 6659.38     | 0.88 | 0.07   | 0.13   | 0.25    | 0.58    |
| 0.48 | 197.51     | 668.59     | 1790.34     | 5523.50     | 0.89 | 0.06   | 0.10   | 0.17    | 0.38    |
| 0.49 | 165.69     | 565.68     | 1549.18     | 4712.04     | 0.90 | 0.04   | 0.07   | 0.12    | 0.25    |
| 0.50 | 138.32     | 469.74     | 1343.10     | 3930.36     |      |        |        |         |         |

Table S52: Critical values for detector  $\hat{H}^m$  and FM-OLS and D-OLS estimation in a model with intercept and linear trend. The number of integrated regressors is 3 and the highest power of  $x_{kt}$  is 3.

| m    | 90 %       | 95 %        | 97,5 %      | 99 %         | m    | 90 %   | 95 %    | 97,5 %  | 99 %     |
|------|------------|-------------|-------------|--------------|------|--------|---------|---------|----------|
| 0.10 | 6671346.68 | 24078961.39 | 71698634.39 | 256314304.60 | 0.51 | 356.94 | 1274.41 | 3700.64 | 12303.34 |
| 0.11 | 4151595.58 | 15378526.30 | 46037465.54 | 154857763.95 | 0.52 | 298.38 | 1049.67 | 3102.42 | 10409.42 |
| 0.12 | 2754939.71 | 10000355.23 | 30555054.90 | 105492512.71 | 0.53 | 252.17 | 885.14  | 2581.34 | 8569.94  |
| 0.13 | 1790528.62 | 6739365.26  | 20241270.19 | 70636473.89  | 0.54 | 212.07 | 756.62  | 2186.06 | 7288.15  |
| 0.14 | 1221784.78 | 4587035.61  | 13831096.82 | 48403234.93  | 0.55 | 177.67 | 642.26  | 1832.17 | 6130.76  |
| 0.15 | 857234.84  | 3218852.26  | 9878371.99  | 35011559.20  | 0.56 | 151.61 | 521.02  | 1511.69 | 5184.92  |
| 0.16 | 616247.17  | 2288771.90  | 7038104.45  | 25293785.65  | 0.57 | 128.05 | 437.14  | 1254.57 | 4086.36  |
| 0.17 | 447219.87  | 1680711.18  | 5064381.03  | 17714191.75  | 0.58 | 106.35 | 364.81  | 1037.12 | 3342.89  |
| 0.18 | 334292.54  | 1266768.47  | 3873886.52  | 12474447.16  | 0.59 | 89.58  | 308.49  | 909.40  | 2788.85  |
| 0.19 | 250092.19  | 944595.39   | 2799590.84  | 9884891.84   | 0.60 | 75.88  | 258.11  | 746.37  | 2260.29  |
| 0.20 | 188507.76  | 718222.99   | 2102591.04  | 7720952.52   | 0.61 | 63.41  | 217.17  | 614.44  | 1966.79  |
| 0.21 | 145721.65  | 541888.96   | 1632828.06  | 5508547.07   | 0.62 | 53.57  | 180.53  | 520.52  | 1643.26  |
| 0.22 | 112673.62  | 420782.45   | 1284507.73  | 4212958.04   | 0.63 | 44.24  | 149.12  | 427.71  | 1349.65  |
| 0.23 | 85312.13   | 325437.36   | 973400.68   | 3328316.59   | 0.64 | 36.00  | 123.03  | 351.25  | 1100.11  |
| 0.24 | 67339.10   | 255010.46   | 776982.11   | 2635573.21   | 0.65 | 30.18  | 101.59  | 290.26  | 902.44   |
| 0.25 | 53354.77   | 201927.56   | 618683.61   | 2165998.68   | 0.66 | 25.02  | 83.25   | 237.00  | 725.23   |
| 0.26 | 41931.69   | 156726.53   | 484482.15   | 1744709.02   | 0.67 | 20.44  | 67.73   | 196.32  | 597.67   |
| 0.27 | 33297.38   | 121062.56   | 376564.29   | 1382491.20   | 0.68 | 16.91  | 55.13   | 158.94  | 501.79   |
| 0.28 | 26729.22   | 100095.66   | 293053.04   | 1081736.62   | 0.69 | 13.84  | 44.97   | 126.24  | 419.89   |
| 0.29 | 21575.59   | 80300.69    | 236597.17   | 838806.35    | 0.70 | 11.38  | 36.42   | 101.49  | 334.37   |
| 0.30 | 17268.92   | 64098.40    | 190899.90   | 657866.84    | 0.71 | 9.40   | 29.16   | 81.23   | 266.12   |
| 0.31 | 14064.54   | 51604.45    | 152282.15   | 523525.55    | 0.72 | 7.75   | 23.56   | 66.08   | 209.88   |
| 0.32 | 11399.99   | 41813.59    | 125462.91   | 446428.99    | 0.73 | 6.38   | 19.12   | 52.28   | 169.22   |
| 0.33 | 9397.67    | 34885.13    | 105233.27   | 364930.03    | 0.74 | 5.19   | 15.33   | 41.59   | 132.67   |
| 0.34 | 7762.10    | 28502.36    | 86276.85    | 291737.44    | 0.75 | 4.20   | 12.19   | 32.87   | 100.99   |
| 0.35 | 6414.66    | 22929.13    | 69786.03    | 240968.80    | 0.76 | 3.40   | 9.90    | 26.61   | 81.25    |
| 0.36 | 5343.33    | 19029.02    | 57248.25    | 193401.99    | 0.77 | 2.78   | 7.87    | 20.66   | 65.63    |
| 0.37 | 4447.12    | 15969.28    | 46446.97    | 156304.80    | 0.78 | 2.23   | 6.13    | 16.50   | 50.11    |
| 0.38 | 3654.92    | 13435.38    | 39339.90    | 128961.76    | 0.79 | 1.80   | 4.86    | 12.55   | 37.80    |
| 0.39 | 3066.65    | 11277.90    | 31463.20    | 108112.57    | 0.80 | 1.43   | 3.79    | 9.61    | 28.70    |
| 0.40 | 2540.31    | 9386.38     | 26420.54    | 88618.67     | 0.81 | 1.13   | 2.91    | 7.35    | 21.44    |
| 0.41 | 2089.17    | 7746.01     | 22138.57    | 72749.36     | 0.82 | 0.90   | 2.24    | 5.51    | 15.73    |
| 0.42 | 1753.40    | 6411.02     | 18707.99    | 62618.26     | 0.83 | 0.72   | 1.71    | 4.13    | 11.64    |
| 0.43 | 1449.83    | 5276.94     | 15711.86    | 53274.35     | 0.84 | 0.55   | 1.30    | 3.04    | 8.38     |
| 0.44 | 1208.15    | 4418.51     | 13093.99    | 42340.14     | 0.85 | 0.43   | 0.98    | 2.21    | 6.19     |
| 0.45 | 1002.50    | 3653.58     | 10930.18    | 35521.64     | 0.86 | 0.33   | 0.73    | 1.62    | 4.28     |
| 0.46 | 829.26     | 3034.90     | 9306.07     | 28936.59     | 0.87 | 0.25   | 0.54    | 1.16    | 3.00     |
| 0.47 | 698.09     | 2637.53     | 7767.84     | 24732.02     | 0.88 | 0.19   | 0.40    | 0.84    | 2.05     |
| 0.48 | 591.48     | 2194.55     | 6376.08     | 21233.65     | 0.89 | 0.14   | 0.28    | 0.59    | 1.45     |
| 0.49 | 500.73     | 1852.18     | 5326.35     | 17883.87     | 0.90 | 0.11   | 0.20    | 0.41    | 0.97     |
| 0.50 | 423.59     | 1538.15     | 4410.52     | 14450.20     |      |        |         |         |          |

Table S53: Critical values for detector  $\hat{H}^m$  and IM-OLS estimation in a model with intercept and linear trend. The number of integrated regressors is 3 and the highest power of  $x_{kt}$  is 3.

#### 1.4 Number of I(1) regressors: 4

| m    | 90 %    | 95 %    | 97,5 %  | 99 %    | m    | 90 % | 95 %  | 97,5 % | 99 %  |
|------|---------|---------|---------|---------|------|------|-------|--------|-------|
| 0.10 | 1328.32 | 2191.16 | 3260.74 | 5107.97 | 0.51 | 6.34 | 10.09 | 14.79  | 22.25 |
| 0.11 | 1060.50 | 1732.08 | 2592.90 | 4012.28 | 0.52 | 5.69 | 9.09  | 13.21  | 20.23 |
| 0.12 | 859.92  | 1403.18 | 2091.79 | 3275.96 | 0.53 | 5.13 | 8.10  | 11.82  | 18.14 |
| 0.13 | 701.45  | 1152.63 | 1724.17 | 2692.57 | 0.54 | 4.56 | 7.26  | 10.64  | 16.15 |
| 0.14 | 579.31  | 943.56  | 1429.80 | 2228.09 | 0.55 | 4.11 | 6.52  | 9.48   | 14.31 |
| 0.15 | 484.69  | 794.99  | 1195.10 | 1869.19 | 0.56 | 3.71 | 5.85  | 8.47   | 12.73 |
| 0.16 | 407.74  | 673.41  | 1003.58 | 1564.16 | 0.57 | 3.31 | 5.27  | 7.62   | 11.29 |
| 0.17 | 344.79  | 567.91  | 851.61  | 1308.58 | 0.58 | 2.95 | 4.67  | 6.76   | 10.08 |
| 0.18 | 294.11  | 484.08  | 724.39  | 1113.89 | 0.59 | 2.65 | 4.18  | 6.04   | 9.04  |
| 0.19 | 252.13  | 409.70  | 618.15  | 973.97  | 0.60 | 2.39 | 3.76  | 5.42   | 7.98  |
| 0.20 | 217.86  | 354.57  | 526.42  | 826.62  | 0.61 | 2.13 | 3.36  | 4.80   | 7.11  |
| 0.21 | 190.53  | 310.68  | 455.75  | 705.50  | 0.62 | 1.90 | 2.99  | 4.30   | 6.34  |
| 0.22 | 166.52  | 270.15  | 399.67  | 619.04  | 0.63 | 1.70 | 2.64  | 3.80   | 5.67  |
| 0.23 | 145.67  | 236.23  | 354.30  | 543.34  | 0.64 | 1.51 | 2.34  | 3.36   | 4.98  |
| 0.24 | 126.96  | 209.01  | 309.30  | 481.60  | 0.65 | 1.33 | 2.08  | 2.95   | 4.39  |
| 0.25 | 111.45  | 183.24  | 273.45  | 424.63  | 0.66 | 1.18 | 1.84  | 2.63   | 3.87  |
| 0.26 | 98.41   | 161.16  | 244.20  | 376.75  | 0.67 | 1.05 | 1.61  | 2.30   | 3.40  |
| 0.27 | 87.64   | 142.98  | 213.97  | 329.73  | 0.68 | 0.93 | 1.42  | 2.02   | 3.01  |
| 0.28 | 77.55   | 127.39  | 188.28  | 292.07  | 0.69 | 0.82 | 1.26  | 1.78   | 2.64  |
| 0.29 | 68.24   | 112.62  | 169.41  | 259.62  | 0.70 | 0.73 | 1.12  | 1.57   | 2.30  |
| 0.30 | 59.89   | 98.68   | 146.84  | 227.33  | 0.71 | 0.64 | 0.97  | 1.37   | 2.01  |
| 0.31 | 53.77   | 87.71   | 130.50  | 203.56  | 0.72 | 0.55 | 0.84  | 1.19   | 1.75  |
| 0.32 | 48.05   | 78.51   | 116.12  | 181.18  | 0.73 | 0.49 | 0.74  | 1.03   | 1.52  |
| 0.33 | 43.12   | 70.10   | 102.80  | 161.08  | 0.74 | 0.43 | 0.64  | 0.90   | 1.33  |
| 0.34 | 38.27   | 62.34   | 92.86   | 145.82  | 0.75 | 0.38 | 0.56  | 0.78   | 1.15  |
| 0.35 | 34.23   | 55.34   | 82.44   | 128.86  | 0.76 | 0.33 | 0.49  | 0.67   | 0.97  |
| 0.36 | 30.61   | 49.38   | 73.65   | 114.42  | 0.77 | 0.28 | 0.42  | 0.58   | 0.83  |
| 0.37 | 27.41   | 44.27   | 66.31   | 101.26  | 0.78 | 0.24 | 0.36  | 0.49   | 0.70  |
| 0.38 | 24.65   | 39.59   | 58.79   | 89.17   | 0.79 | 0.21 | 0.31  | 0.42   | 0.59  |
| 0.39 | 22.21   | 35.72   | 53.05   | 80.48   | 0.80 | 0.18 | 0.26  | 0.36   | 0.51  |
| 0.40 | 20.09   | 32.48   | 47.84   | 72.22   | 0.81 | 0.15 | 0.22  | 0.30   | 0.42  |
| 0.41 | 18.16   | 28.99   | 42.82   | 64.98   | 0.82 | 0.13 | 0.19  | 0.25   | 0.35  |
| 0.42 | 16.25   | 26.30   | 38.88   | 58.76   | 0.83 | 0.10 | 0.15  | 0.21   | 0.29  |
| 0.43 | 14.63   | 23.63   | 34.72   | 53.72   | 0.84 | 0.09 | 0.13  | 0.17   | 0.24  |
| 0.44 | 13.24   | 21.27   | 31.53   | 47.83   | 0.85 | 0.07 | 0.10  | 0.14   | 0.20  |
| 0.45 | 11.86   | 19.05   | 27.97   | 43.03   | 0.86 | 0.06 | 0.09  | 0.12   | 0.16  |
| 0.46 | 10.66   | 17.12   | 25.12   | 38.40   | 0.87 | 0.05 | 0.07  | 0.09   | 0.13  |
| 0.47 | 9.54    | 15.46   | 22.54   | 34.61   | 0.88 | 0.04 | 0.05  | 0.07   | 0.10  |
| 0.48 | 8.57    | 13.99   | 20.50   | 31.36   | 0.89 | 0.03 | 0.04  | 0.06   | 0.08  |
| 0.49 | 7.76    | 12.57   | 18.30   | 27.93   | 0.90 | 0.02 | 0.03  | 0.04   | 0.06  |
| 0.50 | 7.01    | 11.23   | 16.47   | 24.87   |      |      |       |        |       |

Table S54: Critical values for detector  $\hat{H}^m$  and FM-OLS and D-OLS estimation in a model with intercept. The number of integrated regressors is 4 and the highest power of  $x_{kt}$  is 1.

| m    | 90 %    | 95 %    | 97,5 %  | 99 %     | m    | 90 %  | 95 %  | 97,5 % | 99 %  |
|------|---------|---------|---------|----------|------|-------|-------|--------|-------|
| 0.10 | 2653.84 | 4542.57 | 7021.15 | 11468.71 | 0.51 | 12.55 | 20.76 | 31.34  | 49.91 |
| 0.11 | 2120.56 | 3623.66 | 5572.71 | 9190.33  | 0.52 | 11.35 | 18.60 | 28.34  | 44.73 |
| 0.12 | 1715.85 | 2914.80 | 4519.49 | 7293.93  | 0.53 | 10.22 | 16.74 | 25.41  | 40.35 |
| 0.13 | 1403.17 | 2377.44 | 3737.46 | 6017.25  | 0.54 | 9.18  | 15.15 | 22.85  | 36.46 |
| 0.14 | 1156.42 | 1948.73 | 3060.29 | 5162.25  | 0.55 | 8.24  | 13.55 | 20.45  | 32.61 |
| 0.15 | 956.73  | 1602.25 | 2588.90 | 4206.68  | 0.56 | 7.43  | 12.14 | 18.36  | 28.94 |
| 0.16 | 809.30  | 1373.60 | 2156.86 | 3539.95  | 0.57 | 6.70  | 10.92 | 16.31  | 25.42 |
| 0.17 | 686.77  | 1172.68 | 1823.46 | 2992.07  | 0.58 | 5.98  | 9.72  | 14.52  | 22.81 |
| 0.18 | 585.20  | 992.51  | 1556.94 | 2545.49  | 0.59 | 5.34  | 8.70  | 13.01  | 20.23 |
| 0.19 | 500.17  | 852.29  | 1328.71 | 2170.68  | 0.60 | 4.78  | 7.79  | 11.58  | 18.07 |
| 0.20 | 437.80  | 741.81  | 1137.71 | 1860.81  | 0.61 | 4.29  | 6.95  | 10.25  | 15.99 |
| 0.21 | 377.08  | 648.70  | 998.31  | 1625.41  | 0.62 | 3.82  | 6.21  | 9.08   | 14.22 |
| 0.22 | 326.08  | 559.25  | 862.00  | 1404.26  | 0.63 | 3.42  | 5.52  | 8.12   | 12.64 |
| 0.23 | 285.52  | 487.04  | 755.69  | 1239.00  | 0.64 | 3.05  | 4.91  | 7.32   | 11.11 |
| 0.24 | 251.29  | 429.30  | 662.44  | 1088.26  | 0.65 | 2.71  | 4.39  | 6.52   | 9.90  |
| 0.25 | 222.59  | 381.10  | 585.55  | 948.53   | 0.66 | 2.43  | 3.88  | 5.72   | 8.72  |
| 0.26 | 196.76  | 335.11  | 517.39  | 835.30   | 0.67 | 2.14  | 3.44  | 5.02   | 7.73  |
| 0.27 | 174.34  | 294.75  | 454.76  | 734.25   | 0.68 | 1.90  | 3.02  | 4.42   | 6.73  |
| 0.28 | 154.21  | 262.67  | 398.91  | 647.70   | 0.69 | 1.67  | 2.66  | 3.89   | 5.89  |
| 0.29 | 136.14  | 231.06  | 356.77  | 579.64   | 0.70 | 1.47  | 2.33  | 3.40   | 5.20  |
| 0.30 | 121.42  | 204.80  | 316.81  | 512.37   | 0.71 | 1.29  | 2.04  | 2.98   | 4.60  |
| 0.31 | 107.84  | 182.78  | 281.43  | 463.69   | 0.72 | 1.14  | 1.78  | 2.60   | 3.99  |
| 0.32 | 96.62   | 163.61  | 251.09  | 413.83   | 0.73 | 1.00  | 1.55  | 2.27   | 3.42  |
| 0.33 | 85.81   | 146.89  | 226.32  | 367.73   | 0.74 | 0.87  | 1.36  | 1.97   | 2.96  |
| 0.34 | 76.61   | 131.17  | 202.50  | 322.84   | 0.75 | 0.76  | 1.19  | 1.72   | 2.56  |
| 0.35 | 68.38   | 116.10  | 179.71  | 289.43   | 0.76 | 0.66  | 1.03  | 1.49   | 2.24  |
| 0.36 | 61.27   | 103.39  | 160.29  | 259.88   | 0.77 | 0.57  | 0.89  | 1.29   | 1.92  |
| 0.37 | 54.80   | 92.33   | 142.02  | 228.72   | 0.78 | 0.49  | 0.76  | 1.10   | 1.64  |
| 0.38 | 49.28   | 82.66   | 126.56  | 204.91   | 0.79 | 0.42  | 0.65  | 0.94   | 1.40  |
| 0.39 | 44.23   | 74.13   | 112.99  | 184.93   | 0.80 | 0.36  | 0.56  | 0.79   | 1.17  |
| 0.40 | 39.80   | 66.62   | 102.75  | 166.38   | 0.81 | 0.31  | 0.47  | 0.67   | 0.98  |
| 0.41 | 35.89   | 60.27   | 91.92   | 151.93   | 0.82 | 0.26  | 0.40  | 0.56   | 0.83  |
| 0.42 | 32.34   | 54.11   | 82.58   | 134.19   | 0.83 | 0.22  | 0.34  | 0.48   | 0.69  |
| 0.43 | 29.24   | 48.95   | 73.74   | 118.98   | 0.84 | 0.18  | 0.28  | 0.40   | 0.57  |
| 0.44 | 26.35   | 43.97   | 67.12   | 106.61   | 0.85 | 0.15  | 0.23  | 0.33   | 0.47  |
| 0.45 | 23.60   | 39.50   | 60.58   | 96.12    | 0.86 | 0.13  | 0.19  | 0.27   | 0.39  |
| 0.46 | 21.23   | 35.65   | 54.23   | 86.09    | 0.87 | 0.10  | 0.16  | 0.22   | 0.31  |
| 0.47 | 19.27   | 32.10   | 48.38   | 77.50    | 0.88 | 0.08  | 0.13  | 0.17   | 0.25  |
| 0.48 | 17.34   | 28.64   | 43.66   | 69.21    | 0.89 | 0.07  | 0.10  | 0.14   | 0.20  |
| 0.49 | 15.46   | 25.80   | 39.22   | 61.89    | 0.90 | 0.05  | 0.08  | 0.11   | 0.15  |
| 0.50 | 13.88   | 23.14   | 34.97   | 55.26    |      |       |       |        |       |

Table S55: Critical values for detector  $\hat{H}^m$  and IM-OLS estimation in a model with intercept. The number of integrated regressors is 4 and the highest power of  $x_{kt}$  is 1.



| m    | 90 %     | 95 %     | 97,5 %   | 99 %     | m    | 90 %  | 95 %  | 97,5 % | 99 %  |
|------|----------|----------|----------|----------|------|-------|-------|--------|-------|
| 0.10 | 14703.80 | 23465.06 | 33938.28 | 51658.12 | 0.51 | 14.84 | 23.18 | 33.41  | 49.91 |
| 0.11 | 10686.42 | 16953.41 | 24893.66 | 37369.91 | 0.52 | 13.15 | 20.55 | 29.61  | 44.39 |
| 0.12 | 7816.74  | 12273.25 | 17940.13 | 27205.38 | 0.53 | 11.57 | 18.10 | 26.05  | 39.16 |
| 0.13 | 5865.26  | 9313.86  | 13583.42 | 20706.81 | 0.54 | 10.25 | 16.03 | 23.10  | 33.55 |
| 0.14 | 4548.23  | 7189.27  | 10462.97 | 15633.38 | 0.55 | 9.01  | 13.99 | 20.13  | 30.14 |
| 0.15 | 3578.46  | 5693.95  | 8300.58  | 12582.64 | 0.56 | 7.99  | 12.40 | 17.88  | 26.54 |
| 0.16 | 2822.69  | 4510.48  | 6571.44  | 9944.68  | 0.57 | 7.06  | 10.87 | 15.70  | 23.08 |
| 0.17 | 2261.03  | 3598.24  | 5251.56  | 7981.09  | 0.58 | 6.18  | 9.63  | 13.62  | 20.18 |
| 0.18 | 1825.69  | 2924.61  | 4285.17  | 6483.75  | 0.59 | 5.44  | 8.42  | 12.11  | 17.82 |
| 0.19 | 1488.53  | 2370.34  | 3479.32  | 5245.62  | 0.60 | 4.81  | 7.46  | 10.55  | 15.43 |
| 0.20 | 1218.47  | 1946.14  | 2835.76  | 4327.22  | 0.61 | 4.23  | 6.54  | 9.30   | 13.64 |
| 0.21 | 1009.04  | 1608.80  | 2379.06  | 3572.23  | 0.62 | 3.73  | 5.73  | 8.12   | 12.13 |
| 0.22 | 832.97   | 1334.32  | 1962.33  | 2960.23  | 0.63 | 3.24  | 5.02  | 7.15   | 10.47 |
| 0.23 | 705.34   | 1124.33  | 1644.59  | 2500.72  | 0.64 | 2.83  | 4.39  | 6.29   | 9.23  |
| 0.24 | 592.99   | 943.23   | 1369.67  | 2055.57  | 0.65 | 2.48  | 3.83  | 5.45   | 7.94  |
| 0.25 | 504.58   | 807.82   | 1177.50  | 1742.10  | 0.66 | 2.16  | 3.33  | 4.75   | 7.00  |
| 0.26 | 426.52   | 675.49   | 982.50   | 1446.93  | 0.67 | 1.88  | 2.88  | 4.11   | 6.01  |
| 0.27 | 363.92   | 574.92   | 836.35   | 1249.77  | 0.68 | 1.63  | 2.53  | 3.57   | 5.16  |
| 0.28 | 311.36   | 493.21   | 719.01   | 1091.55  | 0.69 | 1.43  | 2.18  | 3.09   | 4.50  |
| 0.29 | 266.77   | 423.28   | 623.38   | 941.05   | 0.70 | 1.24  | 1.89  | 2.67   | 3.88  |
| 0.30 | 230.55   | 364.37   | 534.25   | 804.75   | 0.71 | 1.07  | 1.63  | 2.30   | 3.32  |
| 0.31 | 200.34   | 314.73   | 460.68   | 689.74   | 0.72 | 0.92  | 1.40  | 1.97   | 2.88  |
| 0.32 | 173.69   | 272.86   | 401.89   | 604.01   | 0.73 | 0.80  | 1.20  | 1.68   | 2.50  |
| 0.33 | 150.08   | 237.74   | 346.76   | 523.37   | 0.74 | 0.69  | 1.03  | 1.45   | 2.11  |
| 0.34 | 131.46   | 207.40   | 299.82   | 459.40   | 0.75 | 0.59  | 0.88  | 1.23   | 1.77  |
| 0.35 | 113.23   | 179.92   | 260.61   | 396.22   | 0.76 | 0.50  | 0.76  | 1.05   | 1.48  |
| 0.36 | 99.06    | 156.47   | 226.99   | 337.71   | 0.77 | 0.43  | 0.64  | 0.88   | 1.25  |
| 0.37 | 86.72    | 138.19   | 198.81   | 294.55   | 0.78 | 0.36  | 0.53  | 0.74   | 1.05  |
| 0.38 | 75.74    | 120.97   | 175.70   | 259.62   | 0.79 | 0.31  | 0.45  | 0.63   | 0.88  |
| 0.39 | 66.95    | 105.84   | 153.80   | 227.36   | 0.80 | 0.26  | 0.38  | 0.51   | 0.72  |
| 0.40 | 59.16    | 93.26    | 134.45   | 200.93   | 0.81 | 0.21  | 0.31  | 0.43   | 0.61  |
| 0.41 | 52.01    | 82.08    | 119.18   | 177.47   | 0.82 | 0.18  | 0.26  | 0.35   | 0.50  |
| 0.42 | 45.81    | 71.76    | 104.06   | 155.55   | 0.83 | 0.15  | 0.22  | 0.29   | 0.41  |
| 0.43 | 40.35    | 63.23    | 90.90    | 136.43   | 0.84 | 0.12  | 0.18  | 0.24   | 0.33  |
| 0.44 | 35.54    | 55.69    | 80.30    | 119.53   | 0.85 | 0.10  | 0.14  | 0.19   | 0.27  |
| 0.45 | 31.31    | 49.34    | 71.28    | 106.96   | 0.86 | 0.08  | 0.11  | 0.15   | 0.21  |
| 0.46 | 27.70    | 43.16    | 62.45    | 94.51    | 0.87 | 0.06  | 0.09  | 0.12   | 0.17  |
| 0.47 | 24.32    | 38.20    | 55.56    | 83.51    | 0.88 | 0.05  | 0.07  | 0.09   | 0.13  |
| 0.48 | 21.62    | 33.82    | 49.08    | 73.09    | 0.89 | 0.04  | 0.05  | 0.07   | 0.10  |
| 0.49 | 19.10    | 29.96    | 43.24    | 64.57    | 0.90 | 0.03  | 0.04  | 0.05   | 0.07  |
| 0.50 | 16.84    | 26.24    | 37.81    | 56.69    |      |       |       |        |       |

Table S56: Critical values for detector  $\hat{H}^m$  and FM-OLS and D-OLS estimation in a model with intercept and linear trend. The number of integrated regressors is 4 and the highest power of  $x_{kt}$  is 1.

| m    | 90 %     | 95 %     | 97,5 %   | 99 %      | m    | 90 %  | 95 %  | 97,5 % | 99 %   |
|------|----------|----------|----------|-----------|------|-------|-------|--------|--------|
| 0.10 | 28754.10 | 47521.58 | 70924.14 | 111110.00 | 0.51 | 29.55 | 47.75 | 71.35  | 112.87 |
| 0.11 | 20700.71 | 34138.60 | 51180.87 | 80555.29  | 0.52 | 25.98 | 42.32 | 62.57  | 97.96  |
| 0.12 | 15323.72 | 24968.85 | 37302.19 | 58715.17  | 0.53 | 23.03 | 37.14 | 55.79  | 86.04  |
| 0.13 | 11522.64 | 18970.06 | 28225.88 | 44625.66  | 0.54 | 20.26 | 32.82 | 49.12  | 76.07  |
| 0.14 | 8899.08  | 14582.21 | 21622.25 | 33956.22  | 0.55 | 17.96 | 29.00 | 43.10  | 67.14  |
| 0.15 | 6946.47  | 11514.28 | 17006.81 | 26391.43  | 0.56 | 15.88 | 25.59 | 37.91  | 59.88  |
| 0.16 | 5523.59  | 9124.02  | 13738.79 | 21152.46  | 0.57 | 14.05 | 22.61 | 33.47  | 52.26  |
| 0.17 | 4446.01  | 7280.52  | 10910.49 | 17196.88  | 0.58 | 12.29 | 19.90 | 29.26  | 45.61  |
| 0.18 | 3539.77  | 5885.62  | 8784.80  | 13840.41  | 0.59 | 10.78 | 17.35 | 25.66  | 39.19  |
| 0.19 | 2903.52  | 4758.80  | 7224.14  | 11412.88  | 0.60 | 9.54  | 15.32 | 22.54  | 34.14  |
| 0.20 | 2376.78  | 3936.22  | 5833.60  | 9400.79   | 0.61 | 8.37  | 13.42 | 19.47  | 29.65  |
| 0.21 | 1975.42  | 3271.32  | 4947.10  | 7646.37   | 0.62 | 7.38  | 11.73 | 17.17  | 25.94  |
| 0.22 | 1653.39  | 2732.54  | 4144.35  | 6481.23   | 0.63 | 6.51  | 10.31 | 14.95  | 22.84  |
| 0.23 | 1390.75  | 2293.39  | 3477.31  | 5502.01   | 0.64 | 5.73  | 8.97  | 13.08  | 19.86  |
| 0.24 | 1175.34  | 1950.04  | 2925.84  | 4635.29   | 0.65 | 4.98  | 7.87  | 11.43  | 17.44  |
| 0.25 | 1001.39  | 1651.57  | 2464.71  | 3897.16   | 0.66 | 4.34  | 6.82  | 9.97   | 15.18  |
| 0.26 | 840.91   | 1383.92  | 2103.71  | 3233.80   | 0.67 | 3.78  | 5.98  | 8.68   | 13.08  |
| 0.27 | 718.22   | 1186.73  | 1786.40  | 2813.72   | 0.68 | 3.29  | 5.19  | 7.61   | 11.49  |
| 0.28 | 620.19   | 1006.25  | 1529.69  | 2434.04   | 0.69 | 2.87  | 4.54  | 6.59   | 9.88   |
| 0.29 | 533.02   | 874.73   | 1320.67  | 2080.65   | 0.70 | 2.49  | 3.95  | 5.74   | 8.54   |
| 0.30 | 459.55   | 755.80   | 1136.08  | 1799.15   | 0.71 | 2.15  | 3.41  | 4.94   | 7.40   |
| 0.31 | 397.53   | 649.70   | 983.00   | 1553.43   | 0.72 | 1.86  | 2.92  | 4.26   | 6.30   |
| 0.32 | 344.67   | 566.13   | 847.81   | 1312.95   | 0.73 | 1.61  | 2.52  | 3.63   | 5.47   |
| 0.33 | 297.54   | 492.43   | 730.91   | 1135.70   | 0.74 | 1.39  | 2.17  | 3.11   | 4.70   |
| 0.34 | 259.98   | 425.55   | 644.99   | 997.64    | 0.75 | 1.19  | 1.86  | 2.65   | 4.02   |
| 0.35 | 225.15   | 372.01   | 563.40   | 871.66    | 0.76 | 1.01  | 1.59  | 2.27   | 3.36   |
| 0.36 | 196.51   | 323.43   | 485.15   | 760.00    | 0.77 | 0.86  | 1.34  | 1.93   | 2.84   |
| 0.37 | 171.32   | 282.51   | 426.59   | 665.36    | 0.78 | 0.73  | 1.13  | 1.62   | 2.41   |
| 0.38 | 150.31   | 247.36   | 374.76   | 586.05    | 0.79 | 0.62  | 0.95  | 1.35   | 2.02   |
| 0.39 | 132.94   | 217.34   | 329.11   | 511.09    | 0.80 | 0.53  | 0.80  | 1.12   | 1.69   |
| 0.40 | 117.00   | 191.01   | 285.68   | 450.63    | 0.81 | 0.44  | 0.66  | 0.94   | 1.39   |
| 0.41 | 103.35   | 169.60   | 253.40   | 394.50    | 0.82 | 0.36  | 0.55  | 0.78   | 1.13   |
| 0.42 | 91.43    | 148.63   | 223.04   | 348.95    | 0.83 | 0.30  | 0.45  | 0.64   | 0.93   |
| 0.43 | 80.39    | 131.12   | 194.77   | 309.56    | 0.84 | 0.25  | 0.37  | 0.53   | 0.77   |
| 0.44 | 70.62    | 115.09   | 173.49   | 271.51    | 0.85 | 0.20  | 0.31  | 0.43   | 0.61   |
| 0.45 | 62.32    | 101.75   | 151.94   | 238.63    | 0.86 | 0.16  | 0.25  | 0.34   | 0.49   |
| 0.46 | 54.76    | 89.58    | 135.07   | 212.04    | 0.87 | 0.13  | 0.20  | 0.27   | 0.39   |
| 0.47 | 48.52    | 78.99    | 118.89   | 189.30    | 0.88 | 0.11  | 0.16  | 0.21   | 0.31   |
| 0.48 | 43.23    | 69.55    | 105.72   | 165.12    | 0.89 | 0.08  | 0.12  | 0.17   | 0.24   |
| 0.49 | 38.01    | 61.58    | 91.96    | 145.34    | 0.90 | 0.06  | 0.09  | 0.13   | 0.18   |
| 0.50 | 33.61    | 54.51    | 81.32    | 128.70    |      |       |       |        |        |

Table S57: Critical values for detector  $\hat{H}^m$  and IM-OLS estimation in a model with intercept and linear trend. The number of integrated regressors is 4 and the highest power of  $x_{kt}$  is 1.

| m    | 90 %     | 95 %     | 97,5 %   | 99 %      | m    | 90 %  | 95 %  | 97,5 % | 99 %   |
|------|----------|----------|----------|-----------|------|-------|-------|--------|--------|
| 0.10 | 16269.42 | 40780.40 | 88784.09 | 213838.22 | 0.51 | 15.59 | 30.53 | 57.45  | 124.70 |
| 0.11 | 11878.21 | 29791.77 | 62841.51 | 149906.66 | 0.52 | 13.84 | 27.49 | 51.13  | 106.99 |
| 0.12 | 8697.64  | 21951.78 | 46187.61 | 112731.16 | 0.53 | 12.26 | 24.05 | 44.04  | 90.22  |
| 0.13 | 6711.35  | 17024.55 | 35446.72 | 83920.26  | 0.54 | 10.80 | 21.23 | 38.57  | 79.26  |
| 0.14 | 5094.59  | 12714.77 | 27421.81 | 63545.40  | 0.55 | 9.47  | 18.43 | 33.70  | 67.98  |
| 0.15 | 3993.67  | 9924.36  | 21671.72 | 49661.83  | 0.56 | 8.38  | 16.26 | 29.41  | 59.82  |
| 0.16 | 3093.82  | 7659.04  | 16537.69 | 39300.12  | 0.57 | 7.39  | 14.15 | 25.40  | 51.21  |
| 0.17 | 2498.74  | 6004.98  | 12804.72 | 30604.35  | 0.58 | 6.46  | 12.27 | 22.37  | 45.26  |
| 0.18 | 2011.76  | 4857.29  | 10563.44 | 24557.15  | 0.59 | 5.66  | 10.71 | 19.42  | 38.98  |
| 0.19 | 1640.18  | 3978.40  | 8445.27  | 19690.01  | 0.60 | 5.01  | 9.35  | 16.63  | 34.72  |
| 0.20 | 1339.66  | 3217.04  | 6831.32  | 15802.37  | 0.61 | 4.37  | 8.19  | 14.68  | 29.50  |
| 0.21 | 1127.67  | 2700.54  | 5762.26  | 12921.30  | 0.62 | 3.85  | 7.16  | 12.65  | 25.65  |
| 0.22 | 925.09   | 2217.77  | 4755.54  | 10637.68  | 0.63 | 3.38  | 6.22  | 10.90  | 21.48  |
| 0.23 | 780.67   | 1855.30  | 3863.37  | 9060.97   | 0.64 | 2.93  | 5.36  | 9.34   | 18.77  |
| 0.24 | 656.89   | 1536.53  | 3251.67  | 7455.30   | 0.65 | 2.56  | 4.71  | 8.12   | 16.11  |
| 0.25 | 555.64   | 1280.75  | 2726.74  | 6174.39   | 0.66 | 2.22  | 4.08  | 7.05   | 13.63  |
| 0.26 | 470.71   | 1075.79  | 2257.63  | 5218.20   | 0.67 | 1.92  | 3.51  | 5.97   | 11.72  |
| 0.27 | 400.44   | 917.52   | 1888.72  | 4428.57   | 0.68 | 1.69  | 3.02  | 5.15   | 10.23  |
| 0.28 | 343.93   | 784.31   | 1616.98  | 3717.00   | 0.69 | 1.47  | 2.59  | 4.48   | 8.43   |
| 0.29 | 295.56   | 665.34   | 1380.25  | 3181.11   | 0.70 | 1.27  | 2.24  | 3.80   | 7.20   |
| 0.30 | 253.62   | 570.00   | 1179.32  | 2723.64   | 0.71 | 1.10  | 1.92  | 3.22   | 6.03   |
| 0.31 | 218.71   | 494.53   | 1009.55  | 2335.46   | 0.72 | 0.96  | 1.66  | 2.75   | 5.05   |
| 0.32 | 188.21   | 426.09   | 881.49   | 1995.11   | 0.73 | 0.82  | 1.41  | 2.31   | 4.18   |
| 0.33 | 164.60   | 362.97   | 738.42   | 1734.19   | 0.74 | 0.71  | 1.22  | 1.97   | 3.58   |
| 0.34 | 143.47   | 318.09   | 648.58   | 1526.59   | 0.75 | 0.60  | 1.03  | 1.63   | 2.99   |
| 0.35 | 124.82   | 278.60   | 551.64   | 1270.77   | 0.76 | 0.51  | 0.87  | 1.38   | 2.45   |
| 0.36 | 109.86   | 240.17   | 480.31   | 1099.24   | 0.77 | 0.43  | 0.72  | 1.16   | 2.02   |
| 0.37 | 95.26    | 208.36   | 420.25   | 919.62    | 0.78 | 0.36  | 0.60  | 0.95   | 1.68   |
| 0.38 | 83.07    | 178.76   | 364.15   | 807.75    | 0.79 | 0.31  | 0.51  | 0.79   | 1.38   |
| 0.39 | 73.09    | 155.60   | 312.27   | 689.20    | 0.80 | 0.26  | 0.42  | 0.64   | 1.11   |
| 0.40 | 64.56    | 136.71   | 268.46   | 593.78    | 0.81 | 0.22  | 0.35  | 0.52   | 0.90   |
| 0.41 | 56.35    | 118.69   | 233.09   | 515.92    | 0.82 | 0.18  | 0.28  | 0.43   | 0.72   |
| 0.42 | 49.35    | 104.17   | 205.35   | 432.15    | 0.83 | 0.15  | 0.23  | 0.35   | 0.59   |
| 0.43 | 43.21    | 90.37    | 174.59   | 374.62    | 0.84 | 0.12  | 0.19  | 0.28   | 0.45   |
| 0.44 | 37.76    | 78.04    | 155.13   | 328.97    | 0.85 | 0.10  | 0.15  | 0.22   | 0.36   |
| 0.45 | 33.69    | 68.68    | 134.80   | 285.12    | 0.86 | 0.08  | 0.12  | 0.18   | 0.27   |
| 0.46 | 29.60    | 60.63    | 117.17   | 252.50    | 0.87 | 0.06  | 0.09  | 0.14   | 0.21   |
| 0.47 | 26.01    | 52.77    | 100.52   | 220.25    | 0.88 | 0.05  | 0.07  | 0.10   | 0.16   |
| 0.48 | 22.98    | 45.72    | 87.58    | 193.32    | 0.89 | 0.04  | 0.06  | 0.08   | 0.12   |
| 0.49 | 20.40    | 40.98    | 77.12    | 167.74    | 0.90 | 0.03  | 0.04  | 0.06   | 0.09   |
| 0.50 | 17.86    | 35.19    | 66.85    | 144.39    |      |       |       |        |        |

Table S58: Critical values for detector  $\hat{H}^m$  and FM-OLS and D-OLS estimation in a model with intercept. The number of integrated regressors is 4 and the highest power of  $x_{kt}$  is 2.

| m    | 90 %     | 95 %     | 97,5 %    | 99 %      | m    | 90 %  | 95 %  | 97,5 % | 99 %   |
|------|----------|----------|-----------|-----------|------|-------|-------|--------|--------|
| 0.10 | 37319.64 | 95827.68 | 217914.97 | 546987.84 | 0.51 | 35.31 | 74.05 | 147.29 | 326.33 |
| 0.11 | 26895.38 | 69936.50 | 157933.35 | 398703.33 | 0.52 | 31.09 | 65.44 | 127.67 | 291.85 |
| 0.12 | 19851.31 | 52442.63 | 116688.00 | 296544.33 | 0.53 | 27.45 | 57.24 | 111.32 | 244.45 |
| 0.13 | 15183.89 | 39614.81 | 87868.27  | 222330.31 | 0.54 | 23.95 | 50.22 | 96.55  | 208.38 |
| 0.14 | 11579.47 | 30006.74 | 66821.36  | 172528.90 | 0.55 | 21.15 | 44.03 | 83.70  | 182.60 |
| 0.15 | 9163.87  | 23408.91 | 52411.99  | 134242.51 | 0.56 | 18.51 | 38.06 | 73.19  | 159.32 |
| 0.16 | 7285.47  | 18444.16 | 40431.50  | 101726.58 | 0.57 | 16.27 | 33.15 | 63.08  | 138.18 |
| 0.17 | 5709.16  | 14546.35 | 32343.26  | 80728.17  | 0.58 | 14.31 | 28.98 | 54.69  | 121.66 |
| 0.18 | 4526.96  | 11574.00 | 25263.25  | 63689.64  | 0.59 | 12.57 | 25.51 | 47.61  | 105.61 |
| 0.19 | 3702.31  | 9104.14  | 19901.53  | 49546.54  | 0.60 | 11.08 | 22.32 | 41.67  | 89.90  |
| 0.20 | 3071.40  | 7483.53  | 16256.88  | 39254.57  | 0.61 | 9.79  | 19.49 | 36.31  | 77.63  |
| 0.21 | 2546.52  | 6230.17  | 13293.04  | 32760.42  | 0.62 | 8.55  | 16.95 | 31.66  | 66.45  |
| 0.22 | 2085.93  | 4963.25  | 11090.50  | 26443.15  | 0.63 | 7.49  | 14.83 | 27.62  | 57.80  |
| 0.23 | 1767.61  | 4254.83  | 9266.97   | 21838.39  | 0.64 | 6.56  | 12.94 | 23.66  | 49.22  |
| 0.24 | 1511.38  | 3623.90  | 7849.65   | 18341.69  | 0.65 | 5.73  | 11.15 | 20.47  | 41.58  |
| 0.25 | 1282.45  | 3086.59  | 6665.33   | 16033.54  | 0.66 | 4.99  | 9.56  | 17.40  | 35.88  |
| 0.26 | 1082.90  | 2602.85  | 5655.78   | 13603.87  | 0.67 | 4.36  | 8.28  | 14.76  | 30.46  |
| 0.27 | 927.68   | 2181.56  | 4749.86   | 11600.32  | 0.68 | 3.77  | 7.10  | 12.66  | 26.55  |
| 0.28 | 784.18   | 1852.29  | 4024.14   | 9472.51   | 0.69 | 3.28  | 6.17  | 10.95  | 22.47  |
| 0.29 | 675.65   | 1602.02  | 3397.04   | 7956.71   | 0.70 | 2.83  | 5.37  | 9.53   | 19.20  |
| 0.30 | 576.09   | 1355.08  | 2886.27   | 6768.75   | 0.71 | 2.44  | 4.63  | 8.07   | 15.91  |
| 0.31 | 496.88   | 1151.66  | 2480.30   | 5631.84   | 0.72 | 2.10  | 3.95  | 6.85   | 13.82  |
| 0.32 | 425.71   | 992.46   | 2109.57   | 4922.25   | 0.73 | 1.81  | 3.35  | 5.83   | 11.70  |
| 0.33 | 370.41   | 851.01   | 1836.60   | 4252.63   | 0.74 | 1.56  | 2.86  | 4.90   | 9.75   |
| 0.34 | 322.81   | 743.10   | 1583.96   | 3766.75   | 0.75 | 1.33  | 2.41  | 4.12   | 8.20   |
| 0.35 | 283.42   | 649.99   | 1383.52   | 3258.66   | 0.76 | 1.14  | 2.02  | 3.41   | 6.88   |
| 0.36 | 247.78   | 561.92   | 1200.63   | 2794.95   | 0.77 | 0.95  | 1.70  | 2.88   | 5.61   |
| 0.37 | 215.76   | 489.75   | 1041.49   | 2452.83   | 0.78 | 0.80  | 1.42  | 2.38   | 4.45   |
| 0.38 | 187.46   | 426.41   | 891.29    | 2146.10   | 0.79 | 0.68  | 1.18  | 1.95   | 3.60   |
| 0.39 | 163.31   | 364.01   | 762.27    | 1854.64   | 0.80 | 0.57  | 0.98  | 1.59   | 2.95   |
| 0.40 | 144.13   | 324.02   | 671.46    | 1566.97   | 0.81 | 0.47  | 0.80  | 1.32   | 2.41   |
| 0.41 | 126.36   | 284.39   | 575.82    | 1335.39   | 0.82 | 0.39  | 0.67  | 1.07   | 1.95   |
| 0.42 | 110.34   | 245.07   | 488.57    | 1132.88   | 0.83 | 0.32  | 0.55  | 0.87   | 1.53   |
| 0.43 | 95.53    | 213.46   | 427.38    | 990.83    | 0.84 | 0.26  | 0.44  | 0.70   | 1.21   |
| 0.44 | 83.51    | 185.08   | 372.70    | 852.49    | 0.85 | 0.22  | 0.36  | 0.55   | 0.94   |
| 0.45 | 74.00    | 160.54   | 325.29    | 746.44    | 0.86 | 0.18  | 0.29  | 0.44   | 0.73   |
| 0.46 | 65.97    | 142.39   | 289.80    | 634.83    | 0.87 | 0.14  | 0.23  | 0.35   | 0.57   |
| 0.47 | 58.02    | 125.50   | 252.81    | 556.82    | 0.88 | 0.11  | 0.18  | 0.27   | 0.44   |
| 0.48 | 51.24    | 110.41   | 220.39    | 497.12    | 0.89 | 0.09  | 0.14  | 0.20   | 0.33   |
| 0.49 | 45.26    | 97.18    | 193.23    | 427.64    | 0.90 | 0.07  | 0.10  | 0.15   | 0.25   |
| 0.50 | 40.17    | 85.31    | 168.11    | 374.10    |      |       |       |        |        |

Table S59: Critical values for detector  $\hat{H}^m$  and IM-OLS estimation in a model with intercept. The number of integrated regressors is 4 and the highest power of  $x_{kt}$  is 2.

| m    | 90 %     | 95 %     | 97,5 %    | 99 %      | m    | 90 %  | 95 %  | 97,5 % | 99 %   |
|------|----------|----------|-----------|-----------|------|-------|-------|--------|--------|
| 0.10 | 40022.28 | 75382.66 | 136019.37 | 289591.37 | 0.51 | 26.75 | 45.83 | 76.92  | 148.82 |
| 0.11 | 28739.36 | 53696.95 | 97985.11  | 197649.14 | 0.52 | 23.42 | 40.83 | 67.23  | 127.57 |
| 0.12 | 20686.16 | 39048.78 | 70558.52  | 148410.43 | 0.53 | 20.53 | 35.60 | 58.61  | 108.22 |
| 0.13 | 15497.88 | 29144.47 | 52685.89  | 108059.05 | 0.54 | 18.12 | 31.26 | 51.34  | 93.52  |
| 0.14 | 11701.78 | 21737.07 | 38939.13  | 80618.02  | 0.55 | 15.81 | 27.34 | 44.38  | 80.59  |
| 0.15 | 9077.21  | 17090.31 | 30421.55  | 63109.83  | 0.56 | 13.91 | 23.85 | 38.52  | 68.88  |
| 0.16 | 7051.54  | 13173.73 | 23574.19  | 49313.19  | 0.57 | 12.25 | 20.70 | 33.29  | 60.07  |
| 0.17 | 5547.50  | 10247.41 | 18137.92  | 37487.75  | 0.58 | 10.57 | 18.08 | 29.29  | 53.50  |
| 0.18 | 4461.13  | 8279.95  | 14845.39  | 30971.54  | 0.59 | 9.24  | 15.78 | 25.25  | 45.75  |
| 0.19 | 3579.22  | 6603.90  | 11728.16  | 24048.34  | 0.60 | 8.04  | 13.78 | 22.00  | 40.63  |
| 0.20 | 2921.09  | 5345.06  | 9579.00   | 19639.49  | 0.61 | 6.98  | 12.06 | 19.21  | 35.16  |
| 0.21 | 2406.33  | 4422.19  | 7874.20   | 15885.27  | 0.62 | 6.15  | 10.38 | 16.65  | 30.48  |
| 0.22 | 1974.85  | 3623.80  | 6496.49   | 12995.94  | 0.63 | 5.35  | 9.01  | 14.31  | 25.26  |
| 0.23 | 1652.07  | 3013.29  | 5254.11   | 10833.56  | 0.64 | 4.61  | 7.76  | 12.27  | 21.79  |
| 0.24 | 1358.96  | 2504.09  | 4342.55   | 8913.08   | 0.65 | 3.98  | 6.67  | 10.59  | 18.69  |
| 0.25 | 1141.92  | 2068.08  | 3667.18   | 7265.77   | 0.66 | 3.45  | 5.80  | 9.19   | 16.22  |
| 0.26 | 949.88   | 1719.57  | 3004.23   | 6331.37   | 0.67 | 2.97  | 4.99  | 7.88   | 13.66  |
| 0.27 | 803.97   | 1452.46  | 2566.66   | 5247.75   | 0.68 | 2.59  | 4.26  | 6.69   | 11.90  |
| 0.28 | 685.39   | 1244.07  | 2155.49   | 4457.76   | 0.69 | 2.23  | 3.66  | 5.78   | 10.02  |
| 0.29 | 580.73   | 1050.09  | 1835.48   | 3734.61   | 0.70 | 1.90  | 3.15  | 4.91   | 8.44   |
| 0.30 | 498.41   | 893.83   | 1569.28   | 3245.89   | 0.71 | 1.64  | 2.68  | 4.18   | 7.15   |
| 0.31 | 425.17   | 767.85   | 1344.32   | 2752.78   | 0.72 | 1.40  | 2.30  | 3.56   | 6.05   |
| 0.32 | 366.97   | 665.56   | 1171.08   | 2311.08   | 0.73 | 1.20  | 1.96  | 3.01   | 4.99   |
| 0.33 | 315.05   | 571.51   | 994.04    | 2000.56   | 0.74 | 1.02  | 1.65  | 2.52   | 4.18   |
| 0.34 | 272.81   | 490.74   | 856.08    | 1772.18   | 0.75 | 0.87  | 1.38  | 2.11   | 3.50   |
| 0.35 | 234.56   | 427.15   | 729.73    | 1482.77   | 0.76 | 0.73  | 1.17  | 1.75   | 2.87   |
| 0.36 | 204.26   | 366.38   | 634.33    | 1264.27   | 0.77 | 0.61  | 0.97  | 1.45   | 2.38   |
| 0.37 | 176.87   | 318.22   | 543.92    | 1071.76   | 0.78 | 0.51  | 0.80  | 1.20   | 1.95   |
| 0.38 | 153.91   | 274.54   | 471.98    | 948.47    | 0.79 | 0.43  | 0.67  | 1.01   | 1.63   |
| 0.39 | 135.43   | 241.01   | 405.10    | 796.37    | 0.80 | 0.35  | 0.55  | 0.81   | 1.31   |
| 0.40 | 117.64   | 207.57   | 352.73    | 686.13    | 0.81 | 0.29  | 0.45  | 0.67   | 1.05   |
| 0.41 | 102.07   | 179.77   | 302.75    | 590.91    | 0.82 | 0.24  | 0.37  | 0.55   | 0.87   |
| 0.42 | 89.58    | 157.73   | 262.77    | 511.27    | 0.83 | 0.20  | 0.30  | 0.44   | 0.69   |
| 0.43 | 77.93    | 136.67   | 227.05    | 444.43    | 0.84 | 0.16  | 0.24  | 0.35   | 0.55   |
| 0.44 | 67.09    | 118.95   | 200.70    | 378.86    | 0.85 | 0.13  | 0.19  | 0.28   | 0.42   |
| 0.45 | 59.58    | 104.58   | 175.20    | 335.27    | 0.86 | 0.10  | 0.15  | 0.21   | 0.32   |
| 0.46 | 52.00    | 91.44    | 154.02    | 294.77    | 0.87 | 0.08  | 0.12  | 0.17   | 0.25   |
| 0.47 | 45.76    | 79.35    | 133.20    | 258.20    | 0.88 | 0.06  | 0.09  | 0.13   | 0.19   |
| 0.48 | 39.71    | 69.84    | 116.14    | 223.25    | 0.89 | 0.05  | 0.07  | 0.10   | 0.14   |
| 0.49 | 35.18    | 61.05    | 101.29    | 198.70    | 0.90 | 0.03  | 0.05  | 0.07   | 0.10   |
| 0.50 | 30.64    | 52.38    | 89.24     | 171.91    |      |       |       |        |        |

Table S60: Critical values for detector  $\hat{H}^m$  and FM-OLS and D-OLS estimation in a model with intercept and linear trend. The number of integrated regressors is 4 and the highest power of  $x_{kt}$  is 2.

| m    | 90 %     | 95 %      | 97,5 %    | 99 %      | m    | 90 %  | 95 %   | 97,5 % | 99 %   |
|------|----------|-----------|-----------|-----------|------|-------|--------|--------|--------|
| 0.10 | 86137.07 | 171924.70 | 324280.27 | 741707.65 | 0.51 | 57.88 | 105.83 | 184.92 | 367.60 |
| 0.11 | 61700.28 | 121402.46 | 229209.06 | 523390.60 | 0.52 | 50.50 | 92.71  | 159.78 | 315.61 |
| 0.12 | 44663.68 | 88651.31  | 167793.15 | 370919.33 | 0.53 | 44.18 | 80.97  | 138.00 | 274.53 |
| 0.13 | 32889.07 | 65432.46  | 123770.54 | 273534.79 | 0.54 | 38.93 | 70.25  | 119.68 | 237.84 |
| 0.14 | 25117.96 | 49430.80  | 92971.04  | 207619.58 | 0.55 | 33.94 | 60.82  | 104.70 | 207.98 |
| 0.15 | 19140.30 | 38264.70  | 72702.53  | 160394.48 | 0.56 | 29.63 | 53.07  | 90.86  | 181.13 |
| 0.16 | 15060.01 | 29584.12  | 55479.69  | 123534.15 | 0.57 | 25.79 | 46.75  | 79.23  | 154.42 |
| 0.17 | 11934.14 | 23094.35  | 43005.00  | 95975.20  | 0.58 | 22.42 | 40.57  | 68.65  | 136.10 |
| 0.18 | 9420.56  | 18482.79  | 33785.64  | 75384.71  | 0.59 | 19.62 | 35.15  | 59.31  | 115.81 |
| 0.19 | 7634.83  | 14636.75  | 26910.46  | 59090.71  | 0.60 | 17.18 | 30.47  | 51.83  | 98.71  |
| 0.20 | 6146.83  | 11837.46  | 21679.97  | 46392.24  | 0.61 | 14.93 | 26.47  | 44.77  | 86.30  |
| 0.21 | 5025.11  | 9728.15   | 17544.78  | 37498.84  | 0.62 | 13.04 | 23.03  | 38.64  | 74.54  |
| 0.22 | 4161.56  | 8023.45   | 14457.76  | 30419.75  | 0.63 | 11.37 | 20.03  | 33.49  | 64.53  |
| 0.23 | 3468.63  | 6632.71   | 12056.13  | 24803.74  | 0.64 | 9.84  | 17.32  | 28.85  | 54.83  |
| 0.24 | 2912.83  | 5558.42   | 10177.48  | 21022.26  | 0.65 | 8.55  | 15.15  | 24.61  | 46.47  |
| 0.25 | 2451.51  | 4630.79   | 8538.11   | 17773.15  | 0.66 | 7.40  | 12.90  | 21.09  | 38.63  |
| 0.26 | 2053.22  | 3949.93   | 7198.31   | 15177.53  | 0.67 | 6.40  | 11.12  | 17.96  | 33.32  |
| 0.27 | 1734.37  | 3256.08   | 5994.40   | 13172.06  | 0.68 | 5.54  | 9.53   | 15.38  | 29.03  |
| 0.28 | 1471.10  | 2760.33   | 5107.10   | 11080.92  | 0.69 | 4.79  | 8.21   | 13.12  | 24.84  |
| 0.29 | 1245.87  | 2370.50   | 4308.25   | 9214.82   | 0.70 | 4.12  | 7.11   | 11.30  | 21.02  |
| 0.30 | 1069.16  | 1999.08   | 3696.35   | 7853.75   | 0.71 | 3.55  | 6.09   | 9.72   | 17.63  |
| 0.31 | 913.39   | 1735.33   | 3160.87   | 6682.47   | 0.72 | 3.02  | 5.18   | 8.32   | 14.92  |
| 0.32 | 787.24   | 1475.84   | 2716.46   | 5778.18   | 0.73 | 2.57  | 4.42   | 7.09   | 12.56  |
| 0.33 | 676.36   | 1285.08   | 2304.17   | 4872.79   | 0.74 | 2.18  | 3.75   | 5.92   | 10.46  |
| 0.34 | 585.00   | 1111.90   | 2025.87   | 4187.50   | 0.75 | 1.86  | 3.13   | 4.95   | 8.90   |
| 0.35 | 508.83   | 964.91    | 1760.42   | 3634.86   | 0.76 | 1.57  | 2.63   | 4.20   | 7.42   |
| 0.36 | 440.30   | 834.88    | 1525.97   | 3105.11   | 0.77 | 1.32  | 2.22   | 3.47   | 6.05   |
| 0.37 | 382.00   | 728.88    | 1295.81   | 2729.75   | 0.78 | 1.10  | 1.84   | 2.85   | 4.98   |
| 0.38 | 331.27   | 627.85    | 1121.66   | 2362.36   | 0.79 | 0.91  | 1.52   | 2.35   | 4.08   |
| 0.39 | 285.78   | 537.04    | 960.95    | 2047.72   | 0.80 | 0.76  | 1.25   | 1.96   | 3.36   |
| 0.40 | 247.46   | 465.26    | 836.85    | 1714.27   | 0.81 | 0.63  | 1.04   | 1.61   | 2.75   |
| 0.41 | 218.25   | 402.99    | 723.20    | 1481.88   | 0.82 | 0.52  | 0.84   | 1.31   | 2.18   |
| 0.42 | 189.07   | 352.02    | 626.61    | 1263.08   | 0.83 | 0.42  | 0.68   | 1.05   | 1.72   |
| 0.43 | 166.44   | 308.68    | 546.72    | 1106.54   | 0.84 | 0.34  | 0.55   | 0.83   | 1.37   |
| 0.44 | 144.84   | 266.54    | 472.22    | 975.75    | 0.85 | 0.28  | 0.44   | 0.65   | 1.05   |
| 0.45 | 126.75   | 232.22    | 409.76    | 877.50    | 0.86 | 0.22  | 0.35   | 0.51   | 0.82   |
| 0.46 | 112.25   | 206.21    | 363.89    | 760.56    | 0.87 | 0.17  | 0.27   | 0.41   | 0.63   |
| 0.47 | 98.08    | 181.45    | 314.42    | 651.74    | 0.88 | 0.14  | 0.21   | 0.31   | 0.48   |
| 0.48 | 86.41    | 159.43    | 274.60    | 563.47    | 0.89 | 0.10  | 0.16   | 0.23   | 0.37   |
| 0.49 | 75.69    | 138.06    | 236.77    | 488.89    | 0.90 | 0.08  | 0.12   | 0.17   | 0.27   |
| 0.50 | 66.16    | 120.13    | 209.54    | 425.37    |      |       |        |        |        |

Table S61: Critical values for detector  $\hat{H}^m$  and IM-OLS estimation in a model with intercept and linear trend. The number of integrated regressors is 4 and the highest power of  $x_{kt}$  is 2.

| m    | 90 %       | 95 %       | 97,5 %      | 99 %        | m    | 90 %   | 95 %   | 97,5 %  | 99 %    |
|------|------------|------------|-------------|-------------|------|--------|--------|---------|---------|
| 0.10 | 1463669.64 | 5281778.03 | 16162969.30 | 53476536.56 | 0.51 | 112.74 | 384.05 | 1078.81 | 3156.84 |
| 0.11 | 952379.99  | 3507644.12 | 10326261.65 | 33551768.51 | 0.52 | 94.65  | 320.81 | 900.30  | 2580.14 |
| 0.12 | 648458.22  | 2352012.68 | 6906683.48  | 22628597.49 | 0.53 | 79.68  | 272.47 | 756.34  | 2279.96 |
| 0.13 | 443783.23  | 1605414.02 | 4717135.51  | 15642785.08 | 0.54 | 67.34  | 227.20 | 633.61  | 1850.99 |
| 0.14 | 308451.21  | 1127565.97 | 3350703.17  | 11199392.83 | 0.55 | 55.56  | 187.95 | 515.76  | 1562.04 |
| 0.15 | 219792.32  | 800825.05  | 2413497.40  | 8116815.37  | 0.56 | 46.85  | 156.04 | 432.73  | 1293.09 |
| 0.16 | 159993.98  | 567319.71  | 1711998.58  | 5786191.11  | 0.57 | 39.34  | 129.06 | 351.45  | 1051.72 |
| 0.17 | 118019.93  | 421793.90  | 1245998.18  | 4124846.33  | 0.58 | 32.65  | 106.30 | 288.81  | 873.01  |
| 0.18 | 86117.80   | 306013.72  | 907462.27   | 2999234.12  | 0.59 | 27.15  | 89.89  | 235.37  | 732.00  |
| 0.19 | 67562.67   | 237733.83  | 690944.40   | 2293976.69  | 0.60 | 22.94  | 73.62  | 193.60  | 615.81  |
| 0.20 | 51875.95   | 184949.11  | 538469.09   | 1762092.94  | 0.61 | 19.44  | 62.27  | 161.06  | 504.64  |
| 0.21 | 40268.49   | 145295.98  | 412584.93   | 1325522.67  | 0.62 | 16.00  | 51.11  | 133.88  | 422.43  |
| 0.22 | 32148.69   | 113325.78  | 330453.80   | 1054711.44  | 0.63 | 13.35  | 42.67  | 110.49  | 334.95  |
| 0.23 | 25020.82   | 90669.39   | 263030.05   | 840627.99   | 0.64 | 11.26  | 35.71  | 90.96   | 273.72  |
| 0.24 | 20113.60   | 72628.02   | 207479.12   | 657608.42   | 0.65 | 9.47   | 29.78  | 74.35   | 217.26  |
| 0.25 | 15876.00   | 56551.85   | 164426.67   | 498672.45   | 0.66 | 7.83   | 23.94  | 63.89   | 188.88  |
| 0.26 | 12583.21   | 45157.40   | 127967.38   | 400478.76   | 0.67 | 6.45   | 19.81  | 51.68   | 145.95  |
| 0.27 | 10017.22   | 36600.51   | 105189.81   | 315722.60   | 0.68 | 5.44   | 16.29  | 42.44   | 123.36  |
| 0.28 | 8072.01    | 28633.98   | 84283.95    | 253683.62   | 0.69 | 4.55   | 13.13  | 34.62   | 98.54   |
| 0.29 | 6510.46    | 23571.78   | 67114.54    | 211165.37   | 0.70 | 3.68   | 10.70  | 27.42   | 80.87   |
| 0.30 | 5175.72    | 18996.27   | 53708.11    | 166733.77   | 0.71 | 3.05   | 8.79   | 22.45   | 65.67   |
| 0.31 | 4249.85    | 15669.93   | 44338.73    | 139156.35   | 0.72 | 2.48   | 7.11   | 18.22   | 53.42   |
| 0.32 | 3495.64    | 12786.66   | 36205.06    | 112151.78   | 0.73 | 2.06   | 5.79   | 14.50   | 41.67   |
| 0.33 | 2891.87    | 10525.07   | 29398.37    | 92815.92    | 0.74 | 1.69   | 4.65   | 11.83   | 32.49   |
| 0.34 | 2349.85    | 8429.33    | 24233.84    | 76328.61    | 0.75 | 1.38   | 3.75   | 9.32    | 26.34   |
| 0.35 | 1941.91    | 6997.08    | 20091.43    | 64188.49    | 0.76 | 1.14   | 3.05   | 7.42    | 20.24   |
| 0.36 | 1582.27    | 5752.77    | 16782.29    | 51968.42    | 0.77 | 0.92   | 2.39   | 5.81    | 16.23   |
| 0.37 | 1336.60    | 4718.22    | 14052.89    | 43208.96    | 0.78 | 0.75   | 1.87   | 4.44    | 12.46   |
| 0.38 | 1122.66    | 3901.56    | 11466.58    | 36038.76    | 0.79 | 0.61   | 1.48   | 3.42    | 9.22    |
| 0.39 | 943.54     | 3282.90    | 9367.14     | 29368.37    | 0.80 | 0.49   | 1.16   | 2.67    | 7.33    |
| 0.40 | 764.97     | 2755.34    | 7811.53     | 24291.92    | 0.81 | 0.39   | 0.90   | 2.08    | 5.46    |
| 0.41 | 645.33     | 2291.72    | 6551.31     | 20512.84    | 0.82 | 0.32   | 0.71   | 1.60    | 4.10    |
| 0.42 | 536.64     | 1865.43    | 5376.49     | 16456.31    | 0.83 | 0.25   | 0.54   | 1.20    | 3.13    |
| 0.43 | 443.62     | 1579.81    | 4506.83     | 13986.78    | 0.84 | 0.20   | 0.41   | 0.89    | 2.23    |
| 0.44 | 365.52     | 1302.97    | 3752.28     | 11511.12    | 0.85 | 0.15   | 0.31   | 0.66    | 1.60    |
| 0.45 | 311.92     | 1093.72    | 3122.65     | 9745.46     | 0.86 | 0.12   | 0.24   | 0.48    | 1.14    |
| 0.46 | 264.41     | 921.49     | 2558.44     | 7850.36     | 0.87 | 0.09   | 0.17   | 0.35    | 0.85    |
| 0.47 | 222.44     | 776.04     | 2153.89     | 6783.24     | 0.88 | 0.07   | 0.13   | 0.24    | 0.57    |
| 0.48 | 189.37     | 649.12     | 1825.74     | 5644.49     | 0.89 | 0.05   | 0.09   | 0.17    | 0.38    |
| 0.49 | 159.83     | 545.50     | 1515.68     | 4777.50     | 0.90 | 0.04   | 0.07   | 0.12    | 0.25    |
| 0.50 | 132.80     | 452.11     | 1262.00     | 3857.35     |      |        |        |         |         |

Table S62: Critical values for detector  $\hat{H}^m$  and FM-OLS and D-OLS estimation in a model with intercept. The number of integrated regressors is 4 and the highest power of  $x_{kt}$  is 3.

| m    | 90 %       | 95 %        | 97,5 %      | 99 %         | m    | 90 %   | 95 %    | 97,5 %  | 99 %     |
|------|------------|-------------|-------------|--------------|------|--------|---------|---------|----------|
| 0.10 | 4565639.44 | 18091925.62 | 55599967.89 | 200498566.85 | 0.51 | 340.38 | 1237.92 | 3546.25 | 11679.19 |
| 0.11 | 2956733.73 | 11288026.94 | 34875735.96 | 127117837.79 | 0.52 | 289.80 | 1032.87 | 2962.60 | 9868.07  |
| 0.12 | 1995323.00 | 7667686.12  | 23351415.53 | 84892801.34  | 0.53 | 238.86 | 856.28  | 2438.61 | 8206.16  |
| 0.13 | 1349031.41 | 5249482.44  | 16649148.01 | 65419822.40  | 0.54 | 202.02 | 715.31  | 2034.66 | 6829.69  |
| 0.14 | 963323.74  | 3818056.47  | 11893605.28 | 42134968.74  | 0.55 | 171.51 | 592.68  | 1689.39 | 5431.66  |
| 0.15 | 682242.37  | 2677550.69  | 8497370.39  | 29527447.62  | 0.56 | 143.12 | 501.20  | 1433.74 | 4731.58  |
| 0.16 | 500277.67  | 1920866.14  | 6313311.48  | 21067495.29  | 0.57 | 119.01 | 428.83  | 1213.80 | 3913.02  |
| 0.17 | 372601.10  | 1458499.51  | 4685235.98  | 15759900.28  | 0.58 | 97.83  | 354.34  | 1001.30 | 3243.66  |
| 0.18 | 276683.83  | 1091606.32  | 3366090.00  | 11702366.62  | 0.59 | 82.16  | 296.22  | 860.42  | 2720.37  |
| 0.19 | 207239.27  | 797612.36   | 2571406.15  | 8798042.14   | 0.60 | 67.41  | 250.74  | 704.16  | 2325.76  |
| 0.20 | 159662.89  | 624306.20   | 1945959.20  | 6845466.47   | 0.61 | 57.10  | 206.26  | 596.29  | 1872.74  |
| 0.21 | 122831.67  | 470903.73   | 1501820.80  | 5503071.67   | 0.62 | 47.59  | 169.35  | 481.19  | 1513.03  |
| 0.22 | 96395.02   | 365135.68   | 1123045.28  | 4113651.59   | 0.63 | 40.08  | 137.68  | 396.94  | 1269.05  |
| 0.23 | 74966.67   | 284442.30   | 870140.72   | 3121255.99   | 0.64 | 33.56  | 115.11  | 328.77  | 1046.53  |
| 0.24 | 58775.33   | 226677.36   | 686471.73   | 2537499.32   | 0.65 | 27.95  | 94.44   | 269.81  | 873.40   |
| 0.25 | 45868.73   | 174315.83   | 542018.43   | 1958067.45   | 0.66 | 23.30  | 78.41   | 220.35  | 712.01   |
| 0.26 | 36277.62   | 140225.65   | 418302.95   | 1519845.92   | 0.67 | 19.33  | 64.86   | 177.39  | 567.97   |
| 0.27 | 29818.89   | 113941.34   | 337101.47   | 1239889.19   | 0.68 | 15.81  | 53.13   | 144.05  | 466.92   |
| 0.28 | 24200.66   | 93636.08    | 282427.29   | 1012392.81   | 0.69 | 13.09  | 43.86   | 119.87  | 363.28   |
| 0.29 | 19906.05   | 76246.12    | 227398.31   | 814199.03    | 0.70 | 10.89  | 35.43   | 96.66   | 292.50   |
| 0.30 | 15982.94   | 61895.17    | 183949.58   | 633363.73    | 0.71 | 8.99   | 28.42   | 78.07   | 229.42   |
| 0.31 | 12994.67   | 49511.39    | 150175.92   | 514201.66    | 0.72 | 7.33   | 22.99   | 62.84   | 188.50   |
| 0.32 | 10845.18   | 40440.73    | 123906.87   | 418386.14    | 0.73 | 5.96   | 18.91   | 51.20   | 152.38   |
| 0.33 | 8883.62    | 33317.89    | 104182.52   | 342547.96    | 0.74 | 4.80   | 15.06   | 39.81   | 126.81   |
| 0.34 | 7271.00    | 27755.04    | 85634.60    | 287002.63    | 0.75 | 3.91   | 12.21   | 32.26   | 97.07    |
| 0.35 | 5931.92    | 22658.95    | 69244.40    | 235531.90    | 0.76 | 3.13   | 9.51    | 25.47   | 77.51    |
| 0.36 | 4926.63    | 18917.08    | 57675.35    | 193481.78    | 0.77 | 2.55   | 7.49    | 19.85   | 58.01    |
| 0.37 | 4086.75    | 15755.59    | 46613.66    | 160139.07    | 0.78 | 2.04   | 5.93    | 15.48   | 45.07    |
| 0.38 | 3388.69    | 12821.86    | 38342.35    | 134705.87    | 0.79 | 1.64   | 4.67    | 12.02   | 35.56    |
| 0.39 | 2841.55    | 10608.54    | 31510.37    | 112909.59    | 0.80 | 1.31   | 3.66    | 9.33    | 26.82    |
| 0.40 | 2365.52    | 8794.99     | 26985.66    | 90259.51     | 0.81 | 1.04   | 2.83    | 7.16    | 20.40    |
| 0.41 | 1936.80    | 7264.44     | 22132.94    | 76793.43     | 0.82 | 0.83   | 2.19    | 5.49    | 15.61    |
| 0.42 | 1579.82    | 5989.53     | 18675.69    | 63041.19     | 0.83 | 0.66   | 1.65    | 4.12    | 11.79    |
| 0.43 | 1314.42    | 4978.07     | 15220.78    | 51669.38     | 0.84 | 0.51   | 1.24    | 3.06    | 8.74     |
| 0.44 | 1108.25    | 4183.38     | 12454.23    | 42604.14     | 0.85 | 0.40   | 0.94    | 2.33    | 6.30     |
| 0.45 | 923.69     | 3476.78     | 10604.69    | 35825.53     | 0.86 | 0.31   | 0.71    | 1.66    | 4.35     |
| 0.46 | 783.52     | 2924.37     | 8833.79     | 29619.20     | 0.87 | 0.24   | 0.53    | 1.18    | 3.09     |
| 0.47 | 662.32     | 2430.28     | 7251.50     | 24366.55     | 0.88 | 0.18   | 0.39    | 0.83    | 2.18     |
| 0.48 | 569.82     | 2032.45     | 5901.74     | 20170.92     | 0.89 | 0.13   | 0.28    | 0.58    | 1.49     |
| 0.49 | 472.89     | 1733.71     | 4962.07     | 16959.96     | 0.90 | 0.10   | 0.19    | 0.40    | 0.98     |
| 0.50 | 404.63     | 1444.90     | 4207.61     | 14205.70     |      |        |         |         |          |

Table S63: Critical values for detector  $\hat{H}^m$  and IM-OLS estimation in a model with intercept. The number of integrated regressors is 4 and the highest power of  $x_{kt}$  is 3.



| m    | 90 %       | 95 %       | 97,5 %      | 99 %        | m    | 90 %   | 95 %   | 97,5 %  | 99 %    |
|------|------------|------------|-------------|-------------|------|--------|--------|---------|---------|
| 0.10 | 2005522.21 | 6885780.05 | 19347271.75 | 61423950.04 | 0.51 | 127.49 | 411.31 | 1135.69 | 3369.07 |
| 0.11 | 1302900.36 | 4452452.92 | 12492364.57 | 39505183.44 | 0.52 | 108.13 | 345.37 | 942.20  | 2655.41 |
| 0.12 | 860936.49  | 2906701.52 | 8365255.29  | 25750252.15 | 0.53 | 90.53  | 289.50 | 794.77  | 2307.04 |
| 0.13 | 585699.84  | 1985417.66 | 5527191.04  | 17880754.95 | 0.54 | 77.36  | 245.33 | 658.40  | 1912.51 |
| 0.14 | 398142.27  | 1372215.03 | 3907425.34  | 12091586.40 | 0.55 | 63.07  | 201.67 | 538.35  | 1643.75 |
| 0.15 | 280154.26  | 963829.19  | 2745135.30  | 9060619.01  | 0.56 | 53.58  | 168.84 | 456.64  | 1334.90 |
| 0.16 | 203512.27  | 690900.42  | 1982288.00  | 6313529.05  | 0.57 | 45.03  | 138.46 | 370.69  | 1096.71 |
| 0.17 | 148378.03  | 496773.84  | 1416945.55  | 4689712.67  | 0.58 | 37.53  | 114.03 | 307.35  | 891.33  |
| 0.18 | 106954.75  | 368267.24  | 1040775.28  | 3215305.68  | 0.59 | 31.93  | 95.20  | 251.69  | 751.35  |
| 0.19 | 82320.01   | 280475.62  | 790480.48   | 2529592.41  | 0.60 | 26.68  | 78.74  | 212.90  | 630.75  |
| 0.20 | 63724.37   | 214016.32  | 586940.55   | 1896420.54  | 0.61 | 22.44  | 67.09  | 171.82  | 518.06  |
| 0.21 | 48753.36   | 165780.61  | 464828.31   | 1451749.82  | 0.62 | 18.78  | 54.99  | 140.89  | 437.56  |
| 0.22 | 38031.38   | 128465.08  | 364265.15   | 1140597.50  | 0.63 | 15.78  | 45.94  | 115.66  | 351.78  |
| 0.23 | 29522.42   | 100945.07  | 284402.91   | 903503.93   | 0.64 | 13.29  | 37.99  | 95.82   | 289.81  |
| 0.24 | 23787.92   | 81172.56   | 226304.55   | 700282.47   | 0.65 | 11.17  | 31.47  | 78.40   | 228.98  |
| 0.25 | 18704.00   | 63974.88   | 178767.64   | 532817.95   | 0.66 | 9.41   | 25.80  | 66.76   | 193.90  |
| 0.26 | 14850.28   | 50486.70   | 137463.03   | 424397.33   | 0.67 | 7.74   | 21.36  | 54.47   | 155.15  |
| 0.27 | 11752.20   | 40320.32   | 110497.42   | 338215.12   | 0.68 | 6.53   | 17.58  | 44.77   | 127.87  |
| 0.28 | 9328.81    | 32272.69   | 88893.90    | 273190.21   | 0.69 | 5.48   | 14.32  | 35.53   | 103.25  |
| 0.29 | 7499.96    | 25911.31   | 72617.18    | 223671.01   | 0.70 | 4.52   | 11.80  | 28.90   | 85.01   |
| 0.30 | 5984.14    | 20670.79   | 57583.18    | 176354.43   | 0.71 | 3.74   | 9.51   | 23.87   | 70.42   |
| 0.31 | 4883.50    | 17036.31   | 47724.44    | 144531.29   | 0.72 | 3.07   | 7.78   | 19.35   | 55.11   |
| 0.32 | 3972.78    | 13798.53   | 38946.30    | 118301.60   | 0.73 | 2.55   | 6.37   | 15.58   | 43.84   |
| 0.33 | 3254.71    | 11396.77   | 31636.45    | 96322.22    | 0.74 | 2.10   | 5.20   | 12.57   | 33.70   |
| 0.34 | 2666.85    | 9236.62    | 25845.28    | 79071.31    | 0.75 | 1.73   | 4.11   | 9.86    | 26.80   |
| 0.35 | 2216.99    | 7661.17    | 21355.71    | 64619.75    | 0.76 | 1.43   | 3.34   | 7.87    | 21.24   |
| 0.36 | 1803.40    | 6334.42    | 17439.71    | 53391.72    | 0.77 | 1.16   | 2.63   | 6.19    | 16.85   |
| 0.37 | 1501.31    | 5168.20    | 14631.50    | 45587.20    | 0.78 | 0.94   | 2.06   | 4.74    | 13.04   |
| 0.38 | 1263.74    | 4231.53    | 12115.63    | 36727.92    | 0.79 | 0.76   | 1.64   | 3.60    | 9.81    |
| 0.39 | 1050.43    | 3530.17    | 10037.21    | 30203.64    | 0.80 | 0.61   | 1.30   | 2.83    | 7.82    |
| 0.40 | 860.44     | 2962.00    | 8337.33     | 25212.95    | 0.81 | 0.49   | 1.01   | 2.20    | 5.72    |
| 0.41 | 725.06     | 2489.18    | 6873.02     | 21209.45    | 0.82 | 0.40   | 0.79   | 1.71    | 4.30    |
| 0.42 | 597.35     | 2039.64    | 5628.94     | 17009.24    | 0.83 | 0.31   | 0.61   | 1.29    | 3.27    |
| 0.43 | 497.35     | 1691.56    | 4694.32     | 14563.37    | 0.84 | 0.24   | 0.47   | 0.95    | 2.33    |
| 0.44 | 408.86     | 1400.58    | 3928.40     | 12047.99    | 0.85 | 0.19   | 0.36   | 0.71    | 1.68    |
| 0.45 | 350.61     | 1169.61    | 3295.90     | 10196.33    | 0.86 | 0.15   | 0.27   | 0.51    | 1.19    |
| 0.46 | 294.50     | 992.80     | 2706.38     | 8331.40     | 0.87 | 0.11   | 0.20   | 0.38    | 0.88    |
| 0.47 | 247.80     | 819.96     | 2302.34     | 7096.55     | 0.88 | 0.08   | 0.15   | 0.26    | 0.61    |
| 0.48 | 209.78     | 698.19     | 1946.22     | 5849.89     | 0.89 | 0.06   | 0.11   | 0.18    | 0.40    |
| 0.49 | 180.09     | 586.54     | 1607.78     | 5014.62     | 0.90 | 0.05   | 0.08   | 0.13    | 0.27    |
| 0.50 | 149.99     | 485.85     | 1319.26     | 3992.33     |      |        |        |         |         |

Table S64: Critical values for detector  $\hat{H}^m$  and FM-OLS and D-OLS estimation in a model with intercept and linear trend. The number of integrated regressors is 4 and the highest power of  $x_{kt}$  is 3.

| m    | 90 %       | 95 %        | 97,5 %      | 99 %         | m    | 90 %   | 95 %    | 97,5 %  | 99 %     |
|------|------------|-------------|-------------|--------------|------|--------|---------|---------|----------|
| 0.10 | 5960563.67 | 21774377.77 | 65131774.73 | 222953196.83 | 0.51 | 352.78 | 1230.84 | 3502.25 | 11572.28 |
| 0.11 | 3754852.59 | 14002383.92 | 41941348.40 | 133850898.15 | 0.52 | 301.00 | 1043.24 | 2915.84 | 9734.78  |
| 0.12 | 2535504.17 | 9053573.30  | 27390063.72 | 91589713.36  | 0.53 | 253.53 | 869.59  | 2455.50 | 7741.89  |
| 0.13 | 1693301.88 | 6158980.95  | 18778518.76 | 66027223.53  | 0.54 | 212.88 | 727.28  | 2061.96 | 6451.35  |
| 0.14 | 1182575.77 | 4322056.52  | 13329368.50 | 46339420.45  | 0.55 | 179.01 | 606.57  | 1720.98 | 5447.03  |
| 0.15 | 825268.57  | 3055729.31  | 9079391.26  | 32279773.85  | 0.56 | 149.90 | 506.27  | 1456.21 | 4739.39  |
| 0.16 | 587975.91  | 2150608.55  | 6798050.98  | 22392716.13  | 0.57 | 126.05 | 434.58  | 1202.41 | 3832.05  |
| 0.17 | 440620.60  | 1612482.19  | 4852556.52  | 16260757.31  | 0.58 | 104.36 | 359.17  | 1007.26 | 3225.14  |
| 0.18 | 328709.47  | 1212019.08  | 3542857.10  | 11588485.67  | 0.59 | 87.46  | 300.79  | 868.04  | 2622.63  |
| 0.19 | 244243.91  | 903791.04   | 2655003.31  | 8846024.98   | 0.60 | 72.67  | 249.94  | 707.71  | 2240.80  |
| 0.20 | 184107.13  | 670971.00   | 2070420.20  | 7252522.63   | 0.61 | 61.03  | 204.87  | 592.30  | 1844.65  |
| 0.21 | 139932.57  | 519186.75   | 1580909.81  | 5539788.90   | 0.62 | 51.09  | 169.35  | 474.34  | 1499.68  |
| 0.22 | 108057.62  | 395155.28   | 1168309.72  | 4148536.80   | 0.63 | 42.90  | 138.11  | 383.98  | 1272.13  |
| 0.23 | 84317.76   | 313243.29   | 907296.79   | 3200094.11   | 0.64 | 36.27  | 113.93  | 323.97  | 1017.39  |
| 0.24 | 65145.48   | 241866.45   | 728955.43   | 2558331.15   | 0.65 | 30.59  | 93.70   | 261.94  | 812.52   |
| 0.25 | 50694.64   | 186669.18   | 567912.75   | 2028825.77   | 0.66 | 25.36  | 77.45   | 211.77  | 669.68   |
| 0.26 | 40138.35   | 149605.66   | 436397.17   | 1519099.32   | 0.67 | 21.26  | 64.30   | 174.78  | 544.36   |
| 0.27 | 32898.44   | 118586.96   | 347701.51   | 1212305.86   | 0.68 | 17.71  | 53.60   | 142.68  | 436.16   |
| 0.28 | 26244.61   | 94850.71    | 284522.63   | 951850.50    | 0.69 | 14.57  | 44.90   | 119.21  | 351.53   |
| 0.29 | 21627.22   | 77577.03    | 228228.00   | 757066.59    | 0.70 | 12.15  | 37.00   | 95.22   | 285.28   |
| 0.30 | 17370.07   | 63367.86    | 184092.51   | 596495.20    | 0.71 | 9.97   | 29.72   | 77.00   | 232.47   |
| 0.31 | 14170.59   | 52373.09    | 146431.42   | 504242.90    | 0.72 | 8.13   | 24.00   | 62.91   | 189.60   |
| 0.32 | 11572.15   | 42263.21    | 122148.33   | 405596.49    | 0.73 | 6.69   | 19.31   | 49.52   | 149.61   |
| 0.33 | 9526.51    | 34376.31    | 101258.21   | 332926.66    | 0.74 | 5.45   | 15.41   | 40.60   | 118.09   |
| 0.34 | 7843.33    | 29169.61    | 85420.25    | 273325.74    | 0.75 | 4.42   | 12.43   | 32.75   | 95.17    |
| 0.35 | 6327.56    | 23698.18    | 70481.64    | 223903.61    | 0.76 | 3.57   | 9.73    | 25.86   | 74.22    |
| 0.36 | 5175.73    | 19344.35    | 57938.78    | 185094.34    | 0.77 | 2.91   | 7.67    | 20.12   | 58.63    |
| 0.37 | 4347.13    | 15994.06    | 47822.94    | 155614.58    | 0.78 | 2.33   | 6.06    | 15.33   | 45.36    |
| 0.38 | 3570.07    | 12841.70    | 38267.70    | 129420.50    | 0.79 | 1.91   | 4.75    | 11.98   | 35.89    |
| 0.39 | 2934.34    | 10615.79    | 30933.31    | 104456.11    | 0.80 | 1.52   | 3.71    | 9.46    | 27.09    |
| 0.40 | 2450.63    | 8848.79     | 25495.62    | 85974.95     | 0.81 | 1.22   | 2.92    | 7.20    | 20.46    |
| 0.41 | 2023.18    | 7358.57     | 21473.42    | 70259.42     | 0.82 | 0.97   | 2.30    | 5.46    | 15.30    |
| 0.42 | 1673.42    | 6019.65     | 17726.96    | 58755.77     | 0.83 | 0.77   | 1.74    | 4.12    | 11.31    |
| 0.43 | 1375.85    | 5018.66     | 14657.35    | 49025.51     | 0.84 | 0.60   | 1.33    | 3.04    | 8.30     |
| 0.44 | 1162.77    | 4200.86     | 12167.65    | 39627.37     | 0.85 | 0.46   | 1.00    | 2.25    | 5.90     |
| 0.45 | 958.55     | 3474.23     | 10323.78    | 33061.29     | 0.86 | 0.36   | 0.75    | 1.63    | 4.27     |
| 0.46 | 820.41     | 2950.09     | 8553.58     | 28417.96     | 0.87 | 0.27   | 0.55    | 1.17    | 3.10     |
| 0.47 | 698.93     | 2486.54     | 7117.29     | 23655.95     | 0.88 | 0.20   | 0.40    | 0.84    | 2.13     |
| 0.48 | 588.27     | 2098.81     | 5812.76     | 18894.02     | 0.89 | 0.15   | 0.29    | 0.58    | 1.46     |
| 0.49 | 488.51     | 1746.26     | 4937.98     | 16138.24     | 0.90 | 0.11   | 0.21    | 0.40    | 0.97     |
| 0.50 | 417.21     | 1468.93     | 4180.15     | 13755.10     |      |        |         |         |          |

Table S65: Critical values for detector  $\hat{H}^m$  and IM-OLS estimation in a model with intercept and linear trend. The number of integrated regressors is 4 and the highest power of  $x_{kt}$  is 3.

## 2 Detector: $\hat{H}_d^m$

### 2.1 Number of I(1) regressors: 1

| m    | 90 %   | 95 %   | 97,5 % | 99 %   | m    | 90 % | 95 % | 97,5 % | 99 % |
|------|--------|--------|--------|--------|------|------|------|--------|------|
| 0.10 | 158.26 | 302.67 | 512.32 | 939.24 | 0.51 | 1.32 | 2.11 | 3.24   | 5.17 |
| 0.11 | 125.66 | 242.00 | 405.46 | 745.03 | 0.52 | 1.22 | 1.95 | 2.91   | 4.66 |
| 0.12 | 101.91 | 196.29 | 335.01 | 602.18 | 0.53 | 1.12 | 1.76 | 2.64   | 4.15 |
| 0.13 | 83.36  | 158.77 | 273.26 | 495.80 | 0.54 | 1.04 | 1.62 | 2.40   | 3.84 |
| 0.14 | 69.74  | 132.46 | 226.79 | 399.41 | 0.55 | 0.97 | 1.48 | 2.19   | 3.47 |
| 0.15 | 58.63  | 111.74 | 187.85 | 329.17 | 0.56 | 0.90 | 1.37 | 2.01   | 3.21 |
| 0.16 | 50.44  | 94.44  | 158.98 | 281.21 | 0.57 | 0.84 | 1.27 | 1.86   | 2.85 |
| 0.17 | 43.21  | 81.01  | 135.80 | 242.49 | 0.58 | 0.78 | 1.16 | 1.68   | 2.63 |
| 0.18 | 37.44  | 70.03  | 115.39 | 206.23 | 0.59 | 0.73 | 1.09 | 1.56   | 2.38 |
| 0.19 | 32.53  | 61.10  | 100.96 | 178.28 | 0.60 | 0.69 | 1.00 | 1.41   | 2.13 |
| 0.20 | 28.17  | 52.93  | 88.26  | 151.02 | 0.61 | 0.64 | 0.92 | 1.29   | 1.92 |
| 0.21 | 24.77  | 46.11  | 77.73  | 133.56 | 0.62 | 0.60 | 0.86 | 1.18   | 1.74 |
| 0.22 | 21.75  | 40.25  | 68.41  | 117.62 | 0.63 | 0.57 | 0.80 | 1.08   | 1.58 |
| 0.23 | 19.22  | 35.67  | 59.35  | 104.58 | 0.64 | 0.53 | 0.74 | 1.00   | 1.46 |
| 0.24 | 16.98  | 31.34  | 51.93  | 91.79  | 0.65 | 0.51 | 0.70 | 0.94   | 1.33 |
| 0.25 | 15.28  | 27.91  | 47.18  | 82.29  | 0.66 | 0.48 | 0.66 | 0.87   | 1.21 |
| 0.26 | 13.64  | 25.07  | 41.65  | 71.95  | 0.67 | 0.45 | 0.62 | 0.82   | 1.12 |
| 0.27 | 12.18  | 22.34  | 37.20  | 63.31  | 0.68 | 0.43 | 0.59 | 0.77   | 1.05 |
| 0.28 | 10.99  | 19.86  | 32.87  | 56.33  | 0.69 | 0.41 | 0.56 | 0.72   | 0.97 |
| 0.29 | 9.84   | 17.95  | 29.28  | 50.60  | 0.70 | 0.40 | 0.53 | 0.69   | 0.92 |
| 0.30 | 8.88   | 16.02  | 26.01  | 44.88  | 0.71 | 0.38 | 0.51 | 0.66   | 0.87 |
| 0.31 | 8.03   | 14.46  | 23.64  | 41.33  | 0.72 | 0.36 | 0.49 | 0.63   | 0.83 |
| 0.32 | 7.22   | 13.11  | 21.20  | 37.21  | 0.73 | 0.35 | 0.47 | 0.60   | 0.80 |
| 0.33 | 6.55   | 11.75  | 19.20  | 33.32  | 0.74 | 0.34 | 0.45 | 0.58   | 0.78 |
| 0.34 | 5.95   | 10.63  | 17.33  | 30.49  | 0.75 | 0.33 | 0.44 | 0.57   | 0.75 |
| 0.35 | 5.40   | 9.56   | 15.53  | 26.48  | 0.76 | 0.32 | 0.43 | 0.55   | 0.73 |
| 0.36 | 4.93   | 8.71   | 13.98  | 24.16  | 0.77 | 0.31 | 0.42 | 0.54   | 0.72 |
| 0.37 | 4.47   | 7.91   | 12.69  | 21.51  | 0.78 | 0.30 | 0.41 | 0.53   | 0.70 |
| 0.38 | 4.06   | 7.04   | 11.42  | 19.42  | 0.79 | 0.30 | 0.40 | 0.52   | 0.69 |
| 0.39 | 3.66   | 6.36   | 10.26  | 17.53  | 0.80 | 0.29 | 0.40 | 0.52   | 0.68 |
| 0.40 | 3.36   | 5.74   | 9.26   | 15.59  | 0.81 | 0.29 | 0.39 | 0.51   | 0.67 |
| 0.41 | 3.07   | 5.25   | 8.30   | 13.92  | 0.82 | 0.28 | 0.39 | 0.50   | 0.66 |
| 0.42 | 2.80   | 4.80   | 7.59   | 12.50  | 0.83 | 0.28 | 0.38 | 0.50   | 0.66 |
| 0.43 | 2.57   | 4.37   | 6.92   | 11.41  | 0.84 | 0.28 | 0.38 | 0.49   | 0.66 |
| 0.44 | 2.37   | 3.99   | 6.22   | 10.27  | 0.85 | 0.27 | 0.37 | 0.49   | 0.65 |
| 0.45 | 2.17   | 3.64   | 5.72   | 9.48   | 0.86 | 0.27 | 0.37 | 0.48   | 0.64 |
| 0.46 | 1.99   | 3.32   | 5.14   | 8.66   | 0.87 | 0.27 | 0.36 | 0.47   | 0.63 |
| 0.47 | 1.83   | 3.06   | 4.70   | 7.78   | 0.88 | 0.26 | 0.36 | 0.47   | 0.62 |
| 0.48 | 1.69   | 2.77   | 4.31   | 6.98   | 0.89 | 0.26 | 0.36 | 0.46   | 0.62 |
| 0.49 | 1.55   | 2.54   | 3.91   | 6.27   | 0.90 | 0.26 | 0.35 | 0.46   | 0.61 |
| 0.50 | 1.43   | 2.33   | 3.59   | 5.82   |      |      |      |        |      |

Table S66: Critical values for detector  $\hat{H}_d^m$  and FM-OLS and D-OLS estimation in a model with intercept. The number of integrated regressors is 1 and the highest power of  $x_{kt}$  is 1.

| m    | 90 %   | 95 %   | 97,5 %  | 99 %    | m    | 90 % | 95 % | 97,5 % | 99 %  |
|------|--------|--------|---------|---------|------|------|------|--------|-------|
| 0.10 | 304.29 | 628.29 | 1150.71 | 2176.57 | 0.51 | 2.51 | 4.50 | 7.42   | 13.34 |
| 0.11 | 244.91 | 503.68 | 915.52  | 1742.90 | 0.52 | 2.31 | 4.12 | 6.76   | 12.08 |
| 0.12 | 197.68 | 408.65 | 737.35  | 1432.01 | 0.53 | 2.11 | 3.75 | 6.15   | 10.92 |
| 0.13 | 163.87 | 329.85 | 598.76  | 1193.73 | 0.54 | 1.93 | 3.41 | 5.62   | 9.84  |
| 0.14 | 135.65 | 277.12 | 497.63  | 993.74  | 0.55 | 1.77 | 3.13 | 5.11   | 8.87  |
| 0.15 | 113.48 | 232.59 | 423.70  | 819.48  | 0.56 | 1.63 | 2.85 | 4.65   | 8.13  |
| 0.16 | 97.09  | 197.31 | 351.46  | 683.55  | 0.57 | 1.50 | 2.59 | 4.20   | 7.30  |
| 0.17 | 83.18  | 166.31 | 301.41  | 597.13  | 0.58 | 1.38 | 2.37 | 3.85   | 6.67  |
| 0.18 | 72.14  | 145.49 | 260.47  | 509.63  | 0.59 | 1.27 | 2.16 | 3.49   | 6.09  |
| 0.19 | 63.10  | 125.72 | 228.17  | 430.51  | 0.60 | 1.16 | 1.98 | 3.17   | 5.49  |
| 0.20 | 54.48  | 110.08 | 197.06  | 381.82  | 0.61 | 1.07 | 1.81 | 2.89   | 4.97  |
| 0.21 | 48.13  | 96.02  | 174.22  | 333.39  | 0.62 | 0.98 | 1.65 | 2.62   | 4.49  |
| 0.22 | 42.44  | 85.73  | 154.23  | 289.50  | 0.63 | 0.90 | 1.51 | 2.39   | 4.03  |
| 0.23 | 37.22  | 75.05  | 134.05  | 251.87  | 0.64 | 0.83 | 1.38 | 2.18   | 3.62  |
| 0.24 | 32.88  | 65.89  | 117.77  | 222.93  | 0.65 | 0.76 | 1.25 | 1.96   | 3.30  |
| 0.25 | 29.15  | 58.05  | 102.92  | 200.72  | 0.66 | 0.69 | 1.14 | 1.77   | 2.94  |
| 0.26 | 26.09  | 51.75  | 92.20   | 178.66  | 0.67 | 0.63 | 1.03 | 1.59   | 2.64  |
| 0.27 | 23.40  | 46.22  | 82.57   | 155.42  | 0.68 | 0.58 | 0.94 | 1.45   | 2.38  |
| 0.28 | 21.10  | 41.87  | 73.42   | 140.99  | 0.69 | 0.52 | 0.85 | 1.30   | 2.12  |
| 0.29 | 19.10  | 37.38  | 65.27   | 126.33  | 0.70 | 0.47 | 0.77 | 1.16   | 1.90  |
| 0.30 | 17.15  | 33.93  | 58.17   | 111.57  | 0.71 | 0.43 | 0.69 | 1.04   | 1.70  |
| 0.31 | 15.45  | 30.34  | 51.95   | 100.38  | 0.72 | 0.39 | 0.62 | 0.93   | 1.51  |
| 0.32 | 14.06  | 27.38  | 46.87   | 88.94   | 0.73 | 0.35 | 0.56 | 0.83   | 1.36  |
| 0.33 | 12.72  | 24.61  | 42.43   | 79.62   | 0.74 | 0.32 | 0.51 | 0.75   | 1.21  |
| 0.34 | 11.43  | 22.11  | 38.17   | 71.37   | 0.75 | 0.29 | 0.45 | 0.67   | 1.08  |
| 0.35 | 10.41  | 20.05  | 34.14   | 64.66   | 0.76 | 0.26 | 0.41 | 0.60   | 0.95  |
| 0.36 | 9.50   | 18.10  | 31.25   | 58.61   | 0.77 | 0.24 | 0.36 | 0.53   | 0.84  |
| 0.37 | 8.70   | 16.41  | 28.28   | 53.08   | 0.78 | 0.21 | 0.33 | 0.47   | 0.74  |
| 0.38 | 7.87   | 14.88  | 25.65   | 47.79   | 0.79 | 0.19 | 0.29 | 0.42   | 0.65  |
| 0.39 | 7.13   | 13.51  | 23.18   | 43.09   | 0.80 | 0.18 | 0.26 | 0.37   | 0.56  |
| 0.40 | 6.51   | 12.28  | 21.27   | 38.77   | 0.81 | 0.16 | 0.23 | 0.32   | 0.50  |
| 0.41 | 5.93   | 11.15  | 19.35   | 34.35   | 0.82 | 0.15 | 0.21 | 0.29   | 0.43  |
| 0.42 | 5.42   | 10.13  | 17.41   | 31.26   | 0.83 | 0.14 | 0.19 | 0.26   | 0.38  |
| 0.43 | 4.97   | 9.27   | 15.68   | 29.00   | 0.84 | 0.13 | 0.17 | 0.23   | 0.33  |
| 0.44 | 4.56   | 8.45   | 14.28   | 26.05   | 0.85 | 0.12 | 0.16 | 0.21   | 0.29  |
| 0.45 | 4.18   | 7.71   | 13.01   | 23.71   | 0.86 | 0.11 | 0.15 | 0.19   | 0.26  |
| 0.46 | 3.82   | 7.06   | 11.82   | 21.56   | 0.87 | 0.11 | 0.14 | 0.18   | 0.24  |
| 0.47 | 3.51   | 6.40   | 10.73   | 19.43   | 0.88 | 0.10 | 0.13 | 0.17   | 0.23  |
| 0.48 | 3.22   | 5.85   | 9.71    | 17.89   | 0.89 | 0.10 | 0.13 | 0.16   | 0.21  |
| 0.49 | 2.98   | 5.34   | 8.87    | 16.39   | 0.90 | 0.10 | 0.13 | 0.16   | 0.21  |
| 0.50 | 2.73   | 4.90   | 8.16    | 14.83   |      |      |      |        |       |

Table S67: Critical values for detector  $\hat{H}_d^m$  and IM-OLS estimation in a model with intercept. The number of integrated regressors is 1 and the highest power of  $x_{kt}$  is 1.

| m    | 90 %    | 95 %    | 97,5 %  | 99 %     | m    | 90 % | 95 % | 97,5 % | 99 %  |
|------|---------|---------|---------|----------|------|------|------|--------|-------|
| 0.10 | 3316.59 | 5418.80 | 8431.78 | 13581.33 | 0.51 | 4.43 | 6.86 | 10.09  | 15.69 |
| 0.11 | 2370.83 | 3913.12 | 6037.90 | 9867.96  | 0.52 | 3.96 | 6.11 | 8.96   | 13.74 |
| 0.12 | 1760.23 | 2880.21 | 4434.87 | 7169.89  | 0.53 | 3.50 | 5.44 | 8.01   | 12.39 |
| 0.13 | 1333.11 | 2189.13 | 3374.95 | 5434.45  | 0.54 | 3.13 | 4.86 | 7.08   | 10.81 |
| 0.14 | 1020.58 | 1705.23 | 2585.40 | 4212.13  | 0.55 | 2.82 | 4.33 | 6.28   | 9.64  |
| 0.15 | 810.59  | 1324.00 | 2068.79 | 3313.67  | 0.56 | 2.53 | 3.86 | 5.59   | 8.51  |
| 0.16 | 640.56  | 1054.37 | 1613.44 | 2588.06  | 0.57 | 2.26 | 3.45 | 4.92   | 7.46  |
| 0.17 | 520.15  | 847.75  | 1296.21 | 2127.44  | 0.58 | 2.02 | 3.09 | 4.39   | 6.73  |
| 0.18 | 413.60  | 686.30  | 1049.24 | 1734.76  | 0.59 | 1.80 | 2.76 | 3.91   | 5.94  |
| 0.19 | 342.35  | 557.96  | 853.15  | 1405.60  | 0.60 | 1.60 | 2.43 | 3.45   | 5.26  |
| 0.20 | 281.96  | 459.12  | 706.87  | 1156.27  | 0.61 | 1.42 | 2.15 | 3.04   | 4.60  |
| 0.21 | 236.90  | 381.38  | 584.96  | 941.33   | 0.62 | 1.26 | 1.91 | 2.71   | 4.05  |
| 0.22 | 197.52  | 319.96  | 492.69  | 796.60   | 0.63 | 1.12 | 1.69 | 2.41   | 3.57  |
| 0.23 | 168.56  | 271.58  | 416.48  | 672.66   | 0.64 | 1.00 | 1.49 | 2.11   | 3.10  |
| 0.24 | 141.09  | 228.83  | 347.13  | 564.29   | 0.65 | 0.88 | 1.32 | 1.85   | 2.75  |
| 0.25 | 120.97  | 197.35  | 295.97  | 475.06   | 0.66 | 0.79 | 1.17 | 1.63   | 2.40  |
| 0.26 | 103.50  | 166.88  | 252.84  | 404.10   | 0.67 | 0.70 | 1.04 | 1.45   | 2.13  |
| 0.27 | 89.00   | 143.46  | 215.51  | 349.73   | 0.68 | 0.63 | 0.92 | 1.28   | 1.84  |
| 0.28 | 76.56   | 124.15  | 186.33  | 297.05   | 0.69 | 0.56 | 0.82 | 1.13   | 1.64  |
| 0.29 | 66.41   | 107.86  | 163.53  | 257.79   | 0.70 | 0.50 | 0.71 | 0.98   | 1.42  |
| 0.30 | 57.71   | 93.57   | 140.26  | 220.07   | 0.71 | 0.45 | 0.64 | 0.86   | 1.24  |
| 0.31 | 50.18   | 81.28   | 124.28  | 194.50   | 0.72 | 0.41 | 0.56 | 0.76   | 1.09  |
| 0.32 | 44.04   | 70.68   | 107.06  | 169.44   | 0.73 | 0.37 | 0.50 | 0.66   | 0.95  |
| 0.33 | 38.32   | 61.77   | 92.40   | 147.03   | 0.74 | 0.34 | 0.45 | 0.59   | 0.81  |
| 0.34 | 33.54   | 53.97   | 80.23   | 129.11   | 0.75 | 0.31 | 0.40 | 0.52   | 0.71  |
| 0.35 | 29.43   | 47.39   | 70.56   | 115.01   | 0.76 | 0.28 | 0.37 | 0.47   | 0.63  |
| 0.36 | 25.97   | 41.54   | 61.93   | 100.00   | 0.77 | 0.26 | 0.33 | 0.42   | 0.55  |
| 0.37 | 22.85   | 36.43   | 54.00   | 86.72    | 0.78 | 0.24 | 0.31 | 0.38   | 0.49  |
| 0.38 | 20.23   | 32.13   | 48.26   | 75.76    | 0.79 | 0.23 | 0.28 | 0.34   | 0.44  |
| 0.39 | 18.01   | 28.27   | 42.37   | 67.19    | 0.80 | 0.21 | 0.26 | 0.32   | 0.40  |
| 0.40 | 15.82   | 25.05   | 37.27   | 58.97    | 0.81 | 0.20 | 0.25 | 0.30   | 0.37  |
| 0.41 | 13.99   | 22.33   | 33.00   | 51.68    | 0.82 | 0.19 | 0.23 | 0.28   | 0.35  |
| 0.42 | 12.43   | 19.73   | 29.34   | 45.91    | 0.83 | 0.18 | 0.22 | 0.27   | 0.33  |
| 0.43 | 11.09   | 17.51   | 26.03   | 40.61    | 0.84 | 0.17 | 0.21 | 0.25   | 0.31  |
| 0.44 | 9.94    | 15.68   | 23.31   | 35.59    | 0.85 | 0.16 | 0.20 | 0.24   | 0.30  |
| 0.45 | 8.82    | 13.88   | 20.45   | 31.99    | 0.86 | 0.15 | 0.19 | 0.23   | 0.29  |
| 0.46 | 7.85    | 12.29   | 18.01   | 27.99    | 0.87 | 0.15 | 0.19 | 0.22   | 0.28  |
| 0.47 | 6.96    | 10.96   | 16.19   | 25.54    | 0.88 | 0.14 | 0.18 | 0.22   | 0.27  |
| 0.48 | 6.21    | 9.67    | 14.31   | 22.21    | 0.89 | 0.14 | 0.17 | 0.21   | 0.26  |
| 0.49 | 5.54    | 8.58    | 12.63   | 19.63    | 0.90 | 0.13 | 0.17 | 0.20   | 0.25  |
| 0.50 | 4.98    | 7.73    | 11.13   | 17.41    |      |      |      |        |       |

Table S68: Critical values for detector  $\hat{H}_d^m$  and FM-OLS and D-OLS estimation in a model with intercept and linear trend. The number of integrated regressors is 1 and the highest power of  $x_{kt}$  is 1.

| m    | 90 %    | 95 %     | 97,5 %   | 99 %     | m    | 90 % | 95 %  | 97,5 % | 99 %  |
|------|---------|----------|----------|----------|------|------|-------|--------|-------|
| 0.10 | 5800.31 | 10153.49 | 16587.73 | 28779.00 | 0.51 | 7.82 | 12.95 | 20.44  | 33.95 |
| 0.11 | 4164.75 | 7420.78  | 12040.35 | 20976.67 | 0.52 | 7.02 | 11.57 | 18.07  | 29.66 |
| 0.12 | 3075.41 | 5444.28  | 8909.51  | 15596.56 | 0.53 | 6.27 | 10.36 | 15.93  | 26.23 |
| 0.13 | 2301.00 | 4092.61  | 6804.05  | 11634.82 | 0.54 | 5.60 | 9.23  | 14.09  | 23.36 |
| 0.14 | 1785.68 | 3186.71  | 5154.33  | 8923.56  | 0.55 | 4.99 | 8.22  | 12.63  | 20.95 |
| 0.15 | 1415.89 | 2472.56  | 4005.02  | 6982.82  | 0.56 | 4.45 | 7.34  | 11.26  | 18.66 |
| 0.16 | 1123.76 | 1981.27  | 3212.72  | 5485.91  | 0.57 | 4.00 | 6.54  | 10.11  | 16.64 |
| 0.17 | 894.40  | 1582.36  | 2571.99  | 4460.88  | 0.58 | 3.57 | 5.82  | 9.01   | 14.86 |
| 0.18 | 727.89  | 1292.23  | 2119.01  | 3655.25  | 0.59 | 3.22 | 5.22  | 8.00   | 13.06 |
| 0.19 | 599.21  | 1057.08  | 1721.19  | 3030.19  | 0.60 | 2.89 | 4.66  | 7.10   | 11.69 |
| 0.20 | 491.91  | 873.18   | 1436.63  | 2473.47  | 0.61 | 2.58 | 4.14  | 6.30   | 10.36 |
| 0.21 | 411.84  | 721.82   | 1191.88  | 2043.81  | 0.62 | 2.30 | 3.69  | 5.54   | 9.28  |
| 0.22 | 346.83  | 605.00   | 986.78   | 1708.37  | 0.63 | 2.05 | 3.28  | 4.92   | 8.22  |
| 0.23 | 292.74  | 510.94   | 828.10   | 1410.48  | 0.64 | 1.83 | 2.91  | 4.36   | 7.17  |
| 0.24 | 247.52  | 430.89   | 688.26   | 1186.91  | 0.65 | 1.63 | 2.58  | 3.88   | 6.28  |
| 0.25 | 210.78  | 363.93   | 582.43   | 1019.18  | 0.66 | 1.46 | 2.29  | 3.42   | 5.46  |
| 0.26 | 179.66  | 310.80   | 493.56   | 866.27   | 0.67 | 1.30 | 2.02  | 3.01   | 4.81  |
| 0.27 | 154.11  | 265.74   | 422.71   | 729.72   | 0.68 | 1.16 | 1.81  | 2.67   | 4.20  |
| 0.28 | 132.99  | 228.24   | 370.26   | 631.42   | 0.69 | 1.03 | 1.61  | 2.35   | 3.72  |
| 0.29 | 114.87  | 197.62   | 319.31   | 558.57   | 0.70 | 0.91 | 1.42  | 2.08   | 3.23  |
| 0.30 | 99.62   | 171.86   | 278.69   | 481.48   | 0.71 | 0.81 | 1.25  | 1.82   | 2.83  |
| 0.31 | 86.52   | 149.98   | 242.45   | 419.21   | 0.72 | 0.71 | 1.11  | 1.60   | 2.47  |
| 0.32 | 76.11   | 130.65   | 209.48   | 360.94   | 0.73 | 0.63 | 0.97  | 1.40   | 2.16  |
| 0.33 | 66.69   | 113.93   | 182.99   | 310.77   | 0.74 | 0.55 | 0.85  | 1.23   | 1.88  |
| 0.34 | 58.42   | 99.74    | 157.51   | 271.97   | 0.75 | 0.48 | 0.75  | 1.07   | 1.63  |
| 0.35 | 51.39   | 86.96    | 138.80   | 238.27   | 0.76 | 0.42 | 0.65  | 0.93   | 1.40  |
| 0.36 | 45.30   | 76.53    | 121.83   | 205.27   | 0.77 | 0.37 | 0.57  | 0.81   | 1.22  |
| 0.37 | 39.96   | 67.66    | 107.19   | 182.03   | 0.78 | 0.32 | 0.49  | 0.70   | 1.05  |
| 0.38 | 35.16   | 59.80    | 94.62    | 161.78   | 0.79 | 0.28 | 0.43  | 0.60   | 0.90  |
| 0.39 | 31.26   | 52.64    | 83.81    | 143.36   | 0.80 | 0.24 | 0.37  | 0.52   | 0.77  |
| 0.40 | 27.79   | 46.91    | 72.87    | 124.42   | 0.81 | 0.21 | 0.32  | 0.44   | 0.66  |
| 0.41 | 24.67   | 41.44    | 64.72    | 108.74   | 0.82 | 0.18 | 0.27  | 0.38   | 0.56  |
| 0.42 | 21.92   | 36.74    | 57.39    | 96.58    | 0.83 | 0.16 | 0.23  | 0.32   | 0.47  |
| 0.43 | 19.56   | 32.88    | 51.17    | 86.30    | 0.84 | 0.14 | 0.20  | 0.27   | 0.39  |
| 0.44 | 17.39   | 29.31    | 45.45    | 76.41    | 0.85 | 0.13 | 0.17  | 0.23   | 0.33  |
| 0.45 | 15.46   | 26.14    | 41.04    | 67.71    | 0.86 | 0.11 | 0.15  | 0.19   | 0.27  |
| 0.46 | 13.76   | 23.16    | 36.36    | 59.97    | 0.87 | 0.10 | 0.13  | 0.17   | 0.22  |
| 0.47 | 12.30   | 20.75    | 32.41    | 54.23    | 0.88 | 0.09 | 0.12  | 0.15   | 0.19  |
| 0.48 | 10.96   | 18.47    | 29.12    | 48.49    | 0.89 | 0.09 | 0.11  | 0.13   | 0.17  |
| 0.49 | 9.81    | 16.36    | 25.78    | 43.18    | 0.90 | 0.08 | 0.10  | 0.12   | 0.15  |
| 0.50 | 8.75    | 14.57    | 22.84    | 38.11    |      |      |       |        |       |

Table S69: Critical values for detector  $\hat{H}_d^m$  and IM-OLS estimation in a model with intercept and linear trend. The number of integrated regressors is 1 and the highest power of  $x_{kt}$  is 1.

| m    | 90 %     | 95 %     | 97,5 %   | 99 %      | m    | 90 % | 95 %  | 97,5 % | 99 %  |
|------|----------|----------|----------|-----------|------|------|-------|--------|-------|
| 0.10 | 12206.19 | 32259.69 | 73320.64 | 177296.89 | 0.51 | 8.20 | 20.35 | 41.94  | 97.80 |
| 0.11 | 8708.36  | 23277.69 | 53349.51 | 128114.63 | 0.52 | 7.11 | 17.66 | 36.60  | 83.34 |
| 0.12 | 6462.26  | 17247.34 | 38910.80 | 96271.01  | 0.53 | 6.22 | 15.22 | 31.34  | 72.23 |
| 0.13 | 4799.38  | 12655.27 | 28646.63 | 70949.04  | 0.54 | 5.47 | 13.29 | 27.60  | 62.53 |
| 0.14 | 3657.73  | 9641.48  | 21501.54 | 54198.30  | 0.55 | 4.77 | 11.62 | 24.28  | 53.87 |
| 0.15 | 2820.45  | 7477.36  | 16848.30 | 40869.16  | 0.56 | 4.21 | 10.15 | 20.79  | 46.92 |
| 0.16 | 2223.18  | 5894.83  | 13085.35 | 31886.70  | 0.57 | 3.67 | 8.98  | 18.33  | 40.96 |
| 0.17 | 1753.22  | 4629.96  | 10093.19 | 24376.29  | 0.58 | 3.17 | 7.69  | 15.94  | 35.81 |
| 0.18 | 1431.26  | 3736.48  | 8170.59  | 19062.77  | 0.59 | 2.77 | 6.75  | 13.58  | 31.40 |
| 0.19 | 1137.82  | 3042.98  | 6668.46  | 15745.28  | 0.60 | 2.44 | 5.83  | 11.99  | 27.02 |
| 0.20 | 923.12   | 2453.54  | 5383.66  | 12856.50  | 0.61 | 2.14 | 5.01  | 10.20  | 23.07 |
| 0.21 | 742.68   | 1978.22  | 4429.96  | 10832.92  | 0.62 | 1.84 | 4.29  | 8.69   | 19.96 |
| 0.22 | 622.17   | 1621.46  | 3640.59  | 8858.15   | 0.63 | 1.60 | 3.69  | 7.66   | 17.04 |
| 0.23 | 511.73   | 1362.57  | 3037.79  | 7244.30   | 0.64 | 1.38 | 3.18  | 6.46   | 14.13 |
| 0.24 | 429.98   | 1138.51  | 2530.63  | 6122.71   | 0.65 | 1.22 | 2.74  | 5.61   | 12.17 |
| 0.25 | 357.96   | 957.49   | 2130.88  | 5136.90   | 0.66 | 1.06 | 2.33  | 4.71   | 10.16 |
| 0.26 | 304.34   | 787.77   | 1773.79  | 4278.07   | 0.67 | 0.92 | 1.99  | 3.98   | 8.35  |
| 0.27 | 260.97   | 661.66   | 1474.91  | 3572.07   | 0.68 | 0.82 | 1.71  | 3.36   | 7.01  |
| 0.28 | 221.40   | 562.65   | 1245.64  | 3023.04   | 0.69 | 0.73 | 1.45  | 2.87   | 5.98  |
| 0.29 | 188.18   | 481.70   | 1056.64  | 2524.57   | 0.70 | 0.66 | 1.28  | 2.42   | 4.90  |
| 0.30 | 160.24   | 411.96   | 896.81   | 2154.03   | 0.71 | 0.59 | 1.08  | 2.03   | 4.21  |
| 0.31 | 135.67   | 354.53   | 776.84   | 1853.76   | 0.72 | 0.54 | 0.94  | 1.71   | 3.54  |
| 0.32 | 116.24   | 299.44   | 652.27   | 1588.05   | 0.73 | 0.49 | 0.82  | 1.47   | 2.99  |
| 0.33 | 99.31    | 257.98   | 553.52   | 1333.38   | 0.74 | 0.45 | 0.74  | 1.25   | 2.50  |
| 0.34 | 85.45    | 220.28   | 490.50   | 1169.23   | 0.75 | 0.42 | 0.66  | 1.07   | 2.06  |
| 0.35 | 73.44    | 187.27   | 410.65   | 990.08    | 0.76 | 0.39 | 0.60  | 0.92   | 1.74  |
| 0.36 | 64.10    | 161.71   | 353.92   | 828.38    | 0.77 | 0.37 | 0.55  | 0.82   | 1.48  |
| 0.37 | 55.07    | 141.73   | 304.13   | 729.43    | 0.78 | 0.34 | 0.50  | 0.72   | 1.22  |
| 0.38 | 47.49    | 123.72   | 262.80   | 628.45    | 0.79 | 0.33 | 0.47  | 0.66   | 1.01  |
| 0.39 | 41.68    | 106.32   | 227.12   | 540.74    | 0.80 | 0.31 | 0.44  | 0.60   | 0.89  |
| 0.40 | 35.83    | 93.09    | 197.29   | 463.85    | 0.81 | 0.30 | 0.42  | 0.56   | 0.80  |
| 0.41 | 31.27    | 80.09    | 170.87   | 400.03    | 0.82 | 0.29 | 0.40  | 0.53   | 0.73  |
| 0.42 | 27.48    | 70.43    | 151.52   | 347.94    | 0.83 | 0.27 | 0.38  | 0.50   | 0.68  |
| 0.43 | 23.98    | 60.77    | 130.06   | 295.78    | 0.84 | 0.27 | 0.37  | 0.48   | 0.65  |
| 0.44 | 20.79    | 52.25    | 113.83   | 262.47    | 0.85 | 0.26 | 0.36  | 0.46   | 0.63  |
| 0.45 | 18.39    | 45.72    | 97.88    | 228.90    | 0.86 | 0.25 | 0.35  | 0.45   | 0.61  |
| 0.46 | 15.94    | 39.98    | 87.42    | 198.14    | 0.87 | 0.25 | 0.34  | 0.44   | 0.59  |
| 0.47 | 13.94    | 35.10    | 75.31    | 171.26    | 0.88 | 0.24 | 0.34  | 0.43   | 0.58  |
| 0.48 | 12.26    | 30.46    | 64.97    | 148.85    | 0.89 | 0.24 | 0.33  | 0.43   | 0.57  |
| 0.49 | 10.80    | 26.81    | 56.97    | 130.41    | 0.90 | 0.24 | 0.33  | 0.42   | 0.57  |
| 0.50 | 9.31     | 23.10    | 48.83    | 113.30    |      |      |       |        |       |

Table S70: Critical values for detector  $\hat{H}_d^m$  and FM-OLS and D-OLS estimation in a model with intercept. The number of integrated regressors is 1 and the highest power of  $x_{kt}$  is 2.

| m    | 90 %     | 95 %      | 97,5 %    | 99 %      | m    | 90 %  | 95 %  | 97,5 % | 99 %   |
|------|----------|-----------|-----------|-----------|------|-------|-------|--------|--------|
| 0.10 | 39932.26 | 115862.41 | 298731.56 | 809403.06 | 0.51 | 25.51 | 70.56 | 166.86 | 425.84 |
| 0.11 | 28315.28 | 83273.73  | 208533.32 | 602034.81 | 0.52 | 22.19 | 61.29 | 146.07 | 381.66 |
| 0.12 | 20794.91 | 62460.00  | 151226.91 | 437263.19 | 0.53 | 19.23 | 53.25 | 124.96 | 328.84 |
| 0.13 | 15711.01 | 45899.37  | 116606.39 | 315702.32 | 0.54 | 16.78 | 45.72 | 109.88 | 286.97 |
| 0.14 | 11956.48 | 35352.13  | 85276.10  | 235176.23 | 0.55 | 14.76 | 39.85 | 93.55  | 248.88 |
| 0.15 | 9320.75  | 27213.94  | 67104.12  | 176594.99 | 0.56 | 12.83 | 34.58 | 81.39  | 214.11 |
| 0.16 | 7293.46  | 21112.72  | 52659.48  | 141822.24 | 0.57 | 11.23 | 29.92 | 70.61  | 189.57 |
| 0.17 | 5803.87  | 16642.67  | 40963.81  | 113703.44 | 0.58 | 9.72  | 26.45 | 61.23  | 163.86 |
| 0.18 | 4646.84  | 13531.02  | 32483.43  | 90572.50  | 0.59 | 8.53  | 23.07 | 52.96  | 141.14 |
| 0.19 | 3741.04  | 10973.35  | 25491.85  | 72824.38  | 0.60 | 7.46  | 20.17 | 45.76  | 122.73 |
| 0.20 | 3021.11  | 8781.12   | 21465.13  | 59970.81  | 0.61 | 6.49  | 17.67 | 39.78  | 104.29 |
| 0.21 | 2476.77  | 7255.94   | 17701.11  | 49073.66  | 0.62 | 5.69  | 15.32 | 34.36  | 90.91  |
| 0.22 | 2062.16  | 5932.31   | 14464.11  | 40798.05  | 0.63 | 4.99  | 13.20 | 29.61  | 78.24  |
| 0.23 | 1754.36  | 4993.47   | 12136.90  | 33462.82  | 0.64 | 4.33  | 11.43 | 25.39  | 66.47  |
| 0.24 | 1462.70  | 4122.20   | 9923.65   | 27536.39  | 0.65 | 3.73  | 9.84  | 22.04  | 56.24  |
| 0.25 | 1200.63  | 3439.24   | 8413.49   | 23459.44  | 0.66 | 3.21  | 8.49  | 18.73  | 47.65  |
| 0.26 | 1010.25  | 2957.21   | 7106.52   | 20145.20  | 0.67 | 2.76  | 7.33  | 15.88  | 40.83  |
| 0.27 | 856.43   | 2440.77   | 5871.38   | 16482.30  | 0.68 | 2.41  | 6.16  | 13.48  | 33.96  |
| 0.28 | 713.56   | 2040.63   | 5055.16   | 13935.63  | 0.69 | 2.08  | 5.24  | 11.55  | 27.54  |
| 0.29 | 608.70   | 1737.75   | 4241.12   | 11457.19  | 0.70 | 1.79  | 4.48  | 9.71   | 23.29  |
| 0.30 | 514.97   | 1495.05   | 3637.24   | 9535.76   | 0.71 | 1.52  | 3.81  | 8.15   | 19.63  |
| 0.31 | 443.45   | 1275.37   | 3084.39   | 8254.10   | 0.72 | 1.32  | 3.24  | 6.86   | 16.24  |
| 0.32 | 382.79   | 1093.86   | 2640.63   | 7059.59   | 0.73 | 1.13  | 2.74  | 5.72   | 13.63  |
| 0.33 | 329.30   | 945.62    | 2224.34   | 6117.58   | 0.74 | 0.96  | 2.31  | 4.89   | 11.22  |
| 0.34 | 282.90   | 827.54    | 1955.92   | 5203.30   | 0.75 | 0.82  | 1.95  | 4.06   | 9.35   |
| 0.35 | 242.50   | 701.24    | 1671.48   | 4384.24   | 0.76 | 0.70  | 1.64  | 3.43   | 7.95   |
| 0.36 | 208.66   | 598.17    | 1444.75   | 3824.94   | 0.77 | 0.59  | 1.38  | 2.84   | 6.61   |
| 0.37 | 178.72   | 510.25    | 1256.16   | 3263.23   | 0.78 | 0.51  | 1.16  | 2.37   | 5.52   |
| 0.38 | 153.00   | 446.26    | 1074.49   | 2929.34   | 0.79 | 0.42  | 0.96  | 1.99   | 4.50   |
| 0.39 | 131.66   | 380.43    | 917.89    | 2485.16   | 0.80 | 0.36  | 0.81  | 1.61   | 3.62   |
| 0.40 | 113.84   | 324.00    | 792.05    | 2145.06   | 0.81 | 0.30  | 0.67  | 1.32   | 2.88   |
| 0.41 | 98.74    | 281.81    | 687.43    | 1841.09   | 0.82 | 0.25  | 0.54  | 1.07   | 2.37   |
| 0.42 | 86.54    | 247.32    | 598.66    | 1535.94   | 0.83 | 0.21  | 0.44  | 0.86   | 1.88   |
| 0.43 | 76.36    | 213.69    | 522.25    | 1362.56   | 0.84 | 0.18  | 0.36  | 0.70   | 1.53   |
| 0.44 | 67.09    | 186.63    | 456.53    | 1191.05   | 0.85 | 0.15  | 0.28  | 0.55   | 1.19   |
| 0.45 | 57.84    | 162.05    | 387.93    | 1019.77   | 0.86 | 0.13  | 0.23  | 0.43   | 0.92   |
| 0.46 | 50.85    | 141.54    | 338.16    | 878.35    | 0.87 | 0.11  | 0.19  | 0.33   | 0.72   |
| 0.47 | 44.00    | 123.68    | 290.77    | 765.90    | 0.88 | 0.10  | 0.16  | 0.26   | 0.54   |
| 0.48 | 38.51    | 107.34    | 249.83    | 666.51    | 0.89 | 0.09  | 0.13  | 0.21   | 0.40   |
| 0.49 | 33.68    | 93.82     | 218.33    | 574.75    | 0.90 | 0.08  | 0.12  | 0.17   | 0.31   |
| 0.50 | 29.17    | 81.50     | 188.97    | 501.80    |      |       |       |        |        |

Table S71: Critical values for detector  $\hat{H}_d^m$  and IM-OLS estimation in a model with intercept. The number of integrated regressors is 1 and the highest power of  $x_{kt}$  is 2.



| m    | 90 %     | 95 %     | 97,5 %    | 99 %      | m    | 90 %  | 95 %  | 97,5 % | 99 %   |
|------|----------|----------|-----------|-----------|------|-------|-------|--------|--------|
| 0.10 | 21831.86 | 49869.85 | 101453.99 | 231957.04 | 0.51 | 12.44 | 25.17 | 49.32  | 108.08 |
| 0.11 | 15388.69 | 34988.05 | 73500.70  | 167788.74 | 0.52 | 10.85 | 22.00 | 42.17  | 91.74  |
| 0.12 | 11028.38 | 25621.99 | 52267.03  | 121136.89 | 0.53 | 9.49  | 19.05 | 36.11  | 78.70  |
| 0.13 | 8101.12  | 18027.83 | 38282.91  | 90386.88  | 0.54 | 8.30  | 16.61 | 32.01  | 70.18  |
| 0.14 | 6104.34  | 13687.56 | 28350.30  | 67492.78  | 0.55 | 7.29  | 14.44 | 27.77  | 60.80  |
| 0.15 | 4660.41  | 10547.86 | 21733.71  | 50067.22  | 0.56 | 6.41  | 12.76 | 23.86  | 53.25  |
| 0.16 | 3619.06  | 8134.17  | 16692.07  | 38663.12  | 0.57 | 5.69  | 11.07 | 21.17  | 46.16  |
| 0.17 | 2816.08  | 6267.37  | 13058.30  | 28794.88  | 0.58 | 4.92  | 9.65  | 18.26  | 39.14  |
| 0.18 | 2236.84  | 4966.42  | 10165.56  | 23379.14  | 0.59 | 4.35  | 8.35  | 15.67  | 34.36  |
| 0.19 | 1797.09  | 3950.87  | 8186.58   | 18655.54  | 0.60 | 3.76  | 7.28  | 13.86  | 29.24  |
| 0.20 | 1434.68  | 3197.60  | 6668.22   | 14931.78  | 0.61 | 3.28  | 6.31  | 11.72  | 25.02  |
| 0.21 | 1165.82  | 2576.08  | 5403.53   | 12454.41  | 0.62 | 2.84  | 5.43  | 10.08  | 21.51  |
| 0.22 | 958.96   | 2124.86  | 4351.19   | 10014.20  | 0.63 | 2.48  | 4.69  | 8.76   | 18.83  |
| 0.23 | 796.32   | 1749.17  | 3632.07   | 8237.56   | 0.64 | 2.14  | 4.07  | 7.40   | 15.46  |
| 0.24 | 664.50   | 1444.25  | 3034.69   | 7065.39   | 0.65 | 1.86  | 3.49  | 6.46   | 13.28  |
| 0.25 | 550.16   | 1223.99  | 2529.21   | 5865.88   | 0.66 | 1.61  | 3.01  | 5.54   | 11.52  |
| 0.26 | 464.90   | 1013.60  | 2081.49   | 4917.40   | 0.67 | 1.41  | 2.57  | 4.61   | 9.44   |
| 0.27 | 394.35   | 854.02   | 1725.40   | 4098.23   | 0.68 | 1.22  | 2.20  | 3.92   | 8.09   |
| 0.28 | 328.70   | 716.86   | 1452.75   | 3428.95   | 0.69 | 1.05  | 1.89  | 3.34   | 6.79   |
| 0.29 | 279.09   | 613.60   | 1234.01   | 2814.87   | 0.70 | 0.91  | 1.63  | 2.85   | 5.64   |
| 0.30 | 237.16   | 517.39   | 1034.41   | 2472.72   | 0.71 | 0.78  | 1.40  | 2.42   | 4.81   |
| 0.31 | 203.51   | 441.52   | 921.44    | 2099.91   | 0.72 | 0.67  | 1.20  | 2.05   | 4.08   |
| 0.32 | 173.94   | 372.30   | 760.96    | 1787.01   | 0.73 | 0.58  | 1.03  | 1.74   | 3.46   |
| 0.33 | 149.76   | 322.07   | 653.51    | 1526.91   | 0.74 | 0.50  | 0.87  | 1.48   | 2.81   |
| 0.34 | 127.97   | 275.27   | 567.17    | 1290.85   | 0.75 | 0.43  | 0.73  | 1.24   | 2.33   |
| 0.35 | 110.67   | 235.39   | 482.36    | 1127.55   | 0.76 | 0.38  | 0.62  | 1.02   | 1.99   |
| 0.36 | 95.79    | 203.71   | 404.72    | 941.16    | 0.77 | 0.33  | 0.52  | 0.86   | 1.68   |
| 0.37 | 82.27    | 175.90   | 348.37    | 816.15    | 0.78 | 0.29  | 0.44  | 0.71   | 1.34   |
| 0.38 | 70.79    | 153.74   | 300.65    | 712.14    | 0.79 | 0.26  | 0.38  | 0.58   | 1.05   |
| 0.39 | 62.00    | 129.62   | 258.65    | 599.87    | 0.80 | 0.23  | 0.33  | 0.48   | 0.86   |
| 0.40 | 53.79    | 114.08   | 225.85    | 514.66    | 0.81 | 0.21  | 0.29  | 0.40   | 0.69   |
| 0.41 | 47.12    | 98.89    | 193.93    | 437.10    | 0.82 | 0.19  | 0.25  | 0.34   | 0.55   |
| 0.42 | 41.10    | 86.35    | 172.96    | 382.27    | 0.83 | 0.17  | 0.23  | 0.30   | 0.45   |
| 0.43 | 35.79    | 76.37    | 146.18    | 325.39    | 0.84 | 0.16  | 0.21  | 0.27   | 0.37   |
| 0.44 | 31.64    | 65.59    | 127.43    | 281.82    | 0.85 | 0.15  | 0.19  | 0.24   | 0.32   |
| 0.45 | 27.42    | 57.25    | 111.22    | 244.48    | 0.86 | 0.14  | 0.18  | 0.22   | 0.29   |
| 0.46 | 23.95    | 49.78    | 97.92     | 215.23    | 0.87 | 0.13  | 0.17  | 0.21   | 0.27   |
| 0.47 | 21.14    | 43.44    | 85.32     | 183.75    | 0.88 | 0.13  | 0.16  | 0.20   | 0.25   |
| 0.48 | 18.43    | 38.07    | 73.66     | 162.01    | 0.89 | 0.12  | 0.15  | 0.19   | 0.23   |
| 0.49 | 16.18    | 33.01    | 65.27     | 140.74    | 0.90 | 0.12  | 0.15  | 0.18   | 0.22   |
| 0.50 | 14.12    | 28.91    | 56.38     | 122.76    |      |       |       |        |        |

Table S72: Critical values for detector  $\hat{H}_d^m$  and FM-OLS and D-OLS estimation in a model with intercept and linear trend. The number of integrated regressors is 1 and the highest power of  $x_{kt}$  is 2.

| m    | 90 %     | 95 %      | 97,5 %    | 99 %      | m    | 90 %  | 95 %  | 97,5 % | 99 %   |
|------|----------|-----------|-----------|-----------|------|-------|-------|--------|--------|
| 0.10 | 55565.18 | 139406.72 | 309365.50 | 796213.51 | 0.51 | 29.15 | 65.84 | 139.95 | 348.15 |
| 0.11 | 39736.46 | 97566.74  | 220121.33 | 574094.88 | 0.52 | 25.47 | 57.22 | 124.35 | 303.41 |
| 0.12 | 27915.10 | 70546.20  | 162122.87 | 412433.58 | 0.53 | 22.11 | 50.08 | 106.43 | 266.87 |
| 0.13 | 20745.22 | 50934.65  | 116149.26 | 293089.63 | 0.54 | 19.40 | 43.74 | 92.58  | 232.13 |
| 0.14 | 15317.35 | 38775.13  | 86506.70  | 218686.96 | 0.55 | 16.94 | 38.12 | 80.89  | 196.08 |
| 0.15 | 11648.64 | 28926.38  | 65994.02  | 166648.80 | 0.56 | 14.81 | 33.00 | 69.48  | 169.60 |
| 0.16 | 9038.96  | 22704.16  | 50643.39  | 126207.16 | 0.57 | 12.95 | 28.53 | 60.13  | 149.69 |
| 0.17 | 7068.53  | 17486.94  | 39010.13  | 98933.01  | 0.58 | 11.35 | 24.72 | 52.68  | 131.13 |
| 0.18 | 5577.27  | 13884.64  | 30474.15  | 78365.94  | 0.59 | 9.90  | 21.56 | 45.59  | 113.96 |
| 0.19 | 4420.61  | 10954.86  | 24274.39  | 59984.17  | 0.60 | 8.67  | 18.91 | 40.04  | 97.64  |
| 0.20 | 3570.56  | 8632.30   | 19656.00  | 49995.40  | 0.61 | 7.52  | 16.50 | 34.46  | 83.22  |
| 0.21 | 2877.15  | 7097.67   | 15995.02  | 39304.35  | 0.62 | 6.55  | 14.16 | 29.16  | 70.79  |
| 0.22 | 2347.92  | 5717.29   | 12975.87  | 31991.97  | 0.63 | 5.76  | 12.29 | 25.35  | 61.30  |
| 0.23 | 1942.17  | 4797.79   | 10773.46  | 27252.41  | 0.64 | 4.99  | 10.66 | 22.19  | 52.27  |
| 0.24 | 1614.20  | 4013.06   | 9050.77   | 22700.06  | 0.65 | 4.36  | 9.26  | 18.82  | 44.97  |
| 0.25 | 1375.04  | 3345.49   | 7527.07   | 19384.47  | 0.66 | 3.76  | 7.97  | 16.03  | 38.41  |
| 0.26 | 1147.38  | 2797.46   | 6293.49   | 15739.00  | 0.67 | 3.26  | 6.83  | 13.71  | 32.43  |
| 0.27 | 969.69   | 2339.26   | 5169.70   | 12983.96  | 0.68 | 2.83  | 5.88  | 11.81  | 26.96  |
| 0.28 | 816.43   | 1965.92   | 4370.89   | 10878.80  | 0.69 | 2.45  | 5.05  | 10.04  | 22.31  |
| 0.29 | 681.58   | 1676.57   | 3665.21   | 9129.06   | 0.70 | 2.12  | 4.28  | 8.49   | 18.83  |
| 0.30 | 577.73   | 1392.46   | 3107.97   | 7741.09   | 0.71 | 1.84  | 3.69  | 7.10   | 15.79  |
| 0.31 | 493.26   | 1195.90   | 2671.86   | 6709.10   | 0.72 | 1.59  | 3.15  | 6.06   | 13.34  |
| 0.32 | 423.49   | 1043.45   | 2264.52   | 5633.88   | 0.73 | 1.36  | 2.66  | 5.10   | 11.19  |
| 0.33 | 361.56   | 874.54    | 1949.05   | 4775.56   | 0.74 | 1.17  | 2.26  | 4.27   | 9.19   |
| 0.34 | 311.47   | 752.92    | 1661.64   | 4027.12   | 0.75 | 1.00  | 1.91  | 3.55   | 7.62   |
| 0.35 | 264.46   | 630.51    | 1394.89   | 3562.68   | 0.76 | 0.85  | 1.62  | 2.98   | 6.41   |
| 0.36 | 228.05   | 537.40    | 1204.61   | 3045.76   | 0.77 | 0.72  | 1.37  | 2.49   | 5.26   |
| 0.37 | 196.23   | 471.81    | 1051.49   | 2647.16   | 0.78 | 0.61  | 1.15  | 2.10   | 4.36   |
| 0.38 | 168.92   | 402.91    | 912.56    | 2340.35   | 0.79 | 0.52  | 0.96  | 1.75   | 3.54   |
| 0.39 | 146.76   | 347.77    | 786.04    | 2037.50   | 0.80 | 0.43  | 0.80  | 1.44   | 2.88   |
| 0.40 | 127.55   | 302.73    | 675.57    | 1736.77   | 0.81 | 0.36  | 0.66  | 1.18   | 2.34   |
| 0.41 | 110.90   | 264.84    | 582.36    | 1487.54   | 0.82 | 0.30  | 0.54  | 0.96   | 1.91   |
| 0.42 | 96.69    | 228.55    | 501.13    | 1276.08   | 0.83 | 0.25  | 0.44  | 0.77   | 1.56   |
| 0.43 | 84.30    | 200.99    | 437.22    | 1086.97   | 0.84 | 0.20  | 0.36  | 0.62   | 1.25   |
| 0.44 | 73.41    | 175.96    | 381.80    | 960.55    | 0.85 | 0.17  | 0.29  | 0.49   | 0.96   |
| 0.45 | 64.56    | 152.11    | 330.67    | 839.11    | 0.86 | 0.14  | 0.23  | 0.39   | 0.75   |
| 0.46 | 56.48    | 133.39    | 283.57    | 720.59    | 0.87 | 0.11  | 0.18  | 0.30   | 0.57   |
| 0.47 | 49.34    | 116.17    | 245.72    | 609.08    | 0.88 | 0.10  | 0.14  | 0.23   | 0.43   |
| 0.48 | 43.03    | 101.02    | 211.73    | 514.78    | 0.89 | 0.08  | 0.12  | 0.18   | 0.32   |
| 0.49 | 37.60    | 86.94     | 183.33    | 450.16    | 0.90 | 0.07  | 0.10  | 0.14   | 0.24   |
| 0.50 | 32.87    | 74.88     | 161.01    | 395.62    |      |       |       |        |        |

Table S73: Critical values for detector  $\hat{H}_d^m$  and IM-OLS estimation in a model with intercept and linear trend. The number of integrated regressors is 1 and the highest power of  $x_{kt}$  is 2.

| m    | 90 %       | 95 %       | 97,5 %      | 99 %        | m    | 90 %  | 95 %   | 97,5 % | 99 %    |
|------|------------|------------|-------------|-------------|------|-------|--------|--------|---------|
| 0.10 | 1321264.37 | 5005587.04 | 14790619.28 | 49775963.44 | 0.51 | 95.47 | 338.00 | 925.00 | 2911.67 |
| 0.11 | 859078.38  | 3203985.76 | 9832410.89  | 31197444.23 | 0.52 | 79.48 | 287.62 | 785.69 | 2477.09 |
| 0.12 | 573222.40  | 2143819.35 | 6533777.42  | 21068010.21 | 0.53 | 67.77 | 246.15 | 675.45 | 2070.21 |
| 0.13 | 392808.66  | 1500741.31 | 4515166.95  | 14812056.25 | 0.54 | 57.47 | 210.34 | 573.75 | 1732.32 |
| 0.14 | 273271.70  | 1018314.35 | 3223726.15  | 10479899.27 | 0.55 | 47.15 | 173.23 | 476.32 | 1440.56 |
| 0.15 | 196816.43  | 723612.21  | 2193614.57  | 7678771.06  | 0.56 | 39.99 | 142.44 | 402.84 | 1246.93 |
| 0.16 | 143859.59  | 516660.95  | 1550073.99  | 5380352.37  | 0.57 | 33.01 | 115.55 | 332.24 | 998.68  |
| 0.17 | 106741.43  | 386958.80  | 1150525.31  | 3966957.86  | 0.58 | 27.52 | 96.05  | 277.55 | 832.21  |
| 0.18 | 79921.71   | 288720.07  | 846453.03   | 2988446.67  | 0.59 | 23.03 | 78.98  | 225.09 | 706.27  |
| 0.19 | 60213.80   | 218842.08  | 648076.29   | 2209020.85  | 0.60 | 18.95 | 65.96  | 187.13 | 592.35  |
| 0.20 | 45563.42   | 165509.75  | 504057.03   | 1653984.98  | 0.61 | 15.86 | 54.54  | 153.04 | 477.79  |
| 0.21 | 35676.52   | 128811.76  | 386616.64   | 1271028.34  | 0.62 | 12.89 | 44.87  | 125.36 | 388.83  |
| 0.22 | 27641.52   | 101110.41  | 303299.65   | 1021196.94  | 0.63 | 11.01 | 37.24  | 104.05 | 318.64  |
| 0.23 | 21666.56   | 80250.74   | 229889.55   | 759259.35   | 0.64 | 9.10  | 30.86  | 84.32  | 259.45  |
| 0.24 | 17087.28   | 62422.61   | 181080.70   | 594623.68   | 0.65 | 7.56  | 25.82  | 68.09  | 203.10  |
| 0.25 | 13512.05   | 48826.13   | 143236.85   | 479765.15   | 0.66 | 6.24  | 21.23  | 55.53  | 163.14  |
| 0.26 | 10733.05   | 38897.78   | 113042.05   | 370576.27   | 0.67 | 5.10  | 16.98  | 44.56  | 134.32  |
| 0.27 | 8540.33    | 31245.34   | 92032.43    | 288538.86   | 0.68 | 4.31  | 13.82  | 35.60  | 106.31  |
| 0.28 | 6955.31    | 24917.13   | 70733.09    | 222942.26   | 0.69 | 3.48  | 11.20  | 29.55  | 89.55   |
| 0.29 | 5539.70    | 20210.84   | 56626.92    | 183284.95   | 0.70 | 2.84  | 9.25   | 23.47  | 69.85   |
| 0.30 | 4561.17    | 16570.24   | 47303.69    | 150462.31   | 0.71 | 2.31  | 7.43   | 19.02  | 55.78   |
| 0.31 | 3735.13    | 13430.80   | 38466.64    | 125762.07   | 0.72 | 1.88  | 5.96   | 15.51  | 45.79   |
| 0.32 | 3028.03    | 11005.56   | 32097.95    | 105159.45   | 0.73 | 1.53  | 4.80   | 12.26  | 35.61   |
| 0.33 | 2473.12    | 9225.81    | 26474.06    | 82268.02    | 0.74 | 1.24  | 3.89   | 9.75   | 28.13   |
| 0.34 | 2032.34    | 7551.41    | 21996.29    | 68968.74    | 0.75 | 1.01  | 3.11   | 7.97   | 22.33   |
| 0.35 | 1707.62    | 6161.27    | 17933.57    | 58644.57    | 0.76 | 0.83  | 2.45   | 6.25   | 17.31   |
| 0.36 | 1424.85    | 5157.33    | 14765.09    | 47948.04    | 0.77 | 0.70  | 1.94   | 4.89   | 13.39   |
| 0.37 | 1164.21    | 4276.68    | 12261.50    | 38649.39    | 0.78 | 0.60  | 1.50   | 3.82   | 10.24   |
| 0.38 | 968.69     | 3546.17    | 10205.46    | 31830.85    | 0.79 | 0.52  | 1.20   | 2.99   | 7.93    |
| 0.39 | 795.85     | 2910.13    | 8383.78     | 26254.37    | 0.80 | 0.46  | 0.96   | 2.28   | 6.20    |
| 0.40 | 668.53     | 2414.94    | 6889.47     | 22137.54    | 0.81 | 0.41  | 0.77   | 1.72   | 4.72    |
| 0.41 | 549.73     | 2001.60    | 5778.42     | 18505.88    | 0.82 | 0.37  | 0.65   | 1.31   | 3.58    |
| 0.42 | 458.38     | 1669.91    | 4774.11     | 15311.91    | 0.83 | 0.34  | 0.56   | 1.00   | 2.64    |
| 0.43 | 389.08     | 1406.09    | 4061.05     | 12629.76    | 0.84 | 0.32  | 0.49   | 0.81   | 1.97    |
| 0.44 | 323.69     | 1167.65    | 3320.80     | 10265.02    | 0.85 | 0.30  | 0.44   | 0.67   | 1.37    |
| 0.45 | 275.83     | 975.76     | 2711.95     | 8705.34     | 0.86 | 0.28  | 0.41   | 0.59   | 1.02    |
| 0.46 | 230.01     | 824.35     | 2381.25     | 7071.83     | 0.87 | 0.26  | 0.38   | 0.53   | 0.83    |
| 0.47 | 193.84     | 681.18     | 1952.27     | 6088.59     | 0.88 | 0.25  | 0.36   | 0.48   | 0.70    |
| 0.48 | 162.68     | 567.24     | 1586.35     | 4891.48     | 0.89 | 0.24  | 0.34   | 0.45   | 0.63    |
| 0.49 | 137.99     | 479.66     | 1323.97     | 4079.71     | 0.90 | 0.23  | 0.33   | 0.43   | 0.59    |
| 0.50 | 114.94     | 403.68     | 1124.91     | 3532.73     |      |       |        |        |         |

Table S74: Critical values for detector  $\hat{H}_d^m$  and FM-OLS and D-OLS estimation in a model with intercept. The number of integrated regressors is 1 and the highest power of  $x_{kt}$  is 3.

| m    | 90 %       | 95 %        | 97,5 %       | 99 %         | m    | 90 %   | 95 %    | 97,5 %  | 99 %     |
|------|------------|-------------|--------------|--------------|------|--------|---------|---------|----------|
| 0.10 | 6965744.47 | 29360299.90 | 100158404.76 | 367798571.94 | 0.51 | 474.06 | 1821.86 | 5781.99 | 21844.30 |
| 0.11 | 4548168.27 | 18638500.36 | 63791182.25  | 236453712.38 | 0.52 | 393.94 | 1538.09 | 4863.85 | 18679.15 |
| 0.12 | 3004871.37 | 12524606.21 | 40602074.37  | 149026548.71 | 0.53 | 330.55 | 1287.59 | 4146.42 | 15702.79 |
| 0.13 | 2068686.68 | 8621290.37  | 27800096.34  | 101681407.98 | 0.54 | 276.59 | 1091.29 | 3438.65 | 12952.27 |
| 0.14 | 1451365.25 | 6064227.47  | 20029679.35  | 71481816.82  | 0.55 | 233.59 | 916.41  | 2841.61 | 10525.35 |
| 0.15 | 1026237.72 | 4349734.51  | 14260383.70  | 52555604.57  | 0.56 | 197.19 | 766.23  | 2392.07 | 8708.15  |
| 0.16 | 744209.19  | 3084873.36  | 10248345.63  | 37963136.10  | 0.57 | 164.64 | 649.42  | 1986.10 | 7223.82  |
| 0.17 | 542829.39  | 2283187.04  | 7644136.41   | 28055334.41  | 0.58 | 136.79 | 538.28  | 1686.76 | 6034.77  |
| 0.18 | 401605.59  | 1728519.50  | 5760242.28   | 21631306.08  | 0.59 | 113.79 | 447.47  | 1386.33 | 5073.18  |
| 0.19 | 311810.50  | 1264912.84  | 4256200.03   | 16271539.15  | 0.60 | 93.46  | 371.53  | 1161.52 | 4247.44  |
| 0.20 | 236290.05  | 958815.36   | 3244148.69   | 12552042.91  | 0.61 | 77.61  | 302.79  | 974.39  | 3444.95  |
| 0.21 | 180626.98  | 736430.29   | 2482806.79   | 9711088.77   | 0.62 | 64.87  | 257.33  | 786.59  | 2839.78  |
| 0.22 | 139924.72  | 581204.44   | 1935912.81   | 7534586.12   | 0.63 | 54.26  | 206.77  | 635.93  | 2307.88  |
| 0.23 | 112506.68  | 459136.76   | 1514195.79   | 5744745.80   | 0.64 | 44.66  | 173.08  | 518.94  | 1855.62  |
| 0.24 | 88832.39   | 362267.47   | 1163292.77   | 4515982.33   | 0.65 | 37.19  | 142.16  | 428.91  | 1473.32  |
| 0.25 | 70232.81   | 280549.49   | 896329.85    | 3489456.94   | 0.66 | 30.75  | 115.90  | 341.74  | 1217.38  |
| 0.26 | 55909.46   | 225359.77   | 710666.81    | 2735465.72   | 0.67 | 24.98  | 92.73   | 277.91  | 1022.72  |
| 0.27 | 43784.63   | 184591.64   | 575912.32    | 2227630.80   | 0.68 | 20.63  | 76.71   | 225.39  | 792.39   |
| 0.28 | 35565.71   | 146537.41   | 470199.35    | 1761862.85   | 0.69 | 17.09  | 63.88   | 184.24  | 614.02   |
| 0.29 | 28609.78   | 117191.73   | 371166.57    | 1393272.35   | 0.70 | 14.19  | 52.52   | 150.98  | 496.06   |
| 0.30 | 23163.18   | 95363.88    | 305789.12    | 1114260.81   | 0.71 | 11.53  | 42.27   | 124.32  | 401.94   |
| 0.31 | 19124.34   | 80166.36    | 256351.00    | 932681.94    | 0.72 | 9.36   | 34.06   | 100.17  | 328.25   |
| 0.32 | 15822.02   | 66037.29    | 211782.77    | 774621.29    | 0.73 | 7.58   | 27.65   | 80.47   | 270.74   |
| 0.33 | 12857.07   | 55031.22    | 174107.84    | 634651.89    | 0.74 | 6.20   | 22.21   | 64.46   | 213.19   |
| 0.34 | 10589.26   | 45370.88    | 142782.38    | 523562.97    | 0.75 | 5.01   | 17.90   | 51.42   | 163.94   |
| 0.35 | 8710.49    | 36891.52    | 117721.02    | 420453.71    | 0.76 | 4.03   | 14.07   | 40.03   | 127.50   |
| 0.36 | 7186.41    | 30194.17    | 98218.63     | 357128.36    | 0.77 | 3.22   | 11.12   | 31.17   | 98.71    |
| 0.37 | 5909.71    | 24451.26    | 82188.53     | 292673.39    | 0.78 | 2.52   | 8.65    | 24.56   | 77.42    |
| 0.38 | 4906.75    | 20625.48    | 68237.15     | 246718.59    | 0.79 | 2.00   | 6.83    | 19.34   | 60.42    |
| 0.39 | 4172.68    | 17033.04    | 56229.47     | 206451.06    | 0.80 | 1.57   | 5.39    | 14.96   | 47.17    |
| 0.40 | 3475.12    | 14192.77    | 45637.90     | 172421.00    | 0.81 | 1.23   | 4.22    | 11.54   | 36.01    |
| 0.41 | 2846.79    | 11552.14    | 38381.56     | 145038.13    | 0.82 | 0.96   | 3.28    | 8.93    | 27.40    |
| 0.42 | 2375.46    | 9679.81     | 31756.10     | 119116.76    | 0.83 | 0.74   | 2.49    | 6.82    | 21.02    |
| 0.43 | 1978.27    | 8088.78     | 26150.32     | 95229.57     | 0.84 | 0.56   | 1.85    | 5.12    | 16.12    |
| 0.44 | 1618.55    | 6744.87     | 21347.60     | 78723.84     | 0.85 | 0.42   | 1.40    | 3.82    | 11.65    |
| 0.45 | 1386.69    | 5520.20     | 17809.49     | 65394.77     | 0.86 | 0.32   | 1.03    | 2.76    | 8.34     |
| 0.46 | 1142.17    | 4602.95     | 14971.93     | 54184.92     | 0.87 | 0.23   | 0.75    | 1.95    | 5.93     |
| 0.47 | 954.67     | 3891.80     | 12390.23     | 43666.73     | 0.88 | 0.17   | 0.53    | 1.36    | 4.11     |
| 0.48 | 790.73     | 3199.35     | 10373.50     | 37840.21     | 0.89 | 0.13   | 0.37    | 0.96    | 2.87     |
| 0.49 | 660.71     | 2669.12     | 8419.94      | 31334.86     | 0.90 | 0.10   | 0.26    | 0.63    | 1.88     |
| 0.50 | 557.53     | 2220.11     | 6954.49      | 25637.91     |      |        |         |         |          |

Table S75: Critical values for detector  $\hat{H}_d^m$  and IM-OLS estimation in a model with intercept. The number of integrated regressors is 1 and the highest power of  $x_{kt}$  is 3.

| m    | 90 %       | 95 %       | 97,5 %      | 99 %        | m    | 90 %   | 95 %   | 97,5 % | 99 %    |
|------|------------|------------|-------------|-------------|------|--------|--------|--------|---------|
| 0.10 | 1828043.24 | 6475168.86 | 17962415.41 | 56701049.37 | 0.51 | 102.63 | 357.61 | 982.36 | 2970.02 |
| 0.11 | 1180104.47 | 4158707.97 | 11783988.14 | 36769981.71 | 0.52 | 86.27  | 304.86 | 814.49 | 2558.35 |
| 0.12 | 771556.03  | 2702854.54 | 7933095.63  | 24639036.64 | 0.53 | 73.55  | 257.17 | 698.96 | 2112.13 |
| 0.13 | 519862.75  | 1873074.18 | 5410393.77  | 17339866.41 | 0.54 | 62.26  | 218.66 | 596.93 | 1780.70 |
| 0.14 | 353146.60  | 1262995.08 | 3715668.94  | 12237617.48 | 0.55 | 51.29  | 182.24 | 488.20 | 1490.29 |
| 0.15 | 249741.19  | 874094.48  | 2561694.26  | 8692828.94  | 0.56 | 43.29  | 149.29 | 417.41 | 1264.30 |
| 0.16 | 179419.92  | 619193.22  | 1790118.54  | 6008343.16  | 0.57 | 35.94  | 124.10 | 347.39 | 1025.40 |
| 0.17 | 132354.78  | 461574.44  | 1284484.03  | 4346572.10  | 0.58 | 29.91  | 102.30 | 288.27 | 851.37  |
| 0.18 | 98362.19   | 340814.73  | 965375.78   | 3287484.11  | 0.59 | 24.99  | 83.90  | 235.87 | 719.42  |
| 0.19 | 73917.97   | 254985.94  | 734366.18   | 2429434.42  | 0.60 | 20.44  | 68.93  | 196.81 | 603.19  |
| 0.20 | 56482.56   | 192850.37  | 560616.28   | 1831527.93  | 0.61 | 17.22  | 57.95  | 158.11 | 493.28  |
| 0.21 | 42664.40   | 148686.68  | 430691.15   | 1396133.31  | 0.62 | 14.06  | 47.45  | 130.45 | 399.98  |
| 0.22 | 32666.68   | 115223.22  | 337819.71   | 1112477.09  | 0.63 | 11.92  | 39.37  | 107.55 | 331.10  |
| 0.23 | 25547.45   | 91148.11   | 250603.41   | 830860.10   | 0.64 | 9.93   | 32.96  | 88.63  | 273.29  |
| 0.24 | 20017.52   | 70523.42   | 200451.35   | 638526.81   | 0.65 | 8.26   | 26.76  | 71.58  | 215.36  |
| 0.25 | 15599.15   | 55184.00   | 156481.03   | 511798.23   | 0.66 | 6.94   | 22.34  | 57.75  | 165.48  |
| 0.26 | 12237.69   | 44107.05   | 126142.04   | 388916.12   | 0.67 | 5.65   | 17.86  | 47.11  | 139.62  |
| 0.27 | 9953.64    | 34688.39   | 100185.61   | 314179.77   | 0.68 | 4.73   | 14.57  | 37.49  | 110.46  |
| 0.28 | 7945.63    | 27953.19   | 77704.35    | 242207.56   | 0.69 | 3.83   | 11.98  | 31.21  | 92.41   |
| 0.29 | 6419.34    | 21993.52   | 63443.27    | 197685.19   | 0.70 | 3.17   | 9.81   | 24.82  | 73.17   |
| 0.30 | 5155.02    | 17979.76   | 51412.12    | 161195.26   | 0.71 | 2.62   | 7.98   | 20.22  | 57.98   |
| 0.31 | 4191.73    | 14729.83   | 41778.33    | 130107.46   | 0.72 | 2.12   | 6.43   | 16.15  | 47.91   |
| 0.32 | 3395.08    | 12200.21   | 34273.91    | 110135.83   | 0.73 | 1.76   | 5.16   | 12.83  | 37.48   |
| 0.33 | 2826.40    | 10200.63   | 28406.76    | 89705.08    | 0.74 | 1.43   | 4.16   | 10.32  | 29.41   |
| 0.34 | 2277.08    | 8243.39    | 23197.76    | 73554.73    | 0.75 | 1.15   | 3.36   | 8.49   | 22.85   |
| 0.35 | 1889.00    | 6755.56    | 19011.98    | 62154.49    | 0.76 | 0.95   | 2.62   | 6.50   | 18.02   |
| 0.36 | 1583.55    | 5587.50    | 15791.28    | 51053.63    | 0.77 | 0.76   | 2.11   | 5.25   | 14.01   |
| 0.37 | 1284.86    | 4515.18    | 12782.51    | 41257.23    | 0.78 | 0.61   | 1.68   | 4.08   | 10.58   |
| 0.38 | 1065.79    | 3802.58    | 10785.46    | 34321.37    | 0.79 | 0.49   | 1.31   | 3.15   | 8.38    |
| 0.39 | 871.91     | 3052.66    | 8774.07     | 28082.82    | 0.80 | 0.40   | 1.02   | 2.46   | 6.53    |
| 0.40 | 732.90     | 2572.95    | 7205.82     | 22861.95    | 0.81 | 0.33   | 0.79   | 1.85   | 4.91    |
| 0.41 | 601.98     | 2140.10    | 5999.35     | 18885.13    | 0.82 | 0.27   | 0.60   | 1.41   | 3.72    |
| 0.42 | 505.05     | 1773.87    | 5038.72     | 15783.90    | 0.83 | 0.23   | 0.46   | 1.03   | 2.74    |
| 0.43 | 422.91     | 1473.06    | 4168.24     | 12876.27    | 0.84 | 0.20   | 0.35   | 0.78   | 2.04    |
| 0.44 | 356.05     | 1239.13    | 3472.94     | 10690.99    | 0.85 | 0.18   | 0.28   | 0.57   | 1.47    |
| 0.45 | 301.33     | 1036.74    | 2843.35     | 8807.32     | 0.86 | 0.16   | 0.24   | 0.41   | 1.06    |
| 0.46 | 250.90     | 869.36     | 2452.53     | 7417.42     | 0.87 | 0.15   | 0.20   | 0.31   | 0.73    |
| 0.47 | 209.09     | 718.41     | 2037.00     | 6341.84     | 0.88 | 0.14   | 0.18   | 0.25   | 0.49    |
| 0.48 | 177.64     | 599.44     | 1645.14     | 5217.90     | 0.89 | 0.13   | 0.16   | 0.22   | 0.36    |
| 0.49 | 148.53     | 511.63     | 1405.81     | 4185.74     | 0.90 | 0.12   | 0.15   | 0.19   | 0.27    |
| 0.50 | 122.79     | 426.06     | 1179.14     | 3610.48     |      |        |        |        |         |

Table S76: Critical values for detector  $\hat{H}_d^m$  and FM-OLS and D-OLS estimation in a model with intercept and linear trend. The number of integrated regressors is 1 and the highest power of  $x_{kt}$  is 3.

| m    | 90 %       | 95 %        | 97,5 %      | 99 %         | m    | 90 %   | 95 %    | 97,5 %  | 99 %     |
|------|------------|-------------|-------------|--------------|------|--------|---------|---------|----------|
| 0.10 | 7417276.55 | 28520716.81 | 91280312.78 | 315491839.41 | 0.51 | 386.02 | 1487.86 | 4532.41 | 15917.76 |
| 0.11 | 4751701.45 | 18230780.34 | 59462284.80 | 208766792.44 | 0.52 | 324.89 | 1246.96 | 3638.99 | 13279.86 |
| 0.12 | 3152211.05 | 11865348.99 | 37498005.06 | 140298384.68 | 0.53 | 273.74 | 1039.13 | 3115.13 | 10925.37 |
| 0.13 | 2103209.73 | 8139382.81  | 25291032.41 | 90312648.89  | 0.54 | 227.32 | 861.58  | 2625.69 | 9343.95  |
| 0.14 | 1451226.85 | 5680302.99  | 17464040.59 | 62895313.28  | 0.55 | 189.84 | 725.42  | 2245.17 | 7891.42  |
| 0.15 | 1027535.98 | 3961132.35  | 12356589.67 | 44094941.22  | 0.56 | 160.37 | 603.53  | 1917.86 | 6453.84  |
| 0.16 | 721788.62  | 2766704.88  | 8737770.84  | 31104799.58  | 0.57 | 135.62 | 504.39  | 1566.40 | 5456.58  |
| 0.17 | 524976.86  | 2068056.14  | 6419021.10  | 23292701.21  | 0.58 | 113.17 | 425.03  | 1273.19 | 4524.12  |
| 0.18 | 387632.50  | 1519403.28  | 4737373.46  | 17728913.62  | 0.59 | 93.67  | 346.61  | 1033.31 | 3751.15  |
| 0.19 | 295140.13  | 1130774.44  | 3558114.35  | 13554956.36  | 0.60 | 77.34  | 284.60  | 852.75  | 3123.02  |
| 0.20 | 220280.09  | 851789.48   | 2749807.14  | 9835069.29   | 0.61 | 63.90  | 238.05  | 710.11  | 2527.37  |
| 0.21 | 167032.54  | 647574.29   | 2104193.84  | 7786801.10   | 0.62 | 53.55  | 198.92  | 577.36  | 2024.12  |
| 0.22 | 128919.47  | 504788.94   | 1596905.45  | 6011760.95   | 0.63 | 44.99  | 161.79  | 482.96  | 1663.57  |
| 0.23 | 102728.49  | 393296.74   | 1241442.34  | 4587258.35   | 0.64 | 37.06  | 135.19  | 398.43  | 1354.26  |
| 0.24 | 79903.27   | 303177.98   | 935134.26   | 3517806.47   | 0.65 | 30.89  | 110.78  | 331.63  | 1065.61  |
| 0.25 | 62994.85   | 243527.56   | 752474.92   | 2685587.96   | 0.66 | 25.24  | 91.07   | 266.79  | 870.38   |
| 0.26 | 50216.23   | 198040.68   | 586529.92   | 2121883.37   | 0.67 | 21.03  | 73.13   | 214.55  | 692.35   |
| 0.27 | 39707.81   | 154443.23   | 463154.01   | 1655715.16   | 0.68 | 17.46  | 60.84   | 172.52  | 565.59   |
| 0.28 | 31899.00   | 120937.38   | 367733.94   | 1261197.66   | 0.69 | 14.41  | 49.68   | 138.04  | 451.87   |
| 0.29 | 25404.18   | 99399.37    | 293092.12   | 1018433.59   | 0.70 | 11.76  | 40.31   | 112.67  | 384.04   |
| 0.30 | 20476.47   | 79759.89    | 242497.58   | 854136.42    | 0.71 | 9.47   | 33.10   | 92.45   | 311.51   |
| 0.31 | 16546.36   | 66719.77    | 199110.22   | 670586.53    | 0.72 | 7.76   | 26.76   | 75.97   | 249.49   |
| 0.32 | 13515.31   | 55025.46    | 165317.59   | 554075.98    | 0.73 | 6.27   | 21.81   | 61.76   | 202.46   |
| 0.33 | 11234.80   | 44505.66    | 135936.44   | 472449.06    | 0.74 | 5.11   | 17.32   | 48.21   | 153.16   |
| 0.34 | 9145.91    | 36484.05    | 112519.40   | 390945.08    | 0.75 | 4.13   | 14.01   | 38.94   | 120.56   |
| 0.35 | 7449.32    | 30083.76    | 94162.06    | 332339.78    | 0.76 | 3.37   | 11.08   | 31.08   | 95.59    |
| 0.36 | 6203.95    | 24333.81    | 76964.35    | 276485.42    | 0.77 | 2.72   | 8.83    | 24.61   | 76.35    |
| 0.37 | 5047.59    | 19785.01    | 62975.97    | 222444.13    | 0.78 | 2.14   | 7.08    | 19.31   | 59.79    |
| 0.38 | 4174.07    | 16403.50    | 52309.02    | 183672.85    | 0.79 | 1.72   | 5.48    | 14.88   | 46.06    |
| 0.39 | 3487.12    | 13772.46    | 42980.63    | 157682.43    | 0.80 | 1.36   | 4.27    | 11.56   | 34.55    |
| 0.40 | 2910.41    | 11009.70    | 34782.06    | 136611.21    | 0.81 | 1.07   | 3.29    | 8.99    | 26.75    |
| 0.41 | 2411.51    | 9283.20     | 29207.72    | 111718.09    | 0.82 | 0.84   | 2.54    | 6.92    | 21.36    |
| 0.42 | 1998.89    | 7712.96     | 24410.07    | 90270.65     | 0.83 | 0.65   | 1.98    | 5.19    | 16.01    |
| 0.43 | 1676.02    | 6317.15     | 20210.28    | 71141.47     | 0.84 | 0.49   | 1.49    | 3.87    | 11.79    |
| 0.44 | 1397.56    | 5280.65     | 16682.83    | 59118.46     | 0.85 | 0.38   | 1.10    | 2.86    | 8.37     |
| 0.45 | 1164.20    | 4429.64     | 13935.19    | 48795.05     | 0.86 | 0.29   | 0.82    | 2.11    | 6.02     |
| 0.46 | 961.26     | 3701.98     | 11312.59    | 40675.25     | 0.87 | 0.22   | 0.59    | 1.52    | 4.18     |
| 0.47 | 801.10     | 3079.49     | 9479.13     | 33827.44     | 0.88 | 0.16   | 0.42    | 1.06    | 2.92     |
| 0.48 | 672.85     | 2572.33     | 7964.52     | 27991.84     | 0.89 | 0.12   | 0.30    | 0.72    | 2.05     |
| 0.49 | 553.70     | 2154.92     | 6562.51     | 23593.85     | 0.90 | 0.09   | 0.21    | 0.48    | 1.35     |
| 0.50 | 456.63     | 1779.31     | 5434.63     | 19732.14     |      |        |         |         |          |

Table S77: Critical values for detector  $\hat{H}_d^m$  and IM-OLS estimation in a model with intercept and linear trend. The number of integrated regressors is 1 and the highest power of  $x_{kt}$  is 3.

## 2.2 Number of I(1) regressors: 2

| m    | 90 %   | 95 %   | 97,5 %  | 99 %    | m    | 90 % | 95 % | 97,5 % | 99 %  |
|------|--------|--------|---------|---------|------|------|------|--------|-------|
| 0.10 | 433.44 | 773.63 | 1234.08 | 2057.33 | 0.51 | 2.57 | 4.23 | 6.28   | 10.01 |
| 0.11 | 346.84 | 607.89 | 955.83  | 1569.21 | 0.52 | 2.33 | 3.82 | 5.76   | 9.14  |
| 0.12 | 277.69 | 491.24 | 782.64  | 1286.55 | 0.53 | 2.10 | 3.43 | 5.23   | 8.29  |
| 0.13 | 226.32 | 401.59 | 638.24  | 1073.80 | 0.54 | 1.89 | 3.12 | 4.69   | 7.42  |
| 0.14 | 188.54 | 331.36 | 527.15  | 879.31  | 0.55 | 1.72 | 2.82 | 4.22   | 6.53  |
| 0.15 | 158.64 | 279.42 | 440.47  | 739.36  | 0.56 | 1.57 | 2.54 | 3.80   | 5.92  |
| 0.16 | 135.18 | 234.83 | 372.73  | 608.02  | 0.57 | 1.42 | 2.30 | 3.39   | 5.31  |
| 0.17 | 115.20 | 200.88 | 317.66  | 513.07  | 0.58 | 1.27 | 2.07 | 3.06   | 4.75  |
| 0.18 | 98.73  | 170.99 | 270.96  | 442.23  | 0.59 | 1.16 | 1.87 | 2.77   | 4.26  |
| 0.19 | 84.76  | 147.02 | 232.65  | 382.15  | 0.60 | 1.06 | 1.68 | 2.46   | 3.82  |
| 0.20 | 73.89  | 128.11 | 202.87  | 331.15  | 0.61 | 0.96 | 1.51 | 2.24   | 3.42  |
| 0.21 | 64.11  | 111.34 | 177.71  | 290.65  | 0.62 | 0.86 | 1.34 | 1.97   | 3.05  |
| 0.22 | 55.77  | 97.32  | 153.10  | 253.09  | 0.63 | 0.78 | 1.21 | 1.78   | 2.70  |
| 0.23 | 49.03  | 85.13  | 133.21  | 219.54  | 0.64 | 0.70 | 1.09 | 1.60   | 2.44  |
| 0.24 | 43.27  | 74.78  | 118.58  | 192.59  | 0.65 | 0.64 | 0.98 | 1.43   | 2.14  |
| 0.25 | 38.62  | 66.27  | 102.29  | 170.18  | 0.66 | 0.58 | 0.89 | 1.26   | 1.90  |
| 0.26 | 34.11  | 58.60  | 91.07   | 149.54  | 0.67 | 0.53 | 0.80 | 1.13   | 1.65  |
| 0.27 | 30.23  | 51.86  | 80.98   | 132.12  | 0.68 | 0.48 | 0.71 | 1.01   | 1.49  |
| 0.28 | 26.74  | 45.89  | 72.11   | 117.81  | 0.69 | 0.44 | 0.64 | 0.90   | 1.32  |
| 0.29 | 23.78  | 41.11  | 63.40   | 103.70  | 0.70 | 0.40 | 0.58 | 0.80   | 1.17  |
| 0.30 | 21.34  | 36.30  | 56.28   | 92.72   | 0.71 | 0.37 | 0.53 | 0.71   | 1.05  |
| 0.31 | 19.07  | 32.21  | 49.98   | 83.11   | 0.72 | 0.35 | 0.49 | 0.65   | 0.94  |
| 0.32 | 17.17  | 29.12  | 45.01   | 73.14   | 0.73 | 0.32 | 0.44 | 0.59   | 0.82  |
| 0.33 | 15.43  | 26.26  | 40.57   | 66.27   | 0.74 | 0.30 | 0.41 | 0.54   | 0.74  |
| 0.34 | 13.92  | 23.59  | 35.92   | 59.42   | 0.75 | 0.28 | 0.38 | 0.50   | 0.68  |
| 0.35 | 12.55  | 21.35  | 32.49   | 52.95   | 0.76 | 0.26 | 0.36 | 0.46   | 0.62  |
| 0.36 | 11.32  | 19.34  | 29.39   | 47.15   | 0.77 | 0.25 | 0.33 | 0.43   | 0.58  |
| 0.37 | 10.18  | 17.36  | 26.35   | 42.08   | 0.78 | 0.24 | 0.32 | 0.41   | 0.55  |
| 0.38 | 9.23   | 15.74  | 23.95   | 37.90   | 0.79 | 0.23 | 0.30 | 0.39   | 0.52  |
| 0.39 | 8.34   | 14.16  | 21.74   | 34.11   | 0.80 | 0.22 | 0.29 | 0.37   | 0.50  |
| 0.40 | 7.52   | 12.69  | 19.51   | 31.21   | 0.81 | 0.21 | 0.28 | 0.36   | 0.49  |
| 0.41 | 6.84   | 11.55  | 17.83   | 27.97   | 0.82 | 0.20 | 0.27 | 0.35   | 0.47  |
| 0.42 | 6.19   | 10.48  | 16.10   | 25.27   | 0.83 | 0.20 | 0.27 | 0.35   | 0.47  |
| 0.43 | 5.65   | 9.46   | 14.43   | 23.21   | 0.84 | 0.20 | 0.26 | 0.34   | 0.46  |
| 0.44 | 5.14   | 8.63   | 13.18   | 21.14   | 0.85 | 0.19 | 0.26 | 0.33   | 0.46  |
| 0.45 | 4.62   | 7.78   | 11.91   | 18.98   | 0.86 | 0.19 | 0.26 | 0.33   | 0.45  |
| 0.46 | 4.19   | 6.96   | 10.76   | 16.81   | 0.87 | 0.19 | 0.25 | 0.33   | 0.45  |
| 0.47 | 3.81   | 6.32   | 9.66    | 15.18   | 0.88 | 0.19 | 0.25 | 0.32   | 0.44  |
| 0.48 | 3.45   | 5.67   | 8.55    | 13.84   | 0.89 | 0.18 | 0.25 | 0.32   | 0.43  |
| 0.49 | 3.10   | 5.15   | 7.82    | 12.31   | 0.90 | 0.18 | 0.24 | 0.32   | 0.43  |
| 0.50 | 2.83   | 4.66   | 7.03    | 11.13   |      |      |      |        |       |

Table S78: Critical values for detector  $\hat{H}_d^n$  and FM-OLS and D-OLS estimation in a model with intercept. The number of integrated regressors is 2 and the highest power of  $x_{kt}$  is 1.

| m    | 90 %   | 95 %    | 97,5 %  | 99 %    | m    | 90 % | 95 % | 97,5 % | 99 %  |
|------|--------|---------|---------|---------|------|------|------|--------|-------|
| 0.10 | 877.60 | 1631.79 | 2713.03 | 4720.08 | 0.51 | 5.10 | 8.79 | 14.01  | 24.01 |
| 0.11 | 691.60 | 1270.42 | 2152.97 | 3698.68 | 0.52 | 4.63 | 7.91 | 12.69  | 21.54 |
| 0.12 | 556.92 | 1039.68 | 1723.40 | 3011.88 | 0.53 | 4.20 | 7.19 | 11.54  | 19.51 |
| 0.13 | 458.65 | 852.41  | 1424.10 | 2491.63 | 0.54 | 3.81 | 6.55 | 10.50  | 17.51 |
| 0.14 | 380.34 | 705.85  | 1183.99 | 2065.20 | 0.55 | 3.46 | 5.94 | 9.47   | 15.72 |
| 0.15 | 317.42 | 585.41  | 976.17  | 1721.15 | 0.56 | 3.13 | 5.36 | 8.43   | 14.05 |
| 0.16 | 267.31 | 495.30  | 817.57  | 1471.54 | 0.57 | 2.84 | 4.84 | 7.57   | 12.68 |
| 0.17 | 227.12 | 422.12  | 700.38  | 1216.52 | 0.58 | 2.59 | 4.38 | 6.84   | 11.44 |
| 0.18 | 194.65 | 357.83  | 591.12  | 1044.88 | 0.59 | 2.34 | 3.97 | 6.20   | 10.31 |
| 0.19 | 168.41 | 311.18  | 515.46  | 901.13  | 0.60 | 2.12 | 3.59 | 5.56   | 9.41  |
| 0.20 | 148.12 | 273.72  | 444.20  | 782.19  | 0.61 | 1.92 | 3.23 | 5.02   | 8.40  |
| 0.21 | 128.96 | 236.67  | 386.02  | 681.01  | 0.62 | 1.73 | 2.93 | 4.55   | 7.50  |
| 0.22 | 112.60 | 206.70  | 336.90  | 603.29  | 0.63 | 1.57 | 2.63 | 4.06   | 6.73  |
| 0.23 | 99.34  | 182.10  | 295.91  | 521.62  | 0.64 | 1.41 | 2.37 | 3.66   | 5.96  |
| 0.24 | 87.09  | 158.93  | 263.22  | 458.49  | 0.65 | 1.27 | 2.11 | 3.29   | 5.28  |
| 0.25 | 76.77  | 139.50  | 232.21  | 411.54  | 0.66 | 1.14 | 1.88 | 2.93   | 4.76  |
| 0.26 | 67.83  | 124.18  | 205.70  | 367.13  | 0.67 | 1.03 | 1.70 | 2.61   | 4.28  |
| 0.27 | 60.20  | 110.34  | 182.23  | 319.94  | 0.68 | 0.93 | 1.52 | 2.33   | 3.82  |
| 0.28 | 53.46  | 96.78   | 160.75  | 285.23  | 0.69 | 0.83 | 1.36 | 2.08   | 3.33  |
| 0.29 | 47.65  | 86.45   | 140.69  | 251.10  | 0.70 | 0.74 | 1.21 | 1.84   | 2.94  |
| 0.30 | 42.57  | 77.68   | 126.23  | 222.81  | 0.71 | 0.66 | 1.08 | 1.62   | 2.58  |
| 0.31 | 37.95  | 68.56   | 113.09  | 196.13  | 0.72 | 0.59 | 0.96 | 1.43   | 2.28  |
| 0.32 | 34.06  | 61.44   | 100.66  | 174.10  | 0.73 | 0.52 | 0.85 | 1.26   | 1.99  |
| 0.33 | 30.61  | 55.01   | 90.06   | 155.38  | 0.74 | 0.46 | 0.75 | 1.11   | 1.74  |
| 0.34 | 27.54  | 49.23   | 80.69   | 137.35  | 0.75 | 0.41 | 0.66 | 0.98   | 1.52  |
| 0.35 | 24.80  | 44.64   | 71.44   | 122.60  | 0.76 | 0.36 | 0.58 | 0.85   | 1.33  |
| 0.36 | 22.15  | 39.76   | 65.05   | 110.56  | 0.77 | 0.32 | 0.51 | 0.74   | 1.15  |
| 0.37 | 20.08  | 35.97   | 58.26   | 101.09  | 0.78 | 0.28 | 0.44 | 0.64   | 0.98  |
| 0.38 | 18.16  | 32.23   | 52.12   | 90.23   | 0.79 | 0.24 | 0.39 | 0.55   | 0.85  |
| 0.39 | 16.43  | 29.03   | 46.98   | 82.24   | 0.80 | 0.21 | 0.33 | 0.47   | 0.73  |
| 0.40 | 14.85  | 26.21   | 42.32   | 72.67   | 0.81 | 0.18 | 0.28 | 0.41   | 0.62  |
| 0.41 | 13.52  | 23.76   | 38.37   | 65.41   | 0.82 | 0.16 | 0.24 | 0.35   | 0.53  |
| 0.42 | 12.25  | 21.56   | 34.72   | 59.13   | 0.83 | 0.13 | 0.21 | 0.30   | 0.45  |
| 0.43 | 11.00  | 19.55   | 31.44   | 53.34   | 0.84 | 0.11 | 0.18 | 0.25   | 0.37  |
| 0.44 | 10.06  | 17.77   | 28.63   | 47.83   | 0.85 | 0.10 | 0.15 | 0.21   | 0.31  |
| 0.45 | 9.11   | 16.12   | 25.73   | 43.70   | 0.86 | 0.09 | 0.13 | 0.17   | 0.26  |
| 0.46 | 8.27   | 14.49   | 23.28   | 39.40   | 0.87 | 0.08 | 0.11 | 0.15   | 0.21  |
| 0.47 | 7.53   | 13.19   | 21.01   | 35.96   | 0.88 | 0.07 | 0.09 | 0.12   | 0.17  |
| 0.48 | 6.79   | 12.00   | 18.97   | 32.22   | 0.89 | 0.07 | 0.08 | 0.11   | 0.14  |
| 0.49 | 6.19   | 10.84   | 17.12   | 29.07   | 0.90 | 0.06 | 0.08 | 0.09   | 0.13  |
| 0.50 | 5.65   | 9.79    | 15.50   | 26.61   |      |      |      |        |       |

Table S79: Critical values for detector  $\hat{H}_d^m$  and IM-OLS estimation in a model with intercept. The number of integrated regressors is 2 and the highest power of  $x_{kt}$  is 1.



| m    | 90 %    | 95 %     | 97,5 %   | 99 %     | m    | 90 % | 95 %  | 97,5 % | 99 %  |
|------|---------|----------|----------|----------|------|------|-------|--------|-------|
| 0.10 | 6372.20 | 10454.22 | 15917.26 | 24897.76 | 0.51 | 7.23 | 11.46 | 16.72  | 25.53 |
| 0.11 | 4585.83 | 7508.46  | 11361.08 | 17670.64 | 0.52 | 6.42 | 10.20 | 14.94  | 23.03 |
| 0.12 | 3440.76 | 5568.91  | 8323.49  | 13106.19 | 0.53 | 5.68 | 9.03  | 13.11  | 19.99 |
| 0.13 | 2582.69 | 4221.60  | 6430.08  | 10012.76 | 0.54 | 5.04 | 7.98  | 11.67  | 17.65 |
| 0.14 | 1994.83 | 3261.60  | 4896.57  | 7747.76  | 0.55 | 4.47 | 7.05  | 10.25  | 15.94 |
| 0.15 | 1552.51 | 2547.23  | 3838.21  | 6068.02  | 0.56 | 3.96 | 6.22  | 9.15   | 13.82 |
| 0.16 | 1229.14 | 2000.51  | 3030.12  | 4724.95  | 0.57 | 3.53 | 5.54  | 8.02   | 12.33 |
| 0.17 | 993.02  | 1621.67  | 2438.46  | 3827.54  | 0.58 | 3.15 | 4.95  | 7.21   | 10.78 |
| 0.18 | 795.63  | 1323.84  | 1964.33  | 3110.36  | 0.59 | 2.78 | 4.38  | 6.24   | 9.47  |
| 0.19 | 652.55  | 1061.33  | 1599.61  | 2518.49  | 0.60 | 2.47 | 3.82  | 5.55   | 8.27  |
| 0.20 | 535.09  | 882.05   | 1323.64  | 2048.06  | 0.61 | 2.19 | 3.40  | 4.87   | 7.22  |
| 0.21 | 445.70  | 730.30   | 1091.49  | 1689.19  | 0.62 | 1.92 | 3.00  | 4.26   | 6.33  |
| 0.22 | 370.42  | 604.09   | 907.72   | 1412.45  | 0.63 | 1.70 | 2.63  | 3.80   | 5.55  |
| 0.23 | 311.17  | 513.99   | 769.18   | 1203.41  | 0.64 | 1.50 | 2.34  | 3.31   | 4.89  |
| 0.24 | 266.33  | 432.44   | 648.03   | 1008.11  | 0.65 | 1.32 | 2.04  | 2.90   | 4.31  |
| 0.25 | 224.79  | 364.33   | 542.41   | 846.94   | 0.66 | 1.17 | 1.80  | 2.58   | 3.81  |
| 0.26 | 192.69  | 310.41   | 460.69   | 720.83   | 0.67 | 1.03 | 1.59  | 2.24   | 3.34  |
| 0.27 | 163.70  | 265.68   | 392.12   | 606.36   | 0.68 | 0.90 | 1.39  | 1.97   | 2.89  |
| 0.28 | 138.92  | 226.94   | 339.94   | 532.74   | 0.69 | 0.79 | 1.21  | 1.71   | 2.53  |
| 0.29 | 120.01  | 194.41   | 293.21   | 455.83   | 0.70 | 0.70 | 1.06  | 1.49   | 2.20  |
| 0.30 | 104.05  | 169.18   | 254.50   | 396.70   | 0.71 | 0.60 | 0.92  | 1.31   | 1.90  |
| 0.31 | 90.00   | 146.46   | 219.15   | 345.28   | 0.72 | 0.53 | 0.80  | 1.14   | 1.66  |
| 0.32 | 78.27   | 126.99   | 190.53   | 299.47   | 0.73 | 0.46 | 0.69  | 0.97   | 1.43  |
| 0.33 | 68.15   | 110.41   | 166.79   | 261.72   | 0.74 | 0.40 | 0.59  | 0.83   | 1.23  |
| 0.34 | 60.01   | 97.04    | 145.60   | 229.39   | 0.75 | 0.35 | 0.51  | 0.71   | 1.04  |
| 0.35 | 52.28   | 84.69    | 126.17   | 197.33   | 0.76 | 0.31 | 0.44  | 0.61   | 0.89  |
| 0.36 | 46.02   | 73.85    | 110.80   | 172.12   | 0.77 | 0.28 | 0.38  | 0.52   | 0.75  |
| 0.37 | 40.30   | 65.20    | 97.79    | 152.65   | 0.78 | 0.25 | 0.34  | 0.44   | 0.63  |
| 0.38 | 35.42   | 56.86    | 85.81    | 134.13   | 0.79 | 0.22 | 0.29  | 0.38   | 0.52  |
| 0.39 | 31.23   | 50.14    | 74.69    | 116.81   | 0.80 | 0.20 | 0.26  | 0.33   | 0.45  |
| 0.40 | 27.52   | 44.47    | 66.30    | 102.66   | 0.81 | 0.18 | 0.24  | 0.29   | 0.39  |
| 0.41 | 24.29   | 38.95    | 57.54    | 90.26    | 0.82 | 0.17 | 0.21  | 0.26   | 0.34  |
| 0.42 | 21.56   | 34.54    | 51.63    | 80.36    | 0.83 | 0.16 | 0.20  | 0.24   | 0.30  |
| 0.43 | 19.04   | 30.66    | 45.40    | 70.83    | 0.84 | 0.15 | 0.18  | 0.22   | 0.28  |
| 0.44 | 16.90   | 27.12    | 39.69    | 62.23    | 0.85 | 0.14 | 0.17  | 0.21   | 0.26  |
| 0.45 | 14.91   | 23.96    | 35.55    | 54.90    | 0.86 | 0.13 | 0.16  | 0.19   | 0.24  |
| 0.46 | 13.16   | 20.99    | 31.14    | 48.11    | 0.87 | 0.13 | 0.16  | 0.19   | 0.23  |
| 0.47 | 11.74   | 18.67    | 27.63    | 42.30    | 0.88 | 0.12 | 0.15  | 0.18   | 0.22  |
| 0.48 | 10.37   | 16.47    | 24.32    | 36.89    | 0.89 | 0.12 | 0.14  | 0.17   | 0.22  |
| 0.49 | 9.12    | 14.50    | 21.31    | 32.68    | 0.90 | 0.11 | 0.14  | 0.17   | 0.21  |
| 0.50 | 8.17    | 13.01    | 18.96    | 28.84    |      |      |       |        |       |

Table S80: Critical values for detector  $\hat{H}_d^m$  and FM-OLS and D-OLS estimation in a model with intercept and linear trend. The number of integrated regressors is 2 and the highest power of  $x_{kt}$  is 1.

| m    | 90 %     | 95 %     | 97,5 %   | 99 %     | m    | 90 %  | 95 %  | 97,5 % | 99 %  |
|------|----------|----------|----------|----------|------|-------|-------|--------|-------|
| 0.10 | 12097.22 | 21054.59 | 33493.04 | 54855.31 | 0.51 | 13.97 | 23.04 | 35.47  | 57.18 |
| 0.11 | 8789.02  | 15023.02 | 23827.81 | 40461.73 | 0.52 | 12.36 | 20.52 | 31.54  | 50.49 |
| 0.12 | 6488.24  | 11029.85 | 17366.58 | 29168.13 | 0.53 | 10.97 | 18.34 | 28.04  | 43.98 |
| 0.13 | 4916.30  | 8376.62  | 12971.15 | 21191.97 | 0.54 | 9.77  | 16.24 | 24.64  | 39.28 |
| 0.14 | 3779.71  | 6486.26  | 10011.84 | 16371.05 | 0.55 | 8.64  | 14.32 | 21.72  | 34.72 |
| 0.15 | 2948.06  | 5014.49  | 7891.63  | 13106.12 | 0.56 | 7.68  | 12.70 | 19.36  | 30.87 |
| 0.16 | 2340.02  | 4001.48  | 6347.75  | 10310.34 | 0.57 | 6.77  | 11.29 | 17.20  | 27.75 |
| 0.17 | 1878.77  | 3213.10  | 5093.93  | 8352.10  | 0.58 | 6.06  | 10.04 | 15.42  | 24.49 |
| 0.18 | 1516.82  | 2603.50  | 4112.16  | 6812.76  | 0.59 | 5.38  | 8.87  | 13.68  | 21.43 |
| 0.19 | 1236.44  | 2128.71  | 3337.79  | 5635.55  | 0.60 | 4.75  | 7.86  | 12.03  | 19.04 |
| 0.20 | 1020.13  | 1743.89  | 2756.18  | 4612.81  | 0.61 | 4.23  | 6.91  | 10.54  | 16.65 |
| 0.21 | 842.38   | 1455.93  | 2296.22  | 3796.05  | 0.62 | 3.72  | 6.12  | 9.16   | 14.67 |
| 0.22 | 707.26   | 1213.72  | 1925.73  | 3160.65  | 0.63 | 3.27  | 5.39  | 8.01   | 12.77 |
| 0.23 | 595.99   | 1020.58  | 1613.77  | 2652.73  | 0.64 | 2.93  | 4.73  | 7.03   | 11.15 |
| 0.24 | 503.12   | 861.81   | 1375.52  | 2257.56  | 0.65 | 2.60  | 4.19  | 6.24   | 9.72  |
| 0.25 | 427.65   | 736.65   | 1146.06  | 1920.95  | 0.66 | 2.30  | 3.68  | 5.52   | 8.57  |
| 0.26 | 365.19   | 621.10   | 979.88   | 1589.16  | 0.67 | 2.03  | 3.25  | 4.85   | 7.49  |
| 0.27 | 308.63   | 529.11   | 831.03   | 1366.44  | 0.68 | 1.78  | 2.88  | 4.25   | 6.59  |
| 0.28 | 266.05   | 454.77   | 717.57   | 1176.18  | 0.69 | 1.57  | 2.52  | 3.71   | 5.79  |
| 0.29 | 231.34   | 391.14   | 607.42   | 999.29   | 0.70 | 1.38  | 2.20  | 3.26   | 5.04  |
| 0.30 | 199.29   | 338.59   | 524.43   | 878.46   | 0.71 | 1.21  | 1.92  | 2.85   | 4.37  |
| 0.31 | 171.16   | 293.10   | 456.81   | 769.71   | 0.72 | 1.06  | 1.67  | 2.47   | 3.81  |
| 0.32 | 149.16   | 252.98   | 398.22   | 672.99   | 0.73 | 0.91  | 1.44  | 2.14   | 3.33  |
| 0.33 | 129.77   | 222.21   | 348.78   | 579.00   | 0.74 | 0.79  | 1.25  | 1.86   | 2.86  |
| 0.34 | 113.92   | 195.63   | 302.62   | 501.52   | 0.75 | 0.69  | 1.08  | 1.60   | 2.45  |
| 0.35 | 100.06   | 171.86   | 265.46   | 438.21   | 0.76 | 0.60  | 0.93  | 1.36   | 2.07  |
| 0.36 | 87.69    | 149.56   | 233.20   | 388.86   | 0.77 | 0.52  | 0.80  | 1.16   | 1.76  |
| 0.37 | 77.27    | 131.26   | 203.69   | 336.07   | 0.78 | 0.44  | 0.69  | 0.98   | 1.49  |
| 0.38 | 67.27    | 115.13   | 180.36   | 293.88   | 0.79 | 0.38  | 0.58  | 0.83   | 1.25  |
| 0.39 | 59.00    | 101.36   | 159.16   | 263.02   | 0.80 | 0.32  | 0.49  | 0.71   | 1.06  |
| 0.40 | 52.35    | 88.72    | 139.76   | 230.45   | 0.81 | 0.27  | 0.42  | 0.60   | 0.88  |
| 0.41 | 46.24    | 78.91    | 122.21   | 201.76   | 0.82 | 0.23  | 0.35  | 0.50   | 0.74  |
| 0.42 | 40.80    | 69.09    | 107.35   | 177.67   | 0.83 | 0.19  | 0.29  | 0.42   | 0.61  |
| 0.43 | 36.04    | 61.35    | 94.79    | 157.13   | 0.84 | 0.16  | 0.24  | 0.35   | 0.51  |
| 0.44 | 32.16    | 54.16    | 83.52    | 137.63   | 0.85 | 0.13  | 0.20  | 0.28   | 0.41  |
| 0.45 | 28.47    | 48.20    | 74.18    | 122.48   | 0.86 | 0.11  | 0.16  | 0.23   | 0.34  |
| 0.46 | 25.22    | 42.29    | 65.68    | 107.09   | 0.87 | 0.09  | 0.13  | 0.18   | 0.27  |
| 0.47 | 22.25    | 37.60    | 57.55    | 94.73    | 0.88 | 0.08  | 0.11  | 0.15   | 0.21  |
| 0.48 | 19.89    | 33.11    | 51.09    | 83.73    | 0.89 | 0.07  | 0.09  | 0.12   | 0.17  |
| 0.49 | 17.64    | 29.45    | 45.74    | 73.58    | 0.90 | 0.06  | 0.08  | 0.10   | 0.13  |
| 0.50 | 15.75    | 26.07    | 40.28    | 64.62    |      |       |       |        |       |

Table S81: Critical values for detector  $\hat{H}_d^m$  and IM-OLS estimation in a model with intercept and linear trend. The number of integrated regressors is 2 and the highest power of  $x_{kt}$  is 1.

| m    | 90 %     | 95 %     | 97,5 %   | 99 %      | m    | 90 %  | 95 %  | 97,5 % | 99 %   |
|------|----------|----------|----------|-----------|------|-------|-------|--------|--------|
| 0.10 | 13448.63 | 34084.57 | 75630.52 | 185049.06 | 0.51 | 10.20 | 22.89 | 46.25  | 101.61 |
| 0.11 | 9664.70  | 24985.97 | 55779.84 | 134200.57 | 0.52 | 9.02  | 20.02 | 40.02  | 86.77  |
| 0.12 | 7094.32  | 18240.47 | 40328.51 | 99133.38  | 0.53 | 7.73  | 17.41 | 34.71  | 75.12  |
| 0.13 | 5283.57  | 13617.76 | 28999.71 | 72596.58  | 0.54 | 6.79  | 15.36 | 30.41  | 65.10  |
| 0.14 | 4155.54  | 10438.72 | 22944.89 | 55625.35  | 0.55 | 5.97  | 13.37 | 26.31  | 56.80  |
| 0.15 | 3234.87  | 8087.65  | 17893.30 | 43054.52  | 0.56 | 5.19  | 11.57 | 23.02  | 49.74  |
| 0.16 | 2489.48  | 6384.68  | 14116.49 | 34113.87  | 0.57 | 4.61  | 10.16 | 20.04  | 43.69  |
| 0.17 | 1965.82  | 5040.01  | 11219.64 | 27482.41  | 0.58 | 4.03  | 8.83  | 17.01  | 36.91  |
| 0.18 | 1590.69  | 3995.68  | 8978.87  | 21995.26  | 0.59 | 3.55  | 7.59  | 14.90  | 31.68  |
| 0.19 | 1280.19  | 3216.17  | 7079.57  | 17117.57  | 0.60 | 3.13  | 6.64  | 12.83  | 26.58  |
| 0.20 | 1048.52  | 2638.75  | 5745.28  | 14381.67  | 0.61 | 2.74  | 5.79  | 11.37  | 23.67  |
| 0.21 | 860.27   | 2177.86  | 4775.92  | 11646.09  | 0.62 | 2.38  | 5.03  | 9.83   | 21.05  |
| 0.22 | 712.90   | 1804.01  | 3858.78  | 9413.05   | 0.63 | 2.10  | 4.42  | 8.63   | 18.18  |
| 0.23 | 590.05   | 1497.56  | 3199.94  | 7544.24   | 0.64 | 1.84  | 3.84  | 7.36   | 15.97  |
| 0.24 | 492.26   | 1245.51  | 2646.59  | 6451.87   | 0.65 | 1.61  | 3.34  | 6.38   | 13.27  |
| 0.25 | 412.72   | 1050.18  | 2244.20  | 5354.43   | 0.66 | 1.39  | 2.84  | 5.37   | 11.19  |
| 0.26 | 349.00   | 879.46   | 1920.89  | 4504.73   | 0.67 | 1.20  | 2.44  | 4.52   | 9.61   |
| 0.27 | 297.00   | 750.37   | 1619.10  | 3834.47   | 0.68 | 1.04  | 2.11  | 3.87   | 8.17   |
| 0.28 | 249.14   | 630.51   | 1386.44  | 3301.70   | 0.69 | 0.91  | 1.82  | 3.34   | 7.09   |
| 0.29 | 215.09   | 538.87   | 1165.50  | 2739.67   | 0.70 | 0.78  | 1.54  | 2.85   | 5.82   |
| 0.30 | 183.97   | 457.52   | 985.61   | 2347.86   | 0.71 | 0.68  | 1.32  | 2.44   | 5.05   |
| 0.31 | 160.68   | 389.25   | 838.38   | 2007.81   | 0.72 | 0.60  | 1.12  | 2.04   | 4.17   |
| 0.32 | 137.36   | 331.57   | 706.98   | 1693.52   | 0.73 | 0.52  | 0.95  | 1.71   | 3.55   |
| 0.33 | 117.10   | 284.39   | 596.87   | 1372.42   | 0.74 | 0.46  | 0.81  | 1.43   | 2.80   |
| 0.34 | 100.49   | 243.58   | 512.45   | 1173.57   | 0.75 | 0.41  | 0.69  | 1.19   | 2.32   |
| 0.35 | 86.17    | 207.72   | 437.60   | 1014.78   | 0.76 | 0.36  | 0.59  | 1.00   | 1.95   |
| 0.36 | 75.03    | 182.11   | 381.02   | 865.01    | 0.77 | 0.32  | 0.51  | 0.84   | 1.63   |
| 0.37 | 65.91    | 156.59   | 334.08   | 746.27    | 0.78 | 0.29  | 0.45  | 0.71   | 1.30   |
| 0.38 | 56.87    | 137.39   | 291.78   | 654.56    | 0.79 | 0.27  | 0.40  | 0.61   | 1.06   |
| 0.39 | 50.04    | 118.38   | 249.41   | 568.42    | 0.80 | 0.25  | 0.36  | 0.53   | 0.86   |
| 0.40 | 43.58    | 103.58   | 216.94   | 500.23    | 0.81 | 0.23  | 0.33  | 0.47   | 0.73   |
| 0.41 | 37.75    | 90.08    | 189.97   | 447.13    | 0.82 | 0.22  | 0.30  | 0.42   | 0.63   |
| 0.42 | 33.33    | 77.85    | 161.83   | 374.29    | 0.83 | 0.20  | 0.29  | 0.38   | 0.56   |
| 0.43 | 28.91    | 68.08    | 140.04   | 324.91    | 0.84 | 0.19  | 0.27  | 0.36   | 0.50   |
| 0.44 | 25.72    | 59.91    | 121.55   | 280.57    | 0.85 | 0.19  | 0.26  | 0.34   | 0.47   |
| 0.45 | 22.47    | 51.77    | 105.53   | 240.00    | 0.86 | 0.18  | 0.25  | 0.32   | 0.44   |
| 0.46 | 19.67    | 45.42    | 92.40    | 210.21    | 0.87 | 0.17  | 0.24  | 0.31   | 0.42   |
| 0.47 | 17.36    | 39.84    | 81.63    | 185.77    | 0.88 | 0.17  | 0.23  | 0.30   | 0.41   |
| 0.48 | 15.24    | 34.72    | 71.58    | 160.14    | 0.89 | 0.17  | 0.23  | 0.30   | 0.40   |
| 0.49 | 13.26    | 30.17    | 61.09    | 135.30    | 0.90 | 0.17  | 0.22  | 0.29   | 0.40   |
| 0.50 | 11.62    | 26.35    | 52.54    | 114.65    |      |       |       |        |        |

Table S82: Critical values for detector  $\hat{H}_d^m$  and FM-OLS and D-OLS estimation in a model with intercept. The number of integrated regressors is 2 and the highest power of  $x_{kt}$  is 2.

| m    | 90 %     | 95 %      | 97,5 %    | 99 %      | m    | 90 %  | 95 %  | 97,5 % | 99 %   |
|------|----------|-----------|-----------|-----------|------|-------|-------|--------|--------|
| 0.10 | 36366.73 | 100046.53 | 237969.03 | 624407.39 | 0.51 | 26.42 | 67.13 | 145.44 | 350.41 |
| 0.11 | 26224.00 | 72333.09  | 168520.97 | 460662.91 | 0.52 | 23.34 | 58.33 | 125.76 | 303.16 |
| 0.12 | 19218.79 | 53089.58  | 123653.56 | 325505.20 | 0.53 | 20.44 | 49.62 | 110.85 | 262.30 |
| 0.13 | 14329.99 | 39426.71  | 92513.96  | 238338.75 | 0.54 | 17.71 | 43.22 | 95.76  | 228.53 |
| 0.14 | 10905.47 | 29959.21  | 69868.27  | 182171.36 | 0.55 | 15.46 | 37.92 | 83.24  | 195.42 |
| 0.15 | 8450.38  | 23299.88  | 53816.26  | 138189.84 | 0.56 | 13.62 | 33.06 | 71.60  | 170.62 |
| 0.16 | 6699.35  | 18332.39  | 43261.65  | 112133.36 | 0.57 | 11.98 | 29.22 | 63.04  | 147.17 |
| 0.17 | 5293.64  | 14500.65  | 33735.27  | 87899.54  | 0.58 | 10.52 | 25.14 | 54.16  | 130.00 |
| 0.18 | 4192.93  | 11535.78  | 26732.37  | 73140.08  | 0.59 | 9.19  | 21.93 | 46.77  | 113.92 |
| 0.19 | 3411.30  | 9281.47   | 21334.15  | 57626.46  | 0.60 | 8.09  | 19.00 | 40.14  | 98.42  |
| 0.20 | 2796.01  | 7690.10   | 17615.56  | 46739.20  | 0.61 | 6.99  | 16.42 | 34.72  | 84.05  |
| 0.21 | 2296.85  | 6276.40   | 14635.49  | 38133.91  | 0.62 | 6.10  | 14.24 | 30.24  | 71.04  |
| 0.22 | 1878.79  | 5206.84   | 12213.41  | 29925.84  | 0.63 | 5.33  | 12.45 | 26.23  | 61.48  |
| 0.23 | 1589.58  | 4183.97   | 9866.64   | 25287.71  | 0.64 | 4.67  | 10.73 | 22.71  | 51.77  |
| 0.24 | 1315.42  | 3483.02   | 8049.44   | 21570.03  | 0.65 | 4.07  | 9.17  | 19.21  | 43.45  |
| 0.25 | 1101.21  | 2976.20   | 6761.11   | 17531.67  | 0.66 | 3.56  | 7.88  | 16.35  | 36.59  |
| 0.26 | 926.40   | 2498.78   | 5848.16   | 14609.62  | 0.67 | 3.06  | 6.81  | 13.82  | 31.42  |
| 0.27 | 789.02   | 2119.25   | 4921.30   | 12302.08  | 0.68 | 2.66  | 5.83  | 11.83  | 26.97  |
| 0.28 | 671.21   | 1812.61   | 4213.52   | 10489.15  | 0.69 | 2.32  | 5.02  | 10.06  | 23.01  |
| 0.29 | 571.57   | 1559.89   | 3575.10   | 9080.36   | 0.70 | 2.02  | 4.33  | 8.50   | 19.86  |
| 0.30 | 490.20   | 1326.93   | 3035.18   | 7767.78   | 0.71 | 1.74  | 3.71  | 7.35   | 15.92  |
| 0.31 | 415.40   | 1131.94   | 2606.14   | 6501.96   | 0.72 | 1.50  | 3.17  | 6.24   | 13.56  |
| 0.32 | 359.37   | 963.63    | 2217.10   | 5576.19   | 0.73 | 1.29  | 2.70  | 5.20   | 11.32  |
| 0.33 | 306.60   | 820.02    | 1852.75   | 4793.18   | 0.74 | 1.09  | 2.29  | 4.47   | 9.52   |
| 0.34 | 265.69   | 697.83    | 1572.37   | 4064.38   | 0.75 | 0.94  | 1.94  | 3.79   | 8.12   |
| 0.35 | 227.99   | 611.57    | 1351.03   | 3359.80   | 0.76 | 0.80  | 1.66  | 3.16   | 6.77   |
| 0.36 | 195.94   | 540.48    | 1203.11   | 2957.41   | 0.77 | 0.68  | 1.40  | 2.66   | 5.67   |
| 0.37 | 171.19   | 456.11    | 1044.96   | 2635.79   | 0.78 | 0.57  | 1.16  | 2.21   | 4.73   |
| 0.38 | 148.44   | 392.14    | 904.32    | 2276.78   | 0.79 | 0.49  | 0.98  | 1.84   | 3.83   |
| 0.39 | 130.25   | 341.29    | 792.45    | 1958.51   | 0.80 | 0.41  | 0.80  | 1.52   | 3.07   |
| 0.40 | 114.12   | 298.96    | 692.40    | 1698.09   | 0.81 | 0.34  | 0.66  | 1.23   | 2.47   |
| 0.41 | 100.38   | 258.57    | 594.85    | 1512.81   | 0.82 | 0.28  | 0.54  | 0.98   | 2.02   |
| 0.42 | 88.00    | 226.87    | 520.22    | 1268.41   | 0.83 | 0.23  | 0.44  | 0.78   | 1.60   |
| 0.43 | 76.49    | 196.71    | 457.98    | 1123.41   | 0.84 | 0.19  | 0.36  | 0.62   | 1.25   |
| 0.44 | 66.45    | 171.71    | 390.33    | 1011.91   | 0.85 | 0.15  | 0.29  | 0.49   | 0.99   |
| 0.45 | 58.36    | 149.86    | 338.06    | 850.14    | 0.86 | 0.12  | 0.23  | 0.39   | 0.76   |
| 0.46 | 50.86    | 129.50    | 291.35    | 718.51    | 0.87 | 0.10  | 0.18  | 0.30   | 0.58   |
| 0.47 | 44.30    | 113.48    | 251.86    | 602.63    | 0.88 | 0.08  | 0.14  | 0.23   | 0.44   |
| 0.48 | 38.85    | 99.12     | 219.67    | 530.69    | 0.89 | 0.07  | 0.11  | 0.17   | 0.33   |
| 0.49 | 34.26    | 86.28     | 191.49    | 469.45    | 0.90 | 0.06  | 0.09  | 0.13   | 0.24   |
| 0.50 | 29.93    | 76.09     | 166.61    | 403.92    |      |       |       |        |        |

Table S83: Critical values for detector  $\hat{H}_d^m$  and IM-OLS estimation in a model with intercept. The number of integrated regressors is 2 and the highest power of  $x_{kt}$  is 2.

| m    | 90 %     | 95 %     | 97,5 %    | 99 %      | m    | 90 %  | 95 %  | 97,5 % | 99 %   |
|------|----------|----------|-----------|-----------|------|-------|-------|--------|--------|
| 0.10 | 26903.37 | 56545.77 | 112284.53 | 249096.37 | 0.51 | 16.51 | 31.22 | 56.14  | 111.98 |
| 0.11 | 18979.87 | 39974.59 | 78797.77  | 179191.54 | 0.52 | 14.54 | 27.09 | 48.81  | 96.97  |
| 0.12 | 13722.53 | 28629.79 | 57376.96  | 125828.41 | 0.53 | 12.62 | 23.49 | 42.03  | 83.53  |
| 0.13 | 10051.32 | 20756.40 | 40414.24  | 92514.94  | 0.54 | 11.16 | 20.57 | 36.61  | 75.06  |
| 0.14 | 7752.31  | 15769.35 | 31027.19  | 70055.54  | 0.55 | 9.71  | 17.88 | 31.92  | 64.62  |
| 0.15 | 5937.60  | 12058.85 | 23734.96  | 53145.23  | 0.56 | 8.50  | 15.56 | 27.69  | 56.00  |
| 0.16 | 4586.21  | 9369.47  | 18384.00  | 41923.79  | 0.57 | 7.49  | 13.75 | 23.99  | 47.90  |
| 0.17 | 3591.47  | 7348.22  | 14494.90  | 33551.77  | 0.58 | 6.55  | 12.04 | 20.60  | 41.93  |
| 0.18 | 2887.48  | 5805.23  | 11326.54  | 26634.52  | 0.59 | 5.69  | 10.41 | 18.02  | 36.00  |
| 0.19 | 2305.56  | 4649.25  | 8929.84   | 20684.97  | 0.60 | 5.02  | 8.98  | 15.69  | 30.78  |
| 0.20 | 1855.90  | 3770.26  | 7373.91   | 16812.51  | 0.61 | 4.40  | 8.01  | 13.64  | 26.99  |
| 0.21 | 1523.34  | 3047.43  | 5928.49   | 13571.79  | 0.62 | 3.85  | 6.88  | 11.89  | 23.47  |
| 0.22 | 1246.97  | 2490.53  | 4868.78   | 10943.56  | 0.63 | 3.36  | 6.02  | 10.37  | 20.64  |
| 0.23 | 1035.15  | 2080.53  | 4019.30   | 8749.63   | 0.64 | 2.93  | 5.20  | 8.99   | 17.62  |
| 0.24 | 863.26   | 1741.80  | 3301.61   | 7312.40   | 0.65 | 2.56  | 4.50  | 7.69   | 14.82  |
| 0.25 | 719.09   | 1441.59  | 2762.61   | 6041.96   | 0.66 | 2.22  | 3.85  | 6.54   | 12.34  |
| 0.26 | 600.96   | 1214.70  | 2364.77   | 5023.22   | 0.67 | 1.91  | 3.37  | 5.62   | 10.87  |
| 0.27 | 510.28   | 1040.04  | 1972.18   | 4356.12   | 0.68 | 1.66  | 2.90  | 4.82   | 9.30   |
| 0.28 | 430.02   | 881.35   | 1678.84   | 3666.62   | 0.69 | 1.42  | 2.50  | 4.18   | 8.13   |
| 0.29 | 370.32   | 738.43   | 1411.34   | 3033.77   | 0.70 | 1.22  | 2.12  | 3.57   | 6.62   |
| 0.30 | 313.28   | 633.42   | 1197.87   | 2572.20   | 0.71 | 1.06  | 1.81  | 3.02   | 5.69   |
| 0.31 | 270.83   | 534.68   | 1007.88   | 2225.91   | 0.72 | 0.90  | 1.55  | 2.56   | 4.65   |
| 0.32 | 231.86   | 456.19   | 847.45    | 1864.40   | 0.73 | 0.77  | 1.32  | 2.16   | 4.06   |
| 0.33 | 197.14   | 388.71   | 726.48    | 1525.40   | 0.74 | 0.65  | 1.12  | 1.79   | 3.29   |
| 0.34 | 171.79   | 334.20   | 614.07    | 1303.24   | 0.75 | 0.55  | 0.93  | 1.50   | 2.71   |
| 0.35 | 147.04   | 288.63   | 530.48    | 1128.63   | 0.76 | 0.46  | 0.78  | 1.26   | 2.27   |
| 0.36 | 126.64   | 249.48   | 460.51    | 968.76    | 0.77 | 0.39  | 0.65  | 1.05   | 1.90   |
| 0.37 | 110.01   | 215.02   | 406.70    | 847.16    | 0.78 | 0.34  | 0.54  | 0.86   | 1.52   |
| 0.38 | 95.45    | 188.37   | 355.32    | 744.89    | 0.79 | 0.29  | 0.45  | 0.71   | 1.24   |
| 0.39 | 83.07    | 160.90   | 303.24    | 635.05    | 0.80 | 0.24  | 0.37  | 0.57   | 1.00   |
| 0.40 | 72.46    | 140.06   | 263.72    | 549.76    | 0.81 | 0.21  | 0.31  | 0.47   | 0.79   |
| 0.41 | 62.90    | 122.70   | 226.75    | 491.57    | 0.82 | 0.19  | 0.26  | 0.38   | 0.62   |
| 0.42 | 54.96    | 106.41   | 194.52    | 417.96    | 0.83 | 0.17  | 0.23  | 0.31   | 0.49   |
| 0.43 | 48.28    | 93.51    | 169.04    | 367.28    | 0.84 | 0.15  | 0.20  | 0.26   | 0.40   |
| 0.44 | 42.43    | 80.92    | 147.29    | 320.05    | 0.85 | 0.14  | 0.17  | 0.22   | 0.32   |
| 0.45 | 37.15    | 69.98    | 126.36    | 272.32    | 0.86 | 0.13  | 0.16  | 0.20   | 0.27   |
| 0.46 | 32.20    | 61.01    | 111.17    | 234.35    | 0.87 | 0.12  | 0.15  | 0.18   | 0.24   |
| 0.47 | 28.10    | 54.00    | 97.93     | 210.70    | 0.88 | 0.11  | 0.14  | 0.17   | 0.21   |
| 0.48 | 24.67    | 47.12    | 85.72     | 175.91    | 0.89 | 0.10  | 0.13  | 0.16   | 0.20   |
| 0.49 | 21.59    | 40.71    | 73.00     | 152.45    | 0.90 | 0.10  | 0.12  | 0.15   | 0.19   |
| 0.50 | 18.91    | 35.58    | 63.54     | 130.41    |      |       |       |        |        |

Table S84: Critical values for detector  $\hat{H}_d^m$  and FM-OLS and D-OLS estimation in a model with intercept and linear trend. The number of integrated regressors is 2 and the highest power of  $x_{kt}$  is 2.

| m    | 90 %     | 95 %      | 97,5 %    | 99 %      | m    | 90 %  | 95 %  | 97,5 % | 99 %   |
|------|----------|-----------|-----------|-----------|------|-------|-------|--------|--------|
| 0.10 | 63802.12 | 144686.27 | 302256.46 | 713677.78 | 0.51 | 37.26 | 77.06 | 148.13 | 321.28 |
| 0.11 | 44418.88 | 99499.72  | 210877.72 | 502918.32 | 0.52 | 32.77 | 66.56 | 129.37 | 283.70 |
| 0.12 | 31752.62 | 71823.41  | 151329.91 | 363790.37 | 0.53 | 28.70 | 57.71 | 113.53 | 248.64 |
| 0.13 | 23475.56 | 53012.59  | 110543.40 | 261528.75 | 0.54 | 24.82 | 50.49 | 97.56  | 215.94 |
| 0.14 | 17583.32 | 39414.06  | 82163.47  | 193384.86 | 0.55 | 21.87 | 43.73 | 84.81  | 187.12 |
| 0.15 | 13588.47 | 30516.63  | 63195.68  | 151066.07 | 0.56 | 19.11 | 37.78 | 72.23  | 161.23 |
| 0.16 | 10560.82 | 23557.55  | 49746.06  | 117308.52 | 0.57 | 16.74 | 32.90 | 62.85  | 141.55 |
| 0.17 | 8267.48  | 18385.18  | 38933.23  | 94895.91  | 0.58 | 14.47 | 28.92 | 54.53  | 122.45 |
| 0.18 | 6595.57  | 14482.94  | 30624.94  | 75873.60  | 0.59 | 12.71 | 25.24 | 47.20  | 106.92 |
| 0.19 | 5355.09  | 11660.70  | 23853.23  | 60855.23  | 0.60 | 11.14 | 22.04 | 40.84  | 91.76  |
| 0.20 | 4364.29  | 9470.84   | 19600.42  | 49253.06  | 0.61 | 9.69  | 19.41 | 35.82  | 77.66  |
| 0.21 | 3551.04  | 7817.86   | 15905.34  | 39588.84  | 0.62 | 8.51  | 16.69 | 31.07  | 67.45  |
| 0.22 | 2876.42  | 6392.47   | 13156.67  | 31390.28  | 0.63 | 7.41  | 14.49 | 26.84  | 58.47  |
| 0.23 | 2383.86  | 5267.81   | 10782.75  | 24702.14  | 0.64 | 6.47  | 12.56 | 23.22  | 49.99  |
| 0.24 | 1976.16  | 4283.59   | 8992.10   | 21156.95  | 0.65 | 5.64  | 10.71 | 20.10  | 43.48  |
| 0.25 | 1662.64  | 3616.08   | 7367.39   | 17228.11  | 0.66 | 4.90  | 9.31  | 17.00  | 36.76  |
| 0.26 | 1386.73  | 3054.98   | 6263.64   | 14762.99  | 0.67 | 4.22  | 7.97  | 14.67  | 30.76  |
| 0.27 | 1170.55  | 2593.35   | 5281.34   | 12509.16  | 0.68 | 3.64  | 6.83  | 12.34  | 26.28  |
| 0.28 | 985.23   | 2172.81   | 4415.45   | 10552.24  | 0.69 | 3.14  | 5.89  | 10.50  | 22.25  |
| 0.29 | 831.93   | 1816.56   | 3705.52   | 8765.16   | 0.70 | 2.73  | 5.05  | 9.09   | 18.51  |
| 0.30 | 713.08   | 1540.64   | 3106.85   | 7213.30   | 0.71 | 2.35  | 4.34  | 7.75   | 15.60  |
| 0.31 | 606.31   | 1312.92   | 2650.82   | 6107.37   | 0.72 | 2.01  | 3.74  | 6.63   | 13.18  |
| 0.32 | 520.27   | 1104.14   | 2225.10   | 5315.01   | 0.73 | 1.73  | 3.18  | 5.69   | 11.28  |
| 0.33 | 447.05   | 955.32    | 1945.58   | 4511.35   | 0.74 | 1.48  | 2.70  | 4.88   | 9.40   |
| 0.34 | 384.60   | 812.88    | 1653.69   | 3888.00   | 0.75 | 1.26  | 2.29  | 4.08   | 8.11   |
| 0.35 | 332.36   | 707.13    | 1436.25   | 3354.03   | 0.76 | 1.07  | 1.94  | 3.39   | 6.70   |
| 0.36 | 285.33   | 617.45    | 1257.61   | 2910.62   | 0.77 | 0.90  | 1.62  | 2.77   | 5.61   |
| 0.37 | 248.69   | 528.46    | 1085.16   | 2530.80   | 0.78 | 0.76  | 1.36  | 2.32   | 4.63   |
| 0.38 | 216.72   | 457.25    | 929.08    | 2140.55   | 0.79 | 0.64  | 1.13  | 1.92   | 3.72   |
| 0.39 | 187.89   | 393.44    | 818.89    | 1891.89   | 0.80 | 0.53  | 0.93  | 1.57   | 2.96   |
| 0.40 | 164.73   | 345.01    | 712.37    | 1633.11   | 0.81 | 0.44  | 0.77  | 1.27   | 2.37   |
| 0.41 | 143.14   | 302.98    | 610.83    | 1410.43   | 0.82 | 0.36  | 0.63  | 1.02   | 1.91   |
| 0.42 | 124.88   | 258.77    | 525.43    | 1200.93   | 0.83 | 0.30  | 0.51  | 0.82   | 1.51   |
| 0.43 | 108.21   | 222.81    | 453.93    | 1051.31   | 0.84 | 0.24  | 0.41  | 0.66   | 1.22   |
| 0.44 | 94.83    | 198.07    | 391.24    | 893.87    | 0.85 | 0.20  | 0.33  | 0.53   | 0.95   |
| 0.45 | 83.31    | 173.19    | 342.64    | 767.46    | 0.86 | 0.15  | 0.26  | 0.41   | 0.74   |
| 0.46 | 72.66    | 151.22    | 294.70    | 662.51    | 0.87 | 0.12  | 0.20  | 0.32   | 0.57   |
| 0.47 | 63.42    | 131.56    | 255.38    | 571.07    | 0.88 | 0.10  | 0.16  | 0.25   | 0.43   |
| 0.48 | 55.36    | 115.00    | 223.01    | 497.44    | 0.89 | 0.08  | 0.12  | 0.19   | 0.32   |
| 0.49 | 48.49    | 100.51    | 195.84    | 437.61    | 0.90 | 0.06  | 0.09  | 0.14   | 0.23   |
| 0.50 | 42.48    | 88.19     | 171.12    | 380.43    |      |       |       |        |        |

Table S85: Critical values for detector  $\hat{H}_d^m$  and IM-OLS estimation in a model with intercept and linear trend. The number of integrated regressors is 2 and the highest power of  $x_{kt}$  is 2.

| m    | 90 %       | 95 %       | 97,5 %      | 99 %        | m    | 90 %   | 95 %   | 97,5 %  | 99 %    |
|------|------------|------------|-------------|-------------|------|--------|--------|---------|---------|
| 0.10 | 1398233.43 | 5042437.34 | 14602998.13 | 48219721.36 | 0.51 | 103.18 | 360.01 | 1006.04 | 2938.79 |
| 0.11 | 893809.36  | 3172559.68 | 9359110.75  | 30921507.99 | 0.52 | 87.00  | 302.02 | 827.10  | 2499.65 |
| 0.12 | 604036.88  | 2188205.69 | 6228731.09  | 20686075.50 | 0.53 | 71.85  | 250.46 | 680.04  | 2064.56 |
| 0.13 | 413395.34  | 1507470.34 | 4389922.92  | 13892561.28 | 0.54 | 59.88  | 211.74 | 571.41  | 1705.54 |
| 0.14 | 287800.37  | 1063860.68 | 3191735.72  | 9715417.12  | 0.55 | 50.29  | 174.55 | 472.09  | 1422.04 |
| 0.15 | 204302.86  | 778004.80  | 2251393.65  | 7084745.77  | 0.56 | 42.11  | 149.89 | 412.12  | 1175.00 |
| 0.16 | 145419.78  | 545667.94  | 1602710.68  | 5441824.77  | 0.57 | 35.02  | 121.75 | 331.27  | 975.03  |
| 0.17 | 110215.29  | 392724.90  | 1147146.58  | 4029134.75  | 0.58 | 29.27  | 100.23 | 279.76  | 823.15  |
| 0.18 | 81558.89   | 293898.69  | 885306.76   | 3018805.96  | 0.59 | 24.13  | 83.82  | 228.27  | 699.73  |
| 0.19 | 61301.64   | 226527.86  | 659885.38   | 2279744.67  | 0.60 | 20.32  | 69.35  | 191.81  | 595.59  |
| 0.20 | 47277.38   | 175093.32  | 511981.35   | 1775121.72  | 0.61 | 17.41  | 59.21  | 162.04  | 482.69  |
| 0.21 | 36039.20   | 133557.29  | 389798.32   | 1348634.40  | 0.62 | 14.30  | 48.40  | 132.86  | 406.24  |
| 0.22 | 27766.33   | 103236.70  | 301388.03   | 980519.94   | 0.63 | 12.04  | 41.05  | 110.83  | 338.17  |
| 0.23 | 22523.38   | 81909.92   | 237238.74   | 766432.75   | 0.64 | 9.83   | 33.03  | 88.34   | 273.24  |
| 0.24 | 17276.15   | 64751.94   | 189158.25   | 610221.80   | 0.65 | 8.16   | 27.23  | 72.80   | 217.30  |
| 0.25 | 13793.70   | 50348.07   | 145020.52   | 483394.88   | 0.66 | 6.77   | 22.01  | 59.02   | 173.15  |
| 0.26 | 11004.63   | 40777.36   | 118480.47   | 382446.77   | 0.67 | 5.57   | 18.33  | 48.60   | 142.44  |
| 0.27 | 9085.71    | 32530.11   | 95370.25    | 302107.57   | 0.68 | 4.68   | 14.78  | 38.96   | 117.86  |
| 0.28 | 7097.44    | 26798.07   | 75150.15    | 246035.18   | 0.69 | 3.90   | 12.09  | 32.00   | 93.38   |
| 0.29 | 5732.47    | 20955.12   | 60831.28    | 197507.27   | 0.70 | 3.16   | 9.86   | 25.88   | 74.80   |
| 0.30 | 4683.12    | 16813.64   | 48543.70    | 158323.23   | 0.71 | 2.62   | 8.32   | 21.24   | 61.85   |
| 0.31 | 3853.37    | 13911.20   | 40399.96    | 132502.61   | 0.72 | 2.19   | 6.88   | 17.24   | 50.02   |
| 0.32 | 3143.73    | 11245.03   | 33041.63    | 110614.52   | 0.73 | 1.76   | 5.42   | 13.84   | 39.54   |
| 0.33 | 2607.66    | 9233.90    | 26871.61    | 89264.47    | 0.74 | 1.44   | 4.33   | 10.93   | 31.73   |
| 0.34 | 2152.96    | 7494.85    | 22153.17    | 75353.29    | 0.75 | 1.15   | 3.51   | 8.77    | 23.71   |
| 0.35 | 1799.55    | 6289.00    | 18203.77    | 61033.63    | 0.76 | 0.93   | 2.75   | 6.99    | 19.13   |
| 0.36 | 1479.88    | 5203.94    | 14685.14    | 48530.08    | 0.77 | 0.75   | 2.23   | 5.52    | 14.94   |
| 0.37 | 1224.52    | 4288.46    | 12097.04    | 38151.67    | 0.78 | 0.61   | 1.73   | 4.43    | 12.15   |
| 0.38 | 1021.51    | 3590.69    | 10363.70    | 33167.14    | 0.79 | 0.50   | 1.37   | 3.28    | 8.91    |
| 0.39 | 855.85     | 2979.37    | 8582.05     | 26640.75    | 0.80 | 0.41   | 1.04   | 2.56    | 6.70    |
| 0.40 | 709.18     | 2518.83    | 6937.75     | 22464.53    | 0.81 | 0.36   | 0.80   | 1.91    | 5.06    |
| 0.41 | 587.14     | 2100.88    | 5765.21     | 18429.76    | 0.82 | 0.31   | 0.64   | 1.47    | 3.88    |
| 0.42 | 490.58     | 1748.45    | 4806.85     | 15835.88    | 0.83 | 0.27   | 0.51   | 1.09    | 2.80    |
| 0.43 | 410.56     | 1452.36    | 3957.24     | 12995.41    | 0.84 | 0.25   | 0.41   | 0.81    | 2.01    |
| 0.44 | 343.18     | 1204.55    | 3338.48     | 10764.08    | 0.85 | 0.22   | 0.36   | 0.61    | 1.44    |
| 0.45 | 290.29     | 1017.68    | 2824.04     | 9115.79     | 0.86 | 0.21   | 0.32   | 0.50    | 1.02    |
| 0.46 | 246.06     | 855.24     | 2424.48     | 7458.05     | 0.87 | 0.19   | 0.29   | 0.42    | 0.76    |
| 0.47 | 206.72     | 722.13     | 2057.78     | 6486.50     | 0.88 | 0.18   | 0.26   | 0.36    | 0.58    |
| 0.48 | 174.39     | 606.82     | 1725.38     | 5310.51     | 0.89 | 0.17   | 0.24   | 0.33    | 0.49    |
| 0.49 | 143.29     | 494.11     | 1400.30     | 4374.63     | 0.90 | 0.17   | 0.23   | 0.31    | 0.44    |
| 0.50 | 120.10     | 419.13     | 1185.70     | 3560.01     |      |        |        |         |         |

Table S86: Critical values for detector  $\hat{H}_d^m$  and FM-OLS and D-OLS estimation in a model with intercept. The number of integrated regressors is 2 and the highest power of  $x_{kt}$  is 3.

| m    | 90 %       | 95 %        | 97,5 %      | 99 %         | m    | 90 %   | 95 %    | 97,5 %  | 99 %     |
|------|------------|-------------|-------------|--------------|------|--------|---------|---------|----------|
| 0.10 | 5612969.94 | 22493726.64 | 69794426.03 | 255122716.48 | 0.51 | 395.82 | 1566.58 | 4793.59 | 16426.03 |
| 0.11 | 3641270.09 | 14339891.57 | 45820176.52 | 159598562.07 | 0.52 | 334.12 | 1325.09 | 3950.34 | 13448.64 |
| 0.12 | 2445413.57 | 9385777.07  | 29455595.25 | 107420236.75 | 0.53 | 280.92 | 1077.74 | 3256.90 | 11559.65 |
| 0.13 | 1646084.69 | 6352894.66  | 19508647.62 | 73507369.40  | 0.54 | 237.07 | 893.65  | 2735.17 | 9573.52  |
| 0.14 | 1119785.40 | 4484786.26  | 13904629.58 | 51530335.02  | 0.55 | 200.07 | 770.35  | 2297.54 | 8245.76  |
| 0.15 | 799718.96  | 3167349.91  | 10121164.15 | 37154725.43  | 0.56 | 165.96 | 628.36  | 1896.43 | 6701.22  |
| 0.16 | 583293.95  | 2305555.76  | 7232099.28  | 26076933.57  | 0.57 | 138.30 | 530.05  | 1583.53 | 5591.66  |
| 0.17 | 433036.07  | 1684749.80  | 5273780.55  | 19524589.21  | 0.58 | 116.90 | 443.30  | 1315.77 | 4759.02  |
| 0.18 | 325704.11  | 1272121.52  | 4110107.18  | 14765367.44  | 0.59 | 96.45  | 364.70  | 1106.30 | 4018.43  |
| 0.19 | 249404.70  | 981534.01   | 3041411.09  | 11291894.40  | 0.60 | 79.70  | 302.28  | 931.19  | 3194.53  |
| 0.20 | 189718.26  | 763526.63   | 2358215.38  | 8761001.80   | 0.61 | 65.70  | 254.20  | 766.57  | 2587.03  |
| 0.21 | 145905.57  | 572495.22   | 1796262.05  | 6804273.94   | 0.62 | 55.12  | 212.68  | 628.68  | 2103.23  |
| 0.22 | 112893.73  | 446836.72   | 1411355.72  | 5211503.24   | 0.63 | 46.48  | 174.20  | 519.29  | 1713.48  |
| 0.23 | 87032.32   | 345081.46   | 1068845.30  | 4072248.93   | 0.64 | 38.67  | 144.08  | 427.21  | 1429.65  |
| 0.24 | 69003.93   | 273131.20   | 864761.87   | 3145941.82   | 0.65 | 32.00  | 117.84  | 346.61  | 1128.31  |
| 0.25 | 55951.14   | 220279.88   | 701501.87   | 2459257.15   | 0.66 | 26.68  | 95.50   | 280.71  | 929.87   |
| 0.26 | 44367.09   | 177324.17   | 554908.10   | 1982358.49   | 0.67 | 22.02  | 79.61   | 231.02  | 733.69   |
| 0.27 | 35190.40   | 142992.35   | 446025.42   | 1630381.19   | 0.68 | 18.13  | 65.05   | 187.82  | 595.72   |
| 0.28 | 28200.31   | 113895.42   | 352860.07   | 1330536.05   | 0.69 | 14.88  | 52.39   | 153.21  | 490.13   |
| 0.29 | 22527.78   | 91845.41    | 287951.76   | 1063400.30   | 0.70 | 12.00  | 42.34   | 123.64  | 394.19   |
| 0.30 | 18590.07   | 74786.30    | 231986.17   | 862960.54    | 0.71 | 9.83   | 34.64   | 98.23   | 314.65   |
| 0.31 | 15179.05   | 59912.08    | 182498.42   | 701218.82    | 0.72 | 8.13   | 28.16   | 81.89   | 257.46   |
| 0.32 | 12617.59   | 49317.56    | 153180.63   | 576108.78    | 0.73 | 6.60   | 22.89   | 65.19   | 205.90   |
| 0.33 | 10378.74   | 39970.11    | 128873.87   | 466743.15    | 0.74 | 5.37   | 18.38   | 51.49   | 161.76   |
| 0.34 | 8485.49    | 33723.10    | 106032.51   | 391767.92    | 0.75 | 4.35   | 14.70   | 40.66   | 125.90   |
| 0.35 | 7022.97    | 28064.99    | 87175.32    | 315484.35    | 0.76 | 3.47   | 11.72   | 32.57   | 100.07   |
| 0.36 | 5821.90    | 22933.95    | 71400.96    | 247075.68    | 0.77 | 2.77   | 9.18    | 25.44   | 77.64    |
| 0.37 | 4830.85    | 19162.09    | 58623.02    | 196443.13    | 0.78 | 2.22   | 7.23    | 19.79   | 61.30    |
| 0.38 | 4016.89    | 15828.92    | 48720.12    | 160919.12    | 0.79 | 1.75   | 5.69    | 15.32   | 48.32    |
| 0.39 | 3357.56    | 13171.59    | 39716.94    | 134116.36    | 0.80 | 1.37   | 4.45    | 11.98   | 35.11    |
| 0.40 | 2808.97    | 10909.47    | 32449.30    | 111280.79    | 0.81 | 1.06   | 3.43    | 9.09    | 27.40    |
| 0.41 | 2306.34    | 9172.77     | 26866.45    | 93650.94     | 0.82 | 0.83   | 2.63    | 6.85    | 20.61    |
| 0.42 | 1920.12    | 7687.63     | 22713.98    | 79163.05     | 0.83 | 0.65   | 1.98    | 5.18    | 14.93    |
| 0.43 | 1620.88    | 6331.27     | 19204.90    | 67246.42     | 0.84 | 0.50   | 1.46    | 3.72    | 11.05    |
| 0.44 | 1366.36    | 5365.93     | 16259.65    | 56612.51     | 0.85 | 0.38   | 1.10    | 2.76    | 7.87     |
| 0.45 | 1129.92    | 4411.85     | 13568.23    | 47380.41     | 0.86 | 0.28   | 0.80    | 2.02    | 5.63     |
| 0.46 | 945.54     | 3740.44     | 11426.59    | 40599.81     | 0.87 | 0.21   | 0.59    | 1.43    | 3.96     |
| 0.47 | 806.84     | 3132.70     | 9715.53     | 32917.01     | 0.88 | 0.15   | 0.42    | 1.01    | 2.69     |
| 0.48 | 678.82     | 2585.39     | 8089.16     | 27601.64     | 0.89 | 0.11   | 0.29    | 0.69    | 1.85     |
| 0.49 | 564.54     | 2186.70     | 7012.15     | 23134.72     | 0.90 | 0.08   | 0.20    | 0.47    | 1.24     |
| 0.50 | 476.22     | 1842.58     | 5675.78     | 19812.02     |      |        |         |         |          |

Table S87: Critical values for detector  $\hat{H}_d^m$  and IM-OLS estimation in a model with intercept. The number of integrated regressors is 2 and the highest power of  $x_{kt}$  is 3.



| m    | 90 %       | 95 %       | 97,5 %      | 99 %        | m    | 90 %   | 95 %   | 97,5 %  | 99 %    |
|------|------------|------------|-------------|-------------|------|--------|--------|---------|---------|
| 0.10 | 1950654.81 | 6683426.33 | 18528246.21 | 57174517.12 | 0.51 | 110.60 | 376.44 | 1068.35 | 3055.56 |
| 0.11 | 1228877.83 | 4086302.30 | 11718081.36 | 36466992.50 | 0.52 | 94.19  | 317.40 | 884.47  | 2555.94 |
| 0.12 | 805225.72  | 2778401.89 | 7781562.10  | 23690258.31 | 0.53 | 78.05  | 261.51 | 714.23  | 2184.30 |
| 0.13 | 541279.94  | 1853671.26 | 5444943.12  | 16303377.95 | 0.54 | 65.10  | 222.15 | 601.69  | 1798.57 |
| 0.14 | 377083.28  | 1316099.30 | 3707021.65  | 11359247.58 | 0.55 | 54.47  | 184.78 | 494.48  | 1484.44 |
| 0.15 | 262590.71  | 936129.88  | 2659345.84  | 8288737.89  | 0.56 | 46.31  | 158.23 | 431.63  | 1226.57 |
| 0.16 | 187744.69  | 656939.14  | 1848124.34  | 6147806.77  | 0.57 | 38.60  | 128.98 | 344.47  | 1022.84 |
| 0.17 | 136635.23  | 465776.48  | 1316093.15  | 4327651.53  | 0.58 | 32.09  | 107.07 | 291.67  | 863.77  |
| 0.18 | 101962.78  | 350773.10  | 1006525.81  | 3230026.37  | 0.59 | 26.37  | 87.85  | 240.22  | 716.59  |
| 0.19 | 76184.61   | 267258.55  | 738824.24   | 2455151.12  | 0.60 | 22.37  | 74.52  | 204.36  | 620.25  |
| 0.20 | 57622.60   | 204571.40  | 563749.39   | 1827412.12  | 0.61 | 19.02  | 61.66  | 168.08  | 524.63  |
| 0.21 | 44313.84   | 153563.47  | 431168.67   | 1381783.91  | 0.62 | 15.82  | 51.20  | 137.27  | 424.50  |
| 0.22 | 33118.54   | 118882.13  | 331973.16   | 1064401.94  | 0.63 | 13.50  | 43.83  | 116.18  | 356.91  |
| 0.23 | 26818.19   | 92087.62   | 260997.95   | 817373.75   | 0.64 | 11.05  | 34.67  | 92.62   | 292.89  |
| 0.24 | 20572.96   | 73179.74   | 205554.34   | 661087.16   | 0.65 | 9.16   | 28.02  | 75.96   | 232.13  |
| 0.25 | 16303.30   | 56861.37   | 163031.53   | 524884.90   | 0.66 | 7.57   | 23.37  | 61.71   | 186.90  |
| 0.26 | 12842.30   | 46423.90   | 127207.76   | 414023.85   | 0.67 | 6.32   | 19.21  | 50.55   | 149.20  |
| 0.27 | 10413.60   | 36786.60   | 103540.86   | 333975.13   | 0.68 | 5.27   | 15.51  | 40.76   | 124.92  |
| 0.28 | 8218.48    | 29334.39   | 81435.82    | 263335.68   | 0.69 | 4.48   | 12.80  | 33.32   | 99.45   |
| 0.29 | 6574.82    | 23534.57   | 65338.84    | 207191.19   | 0.70 | 3.66   | 10.38  | 27.05   | 77.50   |
| 0.30 | 5368.87    | 18679.55   | 52737.78    | 168489.38   | 0.71 | 3.03   | 8.75   | 22.36   | 65.16   |
| 0.31 | 4362.53    | 15122.78   | 43210.71    | 139044.39   | 0.72 | 2.57   | 7.30   | 18.31   | 51.53   |
| 0.32 | 3511.11    | 12269.59   | 35098.43    | 113536.59   | 0.73 | 2.07   | 5.83   | 14.56   | 40.14   |
| 0.33 | 2926.29    | 10263.09   | 29121.58    | 94678.74    | 0.74 | 1.69   | 4.61   | 11.42   | 31.73   |
| 0.34 | 2406.03    | 8205.63    | 23850.47    | 78044.81    | 0.75 | 1.39   | 3.76   | 9.13    | 24.42   |
| 0.35 | 2000.83    | 6854.75    | 19235.51    | 63533.91    | 0.76 | 1.12   | 3.02   | 7.42    | 20.02   |
| 0.36 | 1641.55    | 5643.63    | 15799.32    | 51899.41    | 0.77 | 0.91   | 2.43   | 5.83    | 15.98   |
| 0.37 | 1356.37    | 4659.76    | 12623.33    | 40334.66    | 0.78 | 0.73   | 1.86   | 4.70    | 12.54   |
| 0.38 | 1123.78    | 3864.12    | 10704.72    | 35183.55    | 0.79 | 0.58   | 1.49   | 3.45    | 9.35    |
| 0.39 | 938.78     | 3212.81    | 8979.95     | 27771.28    | 0.80 | 0.46   | 1.16   | 2.72    | 6.97    |
| 0.40 | 774.58     | 2683.98    | 7405.71     | 23657.40    | 0.81 | 0.37   | 0.87   | 2.03    | 5.46    |
| 0.41 | 648.59     | 2225.78    | 6300.95     | 19371.13    | 0.82 | 0.30   | 0.68   | 1.58    | 4.14    |
| 0.42 | 541.23     | 1859.19    | 5096.45     | 16508.90    | 0.83 | 0.24   | 0.51   | 1.18    | 2.92    |
| 0.43 | 456.03     | 1585.67    | 4246.82     | 13474.41    | 0.84 | 0.20   | 0.38   | 0.87    | 2.14    |
| 0.44 | 377.22     | 1295.23    | 3576.47     | 11080.94    | 0.85 | 0.17   | 0.29   | 0.61    | 1.55    |
| 0.45 | 314.31     | 1087.01    | 3090.96     | 9381.71     | 0.86 | 0.15   | 0.23   | 0.44    | 1.09    |
| 0.46 | 267.10     | 910.98     | 2513.34     | 7743.91     | 0.87 | 0.13   | 0.19   | 0.32    | 0.77    |
| 0.47 | 223.59     | 765.57     | 2149.26     | 6832.92     | 0.88 | 0.12   | 0.16   | 0.24    | 0.51    |
| 0.48 | 189.12     | 647.66     | 1809.25     | 5633.12     | 0.89 | 0.11   | 0.14   | 0.20    | 0.35    |
| 0.49 | 155.67     | 522.16     | 1478.97     | 4582.91     | 0.90 | 0.10   | 0.13   | 0.17    | 0.25    |
| 0.50 | 130.93     | 448.30     | 1244.42     | 3740.38     |      |        |        |         |         |

Table S88: Critical values for detector  $\hat{H}_d^m$  and FM-OLS and D-OLS estimation in a model with intercept and linear trend. The number of integrated regressors is 2 and the highest power of  $x_{kt}$  is 3.

| m    | 90 %       | 95 %        | 97,5 %      | 99 %         | m    | 90 %   | 95 %    | 97,5 %  | 99 %     |
|------|------------|-------------|-------------|--------------|------|--------|---------|---------|----------|
| 0.10 | 6807543.33 | 24663236.66 | 74099964.94 | 256313140.58 | 0.51 | 368.56 | 1407.58 | 4240.97 | 13848.28 |
| 0.11 | 4348340.14 | 15868245.77 | 46812687.99 | 165676100.62 | 0.52 | 303.64 | 1162.72 | 3363.24 | 11443.86 |
| 0.12 | 2834892.99 | 10498042.45 | 31043883.28 | 103015813.40 | 0.53 | 255.02 | 968.69  | 2844.66 | 9569.86  |
| 0.13 | 1903076.74 | 6941148.18  | 21453860.64 | 75798149.96  | 0.54 | 214.00 | 815.09  | 2406.82 | 8214.35  |
| 0.14 | 1284005.88 | 4730293.73  | 14317608.09 | 53514005.91  | 0.55 | 181.85 | 677.16  | 1988.69 | 6856.36  |
| 0.15 | 890561.75  | 3316925.57  | 10237675.33 | 36487172.52  | 0.56 | 153.21 | 574.06  | 1695.95 | 5554.05  |
| 0.16 | 652044.65  | 2403591.04  | 7306377.34  | 25639017.72  | 0.57 | 128.12 | 475.50  | 1392.57 | 4577.38  |
| 0.17 | 466837.01  | 1738263.15  | 5108584.25  | 18355946.51  | 0.58 | 107.20 | 393.32  | 1149.79 | 3943.35  |
| 0.18 | 347411.94  | 1302421.32  | 3864699.48  | 13471785.79  | 0.59 | 90.35  | 326.24  | 963.88  | 3237.16  |
| 0.19 | 257428.13  | 958935.70   | 2872834.06  | 10481014.93  | 0.60 | 74.78  | 273.52  | 803.08  | 2629.71  |
| 0.20 | 194798.25  | 753077.17   | 2270147.98  | 8010135.01   | 0.61 | 61.90  | 226.11  | 673.03  | 2130.03  |
| 0.21 | 148651.39  | 572984.30   | 1701620.80  | 6210437.83   | 0.62 | 51.83  | 189.65  | 549.72  | 1790.40  |
| 0.22 | 114846.62  | 437206.11   | 1332002.29  | 4680633.22   | 0.63 | 43.43  | 160.55  | 458.86  | 1507.92  |
| 0.23 | 89268.28   | 339252.47   | 1048759.10  | 3581999.88   | 0.64 | 36.05  | 132.11  | 373.10  | 1234.31  |
| 0.24 | 70912.97   | 274599.94   | 829135.33   | 2892582.78   | 0.65 | 30.09  | 108.07  | 304.48  | 987.72   |
| 0.25 | 55993.58   | 217655.75   | 664566.48   | 2242642.06   | 0.66 | 24.72  | 86.42   | 253.99  | 788.17   |
| 0.26 | 44607.69   | 172735.90   | 510581.24   | 1813832.94   | 0.67 | 20.32  | 70.62   | 206.72  | 636.33   |
| 0.27 | 35173.21   | 138594.23   | 429700.35   | 1495169.63   | 0.68 | 16.85  | 57.89   | 166.83  | 514.62   |
| 0.28 | 28271.61   | 111208.43   | 341426.27   | 1182678.62   | 0.69 | 14.03  | 46.83   | 138.82  | 424.43   |
| 0.29 | 22479.86   | 88198.92    | 268542.07   | 951447.22    | 0.70 | 11.55  | 37.71   | 112.78  | 346.62   |
| 0.30 | 18519.53   | 69195.11    | 212444.56   | 738362.60    | 0.71 | 9.46   | 31.21   | 90.57   | 279.27   |
| 0.31 | 15048.76   | 56011.09    | 168697.96   | 593902.68    | 0.72 | 7.86   | 25.62   | 73.48   | 226.40   |
| 0.32 | 12385.96   | 45672.51    | 137929.71   | 502533.49    | 0.73 | 6.52   | 21.10   | 59.13   | 176.62   |
| 0.33 | 10032.99   | 37337.25    | 114625.93   | 398185.32    | 0.74 | 5.28   | 17.03   | 46.36   | 140.00   |
| 0.34 | 8269.30    | 31162.94    | 98203.91    | 329553.75    | 0.75 | 4.24   | 13.60   | 36.30   | 111.13   |
| 0.35 | 6828.21    | 25553.72    | 80342.89    | 269832.69    | 0.76 | 3.43   | 10.67   | 28.18   | 87.47    |
| 0.36 | 5624.57    | 20760.12    | 64322.88    | 215009.30    | 0.77 | 2.73   | 8.44    | 22.46   | 67.92    |
| 0.37 | 4664.45    | 17202.26    | 51304.75    | 181577.52    | 0.78 | 2.19   | 6.78    | 17.64   | 52.57    |
| 0.38 | 3902.12    | 14419.34    | 42629.14    | 152031.76    | 0.79 | 1.75   | 5.29    | 13.80   | 40.64    |
| 0.39 | 3194.92    | 12135.69    | 35914.31    | 125197.20    | 0.80 | 1.37   | 4.13    | 10.61   | 31.29    |
| 0.40 | 2655.59    | 10130.19    | 30021.61    | 104355.77    | 0.81 | 1.09   | 3.19    | 8.11    | 23.99    |
| 0.41 | 2193.67    | 8293.03     | 25210.12    | 88380.73     | 0.82 | 0.86   | 2.44    | 6.43    | 18.35    |
| 0.42 | 1816.20    | 6761.63     | 20735.85    | 72560.07     | 0.83 | 0.67   | 1.85    | 4.73    | 13.49    |
| 0.43 | 1509.29    | 5610.64     | 17019.85    | 60444.75     | 0.84 | 0.52   | 1.37    | 3.41    | 9.48     |
| 0.44 | 1277.78    | 4794.78     | 14494.10    | 49569.42     | 0.85 | 0.40   | 1.01    | 2.47    | 6.90     |
| 0.45 | 1079.17    | 4011.44     | 12048.15    | 41079.42     | 0.86 | 0.30   | 0.74    | 1.73    | 4.88     |
| 0.46 | 901.20     | 3375.75     | 9933.10     | 34488.33     | 0.87 | 0.23   | 0.54    | 1.24    | 3.44     |
| 0.47 | 748.41     | 2787.23     | 8362.66     | 28660.56     | 0.88 | 0.17   | 0.39    | 0.89    | 2.36     |
| 0.48 | 629.81     | 2362.52     | 7266.01     | 23501.70     | 0.89 | 0.12   | 0.27    | 0.61    | 1.60     |
| 0.49 | 526.75     | 1973.05     | 6015.82     | 19696.84     | 0.90 | 0.09   | 0.19    | 0.41    | 1.05     |
| 0.50 | 439.79     | 1663.65     | 5007.02     | 16759.44     |      |        |         |         |          |

Table S89: Critical values for detector  $\hat{H}_d^m$  and IM-OLS estimation in a model with intercept and linear trend. The number of integrated regressors is 2 and the highest power of  $x_{kt}$  is 3.

### 2.3 Number of I(1) regressors: 3

| m    | 90 %   | 95 %    | 97,5 %  | 99 %    | m    | 90 % | 95 % | 97,5 % | 99 %  |
|------|--------|---------|---------|---------|------|------|------|--------|-------|
| 0.10 | 814.17 | 1362.18 | 2090.96 | 3450.80 | 0.51 | 4.20 | 6.76 | 10.07  | 15.83 |
| 0.11 | 648.19 | 1078.73 | 1666.78 | 2689.66 | 0.52 | 3.78 | 6.11 | 9.02   | 13.97 |
| 0.12 | 526.16 | 881.17  | 1340.44 | 2142.93 | 0.53 | 3.40 | 5.48 | 8.17   | 12.64 |
| 0.13 | 430.43 | 724.00  | 1110.13 | 1782.80 | 0.54 | 3.06 | 4.94 | 7.38   | 11.36 |
| 0.14 | 359.47 | 599.35  | 924.13  | 1481.85 | 0.55 | 2.77 | 4.49 | 6.68   | 10.18 |
| 0.15 | 298.61 | 503.42  | 767.09  | 1229.99 | 0.56 | 2.52 | 4.00 | 5.95   | 9.09  |
| 0.16 | 252.70 | 427.30  | 658.95  | 1042.00 | 0.57 | 2.25 | 3.62 | 5.35   | 8.22  |
| 0.17 | 212.70 | 360.06  | 554.95  | 885.09  | 0.58 | 2.03 | 3.24 | 4.77   | 7.29  |
| 0.18 | 181.64 | 309.57  | 474.92  | 764.07  | 0.59 | 1.84 | 2.91 | 4.28   | 6.57  |
| 0.19 | 155.87 | 265.65  | 399.86  | 649.55  | 0.60 | 1.64 | 2.62 | 3.85   | 5.81  |
| 0.20 | 134.22 | 227.02  | 347.46  | 559.50  | 0.61 | 1.47 | 2.34 | 3.41   | 5.22  |
| 0.21 | 117.28 | 197.15  | 301.86  | 482.19  | 0.62 | 1.32 | 2.10 | 3.04   | 4.67  |
| 0.22 | 102.69 | 170.64  | 263.79  | 413.52  | 0.63 | 1.18 | 1.87 | 2.71   | 4.06  |
| 0.23 | 89.92  | 149.45  | 229.99  | 370.06  | 0.64 | 1.05 | 1.65 | 2.41   | 3.65  |
| 0.24 | 78.87  | 130.92  | 201.00  | 322.80  | 0.65 | 0.93 | 1.49 | 2.13   | 3.24  |
| 0.25 | 69.60  | 114.94  | 176.92  | 280.45  | 0.66 | 0.83 | 1.30 | 1.90   | 2.85  |
| 0.26 | 61.07  | 102.40  | 156.00  | 248.66  | 0.67 | 0.73 | 1.15 | 1.68   | 2.51  |
| 0.27 | 54.43  | 91.11   | 138.95  | 220.26  | 0.68 | 0.65 | 1.02 | 1.47   | 2.21  |
| 0.28 | 47.93  | 81.02   | 123.65  | 194.91  | 0.69 | 0.58 | 0.89 | 1.30   | 1.95  |
| 0.29 | 43.02  | 71.47   | 108.03  | 172.55  | 0.70 | 0.52 | 0.79 | 1.15   | 1.72  |
| 0.30 | 38.10  | 63.69   | 97.32   | 153.58  | 0.71 | 0.46 | 0.70 | 1.00   | 1.51  |
| 0.31 | 33.91  | 57.25   | 86.92   | 135.42  | 0.72 | 0.41 | 0.62 | 0.87   | 1.30  |
| 0.32 | 30.62  | 51.23   | 77.48   | 122.11  | 0.73 | 0.36 | 0.54 | 0.76   | 1.12  |
| 0.33 | 27.37  | 45.55   | 69.35   | 108.47  | 0.74 | 0.32 | 0.48 | 0.67   | 0.97  |
| 0.34 | 24.58  | 40.97   | 62.27   | 97.80   | 0.75 | 0.29 | 0.42 | 0.58   | 0.84  |
| 0.35 | 22.18  | 36.87   | 55.68   | 89.29   | 0.76 | 0.26 | 0.37 | 0.51   | 0.73  |
| 0.36 | 20.09  | 33.25   | 50.12   | 80.23   | 0.77 | 0.24 | 0.34 | 0.45   | 0.63  |
| 0.37 | 18.02  | 29.89   | 45.23   | 72.43   | 0.78 | 0.22 | 0.30 | 0.40   | 0.56  |
| 0.38 | 16.19  | 26.93   | 40.57   | 64.20   | 0.79 | 0.20 | 0.27 | 0.36   | 0.49  |
| 0.39 | 14.67  | 24.10   | 36.31   | 57.24   | 0.80 | 0.19 | 0.25 | 0.32   | 0.44  |
| 0.40 | 13.11  | 21.84   | 32.59   | 51.54   | 0.81 | 0.17 | 0.23 | 0.30   | 0.40  |
| 0.41 | 11.87  | 19.50   | 29.27   | 45.96   | 0.82 | 0.17 | 0.22 | 0.28   | 0.37  |
| 0.42 | 10.73  | 17.62   | 26.31   | 41.30   | 0.83 | 0.16 | 0.21 | 0.26   | 0.35  |
| 0.43 | 9.65   | 15.65   | 23.61   | 36.90   | 0.84 | 0.15 | 0.20 | 0.25   | 0.34  |
| 0.44 | 8.68   | 14.23   | 21.23   | 33.18   | 0.85 | 0.15 | 0.19 | 0.25   | 0.33  |
| 0.45 | 7.79   | 12.88   | 19.36   | 29.51   | 0.86 | 0.14 | 0.19 | 0.24   | 0.32  |
| 0.46 | 7.08   | 11.68   | 17.24   | 26.52   | 0.87 | 0.14 | 0.18 | 0.24   | 0.32  |
| 0.47 | 6.34   | 10.37   | 15.42   | 23.90   | 0.88 | 0.14 | 0.18 | 0.24   | 0.31  |
| 0.48 | 5.75   | 9.40    | 13.75   | 21.46   | 0.89 | 0.14 | 0.18 | 0.23   | 0.31  |
| 0.49 | 5.19   | 8.47    | 12.62   | 19.69   | 0.90 | 0.13 | 0.18 | 0.23   | 0.31  |
| 0.50 | 4.67   | 7.58    | 11.29   | 17.52   |      |      |      |        |       |

Table S90: Critical values for detector  $\hat{H}_d^n$  and FM-OLS and D-OLS estimation in a model with intercept. The number of integrated regressors is 3 and the highest power of  $x_{kt}$  is 1.

| m    | 90 %    | 95 %    | 97,5 %  | 99 %    | m    | 90 % | 95 %  | 97,5 % | 99 %  |
|------|---------|---------|---------|---------|------|------|-------|--------|-------|
| 0.10 | 1644.53 | 2883.27 | 4624.28 | 7738.50 | 0.51 | 8.54 | 14.35 | 22.13  | 36.23 |
| 0.11 | 1319.36 | 2298.66 | 3657.46 | 6232.43 | 0.52 | 7.68 | 12.94 | 20.21  | 32.36 |
| 0.12 | 1059.52 | 1857.52 | 2967.86 | 5063.50 | 0.53 | 6.92 | 11.64 | 17.98  | 29.14 |
| 0.13 | 868.75  | 1516.53 | 2435.32 | 4106.94 | 0.54 | 6.19 | 10.45 | 16.24  | 26.25 |
| 0.14 | 723.53  | 1254.99 | 2017.31 | 3450.65 | 0.55 | 5.60 | 9.42  | 14.60  | 23.53 |
| 0.15 | 605.76  | 1060.82 | 1717.76 | 2901.36 | 0.56 | 5.06 | 8.46  | 13.03  | 21.19 |
| 0.16 | 511.91  | 881.26  | 1430.21 | 2439.29 | 0.57 | 4.56 | 7.59  | 11.69  | 18.86 |
| 0.17 | 429.05  | 759.95  | 1209.15 | 2063.02 | 0.58 | 4.10 | 6.84  | 10.44  | 16.81 |
| 0.18 | 368.13  | 643.65  | 1035.71 | 1783.69 | 0.59 | 3.68 | 6.16  | 9.30   | 14.95 |
| 0.19 | 317.19  | 550.35  | 883.56  | 1502.65 | 0.60 | 3.32 | 5.49  | 8.34   | 13.20 |
| 0.20 | 273.87  | 471.58  | 744.99  | 1241.75 | 0.61 | 2.98 | 4.89  | 7.43   | 11.85 |
| 0.21 | 236.51  | 412.73  | 644.44  | 1089.16 | 0.62 | 2.67 | 4.39  | 6.70   | 10.67 |
| 0.22 | 207.06  | 361.47  | 559.48  | 946.64  | 0.63 | 2.41 | 3.95  | 5.96   | 9.50  |
| 0.23 | 181.53  | 313.05  | 493.61  | 833.60  | 0.64 | 2.15 | 3.54  | 5.34   | 8.48  |
| 0.24 | 159.12  | 273.49  | 436.08  | 725.68  | 0.65 | 1.92 | 3.16  | 4.78   | 7.55  |
| 0.25 | 139.53  | 241.87  | 384.77  | 635.31  | 0.66 | 1.71 | 2.82  | 4.22   | 6.70  |
| 0.26 | 122.98  | 213.71  | 339.82  | 557.87  | 0.67 | 1.53 | 2.51  | 3.72   | 5.90  |
| 0.27 | 108.94  | 189.58  | 297.20  | 498.77  | 0.68 | 1.36 | 2.21  | 3.29   | 5.22  |
| 0.28 | 97.17   | 167.62  | 263.81  | 441.68  | 0.69 | 1.21 | 1.94  | 2.91   | 4.62  |
| 0.29 | 86.58   | 149.88  | 234.03  | 389.82  | 0.70 | 1.07 | 1.73  | 2.57   | 4.06  |
| 0.30 | 76.96   | 132.85  | 207.83  | 347.70  | 0.71 | 0.94 | 1.52  | 2.29   | 3.57  |
| 0.31 | 68.73   | 118.52  | 186.39  | 306.55  | 0.72 | 0.83 | 1.34  | 2.01   | 3.12  |
| 0.32 | 61.67   | 106.81  | 166.24  | 273.86  | 0.73 | 0.74 | 1.19  | 1.76   | 2.71  |
| 0.33 | 55.45   | 95.29   | 148.26  | 246.61  | 0.74 | 0.65 | 1.04  | 1.55   | 2.38  |
| 0.34 | 49.83   | 84.78   | 132.77  | 221.71  | 0.75 | 0.57 | 0.91  | 1.35   | 2.07  |
| 0.35 | 44.69   | 76.68   | 120.27  | 201.05  | 0.76 | 0.50 | 0.79  | 1.17   | 1.78  |
| 0.36 | 40.11   | 68.69   | 107.01  | 177.18  | 0.77 | 0.43 | 0.68  | 1.01   | 1.53  |
| 0.37 | 36.22   | 61.55   | 96.35   | 163.59  | 0.78 | 0.37 | 0.59  | 0.87   | 1.33  |
| 0.38 | 32.66   | 55.51   | 87.73   | 146.63  | 0.79 | 0.32 | 0.51  | 0.74   | 1.13  |
| 0.39 | 29.31   | 49.96   | 77.94   | 130.42  | 0.80 | 0.28 | 0.44  | 0.63   | 0.95  |
| 0.40 | 26.31   | 45.19   | 70.00   | 118.26  | 0.81 | 0.24 | 0.37  | 0.53   | 0.80  |
| 0.41 | 23.96   | 40.81   | 63.39   | 104.84  | 0.82 | 0.20 | 0.31  | 0.45   | 0.68  |
| 0.42 | 21.63   | 36.78   | 57.20   | 94.92   | 0.83 | 0.17 | 0.26  | 0.38   | 0.57  |
| 0.43 | 19.39   | 33.39   | 51.17   | 83.75   | 0.84 | 0.14 | 0.22  | 0.31   | 0.47  |
| 0.44 | 17.47   | 30.05   | 46.29   | 76.74   | 0.85 | 0.11 | 0.18  | 0.26   | 0.38  |
| 0.45 | 15.86   | 27.01   | 42.04   | 69.22   | 0.86 | 0.09 | 0.15  | 0.21   | 0.31  |
| 0.46 | 14.23   | 24.31   | 38.04   | 62.11   | 0.87 | 0.08 | 0.12  | 0.17   | 0.25  |
| 0.47 | 12.87   | 21.89   | 33.81   | 56.16   | 0.88 | 0.06 | 0.09  | 0.13   | 0.20  |
| 0.48 | 11.55   | 19.70   | 30.58   | 49.93   | 0.89 | 0.05 | 0.08  | 0.11   | 0.16  |
| 0.49 | 10.44   | 17.81   | 27.47   | 45.12   | 0.90 | 0.05 | 0.06  | 0.08   | 0.12  |
| 0.50 | 9.49    | 16.03   | 24.68   | 40.33   |      |      |       |        |       |

Table S91: Critical values for detector  $\hat{H}_d^m$  and IM-OLS estimation in a model with intercept. The number of integrated regressors is 3 and the highest power of  $x_{kt}$  is 1.

| m    | 90 %    | 95 %     | 97,5 %   | 99 %     | m    | 90 %  | 95 %  | 97,5 % | 99 %  |
|------|---------|----------|----------|----------|------|-------|-------|--------|-------|
| 0.10 | 9987.17 | 16082.50 | 23691.51 | 36809.85 | 0.51 | 10.73 | 16.95 | 24.43  | 36.50 |
| 0.11 | 7222.98 | 11726.28 | 17322.43 | 26328.61 | 0.52 | 9.38  | 14.81 | 21.55  | 32.37 |
| 0.12 | 5387.64 | 8686.37  | 12767.25 | 19885.62 | 0.53 | 8.30  | 13.08 | 19.16  | 29.08 |
| 0.13 | 4051.36 | 6512.06  | 9727.34  | 15049.10 | 0.54 | 7.33  | 11.67 | 16.96  | 25.77 |
| 0.14 | 3152.93 | 5036.94  | 7415.01  | 11539.68 | 0.55 | 6.56  | 10.38 | 15.02  | 22.64 |
| 0.15 | 2478.54 | 3986.80  | 5832.27  | 9043.34  | 0.56 | 5.80  | 9.10  | 13.13  | 19.84 |
| 0.16 | 1971.44 | 3172.51  | 4706.80  | 7127.76  | 0.57 | 5.11  | 8.02  | 11.70  | 17.67 |
| 0.17 | 1577.88 | 2552.41  | 3811.81  | 5785.40  | 0.58 | 4.52  | 7.08  | 10.17  | 15.35 |
| 0.18 | 1276.04 | 2053.25  | 3022.35  | 4677.78  | 0.59 | 4.03  | 6.29  | 9.11   | 13.46 |
| 0.19 | 1031.70 | 1677.32  | 2482.52  | 3799.86  | 0.60 | 3.55  | 5.52  | 8.04   | 11.99 |
| 0.20 | 856.04  | 1373.12  | 2022.19  | 3111.19  | 0.61 | 3.14  | 4.90  | 6.99   | 10.40 |
| 0.21 | 705.11  | 1147.38  | 1690.36  | 2568.56  | 0.62 | 2.77  | 4.29  | 6.15   | 9.17  |
| 0.22 | 587.31  | 941.15   | 1389.10  | 2150.35  | 0.63 | 2.43  | 3.78  | 5.42   | 7.99  |
| 0.23 | 492.64  | 794.18   | 1165.33  | 1794.50  | 0.64 | 2.13  | 3.31  | 4.75   | 7.03  |
| 0.24 | 411.92  | 664.84   | 983.80   | 1519.58  | 0.65 | 1.85  | 2.86  | 4.15   | 6.11  |
| 0.25 | 349.31  | 567.96   | 845.32   | 1290.09  | 0.66 | 1.62  | 2.50  | 3.55   | 5.26  |
| 0.26 | 297.84  | 478.41   | 706.94   | 1094.72  | 0.67 | 1.43  | 2.17  | 3.10   | 4.60  |
| 0.27 | 255.66  | 410.48   | 604.25   | 938.64   | 0.68 | 1.24  | 1.91  | 2.70   | 3.98  |
| 0.28 | 219.21  | 350.43   | 522.17   | 816.64   | 0.69 | 1.07  | 1.65  | 2.33   | 3.44  |
| 0.29 | 186.80  | 301.99   | 442.02   | 688.33   | 0.70 | 0.94  | 1.43  | 2.03   | 3.02  |
| 0.30 | 161.52  | 260.36   | 380.02   | 591.56   | 0.71 | 0.81  | 1.25  | 1.78   | 2.60  |
| 0.31 | 139.52  | 225.17   | 331.15   | 496.95   | 0.72 | 0.70  | 1.08  | 1.52   | 2.22  |
| 0.32 | 121.92  | 195.01   | 287.39   | 435.06   | 0.73 | 0.61  | 0.93  | 1.29   | 1.89  |
| 0.33 | 105.35  | 168.78   | 246.95   | 374.66   | 0.74 | 0.52  | 0.79  | 1.12   | 1.64  |
| 0.34 | 91.38   | 146.71   | 217.60   | 334.35   | 0.75 | 0.44  | 0.67  | 0.95   | 1.39  |
| 0.35 | 80.15   | 129.37   | 191.50   | 292.50   | 0.76 | 0.38  | 0.57  | 0.81   | 1.18  |
| 0.36 | 70.50   | 112.96   | 166.00   | 256.19   | 0.77 | 0.33  | 0.49  | 0.68   | 0.98  |
| 0.37 | 61.50   | 100.32   | 145.34   | 219.84   | 0.78 | 0.28  | 0.41  | 0.58   | 0.81  |
| 0.38 | 53.85   | 86.15    | 127.01   | 191.59   | 0.79 | 0.24  | 0.35  | 0.48   | 0.68  |
| 0.39 | 47.41   | 75.86    | 111.11   | 166.85   | 0.80 | 0.21  | 0.29  | 0.40   | 0.57  |
| 0.40 | 41.70   | 66.55    | 97.36    | 145.58   | 0.81 | 0.18  | 0.25  | 0.34   | 0.47  |
| 0.41 | 36.73   | 58.55    | 85.45    | 128.47   | 0.82 | 0.17  | 0.22  | 0.28   | 0.39  |
| 0.42 | 32.35   | 51.67    | 75.07    | 112.74   | 0.83 | 0.15  | 0.19  | 0.24   | 0.33  |
| 0.43 | 28.55   | 45.18    | 66.37    | 100.38   | 0.84 | 0.14  | 0.17  | 0.21   | 0.28  |
| 0.44 | 25.01   | 40.32    | 58.11    | 88.08    | 0.85 | 0.12  | 0.16  | 0.19   | 0.24  |
| 0.45 | 22.19   | 35.47    | 51.49    | 78.07    | 0.86 | 0.12  | 0.14  | 0.17   | 0.22  |
| 0.46 | 19.81   | 31.47    | 45.58    | 68.79    | 0.87 | 0.11  | 0.13  | 0.16   | 0.20  |
| 0.47 | 17.47   | 27.67    | 40.32    | 61.26    | 0.88 | 0.10  | 0.13  | 0.15   | 0.19  |
| 0.48 | 15.51   | 24.48    | 35.62    | 53.72    | 0.89 | 0.10  | 0.12  | 0.15   | 0.18  |
| 0.49 | 13.69   | 21.59    | 31.40    | 46.82    | 0.90 | 0.10  | 0.12  | 0.14   | 0.17  |
| 0.50 | 12.04   | 18.99    | 27.52    | 41.72    |      |       |       |        |       |

Table S92: Critical values for detector  $\hat{H}_d^m$  and FM-OLS and D-OLS estimation in a model with intercept and linear trend. The number of integrated regressors is 3 and the highest power of  $x_{kt}$  is 1.

| m    | 90 %     | 95 %     | 97,5 %   | 99 %     | m    | 90 %  | 95 %  | 97,5 % | 99 %  |
|------|----------|----------|----------|----------|------|-------|-------|--------|-------|
| 0.10 | 19688.14 | 32775.14 | 50660.09 | 82652.87 | 0.51 | 21.06 | 34.68 | 51.87  | 82.46 |
| 0.11 | 14358.05 | 23669.29 | 36438.75 | 59576.89 | 0.52 | 18.62 | 30.54 | 46.05  | 73.23 |
| 0.12 | 10512.01 | 17605.61 | 26898.11 | 43234.70 | 0.53 | 16.50 | 27.16 | 40.85  | 64.26 |
| 0.13 | 7959.60  | 13373.08 | 20547.32 | 33076.96 | 0.54 | 14.57 | 23.97 | 36.48  | 56.78 |
| 0.14 | 6161.31  | 10193.99 | 15660.15 | 25330.35 | 0.55 | 12.88 | 21.13 | 32.44  | 50.03 |
| 0.15 | 4822.77  | 8061.19  | 12470.93 | 20098.48 | 0.56 | 11.43 | 18.79 | 28.52  | 44.30 |
| 0.16 | 3845.43  | 6451.13  | 9812.63  | 15714.15 | 0.57 | 10.14 | 16.52 | 25.17  | 39.44 |
| 0.17 | 3086.46  | 5123.56  | 7908.10  | 12445.61 | 0.58 | 8.97  | 14.61 | 21.84  | 34.54 |
| 0.18 | 2466.41  | 4146.82  | 6393.20  | 10158.03 | 0.59 | 7.94  | 12.82 | 19.14  | 30.32 |
| 0.19 | 2011.03  | 3339.58  | 5129.79  | 8294.40  | 0.60 | 7.01  | 11.33 | 16.89  | 26.60 |
| 0.20 | 1645.45  | 2745.31  | 4208.80  | 6909.03  | 0.61 | 6.20  | 10.03 | 14.83  | 23.38 |
| 0.21 | 1361.25  | 2252.59  | 3452.34  | 5642.04  | 0.62 | 5.45  | 8.84  | 13.12  | 20.46 |
| 0.22 | 1123.02  | 1896.31  | 2865.73  | 4717.47  | 0.63 | 4.83  | 7.81  | 11.46  | 18.03 |
| 0.23 | 948.89   | 1574.31  | 2449.06  | 3897.28  | 0.64 | 4.25  | 6.86  | 10.10  | 15.89 |
| 0.24 | 800.52   | 1337.79  | 2060.81  | 3306.17  | 0.65 | 3.73  | 5.98  | 8.83   | 13.90 |
| 0.25 | 679.72   | 1130.56  | 1726.48  | 2794.31  | 0.66 | 3.26  | 5.27  | 7.71   | 12.08 |
| 0.26 | 576.09   | 963.53   | 1478.64  | 2392.13  | 0.67 | 2.86  | 4.59  | 6.83   | 10.40 |
| 0.27 | 496.30   | 827.64   | 1267.91  | 2018.34  | 0.68 | 2.49  | 4.03  | 5.94   | 9.07  |
| 0.28 | 422.34   | 717.10   | 1101.00  | 1741.01  | 0.69 | 2.18  | 3.50  | 5.11   | 7.87  |
| 0.29 | 365.50   | 615.26   | 941.45   | 1519.14  | 0.70 | 1.90  | 3.02  | 4.43   | 6.81  |
| 0.30 | 315.22   | 531.88   | 816.59   | 1313.92  | 0.71 | 1.66  | 2.62  | 3.81   | 5.86  |
| 0.31 | 273.81   | 460.87   | 705.85   | 1129.99  | 0.72 | 1.44  | 2.27  | 3.32   | 5.14  |
| 0.32 | 237.44   | 395.86   | 607.31   | 978.54   | 0.73 | 1.24  | 1.95  | 2.87   | 4.35  |
| 0.33 | 206.34   | 345.89   | 526.89   | 845.46   | 0.74 | 1.08  | 1.69  | 2.47   | 3.70  |
| 0.34 | 179.26   | 296.47   | 452.36   | 731.55   | 0.75 | 0.93  | 1.45  | 2.11   | 3.15  |
| 0.35 | 156.44   | 261.65   | 396.06   | 631.74   | 0.76 | 0.80  | 1.24  | 1.80   | 2.71  |
| 0.36 | 137.25   | 228.79   | 344.13   | 546.79   | 0.77 | 0.68  | 1.06  | 1.53   | 2.28  |
| 0.37 | 120.37   | 200.26   | 304.51   | 487.45   | 0.78 | 0.58  | 0.90  | 1.31   | 1.94  |
| 0.38 | 105.26   | 176.94   | 265.32   | 432.90   | 0.79 | 0.49  | 0.76  | 1.09   | 1.64  |
| 0.39 | 92.55    | 155.07   | 235.13   | 379.28   | 0.80 | 0.41  | 0.64  | 0.91   | 1.36  |
| 0.40 | 81.72    | 136.48   | 207.73   | 330.45   | 0.81 | 0.34  | 0.53  | 0.76   | 1.13  |
| 0.41 | 72.32    | 121.29   | 182.43   | 289.03   | 0.82 | 0.29  | 0.45  | 0.63   | 0.94  |
| 0.42 | 64.01    | 106.54   | 161.37   | 252.18   | 0.83 | 0.24  | 0.37  | 0.52   | 0.77  |
| 0.43 | 56.71    | 94.31    | 143.14   | 221.69   | 0.84 | 0.20  | 0.30  | 0.43   | 0.64  |
| 0.44 | 50.00    | 82.67    | 126.69   | 199.92   | 0.85 | 0.16  | 0.25  | 0.35   | 0.52  |
| 0.45 | 44.01    | 72.99    | 111.31   | 176.13   | 0.86 | 0.13  | 0.20  | 0.28   | 0.41  |
| 0.46 | 38.90    | 64.97    | 97.58    | 155.56   | 0.87 | 0.10  | 0.16  | 0.22   | 0.32  |
| 0.47 | 34.60    | 56.99    | 86.74    | 136.77   | 0.88 | 0.08  | 0.12  | 0.17   | 0.25  |
| 0.48 | 30.63    | 50.42    | 76.36    | 120.39   | 0.89 | 0.06  | 0.09  | 0.13   | 0.20  |
| 0.49 | 27.02    | 44.70    | 67.32    | 105.26   | 0.90 | 0.05  | 0.07  | 0.10   | 0.15  |
| 0.50 | 23.78    | 39.48    | 58.44    | 92.57    |      |       |       |        |       |

Table S93: Critical values for detector  $\hat{H}_d^m$  and IM-OLS estimation in a model with intercept and linear trend. The number of integrated regressors is 3 and the highest power of  $x_{kt}$  is 1.

| m    | 90 %     | 95 %     | 97,5 %   | 99 %      | m    | 90 %  | 95 %  | 97,5 % | 99 %   |
|------|----------|----------|----------|-----------|------|-------|-------|--------|--------|
| 0.10 | 15043.27 | 37924.85 | 84526.93 | 210812.44 | 0.51 | 12.91 | 27.25 | 52.30  | 114.65 |
| 0.11 | 10912.76 | 26965.61 | 58955.21 | 145300.52 | 0.52 | 11.34 | 23.69 | 45.66  | 99.84  |
| 0.12 | 8033.75  | 20092.49 | 43493.03 | 105817.79 | 0.53 | 9.98  | 20.74 | 39.54  | 85.23  |
| 0.13 | 5953.93  | 15031.00 | 32720.51 | 78527.11  | 0.54 | 8.83  | 18.38 | 34.77  | 73.35  |
| 0.14 | 4487.52  | 11418.92 | 24622.74 | 58957.83  | 0.55 | 7.76  | 15.86 | 30.43  | 64.36  |
| 0.15 | 3480.80  | 9126.59  | 19297.94 | 44639.66  | 0.56 | 6.81  | 13.90 | 26.51  | 54.17  |
| 0.16 | 2779.01  | 7006.33  | 15010.17 | 35051.93  | 0.57 | 5.97  | 12.29 | 22.97  | 47.50  |
| 0.17 | 2213.67  | 5538.42  | 11948.17 | 28162.16  | 0.58 | 5.24  | 10.77 | 20.08  | 41.60  |
| 0.18 | 1759.30  | 4422.18  | 9551.24  | 22495.90  | 0.59 | 4.61  | 9.27  | 17.19  | 36.07  |
| 0.19 | 1441.96  | 3560.91  | 7569.59  | 17545.30  | 0.60 | 4.09  | 8.09  | 15.07  | 31.54  |
| 0.20 | 1177.31  | 2899.84  | 6247.76  | 14548.06  | 0.61 | 3.56  | 7.19  | 13.20  | 27.56  |
| 0.21 | 953.17   | 2394.49  | 5033.43  | 12011.23  | 0.62 | 3.10  | 6.15  | 11.45  | 24.20  |
| 0.22 | 797.55   | 1963.93  | 4193.14  | 9887.63   | 0.63 | 2.71  | 5.33  | 10.00  | 20.30  |
| 0.23 | 673.47   | 1649.83  | 3579.30  | 8139.20   | 0.64 | 2.38  | 4.63  | 8.61   | 17.74  |
| 0.24 | 566.71   | 1361.80  | 2986.03  | 6925.15   | 0.65 | 2.06  | 3.98  | 7.38   | 15.06  |
| 0.25 | 475.14   | 1138.86  | 2519.44  | 5752.64   | 0.66 | 1.81  | 3.42  | 6.26   | 13.27  |
| 0.26 | 406.48   | 969.76   | 2085.12  | 4799.14   | 0.67 | 1.57  | 2.95  | 5.45   | 11.35  |
| 0.27 | 346.04   | 817.93   | 1745.91  | 3992.51   | 0.68 | 1.35  | 2.59  | 4.61   | 9.39   |
| 0.28 | 295.51   | 698.09   | 1512.20  | 3434.89   | 0.69 | 1.17  | 2.22  | 3.97   | 8.16   |
| 0.29 | 250.58   | 599.21   | 1262.97  | 2964.15   | 0.70 | 1.01  | 1.90  | 3.34   | 6.81   |
| 0.30 | 214.83   | 509.37   | 1067.25  | 2512.84   | 0.71 | 0.87  | 1.61  | 2.85   | 5.60   |
| 0.31 | 181.77   | 435.74   | 907.19   | 2111.76   | 0.72 | 0.75  | 1.38  | 2.41   | 4.73   |
| 0.32 | 157.51   | 374.81   | 779.27   | 1787.59   | 0.73 | 0.64  | 1.17  | 2.00   | 3.95   |
| 0.33 | 136.30   | 323.81   | 681.53   | 1536.34   | 0.74 | 0.55  | 0.99  | 1.66   | 3.21   |
| 0.34 | 117.20   | 274.47   | 572.92   | 1318.30   | 0.75 | 0.47  | 0.83  | 1.39   | 2.74   |
| 0.35 | 101.95   | 238.77   | 490.61   | 1139.45   | 0.76 | 0.41  | 0.71  | 1.21   | 2.26   |
| 0.36 | 89.53    | 208.50   | 428.56   | 963.01    | 0.77 | 0.35  | 0.59  | 0.99   | 1.83   |
| 0.37 | 78.54    | 178.84   | 367.32   | 839.27    | 0.78 | 0.30  | 0.50  | 0.82   | 1.51   |
| 0.38 | 67.98    | 156.14   | 315.82   | 707.78    | 0.79 | 0.26  | 0.42  | 0.66   | 1.20   |
| 0.39 | 60.24    | 134.16   | 273.54   | 612.78    | 0.80 | 0.23  | 0.35  | 0.55   | 0.98   |
| 0.40 | 52.97    | 117.79   | 237.65   | 538.49    | 0.81 | 0.21  | 0.31  | 0.46   | 0.79   |
| 0.41 | 46.69    | 102.43   | 207.31   | 463.00    | 0.82 | 0.18  | 0.27  | 0.38   | 0.64   |
| 0.42 | 40.57    | 88.90    | 179.72   | 405.90    | 0.83 | 0.17  | 0.24  | 0.33   | 0.52   |
| 0.43 | 35.47    | 77.96    | 155.86   | 356.67    | 0.84 | 0.16  | 0.22  | 0.30   | 0.45   |
| 0.44 | 31.63    | 68.51    | 135.81   | 300.76    | 0.85 | 0.15  | 0.20  | 0.27   | 0.39   |
| 0.45 | 27.58    | 59.79    | 118.28   | 260.97    | 0.86 | 0.14  | 0.19  | 0.25   | 0.35   |
| 0.46 | 24.10    | 52.56    | 104.36   | 224.60    | 0.87 | 0.13  | 0.18  | 0.23   | 0.32   |
| 0.47 | 21.41    | 45.90    | 91.05    | 193.69    | 0.88 | 0.13  | 0.17  | 0.22   | 0.31   |
| 0.48 | 18.84    | 40.20    | 79.91    | 176.27    | 0.89 | 0.13  | 0.17  | 0.22   | 0.29   |
| 0.49 | 16.42    | 35.09    | 69.58    | 153.49    | 0.90 | 0.12  | 0.16  | 0.21   | 0.29   |
| 0.50 | 14.51    | 30.97    | 60.57    | 129.34    |      |       |       |        |        |

Table S94: Critical values for detector  $\hat{H}_d^m$  and FM-OLS and D-OLS estimation in a model with intercept. The number of integrated regressors is 3 and the highest power of  $x_{kt}$  is 2.

| m    | 90 %     | 95 %     | 97,5 %    | 99 %      | m    | 90 %  | 95 %  | 97,5 % | 99 %   |
|------|----------|----------|-----------|-----------|------|-------|-------|--------|--------|
| 0.10 | 36923.69 | 99741.09 | 229606.96 | 576422.40 | 0.51 | 30.17 | 68.46 | 140.72 | 321.32 |
| 0.11 | 26644.62 | 70685.20 | 159844.25 | 405200.60 | 0.52 | 26.74 | 61.26 | 124.55 | 279.79 |
| 0.12 | 19923.44 | 53557.57 | 117395.21 | 311255.16 | 0.53 | 23.67 | 52.80 | 108.78 | 250.09 |
| 0.13 | 14993.61 | 40239.14 | 90283.98  | 222305.59 | 0.54 | 20.68 | 46.41 | 93.57  | 223.67 |
| 0.14 | 11418.73 | 30403.43 | 70022.41  | 166441.31 | 0.55 | 18.06 | 40.54 | 82.69  | 198.71 |
| 0.15 | 8817.57  | 23359.04 | 52759.18  | 130724.48 | 0.56 | 15.80 | 35.92 | 73.14  | 167.39 |
| 0.16 | 6907.28  | 18153.59 | 41697.51  | 107167.13 | 0.57 | 13.78 | 31.32 | 63.43  | 144.55 |
| 0.17 | 5518.02  | 14279.42 | 32714.62  | 84710.62  | 0.58 | 12.20 | 26.93 | 55.56  | 126.92 |
| 0.18 | 4377.57  | 11407.20 | 25837.39  | 69481.00  | 0.59 | 10.67 | 23.63 | 47.91  | 111.84 |
| 0.19 | 3500.59  | 9328.59  | 21247.57  | 54611.82  | 0.60 | 9.39  | 20.67 | 42.21  | 93.37  |
| 0.20 | 2866.79  | 7531.12  | 16663.92  | 43791.69  | 0.61 | 8.31  | 17.96 | 36.12  | 80.85  |
| 0.21 | 2349.65  | 6080.80  | 13614.20  | 34124.54  | 0.62 | 7.23  | 15.62 | 31.37  | 68.96  |
| 0.22 | 1943.48  | 4979.50  | 11292.34  | 28082.54  | 0.63 | 6.39  | 13.48 | 27.27  | 60.09  |
| 0.23 | 1631.79  | 4145.85  | 9555.15   | 23717.99  | 0.64 | 5.56  | 11.65 | 23.11  | 52.12  |
| 0.24 | 1360.00  | 3515.66  | 7918.73   | 19501.09  | 0.65 | 4.83  | 10.12 | 19.87  | 44.28  |
| 0.25 | 1157.55  | 2959.30  | 6619.65   | 16719.95  | 0.66 | 4.16  | 8.68  | 16.93  | 38.39  |
| 0.26 | 971.98   | 2539.20  | 5667.25   | 14301.49  | 0.67 | 3.63  | 7.43  | 14.40  | 32.93  |
| 0.27 | 826.20   | 2163.12  | 4700.00   | 12080.87  | 0.68 | 3.17  | 6.39  | 12.25  | 27.63  |
| 0.28 | 705.07   | 1795.72  | 3937.97   | 10142.88  | 0.69 | 2.74  | 5.52  | 10.56  | 23.11  |
| 0.29 | 604.72   | 1516.70  | 3364.59   | 8555.18   | 0.70 | 2.38  | 4.72  | 8.92   | 20.00  |
| 0.30 | 515.84   | 1291.42  | 2884.02   | 7600.32   | 0.71 | 2.03  | 4.04  | 7.57   | 16.54  |
| 0.31 | 438.51   | 1100.21  | 2482.13   | 6280.10   | 0.72 | 1.76  | 3.46  | 6.39   | 13.87  |
| 0.32 | 379.06   | 946.42   | 2128.72   | 5424.69   | 0.73 | 1.51  | 2.95  | 5.39   | 11.48  |
| 0.33 | 326.66   | 814.33   | 1821.37   | 4550.13   | 0.74 | 1.29  | 2.50  | 4.50   | 9.53   |
| 0.34 | 285.89   | 698.56   | 1531.43   | 3954.41   | 0.75 | 1.12  | 2.10  | 3.78   | 7.77   |
| 0.35 | 248.28   | 601.21   | 1317.35   | 3268.15   | 0.76 | 0.95  | 1.78  | 3.18   | 6.52   |
| 0.36 | 213.76   | 524.18   | 1140.22   | 2745.43   | 0.77 | 0.80  | 1.50  | 2.64   | 5.37   |
| 0.37 | 187.04   | 454.34   | 991.77    | 2392.87   | 0.78 | 0.67  | 1.26  | 2.21   | 4.51   |
| 0.38 | 164.05   | 396.84   | 851.71    | 2034.54   | 0.79 | 0.57  | 1.05  | 1.81   | 3.59   |
| 0.39 | 143.34   | 341.57   | 730.30    | 1764.82   | 0.80 | 0.47  | 0.86  | 1.48   | 2.93   |
| 0.40 | 125.60   | 304.88   | 644.27    | 1512.92   | 0.81 | 0.39  | 0.71  | 1.21   | 2.36   |
| 0.41 | 109.25   | 262.66   | 567.11    | 1326.77   | 0.82 | 0.33  | 0.58  | 0.98   | 1.88   |
| 0.42 | 95.17    | 229.53   | 487.22    | 1166.36   | 0.83 | 0.27  | 0.47  | 0.80   | 1.52   |
| 0.43 | 83.82    | 199.86   | 422.59    | 1006.45   | 0.84 | 0.22  | 0.38  | 0.63   | 1.21   |
| 0.44 | 73.43    | 172.99   | 366.64    | 885.31    | 0.85 | 0.18  | 0.31  | 0.51   | 0.95   |
| 0.45 | 64.50    | 151.25   | 321.53    | 760.04    | 0.86 | 0.14  | 0.24  | 0.40   | 0.74   |
| 0.46 | 56.76    | 131.64   | 280.75    | 662.33    | 0.87 | 0.11  | 0.19  | 0.31   | 0.56   |
| 0.47 | 50.46    | 115.31   | 244.98    | 580.71    | 0.88 | 0.09  | 0.15  | 0.24   | 0.43   |
| 0.48 | 44.83    | 101.28   | 210.72    | 503.22    | 0.89 | 0.07  | 0.11  | 0.18   | 0.31   |
| 0.49 | 39.37    | 88.51    | 184.18    | 435.21    | 0.90 | 0.05  | 0.08  | 0.13   | 0.22   |
| 0.50 | 34.63    | 77.90    | 159.87    | 375.11    |      |       |       |        |        |

Table S95: Critical values for detector  $\hat{H}_d^m$  and IM-OLS estimation in a model with intercept. The number of integrated regressors is 3 and the highest power of  $x_{kt}$  is 2.



| m    | 90 %     | 95 %     | 97,5 %    | 99 %      | m    | 90 %  | 95 %  | 97,5 % | 99 %   |
|------|----------|----------|-----------|-----------|------|-------|-------|--------|--------|
| 0.10 | 33209.40 | 65561.91 | 126267.05 | 278913.65 | 0.51 | 21.71 | 38.56 | 66.39  | 131.55 |
| 0.11 | 23380.06 | 46235.10 | 87307.92  | 191132.66 | 0.52 | 18.91 | 33.86 | 57.71  | 115.91 |
| 0.12 | 17143.93 | 33582.42 | 62191.95  | 142475.93 | 0.53 | 16.67 | 29.85 | 50.32  | 98.16  |
| 0.13 | 12608.17 | 24398.51 | 45290.82  | 100657.49 | 0.54 | 14.70 | 26.12 | 43.69  | 86.95  |
| 0.14 | 9520.11  | 18648.72 | 33942.65  | 74048.85  | 0.55 | 12.85 | 22.85 | 37.97  | 73.86  |
| 0.15 | 7378.39  | 14347.66 | 26158.73  | 56437.14  | 0.56 | 11.26 | 19.85 | 33.41  | 63.48  |
| 0.16 | 5775.59  | 11171.15 | 20607.13  | 43543.88  | 0.57 | 9.85  | 17.43 | 28.97  | 55.42  |
| 0.17 | 4592.52  | 8800.34  | 15860.18  | 33943.35  | 0.58 | 8.63  | 15.27 | 25.43  | 47.55  |
| 0.18 | 3646.06  | 6885.21  | 12611.89  | 27211.28  | 0.59 | 7.51  | 13.23 | 21.86  | 40.76  |
| 0.19 | 2911.72  | 5531.25  | 10165.30  | 21348.18  | 0.60 | 6.56  | 11.55 | 19.32  | 35.58  |
| 0.20 | 2344.62  | 4528.92  | 8286.88   | 17593.36  | 0.61 | 5.77  | 10.11 | 16.97  | 31.42  |
| 0.21 | 1924.16  | 3651.93  | 6619.44   | 14465.22  | 0.62 | 5.04  | 8.79  | 14.61  | 27.58  |
| 0.22 | 1572.00  | 2985.28  | 5448.64   | 11940.29  | 0.63 | 4.39  | 7.60  | 12.61  | 23.57  |
| 0.23 | 1321.09  | 2498.71  | 4550.00   | 9496.91   | 0.64 | 3.80  | 6.60  | 10.93  | 20.52  |
| 0.24 | 1101.19  | 2080.41  | 3752.01   | 7873.79   | 0.65 | 3.27  | 5.69  | 9.49   | 17.80  |
| 0.25 | 916.42   | 1749.48  | 3165.08   | 6677.62   | 0.66 | 2.81  | 4.81  | 8.10   | 15.12  |
| 0.26 | 768.97   | 1465.42  | 2653.46   | 5568.79   | 0.67 | 2.44  | 4.22  | 6.90   | 13.00  |
| 0.27 | 651.04   | 1231.38  | 2186.65   | 4700.85   | 0.68 | 2.12  | 3.60  | 5.82   | 11.06  |
| 0.28 | 555.81   | 1045.42  | 1874.43   | 3975.27   | 0.69 | 1.80  | 3.09  | 5.08   | 9.64   |
| 0.29 | 468.12   | 879.54   | 1586.36   | 3387.40   | 0.70 | 1.55  | 2.65  | 4.26   | 7.97   |
| 0.30 | 398.41   | 751.69   | 1348.24   | 2852.55   | 0.71 | 1.34  | 2.26  | 3.61   | 6.53   |
| 0.31 | 340.60   | 637.90   | 1139.39   | 2386.87   | 0.72 | 1.14  | 1.91  | 3.05   | 5.57   |
| 0.32 | 292.67   | 545.85   | 977.53    | 2023.81   | 0.73 | 0.97  | 1.62  | 2.55   | 4.64   |
| 0.33 | 251.20   | 469.30   | 841.93    | 1725.70   | 0.74 | 0.83  | 1.35  | 2.12   | 3.70   |
| 0.34 | 215.97   | 406.40   | 720.65    | 1497.33   | 0.75 | 0.70  | 1.15  | 1.77   | 3.18   |
| 0.35 | 186.85   | 349.45   | 619.24    | 1291.86   | 0.76 | 0.59  | 0.97  | 1.53   | 2.64   |
| 0.36 | 161.27   | 304.63   | 534.86    | 1104.53   | 0.77 | 0.49  | 0.80  | 1.24   | 2.11   |
| 0.37 | 141.52   | 259.75   | 459.67    | 947.45    | 0.78 | 0.41  | 0.66  | 1.04   | 1.81   |
| 0.38 | 122.50   | 225.21   | 394.18    | 809.39    | 0.79 | 0.33  | 0.54  | 0.85   | 1.43   |
| 0.39 | 106.39   | 195.03   | 349.19    | 705.98    | 0.80 | 0.28  | 0.44  | 0.68   | 1.15   |
| 0.40 | 92.95    | 171.53   | 301.30    | 608.58    | 0.81 | 0.23  | 0.37  | 0.55   | 0.92   |
| 0.41 | 80.85    | 148.01   | 262.57    | 537.03    | 0.82 | 0.19  | 0.30  | 0.44   | 0.74   |
| 0.42 | 70.73    | 128.68   | 231.55    | 455.97    | 0.83 | 0.17  | 0.25  | 0.35   | 0.57   |
| 0.43 | 61.83    | 111.96   | 198.32    | 401.71    | 0.84 | 0.14  | 0.20  | 0.29   | 0.46   |
| 0.44 | 54.26    | 98.23    | 171.26    | 346.58    | 0.85 | 0.13  | 0.17  | 0.23   | 0.35   |
| 0.45 | 47.50    | 85.24    | 149.63    | 299.96    | 0.86 | 0.11  | 0.15  | 0.19   | 0.28   |
| 0.46 | 41.58    | 75.15    | 130.01    | 259.33    | 0.87 | 0.10  | 0.13  | 0.17   | 0.23   |
| 0.47 | 36.70    | 65.12    | 114.53    | 226.07    | 0.88 | 0.10  | 0.12  | 0.15   | 0.19   |
| 0.48 | 32.13    | 57.82    | 100.94    | 199.98    | 0.89 | 0.09  | 0.11  | 0.14   | 0.17   |
| 0.49 | 27.93    | 50.60    | 88.84     | 177.13    | 0.90 | 0.09  | 0.11  | 0.13   | 0.16   |
| 0.50 | 24.60    | 44.20    | 76.95     | 151.42    |      |       |       |        |        |

Table S96: Critical values for detector  $\hat{H}_d^m$  and FM-OLS and D-OLS estimation in a model with intercept and linear trend. The number of integrated regressors is 3 and the highest power of  $x_{kt}$  is 2.

| m    | 90 %     | 95 %      | 97,5 %    | 99 %      | m    | 90 %  | 95 %  | 97,5 % | 99 %   |
|------|----------|-----------|-----------|-----------|------|-------|-------|--------|--------|
| 0.10 | 74866.71 | 156838.49 | 317131.01 | 736921.74 | 0.51 | 46.98 | 89.95 | 164.47 | 346.98 |
| 0.11 | 52702.41 | 110432.02 | 217082.37 | 501091.56 | 0.52 | 41.14 | 78.75 | 142.25 | 298.25 |
| 0.12 | 38306.84 | 79767.05  | 157835.44 | 370987.72 | 0.53 | 36.19 | 69.45 | 125.66 | 266.72 |
| 0.13 | 28803.04 | 59186.49  | 116157.55 | 258654.44 | 0.54 | 31.96 | 60.97 | 110.34 | 231.27 |
| 0.14 | 21460.20 | 45147.63  | 88484.26  | 207302.41 | 0.55 | 28.21 | 53.66 | 96.16  | 203.90 |
| 0.15 | 16535.22 | 34351.73  | 66635.86  | 155457.59 | 0.56 | 24.59 | 47.15 | 84.54  | 177.32 |
| 0.16 | 12690.76 | 26758.12  | 52365.05  | 122571.85 | 0.57 | 21.57 | 40.72 | 72.96  | 150.97 |
| 0.17 | 10049.63 | 20721.43  | 41144.26  | 92791.68  | 0.58 | 18.83 | 35.47 | 63.22  | 132.67 |
| 0.18 | 7990.06  | 16458.38  | 32584.22  | 74740.55  | 0.59 | 16.37 | 30.76 | 55.48  | 116.19 |
| 0.19 | 6388.14  | 13198.19  | 26158.85  | 60789.31  | 0.60 | 14.28 | 26.68 | 47.65  | 98.87  |
| 0.20 | 5177.17  | 10575.24  | 20835.01  | 48498.09  | 0.61 | 12.42 | 23.36 | 41.04  | 85.97  |
| 0.21 | 4176.34  | 8573.25   | 16767.05  | 37719.62  | 0.62 | 10.90 | 20.36 | 36.07  | 73.44  |
| 0.22 | 3435.19  | 7063.86   | 13841.99  | 30806.49  | 0.63 | 9.47  | 17.83 | 31.30  | 62.86  |
| 0.23 | 2861.11  | 5824.01   | 11381.92  | 25322.59  | 0.64 | 8.29  | 15.37 | 26.79  | 53.95  |
| 0.24 | 2392.35  | 4878.64   | 9306.06   | 20948.99  | 0.65 | 7.18  | 13.28 | 22.97  | 46.01  |
| 0.25 | 2004.77  | 4064.59   | 7780.61   | 17429.30  | 0.66 | 6.21  | 11.39 | 19.70  | 39.76  |
| 0.26 | 1703.67  | 3418.80   | 6683.01   | 14867.62  | 0.67 | 5.34  | 9.82  | 16.74  | 33.79  |
| 0.27 | 1437.03  | 2903.14   | 5672.66   | 12682.65  | 0.68 | 4.59  | 8.44  | 14.25  | 28.05  |
| 0.28 | 1219.41  | 2439.49   | 4585.57   | 10598.42  | 0.69 | 3.97  | 7.18  | 12.33  | 24.44  |
| 0.29 | 1038.69  | 2060.85   | 3890.19   | 9093.26   | 0.70 | 3.40  | 6.13  | 10.56  | 20.91  |
| 0.30 | 885.14   | 1747.75   | 3377.44   | 7772.85   | 0.71 | 2.91  | 5.22  | 9.03   | 17.38  |
| 0.31 | 758.50   | 1516.44   | 2923.87   | 6538.40   | 0.72 | 2.50  | 4.42  | 7.53   | 14.48  |
| 0.32 | 644.97   | 1302.71   | 2513.33   | 5457.68   | 0.73 | 2.13  | 3.75  | 6.37   | 12.03  |
| 0.33 | 552.30   | 1115.18   | 2124.88   | 4611.13   | 0.74 | 1.81  | 3.19  | 5.31   | 9.86   |
| 0.34 | 479.75   | 946.86    | 1819.13   | 4045.24   | 0.75 | 1.53  | 2.68  | 4.39   | 8.37   |
| 0.35 | 413.55   | 817.17    | 1538.84   | 3396.53   | 0.76 | 1.30  | 2.26  | 3.67   | 6.84   |
| 0.36 | 356.06   | 704.88    | 1319.85   | 2882.67   | 0.77 | 1.11  | 1.91  | 3.08   | 5.58   |
| 0.37 | 308.55   | 610.13    | 1153.97   | 2545.64   | 0.78 | 0.93  | 1.59  | 2.57   | 4.60   |
| 0.38 | 268.98   | 530.78    | 991.14    | 2175.49   | 0.79 | 0.78  | 1.31  | 2.11   | 3.81   |
| 0.39 | 235.31   | 457.76    | 850.56    | 1875.66   | 0.80 | 0.64  | 1.08  | 1.71   | 3.10   |
| 0.40 | 205.10   | 396.31    | 734.10    | 1610.39   | 0.81 | 0.53  | 0.89  | 1.39   | 2.54   |
| 0.41 | 180.37   | 346.32    | 636.36    | 1402.64   | 0.82 | 0.43  | 0.72  | 1.14   | 2.06   |
| 0.42 | 156.03   | 304.98    | 552.37    | 1206.57   | 0.83 | 0.35  | 0.59  | 0.93   | 1.63   |
| 0.43 | 135.05   | 262.09    | 486.92    | 1056.97   | 0.84 | 0.28  | 0.47  | 0.74   | 1.30   |
| 0.44 | 117.20   | 230.45    | 425.50    | 927.61    | 0.85 | 0.23  | 0.38  | 0.58   | 1.02   |
| 0.45 | 103.60   | 201.62    | 368.77    | 808.65    | 0.86 | 0.18  | 0.30  | 0.46   | 0.78   |
| 0.46 | 90.85    | 177.54    | 324.98    | 689.45    | 0.87 | 0.14  | 0.23  | 0.35   | 0.60   |
| 0.47 | 80.35    | 154.77    | 283.17    | 610.03    | 0.88 | 0.11  | 0.18  | 0.27   | 0.44   |
| 0.48 | 71.12    | 134.72    | 246.55    | 524.11    | 0.89 | 0.08  | 0.13  | 0.20   | 0.33   |
| 0.49 | 61.69    | 117.92    | 218.44    | 458.14    | 0.90 | 0.06  | 0.10  | 0.15   | 0.24   |
| 0.50 | 54.13    | 102.69    | 189.58    | 398.02    |      |       |       |        |        |

Table S97: Critical values for detector  $\hat{H}_d^m$  and IM-OLS estimation in a model with intercept and linear trend. The number of integrated regressors is 3 and the highest power of  $x_{kt}$  is 2.

| m    | 90 %       | 95 %       | 97,5 %      | 99 %        | m    | 90 %   | 95 %   | 97,5 %  | 99 %    |
|------|------------|------------|-------------|-------------|------|--------|--------|---------|---------|
| 0.10 | 1494856.94 | 5625351.32 | 16301287.50 | 53474471.10 | 0.51 | 105.39 | 373.63 | 1031.21 | 3091.72 |
| 0.11 | 970309.37  | 3539248.96 | 10619276.65 | 36529233.11 | 0.52 | 87.39  | 310.17 | 852.70  | 2585.59 |
| 0.12 | 654468.41  | 2313543.54 | 6994200.97  | 23489961.68 | 0.53 | 72.35  | 256.19 | 706.75  | 2166.50 |
| 0.13 | 445027.51  | 1610196.73 | 4758259.53  | 15771902.27 | 0.54 | 61.53  | 215.12 | 574.53  | 1798.66 |
| 0.14 | 303281.23  | 1113314.62 | 3276227.11  | 11232438.22 | 0.55 | 51.50  | 178.00 | 492.71  | 1513.50 |
| 0.15 | 219516.97  | 795801.78  | 2435848.42  | 8180239.73  | 0.56 | 43.00  | 144.98 | 405.58  | 1223.02 |
| 0.16 | 156829.51  | 581793.79  | 1700063.47  | 5746555.68  | 0.57 | 37.25  | 123.59 | 334.77  | 1016.80 |
| 0.17 | 116422.00  | 434617.01  | 1221361.39  | 4215988.59  | 0.58 | 31.39  | 101.89 | 283.84  | 891.49  |
| 0.18 | 86250.92   | 325415.95  | 938171.98   | 3092304.78  | 0.59 | 26.03  | 84.70  | 236.81  | 723.24  |
| 0.19 | 65046.62   | 243472.31  | 703386.47   | 2371528.56  | 0.60 | 21.51  | 70.87  | 197.02  | 616.90  |
| 0.20 | 49826.56   | 185241.28  | 527831.14   | 1744763.39  | 0.61 | 18.14  | 60.64  | 167.82  | 525.72  |
| 0.21 | 38120.63   | 141478.39  | 407632.40   | 1394409.37  | 0.62 | 15.26  | 50.47  | 136.91  | 428.78  |
| 0.22 | 29286.43   | 110767.73  | 315928.82   | 1024220.46  | 0.63 | 12.81  | 41.47  | 110.13  | 340.85  |
| 0.23 | 23062.99   | 85989.35   | 253628.79   | 811675.11   | 0.64 | 10.54  | 34.37  | 89.79   | 281.84  |
| 0.24 | 18253.14   | 67648.80   | 195814.56   | 649123.56   | 0.65 | 8.74   | 28.47  | 74.29   | 225.15  |
| 0.25 | 14648.88   | 54370.53   | 156233.68   | 511213.41   | 0.66 | 7.18   | 22.69  | 60.28   | 181.60  |
| 0.26 | 11763.53   | 42956.53   | 125509.00   | 395671.65   | 0.67 | 6.00   | 18.93  | 49.45   | 148.14  |
| 0.27 | 9201.92    | 33886.01   | 99595.55    | 313553.02   | 0.68 | 5.01   | 15.14  | 40.10   | 119.66  |
| 0.28 | 7469.91    | 27876.93   | 78593.22    | 254423.34   | 0.69 | 4.06   | 12.59  | 33.34   | 91.77   |
| 0.29 | 6109.01    | 22307.19   | 64333.68    | 197280.36   | 0.70 | 3.37   | 10.36  | 26.56   | 75.23   |
| 0.30 | 4938.26    | 17979.19   | 53036.94    | 161261.58   | 0.71 | 2.77   | 8.21   | 20.95   | 61.95   |
| 0.31 | 4017.68    | 14377.45   | 42130.48    | 136491.18   | 0.72 | 2.30   | 6.75   | 16.94   | 48.62   |
| 0.32 | 3307.65    | 11784.96   | 34963.30    | 111349.83   | 0.73 | 1.89   | 5.53   | 14.10   | 40.95   |
| 0.33 | 2694.86    | 9609.37    | 28792.76    | 90014.90    | 0.74 | 1.51   | 4.45   | 11.01   | 32.11   |
| 0.34 | 2184.74    | 7874.18    | 23571.33    | 70602.87    | 0.75 | 1.24   | 3.52   | 8.78    | 25.61   |
| 0.35 | 1834.56    | 6528.53    | 19311.43    | 59304.16    | 0.76 | 1.00   | 2.81   | 6.99    | 19.96   |
| 0.36 | 1521.88    | 5467.81    | 16243.99    | 48983.74    | 0.77 | 0.80   | 2.24   | 5.48    | 15.81   |
| 0.37 | 1269.69    | 4522.94    | 12987.51    | 41399.57    | 0.78 | 0.65   | 1.80   | 4.35    | 11.69   |
| 0.38 | 1035.38    | 3746.47    | 10887.39    | 33986.31    | 0.79 | 0.52   | 1.38   | 3.29    | 9.17    |
| 0.39 | 890.60     | 3122.94    | 8811.70     | 28141.62    | 0.80 | 0.42   | 1.08   | 2.61    | 6.94    |
| 0.40 | 741.06     | 2547.26    | 7446.09     | 23756.91    | 0.81 | 0.34   | 0.84   | 1.98    | 5.34    |
| 0.41 | 613.61     | 2189.07    | 5964.83     | 19769.23    | 0.82 | 0.28   | 0.65   | 1.55    | 4.05    |
| 0.42 | 515.49     | 1816.80    | 5000.85     | 16005.30    | 0.83 | 0.24   | 0.49   | 1.15    | 2.93    |
| 0.43 | 429.05     | 1504.09    | 4217.32     | 13021.12    | 0.84 | 0.21   | 0.38   | 0.84    | 2.15    |
| 0.44 | 358.59     | 1265.39    | 3494.08     | 10894.55    | 0.85 | 0.18   | 0.31   | 0.62    | 1.57    |
| 0.45 | 300.09     | 1055.45    | 2914.30     | 9129.51     | 0.86 | 0.16   | 0.26   | 0.45    | 1.13    |
| 0.46 | 251.79     | 884.21     | 2388.58     | 7308.87     | 0.87 | 0.15   | 0.22   | 0.36    | 0.78    |
| 0.47 | 212.46     | 740.79     | 1989.17     | 6178.48     | 0.88 | 0.14   | 0.20   | 0.30    | 0.55    |
| 0.48 | 179.94     | 628.59     | 1708.11     | 5211.45     | 0.89 | 0.13   | 0.18   | 0.26    | 0.41    |
| 0.49 | 150.85     | 532.03     | 1489.09     | 4493.45     | 0.90 | 0.12   | 0.17   | 0.23    | 0.35    |
| 0.50 | 126.35     | 441.75     | 1279.30     | 3778.15     |      |        |        |         |         |

Table S98: Critical values for detector  $\hat{H}_d^m$  and FM-OLS and D-OLS estimation in a model with intercept. The number of integrated regressors is 3 and the highest power of  $x_{kt}$  is 3.

| m    | 90 %       | 95 %        | 97,5 %      | 99 %         | m    | 90 %   | 95 %    | 97,5 %  | 99 %     |
|------|------------|-------------|-------------|--------------|------|--------|---------|---------|----------|
| 0.10 | 5199629.71 | 20392048.45 | 64678343.76 | 246531408.00 | 0.51 | 360.39 | 1328.94 | 3883.73 | 12947.40 |
| 0.11 | 3342879.76 | 13417595.89 | 42100242.90 | 156267164.63 | 0.52 | 300.07 | 1097.20 | 3277.99 | 10768.54 |
| 0.12 | 2230237.48 | 8825388.35  | 28148902.42 | 103577398.37 | 0.53 | 251.55 | 927.50  | 2738.83 | 8977.14  |
| 0.13 | 1512704.80 | 6001508.99  | 19220827.58 | 70329857.05  | 0.54 | 212.31 | 775.13  | 2295.79 | 7577.80  |
| 0.14 | 1048669.08 | 4131374.40  | 13140842.73 | 50763002.40  | 0.55 | 177.91 | 657.05  | 1921.00 | 6527.55  |
| 0.15 | 738465.23  | 2959042.81  | 9395771.82  | 34703183.71  | 0.56 | 148.76 | 556.19  | 1586.81 | 5297.01  |
| 0.16 | 539362.46  | 2107096.37  | 6931552.71  | 25499016.22  | 0.57 | 125.64 | 457.68  | 1342.91 | 4338.03  |
| 0.17 | 399020.57  | 1586404.15  | 4867636.08  | 17851268.82  | 0.58 | 106.08 | 378.38  | 1118.71 | 3529.32  |
| 0.18 | 299762.72  | 1179685.58  | 3757074.03  | 13588157.32  | 0.59 | 88.88  | 321.78  | 948.83  | 2940.31  |
| 0.19 | 226436.23  | 885042.99   | 2762633.05  | 10081911.66  | 0.60 | 74.06  | 269.24  | 770.36  | 2512.33  |
| 0.20 | 169058.74  | 680517.97   | 2101161.52  | 7837756.59   | 0.61 | 61.42  | 224.46  | 643.68  | 2096.08  |
| 0.21 | 132509.34  | 515820.36   | 1603806.69  | 5916375.44   | 0.62 | 51.52  | 189.22  | 541.23  | 1792.40  |
| 0.22 | 100610.03  | 396343.76   | 1219414.95  | 4474905.60   | 0.63 | 42.98  | 156.78  | 446.57  | 1459.52  |
| 0.23 | 78425.72   | 302179.35   | 968329.77   | 3505047.28   | 0.64 | 35.25  | 126.51  | 376.80  | 1197.15  |
| 0.24 | 62010.47   | 245434.40   | 774916.44   | 2754355.75   | 0.65 | 29.26  | 103.14  | 305.19  | 976.34   |
| 0.25 | 49149.59   | 198998.66   | 630020.80   | 2231666.29   | 0.66 | 24.47  | 84.71   | 249.17  | 807.80   |
| 0.26 | 38809.22   | 151985.51   | 481454.93   | 1801257.23   | 0.67 | 19.97  | 70.89   | 203.75  | 654.80   |
| 0.27 | 31082.06   | 121316.35   | 377982.84   | 1399076.19   | 0.68 | 16.41  | 57.98   | 162.24  | 554.42   |
| 0.28 | 24825.45   | 97857.89    | 305334.23   | 1138146.72   | 0.69 | 13.46  | 47.13   | 133.60  | 454.90   |
| 0.29 | 20340.47   | 80196.58    | 243220.25   | 873566.61    | 0.70 | 10.98  | 37.95   | 105.71  | 340.15   |
| 0.30 | 16477.26   | 63874.25    | 192435.37   | 698527.49    | 0.71 | 9.09   | 30.86   | 85.39   | 273.10   |
| 0.31 | 13225.39   | 51191.25    | 158386.91   | 550612.79    | 0.72 | 7.40   | 25.12   | 69.60   | 216.96   |
| 0.32 | 11056.78   | 42485.17    | 128170.43   | 466249.64    | 0.73 | 5.99   | 20.17   | 55.21   | 175.90   |
| 0.33 | 9192.55    | 34944.85    | 107312.71   | 390459.25    | 0.74 | 4.84   | 16.44   | 44.18   | 141.96   |
| 0.34 | 7577.22    | 28923.41    | 89515.75    | 305607.49    | 0.75 | 3.94   | 12.94   | 34.98   | 110.83   |
| 0.35 | 6372.40    | 23863.11    | 71854.97    | 248507.51    | 0.76 | 3.21   | 10.30   | 28.08   | 84.01    |
| 0.36 | 5215.39    | 20075.56    | 60278.38    | 208107.41    | 0.77 | 2.59   | 8.10    | 22.26   | 67.62    |
| 0.37 | 4319.55    | 16400.99    | 50415.75    | 168002.48    | 0.78 | 2.07   | 6.34    | 17.37   | 52.91    |
| 0.38 | 3633.69    | 13429.05    | 41814.29    | 145096.26    | 0.79 | 1.64   | 5.04    | 13.15   | 40.84    |
| 0.39 | 3022.18    | 11322.07    | 33209.34    | 120661.20    | 0.80 | 1.30   | 3.89    | 10.12   | 30.73    |
| 0.40 | 2546.43    | 9552.50     | 27986.98    | 99935.20     | 0.81 | 1.02   | 2.99    | 8.00    | 23.72    |
| 0.41 | 2110.05    | 7891.77     | 23595.93    | 82975.97     | 0.82 | 0.79   | 2.27    | 6.04    | 17.43    |
| 0.42 | 1765.80    | 6535.99     | 20164.35    | 68253.46     | 0.83 | 0.63   | 1.74    | 4.54    | 12.81    |
| 0.43 | 1469.74    | 5502.92     | 16189.34    | 56814.22     | 0.84 | 0.48   | 1.32    | 3.29    | 9.42     |
| 0.44 | 1220.15    | 4518.56     | 13547.10    | 46876.27     | 0.85 | 0.37   | 0.97    | 2.45    | 6.93     |
| 0.45 | 999.57     | 3735.65     | 11279.97    | 37370.90     | 0.86 | 0.28   | 0.72    | 1.73    | 4.99     |
| 0.46 | 827.97     | 3170.70     | 9458.37     | 30902.31     | 0.87 | 0.21   | 0.52    | 1.24    | 3.39     |
| 0.47 | 696.83     | 2673.39     | 7948.21     | 26509.31     | 0.88 | 0.15   | 0.37    | 0.87    | 2.39     |
| 0.48 | 595.44     | 2220.94     | 6645.16     | 22007.14     | 0.89 | 0.11   | 0.26    | 0.62    | 1.60     |
| 0.49 | 506.05     | 1875.20     | 5595.21     | 18483.98     | 0.90 | 0.08   | 0.18    | 0.42    | 1.03     |
| 0.50 | 430.05     | 1585.52     | 4659.91     | 15475.87     |      |        |         |         |          |

Table S99: Critical values for detector  $\hat{H}_d^m$  and IM-OLS estimation in a model with intercept. The number of integrated regressors is 3 and the highest power of  $x_{kt}$  is 3.

| m    | 90 %       | 95 %       | 97,5 %      | 99 %        | m    | 90 %   | 95 %   | 97,5 %  | 99 %    |
|------|------------|------------|-------------|-------------|------|--------|--------|---------|---------|
| 0.10 | 2072868.03 | 7279564.47 | 19957092.47 | 61786902.11 | 0.51 | 117.29 | 393.57 | 1081.57 | 3268.82 |
| 0.11 | 1319266.06 | 4559886.75 | 12904729.01 | 41701761.95 | 0.52 | 97.62  | 328.04 | 901.22  | 2654.45 |
| 0.12 | 876312.14  | 2959415.19 | 8444485.01  | 26264037.71 | 0.53 | 81.27  | 268.72 | 737.56  | 2226.42 |
| 0.13 | 590106.18  | 1971284.41 | 5655119.17  | 18101368.30 | 0.54 | 68.52  | 227.33 | 610.06  | 1870.00 |
| 0.14 | 388830.16  | 1354256.58 | 3865884.77  | 12661467.56 | 0.55 | 57.75  | 191.12 | 521.17  | 1561.63 |
| 0.15 | 276813.88  | 958870.98  | 2801430.36  | 8977063.49  | 0.56 | 48.55  | 156.77 | 420.30  | 1265.83 |
| 0.16 | 200090.83  | 693252.72  | 1968503.56  | 6405601.00  | 0.57 | 42.04  | 131.10 | 353.73  | 1065.08 |
| 0.17 | 144422.72  | 514406.68  | 1407564.68  | 4581090.82  | 0.58 | 35.24  | 109.59 | 298.07  | 919.61  |
| 0.18 | 108527.96  | 377668.65  | 1070994.76  | 3343643.37  | 0.59 | 29.40  | 91.20  | 249.55  | 758.34  |
| 0.19 | 80400.55   | 278776.68  | 807225.58   | 2586976.98  | 0.60 | 24.74  | 76.43  | 206.44  | 633.16  |
| 0.20 | 60872.60   | 214095.61  | 594147.69   | 1910246.36  | 0.61 | 20.71  | 64.97  | 173.69  | 533.80  |
| 0.21 | 46228.65   | 162327.77  | 453621.06   | 1518710.84  | 0.62 | 17.40  | 54.49  | 145.33  | 435.75  |
| 0.22 | 35461.32   | 125299.51  | 357020.73   | 1110584.98  | 0.63 | 14.60  | 44.36  | 115.60  | 350.03  |
| 0.23 | 27399.03   | 96782.80   | 277227.97   | 877425.94   | 0.64 | 12.07  | 36.23  | 95.99   | 291.16  |
| 0.24 | 21496.04   | 76338.48   | 214957.72   | 696581.17   | 0.65 | 10.11  | 29.79  | 78.21   | 233.40  |
| 0.25 | 17245.51   | 60430.03   | 171195.95   | 549613.33   | 0.66 | 8.47   | 24.59  | 64.14   | 184.81  |
| 0.26 | 13536.27   | 48596.14   | 134069.30   | 426878.07   | 0.67 | 7.04   | 20.34  | 51.85   | 151.86  |
| 0.27 | 10770.54   | 38469.85   | 107755.84   | 341471.02   | 0.68 | 5.82   | 16.35  | 41.95   | 122.81  |
| 0.28 | 8669.09    | 31169.68   | 84824.74    | 276116.74   | 0.69 | 4.81   | 13.59  | 35.00   | 95.70   |
| 0.29 | 7040.60    | 24335.35   | 68112.99    | 209822.40   | 0.70 | 4.02   | 11.25  | 28.56   | 80.05   |
| 0.30 | 5592.06    | 19787.51   | 56744.51    | 169941.37   | 0.71 | 3.35   | 9.00   | 22.83   | 64.22   |
| 0.31 | 4566.59    | 15938.80   | 44581.50    | 146734.19   | 0.72 | 2.77   | 7.22   | 18.26   | 51.39   |
| 0.32 | 3768.86    | 12924.07   | 37773.17    | 116713.26   | 0.73 | 2.27   | 5.99   | 15.21   | 42.56   |
| 0.33 | 3064.95    | 10686.36   | 30758.96    | 94226.80    | 0.74 | 1.87   | 4.81   | 11.61   | 34.09   |
| 0.34 | 2465.48    | 8574.17    | 25063.62    | 73372.56    | 0.75 | 1.54   | 3.85   | 9.21    | 26.51   |
| 0.35 | 2080.58    | 7101.45    | 20172.59    | 62487.81    | 0.76 | 1.25   | 3.08   | 7.48    | 21.09   |
| 0.36 | 1691.64    | 5979.52    | 17094.35    | 51542.94    | 0.77 | 1.01   | 2.49   | 5.83    | 16.60   |
| 0.37 | 1443.58    | 4918.47    | 14108.64    | 42861.65    | 0.78 | 0.82   | 1.98   | 4.57    | 12.04   |
| 0.38 | 1167.78    | 4024.07    | 11593.55    | 36087.64    | 0.79 | 0.65   | 1.54   | 3.61    | 9.56    |
| 0.39 | 996.66     | 3373.94    | 9498.83     | 29568.96    | 0.80 | 0.52   | 1.22   | 2.77    | 7.15    |
| 0.40 | 820.89     | 2817.87    | 7662.59     | 24611.70    | 0.81 | 0.42   | 0.94   | 2.11    | 5.47    |
| 0.41 | 683.77     | 2329.71    | 6352.38     | 20431.52    | 0.82 | 0.32   | 0.73   | 1.65    | 4.24    |
| 0.42 | 569.68     | 1919.55    | 5256.99     | 17044.03    | 0.83 | 0.26   | 0.54   | 1.23    | 3.13    |
| 0.43 | 472.75     | 1608.61    | 4387.07     | 13724.64    | 0.84 | 0.20   | 0.41   | 0.90    | 2.25    |
| 0.44 | 400.11     | 1352.53    | 3702.37     | 11685.79    | 0.85 | 0.16   | 0.31   | 0.66    | 1.68    |
| 0.45 | 330.02     | 1128.76    | 3075.67     | 9654.05     | 0.86 | 0.14   | 0.23   | 0.46    | 1.15    |
| 0.46 | 279.37     | 942.73     | 2525.84     | 7762.33     | 0.87 | 0.12   | 0.18   | 0.32    | 0.81    |
| 0.47 | 235.67     | 786.85     | 2108.33     | 6659.38     | 0.88 | 0.10   | 0.15   | 0.23    | 0.55    |
| 0.48 | 197.50     | 668.58     | 1790.33     | 5523.49     | 0.89 | 0.10   | 0.13   | 0.18    | 0.36    |
| 0.49 | 165.68     | 565.67     | 1549.18     | 4712.01     | 0.90 | 0.09   | 0.11   | 0.15    | 0.24    |
| 0.50 | 138.31     | 469.72     | 1343.09     | 3930.35     |      |        |        |         |         |

Table S100: Critical values for detector  $\hat{H}_d^m$  and FM-OLS and D-OLS estimation in a model with intercept and linear trend. The number of integrated regressors is 3 and the highest power of  $x_{kt}$  is 3.

| m    | 90 %       | 95 %        | 97,5 %      | 99 %         | m    | 90 %   | 95 %    | 97,5 %  | 99 %     |
|------|------------|-------------|-------------|--------------|------|--------|---------|---------|----------|
| 0.10 | 6671346.68 | 24078961.39 | 71698634.39 | 256314304.60 | 0.51 | 356.94 | 1274.40 | 3700.64 | 12303.33 |
| 0.11 | 4151595.58 | 15378526.30 | 46037465.53 | 154857763.95 | 0.52 | 298.38 | 1049.67 | 3102.42 | 10409.42 |
| 0.12 | 2754939.71 | 10000355.23 | 30555054.90 | 105492512.71 | 0.53 | 252.17 | 885.14  | 2581.33 | 8569.93  |
| 0.13 | 1790528.62 | 6739365.26  | 20241270.19 | 70636473.89  | 0.54 | 212.07 | 756.62  | 2186.05 | 7288.15  |
| 0.14 | 1221784.78 | 4587035.56  | 13831096.82 | 48403234.93  | 0.55 | 177.67 | 642.25  | 1832.16 | 6130.75  |
| 0.15 | 857234.84  | 3218852.23  | 9878371.99  | 35011559.19  | 0.56 | 151.61 | 521.01  | 1511.69 | 5184.91  |
| 0.16 | 616247.15  | 2288771.90  | 7038104.45  | 25293785.65  | 0.57 | 128.05 | 437.13  | 1254.56 | 4086.36  |
| 0.17 | 447219.86  | 1680711.18  | 5064381.03  | 17714191.75  | 0.58 | 106.35 | 364.81  | 1037.11 | 3342.88  |
| 0.18 | 334292.54  | 1266768.47  | 3873886.52  | 12474447.16  | 0.59 | 89.57  | 308.48  | 909.39  | 2788.84  |
| 0.19 | 250092.18  | 944595.39   | 2799590.84  | 9884891.84   | 0.60 | 75.87  | 258.11  | 746.36  | 2260.28  |
| 0.20 | 188507.76  | 718222.99   | 2102591.04  | 7720952.51   | 0.61 | 63.40  | 217.17  | 614.44  | 1966.79  |
| 0.21 | 145721.65  | 541888.96   | 1632828.06  | 5508547.07   | 0.62 | 53.56  | 180.52  | 520.51  | 1643.26  |
| 0.22 | 112673.61  | 420782.45   | 1284507.73  | 4212958.04   | 0.63 | 44.23  | 149.11  | 427.70  | 1349.64  |
| 0.23 | 85312.13   | 325437.36   | 973400.68   | 3328316.59   | 0.64 | 35.99  | 123.03  | 351.25  | 1100.11  |
| 0.24 | 67339.10   | 255010.46   | 776982.11   | 2635573.21   | 0.65 | 30.17  | 101.57  | 290.26  | 902.43   |
| 0.25 | 53354.77   | 201927.56   | 618683.61   | 2165998.68   | 0.66 | 25.02  | 83.24   | 236.99  | 725.22   |
| 0.26 | 41931.69   | 156726.53   | 484482.14   | 1744709.02   | 0.67 | 20.43  | 67.73   | 196.32  | 597.66   |
| 0.27 | 33297.38   | 121062.56   | 376564.29   | 1382491.20   | 0.68 | 16.90  | 55.12   | 158.93  | 501.78   |
| 0.28 | 26729.22   | 100095.66   | 293053.04   | 1081736.62   | 0.69 | 13.82  | 44.97   | 126.23  | 419.88   |
| 0.29 | 21575.59   | 80300.68    | 236597.17   | 838806.35    | 0.70 | 11.37  | 36.41   | 101.47  | 334.36   |
| 0.30 | 17268.91   | 64098.40    | 190899.90   | 657866.84    | 0.71 | 9.39   | 29.16   | 81.21   | 266.11   |
| 0.31 | 14064.54   | 51604.45    | 152282.15   | 523525.55    | 0.72 | 7.74   | 23.55   | 66.07   | 209.87   |
| 0.32 | 11399.99   | 41813.58    | 125462.90   | 446428.99    | 0.73 | 6.37   | 19.11   | 52.27   | 169.21   |
| 0.33 | 9397.67    | 34885.12    | 105233.27   | 364930.01    | 0.74 | 5.18   | 15.32   | 41.58   | 132.66   |
| 0.34 | 7762.09    | 28502.36    | 86276.85    | 291737.44    | 0.75 | 4.19   | 12.18   | 32.87   | 100.98   |
| 0.35 | 6414.66    | 22929.12    | 69786.03    | 240968.80    | 0.76 | 3.39   | 9.89    | 26.59   | 81.24    |
| 0.36 | 5343.32    | 19029.02    | 57248.25    | 193401.99    | 0.77 | 2.77   | 7.87    | 20.65   | 65.61    |
| 0.37 | 4447.11    | 15969.28    | 46446.97    | 156304.80    | 0.78 | 2.22   | 6.12    | 16.49   | 50.10    |
| 0.38 | 3654.92    | 13435.37    | 39339.90    | 128961.76    | 0.79 | 1.79   | 4.85    | 12.53   | 37.79    |
| 0.39 | 3066.65    | 11277.89    | 31463.20    | 108112.57    | 0.80 | 1.42   | 3.78    | 9.60    | 28.70    |
| 0.40 | 2540.30    | 9386.37     | 26420.54    | 88618.67     | 0.81 | 1.12   | 2.90    | 7.34    | 21.43    |
| 0.41 | 2089.16    | 7746.01     | 22138.56    | 72749.36     | 0.82 | 0.89   | 2.23    | 5.50    | 15.71    |
| 0.42 | 1753.40    | 6411.01     | 18707.98    | 62618.26     | 0.83 | 0.70   | 1.70    | 4.11    | 11.62    |
| 0.43 | 1449.83    | 5276.93     | 15711.85    | 53274.35     | 0.84 | 0.54   | 1.29    | 3.02    | 8.38     |
| 0.44 | 1208.15    | 4418.51     | 13093.98    | 42340.13     | 0.85 | 0.42   | 0.97    | 2.19    | 6.17     |
| 0.45 | 1002.50    | 3653.58     | 10930.18    | 35521.63     | 0.86 | 0.32   | 0.72    | 1.61    | 4.27     |
| 0.46 | 829.26     | 3034.90     | 9306.07     | 28936.58     | 0.87 | 0.24   | 0.53    | 1.15    | 2.99     |
| 0.47 | 698.09     | 2637.53     | 7767.83     | 24732.02     | 0.88 | 0.18   | 0.38    | 0.83    | 2.04     |
| 0.48 | 591.47     | 2194.54     | 6376.08     | 21233.65     | 0.89 | 0.13   | 0.27    | 0.58    | 1.44     |
| 0.49 | 500.73     | 1852.18     | 5326.35     | 17883.86     | 0.90 | 0.09   | 0.19    | 0.40    | 0.95     |
| 0.50 | 423.59     | 1538.15     | 4410.51     | 14450.19     |      |        |         |         |          |

Table S101: Critical values for detector  $\hat{H}_d^m$  and IM-OLS estimation in a model with intercept and linear trend. The number of integrated regressors is 3 and the highest power of  $x_{kt}$  is 3.

## 2.4 Number of I(1) regressors: 4

| m    | 90 %    | 95 %    | 97,5 %  | 99 %    | m    | 90 % | 95 %  | 97,5 % | 99 %  |
|------|---------|---------|---------|---------|------|------|-------|--------|-------|
| 0.10 | 1328.31 | 2191.16 | 3260.74 | 5107.97 | 0.51 | 6.32 | 10.08 | 14.77  | 22.24 |
| 0.11 | 1060.50 | 1732.07 | 2592.90 | 4012.27 | 0.52 | 5.67 | 9.07  | 13.19  | 20.22 |
| 0.12 | 859.91  | 1403.18 | 2091.79 | 3275.96 | 0.53 | 5.12 | 8.09  | 11.80  | 18.12 |
| 0.13 | 701.45  | 1152.63 | 1724.17 | 2692.56 | 0.54 | 4.54 | 7.24  | 10.62  | 16.14 |
| 0.14 | 579.31  | 943.56  | 1429.79 | 2228.09 | 0.55 | 4.10 | 6.50  | 9.47   | 14.30 |
| 0.15 | 484.68  | 794.99  | 1195.10 | 1869.19 | 0.56 | 3.69 | 5.83  | 8.45   | 12.72 |
| 0.16 | 407.74  | 673.41  | 1003.57 | 1564.16 | 0.57 | 3.29 | 5.25  | 7.61   | 11.27 |
| 0.17 | 344.78  | 567.91  | 851.60  | 1308.58 | 0.58 | 2.93 | 4.65  | 6.75   | 10.06 |
| 0.18 | 294.10  | 484.08  | 724.39  | 1113.89 | 0.59 | 2.63 | 4.16  | 6.02   | 9.03  |
| 0.19 | 252.13  | 409.69  | 618.15  | 973.97  | 0.60 | 2.37 | 3.74  | 5.40   | 7.96  |
| 0.20 | 217.86  | 354.57  | 526.42  | 826.62  | 0.61 | 2.12 | 3.34  | 4.78   | 7.09  |
| 0.21 | 190.53  | 310.67  | 455.74  | 705.49  | 0.62 | 1.88 | 2.97  | 4.28   | 6.32  |
| 0.22 | 166.52  | 270.15  | 399.67  | 619.04  | 0.63 | 1.68 | 2.61  | 3.78   | 5.64  |
| 0.23 | 145.66  | 236.22  | 354.30  | 543.34  | 0.64 | 1.49 | 2.32  | 3.34   | 4.96  |
| 0.24 | 126.96  | 209.01  | 309.30  | 481.60  | 0.65 | 1.31 | 2.05  | 2.93   | 4.36  |
| 0.25 | 111.44  | 183.24  | 273.45  | 424.62  | 0.66 | 1.15 | 1.82  | 2.61   | 3.84  |
| 0.26 | 98.41   | 161.15  | 244.19  | 376.75  | 0.67 | 1.03 | 1.59  | 2.28   | 3.37  |
| 0.27 | 87.64   | 142.98  | 213.97  | 329.72  | 0.68 | 0.91 | 1.39  | 1.99   | 2.99  |
| 0.28 | 77.54   | 127.39  | 188.27  | 292.07  | 0.69 | 0.80 | 1.24  | 1.75   | 2.62  |
| 0.29 | 68.24   | 112.62  | 169.41  | 259.62  | 0.70 | 0.70 | 1.09  | 1.55   | 2.28  |
| 0.30 | 59.88   | 98.67   | 146.84  | 227.33  | 0.71 | 0.61 | 0.95  | 1.35   | 1.99  |
| 0.31 | 53.77   | 87.70   | 130.49  | 203.55  | 0.72 | 0.53 | 0.82  | 1.16   | 1.72  |
| 0.32 | 48.04   | 78.50   | 116.11  | 181.18  | 0.73 | 0.46 | 0.71  | 1.01   | 1.49  |
| 0.33 | 43.11   | 70.09   | 102.80  | 161.08  | 0.74 | 0.41 | 0.62  | 0.87   | 1.30  |
| 0.34 | 38.25   | 62.33   | 92.86   | 145.81  | 0.75 | 0.36 | 0.53  | 0.75   | 1.12  |
| 0.35 | 34.22   | 55.33   | 82.43   | 128.86  | 0.76 | 0.31 | 0.46  | 0.65   | 0.95  |
| 0.36 | 30.61   | 49.37   | 73.64   | 114.41  | 0.77 | 0.27 | 0.40  | 0.55   | 0.80  |
| 0.37 | 27.40   | 44.26   | 66.30   | 101.25  | 0.78 | 0.23 | 0.34  | 0.47   | 0.67  |
| 0.38 | 24.65   | 39.59   | 58.78   | 89.16   | 0.79 | 0.21 | 0.30  | 0.40   | 0.57  |
| 0.39 | 22.20   | 35.72   | 53.03   | 80.47   | 0.80 | 0.18 | 0.26  | 0.34   | 0.49  |
| 0.40 | 20.08   | 32.47   | 47.83   | 72.21   | 0.81 | 0.16 | 0.23  | 0.30   | 0.41  |
| 0.41 | 18.15   | 28.98   | 42.81   | 64.97   | 0.82 | 0.15 | 0.20  | 0.26   | 0.35  |
| 0.42 | 16.23   | 26.29   | 38.88   | 58.75   | 0.83 | 0.14 | 0.18  | 0.23   | 0.32  |
| 0.43 | 14.62   | 23.62   | 34.71   | 53.71   | 0.84 | 0.13 | 0.17  | 0.21   | 0.28  |
| 0.44 | 13.23   | 21.26   | 31.52   | 47.83   | 0.85 | 0.12 | 0.16  | 0.20   | 0.26  |
| 0.45 | 11.84   | 19.03   | 27.96   | 43.02   | 0.86 | 0.12 | 0.15  | 0.19   | 0.25  |
| 0.46 | 10.65   | 17.11   | 25.11   | 38.38   | 0.87 | 0.11 | 0.14  | 0.18   | 0.24  |
| 0.47 | 9.53    | 15.45   | 22.54   | 34.59   | 0.88 | 0.11 | 0.14  | 0.18   | 0.23  |
| 0.48 | 8.56    | 13.98   | 20.49   | 31.35   | 0.89 | 0.11 | 0.14  | 0.17   | 0.23  |
| 0.49 | 7.74    | 12.55   | 18.29   | 27.92   | 0.90 | 0.10 | 0.14  | 0.17   | 0.23  |
| 0.50 | 7.00    | 11.22   | 16.46   | 24.85   |      |      |       |        |       |

Table S102: Critical values for detector  $\hat{H}_d^m$  and FM-OLS and D-OLS estimation in a model with intercept. The number of integrated regressors is 4 and the highest power of  $x_{kt}$  is 1.

| m    | 90 %    | 95 %    | 97,5 %  | 99 %     | m    | 90 %  | 95 %  | 97,5 % | 99 %  |
|------|---------|---------|---------|----------|------|-------|-------|--------|-------|
| 0.10 | 2653.84 | 4542.57 | 7021.14 | 11468.71 | 0.51 | 12.54 | 20.76 | 31.34  | 49.90 |
| 0.11 | 2120.56 | 3623.66 | 5572.71 | 9190.33  | 0.52 | 11.34 | 18.59 | 28.33  | 44.72 |
| 0.12 | 1715.85 | 2914.80 | 4519.49 | 7293.93  | 0.53 | 10.22 | 16.73 | 25.41  | 40.34 |
| 0.13 | 1403.17 | 2377.44 | 3737.46 | 6017.25  | 0.54 | 9.18  | 15.15 | 22.85  | 36.46 |
| 0.14 | 1156.42 | 1948.73 | 3060.29 | 5162.25  | 0.55 | 8.24  | 13.54 | 20.45  | 32.61 |
| 0.15 | 956.73  | 1602.25 | 2588.90 | 4206.68  | 0.56 | 7.43  | 12.13 | 18.35  | 28.93 |
| 0.16 | 809.30  | 1373.60 | 2156.86 | 3539.95  | 0.57 | 6.69  | 10.92 | 16.30  | 25.41 |
| 0.17 | 686.77  | 1172.68 | 1823.46 | 2992.07  | 0.58 | 5.98  | 9.72  | 14.51  | 22.80 |
| 0.18 | 585.20  | 992.51  | 1556.94 | 2545.49  | 0.59 | 5.33  | 8.70  | 13.00  | 20.22 |
| 0.19 | 500.16  | 852.29  | 1328.71 | 2170.68  | 0.60 | 4.77  | 7.79  | 11.58  | 18.06 |
| 0.20 | 437.80  | 741.81  | 1137.70 | 1860.81  | 0.61 | 4.28  | 6.94  | 10.24  | 15.98 |
| 0.21 | 377.08  | 648.70  | 998.31  | 1625.41  | 0.62 | 3.81  | 6.21  | 9.07   | 14.21 |
| 0.22 | 326.07  | 559.25  | 862.00  | 1404.26  | 0.63 | 3.41  | 5.51  | 8.12   | 12.64 |
| 0.23 | 285.52  | 487.04  | 755.69  | 1239.00  | 0.64 | 3.05  | 4.90  | 7.31   | 11.10 |
| 0.24 | 251.29  | 429.30  | 662.44  | 1088.26  | 0.65 | 2.70  | 4.38  | 6.52   | 9.89  |
| 0.25 | 222.59  | 381.10  | 585.55  | 948.53   | 0.66 | 2.42  | 3.87  | 5.71   | 8.71  |
| 0.26 | 196.76  | 335.11  | 517.39  | 835.30   | 0.67 | 2.13  | 3.43  | 5.01   | 7.72  |
| 0.27 | 174.33  | 294.75  | 454.76  | 734.25   | 0.68 | 1.89  | 3.01  | 4.41   | 6.72  |
| 0.28 | 154.21  | 262.67  | 398.91  | 647.70   | 0.69 | 1.66  | 2.65  | 3.88   | 5.88  |
| 0.29 | 136.14  | 231.06  | 356.77  | 579.63   | 0.70 | 1.46  | 2.32  | 3.39   | 5.19  |
| 0.30 | 121.42  | 204.79  | 316.81  | 512.36   | 0.71 | 1.28  | 2.03  | 2.97   | 4.59  |
| 0.31 | 107.83  | 182.77  | 281.43  | 463.69   | 0.72 | 1.13  | 1.77  | 2.58   | 3.98  |
| 0.32 | 96.61   | 163.61  | 251.09  | 413.83   | 0.73 | 0.99  | 1.54  | 2.26   | 3.41  |
| 0.33 | 85.81   | 146.89  | 226.32  | 367.73   | 0.74 | 0.86  | 1.35  | 1.96   | 2.95  |
| 0.34 | 76.61   | 131.16  | 202.50  | 322.84   | 0.75 | 0.75  | 1.18  | 1.71   | 2.55  |
| 0.35 | 68.38   | 116.10  | 179.71  | 289.43   | 0.76 | 0.65  | 1.02  | 1.48   | 2.23  |
| 0.36 | 61.27   | 103.38  | 160.29  | 259.87   | 0.77 | 0.56  | 0.88  | 1.27   | 1.91  |
| 0.37 | 54.80   | 92.33   | 142.02  | 228.72   | 0.78 | 0.48  | 0.75  | 1.09   | 1.63  |
| 0.38 | 49.28   | 82.66   | 126.56  | 204.90   | 0.79 | 0.41  | 0.64  | 0.93   | 1.38  |
| 0.39 | 44.23   | 74.13   | 112.99  | 184.93   | 0.80 | 0.35  | 0.55  | 0.78   | 1.16  |
| 0.40 | 39.79   | 66.61   | 102.75  | 166.37   | 0.81 | 0.29  | 0.46  | 0.66   | 0.97  |
| 0.41 | 35.89   | 60.27   | 91.92   | 151.93   | 0.82 | 0.25  | 0.39  | 0.55   | 0.82  |
| 0.42 | 32.34   | 54.11   | 82.58   | 134.18   | 0.83 | 0.21  | 0.32  | 0.46   | 0.68  |
| 0.43 | 29.24   | 48.95   | 73.74   | 118.97   | 0.84 | 0.17  | 0.27  | 0.38   | 0.55  |
| 0.44 | 26.34   | 43.97   | 67.11   | 106.61   | 0.85 | 0.14  | 0.22  | 0.31   | 0.46  |
| 0.45 | 23.59   | 39.50   | 60.58   | 96.12    | 0.86 | 0.11  | 0.18  | 0.25   | 0.37  |
| 0.46 | 21.23   | 35.65   | 54.22   | 86.09    | 0.87 | 0.09  | 0.14  | 0.20   | 0.30  |
| 0.47 | 19.26   | 32.10   | 48.37   | 77.49    | 0.88 | 0.07  | 0.11  | 0.16   | 0.23  |
| 0.48 | 17.33   | 28.64   | 43.65   | 69.21    | 0.89 | 0.05  | 0.09  | 0.12   | 0.18  |
| 0.49 | 15.46   | 25.80   | 39.22   | 61.88    | 0.90 | 0.04  | 0.06  | 0.09   | 0.14  |
| 0.50 | 13.88   | 23.13   | 34.97   | 55.26    |      |       |       |        |       |

Table S103: Critical values for detector  $\hat{H}_d^m$  and IM-OLS estimation in a model with intercept. The number of integrated regressors is 4 and the highest power of  $x_{kt}$  is 1.



| m    | 90 %     | 95 %     | 97,5 %   | 99 %     | m    | 90 %  | 95 %  | 97,5 % | 99 %  |
|------|----------|----------|----------|----------|------|-------|-------|--------|-------|
| 0.10 | 14703.80 | 23465.04 | 33938.28 | 51658.12 | 0.51 | 14.83 | 23.17 | 33.40  | 49.91 |
| 0.11 | 10686.42 | 16953.41 | 24893.66 | 37369.91 | 0.52 | 13.14 | 20.55 | 29.60  | 44.39 |
| 0.12 | 7816.74  | 12273.25 | 17940.13 | 27205.38 | 0.53 | 11.56 | 18.09 | 26.04  | 39.16 |
| 0.13 | 5865.26  | 9313.86  | 13583.42 | 20706.81 | 0.54 | 10.24 | 16.02 | 23.09  | 33.54 |
| 0.14 | 4548.22  | 7189.27  | 10462.95 | 15633.38 | 0.55 | 9.00  | 13.98 | 20.12  | 30.12 |
| 0.15 | 3578.46  | 5693.95  | 8300.58  | 12582.64 | 0.56 | 7.98  | 12.39 | 17.87  | 26.52 |
| 0.16 | 2822.69  | 4510.48  | 6571.44  | 9944.68  | 0.57 | 7.05  | 10.86 | 15.69  | 23.06 |
| 0.17 | 2261.03  | 3598.24  | 5251.56  | 7981.09  | 0.58 | 6.17  | 9.62  | 13.61  | 20.17 |
| 0.18 | 1825.69  | 2924.61  | 4285.17  | 6483.75  | 0.59 | 5.43  | 8.40  | 12.10  | 17.80 |
| 0.19 | 1488.53  | 2370.34  | 3479.31  | 5245.62  | 0.60 | 4.79  | 7.44  | 10.54  | 15.42 |
| 0.20 | 1218.46  | 1946.14  | 2835.76  | 4327.22  | 0.61 | 4.21  | 6.52  | 9.28   | 13.63 |
| 0.21 | 1009.04  | 1608.79  | 2379.06  | 3572.23  | 0.62 | 3.72  | 5.72  | 8.11   | 12.12 |
| 0.22 | 832.97   | 1334.31  | 1962.33  | 2960.23  | 0.63 | 3.22  | 5.01  | 7.14   | 10.45 |
| 0.23 | 705.34   | 1124.32  | 1644.59  | 2500.72  | 0.64 | 2.81  | 4.38  | 6.27   | 9.21  |
| 0.24 | 592.98   | 943.23   | 1369.67  | 2055.57  | 0.65 | 2.46  | 3.82  | 5.43   | 7.93  |
| 0.25 | 504.58   | 807.81   | 1177.50  | 1742.10  | 0.66 | 2.15  | 3.31  | 4.74   | 6.98  |
| 0.26 | 426.51   | 675.48   | 982.50   | 1446.93  | 0.67 | 1.87  | 2.86  | 4.09   | 5.99  |
| 0.27 | 363.92   | 574.92   | 836.35   | 1249.77  | 0.68 | 1.62  | 2.51  | 3.55   | 5.13  |
| 0.28 | 311.36   | 493.21   | 719.01   | 1091.54  | 0.69 | 1.41  | 2.16  | 3.08   | 4.49  |
| 0.29 | 266.77   | 423.27   | 623.38   | 941.05   | 0.70 | 1.23  | 1.87  | 2.65   | 3.87  |
| 0.30 | 230.54   | 364.36   | 534.25   | 804.75   | 0.71 | 1.05  | 1.61  | 2.28   | 3.30  |
| 0.31 | 200.34   | 314.73   | 460.68   | 689.70   | 0.72 | 0.90  | 1.38  | 1.95   | 2.86  |
| 0.32 | 173.69   | 272.85   | 401.89   | 604.01   | 0.73 | 0.78  | 1.18  | 1.67   | 2.48  |
| 0.33 | 150.08   | 237.73   | 346.75   | 523.36   | 0.74 | 0.67  | 1.01  | 1.43   | 2.09  |
| 0.34 | 131.46   | 207.40   | 299.81   | 459.39   | 0.75 | 0.57  | 0.86  | 1.21   | 1.75  |
| 0.35 | 113.22   | 179.91   | 260.60   | 396.21   | 0.76 | 0.49  | 0.74  | 1.03   | 1.46  |
| 0.36 | 99.05    | 156.47   | 226.99   | 337.70   | 0.77 | 0.41  | 0.62  | 0.86   | 1.23  |
| 0.37 | 86.72    | 138.18   | 198.81   | 294.55   | 0.78 | 0.34  | 0.51  | 0.72   | 1.03  |
| 0.38 | 75.74    | 120.97   | 175.69   | 259.62   | 0.79 | 0.29  | 0.43  | 0.60   | 0.86  |
| 0.39 | 66.94    | 105.83   | 153.80   | 227.35   | 0.80 | 0.24  | 0.36  | 0.49   | 0.70  |
| 0.40 | 59.15    | 93.26    | 134.45   | 200.92   | 0.81 | 0.20  | 0.30  | 0.41   | 0.58  |
| 0.41 | 52.00    | 82.07    | 119.18   | 177.46   | 0.82 | 0.17  | 0.25  | 0.34   | 0.48  |
| 0.42 | 45.80    | 71.75    | 104.05   | 155.55   | 0.83 | 0.15  | 0.21  | 0.28   | 0.39  |
| 0.43 | 40.34    | 63.21    | 90.89    | 136.43   | 0.84 | 0.13  | 0.17  | 0.23   | 0.31  |
| 0.44 | 35.54    | 55.68    | 80.29    | 119.53   | 0.85 | 0.12  | 0.15  | 0.19   | 0.25  |
| 0.45 | 31.31    | 49.33    | 71.28    | 106.95   | 0.86 | 0.11  | 0.13  | 0.16   | 0.21  |
| 0.46 | 27.69    | 43.15    | 62.44    | 94.51    | 0.87 | 0.10  | 0.12  | 0.15   | 0.19  |
| 0.47 | 24.31    | 38.20    | 55.55    | 83.50    | 0.88 | 0.09  | 0.11  | 0.13   | 0.17  |
| 0.48 | 21.61    | 33.82    | 49.07    | 73.08    | 0.89 | 0.09  | 0.11  | 0.13   | 0.15  |
| 0.49 | 19.09    | 29.95    | 43.23    | 64.56    | 0.90 | 0.08  | 0.10  | 0.12   | 0.15  |
| 0.50 | 16.84    | 26.24    | 37.81    | 56.68    |      |       |       |        |       |

Table S104: Critical values for detector  $\hat{H}_d^m$  and FM-OLS and D-OLS estimation in a model with intercept and linear trend. The number of integrated regressors is 4 and the highest power of  $x_{kt}$  is 1.

| m    | 90 %     | 95 %     | 97,5 %   | 99 %      | m    | 90 %  | 95 %  | 97,5 % | 99 %   |
|------|----------|----------|----------|-----------|------|-------|-------|--------|--------|
| 0.10 | 28754.10 | 47521.58 | 70924.14 | 111109.99 | 0.51 | 29.54 | 47.74 | 71.34  | 112.86 |
| 0.11 | 20700.71 | 34138.60 | 51180.87 | 80555.29  | 0.52 | 25.98 | 42.31 | 62.57  | 97.96  |
| 0.12 | 15323.72 | 24968.85 | 37302.19 | 58715.17  | 0.53 | 23.02 | 37.14 | 55.79  | 86.04  |
| 0.13 | 11522.64 | 18970.06 | 28225.87 | 44625.66  | 0.54 | 20.26 | 32.81 | 49.11  | 76.07  |
| 0.14 | 8899.08  | 14582.21 | 21622.25 | 33956.22  | 0.55 | 17.96 | 28.99 | 43.09  | 67.14  |
| 0.15 | 6946.47  | 11514.28 | 17006.81 | 26391.43  | 0.56 | 15.87 | 25.59 | 37.90  | 59.88  |
| 0.16 | 5523.59  | 9124.02  | 13738.79 | 21152.46  | 0.57 | 14.04 | 22.60 | 33.46  | 52.25  |
| 0.17 | 4446.01  | 7280.52  | 10910.49 | 17196.88  | 0.58 | 12.29 | 19.89 | 29.26  | 45.61  |
| 0.18 | 3539.77  | 5885.62  | 8784.80  | 13840.41  | 0.59 | 10.77 | 17.34 | 25.65  | 39.19  |
| 0.19 | 2903.52  | 4758.80  | 7224.13  | 11412.88  | 0.60 | 9.53  | 15.32 | 22.53  | 34.13  |
| 0.20 | 2376.78  | 3936.22  | 5833.60  | 9400.79   | 0.61 | 8.37  | 13.41 | 19.46  | 29.64  |
| 0.21 | 1975.42  | 3271.32  | 4947.10  | 7646.37   | 0.62 | 7.37  | 11.73 | 17.17  | 25.94  |
| 0.22 | 1653.39  | 2732.54  | 4144.35  | 6481.23   | 0.63 | 6.50  | 10.30 | 14.95  | 22.83  |
| 0.23 | 1390.75  | 2293.39  | 3477.31  | 5502.01   | 0.64 | 5.72  | 8.97  | 13.07  | 19.86  |
| 0.24 | 1175.34  | 1950.04  | 2925.84  | 4635.29   | 0.65 | 4.98  | 7.86  | 11.42  | 17.43  |
| 0.25 | 1001.39  | 1651.57  | 2464.71  | 3897.16   | 0.66 | 4.33  | 6.82  | 9.96   | 15.17  |
| 0.26 | 840.91   | 1383.92  | 2103.71  | 3233.80   | 0.67 | 3.78  | 5.97  | 8.67   | 13.07  |
| 0.27 | 718.21   | 1186.73  | 1786.39  | 2813.72   | 0.68 | 3.28  | 5.19  | 7.60   | 11.48  |
| 0.28 | 620.19   | 1006.25  | 1529.68  | 2434.04   | 0.69 | 2.86  | 4.54  | 6.58   | 9.86   |
| 0.29 | 533.01   | 874.73   | 1320.67  | 2080.65   | 0.70 | 2.48  | 3.94  | 5.73   | 8.53   |
| 0.30 | 459.55   | 755.80   | 1136.07  | 1799.15   | 0.71 | 2.14  | 3.40  | 4.93   | 7.39   |
| 0.31 | 397.53   | 649.70   | 983.00   | 1553.43   | 0.72 | 1.85  | 2.91  | 4.26   | 6.29   |
| 0.32 | 344.66   | 566.13   | 847.81   | 1312.95   | 0.73 | 1.60  | 2.51  | 3.62   | 5.45   |
| 0.33 | 297.54   | 492.42   | 730.91   | 1135.70   | 0.74 | 1.38  | 2.16  | 3.10   | 4.69   |
| 0.34 | 259.98   | 425.55   | 644.99   | 997.63    | 0.75 | 1.18  | 1.85  | 2.65   | 4.01   |
| 0.35 | 225.15   | 372.01   | 563.40   | 871.66    | 0.76 | 1.00  | 1.58  | 2.26   | 3.35   |
| 0.36 | 196.51   | 323.43   | 485.15   | 760.00    | 0.77 | 0.85  | 1.33  | 1.92   | 2.83   |
| 0.37 | 171.31   | 282.51   | 426.58   | 665.36    | 0.78 | 0.72  | 1.12  | 1.60   | 2.39   |
| 0.38 | 150.31   | 247.36   | 374.76   | 586.05    | 0.79 | 0.61  | 0.94  | 1.34   | 2.01   |
| 0.39 | 132.93   | 217.34   | 329.11   | 511.09    | 0.80 | 0.52  | 0.79  | 1.11   | 1.67   |
| 0.40 | 117.00   | 191.01   | 285.67   | 450.63    | 0.81 | 0.43  | 0.65  | 0.92   | 1.38   |
| 0.41 | 103.35   | 169.59   | 253.40   | 394.49    | 0.82 | 0.35  | 0.54  | 0.77   | 1.12   |
| 0.42 | 91.42    | 148.63   | 223.04   | 348.95    | 0.83 | 0.29  | 0.44  | 0.63   | 0.92   |
| 0.43 | 80.39    | 131.12   | 194.77   | 309.56    | 0.84 | 0.24  | 0.36  | 0.51   | 0.76   |
| 0.44 | 70.62    | 115.08   | 173.49   | 271.51    | 0.85 | 0.19  | 0.29  | 0.41   | 0.60   |
| 0.45 | 62.32    | 101.75   | 151.94   | 238.63    | 0.86 | 0.15  | 0.23  | 0.33   | 0.48   |
| 0.46 | 54.76    | 89.58    | 135.07   | 212.04    | 0.87 | 0.12  | 0.18  | 0.26   | 0.38   |
| 0.47 | 48.52    | 78.99    | 118.89   | 189.30    | 0.88 | 0.09  | 0.14  | 0.20   | 0.29   |
| 0.48 | 43.22    | 69.54    | 105.71   | 165.11    | 0.89 | 0.07  | 0.11  | 0.15   | 0.22   |
| 0.49 | 38.01    | 61.58    | 91.96    | 145.34    | 0.90 | 0.05  | 0.08  | 0.11   | 0.17   |
| 0.50 | 33.60    | 54.50    | 81.32    | 128.69    |      |       |       |        |        |

Table S105: Critical values for detector  $\hat{H}_d^m$  and IM-OLS estimation in a model with intercept and linear trend. The number of integrated regressors is 4 and the highest power of  $x_{kt}$  is 1.

| m    | 90 %     | 95 %     | 97,5 %   | 99 %      | m    | 90 %  | 95 %  | 97,5 % | 99 %   |
|------|----------|----------|----------|-----------|------|-------|-------|--------|--------|
| 0.10 | 16269.42 | 40780.40 | 88784.09 | 213838.22 | 0.51 | 15.58 | 30.52 | 57.44  | 124.69 |
| 0.11 | 11878.21 | 29791.77 | 62841.51 | 149906.66 | 0.52 | 13.83 | 27.48 | 51.12  | 106.99 |
| 0.12 | 8697.64  | 21951.78 | 46187.61 | 112731.16 | 0.53 | 12.25 | 24.03 | 44.03  | 90.21  |
| 0.13 | 6711.35  | 17024.55 | 35446.72 | 83920.26  | 0.54 | 10.78 | 21.22 | 38.56  | 79.25  |
| 0.14 | 5094.59  | 12714.77 | 27421.81 | 63545.40  | 0.55 | 9.45  | 18.41 | 33.69  | 67.97  |
| 0.15 | 3993.67  | 9924.36  | 21671.72 | 49661.83  | 0.56 | 8.36  | 16.25 | 29.38  | 59.81  |
| 0.16 | 3093.82  | 7659.04  | 16537.69 | 39300.12  | 0.57 | 7.37  | 14.13 | 25.39  | 51.20  |
| 0.17 | 2498.74  | 6004.98  | 12804.72 | 30604.35  | 0.58 | 6.44  | 12.26 | 22.35  | 45.25  |
| 0.18 | 2011.76  | 4857.29  | 10563.44 | 24557.15  | 0.59 | 5.64  | 10.69 | 19.41  | 38.95  |
| 0.19 | 1640.18  | 3978.40  | 8445.26  | 19690.01  | 0.60 | 4.99  | 9.33  | 16.61  | 34.71  |
| 0.20 | 1339.66  | 3217.04  | 6831.32  | 15802.37  | 0.61 | 4.36  | 8.17  | 14.66  | 29.46  |
| 0.21 | 1127.67  | 2700.54  | 5762.26  | 12921.30  | 0.62 | 3.83  | 7.14  | 12.64  | 25.62  |
| 0.22 | 925.08   | 2217.77  | 4755.54  | 10637.68  | 0.63 | 3.36  | 6.21  | 10.87  | 21.46  |
| 0.23 | 780.66   | 1855.30  | 3863.37  | 9060.97   | 0.64 | 2.91  | 5.34  | 9.31   | 18.76  |
| 0.24 | 656.89   | 1536.53  | 3251.67  | 7455.30   | 0.65 | 2.53  | 4.69  | 8.10   | 16.09  |
| 0.25 | 555.64   | 1280.74  | 2726.73  | 6174.39   | 0.66 | 2.20  | 4.05  | 7.03   | 13.62  |
| 0.26 | 470.71   | 1075.78  | 2257.62  | 5218.20   | 0.67 | 1.90  | 3.49  | 5.95   | 11.70  |
| 0.27 | 400.44   | 917.52   | 1888.72  | 4428.56   | 0.68 | 1.67  | 2.99  | 5.13   | 10.22  |
| 0.28 | 343.93   | 784.31   | 1616.97  | 3717.00   | 0.69 | 1.44  | 2.57  | 4.46   | 8.42   |
| 0.29 | 295.55   | 665.33   | 1380.25  | 3181.10   | 0.70 | 1.25  | 2.21  | 3.78   | 7.17   |
| 0.30 | 253.62   | 569.99   | 1179.32  | 2723.63   | 0.71 | 1.08  | 1.90  | 3.19   | 6.00   |
| 0.31 | 218.71   | 494.52   | 1009.55  | 2335.46   | 0.72 | 0.94  | 1.63  | 2.72   | 5.03   |
| 0.32 | 188.21   | 426.08   | 881.48   | 1995.11   | 0.73 | 0.79  | 1.38  | 2.29   | 4.16   |
| 0.33 | 164.59   | 362.96   | 738.41   | 1734.16   | 0.74 | 0.68  | 1.19  | 1.95   | 3.56   |
| 0.34 | 143.46   | 318.08   | 648.58   | 1526.58   | 0.75 | 0.58  | 1.00  | 1.61   | 2.96   |
| 0.35 | 124.81   | 278.59   | 551.63   | 1270.76   | 0.76 | 0.49  | 0.85  | 1.35   | 2.42   |
| 0.36 | 109.85   | 240.16   | 480.31   | 1099.23   | 0.77 | 0.41  | 0.70  | 1.12   | 1.98   |
| 0.37 | 95.25    | 208.35   | 420.24   | 919.61    | 0.78 | 0.34  | 0.58  | 0.92   | 1.65   |
| 0.38 | 83.05    | 178.75   | 364.14   | 807.74    | 0.79 | 0.29  | 0.48  | 0.77   | 1.34   |
| 0.39 | 73.09    | 155.59   | 312.27   | 689.20    | 0.80 | 0.24  | 0.40  | 0.62   | 1.08   |
| 0.40 | 64.55    | 136.71   | 268.45   | 593.78    | 0.81 | 0.21  | 0.33  | 0.50   | 0.87   |
| 0.41 | 56.35    | 118.68   | 233.09   | 515.91    | 0.82 | 0.18  | 0.28  | 0.41   | 0.70   |
| 0.42 | 49.34    | 104.16   | 205.34   | 432.14    | 0.83 | 0.16  | 0.23  | 0.34   | 0.56   |
| 0.43 | 43.20    | 90.36    | 174.58   | 374.61    | 0.84 | 0.14  | 0.20  | 0.28   | 0.44   |
| 0.44 | 37.75    | 78.03    | 155.13   | 328.97    | 0.85 | 0.13  | 0.17  | 0.24   | 0.36   |
| 0.45 | 33.67    | 68.67    | 134.79   | 285.10    | 0.86 | 0.12  | 0.16  | 0.21   | 0.30   |
| 0.46 | 29.58    | 60.61    | 117.15   | 252.48    | 0.87 | 0.11  | 0.14  | 0.19   | 0.27   |
| 0.47 | 25.99    | 52.76    | 100.51   | 220.22    | 0.88 | 0.10  | 0.14  | 0.18   | 0.24   |
| 0.48 | 22.97    | 45.71    | 87.57    | 193.28    | 0.89 | 0.10  | 0.13  | 0.17   | 0.23   |
| 0.49 | 20.39    | 40.97    | 77.11    | 167.72    | 0.90 | 0.10  | 0.13  | 0.16   | 0.21   |
| 0.50 | 17.85    | 35.17    | 66.83    | 144.38    |      |       |       |        |        |

Table S106: Critical values for detector  $\hat{H}_d^m$  and FM-OLS and D-OLS estimation in a model with intercept. The number of integrated regressors is 4 and the highest power of  $x_{kt}$  is 2.

| m    | 90 %     | 95 %     | 97,5 %    | 99 %      | m    | 90 %  | 95 %  | 97,5 % | 99 %   |
|------|----------|----------|-----------|-----------|------|-------|-------|--------|--------|
| 0.10 | 37319.64 | 95827.68 | 217914.97 | 546987.84 | 0.51 | 35.31 | 74.05 | 147.29 | 326.33 |
| 0.11 | 26895.38 | 69936.50 | 157933.35 | 398703.33 | 0.52 | 31.08 | 65.43 | 127.66 | 291.85 |
| 0.12 | 19851.31 | 52442.63 | 116688.00 | 296544.33 | 0.53 | 27.45 | 57.24 | 111.31 | 244.45 |
| 0.13 | 15183.89 | 39614.81 | 87868.27  | 222330.31 | 0.54 | 23.94 | 50.22 | 96.55  | 208.38 |
| 0.14 | 11579.47 | 30006.74 | 66821.36  | 172528.90 | 0.55 | 21.14 | 44.03 | 83.70  | 182.59 |
| 0.15 | 9163.87  | 23408.91 | 52411.99  | 134242.51 | 0.56 | 18.50 | 38.06 | 73.18  | 159.31 |
| 0.16 | 7285.47  | 18444.16 | 40431.50  | 101726.58 | 0.57 | 16.27 | 33.15 | 63.07  | 138.18 |
| 0.17 | 5709.16  | 14546.35 | 32343.26  | 80728.17  | 0.58 | 14.30 | 28.97 | 54.69  | 121.65 |
| 0.18 | 4526.96  | 11574.00 | 25263.25  | 63689.64  | 0.59 | 12.57 | 25.50 | 47.61  | 105.60 |
| 0.19 | 3702.31  | 9104.14  | 19901.53  | 49546.54  | 0.60 | 11.07 | 22.31 | 41.66  | 89.90  |
| 0.20 | 3071.40  | 7483.53  | 16256.88  | 39254.57  | 0.61 | 9.78  | 19.48 | 36.30  | 77.62  |
| 0.21 | 2546.52  | 6230.17  | 13293.04  | 32760.42  | 0.62 | 8.54  | 16.94 | 31.66  | 66.45  |
| 0.22 | 2085.93  | 4963.25  | 11090.50  | 26443.15  | 0.63 | 7.48  | 14.82 | 27.61  | 57.79  |
| 0.23 | 1767.61  | 4254.83  | 9266.96   | 21838.39  | 0.64 | 6.56  | 12.93 | 23.66  | 49.21  |
| 0.24 | 1511.38  | 3623.90  | 7849.65   | 18341.69  | 0.65 | 5.72  | 11.14 | 20.46  | 41.57  |
| 0.25 | 1282.44  | 3086.59  | 6665.33   | 16033.54  | 0.66 | 4.98  | 9.55  | 17.39  | 35.88  |
| 0.26 | 1082.90  | 2602.85  | 5655.78   | 13603.87  | 0.67 | 4.35  | 8.27  | 14.75  | 30.45  |
| 0.27 | 927.68   | 2181.56  | 4749.86   | 11600.32  | 0.68 | 3.77  | 7.09  | 12.65  | 26.54  |
| 0.28 | 784.18   | 1852.29  | 4024.14   | 9472.51   | 0.69 | 3.27  | 6.16  | 10.94  | 22.46  |
| 0.29 | 675.65   | 1602.02  | 3397.04   | 7956.71   | 0.70 | 2.83  | 5.37  | 9.52   | 19.19  |
| 0.30 | 576.09   | 1355.08  | 2886.27   | 6768.75   | 0.71 | 2.43  | 4.62  | 8.06   | 15.90  |
| 0.31 | 496.88   | 1151.65  | 2480.30   | 5631.83   | 0.72 | 2.10  | 3.94  | 6.84   | 13.81  |
| 0.32 | 425.71   | 992.46   | 2109.57   | 4922.24   | 0.73 | 1.80  | 3.34  | 5.83   | 11.69  |
| 0.33 | 370.41   | 851.01   | 1836.59   | 4252.63   | 0.74 | 1.55  | 2.85  | 4.88   | 9.75   |
| 0.34 | 322.80   | 743.10   | 1583.96   | 3766.75   | 0.75 | 1.32  | 2.40  | 4.11   | 8.19   |
| 0.35 | 283.41   | 649.99   | 1383.52   | 3258.66   | 0.76 | 1.13  | 2.01  | 3.39   | 6.87   |
| 0.36 | 247.78   | 561.91   | 1200.63   | 2794.95   | 0.77 | 0.94  | 1.69  | 2.87   | 5.60   |
| 0.37 | 215.76   | 489.75   | 1041.48   | 2452.83   | 0.78 | 0.79  | 1.41  | 2.36   | 4.44   |
| 0.38 | 187.46   | 426.41   | 891.29    | 2146.10   | 0.79 | 0.66  | 1.17  | 1.94   | 3.59   |
| 0.39 | 163.31   | 364.01   | 762.27    | 1854.64   | 0.80 | 0.55  | 0.97  | 1.58   | 2.94   |
| 0.40 | 144.13   | 324.02   | 671.46    | 1566.96   | 0.81 | 0.46  | 0.79  | 1.31   | 2.40   |
| 0.41 | 126.36   | 284.39   | 575.82    | 1335.39   | 0.82 | 0.38  | 0.66  | 1.06   | 1.94   |
| 0.42 | 110.33   | 245.07   | 488.57    | 1132.87   | 0.83 | 0.31  | 0.53  | 0.86   | 1.52   |
| 0.43 | 95.53    | 213.46   | 427.38    | 990.83    | 0.84 | 0.25  | 0.43  | 0.69   | 1.20   |
| 0.44 | 83.51    | 185.08   | 372.70    | 852.48    | 0.85 | 0.20  | 0.34  | 0.54   | 0.93   |
| 0.45 | 73.99    | 160.53   | 325.29    | 746.44    | 0.86 | 0.16  | 0.27  | 0.42   | 0.72   |
| 0.46 | 65.96    | 142.38   | 289.79    | 634.82    | 0.87 | 0.13  | 0.21  | 0.33   | 0.56   |
| 0.47 | 58.01    | 125.50   | 252.81    | 556.82    | 0.88 | 0.10  | 0.16  | 0.25   | 0.42   |
| 0.48 | 51.24    | 110.41   | 220.39    | 497.11    | 0.89 | 0.07  | 0.12  | 0.19   | 0.31   |
| 0.49 | 45.26    | 97.17    | 193.22    | 427.64    | 0.90 | 0.05  | 0.09  | 0.14   | 0.23   |
| 0.50 | 40.17    | 85.30    | 168.11    | 374.09    |      |       |       |        |        |

Table S107: Critical values for detector  $\hat{H}_d^m$  and IM-OLS estimation in a model with intercept. The number of integrated regressors is 4 and the highest power of  $x_{kt}$  is 2.

| m    | 90 %     | 95 %     | 97,5 %    | 99 %      | m    | 90 %  | 95 %  | 97,5 % | 99 %   |
|------|----------|----------|-----------|-----------|------|-------|-------|--------|--------|
| 0.10 | 40022.28 | 75382.66 | 136019.37 | 289591.34 | 0.51 | 26.74 | 45.82 | 76.91  | 148.81 |
| 0.11 | 28739.35 | 53696.95 | 97985.11  | 197649.13 | 0.52 | 23.41 | 40.83 | 67.23  | 127.56 |
| 0.12 | 20686.16 | 39048.76 | 70558.52  | 148410.43 | 0.53 | 20.52 | 35.59 | 58.60  | 108.21 |
| 0.13 | 15497.88 | 29144.47 | 52685.88  | 108059.03 | 0.54 | 18.12 | 31.25 | 51.33  | 93.52  |
| 0.14 | 11701.73 | 21737.07 | 38939.13  | 80618.01  | 0.55 | 15.80 | 27.33 | 44.38  | 80.58  |
| 0.15 | 9077.18  | 17090.30 | 30421.55  | 63109.83  | 0.56 | 13.90 | 23.84 | 38.50  | 68.88  |
| 0.16 | 7051.54  | 13173.73 | 23574.19  | 49313.19  | 0.57 | 12.24 | 20.69 | 33.27  | 60.05  |
| 0.17 | 5547.50  | 10247.41 | 18137.92  | 37487.75  | 0.58 | 10.55 | 18.07 | 29.28  | 53.49  |
| 0.18 | 4461.12  | 8279.95  | 14845.38  | 30971.53  | 0.59 | 9.23  | 15.77 | 25.24  | 45.74  |
| 0.19 | 3579.21  | 6603.90  | 11728.15  | 24048.33  | 0.60 | 8.03  | 13.77 | 21.99  | 40.62  |
| 0.20 | 2921.09  | 5345.06  | 9579.00   | 19639.48  | 0.61 | 6.97  | 12.04 | 19.20  | 35.15  |
| 0.21 | 2406.33  | 4422.19  | 7874.20   | 15885.27  | 0.62 | 6.14  | 10.37 | 16.64  | 30.46  |
| 0.22 | 1974.85  | 3623.80  | 6496.48   | 12995.94  | 0.63 | 5.34  | 9.00  | 14.29  | 25.25  |
| 0.23 | 1652.06  | 3013.29  | 5254.10   | 10833.56  | 0.64 | 4.59  | 7.75  | 12.26  | 21.77  |
| 0.24 | 1358.96  | 2504.09  | 4342.55   | 8913.08   | 0.65 | 3.97  | 6.65  | 10.58  | 18.67  |
| 0.25 | 1141.92  | 2068.08  | 3667.18   | 7265.76   | 0.66 | 3.43  | 5.78  | 9.18   | 16.20  |
| 0.26 | 949.88   | 1719.57  | 3004.21   | 6331.37   | 0.67 | 2.96  | 4.97  | 7.85   | 13.65  |
| 0.27 | 803.96   | 1452.46  | 2566.66   | 5247.74   | 0.68 | 2.57  | 4.24  | 6.67   | 11.89  |
| 0.28 | 685.39   | 1244.07  | 2155.48   | 4457.76   | 0.69 | 2.21  | 3.64  | 5.76   | 10.01  |
| 0.29 | 580.73   | 1050.09  | 1835.48   | 3734.61   | 0.70 | 1.88  | 3.14  | 4.89   | 8.43   |
| 0.30 | 498.41   | 893.82   | 1569.28   | 3245.87   | 0.71 | 1.62  | 2.66  | 4.16   | 7.13   |
| 0.31 | 425.17   | 767.85   | 1344.30   | 2752.78   | 0.72 | 1.39  | 2.28  | 3.55   | 6.03   |
| 0.32 | 366.96   | 665.55   | 1171.07   | 2311.08   | 0.73 | 1.18  | 1.94  | 2.99   | 4.97   |
| 0.33 | 315.05   | 571.50   | 994.03    | 2000.54   | 0.74 | 1.00  | 1.63  | 2.50   | 4.16   |
| 0.34 | 272.81   | 490.73   | 856.08    | 1772.18   | 0.75 | 0.85  | 1.36  | 2.09   | 3.48   |
| 0.35 | 234.55   | 427.14   | 729.72    | 1482.76   | 0.76 | 0.72  | 1.15  | 1.73   | 2.85   |
| 0.36 | 204.25   | 366.37   | 634.33    | 1264.25   | 0.77 | 0.59  | 0.95  | 1.43   | 2.36   |
| 0.37 | 176.87   | 318.21   | 543.92    | 1071.75   | 0.78 | 0.49  | 0.78  | 1.18   | 1.93   |
| 0.38 | 153.90   | 274.52   | 471.98    | 948.47    | 0.79 | 0.41  | 0.65  | 0.99   | 1.61   |
| 0.39 | 135.42   | 241.00   | 405.10    | 796.36    | 0.80 | 0.33  | 0.53  | 0.79   | 1.29   |
| 0.40 | 117.64   | 207.56   | 352.73    | 686.13    | 0.81 | 0.27  | 0.43  | 0.65   | 1.03   |
| 0.41 | 102.06   | 179.77   | 302.74    | 590.91    | 0.82 | 0.22  | 0.35  | 0.52   | 0.85   |
| 0.42 | 89.57    | 157.72   | 262.76    | 511.25    | 0.83 | 0.18  | 0.28  | 0.42   | 0.67   |
| 0.43 | 77.93    | 136.66   | 227.04    | 444.42    | 0.84 | 0.15  | 0.22  | 0.32   | 0.52   |
| 0.44 | 67.08    | 118.94   | 200.69    | 378.85    | 0.85 | 0.13  | 0.18  | 0.26   | 0.40   |
| 0.45 | 59.58    | 104.57   | 175.19    | 335.27    | 0.86 | 0.11  | 0.15  | 0.20   | 0.30   |
| 0.46 | 51.99    | 91.43    | 154.01    | 294.77    | 0.87 | 0.10  | 0.13  | 0.16   | 0.24   |
| 0.47 | 45.75    | 79.34    | 133.19    | 258.19    | 0.88 | 0.09  | 0.11  | 0.14   | 0.19   |
| 0.48 | 39.71    | 69.83    | 116.13    | 223.24    | 0.89 | 0.08  | 0.10  | 0.12   | 0.16   |
| 0.49 | 35.17    | 61.04    | 101.29    | 198.68    | 0.90 | 0.08  | 0.09  | 0.11   | 0.14   |
| 0.50 | 30.63    | 52.37    | 89.22     | 171.91    |      |       |       |        |        |

Table S108: Critical values for detector  $\hat{H}_d^m$  and FM-OLS and D-OLS estimation in a model with intercept and linear trend. The number of integrated regressors is 4 and the highest power of  $x_{kt}$  is 2.

| m    | 90 %     | 95 %      | 97,5 %    | 99 %      | m    | 90 %  | 95 %   | 97,5 % | 99 %   |
|------|----------|-----------|-----------|-----------|------|-------|--------|--------|--------|
| 0.10 | 86137.07 | 171924.70 | 324280.25 | 741707.64 | 0.51 | 57.87 | 105.82 | 184.92 | 367.60 |
| 0.11 | 61700.28 | 121402.46 | 229209.06 | 523390.60 | 0.52 | 50.49 | 92.70  | 159.77 | 315.61 |
| 0.12 | 44663.68 | 88651.31  | 167793.15 | 370919.33 | 0.53 | 44.17 | 80.97  | 138.00 | 274.53 |
| 0.13 | 32889.07 | 65432.46  | 123770.54 | 273534.79 | 0.54 | 38.93 | 70.25  | 119.67 | 237.83 |
| 0.14 | 25117.96 | 49430.80  | 92971.04  | 207619.58 | 0.55 | 33.94 | 60.81  | 104.69 | 207.98 |
| 0.15 | 19140.29 | 38264.70  | 72702.53  | 160394.42 | 0.56 | 29.63 | 53.07  | 90.85  | 181.13 |
| 0.16 | 15060.00 | 29584.12  | 55479.69  | 123534.14 | 0.57 | 25.79 | 46.75  | 79.22  | 154.42 |
| 0.17 | 11934.14 | 23094.35  | 43005.00  | 95975.20  | 0.58 | 22.41 | 40.56  | 68.64  | 136.09 |
| 0.18 | 9420.56  | 18482.79  | 33785.63  | 75384.71  | 0.59 | 19.61 | 35.15  | 59.31  | 115.80 |
| 0.19 | 7634.83  | 14636.75  | 26910.46  | 59090.70  | 0.60 | 17.17 | 30.46  | 51.82  | 98.70  |
| 0.20 | 6146.83  | 11837.46  | 21679.97  | 46392.24  | 0.61 | 14.92 | 26.46  | 44.77  | 86.29  |
| 0.21 | 5025.11  | 9728.15   | 17544.78  | 37498.84  | 0.62 | 13.03 | 23.03  | 38.63  | 74.53  |
| 0.22 | 4161.56  | 8023.44   | 14457.75  | 30419.75  | 0.63 | 11.36 | 20.03  | 33.48  | 64.52  |
| 0.23 | 3468.60  | 6632.71   | 12056.13  | 24803.74  | 0.64 | 9.83  | 17.32  | 28.85  | 54.82  |
| 0.24 | 2912.83  | 5558.42   | 10177.48  | 21022.26  | 0.65 | 8.55  | 15.14  | 24.60  | 46.46  |
| 0.25 | 2451.51  | 4630.79   | 8538.11   | 17773.15  | 0.66 | 7.40  | 12.89  | 21.09  | 38.62  |
| 0.26 | 2053.21  | 3949.93   | 7198.31   | 15177.53  | 0.67 | 6.39  | 11.11  | 17.95  | 33.31  |
| 0.27 | 1734.37  | 3256.08   | 5994.39   | 13172.06  | 0.68 | 5.53  | 9.53   | 15.37  | 29.03  |
| 0.28 | 1471.09  | 2760.33   | 5107.10   | 11080.92  | 0.69 | 4.79  | 8.20   | 13.11  | 24.83  |
| 0.29 | 1245.87  | 2370.50   | 4308.25   | 9214.82   | 0.70 | 4.11  | 7.10   | 11.29  | 21.01  |
| 0.30 | 1069.16  | 1999.08   | 3696.35   | 7853.75   | 0.71 | 3.54  | 6.08   | 9.71   | 17.63  |
| 0.31 | 913.39   | 1735.33   | 3160.87   | 6682.47   | 0.72 | 3.01  | 5.17   | 8.31   | 14.92  |
| 0.32 | 787.24   | 1475.84   | 2716.45   | 5778.17   | 0.73 | 2.56  | 4.41   | 7.08   | 12.56  |
| 0.33 | 676.34   | 1285.08   | 2304.17   | 4872.78   | 0.74 | 2.18  | 3.74   | 5.91   | 10.45  |
| 0.34 | 585.00   | 1111.89   | 2025.86   | 4187.49   | 0.75 | 1.86  | 3.12   | 4.94   | 8.89   |
| 0.35 | 508.82   | 964.91    | 1760.42   | 3634.86   | 0.76 | 1.56  | 2.62   | 4.19   | 7.41   |
| 0.36 | 440.29   | 834.88    | 1525.96   | 3105.11   | 0.77 | 1.31  | 2.21   | 3.46   | 6.04   |
| 0.37 | 381.99   | 728.88    | 1295.81   | 2729.75   | 0.78 | 1.09  | 1.82   | 2.84   | 4.97   |
| 0.38 | 331.26   | 627.85    | 1121.66   | 2362.36   | 0.79 | 0.90  | 1.51   | 2.34   | 4.07   |
| 0.39 | 285.77   | 537.04    | 960.95    | 2047.72   | 0.80 | 0.75  | 1.24   | 1.95   | 3.35   |
| 0.40 | 247.45   | 465.26    | 836.85    | 1714.27   | 0.81 | 0.62  | 1.02   | 1.60   | 2.74   |
| 0.41 | 218.25   | 402.99    | 723.20    | 1481.88   | 0.82 | 0.51  | 0.84   | 1.30   | 2.17   |
| 0.42 | 189.07   | 352.02    | 626.61    | 1263.08   | 0.83 | 0.41  | 0.67   | 1.04   | 1.71   |
| 0.43 | 166.44   | 308.68    | 546.72    | 1106.54   | 0.84 | 0.33  | 0.54   | 0.82   | 1.36   |
| 0.44 | 144.83   | 266.54    | 472.21    | 975.75    | 0.85 | 0.26  | 0.43   | 0.64   | 1.04   |
| 0.45 | 126.75   | 232.22    | 409.76    | 877.49    | 0.86 | 0.21  | 0.33   | 0.50   | 0.80   |
| 0.46 | 112.24   | 206.20    | 363.89    | 760.56    | 0.87 | 0.16  | 0.26   | 0.40   | 0.62   |
| 0.47 | 98.07    | 181.44    | 314.42    | 651.74    | 0.88 | 0.12  | 0.20   | 0.30   | 0.47   |
| 0.48 | 86.41    | 159.43    | 274.60    | 563.46    | 0.89 | 0.09  | 0.15   | 0.22   | 0.35   |
| 0.49 | 75.69    | 138.05    | 236.77    | 488.88    | 0.90 | 0.07  | 0.11   | 0.16   | 0.26   |
| 0.50 | 66.15    | 120.13    | 209.53    | 425.37    |      |       |        |        |        |

Table S109: Critical values for detector  $\hat{H}_d^m$  and IM-OLS estimation in a model with intercept and linear trend. The number of integrated regressors is 4 and the highest power of  $x_{kt}$  is 2.

| m    | 90 %       | 95 %       | 97,5 %      | 99 %        | m    | 90 %   | 95 %   | 97,5 %  | 99 %    |
|------|------------|------------|-------------|-------------|------|--------|--------|---------|---------|
| 0.10 | 1463669.64 | 5281778.03 | 16162969.30 | 53476536.56 | 0.51 | 112.72 | 384.02 | 1078.78 | 3156.83 |
| 0.11 | 952379.99  | 3507644.11 | 10326261.65 | 33551768.51 | 0.52 | 94.62  | 320.80 | 900.29  | 2580.13 |
| 0.12 | 648458.22  | 2352012.68 | 6906683.48  | 22628597.49 | 0.53 | 79.67  | 272.44 | 756.32  | 2279.94 |
| 0.13 | 443783.23  | 1605414.02 | 4717135.51  | 15642785.08 | 0.54 | 67.32  | 227.18 | 633.60  | 1850.98 |
| 0.14 | 308451.21  | 1127565.96 | 3350703.17  | 11199392.83 | 0.55 | 55.55  | 187.93 | 515.74  | 1562.02 |
| 0.15 | 219792.31  | 800825.05  | 2413497.40  | 8116815.37  | 0.56 | 46.83  | 156.03 | 432.72  | 1293.08 |
| 0.16 | 159993.98  | 567319.71  | 1711998.58  | 5786191.11  | 0.57 | 39.32  | 129.03 | 351.43  | 1051.71 |
| 0.17 | 118019.93  | 421793.90  | 1245998.18  | 4124846.33  | 0.58 | 32.63  | 106.27 | 288.80  | 873.00  |
| 0.18 | 86117.80   | 306013.72  | 907462.27   | 2999234.12  | 0.59 | 27.13  | 89.87  | 235.36  | 731.99  |
| 0.19 | 67562.67   | 237733.83  | 690944.40   | 2293976.69  | 0.60 | 22.93  | 73.61  | 193.59  | 615.79  |
| 0.20 | 51875.95   | 184949.11  | 538469.09   | 1762092.94  | 0.61 | 19.42  | 62.26  | 161.02  | 504.64  |
| 0.21 | 40268.49   | 145295.98  | 412584.93   | 1325522.67  | 0.62 | 15.98  | 51.09  | 133.86  | 422.41  |
| 0.22 | 32148.68   | 113325.78  | 330453.79   | 1054711.43  | 0.63 | 13.33  | 42.65  | 110.47  | 334.93  |
| 0.23 | 25020.81   | 90669.39   | 263030.05   | 840627.98   | 0.64 | 11.24  | 35.68  | 90.94   | 273.70  |
| 0.24 | 20113.60   | 72628.02   | 207479.12   | 657608.42   | 0.65 | 9.45   | 29.76  | 74.34   | 217.25  |
| 0.25 | 15875.99   | 56551.84   | 164426.67   | 498672.45   | 0.66 | 7.81   | 23.92  | 63.87   | 188.85  |
| 0.26 | 12583.21   | 45157.40   | 127967.38   | 400478.76   | 0.67 | 6.43   | 19.79  | 51.64   | 145.93  |
| 0.27 | 10017.21   | 36600.51   | 105189.81   | 315722.60   | 0.68 | 5.42   | 16.28  | 42.41   | 123.33  |
| 0.28 | 8072.01    | 28633.98   | 84283.94    | 253683.62   | 0.69 | 4.53   | 13.11  | 34.60   | 98.52   |
| 0.29 | 6510.46    | 23571.78   | 67114.54    | 211165.37   | 0.70 | 3.66   | 10.69  | 27.41   | 80.83   |
| 0.30 | 5175.72    | 18996.27   | 53708.11    | 166733.76   | 0.71 | 3.03   | 8.77   | 22.44   | 65.65   |
| 0.31 | 4249.85    | 15669.92   | 44338.72    | 139156.35   | 0.72 | 2.46   | 7.09   | 18.18   | 53.38   |
| 0.32 | 3495.64    | 12786.65   | 36205.05    | 112151.77   | 0.73 | 2.03   | 5.76   | 14.45   | 41.65   |
| 0.33 | 2891.87    | 10525.06   | 29398.37    | 92815.92    | 0.74 | 1.66   | 4.63   | 11.80   | 32.46   |
| 0.34 | 2349.84    | 8429.32    | 24233.83    | 76328.61    | 0.75 | 1.35   | 3.73   | 9.29    | 26.33   |
| 0.35 | 1941.90    | 6997.07    | 20091.42    | 64188.49    | 0.76 | 1.11   | 3.02   | 7.39    | 20.21   |
| 0.36 | 1582.27    | 5752.77    | 16782.28    | 51968.41    | 0.77 | 0.89   | 2.36   | 5.78    | 16.20   |
| 0.37 | 1336.60    | 4718.21    | 14052.88    | 43208.96    | 0.78 | 0.72   | 1.85   | 4.40    | 12.44   |
| 0.38 | 1122.66    | 3901.55    | 11466.57    | 36038.76    | 0.79 | 0.58   | 1.45   | 3.40    | 9.19    |
| 0.39 | 943.53     | 3282.90    | 9367.13     | 29368.37    | 0.80 | 0.46   | 1.13   | 2.64    | 7.30    |
| 0.40 | 764.96     | 2755.34    | 7811.52     | 24291.91    | 0.81 | 0.37   | 0.88   | 2.05    | 5.42    |
| 0.41 | 645.32     | 2291.71    | 6551.30     | 20512.84    | 0.82 | 0.30   | 0.68   | 1.57    | 4.07    |
| 0.42 | 536.63     | 1865.42    | 5376.48     | 16456.30    | 0.83 | 0.24   | 0.51   | 1.17    | 3.09    |
| 0.43 | 443.62     | 1579.80    | 4506.82     | 13986.78    | 0.84 | 0.20   | 0.39   | 0.86    | 2.20    |
| 0.44 | 365.51     | 1302.97    | 3752.27     | 11511.12    | 0.85 | 0.16   | 0.30   | 0.64    | 1.57    |
| 0.45 | 311.92     | 1093.72    | 3122.64     | 9745.46     | 0.86 | 0.14   | 0.24   | 0.46    | 1.11    |
| 0.46 | 264.40     | 921.49     | 2558.43     | 7850.36     | 0.87 | 0.13   | 0.19   | 0.34    | 0.81    |
| 0.47 | 222.43     | 776.04     | 2153.88     | 6783.22     | 0.88 | 0.11   | 0.17   | 0.26    | 0.55    |
| 0.48 | 189.36     | 649.12     | 1825.73     | 5644.47     | 0.89 | 0.11   | 0.15   | 0.21    | 0.38    |
| 0.49 | 159.82     | 545.49     | 1515.67     | 4777.50     | 0.90 | 0.10   | 0.13   | 0.18    | 0.29    |
| 0.50 | 132.79     | 452.10     | 1261.99     | 3857.35     |      |        |        |         |         |

Table S110: Critical values for detector  $\hat{H}_d^m$  and FM-OLS and D-OLS estimation in a model with intercept. The number of integrated regressors is 4 and the highest power of  $x_{kt}$  is 3.

| m    | 90 %       | 95 %        | 97,5 %      | 99 %         | m    | 90 %   | 95 %    | 97,5 %  | 99 %     |
|------|------------|-------------|-------------|--------------|------|--------|---------|---------|----------|
| 0.10 | 4565639.44 | 18091925.62 | 55599967.89 | 200498566.85 | 0.51 | 340.37 | 1237.92 | 3546.24 | 11679.18 |
| 0.11 | 2956733.73 | 11288026.94 | 34875735.96 | 127117837.79 | 0.52 | 289.79 | 1032.87 | 2962.59 | 9868.07  |
| 0.12 | 1995323.00 | 7667686.12  | 23351415.53 | 84892801.34  | 0.53 | 238.86 | 856.28  | 2438.61 | 8206.15  |
| 0.13 | 1349031.41 | 5249482.44  | 16649148.01 | 65419822.40  | 0.54 | 202.02 | 715.30  | 2034.66 | 6829.69  |
| 0.14 | 963323.74  | 3818056.47  | 11893605.28 | 42134968.74  | 0.55 | 171.51 | 592.67  | 1689.38 | 5431.66  |
| 0.15 | 682242.37  | 2677550.69  | 8497370.39  | 29527447.62  | 0.56 | 143.12 | 501.19  | 1433.74 | 4731.58  |
| 0.16 | 500277.67  | 1920866.13  | 6313311.48  | 21067495.29  | 0.57 | 119.00 | 428.82  | 1213.79 | 3913.01  |
| 0.17 | 372601.10  | 1458499.51  | 4685235.98  | 15759900.28  | 0.58 | 97.82  | 354.33  | 1001.29 | 3243.65  |
| 0.18 | 276683.83  | 1091606.32  | 3366090.00  | 11702366.62  | 0.59 | 82.16  | 296.21  | 860.41  | 2720.37  |
| 0.19 | 207239.27  | 797612.36   | 2571406.15  | 8798042.14   | 0.60 | 67.40  | 250.73  | 704.16  | 2325.76  |
| 0.20 | 159662.89  | 624306.20   | 1945959.20  | 6845466.47   | 0.61 | 57.10  | 206.26  | 596.28  | 1872.74  |
| 0.21 | 122831.67  | 470903.73   | 1501820.80  | 5503071.67   | 0.62 | 47.58  | 169.34  | 481.18  | 1513.03  |
| 0.22 | 96395.02   | 365135.68   | 1123045.28  | 4113651.59   | 0.63 | 40.08  | 137.67  | 396.93  | 1269.05  |
| 0.23 | 74966.67   | 284442.30   | 870140.72   | 3121255.99   | 0.64 | 33.55  | 115.10  | 328.76  | 1046.52  |
| 0.24 | 58775.33   | 226677.36   | 686471.73   | 2537499.32   | 0.65 | 27.94  | 94.43   | 269.81  | 873.39   |
| 0.25 | 45868.73   | 174315.83   | 542018.43   | 1958067.45   | 0.66 | 23.29  | 78.40   | 220.34  | 712.01   |
| 0.26 | 36277.62   | 140225.65   | 418302.95   | 1519845.92   | 0.67 | 19.32  | 64.86   | 177.38  | 567.96   |
| 0.27 | 29818.88   | 113941.34   | 337101.47   | 1239889.19   | 0.68 | 15.80  | 53.12   | 144.04  | 466.91   |
| 0.28 | 24200.66   | 93636.08    | 282427.29   | 1012392.81   | 0.69 | 13.08  | 43.85   | 119.87  | 363.28   |
| 0.29 | 19906.05   | 76246.12    | 227398.31   | 814199.02    | 0.70 | 10.88  | 35.42   | 96.65   | 292.50   |
| 0.30 | 15982.94   | 61895.17    | 183949.58   | 633363.72    | 0.71 | 8.99   | 28.41   | 78.07   | 229.41   |
| 0.31 | 12994.66   | 49511.39    | 150175.92   | 514201.66    | 0.72 | 7.32   | 22.98   | 62.83   | 188.49   |
| 0.32 | 10845.18   | 40440.73    | 123906.86   | 418386.14    | 0.73 | 5.95   | 18.90   | 51.19   | 152.38   |
| 0.33 | 8883.62    | 33317.89    | 104182.52   | 342547.95    | 0.74 | 4.79   | 15.05   | 39.80   | 126.81   |
| 0.34 | 7270.99    | 27755.04    | 85634.60    | 287002.63    | 0.75 | 3.90   | 12.20   | 32.25   | 97.06    |
| 0.35 | 5931.92    | 22658.95    | 69244.40    | 235531.89    | 0.76 | 3.13   | 9.50    | 25.46   | 77.51    |
| 0.36 | 4926.63    | 18917.08    | 57675.34    | 193481.77    | 0.77 | 2.54   | 7.48    | 19.84   | 58.00    |
| 0.37 | 4086.75    | 15755.59    | 46613.66    | 160139.07    | 0.78 | 2.03   | 5.92    | 15.47   | 45.06    |
| 0.38 | 3388.69    | 12821.86    | 38342.35    | 134705.87    | 0.79 | 1.63   | 4.66    | 12.01   | 35.55    |
| 0.39 | 2841.55    | 10608.54    | 31510.37    | 112909.58    | 0.80 | 1.30   | 3.65    | 9.32    | 26.81    |
| 0.40 | 2365.51    | 8794.99     | 26985.66    | 90259.51     | 0.81 | 1.03   | 2.82    | 7.15    | 20.39    |
| 0.41 | 1936.80    | 7264.44     | 22132.94    | 76793.43     | 0.82 | 0.82   | 2.18    | 5.48    | 15.60    |
| 0.42 | 1579.82    | 5989.53     | 18675.68    | 63041.18     | 0.83 | 0.65   | 1.64    | 4.11    | 11.78    |
| 0.43 | 1314.41    | 4978.06     | 15220.78    | 51669.38     | 0.84 | 0.50   | 1.23    | 3.05    | 8.72     |
| 0.44 | 1108.25    | 4183.38     | 12454.23    | 42604.14     | 0.85 | 0.39   | 0.93    | 2.31    | 6.29     |
| 0.45 | 923.69     | 3476.77     | 10604.69    | 35825.53     | 0.86 | 0.30   | 0.70    | 1.65    | 4.33     |
| 0.46 | 783.52     | 2924.37     | 8833.79     | 29619.19     | 0.87 | 0.22   | 0.52    | 1.17    | 3.08     |
| 0.47 | 662.31     | 2430.28     | 7251.49     | 24366.55     | 0.88 | 0.17   | 0.38    | 0.82    | 2.17     |
| 0.48 | 569.82     | 2032.44     | 5901.73     | 20170.91     | 0.89 | 0.12   | 0.26    | 0.57    | 1.48     |
| 0.49 | 472.89     | 1733.71     | 4962.06     | 16959.95     | 0.90 | 0.09   | 0.18    | 0.38    | 0.97     |
| 0.50 | 404.63     | 1444.90     | 4207.60     | 14205.70     |      |        |         |         |          |

Table S111: Critical values for detector  $\hat{H}_d^m$  and IM-OLS estimation in a model with intercept. The number of integrated regressors is 4 and the highest power of  $x_{kt}$  is 3.



| m    | 90 %       | 95 %       | 97,5 %      | 99 %        | m    | 90 %   | 95 %   | 97,5 %  | 99 %    |
|------|------------|------------|-------------|-------------|------|--------|--------|---------|---------|
| 0.10 | 2005522.21 | 6885780.05 | 19347271.75 | 61423950.02 | 0.51 | 127.48 | 411.31 | 1135.68 | 3369.06 |
| 0.11 | 1302900.34 | 4452452.92 | 12492364.57 | 39505183.43 | 0.52 | 108.12 | 345.36 | 942.19  | 2655.39 |
| 0.12 | 860936.47  | 2906701.52 | 8365255.29  | 25750252.15 | 0.53 | 90.52  | 289.49 | 794.76  | 2307.03 |
| 0.13 | 585699.84  | 1985417.66 | 5527191.04  | 17880754.87 | 0.54 | 77.35  | 245.32 | 658.38  | 1912.49 |
| 0.14 | 398142.27  | 1372215.03 | 3907425.33  | 12091586.40 | 0.55 | 63.06  | 201.66 | 538.34  | 1643.74 |
| 0.15 | 280154.26  | 963829.19  | 2745135.30  | 9060619.01  | 0.56 | 53.57  | 168.82 | 456.63  | 1334.89 |
| 0.16 | 203512.27  | 690900.42  | 1982288.00  | 6313529.05  | 0.57 | 45.02  | 138.45 | 370.67  | 1096.69 |
| 0.17 | 148378.03  | 496773.84  | 1416945.55  | 4689712.67  | 0.58 | 37.52  | 114.02 | 307.34  | 891.31  |
| 0.18 | 106954.75  | 368267.24  | 1040775.28  | 3215305.68  | 0.59 | 31.92  | 95.19  | 251.68  | 751.34  |
| 0.19 | 82320.01   | 280475.60  | 790480.46   | 2529592.41  | 0.60 | 26.67  | 78.73  | 212.89  | 630.73  |
| 0.20 | 63724.37   | 214016.32  | 586940.55   | 1896420.53  | 0.61 | 22.43  | 67.07  | 171.79  | 518.05  |
| 0.21 | 48753.35   | 165780.61  | 464828.31   | 1451749.82  | 0.62 | 18.78  | 54.97  | 140.87  | 437.55  |
| 0.22 | 38031.38   | 128465.08  | 364265.15   | 1140597.50  | 0.63 | 15.77  | 45.92  | 115.65  | 351.75  |
| 0.23 | 29522.40   | 100945.07  | 284402.90   | 903503.92   | 0.64 | 13.27  | 37.98  | 95.81   | 289.79  |
| 0.24 | 23787.92   | 81172.56   | 226304.55   | 700282.47   | 0.65 | 11.16  | 31.45  | 78.38   | 228.97  |
| 0.25 | 18703.96   | 63974.88   | 178767.63   | 532817.95   | 0.66 | 9.39   | 25.79  | 66.75   | 193.88  |
| 0.26 | 14850.28   | 50486.70   | 137463.03   | 424397.32   | 0.67 | 7.72   | 21.33  | 54.46   | 155.13  |
| 0.27 | 11752.15   | 40320.32   | 110497.42   | 338215.11   | 0.68 | 6.52   | 17.57  | 44.76   | 127.86  |
| 0.28 | 9328.81    | 32272.69   | 88893.89    | 273190.21   | 0.69 | 5.47   | 14.31  | 35.52   | 103.24  |
| 0.29 | 7499.95    | 25911.30   | 72617.18    | 223671.01   | 0.70 | 4.50   | 11.79  | 28.89   | 84.99   |
| 0.30 | 5984.13    | 20670.78   | 57583.17    | 176354.42   | 0.71 | 3.72   | 9.49   | 23.86   | 70.40   |
| 0.31 | 4883.50    | 17036.30   | 47724.44    | 144531.29   | 0.72 | 3.06   | 7.76   | 19.34   | 55.10   |
| 0.32 | 3972.77    | 13798.53   | 38946.30    | 118301.59   | 0.73 | 2.53   | 6.35   | 15.57   | 43.83   |
| 0.33 | 3254.71    | 11396.77   | 31636.44    | 96322.22    | 0.74 | 2.09   | 5.18   | 12.53   | 33.69   |
| 0.34 | 2666.84    | 9236.61    | 25845.27    | 79071.31    | 0.75 | 1.72   | 4.09   | 9.83    | 26.77   |
| 0.35 | 2216.98    | 7661.17    | 21355.71    | 64619.75    | 0.76 | 1.41   | 3.32   | 7.85    | 21.22   |
| 0.36 | 1803.39    | 6334.41    | 17439.71    | 53391.72    | 0.77 | 1.14   | 2.61   | 6.18    | 16.83   |
| 0.37 | 1501.31    | 5168.19    | 14631.50    | 45587.20    | 0.78 | 0.92   | 2.04   | 4.72    | 13.02   |
| 0.38 | 1263.72    | 4231.53    | 12115.63    | 36727.92    | 0.79 | 0.74   | 1.62   | 3.57    | 9.78    |
| 0.39 | 1050.42    | 3530.17    | 10037.21    | 30203.64    | 0.80 | 0.59   | 1.28   | 2.80    | 7.81    |
| 0.40 | 860.44     | 2962.00    | 8337.33     | 25212.94    | 0.81 | 0.47   | 0.99   | 2.17    | 5.70    |
| 0.41 | 725.03     | 2489.17    | 6873.02     | 21209.44    | 0.82 | 0.38   | 0.77   | 1.69    | 4.28    |
| 0.42 | 597.35     | 2039.63    | 5628.93     | 17009.23    | 0.83 | 0.29   | 0.59   | 1.26    | 3.25    |
| 0.43 | 497.35     | 1691.55    | 4694.31     | 14563.37    | 0.84 | 0.23   | 0.45   | 0.93    | 2.31    |
| 0.44 | 408.85     | 1400.57    | 3928.39     | 12047.98    | 0.85 | 0.18   | 0.34   | 0.68    | 1.65    |
| 0.45 | 350.60     | 1169.60    | 3295.89     | 10196.33    | 0.86 | 0.14   | 0.25   | 0.49    | 1.16    |
| 0.46 | 294.48     | 992.79     | 2706.37     | 8331.40     | 0.87 | 0.11   | 0.19   | 0.36    | 0.86    |
| 0.47 | 247.79     | 819.96     | 2302.34     | 7096.54     | 0.88 | 0.10   | 0.14   | 0.24    | 0.58    |
| 0.48 | 209.77     | 698.19     | 1946.21     | 5849.88     | 0.89 | 0.09   | 0.12   | 0.18    | 0.38    |
| 0.49 | 180.08     | 586.53     | 1607.77     | 5014.61     | 0.90 | 0.08   | 0.10   | 0.14    | 0.24    |
| 0.50 | 149.98     | 485.84     | 1319.25     | 3992.32     |      |        |        |         |         |

Table S112: Critical values for detector  $\hat{H}_d^m$  and FM-OLS and D-OLS estimation in a model with intercept and linear trend. The number of integrated regressors is 4 and the highest power of  $x_{kt}$  is 3.

| m    | 90 %       | 95 %        | 97,5 %      | 99 %         | m    | 90 %   | 95 %    | 97,5 %  | 99 %     |
|------|------------|-------------|-------------|--------------|------|--------|---------|---------|----------|
| 0.10 | 5960563.67 | 21774377.77 | 65131774.73 | 222953196.83 | 0.51 | 352.77 | 1230.84 | 3502.25 | 11572.28 |
| 0.11 | 3754852.55 | 14002383.91 | 41941348.40 | 133850898.15 | 0.52 | 300.99 | 1043.24 | 2915.84 | 9734.78  |
| 0.12 | 2535504.17 | 9053573.30  | 27390063.72 | 91589713.36  | 0.53 | 253.52 | 869.59  | 2455.50 | 7741.89  |
| 0.13 | 1693301.87 | 6158980.95  | 18778518.76 | 66027223.53  | 0.54 | 212.87 | 727.27  | 2061.95 | 6451.34  |
| 0.14 | 1182575.77 | 4322056.52  | 13329368.50 | 46339420.45  | 0.55 | 179.01 | 606.56  | 1720.98 | 5447.03  |
| 0.15 | 825268.57  | 3055729.31  | 9079391.26  | 32279773.85  | 0.56 | 149.90 | 506.26  | 1456.21 | 4739.39  |
| 0.16 | 587975.91  | 2150608.55  | 6798050.98  | 22392716.13  | 0.57 | 126.05 | 434.57  | 1202.41 | 3832.05  |
| 0.17 | 440620.59  | 1612482.19  | 4852556.52  | 16260757.30  | 0.58 | 104.36 | 359.17  | 1007.25 | 3225.14  |
| 0.18 | 328709.47  | 1212019.08  | 3542857.10  | 11588485.66  | 0.59 | 87.46  | 300.78  | 868.04  | 2622.62  |
| 0.19 | 244243.91  | 903791.04   | 2655003.31  | 8846024.98   | 0.60 | 72.67  | 249.93  | 707.70  | 2240.79  |
| 0.20 | 184107.13  | 670971.00   | 2070420.20  | 7252522.63   | 0.61 | 61.02  | 204.87  | 592.29  | 1844.65  |
| 0.21 | 139932.57  | 519186.75   | 1580909.81  | 5539788.88   | 0.62 | 51.09  | 169.34  | 474.33  | 1499.67  |
| 0.22 | 108057.59  | 395155.28   | 1168309.72  | 4148536.80   | 0.63 | 42.89  | 138.10  | 383.97  | 1272.12  |
| 0.23 | 84317.76   | 313243.28   | 907296.79   | 3200094.11   | 0.64 | 36.26  | 113.93  | 323.96  | 1017.39  |
| 0.24 | 65145.48   | 241866.45   | 728955.43   | 2558331.14   | 0.65 | 30.59  | 93.69   | 261.94  | 812.51   |
| 0.25 | 50694.63   | 186669.18   | 567912.75   | 2028825.77   | 0.66 | 25.35  | 77.44   | 211.76  | 669.68   |
| 0.26 | 40138.35   | 149605.66   | 436397.17   | 1519099.32   | 0.67 | 21.25  | 64.29   | 174.78  | 544.35   |
| 0.27 | 32898.44   | 118586.96   | 347701.50   | 1212305.86   | 0.68 | 17.70  | 53.60   | 142.67  | 436.15   |
| 0.28 | 26244.61   | 94850.71    | 284522.62   | 951850.50    | 0.69 | 14.56  | 44.89   | 119.21  | 351.52   |
| 0.29 | 21627.21   | 77577.03    | 228228.00   | 757066.59    | 0.70 | 12.14  | 36.99   | 95.22   | 285.28   |
| 0.30 | 17370.07   | 63367.86    | 184092.51   | 596495.20    | 0.71 | 9.96   | 29.72   | 76.99   | 232.47   |
| 0.31 | 14170.59   | 52373.08    | 146431.41   | 504242.90    | 0.72 | 8.12   | 24.00   | 62.90   | 189.59   |
| 0.32 | 11572.15   | 42263.21    | 122148.33   | 405596.49    | 0.73 | 6.68   | 19.30   | 49.51   | 149.60   |
| 0.33 | 9526.51    | 34376.31    | 101258.21   | 332926.66    | 0.74 | 5.44   | 15.41   | 40.59   | 118.08   |
| 0.34 | 7843.33    | 29169.61    | 85420.24    | 273325.74    | 0.75 | 4.41   | 12.42   | 32.75   | 95.16    |
| 0.35 | 6327.56    | 23698.18    | 70481.63    | 223903.61    | 0.76 | 3.57   | 9.72    | 25.85   | 74.21    |
| 0.36 | 5175.73    | 19344.35    | 57938.78    | 185094.34    | 0.77 | 2.90   | 7.66    | 20.11   | 58.62    |
| 0.37 | 4347.13    | 15994.06    | 47822.94    | 155614.58    | 0.78 | 2.32   | 6.05    | 15.32   | 45.36    |
| 0.38 | 3570.07    | 12841.70    | 38267.69    | 129420.49    | 0.79 | 1.90   | 4.74    | 11.97   | 35.88    |
| 0.39 | 2934.34    | 10615.79    | 30933.31    | 104456.10    | 0.80 | 1.51   | 3.70    | 9.45    | 27.08    |
| 0.40 | 2450.63    | 8848.79     | 25495.62    | 85974.95     | 0.81 | 1.21   | 2.91    | 7.19    | 20.45    |
| 0.41 | 2023.17    | 7358.57     | 21473.42    | 70259.42     | 0.82 | 0.97   | 2.29    | 5.45    | 15.29    |
| 0.42 | 1673.42    | 6019.65     | 17726.95    | 58755.77     | 0.83 | 0.76   | 1.73    | 4.11    | 11.29    |
| 0.43 | 1375.84    | 5018.65     | 14657.35    | 49025.50     | 0.84 | 0.59   | 1.32    | 3.03    | 8.29     |
| 0.44 | 1162.76    | 4200.85     | 12167.64    | 39627.36     | 0.85 | 0.45   | 0.99    | 2.24    | 5.90     |
| 0.45 | 958.54     | 3474.23     | 10323.77    | 33061.29     | 0.86 | 0.35   | 0.74    | 1.62    | 4.26     |
| 0.46 | 820.40     | 2950.09     | 8553.57     | 28417.95     | 0.87 | 0.26   | 0.54    | 1.16    | 3.09     |
| 0.47 | 698.93     | 2486.53     | 7117.29     | 23655.94     | 0.88 | 0.19   | 0.39    | 0.83    | 2.12     |
| 0.48 | 588.27     | 2098.81     | 5812.75     | 18894.02     | 0.89 | 0.14   | 0.28    | 0.56    | 1.45     |
| 0.49 | 488.51     | 1746.26     | 4937.98     | 16138.24     | 0.90 | 0.10   | 0.20    | 0.39    | 0.96     |
| 0.50 | 417.21     | 1468.93     | 4180.14     | 13755.10     |      |        |         |         |          |

Table S113: Critical values for detector  $\hat{H}_d^m$  and IM-OLS estimation in a model with intercept and linear trend. The number of integrated regressors is 4 and the highest power of  $x_{kt}$  is 3.

### 3 Detector: $\hat{H}_{sn}^m$

#### 3.1 Number of I(1) regressors: 1

| m    | 90 %      | 95 %      | 97,5 %    | 99 %       | m    | 90 %  | 95 %   | 97,5 % | 99 %   |
|------|-----------|-----------|-----------|------------|------|-------|--------|--------|--------|
| 0.10 | 196594.29 | 393378.57 | 706629.18 | 1337435.88 | 0.51 | 70.37 | 119.36 | 189.25 | 321.97 |
| 0.11 | 129810.51 | 257392.21 | 455938.45 | 839788.72  | 0.52 | 62.33 | 105.32 | 165.57 | 277.86 |
| 0.12 | 88986.70  | 177279.30 | 311930.20 | 597347.35  | 0.53 | 55.19 | 92.59  | 144.83 | 244.12 |
| 0.13 | 62954.87  | 124516.94 | 222946.75 | 407106.33  | 0.54 | 48.96 | 82.53  | 128.44 | 218.81 |
| 0.14 | 45430.96  | 89801.57  | 157833.92 | 297655.85  | 0.55 | 43.32 | 73.37  | 113.43 | 187.88 |
| 0.15 | 33176.77  | 64502.51  | 113523.12 | 210008.17  | 0.56 | 38.48 | 64.89  | 101.43 | 167.83 |
| 0.16 | 25106.67  | 49248.49  | 83692.08  | 158837.82  | 0.57 | 34.15 | 57.77  | 89.41  | 146.47 |
| 0.17 | 19051.78  | 37278.85  | 64915.87  | 118632.43  | 0.58 | 30.38 | 50.81  | 78.80  | 127.54 |
| 0.18 | 14729.70  | 28680.27  | 50397.07  | 92040.35   | 0.59 | 27.03 | 45.30  | 70.81  | 115.14 |
| 0.19 | 11428.32  | 22216.46  | 39224.87  | 71763.73   | 0.60 | 24.14 | 40.33  | 62.77  | 102.43 |
| 0.20 | 9060.58   | 17420.28  | 30130.09  | 55686.06   | 0.61 | 21.43 | 35.81  | 54.88  | 88.13  |
| 0.21 | 7323.53   | 14034.83  | 24367.05  | 45813.79   | 0.62 | 19.07 | 31.58  | 48.07  | 78.73  |
| 0.22 | 5845.90   | 11273.56  | 19285.10  | 35863.14   | 0.63 | 16.86 | 27.68  | 41.98  | 68.85  |
| 0.23 | 4754.62   | 9052.65   | 15460.36  | 28652.64   | 0.64 | 14.82 | 24.21  | 36.75  | 59.85  |
| 0.24 | 3842.77   | 7328.44   | 12754.82  | 23498.94   | 0.65 | 13.20 | 21.64  | 33.02  | 52.82  |
| 0.25 | 3177.86   | 6087.76   | 10470.54  | 19203.77   | 0.66 | 11.62 | 19.18  | 28.93  | 46.74  |
| 0.26 | 2640.92   | 5003.94   | 8507.05   | 15174.59   | 0.67 | 10.25 | 16.84  | 25.26  | 39.49  |
| 0.27 | 2190.09   | 4110.57   | 7034.97   | 12438.25   | 0.68 | 9.11  | 14.86  | 22.40  | 35.37  |
| 0.28 | 1835.01   | 3416.23   | 5737.67   | 10242.57   | 0.69 | 8.03  | 13.04  | 19.50  | 30.14  |
| 0.29 | 1543.79   | 2912.62   | 4879.03   | 8701.19    | 0.70 | 7.09  | 11.40  | 17.00  | 26.72  |
| 0.30 | 1287.70   | 2420.01   | 4038.13   | 7258.84    | 0.71 | 6.26  | 10.01  | 14.80  | 23.06  |
| 0.31 | 1096.52   | 2049.94   | 3391.19   | 6057.02    | 0.72 | 5.54  | 8.79   | 13.01  | 20.59  |
| 0.32 | 943.59    | 1731.00   | 2903.21   | 5282.84    | 0.73 | 4.88  | 7.79   | 11.41  | 17.86  |
| 0.33 | 807.22    | 1470.99   | 2483.71   | 4362.33    | 0.74 | 4.24  | 6.81   | 9.91   | 15.50  |
| 0.34 | 694.40    | 1257.73   | 2119.80   | 3734.35    | 0.75 | 3.72  | 5.90   | 8.59   | 13.10  |
| 0.35 | 592.38    | 1076.27   | 1800.69   | 3226.37    | 0.76 | 3.23  | 5.12   | 7.42   | 11.27  |
| 0.36 | 508.47    | 930.26    | 1530.29   | 2737.45    | 0.77 | 2.83  | 4.48   | 6.45   | 9.66   |
| 0.37 | 443.78    | 795.24    | 1318.45   | 2323.05    | 0.78 | 2.44  | 3.84   | 5.57   | 8.42   |
| 0.38 | 380.81    | 683.70    | 1123.06   | 1967.94    | 0.79 | 2.09  | 3.29   | 4.78   | 7.24   |
| 0.39 | 333.46    | 592.73    | 963.84    | 1684.70    | 0.80 | 1.82  | 2.83   | 4.09   | 6.17   |
| 0.40 | 289.95    | 513.35    | 829.60    | 1441.66    | 0.81 | 1.55  | 2.42   | 3.53   | 5.31   |
| 0.41 | 252.71    | 445.39    | 718.68    | 1245.57    | 0.82 | 1.32  | 2.07   | 2.98   | 4.54   |
| 0.42 | 219.91    | 388.96    | 623.54    | 1071.46    | 0.83 | 1.12  | 1.74   | 2.50   | 3.76   |
| 0.43 | 192.36    | 338.23    | 547.73    | 939.63     | 0.84 | 0.94  | 1.47   | 2.10   | 3.13   |
| 0.44 | 168.71    | 295.20    | 474.63    | 812.81     | 0.85 | 0.79  | 1.20   | 1.72   | 2.55   |
| 0.45 | 147.19    | 260.41    | 416.05    | 709.28     | 0.86 | 0.65  | 1.00   | 1.43   | 2.13   |
| 0.46 | 129.96    | 227.45    | 364.32    | 612.31     | 0.87 | 0.53  | 0.83   | 1.17   | 1.73   |
| 0.47 | 115.42    | 197.69    | 317.20    | 536.67     | 0.88 | 0.43  | 0.67   | 0.96   | 1.41   |
| 0.48 | 100.81    | 172.85    | 279.46    | 485.42     | 0.89 | 0.34  | 0.53   | 0.76   | 1.11   |
| 0.49 | 89.00     | 154.40    | 244.46    | 418.09     | 0.90 | 0.27  | 0.42   | 0.60   | 0.88   |
| 0.50 | 79.20     | 137.08    | 217.20    | 364.72     |      |       |        |        |        |

Table S114: Critical values for detector  $\hat{H}_{sn}^m$  and FM-OLS and D-OLS estimation in a model with intercept. The number of integrated regressors is 1 and the highest power of  $x_{kt}$  is 1.

| m    | 90 %      | 95 %       | 97,5 %     | 99 %       | m    | 90 %   | 95 %   | 97,5 % | 99 %    |
|------|-----------|------------|------------|------------|------|--------|--------|--------|---------|
| 0.10 | 703667.63 | 1407265.67 | 2476287.29 | 4600119.87 | 0.51 | 230.15 | 395.80 | 625.60 | 1081.43 |
| 0.11 | 462775.18 | 918023.31  | 1628840.61 | 3042853.74 | 0.52 | 203.19 | 350.55 | 553.60 | 945.31  |
| 0.12 | 314672.79 | 629741.85  | 1120595.75 | 2128186.17 | 0.53 | 178.65 | 308.39 | 487.87 | 814.35  |
| 0.13 | 221661.01 | 441143.55  | 781079.87  | 1470082.60 | 0.54 | 158.02 | 271.58 | 429.73 | 708.26  |
| 0.14 | 158486.14 | 315635.54  | 563832.52  | 1066107.98 | 0.55 | 140.67 | 241.06 | 377.61 | 624.51  |
| 0.15 | 116488.48 | 232009.63  | 408546.28  | 766500.48  | 0.56 | 124.79 | 211.64 | 332.71 | 549.80  |
| 0.16 | 88144.66  | 171691.20  | 298514.43  | 564657.24  | 0.57 | 110.55 | 186.75 | 291.66 | 486.09  |
| 0.17 | 66707.07  | 129868.83  | 229042.89  | 428282.81  | 0.58 | 98.56  | 164.89 | 257.06 | 428.54  |
| 0.18 | 51673.92  | 101992.24  | 179663.37  | 326624.64  | 0.59 | 88.12  | 146.43 | 225.82 | 378.18  |
| 0.19 | 40225.57  | 79698.84   | 137251.27  | 250527.16  | 0.60 | 78.18  | 129.78 | 200.11 | 332.70  |
| 0.20 | 31775.78  | 61896.62   | 107164.83  | 201680.67  | 0.61 | 69.38  | 114.93 | 176.17 | 291.53  |
| 0.21 | 25342.66  | 49085.20   | 85289.77   | 158027.12  | 0.62 | 61.48  | 100.76 | 156.58 | 254.56  |
| 0.22 | 20255.89  | 39587.18   | 67757.55   | 124248.87  | 0.63 | 54.77  | 89.41  | 138.55 | 221.94  |
| 0.23 | 16295.99  | 31487.06   | 54893.41   | 100329.14  | 0.64 | 48.72  | 79.83  | 122.09 | 194.84  |
| 0.24 | 13257.53  | 25504.50   | 44282.06   | 81533.08   | 0.65 | 43.39  | 70.73  | 107.00 | 173.16  |
| 0.25 | 10829.30  | 20717.78   | 36233.42   | 66550.03   | 0.66 | 38.93  | 62.49  | 93.67  | 151.62  |
| 0.26 | 8937.23   | 17075.98   | 29717.05   | 53307.54   | 0.67 | 34.62  | 55.19  | 82.79  | 132.45  |
| 0.27 | 7353.89   | 14220.02   | 24591.64   | 44882.11   | 0.68 | 30.82  | 48.54  | 72.46  | 116.35  |
| 0.28 | 6185.20   | 11820.49   | 20164.35   | 36929.29   | 0.69 | 27.15  | 42.95  | 63.93  | 100.16  |
| 0.29 | 5177.33   | 9829.36    | 17022.90   | 30754.25   | 0.70 | 24.00  | 37.97  | 55.94  | 85.83   |
| 0.30 | 4370.00   | 8297.81    | 14288.94   | 25996.82   | 0.71 | 21.19  | 33.37  | 48.94  | 74.63   |
| 0.31 | 3691.26   | 6993.68    | 11912.56   | 21753.41   | 0.72 | 18.79  | 29.34  | 42.79  | 65.35   |
| 0.32 | 3142.18   | 5914.83    | 9947.30    | 18188.01   | 0.73 | 16.62  | 25.85  | 37.41  | 56.40   |
| 0.33 | 2692.85   | 5013.30    | 8424.30    | 15449.54   | 0.74 | 14.67  | 22.71  | 32.61  | 49.04   |
| 0.34 | 2303.80   | 4277.34    | 7181.63    | 13144.97   | 0.75 | 12.97  | 19.95  | 28.46  | 42.89   |
| 0.35 | 1985.60   | 3675.07    | 6155.74    | 11290.17   | 0.76 | 11.45  | 17.57  | 24.75  | 36.91   |
| 0.36 | 1705.02   | 3140.57    | 5287.73    | 9444.02    | 0.77 | 10.02  | 15.28  | 21.59  | 32.13   |
| 0.37 | 1471.30   | 2704.29    | 4531.91    | 8104.42    | 0.78 | 8.79   | 13.29  | 18.81  | 27.76   |
| 0.38 | 1276.69   | 2324.75    | 3895.82    | 6902.58    | 0.79 | 7.70   | 11.57  | 16.32  | 23.81   |
| 0.39 | 1108.25   | 1995.16    | 3335.20    | 5966.27    | 0.80 | 6.72   | 10.05  | 14.12  | 20.44   |
| 0.40 | 962.72    | 1726.11    | 2874.14    | 5066.31    | 0.81 | 5.87   | 8.69   | 12.17  | 17.61   |
| 0.41 | 831.46    | 1492.10    | 2468.01    | 4416.82    | 0.82 | 5.09   | 7.52   | 10.39  | 14.93   |
| 0.42 | 722.13    | 1293.92    | 2147.83    | 3745.33    | 0.83 | 4.42   | 6.44   | 8.86   | 12.66   |
| 0.43 | 629.58    | 1123.19    | 1855.10    | 3276.78    | 0.84 | 3.81   | 5.54   | 7.59   | 10.67   |
| 0.44 | 552.91    | 982.92     | 1608.50    | 2851.45    | 0.85 | 3.26   | 4.72   | 6.46   | 8.94    |
| 0.45 | 488.04    | 859.46     | 1406.98    | 2437.94    | 0.86 | 2.78   | 4.01   | 5.44   | 7.49    |
| 0.46 | 429.64    | 752.19     | 1215.09    | 2091.23    | 0.87 | 2.36   | 3.39   | 4.57   | 6.28    |
| 0.47 | 378.72    | 652.58     | 1054.01    | 1815.31    | 0.88 | 1.99   | 2.85   | 3.79   | 5.23    |
| 0.48 | 334.65    | 577.54     | 928.33     | 1579.95    | 0.89 | 1.67   | 2.37   | 3.13   | 4.32    |
| 0.49 | 295.44    | 506.60     | 811.82     | 1383.66    | 0.90 | 1.39   | 1.96   | 2.58   | 3.50    |
| 0.50 | 261.15    | 447.75     | 709.73     | 1230.00    |      |        |        |        |         |

Table S115: Critical values for detector  $\hat{H}_{sn}^m$  and IM-OLS estimation in a model with intercept. The number of integrated regressors is 1 and the highest power of  $x_{kt}$  is 1.

| m    | 90 %       | 95 %        | 97,5 %      | 99 %        | m    | 90 %   | 95 %   | 97,5 % | 99 %    |
|------|------------|-------------|-------------|-------------|------|--------|--------|--------|---------|
| 0.10 | 7545226.95 | 12686333.71 | 19865203.74 | 33570592.48 | 0.51 | 399.64 | 642.80 | 972.68 | 1552.50 |
| 0.11 | 4501687.46 | 7542510.22  | 11878480.07 | 20252324.45 | 0.52 | 345.37 | 553.31 | 828.88 | 1290.41 |
| 0.12 | 2783479.82 | 4739233.62  | 7312302.89  | 12311382.90 | 0.53 | 293.12 | 474.14 | 709.54 | 1113.10 |
| 0.13 | 1809736.69 | 3050534.64  | 4810204.78  | 8100904.45  | 0.54 | 254.75 | 410.26 | 607.85 | 966.48  |
| 0.14 | 1209975.74 | 2024924.25  | 3200753.22  | 5344313.29  | 0.55 | 219.63 | 354.69 | 527.09 | 826.66  |
| 0.15 | 828510.96  | 1399566.92  | 2184970.90  | 3616613.58  | 0.56 | 191.39 | 308.02 | 457.87 | 706.33  |
| 0.16 | 578397.46  | 977295.71   | 1526081.23  | 2530831.69  | 0.57 | 163.30 | 264.73 | 395.46 | 610.07  |
| 0.17 | 411377.89  | 696498.15   | 1089319.38  | 1801925.91  | 0.58 | 142.05 | 229.86 | 339.71 | 524.98  |
| 0.18 | 295897.59  | 503606.22   | 785336.54   | 1335715.18  | 0.59 | 122.97 | 197.94 | 293.12 | 455.77  |
| 0.19 | 219545.04  | 367605.12   | 576818.67   | 968124.31   | 0.60 | 105.91 | 169.18 | 250.10 | 392.40  |
| 0.20 | 163981.05  | 277042.99   | 431789.33   | 728719.75   | 0.61 | 91.29  | 145.82 | 213.69 | 338.83  |
| 0.21 | 123572.98  | 208702.12   | 322352.62   | 539531.67   | 0.62 | 78.73  | 124.93 | 184.17 | 284.78  |
| 0.22 | 94381.32   | 160373.84   | 249910.86   | 415478.72   | 0.63 | 67.20  | 107.69 | 157.21 | 244.49  |
| 0.23 | 73871.88   | 124143.88   | 193349.80   | 321786.58   | 0.64 | 58.00  | 92.43  | 135.16 | 209.15  |
| 0.24 | 56938.99   | 96429.32    | 152425.63   | 246481.42   | 0.65 | 50.39  | 79.32  | 116.34 | 179.80  |
| 0.25 | 44999.92   | 75813.08    | 117304.15   | 197581.08   | 0.66 | 43.33  | 68.07  | 99.57  | 151.57  |
| 0.26 | 35792.94   | 59914.97    | 93145.21    | 153543.22   | 0.67 | 37.23  | 59.19  | 85.43  | 130.87  |
| 0.27 | 28496.15   | 47301.74    | 73940.77    | 123774.87   | 0.68 | 32.25  | 50.84  | 74.27  | 111.56  |
| 0.28 | 22949.52   | 37993.15    | 59631.67    | 98240.67    | 0.69 | 27.90  | 43.74  | 63.40  | 95.14   |
| 0.29 | 18456.45   | 30805.34    | 47516.96    | 77372.80    | 0.70 | 23.86  | 37.07  | 53.19  | 80.80   |
| 0.30 | 14941.21   | 24830.72    | 37779.77    | 63042.48    | 0.71 | 20.41  | 31.91  | 45.93  | 68.08   |
| 0.31 | 12178.87   | 20275.38    | 31548.50    | 51895.75    | 0.72 | 17.53  | 27.27  | 39.50  | 59.13   |
| 0.32 | 9926.81    | 16577.81    | 25662.40    | 42562.20    | 0.73 | 15.01  | 23.30  | 33.80  | 50.93   |
| 0.33 | 8192.46    | 13615.47    | 20958.09    | 34434.71    | 0.74 | 12.80  | 19.79  | 28.55  | 43.01   |
| 0.34 | 6795.85    | 11218.54    | 17387.51    | 28594.08    | 0.75 | 10.87  | 16.96  | 24.17  | 35.69   |
| 0.35 | 5625.88    | 9373.03     | 14535.40    | 23557.29    | 0.76 | 9.29   | 14.42  | 20.66  | 30.30   |
| 0.36 | 4669.41    | 7787.24     | 11991.02    | 19945.61    | 0.77 | 7.93   | 12.18  | 17.36  | 25.69   |
| 0.37 | 3900.67    | 6419.86     | 9884.66     | 16398.93    | 0.78 | 6.68   | 10.30  | 14.48  | 21.43   |
| 0.38 | 3271.73    | 5442.33     | 8381.53     | 13712.01    | 0.79 | 5.61   | 8.65   | 12.23  | 17.96   |
| 0.39 | 2772.16    | 4510.37     | 6958.20     | 11393.13    | 0.80 | 4.70   | 7.17   | 10.25  | 15.11   |
| 0.40 | 2313.96    | 3812.71     | 5782.41     | 9418.92     | 0.81 | 3.95   | 6.03   | 8.55   | 12.39   |
| 0.41 | 1944.86    | 3214.16     | 4854.88     | 7895.01     | 0.82 | 3.27   | 5.04   | 7.05   | 10.30   |
| 0.42 | 1652.50    | 2715.19     | 4135.15     | 6640.82     | 0.83 | 2.72   | 4.14   | 5.81   | 8.50    |
| 0.43 | 1403.68    | 2300.55     | 3512.25     | 5651.90     | 0.84 | 2.23   | 3.39   | 4.82   | 6.91    |
| 0.44 | 1202.54    | 1978.91     | 3013.91     | 4723.85     | 0.85 | 1.80   | 2.72   | 3.86   | 5.61    |
| 0.45 | 1018.13    | 1676.75     | 2517.86     | 4035.73     | 0.86 | 1.46   | 2.19   | 3.10   | 4.48    |
| 0.46 | 873.28     | 1425.63     | 2145.24     | 3412.80     | 0.87 | 1.17   | 1.78   | 2.45   | 3.54    |
| 0.47 | 742.16     | 1218.56     | 1833.13     | 2877.44     | 0.88 | 0.93   | 1.40   | 1.95   | 2.77    |
| 0.48 | 633.31     | 1036.57     | 1555.29     | 2459.27     | 0.89 | 0.72   | 1.10   | 1.51   | 2.17    |
| 0.49 | 547.17     | 880.09      | 1318.51     | 2094.12     | 0.90 | 0.56   | 0.84   | 1.17   | 1.66    |
| 0.50 | 464.79     | 753.55      | 1138.13     | 1804.41     |      |        |        |        |         |

Table S116: Critical values for detector  $\hat{H}_{sn}^m$  and FM-OLS and D-OLS estimation in a model with intercept and linear trend. The number of integrated regressors is 1 and the highest power of  $x_{kt}$  is 1.

| m    | 90 %        | 95 %        | 97,5 %      | 99 %        | m    | 90 %    | 95 %    | 97,5 %  | 99 %    |
|------|-------------|-------------|-------------|-------------|------|---------|---------|---------|---------|
| 0.10 | 18960942.83 | 33304508.39 | 53351045.36 | 91771489.88 | 0.51 | 1005.53 | 1640.17 | 2519.88 | 4113.07 |
| 0.11 | 11322472.82 | 20047814.89 | 31824619.45 | 56458598.07 | 0.52 | 864.03  | 1410.13 | 2147.65 | 3531.37 |
| 0.12 | 7010266.19  | 12309395.76 | 20148577.46 | 33787997.81 | 0.53 | 740.82  | 1210.38 | 1835.45 | 3030.34 |
| 0.13 | 4514501.06  | 7932251.79  | 12773716.08 | 22061454.39 | 0.54 | 640.99  | 1046.18 | 1566.00 | 2596.30 |
| 0.14 | 3045619.11  | 5265675.39  | 8425639.58  | 14317807.12 | 0.55 | 552.74  | 900.96  | 1351.76 | 2223.77 |
| 0.15 | 2094006.10  | 3572074.19  | 5679012.51  | 9824315.48  | 0.56 | 478.37  | 779.00  | 1170.92 | 1890.68 |
| 0.16 | 1446627.51  | 2522244.12  | 3996171.86  | 6842192.43  | 0.57 | 414.74  | 671.30  | 1014.61 | 1610.56 |
| 0.17 | 1028880.79  | 1786329.27  | 2855473.17  | 4921962.67  | 0.58 | 359.89  | 578.49  | 868.19  | 1390.10 |
| 0.18 | 744977.50   | 1298688.47  | 2083900.51  | 3570717.01  | 0.59 | 311.91  | 497.72  | 749.75  | 1208.12 |
| 0.19 | 546651.37   | 949534.93   | 1535811.99  | 2616283.96  | 0.60 | 270.01  | 430.02  | 644.78  | 1038.54 |
| 0.20 | 406203.23   | 709285.82   | 1150038.01  | 1951249.64  | 0.61 | 233.83  | 371.27  | 553.46  | 896.93  |
| 0.21 | 309444.34   | 533063.70   | 862832.84   | 1489804.67  | 0.62 | 202.03  | 321.61  | 475.45  | 759.04  |
| 0.22 | 236265.36   | 408515.07   | 654201.57   | 1121473.61  | 0.63 | 174.90  | 276.07  | 408.43  | 651.93  |
| 0.23 | 183069.32   | 312275.34   | 499890.96   | 845520.93   | 0.64 | 150.85  | 237.38  | 350.40  | 558.09  |
| 0.24 | 142274.05   | 243083.83   | 386105.14   | 657310.18   | 0.65 | 130.26  | 204.33  | 301.34  | 474.38  |
| 0.25 | 111751.59   | 191770.06   | 301328.74   | 519714.31   | 0.66 | 112.76  | 175.88  | 256.65  | 406.19  |
| 0.26 | 88351.31    | 151335.26   | 237572.85   | 403699.86   | 0.67 | 97.30   | 151.18  | 220.01  | 347.56  |
| 0.27 | 70019.92    | 120607.32   | 190052.75   | 317467.06   | 0.68 | 84.14   | 129.84  | 188.87  | 295.34  |
| 0.28 | 56347.67    | 96233.35    | 152872.17   | 254268.16   | 0.69 | 72.81   | 112.31  | 162.54  | 247.89  |
| 0.29 | 45225.39    | 77679.31    | 124278.88   | 205532.94   | 0.70 | 62.77   | 96.16   | 139.20  | 210.49  |
| 0.30 | 36653.30    | 63054.92    | 99845.79    | 170590.08   | 0.71 | 54.36   | 82.82   | 118.55  | 178.83  |
| 0.31 | 30115.98    | 51067.13    | 81121.36    | 138332.89   | 0.72 | 46.59   | 70.97   | 101.13  | 153.34  |
| 0.32 | 24747.23    | 42007.50    | 65428.83    | 114142.61   | 0.73 | 40.02   | 61.16   | 86.75   | 129.57  |
| 0.33 | 20327.96    | 34336.82    | 54068.88    | 91535.60    | 0.74 | 34.53   | 52.30   | 74.07   | 110.79  |
| 0.34 | 16799.04    | 28004.30    | 44384.89    | 74528.20    | 0.75 | 29.68   | 44.97   | 63.54   | 93.27   |
| 0.35 | 13848.33    | 23413.53    | 36410.70    | 61532.76    | 0.76 | 25.36   | 38.41   | 54.09   | 78.74   |
| 0.36 | 11520.56    | 19403.79    | 30316.70    | 51533.86    | 0.77 | 21.74   | 32.84   | 45.96   | 66.67   |
| 0.37 | 9674.24     | 16225.45    | 25556.37    | 42319.65    | 0.78 | 18.56   | 27.77   | 38.84   | 56.49   |
| 0.38 | 8142.13     | 13563.45    | 21246.57    | 35709.40    | 0.79 | 15.78   | 23.66   | 32.82   | 47.35   |
| 0.39 | 6865.92     | 11392.30    | 17880.14    | 29957.52    | 0.80 | 13.39   | 19.93   | 27.69   | 39.75   |
| 0.40 | 5788.88     | 9697.42     | 14861.83    | 24959.04    | 0.81 | 11.36   | 16.86   | 23.30   | 33.32   |
| 0.41 | 4871.96     | 8171.62     | 12416.92    | 20716.65    | 0.82 | 9.61    | 14.12   | 19.48   | 27.78   |
| 0.42 | 4113.82     | 6907.64     | 10518.39    | 17422.17    | 0.83 | 8.06    | 11.85   | 16.24   | 23.29   |
| 0.43 | 3509.65     | 5819.30     | 8921.85     | 14802.43    | 0.84 | 6.78    | 9.92    | 13.49   | 19.08   |
| 0.44 | 2994.96     | 4999.11     | 7656.57     | 12486.64    | 0.85 | 5.65    | 8.25    | 11.09   | 15.65   |
| 0.45 | 2555.54     | 4231.29     | 6532.88     | 10589.64    | 0.86 | 4.68    | 6.83    | 9.20    | 12.86   |
| 0.46 | 2182.09     | 3584.11     | 5557.91     | 9120.47     | 0.87 | 3.86    | 5.59    | 7.54    | 10.37   |
| 0.47 | 1857.52     | 3066.53     | 4714.16     | 7710.61     | 0.88 | 3.15    | 4.54    | 6.14    | 8.35    |
| 0.48 | 1580.07     | 2634.24     | 4036.44     | 6654.32     | 0.89 | 2.54    | 3.67    | 4.92    | 6.64    |
| 0.49 | 1358.24     | 2248.28     | 3454.27     | 5593.61     | 0.90 | 2.04    | 2.93    | 3.91    | 5.26    |
| 0.50 | 1165.24     | 1927.29     | 2951.78     | 4800.38     |      |         |         |         |         |

Table S117: Critical values for detector  $\hat{H}_{sn}^m$  and IM-OLS estimation in a model with intercept and linear trend. The number of integrated regressors is 1 and the highest power of  $x_{kt}$  is 1.

| m    | 90 %        | 95 %        | 97,5 %      | 99 %         | m    | 90 %   | 95 %    | 97,5 %  | 99 %    |
|------|-------------|-------------|-------------|--------------|------|--------|---------|---------|---------|
| 0.10 | 15783624.77 | 41734571.73 | 94981226.36 | 230134472.49 | 0.51 | 428.23 | 1063.89 | 2283.70 | 5247.74 |
| 0.11 | 9188965.87  | 24436193.65 | 56017044.23 | 136234886.11 | 0.52 | 357.76 | 895.66  | 1877.43 | 4338.29 |
| 0.12 | 5715213.51  | 15188635.15 | 35333202.54 | 84756888.42  | 0.53 | 304.05 | 744.52  | 1542.20 | 3648.14 |
| 0.13 | 3665796.23  | 9593353.99  | 21576353.28 | 52279134.02  | 0.54 | 257.89 | 632.22  | 1301.20 | 3112.88 |
| 0.14 | 2388780.13  | 6267654.08  | 14393537.93 | 35141011.30  | 0.55 | 217.70 | 533.62  | 1105.26 | 2570.16 |
| 0.15 | 1604578.41  | 4308473.67  | 9490182.39  | 24219348.52  | 0.56 | 186.13 | 453.98  | 942.26  | 2191.51 |
| 0.16 | 1111015.50  | 3012291.81  | 6605974.46  | 15845653.89  | 0.57 | 159.37 | 384.69  | 803.49  | 1854.62 |
| 0.17 | 776122.16   | 2055682.25  | 4652420.07  | 11307146.61  | 0.58 | 134.61 | 322.47  | 669.37  | 1535.02 |
| 0.18 | 564134.29   | 1492132.35  | 3367976.07  | 8052706.03   | 0.59 | 114.62 | 272.74  | 565.06  | 1304.77 |
| 0.19 | 408636.35   | 1066104.36  | 2451672.78  | 5780379.97   | 0.60 | 98.19  | 228.88  | 478.82  | 1080.77 |
| 0.20 | 301634.87   | 793854.48   | 1811237.77  | 4323902.22   | 0.61 | 82.67  | 194.61  | 402.43  | 905.47  |
| 0.21 | 221222.27   | 580243.35   | 1307958.84  | 3219089.83   | 0.62 | 69.85  | 160.61  | 331.98  | 744.89  |
| 0.22 | 167843.09   | 440675.58   | 991744.77   | 2471257.57   | 0.63 | 59.83  | 135.06  | 282.86  | 616.42  |
| 0.23 | 129151.55   | 340180.23   | 761083.23   | 1833348.20   | 0.64 | 50.22  | 112.85  | 227.82  | 500.18  |
| 0.24 | 96994.52    | 262829.04   | 584387.39   | 1378212.02   | 0.65 | 42.37  | 96.05   | 191.73  | 427.24  |
| 0.25 | 74746.20    | 199334.58   | 452217.75   | 1078832.43   | 0.66 | 36.01  | 79.51   | 162.72  | 361.63  |
| 0.26 | 58263.37    | 151692.12   | 349125.21   | 847585.26    | 0.67 | 30.32  | 66.21   | 129.95  | 289.40  |
| 0.27 | 46025.21    | 120397.80   | 272451.73   | 650451.59    | 0.68 | 25.95  | 55.83   | 106.40  | 229.75  |
| 0.28 | 36620.17    | 95733.11    | 211172.78   | 507530.66    | 0.69 | 21.71  | 46.38   | 88.64   | 188.57  |
| 0.29 | 29231.40    | 75637.66    | 170624.27   | 386769.67    | 0.70 | 18.56  | 38.88   | 74.19   | 154.09  |
| 0.30 | 23392.88    | 60274.73    | 133713.94   | 315147.90    | 0.71 | 15.73  | 32.43   | 61.63   | 128.18  |
| 0.31 | 18384.27    | 48741.84    | 107730.64   | 253068.85    | 0.72 | 13.39  | 27.70   | 51.19   | 106.88  |
| 0.32 | 14854.13    | 38448.08    | 85378.62    | 207002.83    | 0.73 | 11.41  | 22.98   | 42.37   | 87.72   |
| 0.33 | 12022.42    | 31617.13    | 67738.36    | 167883.08    | 0.74 | 9.64   | 19.08   | 35.22   | 72.64   |
| 0.34 | 9667.80     | 25483.19    | 56474.73    | 140764.01    | 0.75 | 8.19   | 15.60   | 28.71   | 59.18   |
| 0.35 | 7764.53     | 20338.79    | 44977.89    | 111063.65    | 0.76 | 6.88   | 13.11   | 23.76   | 49.00   |
| 0.36 | 6415.94     | 16523.94    | 36190.60    | 89573.80     | 0.77 | 5.79   | 10.94   | 19.24   | 40.00   |
| 0.37 | 5264.13     | 13627.75    | 29658.08    | 73174.52     | 0.78 | 4.83   | 9.01    | 15.87   | 31.43   |
| 0.38 | 4412.71     | 11299.38    | 24907.66    | 60925.25     | 0.79 | 4.04   | 7.48    | 12.92   | 24.98   |
| 0.39 | 3618.18     | 9402.02     | 20276.32    | 48789.50     | 0.80 | 3.38   | 6.16    | 10.56   | 20.19   |
| 0.40 | 2985.39     | 7716.48     | 17073.00    | 40223.32     | 0.81 | 2.83   | 5.10    | 8.51    | 15.46   |
| 0.41 | 2499.48     | 6400.28     | 13875.41    | 33119.46     | 0.82 | 2.35   | 4.17    | 6.90    | 12.51   |
| 0.42 | 2061.00     | 5332.34     | 11620.97    | 27951.88     | 0.83 | 1.93   | 3.35    | 5.46    | 9.86    |
| 0.43 | 1728.08     | 4389.92     | 9758.99     | 22993.59     | 0.84 | 1.57   | 2.72    | 4.38    | 7.83    |
| 0.44 | 1438.49     | 3641.38     | 8164.52     | 19128.29     | 0.85 | 1.27   | 2.15    | 3.45    | 6.09    |
| 0.45 | 1207.88     | 3046.64     | 6657.43     | 15640.03     | 0.86 | 1.02   | 1.74    | 2.70    | 4.54    |
| 0.46 | 1010.10     | 2539.90     | 5608.08     | 12826.92     | 0.87 | 0.82   | 1.36    | 2.14    | 3.59    |
| 0.47 | 857.00      | 2140.78     | 4684.32     | 11093.70     | 0.88 | 0.65   | 1.08    | 1.65    | 2.69    |
| 0.48 | 716.49      | 1812.30     | 3925.78     | 9129.47      | 0.89 | 0.51   | 0.83    | 1.26    | 2.05    |
| 0.49 | 608.53      | 1530.80     | 3301.74     | 7710.14      | 0.90 | 0.39   | 0.63    | 0.95    | 1.56    |
| 0.50 | 507.26      | 1262.99     | 2729.78     | 6355.58      |      |        |         |         |         |

Table S118: Critical values for detector  $\hat{H}_{sn}^m$  and FM-OLS and D-OLS estimation in a model with intercept. The number of integrated regressors is 1 and the highest power of  $x_{kt}$  is 2.

| m    | 90 %         | 95 %         | 97,5 %       | 99 %          | m    | 90 %    | 95 %    | 97,5 %   | 99 %     |
|------|--------------|--------------|--------------|---------------|------|---------|---------|----------|----------|
| 0.10 | 109499067.59 | 314437439.82 | 762302402.28 | 1955336361.02 | 0.51 | 2722.31 | 7213.34 | 16354.75 | 40409.53 |
| 0.11 | 63745196.69  | 181658929.83 | 450191269.28 | 1205923146.29 | 0.52 | 2269.71 | 6059.96 | 13791.23 | 33625.81 |
| 0.12 | 39452130.15  | 112710829.59 | 276855553.35 | 713232532.56  | 0.53 | 1914.58 | 5060.36 | 11491.51 | 28828.39 |
| 0.13 | 24968386.74  | 70904374.73  | 175582654.08 | 469174167.10  | 0.54 | 1607.04 | 4286.11 | 9513.96  | 24111.60 |
| 0.14 | 16666313.07  | 47371208.59  | 110680045.53 | 292203413.89  | 0.55 | 1347.67 | 3572.04 | 7925.90  | 20143.45 |
| 0.15 | 11298101.54  | 31630457.04  | 74916290.49  | 193288276.91  | 0.56 | 1136.09 | 2986.97 | 6634.47  | 16818.00 |
| 0.16 | 7811505.91   | 22125178.52  | 51206929.61  | 134456911.11  | 0.57 | 958.32  | 2529.34 | 5629.27  | 14142.81 |
| 0.17 | 5493869.49   | 15357450.99  | 36173792.81  | 91610735.53   | 0.58 | 804.15  | 2086.88 | 4734.79  | 12028.84 |
| 0.18 | 3945867.39   | 11135525.71  | 25727032.38  | 67195013.40   | 0.59 | 684.84  | 1763.84 | 4023.46  | 10039.19 |
| 0.19 | 2855659.01   | 7924601.49   | 18721369.84  | 48529386.26   | 0.60 | 582.38  | 1480.37 | 3372.16  | 8217.22  |
| 0.20 | 2076666.13   | 5809994.39   | 14016938.24  | 37127196.51   | 0.61 | 494.55  | 1249.92 | 2779.64  | 6875.05  |
| 0.21 | 1557444.91   | 4376033.09   | 10415959.35  | 28188746.25   | 0.62 | 418.94  | 1047.91 | 2350.77  | 5748.08  |
| 0.22 | 1169869.54   | 3262135.49   | 7810893.45   | 20892371.94   | 0.63 | 355.03  | 874.77  | 1959.65  | 4858.19  |
| 0.23 | 900333.39    | 2497283.11   | 5970806.60   | 15798456.88   | 0.64 | 297.79  | 738.58  | 1612.57  | 3908.04  |
| 0.24 | 690920.82    | 1910630.10   | 4571293.53   | 11965965.14   | 0.65 | 250.15  | 618.02  | 1323.66  | 3240.63  |
| 0.25 | 531053.02    | 1470460.47   | 3512175.75   | 9032720.89    | 0.66 | 210.44  | 518.81  | 1112.92  | 2677.85  |
| 0.26 | 411535.46    | 1165820.24   | 2715506.13   | 7011812.99    | 0.67 | 175.34  | 434.92  | 905.37   | 2189.41  |
| 0.27 | 319951.86    | 896906.11    | 2113436.75   | 5393609.38    | 0.68 | 147.11  | 363.75  | 752.09   | 1795.12  |
| 0.28 | 249082.62    | 694657.75    | 1638722.03   | 4227423.40    | 0.69 | 124.36  | 297.62  | 623.21   | 1454.46  |
| 0.29 | 197617.72    | 548680.68    | 1291123.81   | 3250404.76    | 0.70 | 103.72  | 244.43  | 510.46   | 1183.68  |
| 0.30 | 156621.45    | 440725.05    | 1034617.50   | 2597994.21    | 0.71 | 85.79   | 202.36  | 428.55   | 947.51   |
| 0.31 | 126655.96    | 352347.92    | 818027.61    | 2120106.45    | 0.72 | 72.20   | 167.69  | 347.68   | 775.34   |
| 0.32 | 102505.10    | 280897.61    | 666501.83    | 1688737.09    | 0.73 | 60.28   | 138.58  | 284.84   | 634.66   |
| 0.33 | 82711.90     | 227094.39    | 534363.89    | 1384607.22    | 0.74 | 50.47   | 114.31  | 231.55   | 523.05   |
| 0.34 | 66828.78     | 185846.46    | 434019.15    | 1097219.57    | 0.75 | 42.61   | 93.38   | 188.29   | 418.86   |
| 0.35 | 54138.83     | 150188.28    | 348764.31    | 899513.85     | 0.76 | 35.46   | 76.57   | 154.44   | 333.77   |
| 0.36 | 43978.96     | 122477.91    | 284630.33    | 721547.60     | 0.77 | 29.48   | 63.93   | 126.03   | 276.12   |
| 0.37 | 35712.98     | 99499.32     | 233653.30    | 590821.52     | 0.78 | 24.71   | 52.46   | 101.91   | 222.70   |
| 0.38 | 29034.08     | 81363.01     | 193979.16    | 494013.80     | 0.79 | 20.54   | 42.70   | 82.66    | 181.93   |
| 0.39 | 23757.40     | 65901.07     | 154674.38    | 406846.62     | 0.80 | 17.07   | 34.89   | 67.38    | 140.85   |
| 0.40 | 19628.08     | 53665.84     | 125728.69    | 334024.79     | 0.81 | 14.08   | 28.42   | 53.39    | 108.70   |
| 0.41 | 16403.82     | 44504.45     | 103724.20    | 273093.94     | 0.82 | 11.68   | 23.01   | 42.70    | 86.12    |
| 0.42 | 13687.90     | 36914.91     | 86582.33     | 218252.59     | 0.83 | 9.60    | 18.45   | 33.55    | 68.67    |
| 0.43 | 11371.63     | 30588.93     | 71692.31     | 184264.52     | 0.84 | 7.98    | 14.77   | 26.69    | 52.73    |
| 0.44 | 9546.21      | 25453.37     | 58810.17     | 155169.56     | 0.85 | 6.55    | 11.72   | 20.74    | 41.63    |
| 0.45 | 7886.53      | 21454.12     | 48252.59     | 126697.34     | 0.86 | 5.29    | 9.37    | 16.17    | 31.73    |
| 0.46 | 6641.96      | 17834.39     | 40473.21     | 104678.70     | 0.87 | 4.28    | 7.38    | 12.58    | 24.53    |
| 0.47 | 5577.35      | 14925.17     | 33673.62     | 86230.41      | 0.88 | 3.46    | 5.81    | 9.77     | 18.23    |
| 0.48 | 4627.84      | 12402.58     | 27907.10     | 69496.91      | 0.89 | 2.75    | 4.59    | 7.42     | 13.42    |
| 0.49 | 3880.49      | 10392.93     | 23228.63     | 57254.49      | 0.90 | 2.19    | 3.56    | 5.63     | 10.13    |
| 0.50 | 3261.61      | 8604.67      | 19623.96     | 47360.53      |      |         |         |          |          |

Table S119: Critical values for detector  $\hat{H}_{sn}^m$  and IM-OLS estimation in a model with intercept. The number of integrated regressors is 1 and the highest power of  $x_{kt}$  is 2.



| m    | 90 %        | 95 %         | 97,5 %       | 99 %         | m    | 90 %    | 95 %    | 97,5 %  | 99 %     |
|------|-------------|--------------|--------------|--------------|------|---------|---------|---------|----------|
| 0.10 | 53019200.86 | 118477680.19 | 247103625.53 | 576425535.78 | 0.51 | 1218.00 | 2483.66 | 4809.98 | 10156.20 |
| 0.11 | 30949670.15 | 69700658.79  | 144294352.04 | 332780429.67 | 0.52 | 1034.99 | 2074.65 | 3949.29 | 8614.29  |
| 0.12 | 18791766.11 | 42752859.34  | 86074866.75  | 203786345.43 | 0.53 | 868.73  | 1734.01 | 3305.79 | 7137.87  |
| 0.13 | 11695966.56 | 26060830.33  | 53570978.51  | 127135301.50 | 0.54 | 737.89  | 1484.57 | 2791.86 | 6045.94  |
| 0.14 | 7643262.96  | 17037891.21  | 34587940.48  | 81381280.52  | 0.55 | 622.88  | 1250.77 | 2343.37 | 5091.75  |
| 0.15 | 5092820.25  | 11390870.08  | 23220882.91  | 55473106.76  | 0.56 | 530.50  | 1053.09 | 1998.27 | 4309.83  |
| 0.16 | 3494349.79  | 7651730.74   | 15891169.61  | 36319684.14  | 0.57 | 451.77  | 885.79  | 1659.51 | 3551.17  |
| 0.17 | 2424135.37  | 5285690.09   | 11162783.47  | 25492871.04  | 0.58 | 383.69  | 742.16  | 1374.47 | 3015.88  |
| 0.18 | 1711312.65  | 3780842.68   | 7654391.36   | 17585236.03  | 0.59 | 323.75  | 628.68  | 1169.21 | 2483.54  |
| 0.19 | 1219095.80  | 2703659.33   | 5477749.14   | 12638276.66  | 0.60 | 272.27  | 533.72  | 979.14  | 2139.58  |
| 0.20 | 898524.37   | 1964569.80   | 4053931.36   | 9194636.49   | 0.61 | 230.29  | 447.04  | 827.93  | 1753.60  |
| 0.21 | 659000.31   | 1441472.83   | 2955785.69   | 6741976.42   | 0.62 | 196.36  | 372.27  | 670.05  | 1456.92  |
| 0.22 | 493730.46   | 1086578.30   | 2217783.76   | 5042640.25   | 0.63 | 163.68  | 311.74  | 566.33  | 1208.96  |
| 0.23 | 374155.45   | 812671.55    | 1650264.86   | 3863205.53   | 0.64 | 136.95  | 259.05  | 470.40  | 987.72   |
| 0.24 | 287114.95   | 634619.72    | 1264419.73   | 2942299.60   | 0.65 | 116.00  | 219.40  | 400.25  | 820.89   |
| 0.25 | 220107.34   | 487332.44    | 989310.18    | 2269544.26   | 0.66 | 98.15   | 184.05  | 335.03  | 671.28   |
| 0.26 | 172331.30   | 371960.09    | 760880.86    | 1746144.98   | 0.67 | 82.76   | 153.86  | 269.22  | 551.39   |
| 0.27 | 135848.54   | 291550.39    | 587752.02    | 1357705.62   | 0.68 | 70.33   | 127.72  | 221.32  | 452.51   |
| 0.28 | 106519.27   | 232005.39    | 464141.54    | 1036776.95   | 0.69 | 59.30   | 106.49  | 184.05  | 364.96   |
| 0.29 | 84362.14    | 182719.50    | 365219.95    | 821985.20    | 0.70 | 49.79   | 89.94   | 152.94  | 300.14   |
| 0.30 | 67133.57    | 144337.66    | 287809.19    | 666068.29    | 0.71 | 41.41   | 75.10   | 128.19  | 249.28   |
| 0.31 | 53780.72    | 114798.24    | 234548.23    | 529334.66    | 0.72 | 35.46   | 63.00   | 105.28  | 208.05   |
| 0.32 | 43126.77    | 91004.52     | 184301.26    | 430744.11    | 0.73 | 29.80   | 52.69   | 88.92   | 167.79   |
| 0.33 | 34942.46    | 74026.30     | 147806.73    | 344156.61    | 0.74 | 24.88   | 44.16   | 73.29   | 136.96   |
| 0.34 | 27959.35    | 59595.30     | 119977.10    | 277601.35    | 0.75 | 20.73   | 36.26   | 59.93   | 111.86   |
| 0.35 | 22771.18    | 48577.79     | 95734.72     | 221883.23    | 0.76 | 17.45   | 30.03   | 50.07   | 92.20    |
| 0.36 | 18778.55    | 39886.57     | 77840.91     | 180018.60    | 0.77 | 14.43   | 24.87   | 40.78   | 75.19    |
| 0.37 | 15385.27    | 32186.47     | 63340.68     | 148380.57    | 0.78 | 11.96   | 20.37   | 33.58   | 60.42    |
| 0.38 | 12598.20    | 26565.59     | 52446.05     | 119620.77    | 0.79 | 9.94    | 16.65   | 26.70   | 47.63    |
| 0.39 | 10441.89    | 21525.77     | 42454.76     | 96930.94     | 0.80 | 8.14    | 13.54   | 21.70   | 38.13    |
| 0.40 | 8512.13     | 17844.39     | 34637.71     | 80023.39     | 0.81 | 6.70    | 11.06   | 17.21   | 29.43    |
| 0.41 | 7154.01     | 14809.35     | 28621.30     | 64136.29     | 0.82 | 5.49    | 8.99    | 13.88   | 23.70    |
| 0.42 | 5955.92     | 12458.78     | 23770.56     | 54440.95     | 0.83 | 4.41    | 7.22    | 11.00   | 18.27    |
| 0.43 | 4925.26     | 10278.20     | 19747.09     | 43941.73     | 0.84 | 3.52    | 5.80    | 8.87    | 14.53    |
| 0.44 | 4161.60     | 8625.92      | 16415.79     | 36259.61     | 0.85 | 2.79    | 4.56    | 6.89    | 11.12    |
| 0.45 | 3442.14     | 7272.17      | 13684.11     | 29658.47     | 0.86 | 2.21    | 3.59    | 5.33    | 8.53     |
| 0.46 | 2886.12     | 5997.82      | 11611.19     | 24935.48     | 0.87 | 1.75    | 2.78    | 4.14    | 6.73     |
| 0.47 | 2441.08     | 5029.47      | 9647.73      | 20884.86     | 0.88 | 1.36    | 2.14    | 3.17    | 5.00     |
| 0.48 | 2052.80     | 4208.73      | 8180.50      | 17446.13     | 0.89 | 1.04    | 1.64    | 2.41    | 3.74     |
| 0.49 | 1722.46     | 3571.02      | 6877.72      | 14785.28     | 0.90 | 0.78    | 1.22    | 1.78    | 2.75     |
| 0.50 | 1438.74     | 2993.66      | 5779.22      | 12434.94     |      |         |         |         |          |

Table S120: Critical values for detector  $\hat{H}_{sn}^m$  and FM-OLS and D-OLS estimation in a model with intercept and linear trend. The number of integrated regressors is 1 and the highest power of  $x_{kt}$  is 2.

| m    | 90 %         | 95 %         | 97,5 %        | 99 %          | m    | 90 %    | 95 %    | 97,5 %   | 99 %     |
|------|--------------|--------------|---------------|---------------|------|---------|---------|----------|----------|
| 0.10 | 211942827.57 | 524665532.40 | 1131501960.02 | 2795884910.77 | 0.51 | 4339.64 | 9554.36 | 20239.13 | 47492.57 |
| 0.11 | 124095530.80 | 304081799.13 | 673581238.89  | 1633611991.59 | 0.52 | 3676.04 | 8092.02 | 16712.12 | 39544.43 |
| 0.12 | 73956134.08  | 185756628.58 | 410032079.99  | 995159159.03  | 0.53 | 3082.82 | 6760.44 | 14075.73 | 33215.36 |
| 0.13 | 46613474.03  | 113364030.51 | 249552409.43  | 620717639.80  | 0.54 | 2590.75 | 5697.78 | 11820.07 | 28197.62 |
| 0.14 | 29930456.29  | 73412801.67  | 163634102.13  | 394838565.27  | 0.55 | 2165.29 | 4824.43 | 9880.18  | 23490.79 |
| 0.15 | 19926257.86  | 48287225.25  | 105844455.06  | 257163479.36  | 0.56 | 1837.09 | 3999.63 | 8238.51  | 19596.43 |
| 0.16 | 13527130.75  | 33517409.28  | 72143216.54   | 175055926.57  | 0.57 | 1558.67 | 3350.86 | 6919.58  | 16500.41 |
| 0.17 | 9301429.68   | 23084432.78  | 50266871.03   | 118948915.73  | 0.58 | 1304.26 | 2842.96 | 5809.22  | 14104.40 |
| 0.18 | 6560592.61   | 16076349.93  | 35324101.01   | 84150956.33   | 0.59 | 1104.92 | 2380.83 | 4933.92  | 11882.74 |
| 0.19 | 4683721.50   | 11295077.48  | 25059308.13   | 59303633.10   | 0.60 | 937.59  | 2011.61 | 4049.32  | 9891.77  |
| 0.20 | 3409662.61   | 8127935.55   | 17918641.77   | 43968447.77   | 0.61 | 788.66  | 1675.81 | 3348.40  | 8143.77  |
| 0.21 | 2510055.90   | 5970530.20   | 13264002.14   | 31847246.10   | 0.62 | 666.40  | 1408.61 | 2833.65  | 6832.79  |
| 0.22 | 1861035.08   | 4452118.79   | 9710883.82    | 24108805.43   | 0.63 | 562.47  | 1190.02 | 2377.37  | 5616.60  |
| 0.23 | 1430791.62   | 3342562.21   | 7561157.80    | 18487664.68   | 0.64 | 473.94  | 995.16  | 1995.87  | 4608.84  |
| 0.24 | 1094436.69   | 2584732.48   | 5741979.37    | 13880313.58   | 0.65 | 403.35  | 839.66  | 1642.28  | 3744.12  |
| 0.25 | 841240.88    | 1991719.10   | 4390672.91    | 10929536.96   | 0.66 | 339.61  | 699.97  | 1356.67  | 3099.82  |
| 0.26 | 648459.08    | 1567369.99   | 3369420.78    | 8234660.55    | 0.67 | 285.76  | 576.77  | 1137.61  | 2490.59  |
| 0.27 | 508760.90    | 1204834.69   | 2591604.18    | 6327663.59    | 0.68 | 241.37  | 482.29  | 955.75   | 2006.35  |
| 0.28 | 399608.78    | 946511.10    | 2033145.37    | 4906945.33    | 0.69 | 202.49  | 403.41  | 777.92   | 1670.36  |
| 0.29 | 311293.42    | 745029.08    | 1617094.87    | 3847644.92    | 0.70 | 169.62  | 333.78  | 641.76   | 1371.09  |
| 0.30 | 247504.07    | 582180.64    | 1286787.42    | 3092406.03    | 0.71 | 142.71  | 275.36  | 524.70   | 1160.65  |
| 0.31 | 197691.31    | 466107.87    | 1029838.56    | 2515344.42    | 0.72 | 119.91  | 229.39  | 429.60   | 916.88   |
| 0.32 | 158249.36    | 379469.53    | 818824.78     | 1963285.95    | 0.73 | 100.63  | 190.70  | 354.84   | 753.43   |
| 0.33 | 128115.02    | 301908.27    | 650820.80     | 1598785.11    | 0.74 | 83.38   | 156.95  | 286.57   | 623.15   |
| 0.34 | 103438.95    | 243523.66    | 522078.52     | 1270918.80    | 0.75 | 70.22   | 130.42  | 234.58   | 491.76   |
| 0.35 | 83147.07     | 196247.96    | 422124.19     | 1052717.07    | 0.76 | 58.57   | 108.16  | 193.26   | 402.85   |
| 0.36 | 67185.57     | 158041.68    | 342183.63     | 854163.57     | 0.77 | 48.84   | 89.06   | 156.93   | 321.19   |
| 0.37 | 55294.79     | 129376.25    | 282399.01     | 684790.82     | 0.78 | 40.66   | 73.04   | 128.66   | 255.54   |
| 0.38 | 45582.26     | 105918.19    | 228657.74     | 582502.82     | 0.79 | 33.67   | 59.77   | 104.23   | 208.34   |
| 0.39 | 37389.21     | 86893.49     | 188327.64     | 481918.91     | 0.80 | 27.67   | 49.01   | 84.19    | 163.09   |
| 0.40 | 30772.81     | 70871.46     | 153840.91     | 392116.18     | 0.81 | 22.77   | 39.88   | 66.94    | 129.20   |
| 0.41 | 25546.35     | 59238.14     | 127856.93     | 313351.48     | 0.82 | 18.75   | 32.25   | 53.27    | 102.64   |
| 0.42 | 21289.91     | 49338.88     | 106307.70     | 254734.37     | 0.83 | 15.19   | 25.94   | 42.31    | 80.32    |
| 0.43 | 17732.82     | 40957.93     | 88274.45      | 209690.51     | 0.84 | 12.33   | 20.91   | 33.51    | 62.03    |
| 0.44 | 14716.56     | 34086.37     | 72400.05      | 176373.00     | 0.85 | 9.97    | 16.59   | 26.23    | 47.50    |
| 0.45 | 12319.51     | 28353.14     | 60147.32      | 146302.42     | 0.86 | 8.04    | 13.02   | 20.47    | 36.34    |
| 0.46 | 10269.32     | 23717.53     | 49075.45      | 123249.14     | 0.87 | 6.45    | 10.28   | 15.96    | 27.97    |
| 0.47 | 8630.83      | 19821.25     | 40993.85      | 98886.71      | 0.88 | 5.12    | 8.10    | 12.13    | 20.98    |
| 0.48 | 7246.92      | 16426.55     | 33997.20      | 80915.09      | 0.89 | 4.03    | 6.28    | 9.35     | 15.69    |
| 0.49 | 6095.64      | 13426.85     | 28483.69      | 68849.33      | 0.90 | 3.13    | 4.80    | 7.04     | 11.42    |
| 0.50 | 5142.24      | 11365.56     | 24325.01      | 56702.61      |      |         |         |          |          |

Table S121: Critical values for detector  $\hat{H}_{sn}^m$  and IM-OLS estimation in a model with intercept and linear trend. The number of integrated regressors is 1 and the highest power of  $x_{kt}$  is 2.

| m    | 90 %          | 95 %          | 97,5 %         | 99 %           | m    | 90 %    | 95 %     | 97,5 %   | 99 %      |
|------|---------------|---------------|----------------|----------------|------|---------|----------|----------|-----------|
| 0.10 | 1740742198.25 | 6350568185.09 | 18489073754.37 | 62460287793.46 | 0.51 | 4931.60 | 17394.97 | 49791.58 | 152411.61 |
| 0.11 | 912350652.50  | 3437822402.07 | 10074012791.10 | 32612437188.22 | 0.52 | 4033.15 | 14269.43 | 40865.60 | 121895.29 |
| 0.12 | 509934299.94  | 1910894397.76 | 5825552939.40  | 18876990792.36 | 0.53 | 3319.01 | 11632.01 | 33112.53 | 101035.12 |
| 0.13 | 299499211.78  | 1128932975.00 | 3460377968.68  | 11221794194.37 | 0.54 | 2705.93 | 9676.07  | 27355.73 | 80836.66  |
| 0.14 | 176793833.30  | 665786327.57  | 2065124984.17  | 7055594228.50  | 0.55 | 2169.43 | 7652.03  | 21625.64 | 64792.98  |
| 0.15 | 112152542.93  | 411657956.18  | 1222960466.02  | 4288396164.22  | 0.56 | 1761.74 | 6204.86  | 17532.07 | 54378.27  |
| 0.16 | 71777354.73   | 253571017.39  | 761972155.29   | 2615391702.91  | 0.57 | 1385.17 | 4849.04  | 13817.71 | 42791.83  |
| 0.17 | 47989231.89   | 174380173.53  | 494384277.68   | 1610356891.63  | 0.58 | 1125.08 | 3905.59  | 11245.18 | 34629.81  |
| 0.18 | 32235788.21   | 117578183.45  | 336828010.45   | 1141153376.78  | 0.59 | 902.68  | 3141.92  | 8930.06  | 27702.70  |
| 0.19 | 21635472.97   | 79151256.46   | 232484485.62   | 746443824.90   | 0.60 | 725.98  | 2560.04  | 7056.25  | 22121.52  |
| 0.20 | 14896581.66   | 54716947.71   | 159435908.70   | 517309902.20   | 0.61 | 588.82  | 2096.18  | 5795.70  | 17616.88  |
| 0.21 | 10344459.66   | 37918895.10   | 112045823.24   | 366988830.88   | 0.62 | 478.67  | 1634.16  | 4589.63  | 13782.89  |
| 0.22 | 7560862.01    | 26699851.78   | 80409540.99    | 266571459.24   | 0.63 | 385.37  | 1307.89  | 3698.49  | 10938.15  |
| 0.23 | 5390654.91    | 19474032.90   | 57682446.57    | 185713302.92   | 0.64 | 310.24  | 1041.21  | 2916.03  | 8697.29   |
| 0.24 | 3906651.13    | 14201797.46   | 41187590.87    | 133103104.21   | 0.65 | 249.09  | 849.32   | 2319.17  | 6602.35   |
| 0.25 | 2810053.68    | 10140944.94   | 29617728.45    | 101361780.55   | 0.66 | 202.43  | 673.08   | 1809.97  | 5197.16   |
| 0.26 | 2085933.61    | 7502898.76    | 21230020.13    | 72597791.92    | 0.67 | 160.98  | 537.40   | 1434.52  | 4147.30   |
| 0.27 | 1569425.00    | 5648401.36    | 16393160.39    | 52530567.03    | 0.68 | 131.86  | 427.28   | 1127.43  | 3252.39   |
| 0.28 | 1158147.36    | 4235194.26    | 11888708.04    | 37491333.83    | 0.69 | 104.00  | 338.17   | 888.64   | 2580.81   |
| 0.29 | 872277.42     | 3107612.17    | 9037847.16     | 28698432.25    | 0.70 | 83.92   | 262.53   | 681.28   | 2021.97   |
| 0.30 | 671585.90     | 2375242.75    | 6802600.41     | 21720562.84    | 0.71 | 66.25   | 213.93   | 535.64   | 1619.61   |
| 0.31 | 513463.42     | 1813526.74    | 5271816.78     | 16889203.07    | 0.72 | 53.82   | 165.59   | 426.39   | 1254.88   |
| 0.32 | 394433.44     | 1427729.08    | 4090945.80     | 12908060.98    | 0.73 | 42.91   | 129.15   | 329.52   | 930.94    |
| 0.33 | 305863.04     | 1094001.88    | 3124973.77     | 10225095.27    | 0.74 | 34.10   | 101.22   | 259.02   | 737.37    |
| 0.34 | 233783.78     | 853134.11     | 2513232.72     | 7812405.72     | 0.75 | 27.03   | 78.66    | 204.13   | 573.21    |
| 0.35 | 183779.80     | 673389.61     | 1898677.62     | 6312613.79     | 0.76 | 21.50   | 62.99    | 155.82   | 427.85    |
| 0.36 | 145013.76     | 521571.13     | 1514159.58     | 4801238.00     | 0.77 | 16.94   | 49.55    | 117.24   | 325.86    |
| 0.37 | 114488.15     | 411037.47     | 1164672.72     | 3651107.67     | 0.78 | 13.27   | 37.97    | 91.76    | 242.55    |
| 0.38 | 89978.33      | 324511.37     | 941136.14      | 2959385.86     | 0.79 | 10.57   | 29.60    | 69.04    | 189.24    |
| 0.39 | 70365.43      | 250049.22     | 729854.37      | 2340461.40     | 0.80 | 8.40    | 22.82    | 54.66    | 139.90    |
| 0.40 | 55767.57      | 200593.44     | 565968.56      | 1843414.75     | 0.81 | 6.49    | 17.27    | 40.01    | 101.96    |
| 0.41 | 44032.07      | 159112.78     | 457363.54      | 1443797.55     | 0.82 | 5.17    | 12.94    | 30.43    | 78.41     |
| 0.42 | 34966.29      | 128050.72     | 364803.67      | 1149718.80     | 0.83 | 3.99    | 9.83     | 22.45    | 58.17     |
| 0.43 | 28274.19      | 102041.51     | 289949.13      | 909736.23      | 0.84 | 3.12    | 7.29     | 16.65    | 42.82     |
| 0.44 | 22645.22      | 80902.66      | 227461.21      | 710045.02      | 0.85 | 2.40    | 5.58     | 12.42    | 30.17     |
| 0.45 | 18149.70      | 65586.14      | 182940.20      | 555731.95      | 0.86 | 1.86    | 4.12     | 8.74     | 21.78     |
| 0.46 | 14550.20      | 52764.87      | 148628.29      | 453031.15      | 0.87 | 1.40    | 3.03     | 6.33     | 15.16     |
| 0.47 | 11663.24      | 42598.24      | 121653.88      | 352890.98      | 0.88 | 1.06    | 2.17     | 4.38     | 10.21     |
| 0.48 | 9296.91       | 33826.85      | 92629.57       | 281321.76      | 0.89 | 0.80    | 1.57     | 3.08     | 6.88      |
| 0.49 | 7713.73       | 27241.70      | 76952.74       | 221958.89      | 0.90 | 0.59    | 1.13     | 2.09     | 4.70      |
| 0.50 | 6184.98       | 21811.08      | 62891.00       | 186117.54      |      |         |          |          |           |

Table S122: Critical values for detector  $\hat{H}_{sn}^m$  and FM-OLS and D-OLS estimation in a model with intercept. The number of integrated regressors is 1 and the highest power of  $x_{kt}$  is 3.

| m    | 90 %           | 95 %           | 97,5 %          | 99 %             | m    | 90 %     | 95 %      | 97,5 %    | 99 %       |
|------|----------------|----------------|-----------------|------------------|------|----------|-----------|-----------|------------|
| 0.10 | 22063192397.33 | 90424705510.06 | 292808825954.63 | 1066239683633.51 | 0.51 | 58213.13 | 218827.86 | 668224.55 | 2402317.82 |
| 0.11 | 11813299236.97 | 48158034282.35 | 155118868497.06 | 565244080578.39  | 0.52 | 47301.82 | 177030.21 | 549451.20 | 1975149.72 |
| 0.12 | 6702310058.10  | 27038173345.51 | 85841824448.75  | 298523442892.04  | 0.53 | 37616.17 | 143313.86 | 438644.36 | 1600982.15 |
| 0.13 | 3874540739.19  | 15697697428.92 | 50250028556.83  | 178158637517.10  | 0.54 | 30531.64 | 117016.83 | 356845.63 | 1306684.31 |
| 0.14 | 2323430087.76  | 9531114853.92  | 30508549111.04  | 106295031561.92  | 0.55 | 24815.54 | 94538.12  | 285896.77 | 1020120.76 |
| 0.15 | 1475737769.82  | 5906292758.88  | 18779888593.19  | 68724294964.77   | 0.56 | 20042.26 | 75527.79  | 233253.17 | 788367.04  |
| 0.16 | 936816725.91   | 3690206502.58  | 11858982356.14  | 42145814009.98   | 0.57 | 16083.17 | 61422.85  | 188563.52 | 627716.87  |
| 0.17 | 600925309.19   | 2425493936.52  | 7971151146.98   | 28033288028.76   | 0.58 | 13094.70 | 49637.37  | 150843.40 | 497711.91  |
| 0.18 | 400686649.56   | 1631726332.94  | 5274214487.16   | 19564947673.90   | 0.59 | 10338.00 | 39544.94  | 120656.36 | 417358.69  |
| 0.19 | 275587322.46   | 1090541714.33  | 3576553907.36   | 13018785402.15   | 0.60 | 8434.86  | 31501.24  | 97425.67  | 327007.55  |
| 0.20 | 185820421.68   | 753509595.93   | 2373784514.76   | 8999816335.39    | 0.61 | 6714.88  | 24983.64  | 76656.51  | 264458.41  |
| 0.21 | 130244850.20   | 523887236.42   | 1683200400.99   | 6235120429.12    | 0.62 | 5507.75  | 20294.23  | 61836.87  | 207413.79  |
| 0.22 | 93599606.77    | 379057242.41   | 1185994983.40   | 4478346511.78    | 0.63 | 4468.83  | 16115.65  | 48199.26  | 166684.54  |
| 0.23 | 68046203.87    | 273862999.23   | 862500625.86    | 3196847792.12    | 0.64 | 3513.48  | 12760.68  | 38381.97  | 127889.11  |
| 0.24 | 49729287.25    | 196222351.05   | 612267619.44    | 2226355089.18    | 0.65 | 2836.37  | 10248.50  | 29850.22  | 100694.68  |
| 0.25 | 36007838.11    | 141123335.37   | 438362724.33    | 1604122787.70    | 0.66 | 2276.40  | 8167.33   | 23490.74  | 80579.50   |
| 0.26 | 26441155.05    | 105028400.70   | 324981330.97    | 1132120078.74    | 0.67 | 1800.87  | 6448.07   | 18518.05  | 61415.37   |
| 0.27 | 19309901.80    | 77627995.36    | 241639826.37    | 857451919.00     | 0.68 | 1451.55  | 5257.18   | 14646.36  | 48025.10   |
| 0.28 | 14532895.64    | 56577170.57    | 181170781.01    | 631594113.99     | 0.69 | 1164.43  | 4205.86   | 11673.19  | 37016.65   |
| 0.29 | 10869633.02    | 42451386.88    | 133625695.24    | 468563004.29     | 0.70 | 932.11   | 3292.19   | 9253.29   | 29210.12   |
| 0.30 | 8120234.80     | 32332940.42    | 101349900.18    | 346609576.17     | 0.71 | 730.99   | 2584.70   | 7400.24   | 22849.25   |
| 0.31 | 6267208.03     | 25418788.51    | 80175582.69     | 278855808.38     | 0.72 | 581.26   | 2032.17   | 5749.31   | 17776.94   |
| 0.32 | 4879028.42     | 19590657.91    | 62217309.33     | 214170057.31     | 0.73 | 457.90   | 1581.10   | 4576.46   | 14253.67   |
| 0.33 | 3760090.38     | 15177246.32    | 47018896.03     | 169872011.72     | 0.74 | 364.07   | 1253.02   | 3481.22   | 11151.36   |
| 0.34 | 2882605.13     | 11822686.28    | 36425152.42     | 130136291.39     | 0.75 | 287.08   | 986.26    | 2677.29   | 8330.42    |
| 0.35 | 2268547.88     | 9187295.59     | 28395820.37     | 100873858.60     | 0.76 | 225.87   | 751.25    | 2044.91   | 6334.43    |
| 0.36 | 1775148.28     | 7240132.46     | 22691103.15     | 79128204.06      | 0.77 | 174.40   | 578.16    | 1574.88   | 4891.23    |
| 0.37 | 1394971.55     | 5621143.92     | 17334342.84     | 62439421.29      | 0.78 | 134.92   | 446.53    | 1211.86   | 3692.18    |
| 0.38 | 1094100.05     | 4440004.25     | 13817523.81     | 49129194.87      | 0.79 | 104.11   | 343.21    | 929.03    | 2737.98    |
| 0.39 | 866536.40      | 3555431.33     | 11031971.17     | 39348555.54      | 0.80 | 78.75    | 262.33    | 706.29    | 2084.99    |
| 0.40 | 689593.46      | 2751864.15     | 8688589.25      | 31029214.77      | 0.81 | 61.30    | 198.92    | 530.40    | 1570.95    |
| 0.41 | 542307.14      | 2147221.06     | 6818758.25      | 24575037.06      | 0.82 | 47.24    | 151.54    | 406.04    | 1188.78    |
| 0.42 | 431272.01      | 1700861.77     | 5364998.72      | 19030618.71      | 0.83 | 36.05    | 112.27    | 297.62    | 879.91     |
| 0.43 | 344244.33      | 1346841.77     | 4244234.38      | 14713224.76      | 0.84 | 27.31    | 83.05     | 219.27    | 645.06     |
| 0.44 | 271004.22      | 1064445.21     | 3395159.31      | 11744795.61      | 0.85 | 20.13    | 60.63     | 156.46    | 459.73     |
| 0.45 | 217992.40      | 851349.81      | 2665775.14      | 9315566.29       | 0.86 | 15.16    | 43.97     | 112.30    | 322.22     |
| 0.46 | 174024.17      | 680114.99      | 2114959.75      | 7258666.24       | 0.87 | 11.20    | 31.47     | 78.06     | 224.75     |
| 0.47 | 140227.54      | 540494.64      | 1673028.72      | 5828196.16       | 0.88 | 8.29     | 22.32     | 54.11     | 147.13     |
| 0.48 | 112139.47      | 430934.32      | 1337754.32      | 4645951.04       | 0.89 | 6.03     | 15.74     | 36.99     | 99.42      |
| 0.49 | 89216.63       | 340112.38      | 1054137.15      | 3714349.13       | 0.90 | 4.35     | 10.83     | 24.60     | 66.15      |
| 0.50 | 71597.41       | 273351.12      | 833384.44       | 2977155.48       |      |          |           |           |            |

Table S123: Critical values for detector  $\hat{H}_{sn}^m$  and IM-OLS estimation in a model with intercept. The number of integrated regressors is 1 and the highest power of  $x_{kt}$  is 3.

| m    | 90 %          | 95 %           | 97,5 %         | 99 %            | m    | 90 %    | 95 %     | 97,5 %   | 99 %      |
|------|---------------|----------------|----------------|-----------------|------|---------|----------|----------|-----------|
| 0.10 | 4335188784.83 | 15243909093.14 | 42594806262.53 | 138498017002.31 | 0.51 | 9889.57 | 33182.50 | 93880.22 | 296735.53 |
| 0.11 | 2303629448.96 | 8207847457.10  | 22914719386.78 | 72915912371.17  | 0.52 | 7956.56 | 27642.36 | 76751.20 | 233720.46 |
| 0.12 | 1272861246.79 | 4508494728.75  | 12949813648.08 | 41450456265.25  | 0.53 | 6580.40 | 22546.98 | 61690.87 | 187083.21 |
| 0.13 | 738559480.35  | 2614776391.42  | 7639143954.12  | 23828233080.54  | 0.54 | 5418.64 | 18865.35 | 50878.90 | 155363.68 |
| 0.14 | 436726258.96  | 1511583579.99  | 4613632415.56  | 14776698861.36  | 0.55 | 4324.57 | 15005.46 | 40259.42 | 124469.50 |
| 0.15 | 268882825.81  | 923146439.95   | 2707111307.12  | 9084492940.50   | 0.56 | 3543.07 | 11896.50 | 32634.05 | 102365.82 |
| 0.16 | 170764072.40  | 583130777.68   | 1656981502.49  | 5475045321.29   | 0.57 | 2785.43 | 9469.49  | 26180.76 | 77456.63  |
| 0.17 | 112416426.93  | 384400022.47   | 1062573701.46  | 3524483456.13   | 0.58 | 2243.46 | 7557.93  | 20961.72 | 64222.79  |
| 0.18 | 73488980.59   | 255826368.54   | 709270146.05   | 2415081343.78   | 0.59 | 1812.14 | 5952.94  | 16830.45 | 51827.00  |
| 0.19 | 49511601.92   | 172266990.22   | 481813398.78   | 1635535950.92   | 0.60 | 1457.56 | 4797.79  | 13384.36 | 41633.10  |
| 0.20 | 33813946.42   | 118449872.32   | 332035810.26   | 1060262077.00   | 0.61 | 1194.20 | 3990.32  | 10664.01 | 32405.02  |
| 0.21 | 23252532.84   | 82365666.22    | 234197133.53   | 751764552.61    | 0.62 | 938.14  | 3153.40  | 8666.96  | 25950.35  |
| 0.22 | 16252317.40   | 58708120.00    | 165254545.51   | 532473996.70    | 0.63 | 769.31  | 2510.60  | 6772.24  | 20747.17  |
| 0.23 | 11834494.79   | 41735897.37    | 116943406.37   | 374537524.13    | 0.64 | 616.63  | 2053.10  | 5458.20  | 16347.96  |
| 0.24 | 8421460.41    | 29551610.88    | 83362729.99    | 265909987.77    | 0.65 | 504.49  | 1605.21  | 4331.26  | 12578.30  |
| 0.25 | 6002420.63    | 21284247.65    | 60504425.52    | 194100078.97    | 0.66 | 408.40  | 1302.16  | 3381.88  | 9707.42   |
| 0.26 | 4403868.25    | 15613594.25    | 44756026.36    | 140350044.98    | 0.67 | 328.08  | 1014.42  | 2762.69  | 7658.08   |
| 0.27 | 3354319.76    | 11691207.42    | 33217627.84    | 99969833.65     | 0.68 | 267.67  | 812.51   | 2126.61  | 5987.11   |
| 0.28 | 2469528.27    | 8688563.70     | 24431033.42    | 74105221.74     | 0.69 | 211.50  | 642.34   | 1670.20  | 4912.15   |
| 0.29 | 1851283.18    | 6389090.43     | 18130566.33    | 56826938.13     | 0.70 | 169.74  | 507.89   | 1304.65  | 3709.87   |
| 0.30 | 1405422.58    | 4858034.09     | 13686211.14    | 43028434.52     | 0.71 | 137.53  | 404.61   | 1012.97  | 2992.46   |
| 0.31 | 1074772.11    | 3750060.52     | 10408419.41    | 32781407.38     | 0.72 | 108.63  | 320.39   | 795.98   | 2400.84   |
| 0.32 | 826138.94     | 2913526.28     | 8019283.23     | 25139044.03     | 0.73 | 87.40   | 249.81   | 607.73   | 1788.24   |
| 0.33 | 623036.31     | 2269185.53     | 6118480.09     | 19297086.23     | 0.74 | 70.00   | 197.48   | 483.90   | 1363.90   |
| 0.34 | 485475.59     | 1736439.90     | 4807353.29     | 15479873.31     | 0.75 | 56.25   | 156.19   | 376.77   | 1038.37   |
| 0.35 | 376456.82     | 1340641.08     | 3743188.57     | 12525979.12     | 0.76 | 45.35   | 118.99   | 293.66   | 773.55    |
| 0.36 | 295537.59     | 1052992.07     | 3014877.66     | 9550940.10      | 0.77 | 36.14   | 93.22    | 224.68   | 607.76    |
| 0.37 | 230850.22     | 809554.90      | 2310807.99     | 7100748.90      | 0.78 | 28.73   | 72.50    | 166.89   | 446.45    |
| 0.38 | 179140.81     | 639650.02      | 1855761.66     | 5793000.38      | 0.79 | 22.43   | 56.02    | 130.82   | 343.86    |
| 0.39 | 141471.45     | 495277.43      | 1410396.45     | 4489234.74      | 0.80 | 17.89   | 43.41    | 99.90    | 257.21    |
| 0.40 | 111884.90     | 389093.76      | 1111862.63     | 3518711.48      | 0.81 | 13.93   | 32.89    | 73.28    | 198.12    |
| 0.41 | 88280.67      | 314508.58      | 878642.94      | 2756061.63      | 0.82 | 11.03   | 25.17    | 55.11    | 142.84    |
| 0.42 | 69890.93      | 245238.35      | 694690.98      | 2127196.64      | 0.83 | 8.46    | 18.86    | 40.71    | 104.03    |
| 0.43 | 56870.40      | 195010.95      | 550138.63      | 1676311.75      | 0.84 | 6.57    | 14.04    | 30.67    | 74.48     |
| 0.44 | 45198.53      | 156309.86      | 434510.12      | 1347772.62      | 0.85 | 5.07    | 10.53    | 22.29    | 53.22     |
| 0.45 | 36597.76      | 126580.09      | 353672.29      | 1119600.92      | 0.86 | 3.82    | 7.86     | 16.27    | 39.52     |
| 0.46 | 28920.52      | 101433.77      | 287606.77      | 857135.67       | 0.87 | 2.92    | 5.78     | 11.58    | 26.85     |
| 0.47 | 23343.30      | 81927.05       | 229947.34      | 710245.09       | 0.88 | 2.13    | 4.14     | 7.98     | 18.14     |
| 0.48 | 18938.44      | 64139.82       | 177586.64      | 559293.36       | 0.89 | 1.60    | 2.97     | 5.62     | 12.25     |
| 0.49 | 15350.33      | 52080.69       | 145447.69      | 434431.58       | 0.90 | 1.16    | 2.09     | 3.75     | 8.17      |
| 0.50 | 12306.81      | 41707.32       | 119271.23      | 366925.36       |      |         |          |          |           |

Table S124: Critical values for detector  $\hat{H}_{sn}^m$  and FM-OLS and D-OLS estimation in a model with intercept and linear trend. The number of integrated regressors is 1 and the highest power of  $x_{kt}$  is 3.

| m    | 90 %           | 95 %            | 97,5 %          | 99 %             | m    | 90 %     | 95 %      | 97,5 %    | 99 %       |
|------|----------------|-----------------|-----------------|------------------|------|----------|-----------|-----------|------------|
| 0.10 | 31705789424.13 | 118058989597.43 | 370999148065.00 | 1252591996649.53 | 0.51 | 63468.28 | 242533.59 | 729510.74 | 2520459.53 |
| 0.11 | 16551289949.09 | 62405036069.76  | 198662333597.62 | 667815854069.66  | 0.52 | 51684.24 | 194596.24 | 573165.33 | 1992152.50 |
| 0.12 | 9267998088.48  | 34305750584.15  | 108591819259.14 | 382858766288.87  | 0.53 | 41138.61 | 156147.03 | 456488.58 | 1639457.32 |
| 0.13 | 5277862866.75  | 19913837637.51  | 60987265588.37  | 213188073876.24  | 0.54 | 33489.27 | 125296.04 | 369088.18 | 1290182.36 |
| 0.14 | 3088289260.90  | 11906995981.96  | 37366050101.54  | 125398813730.27  | 0.55 | 26892.79 | 101415.13 | 306911.25 | 1058199.87 |
| 0.15 | 1922904004.90  | 7388746531.51   | 22327004071.75  | 76879981446.51   | 0.56 | 22035.36 | 81844.64  | 253171.88 | 818951.80  |
| 0.16 | 1189183333.02  | 4525407948.62   | 13996543446.26  | 48969378014.02   | 0.57 | 17942.02 | 66613.12  | 199898.60 | 679595.15  |
| 0.17 | 768318788.53   | 2963267525.12   | 9100440295.48   | 31705851399.31   | 0.58 | 14497.86 | 52641.21  | 158364.85 | 537590.30  |
| 0.18 | 516779004.82   | 1955738637.03   | 6039900236.83   | 21236659369.60   | 0.59 | 11385.76 | 41673.95  | 124752.90 | 430888.62  |
| 0.19 | 348415757.92   | 1300161366.85   | 4003168632.54   | 14618619907.89   | 0.60 | 9186.11  | 33096.81  | 99796.18  | 341218.95  |
| 0.20 | 234095906.40   | 905094733.13    | 2759504751.44   | 9971364294.97    | 0.61 | 7332.08  | 26815.52  | 79556.29  | 271475.80  |
| 0.21 | 161704293.26   | 616994471.83    | 1930984640.24   | 7124088789.04    | 0.62 | 5985.44  | 21625.92  | 62570.09  | 208689.00  |
| 0.22 | 114028389.31   | 429947234.42    | 1364084115.22   | 5028128652.63    | 0.63 | 4896.42  | 17281.47  | 49135.41  | 162736.41  |
| 0.23 | 82903417.05    | 307291367.30    | 965328887.16    | 3359312986.18    | 0.64 | 3866.45  | 13795.20  | 39988.51  | 127904.63  |
| 0.24 | 59432346.28    | 217871090.96    | 677144225.92    | 2386319612.00    | 0.65 | 3135.89  | 11087.75  | 31567.97  | 100140.62  |
| 0.25 | 42589530.69    | 161250437.84    | 489746354.29    | 1635995511.91    | 0.66 | 2519.71  | 8731.66   | 24499.85  | 80858.83   |
| 0.26 | 31491643.41    | 120298553.48    | 355810003.59    | 1230568534.01    | 0.67 | 2022.25  | 6853.25   | 19481.87  | 62403.62   |
| 0.27 | 22846133.90    | 87445626.81     | 258704206.69    | 876476741.45     | 0.68 | 1623.65  | 5507.72   | 15397.75  | 48394.36   |
| 0.28 | 17184202.74    | 64685273.00     | 192408251.61    | 642630178.05     | 0.69 | 1299.42  | 4418.54   | 12080.06  | 38056.65   |
| 0.29 | 12760647.34    | 48496152.15     | 145157855.20    | 477954260.96     | 0.70 | 1030.07  | 3484.89   | 9666.96   | 31291.57   |
| 0.30 | 9540066.09     | 36794415.43     | 111196403.05    | 374047117.14     | 0.71 | 802.59   | 2756.11   | 7699.51   | 23907.55   |
| 0.31 | 7251961.19     | 28817876.18     | 85318770.18     | 281008900.33     | 0.72 | 640.48   | 2162.79   | 6001.01   | 19207.61   |
| 0.32 | 5592315.13     | 21841586.81     | 66114644.23     | 214596641.14     | 0.73 | 509.60   | 1694.17   | 4699.07   | 14773.80   |
| 0.33 | 4365005.65     | 16555944.02     | 50913523.42     | 182085990.26     | 0.74 | 405.23   | 1331.12   | 3556.27   | 11394.21   |
| 0.34 | 3405282.01     | 12865694.14     | 38528226.28     | 133601984.46     | 0.75 | 320.02   | 1033.04   | 2842.15   | 8572.86    |
| 0.35 | 2609262.65     | 10070409.02     | 30360164.40     | 106697644.40     | 0.76 | 252.82   | 814.98    | 2229.28   | 6513.62    |
| 0.36 | 2053279.33     | 7846686.95      | 23759549.74     | 83601769.76      | 0.77 | 198.21   | 629.99    | 1707.42   | 5006.75    |
| 0.37 | 1580822.65     | 6035384.53      | 18703499.60     | 67356397.38      | 0.78 | 153.51   | 488.86    | 1278.20   | 3892.63    |
| 0.38 | 1239947.28     | 4798254.82      | 14835231.58     | 53072326.13      | 0.79 | 120.90   | 372.07    | 978.93    | 2898.61    |
| 0.39 | 980737.96      | 3747576.79      | 11408731.16     | 42268246.80      | 0.80 | 93.89    | 278.03    | 739.63    | 2194.83    |
| 0.40 | 775305.16      | 2919282.96      | 9016478.79      | 33454768.15      | 0.81 | 72.49    | 209.39    | 567.81    | 1660.09    |
| 0.41 | 613700.60      | 2329808.83      | 7035124.15      | 26180461.70      | 0.82 | 55.56    | 160.03    | 412.66    | 1230.57    |
| 0.42 | 483961.24      | 1808753.67      | 5671816.15      | 20778703.05      | 0.83 | 42.41    | 120.99    | 307.89    | 906.40     |
| 0.43 | 384269.60      | 1458862.32      | 4527776.27      | 15671569.68      | 0.84 | 31.83    | 89.35     | 228.67    | 663.22     |
| 0.44 | 307161.78      | 1150666.34      | 3520130.46      | 12253390.86      | 0.85 | 24.47    | 64.82     | 163.94    | 460.71     |
| 0.45 | 244352.47      | 916186.17       | 2775602.36      | 10030424.13      | 0.86 | 18.33    | 47.98     | 118.96    | 323.35     |
| 0.46 | 194369.05      | 731047.62       | 2212784.26      | 7995043.15       | 0.87 | 13.78    | 34.24     | 81.70     | 223.69     |
| 0.47 | 156982.30      | 579637.76       | 1787909.67      | 6355976.82       | 0.88 | 10.30    | 24.30     | 56.62     | 151.83     |
| 0.48 | 126782.74      | 464051.87       | 1415238.50      | 5039900.10       | 0.89 | 7.63     | 17.06     | 37.76     | 102.41     |
| 0.49 | 99641.28       | 373677.24       | 1140024.53      | 3889275.68       | 0.90 | 5.58     | 11.87     | 25.39     | 65.73      |
| 0.50 | 77963.56       | 306098.27       | 901324.17       | 3172866.59       |      |          |           |           |            |

Table S125: Critical values for detector  $\hat{H}_{sn}^m$  and IM-OLS estimation in a model with intercept and linear trend. The number of integrated regressors is 1 and the highest power of  $x_{kt}$  is 3.

### 3.2 Number of I(1) regressors: 2

| m    | 90 %      | 95 %       | 97,5 %     | 99 %       | m    | 90 %   | 95 %   | 97,5 % | 99 %   |
|------|-----------|------------|------------|------------|------|--------|--------|--------|--------|
| 0.10 | 724286.36 | 1337554.36 | 2186998.75 | 3723079.29 | 0.51 | 174.95 | 300.01 | 470.03 | 781.14 |
| 0.11 | 478375.44 | 872340.01  | 1434783.68 | 2452038.90 | 0.52 | 152.45 | 264.70 | 414.74 | 688.60 |
| 0.12 | 322822.64 | 593192.82  | 974347.07  | 1673638.45 | 0.53 | 133.22 | 229.03 | 361.71 | 599.88 |
| 0.13 | 225413.94 | 415340.79  | 691821.30  | 1226745.79 | 0.54 | 116.82 | 199.62 | 311.65 | 516.88 |
| 0.14 | 160380.14 | 298597.22  | 500582.05  | 878089.62  | 0.55 | 102.26 | 174.80 | 273.32 | 448.83 |
| 0.15 | 117477.29 | 217124.07  | 365533.64  | 637412.26  | 0.56 | 89.49  | 151.73 | 233.77 | 376.71 |
| 0.16 | 87090.36  | 160651.76  | 269982.92  | 461898.00  | 0.57 | 78.48  | 131.56 | 205.74 | 327.87 |
| 0.17 | 66180.91  | 120620.41  | 202776.72  | 355484.81  | 0.58 | 68.92  | 114.79 | 178.29 | 285.89 |
| 0.18 | 51078.16  | 92294.79   | 151632.98  | 272003.06  | 0.59 | 60.45  | 101.08 | 154.16 | 250.75 |
| 0.19 | 39068.04  | 70962.30   | 115770.58  | 212797.45  | 0.60 | 52.92  | 88.48  | 134.58 | 221.17 |
| 0.20 | 30589.79  | 55732.52   | 91626.33   | 159749.73  | 0.61 | 46.42  | 77.38  | 117.53 | 191.09 |
| 0.21 | 24394.32  | 44166.83   | 73296.06   | 126418.20  | 0.62 | 40.58  | 67.05  | 101.51 | 169.65 |
| 0.22 | 19356.22  | 35455.34   | 57508.47   | 99305.20   | 0.63 | 35.66  | 59.02  | 90.09  | 143.99 |
| 0.23 | 15660.31  | 28539.21   | 45453.33   | 79016.41   | 0.64 | 31.08  | 51.81  | 78.78  | 124.65 |
| 0.24 | 12586.01  | 23016.86   | 37879.31   | 64718.14   | 0.65 | 27.12  | 45.09  | 68.60  | 109.89 |
| 0.25 | 10290.71  | 18769.78   | 30858.26   | 52304.58   | 0.66 | 23.60  | 38.96  | 59.13  | 94.51  |
| 0.26 | 8452.29   | 15370.05   | 25041.24   | 43146.88   | 0.67 | 20.75  | 34.03  | 51.08  | 80.48  |
| 0.27 | 7034.48   | 12559.64   | 20401.04   | 35276.43   | 0.68 | 17.98  | 29.26  | 44.30  | 69.54  |
| 0.28 | 5821.60   | 10401.00   | 16785.85   | 29128.48   | 0.69 | 15.60  | 25.23  | 38.43  | 60.19  |
| 0.29 | 4815.91   | 8682.19    | 14043.43   | 23731.96   | 0.70 | 13.63  | 22.10  | 33.27  | 52.00  |
| 0.30 | 3986.85   | 7234.24    | 11792.78   | 19726.11   | 0.71 | 11.84  | 19.14  | 28.76  | 45.75  |
| 0.31 | 3328.96   | 6073.06    | 9765.76    | 16487.38   | 0.72 | 10.30  | 16.59  | 24.95  | 39.47  |
| 0.32 | 2819.66   | 5068.34    | 8266.16    | 13849.18   | 0.73 | 8.92   | 14.33  | 21.44  | 33.56  |
| 0.33 | 2372.99   | 4328.66    | 6990.15    | 11748.21   | 0.74 | 7.67   | 12.28  | 18.17  | 28.70  |
| 0.34 | 2047.05   | 3645.93    | 5976.41    | 10172.46   | 0.75 | 6.69   | 10.64  | 15.79  | 24.12  |
| 0.35 | 1732.51   | 3104.54    | 5048.34    | 8494.43    | 0.76 | 5.75   | 9.10   | 13.40  | 20.34  |
| 0.36 | 1493.16   | 2670.94    | 4258.68    | 7184.73    | 0.77 | 4.90   | 7.78   | 11.32  | 17.33  |
| 0.37 | 1282.53   | 2281.70    | 3647.63    | 6205.70    | 0.78 | 4.21   | 6.64   | 9.73   | 14.74  |
| 0.38 | 1095.49   | 1947.99    | 3099.96    | 5221.72    | 0.79 | 3.57   | 5.62   | 8.15   | 12.27  |
| 0.39 | 950.12    | 1683.06    | 2671.86    | 4427.86    | 0.80 | 3.03   | 4.78   | 6.96   | 10.28  |
| 0.40 | 810.45    | 1433.93    | 2280.50    | 3760.38    | 0.81 | 2.57   | 3.99   | 5.76   | 8.70   |
| 0.41 | 707.00    | 1241.14    | 1972.00    | 3232.51    | 0.82 | 2.15   | 3.36   | 4.84   | 7.14   |
| 0.42 | 614.04    | 1075.89    | 1723.40    | 2852.25    | 0.83 | 1.80   | 2.81   | 4.02   | 5.97   |
| 0.43 | 532.63    | 936.55     | 1494.41    | 2508.64    | 0.84 | 1.49   | 2.34   | 3.36   | 4.96   |
| 0.44 | 465.09    | 808.24     | 1291.01    | 2127.05    | 0.85 | 1.23   | 1.92   | 2.73   | 4.07   |
| 0.45 | 402.03    | 692.29     | 1106.41    | 1872.54    | 0.86 | 1.01   | 1.56   | 2.20   | 3.26   |
| 0.46 | 345.22    | 599.35     | 958.30     | 1584.50    | 0.87 | 0.82   | 1.26   | 1.80   | 2.60   |
| 0.47 | 302.15    | 520.09     | 826.31     | 1401.14    | 0.88 | 0.65   | 1.01   | 1.42   | 2.06   |
| 0.48 | 262.14    | 454.04     | 710.52     | 1200.08    | 0.89 | 0.51   | 0.80   | 1.12   | 1.64   |
| 0.49 | 227.28    | 398.04     | 627.08     | 1033.03    | 0.90 | 0.40   | 0.61   | 0.86   | 1.25   |
| 0.50 | 199.96    | 347.40     | 542.95     | 906.59     |      |        |        |        |        |

Table S126: Critical values for detector  $\hat{H}_{sn}^m$  and FM-OLS and D-OLS estimation in a model with intercept. The number of integrated regressors is 2 and the highest power of  $x_{kt}$  is 1.

| m    | 90 %       | 95 %       | 97,5 %     | 99 %        | m    | 90 %   | 95 %    | 97,5 %  | 99 %    |
|------|------------|------------|------------|-------------|------|--------|---------|---------|---------|
| 0.10 | 3048481.50 | 5580626.49 | 9132548.38 | 15877521.24 | 0.51 | 690.36 | 1182.92 | 1862.39 | 3069.42 |
| 0.11 | 1985409.68 | 3607823.31 | 5943815.03 | 10208405.67 | 0.52 | 605.71 | 1022.35 | 1610.22 | 2655.05 |
| 0.12 | 1345669.57 | 2468942.84 | 4040440.50 | 6865005.23  | 0.53 | 530.95 | 887.60  | 1400.82 | 2301.92 |
| 0.13 | 938627.19  | 1725446.48 | 2867922.91 | 4870275.48  | 0.54 | 462.26 | 781.75  | 1217.29 | 2011.63 |
| 0.14 | 674082.37  | 1231514.91 | 2061302.04 | 3514766.03  | 0.55 | 406.29 | 682.00  | 1061.13 | 1735.55 |
| 0.15 | 494542.10  | 900042.79  | 1481212.10 | 2576191.48  | 0.56 | 355.48 | 592.38  | 912.34  | 1504.19 |
| 0.16 | 366923.73  | 670881.82  | 1100928.73 | 1901927.07  | 0.57 | 310.80 | 514.93  | 792.35  | 1305.60 |
| 0.17 | 275427.65  | 502850.88  | 821741.44  | 1406705.39  | 0.58 | 271.49 | 451.24  | 695.30  | 1126.30 |
| 0.18 | 210526.21  | 379436.29  | 625233.08  | 1090679.18  | 0.59 | 239.05 | 397.40  | 603.32  | 967.95  |
| 0.19 | 163024.94  | 293495.83  | 483542.65  | 835146.27   | 0.60 | 207.93 | 346.37  | 527.92  | 839.67  |
| 0.20 | 128668.30  | 232223.75  | 377312.36  | 646340.93   | 0.61 | 182.33 | 304.72  | 460.73  | 734.03  |
| 0.21 | 101358.23  | 183421.09  | 295301.98  | 516223.98   | 0.62 | 160.92 | 263.82  | 401.35  | 634.39  |
| 0.22 | 80557.90   | 146747.10  | 236716.63  | 414980.02   | 0.63 | 141.05 | 229.87  | 349.69  | 557.65  |
| 0.23 | 65242.05   | 117803.81  | 191369.14  | 328919.83   | 0.64 | 123.16 | 200.27  | 302.89  | 480.39  |
| 0.24 | 52559.98   | 94750.15   | 155191.70  | 260298.85   | 0.65 | 107.62 | 174.75  | 264.45  | 415.01  |
| 0.25 | 42647.84   | 76335.89   | 128091.19  | 216577.87   | 0.66 | 94.01  | 152.12  | 230.20  | 360.49  |
| 0.26 | 34947.32   | 63193.28   | 104580.46  | 175161.93   | 0.67 | 82.14  | 132.89  | 198.63  | 313.74  |
| 0.27 | 28687.30   | 52257.35   | 83859.40   | 144404.77   | 0.68 | 71.74  | 115.21  | 172.16  | 272.26  |
| 0.28 | 23801.92   | 42728.94   | 69169.80   | 120181.03   | 0.69 | 62.71  | 100.27  | 148.83  | 234.47  |
| 0.29 | 19805.32   | 35407.27   | 57009.96   | 99576.54    | 0.70 | 54.78  | 86.84   | 129.20  | 201.82  |
| 0.30 | 16586.26   | 29567.74   | 46971.62   | 81106.72    | 0.71 | 47.67  | 75.58   | 110.97  | 172.10  |
| 0.31 | 13869.09   | 24782.55   | 39124.43   | 67919.09    | 0.72 | 41.38  | 65.80   | 96.18   | 147.63  |
| 0.32 | 11552.77   | 20741.08   | 32793.93   | 56200.29    | 0.73 | 36.01  | 56.81   | 83.04   | 126.41  |
| 0.33 | 9749.50    | 17399.24   | 27778.50   | 47405.00    | 0.74 | 31.34  | 48.80   | 71.31   | 107.43  |
| 0.34 | 8251.38    | 14742.71   | 23474.12   | 39873.22    | 0.75 | 26.98  | 42.10   | 61.28   | 91.53   |
| 0.35 | 6992.15    | 12376.20   | 19794.55   | 33691.80    | 0.76 | 23.29  | 36.37   | 52.43   | 78.28   |
| 0.36 | 5960.64    | 10507.56   | 16919.75   | 28520.58    | 0.77 | 20.06  | 31.12   | 44.56   | 66.88   |
| 0.37 | 5103.08    | 9039.02    | 14316.54   | 24329.47    | 0.78 | 17.35  | 26.55   | 37.88   | 56.08   |
| 0.38 | 4396.87    | 7678.33    | 12189.89   | 20773.75    | 0.79 | 14.95  | 22.62   | 32.11   | 47.22   |
| 0.39 | 3804.11    | 6573.31    | 10487.97   | 17791.76    | 0.80 | 12.77  | 19.26   | 27.04   | 39.84   |
| 0.40 | 3276.72    | 5650.15    | 8952.15    | 15051.57    | 0.81 | 10.90  | 16.44   | 22.73   | 33.22   |
| 0.41 | 2818.86    | 4861.16    | 7726.42    | 12726.25    | 0.82 | 9.23   | 13.86   | 19.16   | 27.42   |
| 0.42 | 2434.48    | 4254.16    | 6673.85    | 11046.43    | 0.83 | 7.83   | 11.70   | 15.95   | 22.62   |
| 0.43 | 2114.46    | 3652.00    | 5805.26    | 9442.69     | 0.84 | 6.58   | 9.75    | 13.32   | 18.70   |
| 0.44 | 1833.13    | 3171.68    | 5017.81    | 8219.39     | 0.85 | 5.51   | 8.13    | 11.08   | 15.41   |
| 0.45 | 1582.92    | 2771.92    | 4330.98    | 7135.54     | 0.86 | 4.62   | 6.70    | 9.12    | 12.69   |
| 0.46 | 1377.86    | 2378.96    | 3745.10    | 6269.84     | 0.87 | 3.81   | 5.53    | 7.45    | 10.38   |
| 0.47 | 1197.52    | 2069.00    | 3259.66    | 5431.64     | 0.88 | 3.12   | 4.50    | 6.09    | 8.41    |
| 0.48 | 1038.07    | 1809.41    | 2814.36    | 4694.10     | 0.89 | 2.54   | 3.65    | 4.91    | 6.74    |
| 0.49 | 903.85     | 1568.67    | 2436.70    | 4105.29     | 0.90 | 2.06   | 2.94    | 3.88    | 5.32    |
| 0.50 | 788.05     | 1355.09    | 2136.67    | 3531.10     |      |        |         |         |         |

Table S127: Critical values for detector  $\hat{H}_{sn}^m$  and IM-OLS estimation in a model with intercept. The number of integrated regressors is 2 and the highest power of  $x_{kt}$  is 1.



| m    | 90 %        | 95 %        | 97,5 %      | 99 %        | m    | 90 %   | 95 %    | 97,5 %  | 99 %    |
|------|-------------|-------------|-------------|-------------|------|--------|---------|---------|---------|
| 0.10 | 16552092.63 | 27989632.53 | 42912585.76 | 70491693.68 | 0.51 | 752.72 | 1227.33 | 1873.49 | 2976.37 |
| 0.11 | 9841440.26  | 16543825.11 | 25659634.39 | 41334748.76 | 0.52 | 635.51 | 1048.39 | 1589.19 | 2563.24 |
| 0.12 | 6224205.53  | 10410031.15 | 16138469.25 | 25710214.82 | 0.53 | 542.71 | 897.97  | 1344.59 | 2133.31 |
| 0.13 | 3986299.69  | 6778884.44  | 10436001.37 | 16963583.79 | 0.54 | 469.84 | 761.96  | 1133.56 | 1809.68 |
| 0.14 | 2662342.40  | 4515870.26  | 6917425.45  | 11228860.72 | 0.55 | 397.14 | 649.79  | 973.86  | 1539.34 |
| 0.15 | 1819721.70  | 3053184.96  | 4780838.26  | 7620937.16  | 0.56 | 338.95 | 556.17  | 825.96  | 1306.13 |
| 0.16 | 1266299.20  | 2122937.02  | 3320751.99  | 5354747.47  | 0.57 | 291.84 | 472.23  | 710.59  | 1118.92 |
| 0.17 | 890434.16   | 1520664.27  | 2381257.45  | 3887454.62  | 0.58 | 251.92 | 408.90  | 615.62  | 960.91  |
| 0.18 | 648382.45   | 1098293.79  | 1688164.60  | 2777126.50  | 0.59 | 216.03 | 351.64  | 517.40  | 809.35  |
| 0.19 | 475663.11   | 800107.04   | 1242667.41  | 2002224.17  | 0.60 | 184.67 | 299.39  | 447.53  | 700.80  |
| 0.20 | 350960.38   | 593108.26   | 920885.77   | 1507551.27  | 0.61 | 158.49 | 258.12  | 378.83  | 584.91  |
| 0.21 | 266287.60   | 447977.67   | 688549.36   | 1106819.09  | 0.62 | 136.44 | 218.21  | 329.02  | 497.42  |
| 0.22 | 200854.70   | 340648.30   | 526353.04   | 859917.42   | 0.63 | 116.69 | 188.61  | 279.78  | 431.20  |
| 0.23 | 155114.24   | 262953.65   | 410671.55   | 667894.66   | 0.64 | 99.94  | 159.40  | 237.39  | 367.49  |
| 0.24 | 120708.87   | 204510.03   | 315147.48   | 513029.25   | 0.65 | 85.64  | 136.92  | 201.88  | 313.55  |
| 0.25 | 94089.86    | 159208.15   | 247103.87   | 401868.55   | 0.66 | 73.37  | 116.77  | 173.03  | 270.12  |
| 0.26 | 74497.38    | 126130.09   | 191555.14   | 311835.37   | 0.67 | 63.19  | 99.73   | 147.61  | 227.62  |
| 0.27 | 59130.68    | 99993.72    | 153511.05   | 244772.98   | 0.68 | 53.79  | 85.54   | 125.46  | 192.05  |
| 0.28 | 46911.33    | 78671.84    | 122119.26   | 200137.66   | 0.69 | 46.06  | 73.81   | 106.33  | 161.34  |
| 0.29 | 37689.61    | 63979.81    | 98166.10    | 161941.27   | 0.70 | 39.45  | 62.80   | 91.30   | 139.41  |
| 0.30 | 30654.96    | 51168.84    | 80443.48    | 131714.84   | 0.71 | 33.60  | 53.34   | 77.08   | 115.49  |
| 0.31 | 24731.56    | 41459.34    | 65105.76    | 106585.14   | 0.72 | 28.60  | 45.15   | 66.05   | 98.58   |
| 0.32 | 20267.86    | 33730.94    | 52287.43    | 86751.10    | 0.73 | 24.15  | 37.89   | 55.03   | 83.35   |
| 0.33 | 16589.05    | 27790.82    | 42767.27    | 71108.77    | 0.74 | 20.29  | 32.21   | 46.07   | 69.15   |
| 0.34 | 13763.62    | 23028.82    | 35404.96    | 58185.88    | 0.75 | 17.25  | 26.67   | 38.30   | 58.71   |
| 0.35 | 11251.78    | 18701.35    | 28964.07    | 47232.04    | 0.76 | 14.42  | 22.59   | 32.23   | 48.81   |
| 0.36 | 9419.22     | 15577.54    | 23936.12    | 39093.67    | 0.77 | 12.11  | 18.93   | 27.18   | 40.92   |
| 0.37 | 7822.24     | 13005.43    | 20039.74    | 32501.52    | 0.78 | 10.20  | 15.83   | 22.56   | 33.51   |
| 0.38 | 6503.21     | 10755.30    | 16435.05    | 27279.86    | 0.79 | 8.46   | 13.11   | 18.66   | 27.51   |
| 0.39 | 5457.23     | 9040.73     | 13670.80    | 22542.00    | 0.80 | 7.02   | 10.79   | 15.43   | 22.48   |
| 0.40 | 4559.66     | 7623.35     | 11639.41    | 18503.26    | 0.81 | 5.78   | 8.92    | 12.69   | 18.43   |
| 0.41 | 3829.27     | 6411.32     | 9741.69     | 15458.80    | 0.82 | 4.76   | 7.25    | 10.25   | 15.32   |
| 0.42 | 3255.59     | 5382.38     | 8329.56     | 13248.29    | 0.83 | 3.91   | 5.92    | 8.39    | 12.29   |
| 0.43 | 2765.55     | 4546.46     | 6959.81     | 11179.04    | 0.84 | 3.18   | 4.85    | 6.79    | 9.77    |
| 0.44 | 2323.63     | 3840.60     | 5853.34     | 9398.48     | 0.85 | 2.56   | 3.89    | 5.44    | 8.01    |
| 0.45 | 1986.24     | 3265.52     | 4946.88     | 7906.39     | 0.86 | 2.04   | 3.12    | 4.38    | 6.39    |
| 0.46 | 1666.90     | 2783.06     | 4180.07     | 6613.88     | 0.87 | 1.62   | 2.46    | 3.46    | 4.96    |
| 0.47 | 1419.26     | 2359.29     | 3552.01     | 5577.69     | 0.88 | 1.28   | 1.91    | 2.67    | 3.86    |
| 0.48 | 1203.30     | 2015.66     | 3018.86     | 4758.38     | 0.89 | 0.98   | 1.47    | 2.07    | 2.97    |
| 0.49 | 1021.41     | 1700.73     | 2577.50     | 4034.16     | 0.90 | 0.75   | 1.12    | 1.56    | 2.25    |
| 0.50 | 872.20      | 1451.96     | 2206.88     | 3458.87     |      |        |         |         |         |

Table S128: Critical values for detector  $\hat{H}_{sn}^m$  and FM-OLS and D-OLS estimation in a model with intercept and linear trend. The number of integrated regressors is 2 and the highest power of  $x_{kt}$  is 1.

| m    | 90 %        | 95 %        | 97,5 %       | 99 %         | m    | 90 %    | 95 %    | 97,5 %  | 99 %    |
|------|-------------|-------------|--------------|--------------|------|---------|---------|---------|---------|
| 0.10 | 53396828.69 | 91073709.74 | 142953067.46 | 236819147.14 | 0.51 | 2353.40 | 3882.70 | 5972.41 | 9284.72 |
| 0.11 | 31904681.58 | 54233998.36 | 84861187.75  | 140659733.75 | 0.52 | 2011.53 | 3320.39 | 5067.48 | 7897.75 |
| 0.12 | 19638262.49 | 33656993.65 | 52145685.38  | 85788041.87  | 0.53 | 1728.30 | 2845.07 | 4292.17 | 6748.69 |
| 0.13 | 12652739.03 | 21495176.87 | 33465478.97  | 53674951.61  | 0.54 | 1472.97 | 2426.49 | 3639.14 | 5739.41 |
| 0.14 | 8407157.12  | 14348316.62 | 22148151.31  | 35853534.19  | 0.55 | 1260.34 | 2065.40 | 3086.11 | 4937.17 |
| 0.15 | 5740213.02  | 9798489.71  | 15047430.65  | 24212349.19  | 0.56 | 1078.88 | 1768.69 | 2653.77 | 4249.79 |
| 0.16 | 3996541.75  | 6828931.81  | 10565625.75  | 16795885.99  | 0.57 | 924.81  | 1519.07 | 2303.76 | 3640.40 |
| 0.17 | 2819089.23  | 4866391.92  | 7557436.69   | 12171922.00  | 0.58 | 790.49  | 1305.05 | 1973.60 | 3102.77 |
| 0.18 | 2046421.59  | 3493280.32  | 5507505.20   | 8876603.92   | 0.59 | 675.99  | 1122.01 | 1684.96 | 2622.36 |
| 0.19 | 1488607.07  | 2565172.49  | 4006528.51   | 6584471.09   | 0.60 | 582.97  | 957.33  | 1429.76 | 2245.56 |
| 0.20 | 1115961.54  | 1907553.99  | 2983136.91   | 4940864.68   | 0.61 | 502.33  | 816.71  | 1207.78 | 1901.57 |
| 0.21 | 844097.97   | 1426860.89  | 2245727.71   | 3670424.66   | 0.62 | 428.20  | 695.15  | 1036.65 | 1600.09 |
| 0.22 | 639195.62   | 1095958.49  | 1707215.17   | 2842733.32   | 0.63 | 366.92  | 593.68  | 879.92  | 1377.64 |
| 0.23 | 497470.07   | 846793.42   | 1305567.70   | 2139031.53   | 0.64 | 316.80  | 506.17  | 750.20  | 1170.43 |
| 0.24 | 383745.19   | 658239.78   | 1015198.02   | 1668521.57   | 0.65 | 271.39  | 433.54  | 644.01  | 1000.46 |
| 0.25 | 299703.97   | 513259.24   | 795826.03    | 1290484.94   | 0.66 | 233.09  | 372.90  | 553.91  | 851.49  |
| 0.26 | 236933.87   | 405994.04   | 617317.29    | 1021363.87   | 0.67 | 200.93  | 319.71  | 472.11  | 731.17  |
| 0.27 | 187283.88   | 318814.57   | 489568.39    | 795263.86    | 0.68 | 171.46  | 272.93  | 405.33  | 617.13  |
| 0.28 | 149292.76   | 255377.86   | 393986.25    | 634546.31    | 0.69 | 145.97  | 232.95  | 342.76  | 521.37  |
| 0.29 | 120300.54   | 204812.51   | 313734.11    | 509670.94    | 0.70 | 125.12  | 198.38  | 292.56  | 439.51  |
| 0.30 | 97340.39    | 165456.41   | 256285.59    | 415298.67    | 0.71 | 106.82  | 169.03  | 246.41  | 370.37  |
| 0.31 | 78586.19    | 133895.65   | 207176.81    | 334047.64    | 0.72 | 90.59   | 142.68  | 206.13  | 316.61  |
| 0.32 | 64052.82    | 108777.17   | 169645.92    | 273559.04    | 0.73 | 77.33   | 120.37  | 174.31  | 267.54  |
| 0.33 | 52317.76    | 88837.73    | 139986.16    | 226712.57    | 0.74 | 65.24   | 101.07  | 147.24  | 225.51  |
| 0.34 | 43007.59    | 73249.75    | 114826.27    | 188526.31    | 0.75 | 55.14   | 85.01   | 124.13  | 189.07  |
| 0.35 | 35833.74    | 60638.16    | 94242.28     | 156720.28    | 0.76 | 46.72   | 71.87   | 103.31  | 155.46  |
| 0.36 | 29556.90    | 50043.79    | 78025.37     | 128412.55    | 0.77 | 39.34   | 60.35   | 85.72   | 128.09  |
| 0.37 | 24656.07    | 41654.81    | 65288.50     | 104470.86    | 0.78 | 32.96   | 50.83   | 71.35   | 104.80  |
| 0.38 | 20504.43    | 34763.66    | 53414.05     | 87744.70     | 0.79 | 27.61   | 42.13   | 59.42   | 85.70   |
| 0.39 | 17153.64    | 28867.50    | 44671.47     | 74616.65     | 0.80 | 23.14   | 34.92   | 49.32   | 71.68   |
| 0.40 | 14301.02    | 24029.24    | 37674.62     | 61254.38     | 0.81 | 19.30   | 29.01   | 40.62   | 58.45   |
| 0.41 | 12020.15    | 20257.75    | 31353.51     | 51074.24     | 0.82 | 16.01   | 23.96   | 33.30   | 48.02   |
| 0.42 | 10110.59    | 17133.51    | 26505.02     | 42536.78     | 0.83 | 13.23   | 19.71   | 27.19   | 39.79   |
| 0.43 | 8562.48     | 14482.13    | 22156.37     | 35903.98     | 0.84 | 10.81   | 16.10   | 22.37   | 32.06   |
| 0.44 | 7281.07     | 12177.50    | 18557.84     | 30109.87     | 0.85 | 8.89    | 13.11   | 18.19   | 25.77   |
| 0.45 | 6194.95     | 10408.59    | 15744.45     | 25507.92     | 0.86 | 7.23    | 10.60   | 14.63   | 20.58   |
| 0.46 | 5261.55     | 8842.25     | 13401.31     | 21627.41     | 0.87 | 5.84    | 8.56    | 11.71   | 16.29   |
| 0.47 | 4485.79     | 7502.33     | 11287.44     | 18018.11     | 0.88 | 4.69    | 6.83    | 9.24    | 12.77   |
| 0.48 | 3813.76     | 6357.40     | 9645.25      | 14982.06     | 0.89 | 3.72    | 5.40    | 7.21    | 9.97    |
| 0.49 | 3253.83     | 5422.81     | 8180.95      | 12871.26     | 0.90 | 2.92    | 4.20    | 5.62    | 7.67    |
| 0.50 | 2763.20     | 4586.58     | 6954.13      | 10986.92     |      |         |         |         |         |

Table S129: Critical values for detector  $\hat{H}_{sn}^m$  and IM-OLS estimation in a model with intercept and linear trend. The number of integrated regressors is 2 and the highest power of  $x_{kt}$  is 1.

| m    | 90 %        | 95 %        | 97,5 %       | 99 %         | m    | 90 %   | 95 %    | 97,5 %  | 99 %    |
|------|-------------|-------------|--------------|--------------|------|--------|---------|---------|---------|
| 0.10 | 22525385.49 | 58799025.11 | 132597383.36 | 324466226.07 | 0.51 | 715.59 | 1614.22 | 3277.43 | 7240.50 |
| 0.11 | 13259384.80 | 35011108.43 | 80396459.41  | 196306800.41 | 0.52 | 612.39 | 1357.66 | 2728.21 | 5974.73 |
| 0.12 | 8296831.60  | 22041662.51 | 48732710.93  | 119009663.47 | 0.53 | 514.33 | 1145.44 | 2257.47 | 5054.66 |
| 0.13 | 5314616.24  | 13841987.43 | 30204131.20  | 76026592.52  | 0.54 | 436.15 | 964.61  | 1927.41 | 4263.90 |
| 0.14 | 3642906.31  | 9154756.60  | 20369798.36  | 51578134.14  | 0.55 | 367.71 | 803.45  | 1584.73 | 3508.22 |
| 0.15 | 2452321.24  | 6200594.82  | 13689751.11  | 33926290.58  | 0.56 | 307.05 | 671.97  | 1337.41 | 2981.52 |
| 0.16 | 1656351.49  | 4231432.56  | 9487420.83   | 24351239.48  | 0.57 | 262.08 | 575.98  | 1126.01 | 2497.46 |
| 0.17 | 1158075.29  | 3032579.03  | 6774490.73   | 17034277.56  | 0.58 | 223.89 | 483.64  | 953.46  | 2034.89 |
| 0.18 | 825629.80   | 2128269.88  | 4803264.56   | 12072431.85  | 0.59 | 190.92 | 404.16  | 796.03  | 1755.73 |
| 0.19 | 598961.39   | 1540367.30  | 3403236.87   | 8405048.18   | 0.60 | 163.05 | 345.17  | 672.21  | 1451.55 |
| 0.20 | 443522.96   | 1127851.23  | 2483235.84   | 6353918.92   | 0.61 | 138.72 | 291.51  | 569.69  | 1224.16 |
| 0.21 | 331218.16   | 853510.37   | 1859323.13   | 4645055.65   | 0.62 | 118.26 | 247.40  | 475.61  | 1007.00 |
| 0.22 | 249536.98   | 636889.60   | 1390683.40   | 3417285.59   | 0.63 | 100.99 | 211.49  | 410.51  | 865.84  |
| 0.23 | 190825.88   | 485790.02   | 1054808.24   | 2551465.63   | 0.64 | 85.30  | 177.91  | 336.35  | 726.49  |
| 0.24 | 147634.91   | 370958.26   | 801713.40    | 1947843.23   | 0.65 | 72.82  | 151.34  | 282.78  | 596.70  |
| 0.25 | 114380.38   | 287599.84   | 618862.57    | 1498451.98   | 0.66 | 61.49  | 125.65  | 233.26  | 492.32  |
| 0.26 | 88999.11    | 226118.92   | 487676.43    | 1197858.67   | 0.67 | 52.13  | 104.94  | 195.41  | 415.60  |
| 0.27 | 69598.71    | 177166.46   | 387388.11    | 953171.74    | 0.68 | 44.74  | 88.73   | 166.36  | 333.67  |
| 0.28 | 55105.86    | 139297.15   | 308146.51    | 739437.31    | 0.69 | 37.47  | 74.34   | 140.12  | 288.80  |
| 0.29 | 44102.75    | 112932.62   | 242847.45    | 585528.93    | 0.70 | 31.95  | 62.59   | 114.63  | 237.40  |
| 0.30 | 35401.59    | 89239.30    | 194267.29    | 474418.50    | 0.71 | 27.02  | 52.85   | 94.49   | 197.01  |
| 0.31 | 28896.80    | 71485.85    | 156114.81    | 370844.05    | 0.72 | 22.62  | 43.97   | 78.82   | 158.14  |
| 0.32 | 23515.46    | 57733.57    | 122311.52    | 296884.87    | 0.73 | 19.08  | 36.42   | 64.64   | 133.14  |
| 0.33 | 18807.12    | 46286.08    | 97615.88     | 232303.50    | 0.74 | 16.01  | 30.38   | 53.26   | 106.73  |
| 0.34 | 15256.55    | 37204.52    | 79194.76     | 187243.78    | 0.75 | 13.48  | 24.94   | 42.94   | 86.32   |
| 0.35 | 12462.44    | 30167.01    | 65121.89     | 150557.41    | 0.76 | 11.26  | 20.74   | 35.65   | 68.65   |
| 0.36 | 10215.09    | 24881.92    | 52706.87     | 124491.46    | 0.77 | 9.38   | 16.96   | 29.13   | 56.35   |
| 0.37 | 8505.17     | 20602.12    | 43367.37     | 102097.98    | 0.78 | 7.84   | 14.08   | 23.49   | 44.63   |
| 0.38 | 6994.58     | 16838.82    | 35949.66     | 84199.77     | 0.79 | 6.47   | 11.53   | 19.39   | 35.48   |
| 0.39 | 5849.60     | 13815.73    | 29370.94     | 68891.23     | 0.80 | 5.38   | 9.39    | 15.46   | 28.50   |
| 0.40 | 4869.09     | 11444.03    | 24534.20     | 57278.06     | 0.81 | 4.41   | 7.63    | 12.34   | 22.75   |
| 0.41 | 4015.55     | 9549.21     | 20709.44     | 48276.63     | 0.82 | 3.61   | 6.23    | 10.17   | 17.87   |
| 0.42 | 3365.31     | 7890.62     | 16676.09     | 38398.78     | 0.83 | 2.98   | 5.09    | 8.12    | 14.08   |
| 0.43 | 2819.85     | 6589.35     | 13726.54     | 31875.80     | 0.84 | 2.43   | 4.09    | 6.49    | 10.88   |
| 0.44 | 2377.56     | 5611.36     | 11336.35     | 26519.25     | 0.85 | 1.93   | 3.27    | 5.05    | 8.54    |
| 0.45 | 2002.51     | 4595.30     | 9527.05      | 21654.63     | 0.86 | 1.54   | 2.55    | 4.00    | 6.58    |
| 0.46 | 1662.54     | 3830.49     | 7859.83      | 17920.41     | 0.87 | 1.23   | 2.00    | 3.07    | 5.01    |
| 0.47 | 1406.60     | 3264.64     | 6680.99      | 15062.12     | 0.88 | 0.95   | 1.56    | 2.33    | 3.76    |
| 0.48 | 1183.07     | 2724.27     | 5605.95      | 12609.02     | 0.89 | 0.74   | 1.19    | 1.78    | 2.84    |
| 0.49 | 997.36      | 2290.29     | 4683.08      | 10524.20     | 0.90 | 0.55   | 0.89    | 1.31    | 2.09    |
| 0.50 | 845.59      | 1892.24     | 3915.95      | 8557.62      |      |        |         |         |         |

Table S130: Critical values for detector  $\hat{H}_{sn}^m$  and FM-OLS and D-OLS estimation in a model with intercept. The number of integrated regressors is 2 and the highest power of  $x_{kt}$  is 2.

| m    | 90 %         | 95 %         | 97,5 %       | 99 %          | m    | 90 %    | 95 %     | 97,5 %   | 99 %     |
|------|--------------|--------------|--------------|---------------|------|---------|----------|----------|----------|
| 0.10 | 146881870.92 | 398869221.25 | 909541202.45 | 2424546826.84 | 0.51 | 4125.40 | 10205.37 | 21719.71 | 51618.17 |
| 0.11 | 86476024.13  | 235881244.86 | 544834824.62 | 1377318835.66 | 0.52 | 3488.51 | 8506.96  | 18476.25 | 43261.11 |
| 0.12 | 53693488.35  | 144787834.87 | 333572521.34 | 849452847.31  | 0.53 | 2922.11 | 7110.56  | 15424.04 | 36000.43 |
| 0.13 | 34226142.07  | 92404785.42  | 214596526.97 | 535463555.54  | 0.54 | 2459.61 | 5967.95  | 12949.04 | 30000.58 |
| 0.14 | 22438398.52  | 59840735.31  | 139348749.84 | 339364293.71  | 0.55 | 2071.08 | 5020.13  | 10687.16 | 24433.03 |
| 0.15 | 15283030.45  | 40725261.29  | 92239214.33  | 228982496.78  | 0.56 | 1766.70 | 4172.70  | 8935.39  | 20503.74 |
| 0.16 | 10670266.98  | 28353484.50  | 64704895.92  | 159654763.89  | 0.57 | 1510.27 | 3513.62  | 7426.47  | 17476.03 |
| 0.17 | 7382095.19   | 19893156.14  | 44895047.38  | 115259611.01  | 0.58 | 1276.01 | 2940.90  | 6207.12  | 14450.74 |
| 0.18 | 5259058.55   | 14170440.92  | 32063013.51  | 83124217.13   | 0.59 | 1083.10 | 2456.84  | 5244.89  | 12386.96 |
| 0.19 | 3814601.34   | 10147878.16  | 22957464.59  | 59757189.59   | 0.60 | 907.04  | 2079.94  | 4396.68  | 10239.24 |
| 0.20 | 2829138.80   | 7589245.23   | 17202771.51  | 43356722.15   | 0.61 | 762.75  | 1758.64  | 3651.82  | 8484.42  |
| 0.21 | 2097156.81   | 5714943.72   | 12841792.76  | 32380240.87   | 0.62 | 646.72  | 1492.58  | 3026.67  | 7137.69  |
| 0.22 | 1576965.55   | 4285811.37   | 9742353.38   | 23745930.58   | 0.63 | 550.97  | 1258.62  | 2528.59  | 5844.95  |
| 0.23 | 1202491.90   | 3200969.81   | 7347283.85   | 18319930.23   | 0.64 | 463.32  | 1047.71  | 2101.23  | 4864.41  |
| 0.24 | 931606.71    | 2443758.13   | 5556383.41   | 13871405.36   | 0.65 | 393.37  | 867.38   | 1733.62  | 3911.15  |
| 0.25 | 720021.34    | 1894805.54   | 4231129.83   | 10672460.99   | 0.66 | 332.11  | 727.36   | 1448.55  | 3263.14  |
| 0.26 | 550460.02    | 1480630.60   | 3348092.98   | 8346446.71    | 0.67 | 278.71  | 606.98   | 1190.20  | 2699.57  |
| 0.27 | 432246.07    | 1166064.52   | 2664244.82   | 6487239.18    | 0.68 | 235.85  | 509.78   | 994.13   | 2214.75  |
| 0.28 | 343344.14    | 927378.53    | 2109374.54   | 5135476.79    | 0.69 | 198.66  | 423.70   | 829.77   | 1792.72  |
| 0.29 | 275463.45    | 732621.91    | 1667890.84   | 4027631.10    | 0.70 | 168.38  | 353.62   | 687.62   | 1461.55  |
| 0.30 | 221441.34    | 577931.83    | 1327511.21   | 3262159.01    | 0.71 | 142.41  | 294.96   | 568.04   | 1208.29  |
| 0.31 | 176855.49    | 458972.38    | 1072617.88   | 2592803.12    | 0.72 | 119.57  | 244.93   | 466.57   | 993.90   |
| 0.32 | 142710.04    | 370612.67    | 838297.75    | 2123033.14    | 0.73 | 99.75   | 203.63   | 383.40   | 807.84   |
| 0.33 | 113368.62    | 302303.15    | 661106.33    | 1703940.63    | 0.74 | 83.31   | 168.56   | 316.07   | 664.72   |
| 0.34 | 93039.07     | 242613.11    | 534592.16    | 1333762.65    | 0.75 | 69.70   | 140.92   | 260.62   | 540.75   |
| 0.35 | 75494.31     | 198647.49    | 434122.00    | 1074091.42    | 0.76 | 58.62   | 115.88   | 214.11   | 446.60   |
| 0.36 | 61702.75     | 163154.48    | 360475.53    | 885518.17     | 0.77 | 48.99   | 94.87    | 175.47   | 363.85   |
| 0.37 | 51056.86     | 133569.07    | 293461.12    | 731317.38     | 0.78 | 40.40   | 77.18    | 143.50   | 295.09   |
| 0.38 | 41856.74     | 108538.76    | 242688.18    | 595011.09     | 0.79 | 33.40   | 63.67    | 116.15   | 235.32   |
| 0.39 | 34362.96     | 89305.07     | 203632.14    | 499810.30     | 0.80 | 27.49   | 51.83    | 92.97    | 182.36   |
| 0.40 | 28757.74     | 74959.00     | 170014.89    | 406357.10     | 0.81 | 22.79   | 41.95    | 73.32    | 142.53   |
| 0.41 | 24126.75     | 62019.51     | 141070.82    | 339777.88     | 0.82 | 18.69   | 33.57    | 57.85    | 112.04   |
| 0.42 | 20088.13     | 51493.24     | 116763.88    | 274298.60     | 0.83 | 15.32   | 26.80    | 45.63    | 87.94    |
| 0.43 | 16674.03     | 42447.48     | 95484.79     | 229065.51     | 0.84 | 12.48   | 21.58    | 35.86    | 68.06    |
| 0.44 | 13874.84     | 35006.96     | 78258.32     | 192945.03     | 0.85 | 10.06   | 17.13    | 28.03    | 52.06    |
| 0.45 | 11667.65     | 28944.69     | 64752.41     | 161526.86     | 0.86 | 8.10    | 13.61    | 21.91    | 39.62    |
| 0.46 | 9751.19      | 24048.20     | 53810.80     | 130842.08     | 0.87 | 6.48    | 10.73    | 17.07    | 30.33    |
| 0.47 | 8150.01      | 20097.34     | 43878.08     | 107905.63     | 0.88 | 5.13    | 8.39     | 13.17    | 22.27    |
| 0.48 | 6864.62      | 17114.08     | 36742.39     | 87900.83      | 0.89 | 4.01    | 6.46     | 9.95     | 16.77    |
| 0.49 | 5785.81      | 14398.23     | 30539.43     | 73843.57      | 0.90 | 3.10    | 4.89     | 7.33     | 12.31    |
| 0.50 | 4871.17      | 12168.46     | 25324.10     | 62032.38      |      |         |          |          |          |

Table S131: Critical values for detector  $\hat{H}_{sn}^m$  and IM-OLS estimation in a model with intercept. The number of integrated regressors is 2 and the highest power of  $x_{kt}$  is 2.

| m    | 90 %        | 95 %         | 97,5 %       | 99 %         | m    | 90 %    | 95 %    | 97,5 %  | 99 %     |
|------|-------------|--------------|--------------|--------------|------|---------|---------|---------|----------|
| 0.10 | 75655718.62 | 158757664.53 | 313173491.32 | 705337360.21 | 0.51 | 1896.52 | 3569.94 | 6452.14 | 13027.38 |
| 0.11 | 43849842.17 | 92103872.96  | 182249415.04 | 411297150.17 | 0.52 | 1587.76 | 3017.72 | 5285.95 | 10780.26 |
| 0.12 | 26851515.59 | 55318351.35  | 110058359.30 | 247347704.67 | 0.53 | 1326.90 | 2493.35 | 4394.48 | 9100.05  |
| 0.13 | 16804443.07 | 34613326.65  | 67089062.76  | 150396337.95 | 0.54 | 1124.62 | 2110.02 | 3640.05 | 7528.65  |
| 0.14 | 11075845.48 | 22670435.67  | 44871385.08  | 100997261.61 | 0.55 | 950.30  | 1753.89 | 3093.70 | 6359.29  |
| 0.15 | 7489423.68  | 15075985.27  | 29390855.92  | 66135349.53  | 0.56 | 796.29  | 1495.62 | 2588.14 | 5252.52  |
| 0.16 | 5098325.32  | 10373538.56  | 19912360.58  | 46252599.66  | 0.57 | 678.76  | 1269.31 | 2221.10 | 4449.23  |
| 0.17 | 3555345.59  | 7318952.34   | 13967436.99  | 31823021.73  | 0.58 | 576.40  | 1069.03 | 1833.79 | 3762.42  |
| 0.18 | 2546353.63  | 5170732.97   | 9870184.31   | 22221194.01  | 0.59 | 482.24  | 894.26  | 1576.09 | 3120.51  |
| 0.19 | 1819539.50  | 3683675.05   | 7110362.38   | 15825031.07  | 0.60 | 411.12  | 761.24  | 1321.42 | 2582.09  |
| 0.20 | 1344123.05  | 2685399.61   | 5257866.78   | 11641532.58  | 0.61 | 351.31  | 642.25  | 1123.04 | 2180.18  |
| 0.21 | 980249.42   | 2002002.01   | 3802389.34   | 8531806.76   | 0.62 | 295.76  | 538.84  | 928.84  | 1848.36  |
| 0.22 | 745278.71   | 1508133.00   | 2867405.62   | 6211563.89   | 0.63 | 251.07  | 461.77  | 806.65  | 1555.31  |
| 0.23 | 563587.49   | 1139121.23   | 2174906.70   | 4713995.98   | 0.64 | 213.62  | 387.34  | 660.81  | 1293.43  |
| 0.24 | 430676.96   | 871836.53    | 1656564.43   | 3554981.08   | 0.65 | 179.03  | 323.57  | 550.21  | 1041.68  |
| 0.25 | 333018.88   | 669562.75    | 1272152.56   | 2694705.12   | 0.66 | 151.36  | 270.17  | 456.25  | 872.50   |
| 0.26 | 256334.95   | 517288.41    | 1002916.39   | 2187915.85   | 0.67 | 127.35  | 227.87  | 383.21  | 717.88   |
| 0.27 | 202556.32   | 407645.99    | 773226.91    | 1689507.43   | 0.68 | 106.91  | 190.91  | 317.48  | 597.13   |
| 0.28 | 161271.94   | 323690.68    | 609765.91    | 1340697.65   | 0.69 | 90.24   | 160.93  | 267.49  | 504.25   |
| 0.29 | 127714.39   | 254216.66    | 477829.63    | 1070391.32   | 0.70 | 75.76   | 133.63  | 220.59  | 413.10   |
| 0.30 | 101479.07   | 203814.48    | 387965.25    | 809675.29    | 0.71 | 63.87   | 111.50  | 185.35  | 343.61   |
| 0.31 | 82281.89    | 162216.41    | 306444.71    | 664164.04    | 0.72 | 53.47   | 93.19   | 151.89  | 280.29   |
| 0.32 | 65252.48    | 131076.80    | 244300.28    | 512357.63    | 0.73 | 44.37   | 76.21   | 128.18  | 236.40   |
| 0.33 | 52530.05    | 103924.32    | 189996.53    | 404134.34    | 0.74 | 36.80   | 63.46   | 103.44  | 188.76   |
| 0.34 | 43313.32    | 84834.75     | 152717.10    | 327877.54    | 0.75 | 30.34   | 52.13   | 85.03   | 154.09   |
| 0.35 | 34949.21    | 68862.03     | 125296.05    | 258190.67    | 0.76 | 25.48   | 42.84   | 68.84   | 124.80   |
| 0.36 | 28358.79    | 56731.42     | 102659.11    | 215450.14    | 0.77 | 20.81   | 35.50   | 57.01   | 102.46   |
| 0.37 | 23511.56    | 46496.92     | 85801.49     | 176888.91    | 0.78 | 17.25   | 28.88   | 46.00   | 79.98    |
| 0.38 | 19149.37    | 38072.74     | 70660.88     | 149772.08    | 0.79 | 14.12   | 23.73   | 37.42   | 63.15    |
| 0.39 | 15676.71    | 31499.96     | 57839.94     | 120590.06    | 0.80 | 11.41   | 19.09   | 29.69   | 50.55    |
| 0.40 | 13099.11    | 26013.48     | 48509.32     | 99887.96     | 0.81 | 9.30    | 15.26   | 23.75   | 40.17    |
| 0.41 | 10861.17    | 21406.58     | 39832.78     | 84305.85     | 0.82 | 7.55    | 12.30   | 18.96   | 31.31    |
| 0.42 | 9107.44     | 17721.76     | 33042.12     | 69485.27     | 0.83 | 6.07    | 9.97    | 14.93   | 24.35    |
| 0.43 | 7623.08     | 14774.92     | 27224.90     | 57769.67     | 0.84 | 4.86    | 7.83    | 11.62   | 19.15    |
| 0.44 | 6396.91     | 12379.87     | 22692.67     | 47075.25     | 0.85 | 3.84    | 6.09    | 9.16    | 14.56    |
| 0.45 | 5313.78     | 10248.87     | 18562.13     | 39059.34     | 0.86 | 3.03    | 4.83    | 7.15    | 11.02    |
| 0.46 | 4446.01     | 8576.16      | 15155.14     | 32406.92     | 0.87 | 2.34    | 3.71    | 5.49    | 8.51     |
| 0.47 | 3745.72     | 7230.65      | 13149.15     | 27369.32     | 0.88 | 1.82    | 2.83    | 4.13    | 6.25     |
| 0.48 | 3170.15     | 6000.75      | 10959.43     | 22484.06     | 0.89 | 1.37    | 2.13    | 3.08    | 4.68     |
| 0.49 | 2644.61     | 5042.17      | 9125.42      | 18496.41     | 0.90 | 1.02    | 1.57    | 2.25    | 3.45     |
| 0.50 | 2243.36     | 4259.46      | 7602.60      | 15091.00     |      |         |         |         |          |

Table S132: Critical values for detector  $\hat{H}_{sn}^m$  and FM-OLS and D-OLS estimation in a model with intercept and linear trend. The number of integrated regressors is 2 and the highest power of  $x_{kt}$  is 2.

| m    | 90 %         | 95 %         | 97,5 %        | 99 %          | m    | 90 %    | 95 %     | 97,5 %   | 99 %     |
|------|--------------|--------------|---------------|---------------|------|---------|----------|----------|----------|
| 0.10 | 319188323.81 | 718127378.70 | 1467145535.60 | 3421588750.67 | 0.51 | 7242.53 | 14537.30 | 27664.89 | 60519.06 |
| 0.11 | 183250139.01 | 408248716.34 | 837391543.95  | 2039685611.08 | 0.52 | 6065.88 | 12274.41 | 23310.88 | 50398.97 |
| 0.12 | 109899086.25 | 242768902.68 | 517192751.49  | 1189442818.73 | 0.53 | 5119.89 | 10309.99 | 19550.98 | 43170.44 |
| 0.13 | 69628554.42  | 152995921.18 | 315854432.80  | 727516953.96  | 0.54 | 4314.93 | 8524.08  | 16207.35 | 35472.52 |
| 0.14 | 44821456.80  | 98477035.26  | 203296773.34  | 471911844.45  | 0.55 | 3641.85 | 7098.35  | 13597.50 | 29105.33 |
| 0.15 | 30231176.87  | 65848324.56  | 136914052.03  | 322077190.48  | 0.56 | 3062.59 | 5961.09  | 11291.94 | 24255.10 |
| 0.16 | 20595215.82  | 45473684.62  | 93789087.25   | 222553115.01  | 0.57 | 2581.83 | 5023.70  | 9499.84  | 20891.32 |
| 0.17 | 14268141.63  | 31256056.76  | 65131769.21   | 157091998.17  | 0.58 | 2182.29 | 4278.95  | 7984.38  | 17383.08 |
| 0.18 | 10202199.71  | 21993974.64  | 45410301.50   | 108427306.99  | 0.59 | 1858.62 | 3601.52  | 6604.05  | 14619.57 |
| 0.19 | 7358910.04   | 15964271.22  | 32317211.82   | 76586450.57   | 0.60 | 1576.55 | 3056.27  | 5619.14  | 12098.14 |
| 0.20 | 5442731.95   | 11669915.63  | 23742135.99   | 56510299.49   | 0.61 | 1332.90 | 2575.48  | 4712.84  | 10198.70 |
| 0.21 | 4018937.09   | 8722705.37   | 17620685.25   | 41505978.37   | 0.62 | 1120.62 | 2150.90  | 3972.83  | 8614.64  |
| 0.22 | 2992426.59   | 6584864.59   | 13437128.08   | 30605552.17   | 0.63 | 946.47  | 1795.96  | 3341.15  | 7076.07  |
| 0.23 | 2243499.36   | 4900614.01   | 10023966.45   | 23439173.11   | 0.64 | 797.95  | 1516.50  | 2762.46  | 5955.22  |
| 0.24 | 1703311.50   | 3689206.06   | 7563529.84    | 17320259.38   | 0.65 | 672.02  | 1274.42  | 2327.83  | 4911.84  |
| 0.25 | 1326901.64   | 2858709.23   | 5741207.20    | 13378070.98   | 0.66 | 567.24  | 1074.08  | 1927.43  | 4142.19  |
| 0.26 | 1038249.36   | 2206166.84   | 4476923.49    | 10543572.55   | 0.67 | 478.23  | 889.86   | 1595.58  | 3361.51  |
| 0.27 | 807823.28    | 1732150.21   | 3517519.79    | 8207090.71    | 0.68 | 402.24  | 735.81   | 1307.98  | 2759.83  |
| 0.28 | 634705.43    | 1361585.42   | 2741459.42    | 6349511.39    | 0.69 | 337.34  | 614.20   | 1088.47  | 2247.86  |
| 0.29 | 493679.87    | 1077866.70   | 2140021.72    | 4803325.26    | 0.70 | 283.45  | 515.87   | 900.14   | 1825.68  |
| 0.30 | 396950.54    | 855130.80    | 1680792.56    | 3859214.76    | 0.71 | 236.97  | 428.30   | 741.46   | 1499.62  |
| 0.31 | 317768.75    | 675508.62    | 1355666.13    | 3029739.04    | 0.72 | 198.55  | 358.49   | 614.33   | 1250.91  |
| 0.32 | 254224.79    | 536612.73    | 1070101.40    | 2444782.68    | 0.73 | 165.63  | 296.07   | 518.12   | 1024.21  |
| 0.33 | 205619.60    | 433789.42    | 872445.21     | 2034662.51    | 0.74 | 137.98  | 248.59   | 428.24   | 832.96   |
| 0.34 | 166695.43    | 355266.87    | 705503.02     | 1646422.05    | 0.75 | 115.35  | 203.31   | 349.98   | 682.70   |
| 0.35 | 136193.33    | 287839.85    | 572763.37     | 1350415.89    | 0.76 | 95.54   | 168.05   | 285.41   | 563.66   |
| 0.36 | 111307.64    | 237801.80    | 475622.61     | 1078115.72    | 0.77 | 78.55   | 137.91   | 230.30   | 454.74   |
| 0.37 | 91179.12     | 192468.75    | 387721.98     | 878728.90     | 0.78 | 64.73   | 112.13   | 186.12   | 358.33   |
| 0.38 | 75632.38     | 158162.41    | 315881.32     | 727926.18     | 0.79 | 52.94   | 91.27    | 151.99   | 283.23   |
| 0.39 | 61878.68     | 129733.13    | 259939.87     | 613623.79     | 0.80 | 43.09   | 74.06    | 120.83   | 221.39   |
| 0.40 | 51641.91     | 106976.73    | 215018.96     | 488906.58     | 0.81 | 34.96   | 59.65    | 96.20    | 176.01   |
| 0.41 | 42950.87     | 89040.71     | 175955.77     | 404971.56     | 0.82 | 28.47   | 47.74    | 75.96    | 135.96   |
| 0.42 | 35564.74     | 73116.88     | 144451.47     | 328949.74     | 0.83 | 23.03   | 38.20    | 60.43    | 106.62   |
| 0.43 | 29339.31     | 60418.59     | 119437.83     | 275360.49     | 0.84 | 18.57   | 30.38    | 47.85    | 83.68    |
| 0.44 | 24497.56     | 51002.02     | 99448.65      | 228336.27     | 0.85 | 14.78   | 24.07    | 37.39    | 63.79    |
| 0.45 | 20507.45     | 42652.01     | 80307.86      | 186146.62     | 0.86 | 11.73   | 18.90    | 28.90    | 48.72    |
| 0.46 | 17213.85     | 35129.79     | 66508.60      | 155583.18     | 0.87 | 9.25    | 14.64    | 22.21    | 37.04    |
| 0.47 | 14383.04     | 29162.72     | 55730.83      | 127107.28     | 0.88 | 7.21    | 11.35    | 17.00    | 27.90    |
| 0.48 | 12200.54     | 24596.20     | 47603.85      | 104089.66     | 0.89 | 5.60    | 8.67     | 12.78    | 20.53    |
| 0.49 | 10171.56     | 20756.93     | 39824.43      | 86344.28      | 0.90 | 4.27    | 6.55     | 9.52     | 14.90    |
| 0.50 | 8574.95      | 17312.79     | 33236.17      | 71615.80      |      |         |          |          |          |

Table S133: Critical values for detector  $\hat{H}_{sn}^m$  and IM-OLS estimation in a model with intercept and linear trend. The number of integrated regressors is 2 and the highest power of  $x_{kt}$  is 2.

| m    | 90 %          | 95 %          | 97,5 %         | 99 %           | m    | 90 %    | 95 %     | 97,5 %   | 99 %      |
|------|---------------|---------------|----------------|----------------|------|---------|----------|----------|-----------|
| 0.10 | 2355289723.83 | 8545800355.77 | 24837447833.11 | 85079415568.07 | 0.51 | 7048.90 | 24213.45 | 69033.29 | 201901.86 |
| 0.11 | 1252554649.66 | 4454831393.19 | 13050272412.50 | 44211633681.23 | 0.52 | 5731.26 | 19888.79 | 54211.84 | 164152.52 |
| 0.12 | 717189300.91  | 2586346017.50 | 7384495713.74  | 24799481482.72 | 0.53 | 4551.17 | 15773.02 | 42994.72 | 134377.59 |
| 0.13 | 419969109.10  | 1516140223.33 | 4425194131.08  | 14310614693.97 | 0.54 | 3696.36 | 12801.73 | 34805.73 | 106802.96 |
| 0.14 | 250782380.01  | 920593528.25  | 2789600618.45  | 8827060952.79  | 0.55 | 2971.08 | 10256.18 | 27329.09 | 86854.83  |
| 0.15 | 157615387.79  | 583178509.79  | 1749937138.79  | 5649046068.02  | 0.56 | 2421.05 | 8408.61  | 22917.18 | 69715.01  |
| 0.16 | 97243617.48   | 366347747.38  | 1076858457.79  | 3736619293.15  | 0.57 | 1946.72 | 6677.01  | 18097.81 | 53235.72  |
| 0.17 | 64217305.28   | 236165457.50  | 687898106.69   | 2371920153.32  | 0.58 | 1550.21 | 5323.20  | 14552.33 | 43761.17  |
| 0.18 | 42308185.46   | 156111572.05  | 467862230.68   | 1562305400.69  | 0.59 | 1258.84 | 4309.09  | 11732.90 | 34814.35  |
| 0.19 | 28877599.74   | 107057627.70  | 315701239.28   | 1067629292.98  | 0.60 | 1011.13 | 3455.61  | 9740.83  | 29003.75  |
| 0.20 | 20044500.90   | 73960759.90   | 218269305.50   | 695271903.59   | 0.61 | 834.93  | 2817.09  | 7793.69  | 23083.81  |
| 0.21 | 14265489.13   | 50913121.28   | 148294722.51   | 521672095.18   | 0.62 | 677.57  | 2239.39  | 6253.70  | 18968.02  |
| 0.22 | 9992241.21    | 36566965.42   | 104603573.02   | 364783505.26   | 0.63 | 548.08  | 1845.43  | 5071.67  | 14770.34  |
| 0.23 | 7345064.64    | 26739464.03   | 76214520.58    | 250812502.83   | 0.64 | 443.44  | 1451.70  | 3990.01  | 11887.65  |
| 0.24 | 5162520.10    | 19619518.24   | 55376144.01    | 178552134.37   | 0.65 | 359.57  | 1165.99  | 3163.97  | 9184.53   |
| 0.25 | 3828430.11    | 14055893.88   | 40279852.26    | 131965004.20   | 0.66 | 289.13  | 924.07   | 2469.98  | 7289.07   |
| 0.26 | 2785704.18    | 10290795.04   | 30166099.55    | 99130070.45    | 0.67 | 231.32  | 731.26   | 1955.97  | 5923.18   |
| 0.27 | 2153378.69    | 7810961.15    | 22504195.58    | 70780908.79    | 0.68 | 187.52  | 592.48   | 1544.82  | 4847.25   |
| 0.28 | 1624432.65    | 5946195.69    | 16754042.93    | 53692884.96    | 0.69 | 152.26  | 474.57   | 1223.72  | 3705.37   |
| 0.29 | 1198284.27    | 4408548.78    | 12589543.65    | 39803349.71    | 0.70 | 122.32  | 376.04   | 967.70   | 2798.38   |
| 0.30 | 900267.25     | 3255753.78    | 9340740.35     | 30021443.20    | 0.71 | 97.24   | 306.16   | 786.49   | 2224.67   |
| 0.31 | 707583.57     | 2520166.72    | 7267706.03     | 23793778.15    | 0.72 | 80.59   | 245.46   | 628.28   | 1793.00   |
| 0.32 | 534794.83     | 1905407.86    | 5521594.92     | 18710162.90    | 0.73 | 63.35   | 190.53   | 487.42   | 1367.72   |
| 0.33 | 421762.45     | 1502271.86    | 4406658.34     | 14493074.26    | 0.74 | 51.11   | 148.48   | 375.32   | 1027.92   |
| 0.34 | 328368.27     | 1154695.00    | 3402093.60     | 11416435.20    | 0.75 | 40.81   | 115.29   | 289.45   | 794.75    |
| 0.35 | 255849.44     | 895014.39     | 2617625.56     | 8702657.17     | 0.76 | 32.49   | 90.34    | 227.59   | 607.50    |
| 0.36 | 199942.03     | 708750.82     | 1988374.62     | 6434546.97     | 0.77 | 25.48   | 72.93    | 175.81   | 486.47    |
| 0.37 | 155653.61     | 549924.81     | 1535467.03     | 4992197.83     | 0.78 | 20.08   | 56.22    | 134.65   | 380.16    |
| 0.38 | 125483.11     | 448297.04     | 1240606.40     | 3989663.40     | 0.79 | 15.68   | 42.94    | 102.76   | 272.57    |
| 0.39 | 98662.15      | 347629.23     | 967795.38      | 3126379.85     | 0.80 | 12.34   | 32.58    | 77.37    | 196.83    |
| 0.40 | 77773.70      | 278373.16     | 765359.31      | 2490597.31     | 0.81 | 9.65    | 24.59    | 56.59    | 149.38    |
| 0.41 | 61894.31      | 222632.32     | 621814.06      | 1986676.38     | 0.82 | 7.54    | 18.92    | 43.18    | 114.41    |
| 0.42 | 48950.19      | 176041.58     | 484605.01      | 1592867.86     | 0.83 | 5.91    | 14.21    | 31.50    | 80.41     |
| 0.43 | 40006.00      | 139548.76     | 387164.70      | 1218858.12     | 0.84 | 4.55    | 10.51    | 23.33    | 57.20     |
| 0.44 | 31208.79      | 109572.53     | 310145.92      | 951767.07      | 0.85 | 3.52    | 7.77     | 16.80    | 40.75     |
| 0.45 | 25036.68      | 88575.20      | 249212.26      | 782383.52      | 0.86 | 2.66    | 5.73     | 12.01    | 28.66     |
| 0.46 | 20390.91      | 70074.38      | 197699.98      | 622596.96      | 0.87 | 2.04    | 4.19     | 8.47     | 20.28     |
| 0.47 | 16437.81      | 57193.77      | 161741.20      | 507579.31      | 0.88 | 1.53    | 3.04     | 5.88     | 13.62     |
| 0.48 | 13262.71      | 45710.47      | 128908.55      | 408913.23      | 0.89 | 1.13    | 2.13     | 4.04     | 9.26      |
| 0.49 | 10526.51      | 36039.10      | 103631.92      | 326205.29      | 0.90 | 0.83    | 1.52     | 2.76     | 5.80      |
| 0.50 | 8547.97       | 29124.31      | 83391.77       | 259965.50      |      |         |          |          |           |

Table S134: Critical values for detector  $\hat{H}_{sn}^m$  and FM-OLS and D-OLS estimation in a model with intercept. The number of integrated regressors is 2 and the highest power of  $x_{kt}$  is 3.

| m    | 90 %           | 95 %           | 97,5 %          | 99 %             | m    | 90 %     | 95 %      | 97,5 %    | 99 %       |
|------|----------------|----------------|-----------------|------------------|------|----------|-----------|-----------|------------|
| 0.10 | 25488774003.00 | 98506472357.77 | 303571499399.55 | 1098433622378.84 | 0.51 | 69410.49 | 273604.86 | 794619.93 | 2636980.28 |
| 0.11 | 13666997285.72 | 52461915536.20 | 163413860260.47 | 580526677061.09  | 0.52 | 55758.18 | 216240.43 | 637130.13 | 2089359.06 |
| 0.12 | 7656421695.95  | 29164424854.16 | 90241759353.28  | 316799961766.91  | 0.53 | 45493.34 | 173712.20 | 506945.99 | 1696400.77 |
| 0.13 | 4342944128.84  | 16710590321.97 | 51051404215.59  | 179369681094.77  | 0.54 | 36532.28 | 138813.33 | 406768.39 | 1370303.88 |
| 0.14 | 2605568979.03  | 10016974214.39 | 30645278451.62  | 114065462640.34  | 0.55 | 29750.52 | 113065.93 | 325808.04 | 1092378.01 |
| 0.15 | 1601693805.05  | 6185624020.58  | 19341658483.44  | 69505591632.21   | 0.56 | 24081.67 | 89952.33  | 267507.33 | 898559.84  |
| 0.16 | 1034696734.89  | 3957140967.43  | 12143288164.84  | 44143573392.80   | 0.57 | 19551.85 | 72737.58  | 215801.63 | 711550.52  |
| 0.17 | 677099737.94   | 2597364892.56  | 7995249899.39   | 29100446637.77   | 0.58 | 15792.15 | 59055.57  | 172996.81 | 592583.53  |
| 0.18 | 454324909.81   | 1738772505.89  | 5495414890.90   | 19261233738.80   | 0.59 | 12754.05 | 47521.19  | 140564.77 | 480981.57  |
| 0.19 | 311630560.99   | 1204618142.58  | 3702003498.57   | 13197333916.81   | 0.60 | 10286.62 | 37488.53  | 111859.94 | 373861.75  |
| 0.20 | 214684281.71   | 836292327.41   | 2542397968.23   | 9181559094.03    | 0.61 | 8183.28  | 30300.66  | 90239.59  | 293637.59  |
| 0.21 | 146740638.41   | 572297568.97   | 1749119476.78   | 6543593565.40    | 0.62 | 6595.83  | 24200.72  | 72122.23  | 226143.36  |
| 0.22 | 103710387.99   | 411293048.10   | 1275086949.14   | 4444882459.57    | 0.63 | 5320.37  | 19777.34  | 57485.17  | 180133.13  |
| 0.23 | 74232888.98    | 285122608.68   | 895711356.78    | 3083291451.22    | 0.64 | 4287.55  | 15713.59  | 45501.04  | 146004.39  |
| 0.24 | 54925228.74    | 207746060.79   | 644707442.85    | 2321246825.68    | 0.65 | 3479.43  | 12399.38  | 35701.94  | 113399.77  |
| 0.25 | 40909947.49    | 157718289.16   | 490917224.37    | 1641808126.83    | 0.66 | 2797.78  | 9751.67   | 28161.85  | 90482.15   |
| 0.26 | 29640715.19    | 116369679.02   | 360175152.49    | 1241706804.62    | 0.67 | 2238.07  | 7808.20   | 22032.66  | 71023.37   |
| 0.27 | 21863324.10    | 85593597.24    | 267231621.70    | 934437889.51     | 0.68 | 1774.95  | 6245.73   | 17440.11  | 56607.48   |
| 0.28 | 16491263.99    | 65309543.52    | 199214059.80    | 715163674.03     | 0.69 | 1403.74  | 4866.19   | 13960.49  | 44459.29   |
| 0.29 | 12251105.50    | 49197771.29    | 149213693.76    | 534787081.02     | 0.70 | 1126.26  | 3905.42   | 10866.48  | 33673.13   |
| 0.30 | 9444047.75     | 36932409.69    | 110878124.83    | 399868000.04     | 0.71 | 890.60   | 3074.15   | 8417.48   | 26978.07   |
| 0.31 | 7237688.24     | 27475378.72    | 83956312.96     | 306081430.88     | 0.72 | 721.97   | 2465.88   | 6777.45   | 20806.26   |
| 0.32 | 5624642.96     | 21330601.80    | 64742821.30     | 239556131.45     | 0.73 | 567.89   | 1943.30   | 5237.98   | 16259.39   |
| 0.33 | 4315986.17     | 16776608.62    | 51486315.23     | 181457875.51     | 0.74 | 445.69   | 1514.44   | 4085.31   | 12697.01   |
| 0.34 | 3374279.75     | 13041518.32    | 40670755.25     | 139739538.47     | 0.75 | 355.99   | 1160.11   | 3172.71   | 9611.25    |
| 0.35 | 2635693.39     | 10098417.87    | 31451586.29     | 106071585.64     | 0.76 | 276.20   | 905.86    | 2474.09   | 7108.66    |
| 0.36 | 2040954.22     | 8095557.23     | 24288335.94     | 80525379.64      | 0.77 | 213.42   | 698.50    | 1859.65   | 5439.82    |
| 0.37 | 1593618.89     | 6292311.35     | 18379849.18     | 61247963.95      | 0.78 | 168.31   | 529.88    | 1396.29   | 4180.26    |
| 0.38 | 1257338.09     | 4858954.62     | 14402501.79     | 48254183.74      | 0.79 | 129.56   | 410.68    | 1068.83   | 3283.12    |
| 0.39 | 991092.78      | 3797227.46     | 11520888.16     | 37688226.09      | 0.80 | 98.71    | 308.74    | 819.33    | 2316.69    |
| 0.40 | 788137.24      | 3038115.24     | 9164156.06      | 29857296.40      | 0.81 | 76.04    | 232.93    | 611.40    | 1779.32    |
| 0.41 | 621402.30      | 2414541.53     | 7180886.17      | 23606440.54      | 0.82 | 57.93    | 174.35    | 452.35    | 1280.29    |
| 0.42 | 490459.11      | 1931933.35     | 5715425.93      | 18832417.55      | 0.83 | 44.43    | 126.50    | 323.86    | 908.31     |
| 0.43 | 399797.54      | 1532378.56     | 4601840.89      | 15417404.56      | 0.84 | 33.58    | 92.75     | 231.58    | 660.74     |
| 0.44 | 322450.35      | 1231384.19     | 3698753.42      | 12145167.86      | 0.85 | 25.22    | 67.91     | 167.71    | 456.71     |
| 0.45 | 255557.61      | 983797.29      | 2951012.57      | 9924806.76       | 0.86 | 18.98    | 49.12     | 120.11    | 321.86     |
| 0.46 | 205829.90      | 788125.23      | 2305213.45      | 7917649.03       | 0.87 | 13.96    | 36.04     | 83.39     | 226.31     |
| 0.47 | 164683.96      | 632469.90      | 1837163.14      | 6491652.28       | 0.88 | 10.28    | 25.37     | 58.16     | 149.59     |
| 0.48 | 133118.58      | 504427.74      | 1516557.01      | 5144468.17       | 0.89 | 7.53     | 17.67     | 39.27     | 100.46     |
| 0.49 | 106496.91      | 403554.40      | 1253546.43      | 4047565.75       | 0.90 | 5.54     | 12.27     | 26.62     | 65.44      |
| 0.50 | 86160.76       | 334824.65      | 988193.77       | 3225633.46       |      |          |           |           |            |

Table S135: Critical values for detector  $\hat{H}_{sn}^m$  and IM-OLS estimation in a model with intercept. The number of integrated regressors is 2 and the highest power of  $x_{kt}$  is 3.



| m    | 90 %          | 95 %           | 97,5 %         | 99 %            | m    | 90 %     | 95 %     | 97,5 %    | 99 %      |
|------|---------------|----------------|----------------|-----------------|------|----------|----------|-----------|-----------|
| 0.10 | 5268936820.80 | 18356196160.21 | 50083357334.50 | 161102248663.61 | 0.51 | 12321.58 | 41848.59 | 118956.98 | 337218.82 |
| 0.11 | 2768488698.95 | 9108081758.61  | 26151765862.63 | 80910747895.01  | 0.52 | 10008.72 | 33976.83 | 93129.27  | 276681.63 |
| 0.12 | 1545328740.90 | 5288700796.37  | 14773696574.86 | 45180577865.27  | 0.53 | 8099.79  | 26509.00 | 72743.91  | 219953.25 |
| 0.13 | 878045194.74  | 3014153653.67  | 8537681428.48  | 25834834224.04  | 0.54 | 6476.78  | 21787.89 | 58493.63  | 178889.44 |
| 0.14 | 532178864.45  | 1831583890.98  | 5169910826.47  | 16058018459.25  | 0.55 | 5219.94  | 17518.07 | 46223.19  | 139977.99 |
| 0.15 | 326336586.56  | 1153545541.26  | 3266141306.75  | 9976964834.43   | 0.56 | 4290.11  | 14308.12 | 38917.80  | 113157.22 |
| 0.16 | 201880820.87  | 705119240.30   | 1998360491.44  | 6423941411.17   | 0.57 | 3481.29  | 11503.31 | 30381.99  | 90180.28  |
| 0.17 | 131961275.07  | 451731433.80   | 1258272374.61  | 4109617864.61   | 0.58 | 2785.52  | 9299.00  | 24663.80  | 74028.91  |
| 0.18 | 86342864.07   | 302378899.79   | 859738596.64   | 2684359393.92   | 0.59 | 2270.09  | 7354.80  | 20046.01  | 58488.94  |
| 0.19 | 58653312.13   | 203722124.09   | 569258101.08   | 1855192997.62   | 0.60 | 1839.20  | 5929.97  | 16491.18  | 48511.84  |
| 0.20 | 39993833.76   | 138943556.92   | 388331216.86   | 1260248845.11   | 0.61 | 1525.62  | 4760.71  | 13285.39  | 38923.10  |
| 0.21 | 27597887.59   | 96034718.69    | 267201458.67   | 871460402.62    | 0.62 | 1240.35  | 3819.88  | 10502.98  | 31860.75  |
| 0.22 | 19164142.02   | 68145200.98    | 192018692.09   | 605595966.28    | 0.63 | 1009.56  | 3161.23  | 8580.97   | 25194.31  |
| 0.23 | 14160332.55   | 49281840.38    | 135847276.68   | 436698172.53    | 0.64 | 810.85   | 2473.89  | 6723.31   | 20110.81  |
| 0.24 | 10073071.61   | 35535364.58    | 98633442.37    | 320947367.30    | 0.65 | 654.76   | 1996.82  | 5338.40   | 15781.67  |
| 0.25 | 7252381.90    | 25835106.76    | 71498161.40    | 236416204.73    | 0.66 | 523.76   | 1590.37  | 4244.84   | 12238.43  |
| 0.26 | 5335795.90    | 18767726.73    | 53517688.82    | 175481590.53    | 0.67 | 424.98   | 1261.45  | 3267.64   | 10092.31  |
| 0.27 | 4031845.33    | 14101505.33    | 39515289.06    | 126122700.96    | 0.68 | 344.20   | 999.45   | 2552.13   | 8001.95   |
| 0.28 | 2983549.79    | 10384059.66    | 29207660.07    | 93488988.04     | 0.69 | 284.11   | 801.84   | 2042.73   | 6228.09   |
| 0.29 | 2191603.90    | 7790640.71     | 21947520.58    | 68953083.49     | 0.70 | 225.93   | 636.67   | 1633.05   | 4653.41   |
| 0.30 | 1679304.47    | 5818210.46     | 16448832.51    | 52356224.15     | 0.71 | 182.50   | 504.12   | 1309.29   | 3781.28   |
| 0.31 | 1279978.82    | 4431439.31     | 12704903.38    | 41467726.84     | 0.72 | 151.49   | 409.19   | 1031.83   | 2926.15   |
| 0.32 | 983667.86     | 3333442.33     | 9609139.63     | 31072770.63     | 0.73 | 120.77   | 327.04   | 798.36    | 2244.43   |
| 0.33 | 759238.49     | 2638092.86     | 7426225.24     | 24835554.79     | 0.74 | 96.34    | 253.43   | 618.40    | 1735.14   |
| 0.34 | 590528.47     | 2033711.78     | 5749957.89     | 19058436.02     | 0.75 | 77.32    | 199.97   | 482.06    | 1324.54   |
| 0.35 | 466256.51     | 1590624.83     | 4482555.99     | 14759839.78     | 0.76 | 61.74    | 156.32   | 378.63    | 1044.39   |
| 0.36 | 354776.24     | 1251018.99     | 3415162.07     | 11214826.39     | 0.77 | 48.90    | 123.67   | 292.10    | 799.36    |
| 0.37 | 278552.43     | 955692.13      | 2623502.76     | 8354124.21      | 0.78 | 38.42    | 95.48    | 225.40    | 601.80    |
| 0.38 | 218927.62     | 761901.98      | 2116064.81     | 6856855.44      | 0.79 | 30.47    | 73.57    | 167.82    | 443.47    |
| 0.39 | 174263.83     | 599287.93      | 1648742.71     | 5246518.68      | 0.80 | 23.54    | 55.21    | 127.83    | 317.65    |
| 0.40 | 137786.95     | 474577.63      | 1311835.43     | 4279805.32      | 0.81 | 18.58    | 41.98    | 95.74     | 245.13    |
| 0.41 | 110969.01     | 380303.14      | 1073805.29     | 3283875.27      | 0.82 | 14.52    | 32.39    | 72.21     | 179.59    |
| 0.42 | 87356.61      | 295016.74      | 832357.95      | 2655005.32      | 0.83 | 11.35    | 24.65    | 52.17     | 127.82    |
| 0.43 | 70825.95      | 239056.28      | 657939.92      | 2035335.99      | 0.84 | 8.65     | 18.12    | 38.29     | 93.11     |
| 0.44 | 55769.34      | 190259.31      | 527199.30      | 1617381.31      | 0.85 | 6.62     | 13.37    | 27.43     | 65.69     |
| 0.45 | 44995.38      | 152351.08      | 432179.38      | 1302572.68      | 0.86 | 5.01     | 9.83     | 19.47     | 46.17     |
| 0.46 | 36339.55      | 121239.71      | 341396.95      | 1039552.82      | 0.87 | 3.80     | 7.21     | 13.94     | 31.78     |
| 0.47 | 29047.63      | 99605.23       | 276571.26      | 849790.45       | 0.88 | 2.80     | 5.16     | 9.67      | 21.56     |
| 0.48 | 23489.91      | 79814.61       | 223094.94      | 679156.78       | 0.89 | 2.03     | 3.67     | 6.63      | 14.47     |
| 0.49 | 18834.41      | 62347.04       | 176157.56      | 539326.74       | 0.90 | 1.48     | 2.59     | 4.45      | 9.20      |
| 0.50 | 15120.08      | 51378.17       | 143643.05      | 420293.29       |      |          |          |           |           |

Table S136: Critical values for detector  $\hat{H}_{sn}^m$  and FM-OLS and D-OLS estimation in a model with intercept and linear trend. The number of integrated regressors is 2 and the highest power of  $x_{kt}$  is 3.

| m    | 90 %           | 95 %            | 97.5 %          | 99 %             | m    | 90 %     | 95 %      | 97.5 %    | 99 %       |
|------|----------------|-----------------|-----------------|------------------|------|----------|-----------|-----------|------------|
| 0.10 | 37255891014.77 | 133898599933.95 | 395916821849.77 | 1344921636346.50 | 0.51 | 77603.32 | 291046.22 | 864880.72 | 2744718.42 |
| 0.11 | 19581069030.93 | 71198429836.08  | 207555275009.19 | 684568486374.61  | 0.52 | 62293.76 | 233046.95 | 686989.54 | 2209106.09 |
| 0.12 | 10792831773.21 | 39525159568.93  | 116650306681.35 | 368388999022.64  | 0.53 | 49764.80 | 187645.03 | 539208.60 | 1813079.24 |
| 0.13 | 6183294376.22  | 22081426338.26  | 66684820649.81  | 225641143654.57  | 0.54 | 40431.63 | 153039.64 | 433818.35 | 1466141.21 |
| 0.14 | 3593734366.60  | 13058825430.34  | 39298699340.23  | 143635401194.40  | 0.55 | 33217.91 | 121386.02 | 356370.61 | 1172803.53 |
| 0.15 | 2158190828.02  | 7960899008.71   | 24287461666.84  | 82327777514.09   | 0.56 | 27201.35 | 97220.88  | 293242.78 | 950157.64  |
| 0.16 | 1394229193.11  | 5071235370.92   | 15197739609.91  | 52203196290.09   | 0.57 | 21855.05 | 78646.27  | 230970.73 | 739223.04  |
| 0.17 | 897778844.36   | 3223094107.38   | 9356641142.52   | 33927719317.66   | 0.58 | 17566.77 | 63146.73  | 184630.20 | 614582.72  |
| 0.18 | 589791261.87   | 2155069380.33   | 6178902142.91   | 22417625842.77   | 0.59 | 14293.25 | 50596.10  | 149804.29 | 504782.26  |
| 0.19 | 394340835.33   | 1438610532.29   | 4252100519.56   | 15175878714.05   | 0.60 | 11543.91 | 40330.78  | 120160.56 | 395455.93  |
| 0.20 | 266418665.63   | 995248058.56    | 3031976263.24   | 10152343406.10   | 0.61 | 9350.04  | 32663.20  | 96224.64  | 316695.21  |
| 0.21 | 185063573.40   | 696626174.31    | 2028607770.67   | 7024866475.51    | 0.62 | 7502.62  | 26904.00  | 75365.81  | 243193.36  |
| 0.22 | 130476229.23   | 490019955.44    | 1461195356.85   | 5082249566.16    | 0.63 | 6018.00  | 21879.11  | 61848.11  | 196700.43  |
| 0.23 | 92475914.04    | 344585728.20    | 1050285567.49   | 3526557653.01    | 0.64 | 4809.45  | 17564.96  | 49502.94  | 157018.56  |
| 0.24 | 68050072.91    | 259184182.32    | 760444113.59    | 2659332632.62    | 0.65 | 3908.56  | 13557.64  | 39147.68  | 124584.15  |
| 0.25 | 49042022.60    | 185712797.10    | 566164093.89    | 1923513095.96    | 0.66 | 3158.77  | 10737.62  | 31346.93  | 96429.83   |
| 0.26 | 35881770.28    | 136429534.86    | 40622448.38     | 1436107520.07    | 0.67 | 2512.09  | 8547.82   | 24852.36  | 76517.82   |
| 0.27 | 26380235.16    | 100770406.63    | 308666546.29    | 1071706414.06    | 0.68 | 2016.58  | 6720.09   | 19388.91  | 60498.33   |
| 0.28 | 19698559.18    | 76121851.10     | 230996531.45    | 785341879.09     | 0.69 | 1633.90  | 5334.33   | 15487.17  | 48893.21   |
| 0.29 | 14522976.53    | 55885095.06     | 170642077.50    | 593906076.07     | 0.70 | 1317.56  | 4185.08   | 12188.97  | 37130.18   |
| 0.30 | 11319125.97    | 41456024.84     | 124736932.19    | 439055166.45     | 0.71 | 1052.75  | 3396.53   | 9494.75   | 30138.50   |
| 0.31 | 8544857.82     | 31136330.78     | 93807262.30     | 335534712.38     | 0.72 | 846.76   | 2724.32   | 7655.13   | 22816.46   |
| 0.32 | 6548091.03     | 24363155.87     | 72171248.95     | 258446471.10     | 0.73 | 679.86   | 2151.64   | 5838.67   | 17371.27   |
| 0.33 | 5069218.89     | 18823766.75     | 55250723.73     | 196292713.01     | 0.74 | 535.79   | 1697.91   | 4507.66   | 13624.99   |
| 0.34 | 3941356.59     | 14389539.67     | 44612182.51     | 154905700.89     | 0.75 | 420.76   | 1319.45   | 3457.42   | 10345.15   |
| 0.35 | 3067506.21     | 11290244.61     | 34680373.84     | 118798138.36     | 0.76 | 330.01   | 1020.04   | 2635.80   | 7755.20    |
| 0.36 | 2414192.37     | 8836398.39      | 25997825.10     | 89950819.33      | 0.77 | 257.35   | 782.57    | 2036.31   | 5908.51    |
| 0.37 | 1874503.69     | 6912052.08      | 19914276.74     | 70490638.94      | 0.78 | 202.68   | 603.85    | 1526.90   | 4514.33    |
| 0.38 | 1478933.42     | 5423919.55      | 15893671.66     | 56312053.73      | 0.79 | 157.67   | 457.80    | 1179.61   | 3490.13    |
| 0.39 | 1149578.48     | 4351349.05      | 12759353.77     | 43723033.18      | 0.80 | 120.81   | 349.20    | 894.07    | 2585.47    |
| 0.40 | 904980.19      | 3463795.66      | 10093061.27     | 34048513.73      | 0.81 | 94.74    | 263.64    | 674.24    | 1899.48    |
| 0.41 | 707639.41      | 2686529.37      | 8094011.66      | 27371552.16      | 0.82 | 72.74    | 197.05    | 513.20    | 1389.86    |
| 0.42 | 566356.19      | 2102839.97      | 6380476.14      | 21729687.04      | 0.83 | 55.55    | 147.14    | 361.55    | 996.81     |
| 0.43 | 445495.57      | 1669089.57      | 4987616.99      | 17313346.44      | 0.84 | 42.59    | 107.77    | 260.97    | 710.04     |
| 0.44 | 362853.59      | 1352879.70      | 3952917.00      | 13152729.39      | 0.85 | 32.36    | 77.61     | 184.79    | 503.48     |
| 0.45 | 288907.41      | 1073934.52      | 3152813.33      | 10695824.16      | 0.86 | 24.22    | 56.14     | 129.54    | 347.14     |
| 0.46 | 232709.59      | 870168.49       | 2528879.33      | 8596328.24       | 0.87 | 17.95    | 39.96     | 90.77     | 241.41     |
| 0.47 | 186891.91      | 684073.72       | 2028451.72      | 6916024.12       | 0.88 | 13.24    | 28.78     | 61.71     | 160.88     |
| 0.48 | 149417.61      | 552661.41       | 1671830.20      | 5386633.95       | 0.89 | 9.68     | 19.83     | 41.55     | 104.86     |
| 0.49 | 119345.21      | 443401.78       | 1327956.91      | 4374932.72       | 0.90 | 7.04     | 13.91     | 28.40     | 68.58      |
| 0.50 | 95709.12       | 365198.81       | 1072068.06      | 3529678.62       |      |          |           |           |            |

Table S137: Critical values for detector  $\hat{H}_{sn}^m$  and IM-OLS estimation in a model with intercept and linear trend. The number of integrated regressors is 2 and the highest power of  $x_{kt}$  is 3.

### 3.3 Number of I(1) regressors: 3

| m    | 90 %       | 95 %       | 97,5 %     | 99 %       | m    | 90 %   | 95 %   | 97,5 % | 99 %    |
|------|------------|------------|------------|------------|------|--------|--------|--------|---------|
| 0.10 | 1676963.66 | 2966225.62 | 4759048.10 | 7950637.11 | 0.51 | 344.34 | 575.58 | 904.03 | 1468.93 |
| 0.11 | 1108190.80 | 1943629.62 | 3097263.55 | 5232490.43 | 0.52 | 298.55 | 503.19 | 779.75 | 1274.88 |
| 0.12 | 752769.16  | 1322001.25 | 2130723.22 | 3528470.61 | 0.53 | 259.57 | 440.64 | 679.25 | 1119.40 |
| 0.13 | 529703.26  | 933342.95  | 1476249.05 | 2456443.63 | 0.54 | 226.87 | 383.90 | 585.57 | 958.15  |
| 0.14 | 378332.36  | 660404.35  | 1055267.94 | 1769270.65 | 0.55 | 197.60 | 332.00 | 514.00 | 825.48  |
| 0.15 | 275776.59  | 488822.29  | 781858.76  | 1312354.55 | 0.56 | 173.02 | 291.75 | 441.19 | 703.72  |
| 0.16 | 204114.08  | 362720.23  | 583921.32  | 988681.54  | 0.57 | 150.52 | 254.15 | 384.02 | 608.68  |
| 0.17 | 152807.02  | 275036.07  | 436338.46  | 738747.83  | 0.58 | 131.40 | 218.20 | 334.89 | 522.19  |
| 0.18 | 117251.96  | 208125.47  | 334717.90  | 562005.83  | 0.59 | 113.90 | 190.91 | 292.66 | 457.30  |
| 0.19 | 90856.06   | 160873.35  | 257203.73  | 426049.21  | 0.60 | 99.62  | 164.74 | 250.68 | 400.13  |
| 0.20 | 71018.97   | 123943.89  | 199329.48  | 330912.08  | 0.61 | 86.30  | 143.90 | 217.44 | 339.99  |
| 0.21 | 56079.15   | 98422.93   | 157573.88  | 264953.67  | 0.62 | 75.66  | 124.06 | 187.82 | 297.44  |
| 0.22 | 44366.58   | 77906.44   | 126675.01  | 210327.15  | 0.63 | 65.79  | 107.80 | 163.59 | 256.68  |
| 0.23 | 35922.46   | 62654.06   | 100427.90  | 167637.22  | 0.64 | 57.10  | 93.01  | 139.91 | 216.55  |
| 0.24 | 29206.99   | 50615.16   | 81084.95   | 134085.91  | 0.65 | 48.72  | 80.65  | 120.90 | 192.05  |
| 0.25 | 23569.77   | 41090.37   | 64732.74   | 107471.06  | 0.66 | 42.08  | 69.20  | 103.75 | 164.47  |
| 0.26 | 19263.60   | 33963.23   | 53163.29   | 89411.18   | 0.67 | 36.76  | 59.75  | 88.94  | 143.00  |
| 0.27 | 15807.86   | 27809.51   | 44395.15   | 74482.37   | 0.68 | 31.69  | 51.48  | 77.96  | 120.77  |
| 0.28 | 13035.13   | 23040.39   | 36337.24   | 60307.94   | 0.69 | 27.32  | 44.50  | 66.78  | 106.67  |
| 0.29 | 10756.10   | 18971.20   | 29805.57   | 49305.50   | 0.70 | 23.53  | 38.28  | 57.89  | 90.91   |
| 0.30 | 8988.27    | 15622.17   | 24590.92   | 40429.20   | 0.71 | 20.33  | 32.92  | 49.55  | 77.22   |
| 0.31 | 7528.20    | 13014.08   | 20672.18   | 33142.76   | 0.72 | 17.56  | 28.36  | 41.79  | 65.05   |
| 0.32 | 6329.00    | 10998.10   | 17418.35   | 28282.28   | 0.73 | 15.07  | 24.07  | 35.57  | 54.38   |
| 0.33 | 5305.92    | 9158.04    | 14475.35   | 23821.50   | 0.74 | 12.90  | 20.41  | 30.25  | 46.14   |
| 0.34 | 4522.68    | 7766.66    | 12269.19   | 19964.92   | 0.75 | 10.93  | 17.45  | 25.47  | 39.04   |
| 0.35 | 3840.07    | 6665.61    | 10303.90   | 17318.70   | 0.76 | 9.33   | 14.89  | 21.88  | 33.72   |
| 0.36 | 3236.83    | 5592.70    | 8901.68    | 14405.51   | 0.77 | 7.95   | 12.54  | 18.34  | 27.97   |
| 0.37 | 2773.33    | 4820.31    | 7545.23    | 12392.39   | 0.78 | 6.71   | 10.67  | 15.61  | 23.60   |
| 0.38 | 2372.51    | 4117.00    | 6481.01    | 10512.24   | 0.79 | 5.66   | 8.84   | 12.85  | 19.44   |
| 0.39 | 2013.35    | 3502.52    | 5534.18    | 9071.59    | 0.80 | 4.71   | 7.44   | 10.75  | 16.35   |
| 0.40 | 1732.62    | 3016.37    | 4669.78    | 7799.88    | 0.81 | 3.95   | 6.21   | 8.91   | 13.50   |
| 0.41 | 1494.83    | 2594.48    | 4048.54    | 6684.31    | 0.82 | 3.26   | 5.14   | 7.40   | 11.06   |
| 0.42 | 1291.35    | 2199.33    | 3451.06    | 5701.01    | 0.83 | 2.71   | 4.26   | 6.11   | 9.05    |
| 0.43 | 1106.07    | 1885.23    | 2957.11    | 4952.23    | 0.84 | 2.21   | 3.44   | 5.01   | 7.40    |
| 0.44 | 954.14     | 1632.58    | 2565.48    | 4167.21    | 0.85 | 1.81   | 2.80   | 4.01   | 5.96    |
| 0.45 | 823.17     | 1416.95    | 2222.04    | 3621.16    | 0.86 | 1.47   | 2.25   | 3.23   | 4.79    |
| 0.46 | 714.90     | 1229.20    | 1900.29    | 3138.50    | 0.87 | 1.17   | 1.79   | 2.55   | 3.75    |
| 0.47 | 616.99     | 1047.35    | 1620.23    | 2718.35    | 0.88 | 0.93   | 1.43   | 2.01   | 2.92    |
| 0.48 | 530.65     | 913.97     | 1406.47    | 2264.95    | 0.89 | 0.72   | 1.10   | 1.54   | 2.26    |
| 0.49 | 457.60     | 775.17     | 1222.68    | 1972.47    | 0.90 | 0.55   | 0.84   | 1.18   | 1.73    |
| 0.50 | 395.66     | 673.43     | 1045.99    | 1716.18    |      |        |        |        |         |

Table S138: Critical values for detector  $\hat{H}_{sn}^m$  and FM-OLS and D-OLS estimation in a model with intercept. The number of integrated regressors is 3 and the highest power of  $x_{kt}$  is 1.

| m    | 90 %       | 95 %        | 97,5 %      | 99 %        | m    | 90 %    | 95 %    | 97,5 %  | 99 %    |
|------|------------|-------------|-------------|-------------|------|---------|---------|---------|---------|
| 0.10 | 7714593.79 | 13353284.20 | 21304914.16 | 35198675.90 | 0.51 | 1524.30 | 2552.11 | 3963.67 | 6362.91 |
| 0.11 | 5056595.81 | 8862537.97  | 13922510.48 | 23549345.22 | 0.52 | 1320.42 | 2215.09 | 3403.80 | 5462.99 |
| 0.12 | 3451779.94 | 6025095.03  | 9430334.11  | 15801350.91 | 0.53 | 1143.49 | 1902.92 | 2934.96 | 4732.46 |
| 0.13 | 2408925.66 | 4178539.80  | 6642893.08  | 10850412.86 | 0.54 | 999.54  | 1656.20 | 2539.18 | 4082.35 |
| 0.14 | 1713013.62 | 3005400.69  | 4783570.45  | 7889426.51  | 0.55 | 871.10  | 1444.55 | 2197.77 | 3530.84 |
| 0.15 | 1252599.45 | 2175495.65  | 3500099.60  | 5892087.60  | 0.56 | 760.35  | 1263.39 | 1895.01 | 3046.52 |
| 0.16 | 927287.94  | 1612958.51  | 2590028.17  | 4347104.12  | 0.57 | 663.88  | 1099.20 | 1638.56 | 2661.55 |
| 0.17 | 695984.77  | 1219278.63  | 1909158.06  | 3260739.28  | 0.58 | 577.25  | 948.79  | 1431.14 | 2250.04 |
| 0.18 | 532545.77  | 925280.64   | 1462241.06  | 2508832.37  | 0.59 | 501.32  | 823.48  | 1240.32 | 1936.03 |
| 0.19 | 413598.41  | 708936.64   | 1126156.75  | 1873796.14  | 0.60 | 432.98  | 716.10  | 1070.43 | 1660.29 |
| 0.20 | 320809.77  | 546627.29   | 869395.49   | 1458353.41  | 0.61 | 377.10  | 623.08  | 923.48  | 1447.47 |
| 0.21 | 252920.66  | 435340.22   | 677016.15   | 1115981.15  | 0.62 | 327.74  | 539.36  | 795.33  | 1244.70 |
| 0.22 | 199851.29  | 346787.09   | 544050.49   | 888704.10   | 0.63 | 286.99  | 468.34  | 692.61  | 1087.32 |
| 0.23 | 160222.53  | 279284.02   | 437350.76   | 708121.22   | 0.64 | 249.44  | 402.48  | 601.37  | 936.38  |
| 0.24 | 130046.93  | 222427.32   | 352157.41   | 584794.36   | 0.65 | 215.28  | 347.02  | 522.04  | 809.62  |
| 0.25 | 105314.96  | 179415.14   | 282670.75   | 471826.96   | 0.66 | 186.42  | 300.71  | 448.76  | 697.16  |
| 0.26 | 86174.38   | 147213.30   | 230747.46   | 385116.66   | 0.67 | 161.94  | 258.88  | 384.71  | 600.23  |
| 0.27 | 70706.75   | 121163.52   | 190423.59   | 312951.45   | 0.68 | 139.60  | 224.04  | 328.96  | 516.56  |
| 0.28 | 58442.36   | 100069.59   | 157020.06   | 261265.49   | 0.69 | 120.31  | 191.96  | 280.98  | 443.44  |
| 0.29 | 48562.44   | 83299.55    | 128909.26   | 213979.56   | 0.70 | 104.17  | 165.57  | 242.06  | 379.65  |
| 0.30 | 40443.78   | 69036.35    | 106779.86   | 178070.63   | 0.71 | 89.95   | 141.86  | 208.65  | 326.17  |
| 0.31 | 33863.22   | 57753.47    | 90084.36    | 147016.94   | 0.72 | 77.74   | 121.69  | 177.23  | 276.90  |
| 0.32 | 28451.44   | 48717.01    | 75418.57    | 123330.44   | 0.73 | 66.87   | 104.52  | 151.75  | 234.66  |
| 0.33 | 24049.00   | 41009.36    | 63436.84    | 103061.67   | 0.74 | 57.42   | 89.75   | 129.87  | 196.90  |
| 0.34 | 20257.45   | 34365.81    | 53253.65    | 87523.21    | 0.75 | 48.88   | 76.23   | 110.10  | 164.31  |
| 0.35 | 17153.53   | 29246.75    | 45125.93    | 72855.65    | 0.76 | 41.70   | 64.32   | 93.22   | 138.69  |
| 0.36 | 14534.34   | 24794.92    | 38481.62    | 61995.30    | 0.77 | 35.40   | 54.42   | 78.32   | 116.73  |
| 0.37 | 12500.40   | 21042.06    | 32618.94    | 52404.79    | 0.78 | 29.95   | 46.05   | 66.36   | 98.46   |
| 0.38 | 10654.45   | 18094.91    | 27544.31    | 45446.73    | 0.79 | 25.34   | 38.68   | 55.45   | 82.48   |
| 0.39 | 9073.27    | 15500.22    | 23776.52    | 38414.97    | 0.80 | 21.30   | 32.53   | 46.46   | 68.40   |
| 0.40 | 7756.14    | 13193.42    | 20306.85    | 32654.68    | 0.81 | 17.90   | 27.07   | 38.43   | 56.44   |
| 0.41 | 6618.85    | 11315.17    | 17309.80    | 28320.68    | 0.82 | 14.96   | 22.59   | 31.85   | 46.83   |
| 0.42 | 5692.61    | 9693.45     | 14921.69    | 23951.73    | 0.83 | 12.57   | 18.61   | 26.13   | 37.88   |
| 0.43 | 4905.84    | 8320.96     | 12858.51    | 20471.19    | 0.84 | 10.40   | 15.44   | 21.50   | 31.15   |
| 0.44 | 4239.84    | 7214.35     | 11010.50    | 17691.53    | 0.85 | 8.54    | 12.74   | 17.59   | 25.31   |
| 0.45 | 3670.48    | 6245.52     | 9509.28     | 15265.27    | 0.86 | 6.98    | 10.40   | 14.29   | 20.06   |
| 0.46 | 3178.25    | 5346.30     | 8241.94     | 13329.91    | 0.87 | 5.67    | 8.36    | 11.43   | 15.93   |
| 0.47 | 2729.62    | 4596.01     | 7084.10     | 11534.99    | 0.88 | 4.58    | 6.67    | 9.06    | 12.63   |
| 0.48 | 2345.83    | 3983.84     | 6108.27     | 10097.68    | 0.89 | 3.65    | 5.28    | 7.17    | 9.89    |
| 0.49 | 2033.00    | 3425.94     | 5326.41     | 8589.17     | 0.90 | 2.88    | 4.15    | 5.60    | 7.68    |
| 0.50 | 1760.36    | 2960.27     | 4608.67     | 7412.41     |      |         |         |         |         |

Table S139: Critical values for detector  $\hat{H}_{sn}^m$  and IM-OLS estimation in a model with intercept. The number of integrated regressors is 3 and the highest power of  $x_{kt}$  is 1.

| m    | 90 %        | 95 %        | 97,5 %      | 99 %         | m    | 90 %    | 95 %    | 97,5 %  | 99 %    |
|------|-------------|-------------|-------------|--------------|------|---------|---------|---------|---------|
| 0.10 | 29462702.20 | 48907569.05 | 74682347.75 | 115223747.63 | 0.51 | 1252.91 | 2060.27 | 3073.68 | 4794.62 |
| 0.11 | 17711868.97 | 29268092.54 | 44158073.53 | 70081321.52  | 0.52 | 1054.32 | 1730.39 | 2609.51 | 4096.93 |
| 0.12 | 11041530.34 | 18161663.42 | 27936774.04 | 44253551.18  | 0.53 | 898.06  | 1474.34 | 2216.87 | 3471.69 |
| 0.13 | 7071819.20  | 11739555.47 | 17987340.73 | 28829341.97  | 0.54 | 767.83  | 1252.06 | 1901.08 | 2971.68 |
| 0.14 | 4738133.08  | 7861166.53  | 12009647.18 | 19439864.48  | 0.55 | 664.86  | 1079.40 | 1599.51 | 2516.28 |
| 0.15 | 3247622.11  | 5448470.70  | 8254080.62  | 13194044.72  | 0.56 | 567.57  | 914.42  | 1362.30 | 2112.94 |
| 0.16 | 2289695.59  | 3834463.41  | 5841532.89  | 9328585.80   | 0.57 | 484.41  | 783.53  | 1157.22 | 1788.85 |
| 0.17 | 1628171.85  | 2708584.78  | 4211924.74  | 6653978.20   | 0.58 | 413.17  | 667.18  | 992.55  | 1526.48 |
| 0.18 | 1175542.35  | 1970993.29  | 2962697.49  | 4713133.57   | 0.59 | 355.98  | 570.91  | 857.72  | 1323.88 |
| 0.19 | 858353.31   | 1429116.55  | 2180787.25  | 3472095.88   | 0.60 | 302.53  | 487.55  | 722.17  | 1120.52 |
| 0.20 | 635019.86   | 1064087.29  | 1629831.70  | 2596279.02   | 0.61 | 259.51  | 416.03  | 619.14  | 971.53  |
| 0.21 | 476717.86   | 800264.37   | 1221582.23  | 1922451.44   | 0.62 | 221.42  | 354.76  | 525.63  | 813.86  |
| 0.22 | 362831.81   | 606431.98   | 922106.97   | 1475960.78   | 0.63 | 189.03  | 303.36  | 446.05  | 682.25  |
| 0.23 | 280849.04   | 463325.64   | 711083.59   | 1125756.33   | 0.64 | 160.72  | 257.19  | 379.65  | 579.57  |
| 0.24 | 214591.72   | 358466.06   | 551354.44   | 879087.83    | 0.65 | 136.33  | 219.51  | 320.44  | 483.70  |
| 0.25 | 167817.85   | 281766.17   | 432534.08   | 688724.94    | 0.66 | 116.39  | 184.46  | 270.31  | 409.12  |
| 0.26 | 132391.67   | 221256.02   | 335190.55   | 536399.56    | 0.67 | 98.92   | 157.74  | 230.86  | 347.47  |
| 0.27 | 105664.52   | 173524.86   | 265079.74   | 425983.43    | 0.68 | 84.00   | 133.38  | 193.28  | 289.01  |
| 0.28 | 84143.31    | 139204.92   | 211709.83   | 348340.99    | 0.69 | 70.73   | 112.22  | 163.53  | 247.96  |
| 0.29 | 67259.96    | 112484.07   | 171584.09   | 272402.70    | 0.70 | 60.53   | 95.51   | 137.81  | 208.70  |
| 0.30 | 53886.13    | 90349.00    | 137771.20   | 218498.47    | 0.71 | 50.77   | 81.01   | 117.51  | 176.98  |
| 0.31 | 43508.92    | 73061.74    | 110183.77   | 176306.69    | 0.72 | 42.91   | 67.22   | 99.28   | 150.11  |
| 0.32 | 35543.94    | 58693.29    | 90222.55    | 141581.60    | 0.73 | 35.93   | 56.80   | 82.65   | 125.50  |
| 0.33 | 28992.15    | 48193.74    | 73345.42    | 116919.30    | 0.74 | 30.21   | 47.36   | 68.71   | 104.13  |
| 0.34 | 23915.14    | 39659.71    | 59951.53    | 96517.42     | 0.75 | 25.30   | 39.78   | 57.66   | 86.95   |
| 0.35 | 19786.30    | 33002.64    | 50071.71    | 79419.64     | 0.76 | 21.28   | 33.37   | 48.11   | 71.50   |
| 0.36 | 16437.79    | 27196.17    | 41320.27    | 65169.16     | 0.77 | 17.76   | 27.90   | 39.47   | 58.89   |
| 0.37 | 13666.01    | 22716.80    | 33938.58    | 53890.76     | 0.78 | 14.79   | 23.11   | 33.28   | 48.75   |
| 0.38 | 11243.23    | 18648.35    | 28077.95    | 44713.05     | 0.79 | 12.17   | 18.86   | 26.98   | 40.13   |
| 0.39 | 9439.87     | 15777.65    | 23507.71    | 36621.87     | 0.80 | 9.96    | 15.56   | 22.36   | 33.09   |
| 0.40 | 7930.86     | 12924.67    | 19794.40    | 30872.18     | 0.81 | 8.19    | 12.61   | 18.10   | 27.46   |
| 0.41 | 6658.59     | 10954.18    | 16577.23    | 25968.49     | 0.82 | 6.68    | 10.39   | 14.81   | 21.87   |
| 0.42 | 5600.61     | 9132.08     | 13870.04    | 21915.87     | 0.83 | 5.48    | 8.48    | 11.97   | 17.39   |
| 0.43 | 4660.68     | 7673.43     | 11565.78    | 18310.24     | 0.84 | 4.36    | 6.82    | 9.61    | 14.06   |
| 0.44 | 3908.63     | 6483.50     | 9750.67     | 15471.82     | 0.85 | 3.50    | 5.32    | 7.60    | 11.10   |
| 0.45 | 3332.14     | 5478.61     | 8274.94     | 13288.71     | 0.86 | 2.76    | 4.21    | 5.90    | 8.65    |
| 0.46 | 2829.85     | 4650.44     | 7155.16     | 11142.24     | 0.87 | 2.16    | 3.28    | 4.59    | 6.71    |
| 0.47 | 2404.98     | 3956.99     | 5952.07     | 9396.54      | 0.88 | 1.66    | 2.52    | 3.56    | 5.18    |
| 0.48 | 2036.75     | 3334.34     | 5051.75     | 7936.62      | 0.89 | 1.28    | 1.92    | 2.66    | 3.87    |
| 0.49 | 1718.92     | 2846.76     | 4259.18     | 6652.99      | 0.90 | 0.96    | 1.43    | 1.99    | 2.92    |
| 0.50 | 1462.18     | 2407.29     | 3594.32     | 5621.93      |      |         |         |         |         |

Table S140: Critical values for detector  $\hat{H}_{sn}^m$  and FM-OLS and D-OLS estimation in a model with intercept and linear trend. The number of integrated regressors is 3 and the highest power of  $x_{kt}$  is 1.

| m    | 90 %         | 95 %         | 97,5 %       | 99 %         | m    | 90 %    | 95 %    | 97,5 %   | 99 %     |
|------|--------------|--------------|--------------|--------------|------|---------|---------|----------|----------|
| 0.10 | 108954218.50 | 181619295.33 | 277766577.73 | 440211599.29 | 0.51 | 4475.83 | 7327.69 | 10915.00 | 16877.42 |
| 0.11 | 65293124.47  | 108208955.51 | 164210722.04 | 264179905.77 | 0.52 | 3806.08 | 6237.86 | 9260.06  | 14443.76 |
| 0.12 | 40279930.71  | 66748386.61  | 102027800.08 | 161573498.69 | 0.53 | 3249.81 | 5312.26 | 7968.19  | 12398.61 |
| 0.13 | 25870833.20  | 43179946.57  | 66124724.25  | 104869764.70 | 0.54 | 2766.33 | 4548.22 | 6755.95  | 10577.62 |
| 0.14 | 17287444.39  | 28639159.76  | 43825152.42  | 70986392.12  | 0.55 | 2367.66 | 3891.84 | 5797.76  | 8856.97  |
| 0.15 | 11822887.86  | 19725069.25  | 30313818.28  | 48442128.88  | 0.56 | 2034.38 | 3314.03 | 4959.35  | 7560.34  |
| 0.16 | 8285333.36   | 13751146.14  | 20889368.60  | 33477793.13  | 0.57 | 1738.69 | 2813.39 | 4189.50  | 6480.76  |
| 0.17 | 5908506.02   | 9812780.92   | 14751178.75  | 23587249.00  | 0.58 | 1492.37 | 2379.13 | 3551.06  | 5524.06  |
| 0.18 | 4239379.01   | 7071799.44   | 10702166.81  | 16991183.99  | 0.59 | 1271.63 | 2035.80 | 3032.31  | 4691.66  |
| 0.19 | 3076149.57   | 5137651.59   | 7847134.22   | 12422600.24  | 0.60 | 1085.91 | 1738.23 | 2572.85  | 3981.88  |
| 0.20 | 2273905.31   | 3787757.46   | 5746196.99   | 9184235.22   | 0.61 | 930.46  | 1497.98 | 2190.40  | 3451.57  |
| 0.21 | 1703753.86   | 2814412.70   | 4308506.50   | 6825804.21   | 0.62 | 795.76  | 1282.50 | 1879.79  | 2896.42  |
| 0.22 | 1289927.72   | 2158675.52   | 3277496.74   | 5166989.84   | 0.63 | 680.07  | 1094.90 | 1601.61  | 2489.74  |
| 0.23 | 991568.33    | 1666546.55   | 2561611.80   | 4031050.56   | 0.64 | 579.37  | 929.79  | 1383.79  | 2110.48  |
| 0.24 | 773405.08    | 1284838.30   | 1963841.59   | 3123389.85   | 0.65 | 491.40  | 789.13  | 1164.93  | 1803.27  |
| 0.25 | 600320.55    | 1010834.49   | 1529568.48   | 2436830.41   | 0.66 | 415.11  | 673.89  | 988.88   | 1517.94  |
| 0.26 | 473909.68    | 786992.58    | 1203851.30   | 1897562.22   | 0.67 | 353.69  | 572.54  | 838.43   | 1269.04  |
| 0.27 | 375163.47    | 626467.56    | 955194.00    | 1469449.53   | 0.68 | 299.68  | 484.31  | 707.92   | 1061.52  |
| 0.28 | 299926.57    | 501411.00    | 772640.72    | 1205126.96   | 0.69 | 256.14  | 406.82  | 591.63   | 895.66   |
| 0.29 | 241594.71    | 403136.13    | 616336.15    | 974835.99    | 0.70 | 217.24  | 341.67  | 496.56   | 761.95   |
| 0.30 | 195467.71    | 325849.46    | 495480.48    | 795261.55    | 0.71 | 183.93  | 288.90  | 416.49   | 645.29   |
| 0.31 | 159807.85    | 265371.05    | 398182.73    | 637844.58    | 0.72 | 156.17  | 243.71  | 351.30   | 530.62   |
| 0.32 | 129536.35    | 214257.94    | 323222.24    | 516746.45    | 0.73 | 132.09  | 205.26  | 296.18   | 443.91   |
| 0.33 | 105642.81    | 175019.41    | 265394.85    | 414869.27    | 0.74 | 111.19  | 171.33  | 246.72   | 369.82   |
| 0.34 | 86504.23     | 142239.47    | 216708.54    | 342993.41    | 0.75 | 93.28   | 144.90  | 205.53   | 306.33   |
| 0.35 | 71310.01     | 117841.12    | 177905.73    | 282815.90    | 0.76 | 78.08   | 121.31  | 171.79   | 253.63   |
| 0.36 | 59152.86     | 97768.76     | 146957.76    | 232011.59    | 0.77 | 65.47   | 100.95  | 143.54   | 208.48   |
| 0.37 | 48941.47     | 81049.26     | 122942.32    | 192025.89    | 0.78 | 54.20   | 83.79   | 118.31   | 172.91   |
| 0.38 | 40881.65     | 67301.40     | 101863.57    | 158665.01    | 0.79 | 45.02   | 68.97   | 97.38    | 143.36   |
| 0.39 | 34022.77     | 55944.69     | 85508.62     | 133520.62    | 0.80 | 37.06   | 56.43   | 79.77    | 116.10   |
| 0.40 | 28446.12     | 46954.41     | 71371.82     | 110657.56    | 0.81 | 30.31   | 46.30   | 65.17    | 95.01    |
| 0.41 | 24059.66     | 39605.30     | 59939.71     | 93611.10     | 0.82 | 24.84   | 37.68   | 53.41    | 77.86    |
| 0.42 | 20322.15     | 33289.79     | 49919.08     | 78295.57     | 0.83 | 20.28   | 30.66   | 43.25    | 62.44    |
| 0.43 | 17020.38     | 28148.03     | 42028.97     | 65401.48     | 0.84 | 16.54   | 24.80   | 34.75    | 50.00    |
| 0.44 | 14235.55     | 23760.13     | 35261.53     | 55441.88     | 0.85 | 13.33   | 20.01   | 27.82    | 40.35    |
| 0.45 | 12040.39     | 19874.03     | 29837.62     | 47496.92     | 0.86 | 10.68   | 15.85   | 21.91    | 31.25    |
| 0.46 | 10221.43     | 16865.49     | 25551.20     | 40175.93     | 0.87 | 8.50    | 12.52   | 17.12    | 24.49    |
| 0.47 | 8661.53      | 14307.78     | 21663.44     | 34162.74     | 0.88 | 6.66    | 9.78    | 13.34    | 18.70    |
| 0.48 | 7360.35      | 12122.24     | 18291.27     | 28611.31     | 0.89 | 5.18    | 7.58    | 10.37    | 14.40    |
| 0.49 | 6245.98      | 10247.01     | 15476.79     | 23900.56     | 0.90 | 3.99    | 5.82    | 7.88     | 10.95    |
| 0.50 | 5283.45      | 8664.11      | 12836.64     | 20021.83     |      |         |         |          |          |

Table S141: Critical values for detector  $\hat{H}_{sn}^m$  and IM-OLS estimation in a model with intercept and linear trend. The number of integrated regressors is 3 and the highest power of  $x_{kt}$  is 1.

| m    | 90 %        | 95 %        | 97,5 %       | 99 %         | m    | 90 %    | 95 %    | 97,5 %  | 99 %    |
|------|-------------|-------------|--------------|--------------|------|---------|---------|---------|---------|
| 0.10 | 31940992.01 | 81076989.34 | 177662919.54 | 449799624.32 | 0.51 | 1115.55 | 2344.17 | 4614.24 | 9991.76 |
| 0.11 | 18891241.43 | 47574717.83 | 104505440.49 | 260964392.33 | 0.52 | 949.40  | 1980.52 | 3815.96 | 8423.45 |
| 0.12 | 11623568.29 | 29574683.24 | 65694931.71  | 158325316.64 | 0.53 | 801.87  | 1668.18 | 3209.35 | 7093.53 |
| 0.13 | 7412987.57  | 18604647.67 | 41969807.83  | 99300494.33  | 0.54 | 677.18  | 1412.80 | 2777.21 | 5780.10 |
| 0.14 | 4909450.31  | 12203646.49 | 27264263.31  | 66743053.10  | 0.55 | 583.23  | 1211.24 | 2277.48 | 4847.38 |
| 0.15 | 3305672.90  | 8452877.15  | 18711170.26  | 44080682.60  | 0.56 | 493.55  | 1029.93 | 1947.22 | 4010.01 |
| 0.16 | 2313876.74  | 5918659.47  | 12849125.36  | 30341231.32  | 0.57 | 422.64  | 867.40  | 1640.87 | 3359.50 |
| 0.17 | 1626267.55  | 4138233.74  | 8894040.38   | 21524386.20  | 0.58 | 356.06  | 730.46  | 1379.65 | 2816.81 |
| 0.18 | 1165655.87  | 2943209.79  | 6294094.76   | 15511362.47  | 0.59 | 304.76  | 616.60  | 1140.66 | 2335.13 |
| 0.19 | 848455.32   | 2126853.80  | 4543390.66   | 10964254.47  | 0.60 | 259.56  | 513.17  | 966.80  | 2024.48 |
| 0.20 | 627697.33   | 1570537.80  | 3377765.77   | 8016431.91   | 0.61 | 222.14  | 438.50  | 814.01  | 1700.52 |
| 0.21 | 473375.60   | 1161110.60  | 2517821.34   | 5984471.89   | 0.62 | 187.27  | 370.34  | 691.27  | 1451.72 |
| 0.22 | 359196.88   | 882795.91   | 1870911.19   | 4526912.24   | 0.63 | 158.74  | 314.05  | 575.85  | 1191.27 |
| 0.23 | 280643.22   | 677843.11   | 1458171.15   | 3474817.16   | 0.64 | 134.43  | 266.66  | 485.73  | 987.65  |
| 0.24 | 215893.41   | 523786.94   | 1124613.39   | 2662876.23   | 0.65 | 114.08  | 223.12  | 401.20  | 834.47  |
| 0.25 | 165081.92   | 398018.89   | 865908.12    | 2022814.14   | 0.66 | 96.66   | 186.97  | 338.16  | 688.64  |
| 0.26 | 131676.09   | 313030.41   | 667675.10    | 1553380.51   | 0.67 | 81.91   | 158.89  | 286.92  | 574.22  |
| 0.27 | 103777.65   | 247216.95   | 521301.36    | 1217212.91   | 0.68 | 69.64   | 134.13  | 240.67  | 477.55  |
| 0.28 | 82258.46    | 196314.26   | 419114.27    | 981235.12    | 0.69 | 58.92   | 113.51  | 202.32  | 405.40  |
| 0.29 | 64755.64    | 156821.12   | 327632.32    | 791420.85    | 0.70 | 49.55   | 93.71   | 166.44  | 324.42  |
| 0.30 | 52182.88    | 125041.55   | 265637.91    | 613072.88    | 0.71 | 42.03   | 77.96   | 137.50  | 266.55  |
| 0.31 | 41498.60    | 100175.49   | 209600.66    | 484000.97    | 0.72 | 35.41   | 64.99   | 113.23  | 220.54  |
| 0.32 | 34011.63    | 80545.10    | 167385.22    | 391645.00    | 0.73 | 29.58   | 53.69   | 94.87   | 179.62  |
| 0.33 | 27544.78    | 65986.42    | 137910.72    | 315091.85    | 0.74 | 24.68   | 45.16   | 75.21   | 144.82  |
| 0.34 | 22646.41    | 52042.44    | 108837.04    | 255594.36    | 0.75 | 20.62   | 37.25   | 61.90   | 119.74  |
| 0.35 | 18606.57    | 42076.12    | 89186.73     | 207741.05    | 0.76 | 17.25   | 31.08   | 51.73   | 98.28   |
| 0.36 | 15342.45    | 34926.88    | 72811.47     | 171866.73    | 0.77 | 14.11   | 25.38   | 42.33   | 80.08   |
| 0.37 | 12740.07    | 28681.56    | 59132.07     | 135791.55    | 0.78 | 11.85   | 21.06   | 34.78   | 64.22   |
| 0.38 | 10516.21    | 23668.95    | 49027.72     | 109270.15    | 0.79 | 9.64    | 16.75   | 27.87   | 49.98   |
| 0.39 | 8838.54     | 19713.52    | 40072.51     | 91308.27     | 0.80 | 7.94    | 13.67   | 22.17   | 39.24   |
| 0.40 | 7339.14     | 16438.05    | 33744.72     | 74435.05     | 0.81 | 6.49    | 11.12   | 17.87   | 31.77   |
| 0.41 | 6119.98     | 13705.46    | 27397.92     | 60635.92     | 0.82 | 5.27    | 8.89    | 14.00   | 24.44   |
| 0.42 | 5120.69     | 11514.83    | 23060.53     | 51808.03     | 0.83 | 4.29    | 7.15    | 11.13   | 19.07   |
| 0.43 | 4293.84     | 9485.52     | 18789.58     | 42909.16     | 0.84 | 3.44    | 5.74    | 8.85    | 15.19   |
| 0.44 | 3597.42     | 8032.37     | 15906.07     | 36007.89     | 0.85 | 2.75    | 4.56    | 7.00    | 11.70   |
| 0.45 | 3026.38     | 6604.22     | 13392.96     | 29829.53     | 0.86 | 2.18    | 3.57    | 5.51    | 8.95    |
| 0.46 | 2548.00     | 5624.10     | 11362.23     | 24425.84     | 0.87 | 1.69    | 2.73    | 4.13    | 6.82    |
| 0.47 | 2145.73     | 4712.14     | 9322.41      | 20417.41     | 0.88 | 1.31    | 2.09    | 3.13    | 5.05    |
| 0.48 | 1821.38     | 3934.71     | 8049.12      | 17476.87     | 0.89 | 0.99    | 1.59    | 2.37    | 3.82    |
| 0.49 | 1531.49     | 3316.38     | 6590.55      | 14593.92     | 0.90 | 0.75    | 1.18    | 1.74    | 2.73    |
| 0.50 | 1300.31     | 2793.97     | 5515.73      | 12127.49     |      |         |         |         |         |

Table S142: Critical values for detector  $\hat{H}_{sn}^m$  and FM-OLS and D-OLS estimation in a model with intercept. The number of integrated regressors is 3 and the highest power of  $x_{kt}$  is 2.

| m    | 90 %         | 95 %         | 97,5 %        | 99 %          | m    | 90 %    | 95 %     | 97,5 %   | 99 %     |
|------|--------------|--------------|---------------|---------------|------|---------|----------|----------|----------|
| 0.10 | 195406083.71 | 517734581.31 | 1194959226.64 | 3018032669.89 | 0.51 | 6155.92 | 13839.95 | 27997.95 | 64975.28 |
| 0.11 | 115567785.49 | 303891025.49 | 687752716.84  | 1728650538.22 | 0.52 | 5251.24 | 11824.58 | 23839.06 | 54614.59 |
| 0.12 | 73265690.41  | 191354062.56 | 421280688.50  | 1062233661.60 | 0.53 | 4479.53 | 9889.09  | 20352.53 | 45232.78 |
| 0.13 | 46497216.53  | 122848418.02 | 278298220.52  | 675503585.34  | 0.54 | 3786.48 | 8390.33  | 17039.59 | 38496.02 |
| 0.14 | 30621615.12  | 81287121.63  | 181459205.80  | 439727557.62  | 0.55 | 3175.13 | 7144.48  | 14418.28 | 32582.92 |
| 0.15 | 20734008.80  | 54130486.57  | 121796131.59  | 295697964.98  | 0.56 | 2705.23 | 5963.93  | 12119.30 | 27353.50 |
| 0.16 | 14215508.14  | 37252148.83  | 85722238.73   | 213255260.77  | 0.57 | 2288.65 | 5023.70  | 10162.64 | 22878.04 |
| 0.17 | 10067268.13  | 25901193.23  | 58947053.49   | 153608148.70  | 0.58 | 1937.15 | 4271.15  | 8522.92  | 19345.35 |
| 0.18 | 7134937.45   | 18298897.08  | 41765759.54   | 107527946.30  | 0.59 | 1653.56 | 3597.84  | 7177.48  | 16071.69 |
| 0.19 | 5155397.15   | 13452821.47  | 30818297.33   | 75039571.80   | 0.60 | 1394.37 | 3037.42  | 5985.10  | 13277.01 |
| 0.20 | 3808032.40   | 9905995.75   | 21977686.53   | 54463716.26   | 0.61 | 1185.80 | 2541.24  | 5043.42  | 11003.43 |
| 0.21 | 2810440.57   | 7176248.97   | 16255019.81   | 40247278.19   | 0.62 | 1002.23 | 2134.51  | 4207.65  | 9152.75  |
| 0.22 | 2150372.84   | 5426741.86   | 12149014.27   | 29971834.84   | 0.63 | 852.91  | 1800.88  | 3521.70  | 7688.69  |
| 0.23 | 1634738.99   | 4129560.47   | 9207326.26    | 23405056.80   | 0.64 | 725.93  | 1509.06  | 2951.97  | 6474.48  |
| 0.24 | 1258019.05   | 3219537.61   | 7070398.38    | 17510643.84   | 0.65 | 610.40  | 1259.95  | 2448.48  | 5299.90  |
| 0.25 | 981445.37    | 2470111.05   | 5546354.51    | 13758594.76   | 0.66 | 511.45  | 1052.44  | 2027.96  | 4454.71  |
| 0.26 | 766792.09    | 1983056.85   | 4270121.72    | 10769569.32   | 0.67 | 430.87  | 869.70   | 1684.15  | 3732.53  |
| 0.27 | 606994.85    | 1560469.18   | 3325271.78    | 8409854.80    | 0.68 | 364.83  | 727.18   | 1409.93  | 3059.62  |
| 0.28 | 475882.73    | 1203476.59   | 2651248.31    | 6440861.65    | 0.69 | 308.43  | 607.28   | 1166.98  | 2522.75  |
| 0.29 | 381440.70    | 942121.17    | 2120733.43    | 5149181.49    | 0.70 | 259.13  | 509.48   | 952.69   | 2070.21  |
| 0.30 | 306576.93    | 755682.10    | 1688820.63    | 4189629.82    | 0.71 | 215.55  | 426.90   | 776.88   | 1687.77  |
| 0.31 | 244834.31    | 606137.28    | 1344583.62    | 3290355.29    | 0.72 | 182.97  | 351.90   | 632.50   | 1343.03  |
| 0.32 | 197573.53    | 485446.32    | 1062795.55    | 2608161.68    | 0.73 | 152.53  | 290.31   | 520.00   | 1093.69  |
| 0.33 | 161028.47    | 393595.10    | 860821.19     | 2099064.76    | 0.74 | 127.58  | 241.31   | 424.90   | 854.47   |
| 0.34 | 131781.56    | 317829.65    | 692494.34     | 1722208.95    | 0.75 | 106.97  | 200.15   | 350.35   | 683.27   |
| 0.35 | 107354.00    | 260325.94    | 562343.92     | 1365580.63    | 0.76 | 88.50   | 165.59   | 286.37   | 558.93   |
| 0.36 | 87572.14     | 212132.04    | 456428.15     | 1092943.16    | 0.77 | 73.05   | 135.07   | 233.99   | 455.02   |
| 0.37 | 72579.56     | 174621.76    | 370430.25     | 900752.85     | 0.78 | 60.57   | 110.02   | 190.05   | 366.37   |
| 0.38 | 60008.05     | 144629.25    | 303410.93     | 722764.95     | 0.79 | 50.04   | 88.96    | 152.09   | 296.76   |
| 0.39 | 49947.00     | 119601.02    | 250740.87     | 594589.74     | 0.80 | 40.92   | 71.93    | 122.52   | 235.90   |
| 0.40 | 41632.26     | 99346.74     | 207295.59     | 488222.07     | 0.81 | 33.20   | 57.63    | 96.23    | 184.01   |
| 0.41 | 34685.44     | 82008.06     | 177356.67     | 411465.48     | 0.82 | 27.19   | 46.46    | 75.85    | 146.52   |
| 0.42 | 28783.68     | 68144.76     | 143656.38     | 333744.15     | 0.83 | 22.08   | 37.26    | 60.36    | 111.49   |
| 0.43 | 23992.11     | 56741.23     | 120119.95     | 280400.52     | 0.84 | 17.89   | 29.87    | 47.89    | 86.55    |
| 0.44 | 20218.88     | 46929.66     | 100305.84     | 230700.57     | 0.85 | 14.32   | 23.69    | 37.12    | 66.55    |
| 0.45 | 16904.55     | 39315.63     | 82771.68      | 197245.82     | 0.86 | 11.38   | 18.66    | 28.79    | 50.55    |
| 0.46 | 14292.33     | 32980.50     | 68891.85      | 157950.87     | 0.87 | 8.99    | 14.51    | 22.31    | 37.84    |
| 0.47 | 12172.85     | 27445.11     | 58081.04      | 134905.47     | 0.88 | 7.04    | 11.20    | 16.98    | 28.29    |
| 0.48 | 10347.94     | 23293.33     | 47392.48      | 111759.46     | 0.89 | 5.46    | 8.58     | 12.70    | 20.81    |
| 0.49 | 8746.56      | 19428.27     | 39598.31      | 93960.80      | 0.90 | 4.18    | 6.47     | 9.47     | 15.07    |
| 0.50 | 7341.40      | 16344.93     | 33316.67      | 78233.13      |      |         |          |          |          |

Table S143: Critical values for detector  $\hat{H}_{sn}^m$  and IM-OLS estimation in a model with intercept. The number of integrated regressors is 3 and the highest power of  $x_{kt}$  is 2.



| m    | 90 %         | 95 %         | 97,5 %       | 99 %         | m    | 90 %    | 95 %    | 97,5 %  | 99 %     |
|------|--------------|--------------|--------------|--------------|------|---------|---------|---------|----------|
| 0.10 | 105865638.86 | 208547641.74 | 401911463.33 | 869158160.48 | 0.51 | 2741.13 | 5021.08 | 8685.00 | 17331.16 |
| 0.11 | 61760130.33  | 121208915.63 | 228336554.90 | 497876300.95 | 0.52 | 2319.26 | 4208.04 | 7165.88 | 14322.30 |
| 0.12 | 38002776.50  | 74158306.43  | 138640112.31 | 306187663.98 | 0.53 | 1951.13 | 3581.28 | 6099.84 | 11931.91 |
| 0.13 | 24023371.37  | 46722980.42  | 87265576.80  | 185033802.97 | 0.54 | 1653.44 | 3030.34 | 5152.29 | 10048.81 |
| 0.14 | 15592357.10  | 30639629.34  | 56230357.89  | 120178922.99 | 0.55 | 1406.59 | 2540.68 | 4313.28 | 8223.34  |
| 0.15 | 10586946.37  | 20647289.67  | 38251952.90  | 80820690.69  | 0.56 | 1190.66 | 2117.47 | 3610.22 | 6887.52  |
| 0.16 | 7256863.03   | 14342764.46  | 26172858.31  | 54709195.63  | 0.57 | 1008.05 | 1794.16 | 3032.71 | 5723.98  |
| 0.17 | 5091830.52   | 9924629.01   | 18116252.50  | 38130004.40  | 0.58 | 850.54  | 1519.23 | 2579.25 | 4791.75  |
| 0.18 | 3621487.06   | 6945807.14   | 12882663.80  | 27444711.63  | 0.59 | 721.32  | 1279.69 | 2156.39 | 4009.32  |
| 0.19 | 2603983.45   | 5046433.92   | 9210008.01   | 19778971.35  | 0.60 | 610.50  | 1082.76 | 1814.63 | 3407.62  |
| 0.20 | 1897442.77   | 3699691.19   | 6678444.63   | 14218783.28  | 0.61 | 514.62  | 922.15  | 1534.97 | 2905.53  |
| 0.21 | 1415066.60   | 2728588.99   | 5005208.34   | 10587065.32  | 0.62 | 433.94  | 781.44  | 1294.19 | 2433.84  |
| 0.22 | 1055910.89   | 2030833.12   | 3705333.62   | 8000614.53   | 0.63 | 368.42  | 656.03  | 1089.93 | 2034.17  |
| 0.23 | 812411.80    | 1563778.99   | 2820167.99   | 6005786.14   | 0.64 | 309.43  | 555.36  | 910.07  | 1700.07  |
| 0.24 | 619656.36    | 1204247.83   | 2172294.84   | 4515302.96   | 0.65 | 260.93  | 456.97  | 771.05  | 1441.28  |
| 0.25 | 479550.26    | 918429.68    | 1673127.90   | 3484788.96   | 0.66 | 217.53  | 383.31  | 637.39  | 1177.12  |
| 0.26 | 372340.68    | 715958.81    | 1299203.90   | 2684052.90   | 0.67 | 184.08  | 320.37  | 531.18  | 996.80   |
| 0.27 | 288370.23    | 556667.61    | 1009979.10   | 2134571.56   | 0.68 | 153.66  | 268.18  | 435.41  | 807.69   |
| 0.28 | 230959.32    | 445820.90    | 801728.96    | 1658746.85   | 0.69 | 127.69  | 220.67  | 365.18  | 687.75   |
| 0.29 | 183086.01    | 349458.14    | 626865.17    | 1312055.38   | 0.70 | 106.10  | 185.93  | 303.34  | 555.17   |
| 0.30 | 145501.78    | 278343.98    | 504466.69    | 1051863.64   | 0.71 | 89.53   | 153.96  | 250.42  | 457.95   |
| 0.31 | 116124.97    | 219289.92    | 396732.89    | 827777.68    | 0.72 | 74.51   | 128.46  | 205.73  | 371.09   |
| 0.32 | 93424.84     | 178348.11    | 321220.65    | 661292.63    | 0.73 | 61.81   | 105.77  | 169.85  | 300.69   |
| 0.33 | 76366.68     | 143051.56    | 257286.65    | 532553.40    | 0.74 | 51.23   | 86.57   | 138.11  | 240.24   |
| 0.34 | 61286.10     | 116071.85    | 209862.73    | 427519.27    | 0.75 | 42.45   | 71.41   | 113.45  | 198.27   |
| 0.35 | 50061.31     | 95226.34     | 171501.50    | 355933.26    | 0.76 | 35.21   | 59.18   | 93.43   | 161.52   |
| 0.36 | 40842.83     | 77316.86     | 137970.77    | 291519.04    | 0.77 | 28.78   | 48.23   | 75.53   | 128.79   |
| 0.37 | 33947.62     | 63457.86     | 112486.52    | 231905.01    | 0.78 | 23.80   | 39.50   | 62.01   | 106.58   |
| 0.38 | 27921.87     | 51902.75     | 91146.14     | 190990.72    | 0.79 | 19.01   | 31.85   | 49.77   | 82.56    |
| 0.39 | 22969.48     | 42737.07     | 76360.58     | 153692.32    | 0.80 | 15.62   | 25.55   | 38.92   | 64.78    |
| 0.40 | 19142.15     | 35402.51     | 63138.89     | 124700.62    | 0.81 | 12.56   | 20.52   | 31.23   | 51.86    |
| 0.41 | 15921.72     | 29127.46     | 53155.34     | 106072.73    | 0.82 | 10.13   | 16.53   | 24.86   | 41.03    |
| 0.42 | 13286.54     | 24395.16     | 43215.19     | 87056.73     | 0.83 | 8.22    | 13.02   | 19.57   | 31.77    |
| 0.43 | 11020.12     | 20249.70     | 35519.60     | 73303.47     | 0.84 | 6.52    | 10.41   | 15.63   | 25.14    |
| 0.44 | 9238.07      | 17069.44     | 30073.64     | 60057.28     | 0.85 | 5.09    | 8.13    | 11.98   | 19.24    |
| 0.45 | 7674.79      | 14397.20     | 24902.24     | 48538.28     | 0.86 | 3.97    | 6.29    | 9.32    | 14.57    |
| 0.46 | 6470.16      | 12084.23     | 20951.12     | 41266.66     | 0.87 | 3.02    | 4.77    | 6.96    | 10.85    |
| 0.47 | 5462.53      | 10072.02     | 17622.47     | 33646.76     | 0.88 | 2.30    | 3.59    | 5.25    | 8.05     |
| 0.48 | 4567.31      | 8562.13      | 14950.55     | 29131.32     | 0.89 | 1.73    | 2.70    | 3.92    | 5.92     |
| 0.49 | 3875.51      | 7080.89      | 12311.33     | 24763.93     | 0.90 | 1.27    | 1.96    | 2.81    | 4.25     |
| 0.50 | 3262.41      | 5979.54      | 10404.09     | 20371.73     |      |         |         |         |          |

Table S144: Critical values for detector  $\hat{H}_{sn}^m$  and FM-OLS and D-OLS estimation in a model with intercept and linear trend. The number of integrated regressors is 3 and the highest power of  $x_{kt}$  is 2.

| m    | 90 %         | 95 %         | 97,5 %        | 99 %          | m    | 90 %     | 95 %     | 97,5 %   | 99 %     |
|------|--------------|--------------|---------------|---------------|------|----------|----------|----------|----------|
| 0.10 | 467724348.26 | 957046260.20 | 1897748840.71 | 4442263759.61 | 0.51 | 11279.04 | 21348.39 | 38392.39 | 81616.79 |
| 0.11 | 266534563.37 | 562365776.15 | 1102419666.54 | 2498942297.07 | 0.52 | 9501.91  | 17973.32 | 32304.97 | 69243.28 |
| 0.12 | 163868384.67 | 338943303.41 | 665117765.99  | 1527870460.21 | 0.53 | 8099.55  | 15209.25 | 27437.53 | 57223.03 |
| 0.13 | 105722845.86 | 213611071.36 | 419818720.95  | 942528781.22  | 0.54 | 6868.05  | 12877.74 | 23063.73 | 47815.02 |
| 0.14 | 67982804.79  | 139119437.02 | 271300280.21  | 633304200.96  | 0.55 | 5801.18  | 11007.15 | 19497.88 | 39983.63 |
| 0.15 | 45655039.39  | 93341950.81  | 180471850.40  | 416155122.53  | 0.56 | 4912.51  | 9242.93  | 16601.16 | 32749.54 |
| 0.16 | 30776308.51  | 63468995.15  | 125546767.94  | 287673548.47  | 0.57 | 4139.22  | 7780.37  | 13715.84 | 27527.36 |
| 0.17 | 21495186.56  | 44441075.38  | 87072307.44   | 196158583.92  | 0.58 | 3482.84  | 6527.49  | 11451.76 | 23392.66 |
| 0.18 | 15287188.10  | 31046053.44  | 61106029.16   | 140059103.40  | 0.59 | 2938.61  | 5462.66  | 9763.75  | 19628.20 |
| 0.19 | 10953450.71  | 22362853.78  | 44236432.99   | 100917703.45  | 0.60 | 2482.99  | 4593.58  | 8151.95  | 16631.76 |
| 0.20 | 8020838.54   | 16177838.63  | 32396606.16   | 72175843.14   | 0.61 | 2082.37  | 3872.37  | 6725.09  | 13946.13 |
| 0.21 | 5913358.78   | 11882974.99  | 22787444.90   | 51740462.21   | 0.62 | 1768.42  | 3265.45  | 5761.92  | 11502.83 |
| 0.22 | 4423442.89   | 8928636.68   | 17289159.92   | 39049795.21   | 0.63 | 1505.04  | 2766.45  | 4828.79  | 9554.31  |
| 0.23 | 3362450.79   | 6726174.18   | 13260907.40   | 28841178.31   | 0.64 | 1270.63  | 2308.88  | 4001.46  | 7864.06  |
| 0.24 | 2588433.37   | 5178587.58   | 9858321.12    | 21962542.48   | 0.65 | 1062.28  | 1955.03  | 3318.44  | 6518.84  |
| 0.25 | 1996531.43   | 3993604.45   | 7574484.17    | 16910150.42   | 0.66 | 890.68   | 1627.92  | 2747.12  | 5479.97  |
| 0.26 | 1554443.14   | 3095520.22   | 5916885.80    | 13228389.44   | 0.67 | 744.40   | 1344.94  | 2304.30  | 4493.90  |
| 0.27 | 1216463.89   | 2437295.73   | 4676497.90    | 10523852.63   | 0.68 | 621.80   | 1122.43  | 1920.10  | 3678.65  |
| 0.28 | 969101.24    | 1901287.55   | 3616783.71    | 8206514.06    | 0.69 | 516.89   | 933.23   | 1588.09  | 3054.46  |
| 0.29 | 767706.95    | 1505555.70   | 2866493.60    | 6449270.81    | 0.70 | 430.81   | 772.42   | 1307.31  | 2528.81  |
| 0.30 | 612621.57    | 1212121.92   | 2303421.04    | 5072216.58    | 0.71 | 361.75   | 641.11   | 1081.45  | 2064.34  |
| 0.31 | 492173.95    | 982259.93    | 1860855.24    | 3948177.28    | 0.72 | 302.14   | 522.42   | 877.18   | 1705.72  |
| 0.32 | 392379.28    | 782888.22    | 1481353.97    | 3229004.67    | 0.73 | 251.34   | 433.85   | 720.21   | 1372.75  |
| 0.33 | 317344.26    | 627699.71    | 1182233.66    | 2592674.07    | 0.74 | 208.02   | 357.62   | 580.57   | 1098.50  |
| 0.34 | 257850.00    | 508879.76    | 958693.42     | 2090765.93    | 0.75 | 172.25   | 293.94   | 470.88   | 887.89   |
| 0.35 | 210648.23    | 412707.11    | 764251.57     | 1670151.87    | 0.76 | 141.88   | 243.63   | 385.09   | 705.28   |
| 0.36 | 171494.52    | 336427.94    | 623932.14     | 1355558.18    | 0.77 | 117.67   | 197.56   | 317.07   | 566.27   |
| 0.37 | 141393.41    | 273753.68    | 509913.31     | 1120083.07    | 0.78 | 96.62    | 161.88   | 259.15   | 459.66   |
| 0.38 | 116301.68    | 228961.66    | 418629.37     | 907853.00     | 0.79 | 78.81    | 131.41   | 206.62   | 367.26   |
| 0.39 | 95940.57     | 186651.04    | 339111.65     | 729502.40     | 0.80 | 63.92    | 105.67   | 165.76   | 294.86   |
| 0.40 | 79702.20     | 153187.11    | 281843.63     | 610054.28     | 0.81 | 51.30    | 84.86    | 131.86   | 231.34   |
| 0.41 | 66434.03     | 126627.84    | 235312.50     | 504124.02     | 0.82 | 41.25    | 67.43    | 105.04   | 183.40   |
| 0.42 | 54966.28     | 106275.78    | 193582.33     | 411876.14     | 0.83 | 32.92    | 53.55    | 83.23    | 142.97   |
| 0.43 | 45783.51     | 87712.28     | 160470.50     | 345768.23     | 0.84 | 26.26    | 42.57    | 64.99    | 110.59   |
| 0.44 | 38017.87     | 73423.19     | 134067.92     | 290855.92     | 0.85 | 20.71    | 33.27    | 50.51    | 86.26    |
| 0.45 | 32076.11     | 61615.72     | 112705.56     | 239496.00     | 0.86 | 16.31    | 25.93    | 39.20    | 64.36    |
| 0.46 | 27023.31     | 51665.62     | 93748.78      | 194562.48     | 0.87 | 12.69    | 19.97    | 29.78    | 48.62    |
| 0.47 | 22977.80     | 43204.01     | 77988.59      | 166639.61     | 0.88 | 9.76     | 15.31    | 22.46    | 35.83    |
| 0.48 | 19161.00     | 36258.12     | 65353.29      | 137950.76     | 0.89 | 7.45     | 11.57    | 16.64    | 26.11    |
| 0.49 | 16070.31     | 30478.35     | 54917.85      | 116634.54     | 0.90 | 5.61     | 8.59     | 12.35    | 18.64    |
| 0.50 | 13396.71     | 25534.63     | 46046.30      | 96998.85      |      |          |          |          |          |

Table S145: Critical values for detector  $\hat{H}_{sn}^m$  and IM-OLS estimation in a model with intercept and linear trend. The number of integrated regressors is 3 and the highest power of  $x_{kt}$  is 2.

| m    | 90 %          | 95 %           | 97,5 %         | 99 %            | m    | 90 %    | 95 %     | 97,5 %   | 99 %      |
|------|---------------|----------------|----------------|-----------------|------|---------|----------|----------|-----------|
| 0.10 | 3150354516.74 | 11690487743.46 | 34241857817.02 | 113450356388.01 | 0.51 | 8951.96 | 30902.41 | 85952.07 | 271480.05 |
| 0.11 | 1694856464.86 | 6226476722.34  | 18550621486.92 | 62209433084.39  | 0.52 | 7156.36 | 24921.57 | 69543.38 | 209409.70 |
| 0.12 | 946062522.44  | 3455650971.58  | 10350298237.95 | 33129115176.67  | 0.53 | 5817.76 | 19356.26 | 55956.33 | 166188.70 |
| 0.13 | 560282238.99  | 2012322088.41  | 6101659806.45  | 19359080214.47  | 0.54 | 4672.11 | 15615.37 | 44455.88 | 138831.45 |
| 0.14 | 325703637.24  | 1204444586.05  | 3659763684.40  | 12020830555.33  | 0.55 | 3797.33 | 12665.42 | 36170.30 | 112519.05 |
| 0.15 | 203342392.01  | 751603850.48   | 2246026981.97  | 7550231180.60   | 0.56 | 3071.18 | 10256.34 | 28270.87 | 87036.05  |
| 0.16 | 130690472.94  | 485866554.76   | 1418096180.32  | 4689825293.35   | 0.57 | 2581.47 | 8482.41  | 23084.15 | 69359.22  |
| 0.17 | 85027736.44   | 316222068.51   | 898073039.82   | 3060687456.82   | 0.58 | 2098.11 | 6759.85  | 18705.30 | 61084.67  |
| 0.18 | 57218406.49   | 211553443.62   | 611272787.90   | 2056970757.78   | 0.59 | 1664.11 | 5576.89  | 15075.23 | 45973.34  |
| 0.19 | 39334767.37   | 141532628.77   | 400968583.79   | 1392004432.47   | 0.60 | 1359.49 | 4394.10  | 12065.53 | 37568.00  |
| 0.20 | 26855527.06   | 98520519.18    | 282084808.53   | 924788696.77    | 0.61 | 1097.49 | 3583.15  | 9976.13  | 31360.01  |
| 0.21 | 18976417.03   | 69256620.41    | 198564739.16   | 654107583.90    | 0.62 | 909.16  | 2938.91  | 7978.53  | 24317.27  |
| 0.22 | 13276073.04   | 48361814.22    | 139100424.65   | 466759713.19    | 0.63 | 735.64  | 2337.00  | 6288.44  | 19076.84  |
| 0.23 | 9389947.08    | 35312025.96    | 101370474.55   | 333046529.59    | 0.64 | 587.52  | 1870.08  | 5118.14  | 15381.81  |
| 0.24 | 6929427.98    | 25613612.50    | 75070270.59    | 236694403.97    | 0.65 | 477.11  | 1484.96  | 3927.59  | 12101.94  |
| 0.25 | 5074622.89    | 18683287.00    | 54908181.25    | 175105776.75    | 0.66 | 378.61  | 1182.74  | 3124.81  | 9293.55   |
| 0.26 | 3775582.35    | 13866715.00    | 40034856.48    | 127865636.92    | 0.67 | 310.88  | 948.01   | 2472.89  | 7561.91   |
| 0.27 | 2753983.67    | 10098178.01    | 29797203.00    | 95206590.97     | 0.68 | 250.56  | 747.12   | 1973.99  | 5709.42   |
| 0.28 | 2067396.96    | 7450973.02     | 22042831.32    | 72133546.84     | 0.69 | 200.41  | 596.60   | 1527.30  | 4429.40   |
| 0.29 | 1556784.34    | 5644143.21     | 16436506.89    | 53160392.38     | 0.70 | 162.02  | 480.10   | 1211.08  | 3539.44   |
| 0.30 | 1184145.71    | 4329883.26     | 12563058.26    | 38955504.37     | 0.71 | 128.18  | 378.60   | 944.93   | 2821.55   |
| 0.31 | 910863.82     | 3293247.72     | 9443663.53     | 30046207.05     | 0.72 | 104.47  | 301.49   | 756.62   | 2214.17   |
| 0.32 | 696246.61     | 2512017.83     | 7382834.36     | 23477749.79     | 0.73 | 84.72   | 237.86   | 612.13   | 1745.24   |
| 0.33 | 541336.20     | 1918654.13     | 5718400.92     | 18612527.48     | 0.74 | 66.87   | 186.49   | 469.17   | 1346.75   |
| 0.34 | 415846.94     | 1503396.22     | 4339828.00     | 13933627.42     | 0.75 | 53.61   | 144.78   | 363.98   | 1029.14   |
| 0.35 | 328873.82     | 1177973.03     | 3416291.22     | 10806981.41     | 0.76 | 43.29   | 116.00   | 280.15   | 800.36    |
| 0.36 | 256374.85     | 932904.80      | 2678527.32     | 8623002.96      | 0.77 | 34.36   | 90.16    | 213.49   | 616.44    |
| 0.37 | 202380.80     | 727351.29      | 2102727.12     | 6715163.96      | 0.78 | 27.25   | 70.57    | 167.58   | 452.50    |
| 0.38 | 156266.37     | 567874.40      | 1654911.94     | 5224551.59      | 0.79 | 21.28   | 53.81    | 127.59   | 342.79    |
| 0.39 | 126589.68     | 444410.86      | 1251848.27     | 4139095.04      | 0.80 | 16.80   | 41.63    | 95.53    | 254.15    |
| 0.40 | 101252.87     | 351732.61      | 988982.12      | 3222725.38      | 0.81 | 13.24   | 31.70    | 72.10    | 190.40    |
| 0.41 | 80452.77      | 283108.92      | 802922.60      | 2539852.47      | 0.82 | 10.21   | 23.87    | 54.07    | 143.52    |
| 0.42 | 64038.77      | 225050.28      | 635942.06      | 2004007.18      | 0.83 | 7.95    | 17.88    | 41.00    | 103.63    |
| 0.43 | 50732.84      | 180486.48      | 507422.05      | 1533160.43      | 0.84 | 6.17    | 13.37    | 29.58    | 75.81     |
| 0.44 | 40240.11      | 143410.30      | 413904.70      | 1203910.43      | 0.85 | 4.78    | 9.95     | 21.27    | 54.71     |
| 0.45 | 31857.28      | 115215.76      | 324277.10      | 974177.69       | 0.86 | 3.59    | 7.26     | 14.81    | 37.19     |
| 0.46 | 25576.63      | 92963.97       | 257792.92      | 781502.34       | 0.87 | 2.70    | 5.33     | 10.23    | 25.66     |
| 0.47 | 21096.39      | 74348.57       | 203611.83      | 641905.35       | 0.88 | 2.03    | 3.86     | 7.24     | 17.49     |
| 0.48 | 16926.79      | 59679.52       | 163918.98      | 522226.58       | 0.89 | 1.50    | 2.79     | 5.05     | 11.36     |
| 0.49 | 13606.18      | 47564.69       | 135455.32      | 415756.38       | 0.90 | 1.08    | 1.97     | 3.52     | 7.29      |
| 0.50 | 11053.72      | 38424.08       | 111421.87      | 334970.46       |      |         |          |          |           |

Table S146: Critical values for detector  $\hat{H}_{sn}^m$  and FM-OLS and D-OLS estimation in a model with intercept. The number of integrated regressors is 3 and the highest power of  $x_{kt}$  is 3.

| m    | 90 %           | 95 %            | 97.5 %          | 99 %             | m    | 90 %     | 95 %      | 97.5 %    | 99 %       |
|------|----------------|-----------------|-----------------|------------------|------|----------|-----------|-----------|------------|
| 0.10 | 30073994647.24 | 116672657061.76 | 370303340948.32 | 1328532944713.40 | 0.51 | 80834.50 | 295144.53 | 850942.13 | 2770924.25 |
| 0.11 | 15906904071.37 | 62551051938.38  | 197416803335.35 | 713198046651.64  | 0.52 | 63799.62 | 234762.49 | 686098.97 | 2256725.80 |
| 0.12 | 9036630135.42  | 34698811409.89  | 109639801882.94 | 407765514815.86  | 0.53 | 52062.51 | 188748.32 | 550858.29 | 1825099.87 |
| 0.13 | 5287484111.55  | 20584237414.83  | 65134814801.10  | 235280236696.42  | 0.54 | 42225.38 | 153452.28 | 457747.31 | 1501602.78 |
| 0.14 | 3083897527.28  | 12188930996.40  | 37627058939.79  | 143183623942.95  | 0.55 | 34277.41 | 125316.47 | 362957.99 | 1201502.73 |
| 0.15 | 1880346166.19  | 7463978884.96   | 23594064894.08  | 87798372380.04   | 0.56 | 27840.50 | 101302.23 | 290622.40 | 958357.83  |
| 0.16 | 1217985827.97  | 4762533271.56   | 15198313038.63  | 55523047121.93   | 0.57 | 22602.82 | 82595.00  | 237041.99 | 737865.95  |
| 0.17 | 796113832.90   | 3125521117.45   | 9553671524.94   | 34527350705.82   | 0.58 | 18548.69 | 65401.85  | 187130.93 | 583549.54  |
| 0.18 | 538649647.56   | 2094633610.97   | 6457213738.82   | 23327923932.03   | 0.59 | 15095.75 | 53591.40  | 152435.18 | 478567.12  |
| 0.19 | 366449699.23   | 1383143956.74   | 4306316325.07   | 15344893571.62   | 0.60 | 12144.82 | 42788.53  | 121067.97 | 388742.74  |
| 0.20 | 247993167.06   | 977933224.78    | 2953131971.38   | 10695789417.49   | 0.61 | 9792.71  | 35233.32  | 98694.42  | 313298.13  |
| 0.21 | 172897332.24   | 680658689.83    | 2055045124.82   | 7437930649.21    | 0.62 | 7923.95  | 28840.10  | 81355.57  | 254479.23  |
| 0.22 | 120432851.80   | 466535531.93    | 1467748974.28   | 5157306354.27    | 0.63 | 6317.07  | 22862.79  | 63946.81  | 204337.13  |
| 0.23 | 85604657.82    | 330239559.67    | 1030959012.20   | 3625230134.66    | 0.64 | 5049.70  | 18136.93  | 51079.01  | 157636.06  |
| 0.24 | 63301370.01    | 246480258.43    | 750147721.30    | 2573866210.18    | 0.65 | 4060.06  | 14349.60  | 41328.14  | 130468.69  |
| 0.25 | 45878354.64    | 179846782.18    | 562071384.87    | 1996637280.01    | 0.66 | 3255.02  | 11291.79  | 32791.81  | 107298.91  |
| 0.26 | 33892252.99    | 130839714.96    | 396462883.09    | 1430911475.96    | 0.67 | 2604.81  | 9168.95   | 25447.09  | 81967.05   |
| 0.27 | 25134430.16    | 96009871.05     | 302916360.60    | 1070907561.22    | 0.68 | 2060.16  | 7242.84   | 19990.32  | 65782.60   |
| 0.28 | 18443364.51    | 71611422.14     | 220550730.75    | 801925757.00     | 0.69 | 1654.09  | 5783.76   | 15659.32  | 51367.04   |
| 0.29 | 13980937.67    | 54432115.37     | 163395741.16    | 578279786.04     | 0.70 | 1327.51  | 4491.65   | 12258.90  | 39022.14   |
| 0.30 | 10785706.52    | 40878845.23     | 122504532.83    | 433116621.66     | 0.71 | 1050.89  | 3542.28   | 9742.41   | 30193.35   |
| 0.31 | 8124177.29     | 30763440.25     | 93947259.99     | 324439906.46     | 0.72 | 833.04   | 2797.95   | 7614.07   | 23548.34   |
| 0.32 | 6343679.31     | 23537926.22     | 72754015.00     | 245264358.44     | 0.73 | 661.12   | 2217.11   | 5944.58   | 18973.54   |
| 0.33 | 4897116.22     | 18426682.80     | 56811008.03     | 192507516.53     | 0.74 | 522.64   | 1731.86   | 4680.36   | 14228.03   |
| 0.34 | 3807321.56     | 14346824.62     | 43818172.11     | 151456022.72     | 0.75 | 415.63   | 1316.56   | 3539.33   | 10981.07   |
| 0.35 | 2973401.64     | 11100486.81     | 33861437.45     | 117586143.27     | 0.76 | 325.10   | 1015.48   | 2778.28   | 8216.38    |
| 0.36 | 2341272.44     | 8947782.84      | 26739470.82     | 91391489.61      | 0.77 | 258.77   | 786.92    | 2156.52   | 6273.26    |
| 0.37 | 1829513.09     | 6961636.91      | 20909193.56     | 70665442.07      | 0.78 | 202.08   | 608.24    | 1619.29   | 4818.61    |
| 0.38 | 1462900.91     | 5499852.09      | 16546524.76     | 56362408.89      | 0.79 | 157.01   | 462.74    | 1193.96   | 3668.49    |
| 0.39 | 1147826.90     | 4378022.81      | 12621645.94     | 44208595.65      | 0.80 | 120.80   | 349.39    | 877.34    | 2708.57    |
| 0.40 | 930159.20      | 3470561.98      | 10089707.01     | 34570081.78      | 0.81 | 92.77    | 264.74    | 688.79    | 2049.96    |
| 0.41 | 741167.83      | 2714850.72      | 7809783.41      | 27462508.30      | 0.82 | 71.41    | 200.19    | 523.54    | 1439.99    |
| 0.42 | 589020.66      | 2154611.31      | 6346106.81      | 21406127.83      | 0.83 | 54.56    | 148.79    | 377.19    | 1019.58    |
| 0.43 | 461958.07      | 1698892.43      | 5049088.06      | 16780631.06      | 0.84 | 41.31    | 108.77    | 269.30    | 754.86     |
| 0.44 | 365674.87      | 1370123.12      | 3946862.93      | 13490907.06      | 0.85 | 30.93    | 79.55     | 195.90    | 541.57     |
| 0.45 | 287658.62      | 1077969.38      | 3199043.90      | 10572857.62      | 0.86 | 23.34    | 57.04     | 138.17    | 374.64     |
| 0.46 | 227964.18      | 861613.69       | 2528358.28      | 8254626.42       | 0.87 | 17.32    | 40.40     | 95.20     | 250.60     |
| 0.47 | 183926.12      | 689575.36       | 2070474.88      | 6616690.81       | 0.88 | 12.71    | 29.06     | 66.44     | 166.97     |
| 0.48 | 149236.91      | 558573.23       | 1645240.83      | 5456338.19       | 0.89 | 9.45     | 20.53     | 45.30     | 111.59     |
| 0.49 | 122521.30      | 452349.74       | 1331117.78      | 4293867.11       | 0.90 | 6.91     | 13.98     | 30.25     | 72.63      |
| 0.50 | 99277.73       | 365589.11       | 1075042.22      | 3398551.73       |      |          |           |           |            |

Table S147: Critical values for detector  $\hat{H}_{sn}^m$  and IM-OLS estimation in a model with intercept. The number of integrated regressors is 3 and the highest power of  $x_{kt}$  is 3.

| m    | 90 %          | 95 %           | 97,5 %         | 99 %            | m    | 90 %     | 95 %     | 97,5 %    | 99 %      |
|------|---------------|----------------|----------------|-----------------|------|----------|----------|-----------|-----------|
| 0.10 | 6453197576.38 | 22369092522.73 | 61189494137.51 | 191884246744.86 | 0.51 | 14741.36 | 49811.39 | 137510.72 | 398573.43 |
| 0.11 | 3389873796.07 | 11610938796.00 | 32323636169.31 | 103914999505.26 | 0.52 | 11878.34 | 39686.61 | 108273.93 | 324518.94 |
| 0.12 | 1881675521.81 | 6312429529.76  | 18258063681.52 | 56572804155.05  | 0.53 | 9681.68  | 30462.60 | 86265.69  | 261377.59 |
| 0.13 | 1081014154.14 | 3651226084.41  | 10528508233.09 | 32033514643.15  | 0.54 | 7807.23  | 24579.54 | 69693.49  | 208919.00 |
| 0.14 | 624518974.34  | 2187094112.16  | 6371047425.89  | 19948591306.21  | 0.55 | 6385.20  | 20183.71 | 55863.09  | 164417.79 |
| 0.15 | 387175501.87  | 1339557087.79  | 3842126982.48  | 12329877641.01  | 0.56 | 5180.54  | 15949.85 | 44669.69  | 135053.37 |
| 0.16 | 245875183.10  | 850575547.18   | 2402873696.22  | 7841783619.50   | 0.57 | 4286.09  | 13152.16 | 35929.71  | 107640.38 |
| 0.17 | 157672188.63  | 552722933.53   | 1512836787.90  | 4910828462.14   | 0.58 | 3464.65  | 10742.20 | 28792.16  | 89757.42  |
| 0.18 | 103660742.08  | 369199242.79   | 1006259221.53  | 3243660496.27   | 0.59 | 2811.99  | 8673.26  | 23259.52  | 71103.23  |
| 0.19 | 69299984.58   | 244296023.49   | 676029055.70   | 2216023571.73   | 0.60 | 2276.51  | 7083.07  | 18752.70  | 57003.17  |
| 0.20 | 48198540.06   | 169693813.16   | 470573259.81   | 1485633822.74   | 0.61 | 1863.06  | 5838.33  | 15285.63  | 47220.30  |
| 0.21 | 33458056.40   | 115921492.79   | 328213331.64   | 1060675788.38   | 0.62 | 1537.81  | 4700.93  | 12218.68  | 36953.11  |
| 0.22 | 23257949.25   | 82227853.94    | 234240669.49   | 735450283.50    | 0.63 | 1240.91  | 3688.52  | 9671.33   | 28856.55  |
| 0.23 | 16426675.32   | 58383795.19    | 168413228.63   | 528103370.39    | 0.64 | 1006.17  | 2947.93  | 7864.96   | 23433.29  |
| 0.24 | 11989539.23   | 42157821.07    | 120545703.62   | 381992662.22    | 0.65 | 820.93   | 2388.33  | 6262.51   | 17864.43  |
| 0.25 | 8775374.46    | 30925058.78    | 87108315.86    | 272135602.82    | 0.66 | 658.87   | 1863.48  | 4914.86   | 14248.21  |
| 0.26 | 6383103.84    | 22917999.84    | 65489917.12    | 197931178.41    | 0.67 | 538.33   | 1492.98  | 3846.79   | 11150.52  |
| 0.27 | 4778030.12    | 17022081.93    | 48338776.83    | 147666031.99    | 0.68 | 435.14   | 1175.52  | 3010.88   | 8672.55   |
| 0.28 | 3573236.95    | 12686530.86    | 35299391.35    | 111933668.77    | 0.69 | 347.58   | 953.06   | 2344.02   | 6650.49   |
| 0.29 | 2650588.47    | 9276955.14     | 25811541.24    | 80560062.28     | 0.70 | 283.68   | 756.86   | 1903.96   | 5418.32   |
| 0.30 | 1982345.95    | 7051836.53     | 19869106.87    | 59054160.98     | 0.71 | 229.89   | 605.04   | 1469.16   | 4210.92   |
| 0.31 | 1529400.80    | 5305540.94     | 14827245.80    | 47919141.04     | 0.72 | 187.00   | 474.07   | 1162.70   | 3234.29   |
| 0.32 | 1161698.69    | 4049478.31     | 11775885.23    | 36547132.04     | 0.73 | 150.61   | 378.46   | 933.74    | 2571.93   |
| 0.33 | 897267.85     | 3132230.15     | 8865069.08     | 27452706.24     | 0.74 | 121.09   | 296.47   | 711.24    | 1975.45   |
| 0.34 | 689451.62     | 2362570.22     | 6913612.68     | 21282792.23     | 0.75 | 96.69    | 234.06   | 546.94    | 1484.34   |
| 0.35 | 541754.19     | 1860924.58     | 5362731.36     | 16403764.79     | 0.76 | 77.47    | 185.24   | 428.24    | 1177.51   |
| 0.36 | 420296.12     | 1471012.40     | 4273529.03     | 12831192.13     | 0.77 | 61.25    | 144.94   | 330.19    | 910.95    |
| 0.37 | 338637.94     | 1161094.66     | 3346050.29     | 10325295.30     | 0.78 | 49.03    | 114.30   | 251.91    | 657.23    |
| 0.38 | 261421.14     | 906141.14      | 2592719.56     | 8111709.99      | 0.79 | 38.32    | 86.86    | 197.14    | 508.88    |
| 0.39 | 210928.10     | 717865.07      | 2000474.99     | 6198170.16      | 0.80 | 30.51    | 67.17    | 147.82    | 378.49    |
| 0.40 | 165227.38     | 565234.31      | 1553976.92     | 4993708.01      | 0.81 | 23.47    | 51.43    | 110.42    | 284.89    |
| 0.41 | 133659.55     | 454643.87      | 1228076.30     | 3837048.65      | 0.82 | 18.34    | 39.08    | 83.95     | 221.65    |
| 0.42 | 105916.42     | 360578.11      | 982635.82      | 3033267.30      | 0.83 | 14.15    | 29.37    | 61.99     | 159.89    |
| 0.43 | 83214.53      | 286064.32      | 776254.76      | 2383651.83      | 0.84 | 10.83    | 22.05    | 45.39     | 112.96    |
| 0.44 | 66838.52      | 228560.83      | 636445.68      | 1854688.98      | 0.85 | 8.30     | 16.38    | 33.13     | 83.16     |
| 0.45 | 53266.63      | 181324.64      | 505335.53      | 1507908.74      | 0.86 | 6.27     | 11.85    | 22.88     | 56.50     |
| 0.46 | 43292.53      | 143509.27      | 390822.24      | 1186440.40      | 0.87 | 4.66     | 8.63     | 16.32     | 38.81     |
| 0.47 | 35021.19      | 113665.33      | 310193.97      | 973006.07       | 0.88 | 3.44     | 6.23     | 11.47     | 26.82     |
| 0.48 | 27917.88      | 92029.42       | 260253.95      | 798212.94       | 0.89 | 2.52     | 4.47     | 7.81      | 17.43     |
| 0.49 | 22282.30      | 76017.74       | 210390.40      | 629179.81       | 0.90 | 1.80     | 3.12     | 5.35      | 11.26     |
| 0.50 | 18036.06      | 61382.66       | 175698.08      | 513155.00       |      |          |          |           |           |

Table S148: Critical values for detector  $\hat{H}_{sn}^m$  and FM-OLS and D-OLS estimation in a model with intercept and linear trend. The number of integrated regressors is 3 and the highest power of  $x_{kt}$  is 3.

| m    | 90 %           | 95 %            | 97.5 %          | 99 %             | m    | 90 %     | 95 %      | 97.5 %    | 99 %       |
|------|----------------|-----------------|-----------------|------------------|------|----------|-----------|-----------|------------|
| 0.10 | 44219793600.09 | 159609699831.83 | 473150834418.11 | 1605500276200.43 | 0.51 | 91779.46 | 326711.82 | 940710.17 | 3060520.97 |
| 0.11 | 22999204424.55 | 83686708105.72  | 252476155809.11 | 847819487788.39  | 0.52 | 74203.41 | 260178.90 | 757983.64 | 2486151.11 |
| 0.12 | 12709291761.66 | 45913157225.98  | 138913320177.89 | 487489056375.17  | 0.53 | 60800.65 | 212071.79 | 618466.65 | 2028282.54 |
| 0.13 | 7151918911.34  | 26370458597.91  | 79652532363.62  | 272640294519.42  | 0.54 | 49210.37 | 173726.34 | 496314.09 | 1650054.09 |
| 0.14 | 4220385556.31  | 15675427398.38  | 45978211155.67  | 163934827581.63  | 0.55 | 40075.80 | 142046.51 | 401123.17 | 1311824.58 |
| 0.15 | 2569670066.92  | 9475406889.23   | 29318117230.95  | 98052836306.77   | 0.56 | 32618.28 | 111572.04 | 320974.95 | 1056548.04 |
| 0.16 | 1616064226.77  | 5910945710.15   | 18047792838.20  | 64252416384.00   | 0.57 | 26610.64 | 89752.44  | 252168.74 | 811625.34  |
| 0.17 | 1061634995.02  | 3839218783.19   | 11302770826.60  | 38490491488.49   | 0.58 | 21444.20 | 72462.12  | 204321.59 | 642034.26  |
| 0.18 | 696494370.86   | 2544051364.00   | 7786321879.73   | 25510046053.45   | 0.59 | 17345.69 | 59309.22  | 171783.40 | 512766.72  |
| 0.19 | 470154793.23   | 1719647325.55   | 5029814228.61   | 17945614861.66   | 0.60 | 14080.66 | 48018.32  | 137701.06 | 414153.46  |
| 0.20 | 316789458.42   | 1184526426.35   | 3496303881.00   | 12166104442.31   | 0.61 | 11634.31 | 39338.25  | 108492.75 | 340206.23  |
| 0.21 | 218529024.88   | 821054901.31    | 2479268301.07   | 8116491429.58    | 0.62 | 9589.17  | 32196.53  | 87423.81  | 272944.16  |
| 0.22 | 155497892.44   | 577149001.92    | 1735710661.11   | 5809408030.94    | 0.63 | 7607.34  | 25542.93  | 71512.00  | 222716.79  |
| 0.23 | 109144464.85   | 405791084.77    | 1201892361.01   | 4078637033.04    | 0.64 | 6018.81  | 20349.12  | 56920.23  | 175578.96  |
| 0.24 | 79188083.20    | 291770984.68    | 873805213.68    | 2907174485.13    | 0.65 | 4861.89  | 16256.27  | 45980.74  | 137154.82  |
| 0.25 | 57325080.27    | 214385623.31    | 648108801.03    | 2223923740.46    | 0.66 | 3865.28  | 13014.97  | 36340.81  | 109066.69  |
| 0.26 | 41622021.97    | 155235783.01    | 467835643.44    | 1621115756.19    | 0.67 | 3094.05  | 10245.26  | 28928.02  | 88685.40   |
| 0.27 | 30869377.79    | 110884070.30    | 343396646.28    | 1227860772.84    | 0.68 | 2456.88  | 8014.40   | 22646.16  | 69283.21   |
| 0.28 | 22797104.12    | 83483596.14     | 253434556.49    | 877244894.12     | 0.69 | 1948.93  | 6344.32   | 17425.63  | 55463.04   |
| 0.29 | 17281632.43    | 63869674.37     | 188838789.80    | 628549296.26     | 0.70 | 1577.29  | 5018.13   | 13705.38  | 44038.45   |
| 0.30 | 13128658.77    | 47036881.98     | 137410672.98    | 465329314.94     | 0.71 | 1263.24  | 3865.77   | 10567.73  | 34459.13   |
| 0.31 | 9946154.67     | 35461436.79     | 105652245.33    | 348749683.59     | 0.72 | 1012.75  | 3098.86   | 8443.87   | 26619.81   |
| 0.32 | 7546850.96     | 27256419.88     | 81005210.84     | 278207297.60     | 0.73 | 809.95   | 2410.29   | 6503.22   | 20542.75   |
| 0.33 | 5765848.51     | 21321108.73     | 62876268.12     | 211159256.54     | 0.74 | 644.70   | 1894.94   | 5142.25   | 15593.08   |
| 0.34 | 4521641.60     | 16228353.53     | 49078045.54     | 163839743.18     | 0.75 | 507.07   | 1448.72   | 3969.40   | 12153.34   |
| 0.35 | 3528181.18     | 12517507.75     | 37447601.96     | 125852307.12     | 0.76 | 402.19   | 1139.90   | 3049.33   | 9314.29    |
| 0.36 | 2776361.40     | 9818012.63      | 28734438.97     | 95735353.95      | 0.77 | 320.05   | 883.76    | 2333.96   | 7206.19    |
| 0.37 | 2208325.51     | 7858029.18      | 22494691.99     | 74372055.65      | 0.78 | 251.99   | 683.73    | 1764.49   | 5424.35    |
| 0.38 | 1719723.20     | 6243235.83      | 17912602.34     | 59556706.04      | 0.79 | 197.76   | 528.43    | 1320.45   | 3879.44    |
| 0.39 | 1368055.51     | 4968095.44      | 13757633.62     | 45650104.98      | 0.80 | 153.06   | 394.62    | 980.47    | 2883.70    |
| 0.40 | 1072443.14     | 3879169.76      | 11032814.62     | 36724132.71      | 0.81 | 117.38   | 298.95    | 727.19    | 2169.72    |
| 0.41 | 829829.63      | 3069260.85      | 8671806.61      | 28216854.11      | 0.82 | 90.52    | 224.48    | 545.17    | 1542.41    |
| 0.42 | 670833.93      | 2421519.18      | 6941783.06      | 22978165.40      | 0.83 | 70.47    | 167.19    | 395.67    | 1071.59    |
| 0.43 | 528149.15      | 1911369.96      | 5583469.54      | 17923690.24      | 0.84 | 53.56    | 123.51    | 280.35    | 782.26     |
| 0.44 | 421460.68      | 1533400.86      | 4468917.37      | 14242422.46      | 0.85 | 40.95    | 90.43     | 204.50    | 560.16     |
| 0.45 | 332701.64      | 1208213.25      | 3544546.46      | 11223644.84      | 0.86 | 30.77    | 66.46     | 147.39    | 372.39     |
| 0.46 | 265053.21      | 984443.05       | 2870698.01      | 9125170.38       | 0.87 | 22.79    | 47.70     | 102.36    | 259.07     |
| 0.47 | 213465.06      | 783696.10       | 2327565.50      | 7386633.31       | 0.88 | 16.88    | 34.31     | 71.20     | 174.31     |
| 0.48 | 174742.60      | 636171.31       | 1863666.63      | 5931911.64       | 0.89 | 12.27    | 24.03     | 49.39     | 120.49     |
| 0.49 | 140239.13      | 508668.73       | 1487697.73      | 4691700.89       | 0.90 | 8.87     | 16.84     | 33.79     | 77.55      |
| 0.50 | 112806.14      | 408487.79       | 1176412.03      | 3698190.83       |      |          |           |           |            |

Table S149: Critical values for detector  $\hat{H}_{sn}^m$  and IM-OLS estimation in a model with intercept and linear trend. The number of integrated regressors is 3 and the highest power of  $x_{kt}$  is 3.

### 3.4 Number of I(1) regressors: 4

| m    | 90 %       | 95 %       | 97,5 %     | 99 %        | m    | 90 %   | 95 %    | 97,5 %  | 99 %    |
|------|------------|------------|------------|-------------|------|--------|---------|---------|---------|
| 0.10 | 3263009.78 | 5548086.66 | 8654870.30 | 14030966.61 | 0.51 | 613.92 | 1029.46 | 1572.26 | 2486.75 |
| 0.11 | 2161386.24 | 3692999.00 | 5666363.43 | 9145331.98  | 0.52 | 535.48 | 897.33  | 1353.10 | 2158.18 |
| 0.12 | 1481878.31 | 2507687.84 | 3882761.50 | 6282833.48  | 0.53 | 459.73 | 768.32  | 1168.91 | 1848.47 |
| 0.13 | 1030574.95 | 1760187.83 | 2714953.60 | 4347917.00  | 0.54 | 397.54 | 660.32  | 1009.91 | 1600.74 |
| 0.14 | 731891.77  | 1269295.81 | 1927358.93 | 3076685.33  | 0.55 | 348.09 | 575.01  | 856.77  | 1359.33 |
| 0.15 | 528443.80  | 923923.56  | 1439110.56 | 2303312.46  | 0.56 | 298.96 | 497.88  | 743.32  | 1180.10 |
| 0.16 | 392932.26  | 680811.99  | 1059182.24 | 1701918.04  | 0.57 | 257.82 | 430.94  | 645.28  | 1007.45 |
| 0.17 | 295892.62  | 503925.33  | 794421.24  | 1268900.63  | 0.58 | 221.24 | 364.66  | 547.35  | 858.53  |
| 0.18 | 226428.87  | 384954.38  | 596795.80  | 991375.34   | 0.59 | 192.79 | 315.48  | 473.56  | 741.21  |
| 0.19 | 172599.67  | 296060.47  | 458422.09  | 747030.72   | 0.60 | 167.89 | 271.80  | 409.16  | 635.13  |
| 0.20 | 135775.31  | 227981.84  | 352356.20  | 581818.49   | 0.61 | 144.99 | 236.95  | 353.24  | 547.05  |
| 0.21 | 107186.98  | 181667.27  | 280684.98  | 459292.30   | 0.62 | 126.38 | 205.28  | 303.81  | 478.68  |
| 0.22 | 85333.38   | 144654.61  | 224561.71  | 357032.31   | 0.63 | 108.71 | 177.09  | 263.99  | 413.55  |
| 0.23 | 68395.43   | 115930.47  | 178000.60  | 282923.93   | 0.64 | 94.12  | 152.81  | 227.78  | 354.54  |
| 0.24 | 55095.34   | 93349.45   | 142808.85  | 230074.14   | 0.65 | 80.80  | 131.14  | 195.30  | 302.06  |
| 0.25 | 44236.74   | 75187.61   | 117189.77  | 189549.77   | 0.66 | 69.01  | 112.54  | 167.05  | 260.15  |
| 0.26 | 36246.11   | 61813.85   | 95133.26   | 157450.07   | 0.67 | 59.42  | 96.53   | 143.36  | 219.28  |
| 0.27 | 29731.80   | 50373.18   | 77984.90   | 124891.80   | 0.68 | 51.11  | 82.62   | 122.17  | 193.00  |
| 0.28 | 24500.78   | 41935.15   | 64848.45   | 103931.42   | 0.69 | 44.07  | 71.27   | 104.43  | 165.15  |
| 0.29 | 20265.78   | 34854.99   | 52978.53   | 86495.52    | 0.70 | 37.88  | 61.39   | 90.93   | 141.09  |
| 0.30 | 16875.89   | 28501.31   | 43889.70   | 71763.99    | 0.71 | 32.57  | 52.21   | 76.63   | 118.16  |
| 0.31 | 14052.53   | 23811.42   | 36280.21   | 59816.33    | 0.72 | 27.52  | 44.18   | 65.67   | 101.32  |
| 0.32 | 11743.73   | 19858.20   | 30594.25   | 49748.74    | 0.73 | 23.54  | 37.24   | 55.29   | 86.60   |
| 0.33 | 9891.23    | 16735.73   | 25765.00   | 41663.50    | 0.74 | 20.04  | 32.05   | 46.84   | 71.97   |
| 0.34 | 8360.10    | 14229.09   | 21590.03   | 35352.71    | 0.75 | 17.01  | 27.13   | 39.66   | 60.93   |
| 0.35 | 7039.15    | 11888.11   | 18315.11   | 29895.86    | 0.76 | 14.44  | 22.83   | 33.38   | 51.25   |
| 0.36 | 6015.48    | 10037.21   | 15506.67   | 24586.57    | 0.77 | 12.32  | 19.10   | 27.77   | 42.27   |
| 0.37 | 5042.60    | 8494.57    | 13084.43   | 20982.49    | 0.78 | 10.22  | 16.06   | 23.18   | 34.77   |
| 0.38 | 4297.27    | 7216.58    | 10891.56   | 17686.70    | 0.79 | 8.55   | 13.41   | 19.29   | 28.60   |
| 0.39 | 3703.97    | 6182.21    | 9366.96    | 15137.53    | 0.80 | 7.12   | 11.12   | 15.93   | 23.12   |
| 0.40 | 3166.49    | 5288.97    | 8109.30    | 12917.49    | 0.81 | 5.87   | 9.16    | 13.16   | 19.42   |
| 0.41 | 2711.31    | 4552.30    | 6985.74    | 11399.02    | 0.82 | 4.84   | 7.50    | 10.66   | 15.79   |
| 0.42 | 2335.09    | 3923.60    | 5985.61    | 9790.80     | 0.83 | 3.94   | 6.11    | 8.71    | 12.83   |
| 0.43 | 1997.81    | 3341.26    | 5149.18    | 8226.16     | 0.84 | 3.19   | 4.98    | 7.11    | 10.46   |
| 0.44 | 1721.45    | 2901.27    | 4426.48    | 7083.45     | 0.85 | 2.56   | 3.98    | 5.73    | 8.38    |
| 0.45 | 1481.16    | 2470.59    | 3772.80    | 6119.41     | 0.86 | 2.07   | 3.19    | 4.55    | 6.64    |
| 0.46 | 1269.22    | 2135.02    | 3247.00    | 5284.62     | 0.87 | 1.63   | 2.51    | 3.55    | 5.19    |
| 0.47 | 1094.80    | 1824.28    | 2777.03    | 4556.45     | 0.88 | 1.27   | 1.95    | 2.75    | 4.01    |
| 0.48 | 945.10     | 1587.35    | 2437.51    | 3889.46     | 0.89 | 0.98   | 1.47    | 2.09    | 3.04    |
| 0.49 | 816.82     | 1383.19    | 2101.08    | 3368.59     | 0.90 | 0.74   | 1.12    | 1.58    | 2.31    |
| 0.50 | 711.08     | 1188.28    | 1810.33    | 2884.71     |      |        |         |         |         |

Table S150: Critical values for detector  $\hat{H}_{sn}^m$  and FM-OLS and D-OLS estimation in a model with intercept. The number of integrated regressors is 4 and the highest power of  $x_{kt}$  is 1.

| m    | 90 %        | 95 %        | 97,5 %      | 99 %        | m    | 90 %    | 95 %    | 97,5 %  | 99 %     |
|------|-------------|-------------|-------------|-------------|------|---------|---------|---------|----------|
| 0.10 | 15558072.66 | 26382310.72 | 40973334.55 | 66650053.90 | 0.51 | 2860.13 | 4692.15 | 7053.01 | 11083.20 |
| 0.11 | 10262149.25 | 17432529.40 | 27104476.26 | 43946072.62 | 0.52 | 2469.24 | 4074.66 | 6089.88 | 9539.09  |
| 0.12 | 6993584.53  | 11866626.72 | 18264558.45 | 29489224.88 | 0.53 | 2154.84 | 3509.96 | 5271.76 | 8349.27  |
| 0.13 | 4868288.19  | 8145564.67  | 12521561.12 | 20650265.26 | 0.54 | 1874.71 | 3053.97 | 4563.43 | 7209.49  |
| 0.14 | 3462581.97  | 5816111.87  | 9018442.54  | 14840060.12 | 0.55 | 1618.90 | 2644.65 | 3937.10 | 6225.21  |
| 0.15 | 2496701.29  | 4244353.32  | 6583044.40  | 10839460.70 | 0.56 | 1397.93 | 2282.68 | 3441.04 | 5281.88  |
| 0.16 | 1851868.54  | 3151761.54  | 4864562.00  | 8048777.03  | 0.57 | 1210.97 | 1969.86 | 2937.50 | 4525.11  |
| 0.17 | 1394888.87  | 2363879.16  | 3645502.47  | 6080189.85  | 0.58 | 1044.70 | 1689.03 | 2526.74 | 3881.32  |
| 0.18 | 1058990.04  | 1801056.88  | 2773961.51  | 4517818.29  | 0.59 | 904.31  | 1456.92 | 2186.91 | 3350.93  |
| 0.19 | 819661.06   | 1383381.19  | 2133777.07  | 3438009.27  | 0.60 | 787.22  | 1262.33 | 1871.02 | 2903.85  |
| 0.20 | 644804.44   | 1086863.01  | 1653325.37  | 2656585.93  | 0.61 | 676.50  | 1090.13 | 1607.33 | 2480.47  |
| 0.21 | 505950.07   | 855155.66   | 1310108.15  | 2113957.34  | 0.62 | 587.44  | 945.68  | 1389.78 | 2121.50  |
| 0.22 | 397738.32   | 675882.63   | 1035212.15  | 1640341.92  | 0.63 | 510.06  | 823.54  | 1189.96 | 1820.34  |
| 0.23 | 319443.71   | 537642.61   | 828902.01   | 1329995.37  | 0.64 | 440.07  | 706.10  | 1036.32 | 1571.70  |
| 0.24 | 256992.84   | 433619.09   | 668240.99   | 1079950.58  | 0.65 | 379.04  | 607.00  | 895.62  | 1350.93  |
| 0.25 | 210112.56   | 354467.37   | 543195.50   | 878687.42   | 0.66 | 326.84  | 520.53  | 764.57  | 1151.99  |
| 0.26 | 170985.06   | 287260.09   | 445596.64   | 707714.94   | 0.67 | 280.72  | 444.47  | 656.19  | 1000.72  |
| 0.27 | 140662.40   | 236177.13   | 360375.97   | 575754.80   | 0.68 | 241.05  | 383.42  | 555.66  | 859.21   |
| 0.28 | 116145.89   | 192513.98   | 295330.81   | 473166.26   | 0.69 | 205.86  | 326.08  | 472.86  | 731.58   |
| 0.29 | 95614.75    | 160293.83   | 242952.41   | 392812.21   | 0.70 | 175.55  | 277.89  | 406.04  | 623.23   |
| 0.30 | 78869.70    | 132716.92   | 205187.36   | 327112.23   | 0.71 | 150.08  | 238.21  | 347.25  | 529.90   |
| 0.31 | 65748.94    | 111476.99   | 170706.45   | 273751.92   | 0.72 | 128.59  | 202.74  | 293.41  | 453.14   |
| 0.32 | 55430.33    | 92599.11    | 143935.01   | 229867.84   | 0.73 | 109.12  | 172.09  | 248.84  | 377.61   |
| 0.33 | 46359.56    | 77387.15    | 121052.79   | 193194.48   | 0.74 | 93.16   | 145.96  | 210.72  | 319.44   |
| 0.34 | 38760.99    | 65557.70    | 100497.05   | 161358.13   | 0.75 | 79.45   | 123.25  | 178.11  | 270.11   |
| 0.35 | 32674.36    | 55248.28    | 84897.22    | 135785.40   | 0.76 | 67.11   | 103.79  | 150.10  | 225.93   |
| 0.36 | 27632.88    | 46796.18    | 71157.26    | 114726.73   | 0.77 | 56.48   | 87.51   | 126.63  | 188.69   |
| 0.37 | 23446.59    | 39197.63    | 60155.34    | 96053.06    | 0.78 | 47.65   | 73.33   | 105.00  | 155.85   |
| 0.38 | 20092.79    | 33444.29    | 51023.54    | 80681.18    | 0.79 | 39.90   | 61.28   | 86.92   | 129.58   |
| 0.39 | 17152.48    | 28468.69    | 43143.27    | 68731.89    | 0.80 | 33.36   | 50.69   | 71.91   | 105.55   |
| 0.40 | 14662.28    | 24498.86    | 36926.01    | 59344.68    | 0.81 | 27.70   | 42.21   | 59.14   | 86.26    |
| 0.41 | 12629.32    | 20893.88    | 31912.47    | 51375.29    | 0.82 | 22.91   | 34.68   | 48.80   | 70.81    |
| 0.42 | 10892.57    | 17991.86    | 27258.60    | 43923.43    | 0.83 | 18.93   | 28.43   | 40.09   | 58.25    |
| 0.43 | 9289.13     | 15407.98    | 23346.29    | 37209.60    | 0.84 | 15.40   | 23.20   | 32.58   | 47.26    |
| 0.44 | 7999.15     | 13348.21    | 20127.79    | 32022.71    | 0.85 | 12.54   | 18.73   | 26.39   | 37.50    |
| 0.45 | 6903.58     | 11472.10    | 17135.68    | 27248.54    | 0.86 | 10.13   | 15.11   | 21.10   | 30.05    |
| 0.46 | 5954.48     | 9899.16     | 14859.96    | 23264.05    | 0.87 | 8.11    | 12.06   | 16.80   | 23.61    |
| 0.47 | 5149.18     | 8500.90     | 12899.17    | 20035.44    | 0.88 | 6.44    | 9.49    | 13.09   | 18.39    |
| 0.48 | 4423.80     | 7327.95     | 11020.09    | 17437.54    | 0.89 | 5.06    | 7.38    | 10.03   | 14.20    |
| 0.49 | 3810.66     | 6354.47     | 9474.73     | 14868.43    | 0.90 | 3.93    | 5.70    | 7.68    | 10.77    |
| 0.50 | 3289.27     | 5466.57     | 8179.49     | 12742.43    |      |         |         |         |          |

Table S151: Critical values for detector  $\hat{H}_{sn}^m$  and IM-OLS estimation in a model with intercept. The number of integrated regressors is 4 and the highest power of  $x_{kt}$  is 1.



| m    | 90 %        | 95 %        | 97,5 %       | 99 %         | m    | 90 %    | 95 %    | 97,5 %  | 99 %    |
|------|-------------|-------------|--------------|--------------|------|---------|---------|---------|---------|
| 0.10 | 48964790.85 | 79315921.48 | 119064157.32 | 186807844.86 | 0.51 | 1935.03 | 3142.47 | 4694.30 | 7219.44 |
| 0.11 | 29217501.06 | 47904827.30 | 72025290.69  | 112738479.76 | 0.52 | 1655.38 | 2695.15 | 4002.58 | 6118.34 |
| 0.12 | 18042539.92 | 29388977.35 | 44106597.82  | 68730028.75  | 0.53 | 1402.95 | 2262.96 | 3350.10 | 5193.64 |
| 0.13 | 11512641.70 | 18814216.59 | 28379347.62  | 44622370.11  | 0.54 | 1208.49 | 1936.42 | 2865.83 | 4391.86 |
| 0.14 | 7769623.97  | 12718208.52 | 18888194.52  | 29684652.90  | 0.55 | 1019.20 | 1636.50 | 2419.27 | 3794.14 |
| 0.15 | 5279424.59  | 8683892.11  | 13162132.07  | 20431987.65  | 0.56 | 863.41  | 1407.53 | 2072.19 | 3220.94 |
| 0.16 | 3685658.67  | 6087011.60  | 9000928.65   | 14427785.18  | 0.57 | 738.51  | 1199.09 | 1755.03 | 2691.50 |
| 0.17 | 2626923.94  | 4275721.49  | 6434040.30   | 10025506.46  | 0.58 | 626.91  | 1006.96 | 1485.95 | 2271.76 |
| 0.18 | 1891739.17  | 3093475.65  | 4649887.27   | 7396630.63   | 0.59 | 533.39  | 855.39  | 1273.61 | 1964.24 |
| 0.19 | 1380937.41  | 2288584.85  | 3425229.02   | 5302543.46   | 0.60 | 456.20  | 734.13  | 1071.88 | 1645.90 |
| 0.20 | 1031116.31  | 1694140.05  | 2579411.76   | 3979196.24   | 0.61 | 388.02  | 620.56  | 905.13  | 1397.44 |
| 0.21 | 771165.52   | 1271634.69  | 1917253.78   | 3040426.05   | 0.62 | 331.06  | 528.28  | 773.27  | 1205.97 |
| 0.22 | 579952.57   | 960399.92   | 1456714.38   | 2316017.67   | 0.63 | 281.37  | 448.67  | 657.80  | 1002.72 |
| 0.23 | 448342.45   | 741882.28   | 1114336.57   | 1768125.62   | 0.64 | 238.27  | 380.14  | 559.41  | 854.53  |
| 0.24 | 346932.12   | 571003.77   | 853540.67    | 1353224.91   | 0.65 | 202.42  | 320.30  | 475.79  | 724.49  |
| 0.25 | 271789.97   | 448246.78   | 669802.19    | 1049110.54   | 0.66 | 171.27  | 273.24  | 403.55  | 618.77  |
| 0.26 | 212702.98   | 348166.71   | 519781.52    | 810139.85    | 0.67 | 144.98  | 230.55  | 338.17  | 521.14  |
| 0.27 | 167943.23   | 275136.84   | 413781.53    | 637633.99    | 0.68 | 121.98  | 194.91  | 286.54  | 438.90  |
| 0.28 | 134095.96   | 219655.32   | 330223.71    | 514009.29    | 0.69 | 103.73  | 164.82  | 244.39  | 366.44  |
| 0.29 | 106425.10   | 176731.62   | 263284.43    | 414166.21    | 0.70 | 87.73   | 139.57  | 203.12  | 307.74  |
| 0.30 | 86626.62    | 141231.58   | 211668.50    | 329722.63    | 0.71 | 73.98   | 116.32  | 169.12  | 253.63  |
| 0.31 | 70400.74    | 114650.02   | 170551.30    | 266881.06    | 0.72 | 62.00   | 97.35   | 142.84  | 214.49  |
| 0.32 | 57267.21    | 93600.01    | 141524.56    | 218792.46    | 0.73 | 52.03   | 82.06   | 118.93  | 179.91  |
| 0.33 | 46686.44    | 76358.52    | 114910.69    | 179398.89    | 0.74 | 43.68   | 68.88   | 99.25   | 149.52  |
| 0.34 | 38249.09    | 62869.32    | 93412.02     | 148537.42    | 0.75 | 36.24   | 57.30   | 81.71   | 123.13  |
| 0.35 | 31386.18    | 51287.96    | 76679.63     | 118673.02    | 0.76 | 30.25   | 47.22   | 68.05   | 101.66  |
| 0.36 | 25780.88    | 42531.37    | 62727.70     | 97163.50     | 0.77 | 24.97   | 38.75   | 55.71   | 82.44   |
| 0.37 | 21470.78    | 35219.50    | 52500.71     | 80602.28     | 0.78 | 20.57   | 31.87   | 45.22   | 67.32   |
| 0.38 | 17812.93    | 29129.78    | 43473.25     | 67095.88     | 0.79 | 16.98   | 26.39   | 37.50   | 55.11   |
| 0.39 | 14831.74    | 24467.23    | 35844.26     | 55059.07     | 0.80 | 13.79   | 21.34   | 30.29   | 43.94   |
| 0.40 | 12548.67    | 20364.90    | 30106.22     | 46250.01     | 0.81 | 11.24   | 17.37   | 24.72   | 36.41   |
| 0.41 | 10484.24    | 17195.49    | 25305.40     | 39024.13     | 0.82 | 9.19    | 14.04   | 20.12   | 29.04   |
| 0.42 | 8803.79     | 14350.11    | 21430.45     | 32744.76     | 0.83 | 7.39    | 11.25   | 16.01   | 23.39   |
| 0.43 | 7353.36     | 11997.70    | 17752.70     | 27856.76     | 0.84 | 5.92    | 9.08    | 12.73   | 18.36   |
| 0.44 | 6175.23     | 10102.02    | 15034.22     | 23489.97     | 0.85 | 4.64    | 7.06    | 10.09   | 14.47   |
| 0.45 | 5240.70     | 8540.94     | 12773.17     | 19830.87     | 0.86 | 3.67    | 5.57    | 7.81    | 11.36   |
| 0.46 | 4450.76     | 7180.68     | 10695.79     | 16679.45     | 0.87 | 2.84    | 4.30    | 6.07    | 8.62    |
| 0.47 | 3745.30     | 6080.35     | 9041.66      | 14240.11     | 0.88 | 2.16    | 3.28    | 4.58    | 6.64    |
| 0.48 | 3178.03     | 5157.10     | 7653.51      | 11985.98     | 0.89 | 1.64    | 2.46    | 3.39    | 4.91    |
| 0.49 | 2702.18     | 4391.98     | 6494.55      | 10068.38     | 0.90 | 1.23    | 1.84    | 2.53    | 3.62    |
| 0.50 | 2292.76     | 3704.36     | 5463.57      | 8510.52      |      |         |         |         |         |

Table S152: Critical values for detector  $\hat{H}_{sn}^m$  and FM-OLS and D-OLS estimation in a model with intercept and linear trend. The number of integrated regressors is 4 and the highest power of  $x_{kt}$  is 1.

| m    | 90 %         | 95 %         | 97,5 %       | 99 %         | m    | 90 %    | 95 %     | 97,5 %   | 99 %     |
|------|--------------|--------------|--------------|--------------|------|---------|----------|----------|----------|
| 0.10 | 193137427.92 | 315189855.10 | 470539025.65 | 739623978.95 | 0.51 | 7610.59 | 12298.84 | 18378.37 | 28959.59 |
| 0.11 | 114850688.31 | 186216892.01 | 278956492.95 | 443703686.27 | 0.52 | 6500.47 | 10422.23 | 15527.24 | 24226.95 |
| 0.12 | 71690243.69  | 117001697.90 | 171256557.94 | 271922444.75 | 0.53 | 5496.19 | 8836.10  | 13220.02 | 20382.19 |
| 0.13 | 45910992.84  | 74665035.38  | 112610854.00 | 175315076.50 | 0.54 | 4643.39 | 7616.18  | 11209.67 | 17262.63 |
| 0.14 | 30693048.51  | 50038190.76  | 74471938.68  | 114377296.75 | 0.55 | 3982.45 | 6484.13  | 9506.20  | 14816.28 |
| 0.15 | 20791162.47  | 34200717.80  | 50525998.73  | 77823872.60  | 0.56 | 3413.01 | 5471.59  | 8156.38  | 12664.59 |
| 0.16 | 14539061.99  | 23781276.34  | 35707750.99  | 54913116.46  | 0.57 | 2912.84 | 4650.86  | 6975.25  | 10501.96 |
| 0.17 | 10300679.75  | 16871999.60  | 25321632.52  | 39658759.96  | 0.58 | 2488.16 | 3935.11  | 5760.71  | 8863.06  |
| 0.18 | 7366283.60   | 12074909.72  | 18195503.28  | 28675540.68  | 0.59 | 2112.04 | 3328.63  | 4894.49  | 7549.26  |
| 0.19 | 5406834.58   | 8876117.21   | 13336730.41  | 21055454.94  | 0.60 | 1798.36 | 2847.13  | 4121.93  | 6249.04  |
| 0.20 | 4011792.94   | 6531650.34   | 9897530.33   | 15568477.04  | 0.61 | 1529.50 | 2434.24  | 3488.36  | 5217.58  |
| 0.21 | 3030935.65   | 4974862.73   | 7427303.21   | 11581041.39  | 0.62 | 1292.38 | 2062.86  | 2971.33  | 4402.48  |
| 0.22 | 2291444.90   | 3792459.60   | 5709868.87   | 8900824.84   | 0.63 | 1104.28 | 1744.10  | 2528.17  | 3754.58  |
| 0.23 | 1764083.73   | 2916509.53   | 4381683.15   | 6793533.43   | 0.64 | 941.31  | 1478.30  | 2136.59  | 3172.81  |
| 0.24 | 1368731.04   | 2263045.53   | 3388782.90   | 5262830.53   | 0.65 | 791.25  | 1248.51  | 1806.21  | 2692.08  |
| 0.25 | 1078910.01   | 1757855.52   | 2641254.18   | 4127953.83   | 0.66 | 668.93  | 1061.58  | 1531.84  | 2287.59  |
| 0.26 | 836916.98    | 1368184.36   | 2070880.18   | 3186504.41   | 0.67 | 569.13  | 891.13   | 1297.73  | 1935.23  |
| 0.27 | 663952.84    | 1078515.03   | 1633621.23   | 2578043.76   | 0.68 | 479.51  | 751.71   | 1091.19  | 1660.34  |
| 0.28 | 526841.59    | 863609.37    | 1283049.28   | 2027672.30   | 0.69 | 403.93  | 635.70   | 928.05   | 1373.15  |
| 0.29 | 426143.62    | 696046.06    | 1034523.98   | 1605284.33   | 0.70 | 342.96  | 538.22   | 780.58   | 1160.15  |
| 0.30 | 342590.45    | 557326.89    | 840013.69    | 1299468.72   | 0.71 | 286.99  | 451.55   | 653.15   | 964.73   |
| 0.31 | 276396.92    | 451972.61    | 678579.90    | 1059174.86   | 0.72 | 241.09  | 377.67   | 547.34   | 795.79   |
| 0.32 | 224906.35    | 369899.12    | 550281.48    | 845754.83    | 0.73 | 203.75  | 316.19   | 455.65   | 673.12   |
| 0.33 | 183347.87    | 302627.91    | 448740.01    | 690528.02    | 0.74 | 171.02  | 264.59   | 378.80   | 564.35   |
| 0.34 | 151207.75    | 245842.02    | 365573.20    | 572068.99    | 0.75 | 142.61  | 221.32   | 318.65   | 465.24   |
| 0.35 | 123805.71    | 202175.92    | 301986.02    | 474543.39    | 0.76 | 118.50  | 184.40   | 261.99   | 390.88   |
| 0.36 | 101910.48    | 166354.22    | 251172.27    | 385606.69    | 0.77 | 98.05   | 151.00   | 217.49   | 319.05   |
| 0.37 | 84362.37     | 137153.53    | 206645.37    | 323699.83    | 0.78 | 81.30   | 124.44   | 177.52   | 259.67   |
| 0.38 | 70401.84     | 115037.76    | 171007.16    | 264654.89    | 0.79 | 66.79   | 102.17   | 144.91   | 212.35   |
| 0.39 | 58801.09     | 96669.36     | 143012.40    | 217745.48    | 0.80 | 55.16   | 83.47    | 117.00   | 171.57   |
| 0.40 | 49363.20     | 80277.06     | 120138.99    | 182509.93    | 0.81 | 44.89   | 67.66    | 95.36    | 139.14   |
| 0.41 | 41417.22     | 67490.14     | 101493.31    | 155030.59    | 0.82 | 36.46   | 55.05    | 77.34    | 110.46   |
| 0.42 | 34867.28     | 56530.20     | 85005.59     | 131016.20    | 0.83 | 29.60   | 44.32    | 62.11    | 88.79    |
| 0.43 | 29224.29     | 47395.86     | 70833.67     | 110008.23    | 0.84 | 23.81   | 35.64    | 49.36    | 71.55    |
| 0.44 | 24570.16     | 39858.49     | 59545.45     | 92959.33     | 0.85 | 18.93   | 28.39    | 39.23    | 56.49    |
| 0.45 | 20738.51     | 33791.42     | 50049.94     | 78301.39     | 0.86 | 14.99   | 22.29    | 30.83    | 44.25    |
| 0.46 | 17468.28     | 28555.87     | 42248.65     | 66232.44     | 0.87 | 11.77   | 17.43    | 23.97    | 34.07    |
| 0.47 | 14834.25     | 24221.52     | 35618.63     | 55715.80     | 0.88 | 9.16    | 13.49    | 18.38    | 25.83    |
| 0.48 | 12598.03     | 20499.16     | 30415.12     | 47183.50     | 0.89 | 7.05    | 10.32    | 13.85    | 19.50    |
| 0.49 | 10633.27     | 17288.20     | 25738.33     | 40425.91     | 0.90 | 5.33    | 7.75     | 10.52    | 14.57    |
| 0.50 | 8984.80      | 14523.02     | 21889.47     | 34118.57     |      |         |          |          |          |

Table S153: Critical values for detector  $\hat{H}_{sn}^m$  and IM-OLS estimation in a model with intercept and linear trend. The number of integrated regressors is 4 and the highest power of  $x_{kt}$  is 1.

| m    | 90 %        | 95 %         | 97,5 %       | 99 %         | m    | 90 %    | 95 %    | 97,5 %  | 99 %     |
|------|-------------|--------------|--------------|--------------|------|---------|---------|---------|----------|
| 0.10 | 40725682.38 | 103192193.02 | 225194855.33 | 543118738.24 | 0.51 | 1627.41 | 3266.55 | 6186.55 | 12684.87 |
| 0.11 | 24425598.05 | 61895779.88  | 133167399.93 | 320270057.69 | 0.52 | 1395.41 | 2792.35 | 5183.81 | 10822.39 |
| 0.12 | 15173042.77 | 37919628.84  | 82667878.79  | 201794251.29 | 0.53 | 1175.89 | 2359.56 | 4293.65 | 8870.78  |
| 0.13 | 10057321.00 | 25221944.25  | 53477256.65  | 127170598.28 | 0.54 | 1001.29 | 1985.92 | 3688.74 | 7498.72  |
| 0.14 | 6644690.85  | 16477806.75  | 35685011.60  | 83041036.37  | 0.55 | 849.96  | 1684.96 | 3059.03 | 6287.40  |
| 0.15 | 4559607.52  | 11179987.96  | 23787283.19  | 56819193.33  | 0.56 | 724.47  | 1431.43 | 2598.99 | 5223.50  |
| 0.16 | 3116509.91  | 7668999.04   | 16468978.57  | 38790418.14  | 0.57 | 625.58  | 1213.48 | 2154.46 | 4335.74  |
| 0.17 | 2243128.15  | 5422721.51   | 11493677.63  | 26622045.57  | 0.58 | 517.97  | 1014.26 | 1823.66 | 3763.06  |
| 0.18 | 1608630.94  | 3851762.02   | 8457126.45   | 19559898.27  | 0.59 | 438.75  | 860.10  | 1544.42 | 3156.84  |
| 0.19 | 1180553.17  | 2775454.10   | 5991815.88   | 14424482.19  | 0.60 | 374.42  | 723.08  | 1301.80 | 2633.72  |
| 0.20 | 868596.70   | 2045848.34   | 4436940.41   | 10324508.46  | 0.61 | 321.34  | 610.21  | 1102.58 | 2209.25  |
| 0.21 | 666930.73   | 1569063.78   | 3312477.03   | 7650098.05   | 0.62 | 272.11  | 516.29  | 921.09  | 1870.43  |
| 0.22 | 501595.29   | 1178838.39   | 2485819.49   | 5711950.47   | 0.63 | 232.81  | 439.84  | 760.01  | 1508.46  |
| 0.23 | 384230.92   | 907459.17    | 1901107.69   | 4407302.47   | 0.64 | 196.59  | 365.78  | 642.28  | 1266.08  |
| 0.24 | 296637.34   | 693362.35    | 1445253.73   | 3386145.29   | 0.65 | 167.50  | 309.89  | 551.04  | 1074.43  |
| 0.25 | 231179.66   | 531636.76    | 1125769.93   | 2583109.30   | 0.66 | 141.49  | 259.47  | 462.10  | 894.89   |
| 0.26 | 182660.05   | 417598.38    | 861446.70    | 2046564.90   | 0.67 | 118.68  | 218.33  | 381.74  | 752.01   |
| 0.27 | 142375.06   | 327082.19    | 681308.36    | 1582512.76   | 0.68 | 100.50  | 184.28  | 315.78  | 623.89   |
| 0.28 | 114135.42   | 258960.15    | 536932.16    | 1226379.34   | 0.69 | 84.84   | 155.99  | 266.30  | 511.12   |
| 0.29 | 91918.13    | 201817.27    | 426006.96    | 1002629.23   | 0.70 | 71.48   | 129.97  | 220.13  | 426.98   |
| 0.30 | 73735.30    | 165055.06    | 342720.36    | 795773.79    | 0.71 | 60.44   | 108.54  | 183.83  | 347.02   |
| 0.31 | 59625.48    | 132904.54    | 278640.55    | 644976.05    | 0.72 | 51.05   | 90.82   | 151.75  | 285.10   |
| 0.32 | 49093.73    | 108859.52    | 226680.98    | 527213.61    | 0.73 | 42.50   | 76.03   | 125.70  | 228.89   |
| 0.33 | 39834.66    | 88452.61     | 179487.03    | 415491.00    | 0.74 | 35.95   | 63.10   | 103.65  | 193.34   |
| 0.34 | 33074.84    | 72766.79     | 146334.15    | 336385.45    | 0.75 | 29.75   | 52.10   | 85.57   | 155.06   |
| 0.35 | 27209.68    | 59548.74     | 116850.51    | 273285.49    | 0.76 | 24.76   | 43.26   | 70.11   | 124.58   |
| 0.36 | 22569.72    | 49449.92     | 96641.60     | 219583.50    | 0.77 | 20.23   | 35.23   | 57.24   | 101.10   |
| 0.37 | 18480.76    | 40467.39     | 80269.00     | 182601.63    | 0.78 | 16.70   | 28.75   | 46.37   | 79.73    |
| 0.38 | 15229.45    | 33057.61     | 65931.88     | 149318.23    | 0.79 | 13.88   | 23.43   | 37.39   | 66.23    |
| 0.39 | 12680.82    | 27511.45     | 55037.87     | 120337.16    | 0.80 | 11.32   | 18.99   | 29.43   | 51.29    |
| 0.40 | 10718.89    | 22924.42     | 44977.31     | 97412.93     | 0.81 | 9.18    | 15.43   | 23.98   | 40.91    |
| 0.41 | 9019.72     | 18910.92     | 36932.15     | 81668.70     | 0.82 | 7.48    | 12.48   | 19.31   | 32.64    |
| 0.42 | 7510.72     | 15700.74     | 31126.98     | 66651.60     | 0.83 | 6.03    | 9.88    | 15.35   | 25.80    |
| 0.43 | 6318.07     | 13092.94     | 25429.87     | 54510.92     | 0.84 | 4.79    | 7.89    | 12.11   | 20.12    |
| 0.44 | 5286.75     | 10988.88     | 21471.11     | 46506.71     | 0.85 | 3.82    | 6.18    | 9.43    | 15.53    |
| 0.45 | 4479.00     | 9413.87      | 17880.60     | 38526.70     | 0.86 | 3.00    | 4.83    | 7.30    | 11.78    |
| 0.46 | 3743.29     | 7812.61      | 15022.70     | 32814.98     | 0.87 | 2.33    | 3.71    | 5.56    | 8.97     |
| 0.47 | 3140.27     | 6612.02      | 12361.82     | 26515.66     | 0.88 | 1.79    | 2.83    | 4.21    | 6.67     |
| 0.48 | 2659.50     | 5525.67      | 10396.29     | 22105.82     | 0.89 | 1.35    | 2.11    | 3.12    | 4.92     |
| 0.49 | 2270.75     | 4747.26      | 8949.56      | 18701.04     | 0.90 | 1.01    | 1.58    | 2.30    | 3.55     |
| 0.50 | 1926.96     | 3906.33      | 7326.98      | 15652.99     |      |         |         |         |          |

Table S154: Critical values for detector  $\hat{H}_{sn}^m$  and FM-OLS and D-OLS estimation in a model with intercept. The number of integrated regressors is 4 and the highest power of  $x_{kt}$  is 2.

| m    | 90 %         | 95 %         | 97,5 %        | 99 %          | m    | 90 %    | 95 %     | 97,5 %   | 99 %     |
|------|--------------|--------------|---------------|---------------|------|---------|----------|----------|----------|
| 0.10 | 241202410.66 | 627879704.48 | 1425398517.84 | 3465675049.41 | 0.51 | 8912.52 | 18411.21 | 36617.70 | 81215.01 |
| 0.11 | 146654016.16 | 375205619.17 | 840789568.27  | 2149685409.14 | 0.52 | 7531.04 | 15687.16 | 30779.06 | 68414.56 |
| 0.12 | 90088056.79  | 233190091.80 | 527765127.43  | 1309070996.58 | 0.53 | 6400.96 | 13193.91 | 25580.76 | 56198.29 |
| 0.13 | 58339308.25  | 150598194.48 | 339503208.95  | 831521420.38  | 0.54 | 5389.32 | 11111.10 | 21262.67 | 46032.92 |
| 0.14 | 39220324.46  | 98621018.95  | 220379865.31  | 556598680.04  | 0.55 | 4560.43 | 9472.07  | 18025.66 | 38689.63 |
| 0.15 | 26604103.87  | 67539489.39  | 149095800.80  | 380428395.36  | 0.56 | 3888.54 | 7870.48  | 15112.01 | 32272.33 |
| 0.16 | 18687373.56  | 46759288.14  | 102944293.08  | 256530411.96  | 0.57 | 3274.83 | 6696.53  | 12572.97 | 27475.31 |
| 0.17 | 13001246.58  | 32566109.22  | 71808502.50   | 174748284.66  | 0.58 | 2795.64 | 5616.05  | 10559.12 | 22529.87 |
| 0.18 | 9181141.15   | 23103638.05  | 50441727.03   | 123578367.75  | 0.59 | 2387.70 | 4782.83  | 8934.31  | 18983.73 |
| 0.19 | 6795278.87   | 16485173.16  | 35382806.07   | 87370841.22   | 0.60 | 2040.58 | 4045.82  | 7578.01  | 15875.01 |
| 0.20 | 5020130.68   | 12188872.40  | 25758118.40   | 64174385.81   | 0.61 | 1741.62 | 3400.32  | 6318.14  | 13504.78 |
| 0.21 | 3780351.98   | 9139570.71   | 19446258.45   | 47850751.76   | 0.62 | 1476.71 | 2861.96  | 5305.37  | 11328.72 |
| 0.22 | 2847206.13   | 6831643.08   | 14732089.42   | 34604253.11   | 0.63 | 1251.83 | 2427.60  | 4470.75  | 9448.84  |
| 0.23 | 2166917.57   | 5288554.95   | 11421690.98   | 26239405.36   | 0.64 | 1066.31 | 2069.27  | 3695.45  | 7669.74  |
| 0.24 | 1708377.74   | 4088363.58   | 8853023.71    | 20402301.58   | 0.65 | 899.08  | 1722.48  | 3118.38  | 6412.97  |
| 0.25 | 1343855.49   | 3254849.44   | 6970300.55    | 16275156.60   | 0.66 | 758.54  | 1443.44  | 2602.37  | 5185.16  |
| 0.26 | 1044488.02   | 2523944.84   | 5513548.88    | 12574709.09   | 0.67 | 640.99  | 1201.03  | 2136.31  | 4323.66  |
| 0.27 | 830164.34    | 1971169.14   | 4217979.17    | 10023133.10   | 0.68 | 536.76  | 1003.13  | 1791.75  | 3635.88  |
| 0.28 | 649134.20    | 1540003.69   | 3308154.51    | 7651880.88    | 0.69 | 453.65  | 841.81   | 1509.03  | 3050.33  |
| 0.29 | 524560.29    | 1231072.51   | 2607600.32    | 5968946.29    | 0.70 | 381.69  | 706.65   | 1274.21  | 2511.03  |
| 0.30 | 415722.62    | 977237.50    | 2058875.40    | 4878762.89    | 0.71 | 320.52  | 591.30   | 1049.45  | 2046.91  |
| 0.31 | 337219.23    | 786443.57    | 1671954.36    | 3865446.97    | 0.72 | 268.59  | 495.61   | 865.49   | 1715.19  |
| 0.32 | 275246.43    | 629565.21    | 1341641.25    | 3123504.46    | 0.73 | 224.12  | 411.41   | 708.40   | 1389.41  |
| 0.33 | 222359.44    | 517762.18    | 1093436.61    | 2548596.35    | 0.74 | 187.19  | 340.61   | 582.86   | 1141.47  |
| 0.34 | 181364.66    | 416300.99    | 894125.89     | 2122210.92    | 0.75 | 155.56  | 281.75   | 475.07   | 926.64   |
| 0.35 | 150360.59    | 342540.28    | 741630.56     | 1734802.05    | 0.76 | 128.55  | 229.88   | 386.59   | 753.74   |
| 0.36 | 124308.73    | 283961.81    | 605649.78     | 1417153.25    | 0.77 | 105.96  | 187.36   | 315.36   | 587.30   |
| 0.37 | 102839.79    | 232133.34    | 487472.48     | 1150993.26    | 0.78 | 86.90   | 151.58   | 253.13   | 469.02   |
| 0.38 | 85593.41     | 191029.29    | 399852.00     | 939889.87     | 0.79 | 71.12   | 123.53   | 201.19   | 374.10   |
| 0.39 | 70883.93     | 156598.17    | 323298.95     | 778548.45     | 0.80 | 58.11   | 99.55    | 160.96   | 296.79   |
| 0.40 | 59356.25     | 132184.80    | 269108.71     | 611054.09     | 0.81 | 47.35   | 80.41    | 129.65   | 237.25   |
| 0.41 | 49903.35     | 108969.70    | 220062.58     | 489985.24     | 0.82 | 38.25   | 64.92    | 102.93   | 186.75   |
| 0.42 | 41638.16     | 89929.72     | 179588.05     | 403169.86     | 0.83 | 30.81   | 52.00    | 81.52    | 142.73   |
| 0.43 | 33935.03     | 75404.85     | 148847.27     | 338046.05     | 0.84 | 24.96   | 41.14    | 63.24    | 109.69   |
| 0.44 | 28425.65     | 62171.68     | 123592.89     | 287009.63     | 0.85 | 19.93   | 32.35    | 49.09    | 83.23    |
| 0.45 | 23869.47     | 52022.01     | 102404.48     | 239341.32     | 0.86 | 15.72   | 25.21    | 37.99    | 63.97    |
| 0.46 | 20306.63     | 44102.51     | 87253.15      | 195649.37     | 0.87 | 12.27   | 19.45    | 29.16    | 48.36    |
| 0.47 | 17280.96     | 37110.87     | 73481.05      | 162046.00     | 0.88 | 9.48    | 14.94    | 22.14    | 35.84    |
| 0.48 | 14565.27     | 31434.43     | 61953.36      | 135809.72     | 0.89 | 7.30    | 11.26    | 16.34    | 26.54    |
| 0.49 | 12472.46     | 26434.48     | 51516.99      | 115147.09     | 0.90 | 5.47    | 8.40     | 12.20    | 19.34    |
| 0.50 | 10551.49     | 22416.34     | 43550.28      | 95141.03      |      |         |          |          |          |

Table S155: Critical values for detector  $\hat{H}_{sn}^m$  and IM-OLS estimation in a model with intercept. The number of integrated regressors is 4 and the highest power of  $x_{kt}$  is 2.

| m    | 90 %         | 95 %         | 97,5 %       | 99 %          | m    | 90 %    | 95 %    | 97,5 %   | 99 %     |
|------|--------------|--------------|--------------|---------------|------|---------|---------|----------|----------|
| 0.10 | 143352331.62 | 270939944.26 | 486953845.79 | 1034083919.51 | 0.51 | 3817.83 | 6790.91 | 11266.12 | 20967.26 |
| 0.11 | 84976342.72  | 161062101.43 | 284070473.75 | 581569644.37  | 0.52 | 3229.42 | 5694.99 | 9378.55  | 17884.67 |
| 0.12 | 51498767.30  | 97893747.92  | 175922503.29 | 361863702.98  | 0.53 | 2712.74 | 4747.88 | 7900.06  | 14765.76 |
| 0.13 | 32922925.42  | 62106842.92  | 111762879.09 | 226301285.35  | 0.54 | 2304.42 | 4056.55 | 6635.06  | 12065.30 |
| 0.14 | 21552996.62  | 40667280.63  | 71769010.99  | 147195153.68  | 0.55 | 1945.54 | 3444.95 | 5566.22  | 10179.33 |
| 0.15 | 14521051.44  | 27418420.83  | 48738949.00  | 100254676.16  | 0.56 | 1655.27 | 2877.41 | 4723.95  | 8650.07  |
| 0.16 | 9955404.38   | 18915860.12  | 33485653.22  | 68608326.06   | 0.57 | 1391.04 | 2413.75 | 3912.17  | 7169.49  |
| 0.17 | 6958139.08   | 13064811.28  | 23344452.39  | 46746644.95   | 0.58 | 1169.99 | 2031.99 | 3393.44  | 6103.88  |
| 0.18 | 4964563.68   | 9418867.48   | 16690746.56  | 33377498.41   | 0.59 | 984.39  | 1742.92 | 2794.36  | 5090.08  |
| 0.19 | 3624635.61   | 6736137.30   | 11859147.32  | 24369284.22   | 0.60 | 833.14  | 1454.66 | 2377.80  | 4236.83  |
| 0.20 | 2655152.68   | 4931003.06   | 8810458.32   | 17840703.15   | 0.61 | 699.62  | 1225.86 | 1999.90  | 3607.11  |
| 0.21 | 1992047.25   | 3717193.67   | 6583135.57   | 12982649.62   | 0.62 | 590.48  | 1040.78 | 1680.76  | 3027.56  |
| 0.22 | 1474023.90   | 2783021.57   | 4843031.97   | 9869834.95    | 0.63 | 501.26  | 862.90  | 1378.66  | 2490.88  |
| 0.23 | 1128982.17   | 2111158.07   | 3676764.46   | 7406646.51    | 0.64 | 416.22  | 726.34  | 1150.45  | 2044.85  |
| 0.24 | 865854.00    | 1588153.05   | 2798397.51   | 5656999.36    | 0.65 | 349.12  | 602.33  | 970.36   | 1730.55  |
| 0.25 | 669364.82    | 1226164.47   | 2168690.73   | 4352520.17    | 0.66 | 297.15  | 507.19  | 817.96   | 1466.44  |
| 0.26 | 515551.71    | 945455.99    | 1655687.84   | 3376972.38    | 0.67 | 247.74  | 425.46  | 685.95   | 1203.76  |
| 0.27 | 400520.39    | 742337.12    | 1302406.95   | 2617181.91    | 0.68 | 207.94  | 357.08  | 567.16   | 1024.82  |
| 0.28 | 318928.87    | 587023.28    | 1008447.65   | 2048967.18    | 0.69 | 174.57  | 298.83  | 471.79   | 825.42   |
| 0.29 | 253418.51    | 465784.44    | 815421.72    | 1629428.97    | 0.70 | 145.76  | 246.95  | 394.98   | 689.59   |
| 0.30 | 202160.76    | 372609.89    | 654698.13    | 1312641.97    | 0.71 | 121.16  | 204.28  | 325.79   | 569.40   |
| 0.31 | 161840.63    | 301478.75    | 520696.76    | 1040769.87    | 0.72 | 100.95  | 170.23  | 268.98   | 455.64   |
| 0.32 | 131088.19    | 243648.74    | 422161.40    | 849975.94     | 0.73 | 84.61   | 140.60  | 219.96   | 372.91   |
| 0.33 | 106620.65    | 197376.88    | 342939.97    | 674857.85     | 0.74 | 70.46   | 116.81  | 180.23   | 306.61   |
| 0.34 | 86704.07     | 161031.03    | 278259.85    | 550797.12     | 0.75 | 57.76   | 95.38   | 146.79   | 248.60   |
| 0.35 | 70954.93     | 129278.77    | 224271.30    | 443962.08     | 0.76 | 47.60   | 78.61   | 120.37   | 201.63   |
| 0.36 | 57955.31     | 104344.43    | 182211.99    | 365164.28     | 0.77 | 38.60   | 63.32   | 96.61    | 163.01   |
| 0.37 | 47541.45     | 86436.57     | 150233.74    | 291932.02     | 0.78 | 31.61   | 51.32   | 78.51    | 129.13   |
| 0.38 | 39207.03     | 71504.68     | 122326.21    | 241828.01     | 0.79 | 25.89   | 42.30   | 64.46    | 106.68   |
| 0.39 | 32788.82     | 58581.91     | 99714.50     | 198573.14     | 0.80 | 20.74   | 33.44   | 50.58    | 82.81    |
| 0.40 | 26938.09     | 47901.61     | 81547.21     | 160333.23     | 0.81 | 16.62   | 26.90   | 40.77    | 66.01    |
| 0.41 | 22492.66     | 39792.69     | 67375.12     | 132376.56     | 0.82 | 13.43   | 21.73   | 32.50    | 52.85    |
| 0.42 | 18601.51     | 33286.44     | 55532.15     | 106358.29     | 0.83 | 10.61   | 17.13   | 25.90    | 40.95    |
| 0.43 | 15493.26     | 27670.64     | 46458.38     | 88498.02      | 0.84 | 8.42    | 13.46   | 19.87    | 31.59    |
| 0.44 | 12872.69     | 23198.44     | 38954.97     | 75179.63      | 0.85 | 6.54    | 10.47   | 15.39    | 24.17    |
| 0.45 | 10879.82     | 19478.38     | 32816.63     | 61723.21      | 0.86 | 5.12    | 8.03    | 11.71    | 18.23    |
| 0.46 | 9069.48      | 16346.92     | 27803.52     | 52968.44      | 0.87 | 3.90    | 6.11    | 8.90     | 13.80    |
| 0.47 | 7612.74      | 13757.87     | 23158.21     | 44090.57      | 0.88 | 2.94    | 4.57    | 6.66     | 10.16    |
| 0.48 | 6405.83      | 11468.87     | 19356.29     | 36363.13      | 0.89 | 2.20    | 3.39    | 4.85     | 7.54     |
| 0.49 | 5434.11      | 9652.27      | 15978.01     | 30310.72      | 0.90 | 1.61    | 2.49    | 3.56     | 5.35     |
| 0.50 | 4554.57      | 8074.78      | 13511.28     | 24869.93      |      |         |         |          |          |

Table S156: Critical values for detector  $\hat{H}_{sn}^m$  and FM-OLS and D-OLS estimation in a model with intercept and linear trend. The number of integrated regressors is 4 and the highest power of  $x_{kt}$  is 2.

| m    | 90 %         | 95 %          | 97,5 %        | 99 %          | m    | 90 %     | 95 %     | 97,5 %   | 99 %      |
|------|--------------|---------------|---------------|---------------|------|----------|----------|----------|-----------|
| 0.10 | 637808424.96 | 1270050152.80 | 2381468638.89 | 5273116774.11 | 0.51 | 16539.11 | 30008.12 | 51335.46 | 101477.09 |
| 0.11 | 380794196.17 | 738854768.48  | 1376062455.02 | 3106328899.94 | 0.52 | 13821.45 | 25307.98 | 43485.69 | 85707.19  |
| 0.12 | 228688188.90 | 454448665.49  | 859778482.16  | 1889429766.55 | 0.53 | 11678.34 | 21256.66 | 36031.72 | 71076.80  |
| 0.13 | 145684144.32 | 286641327.65  | 530548359.50  | 1173132276.97 | 0.54 | 9880.90  | 17683.34 | 30076.06 | 59393.48  |
| 0.14 | 94934478.77  | 184911182.73  | 352859598.07  | 748684639.33  | 0.55 | 8324.29  | 15050.62 | 25156.76 | 49005.77  |
| 0.15 | 64120121.96  | 126089167.38  | 233709292.50  | 504632189.81  | 0.56 | 7061.03  | 12618.34 | 21198.10 | 41315.31  |
| 0.16 | 43829934.37  | 85849898.26   | 159479287.44  | 344352760.88  | 0.57 | 5969.87  | 10585.52 | 17867.58 | 34721.44  |
| 0.17 | 30723811.28  | 59832329.33   | 109402599.06  | 237294322.23  | 0.58 | 4962.80  | 8921.73  | 15074.46 | 29393.44  |
| 0.18 | 21549958.32  | 42523200.40   | 76354328.16   | 167782468.97  | 0.59 | 4207.46  | 7429.56  | 12710.09 | 24171.67  |
| 0.19 | 15564148.71  | 30071479.00   | 55254607.40   | 119230707.20  | 0.60 | 3525.60  | 6344.77  | 10634.82 | 20031.93  |
| 0.20 | 11398489.88  | 21884111.34   | 40273737.68   | 84552667.58   | 0.61 | 2966.69  | 5262.28  | 8847.27  | 17058.60  |
| 0.21 | 8472879.11   | 16265016.53   | 29460178.36   | 62502039.74   | 0.62 | 2510.13  | 4387.06  | 7358.42  | 14370.95  |
| 0.22 | 6402887.82   | 12260923.39   | 21961623.78   | 45694604.65   | 0.63 | 2138.64  | 3689.45  | 6211.04  | 11872.10  |
| 0.23 | 4861304.08   | 9332415.72    | 16608373.83   | 34165626.02   | 0.64 | 1802.09  | 3092.79  | 5136.45  | 9845.67   |
| 0.24 | 3775189.89   | 7163724.75    | 12907655.67   | 26807522.50   | 0.65 | 1511.29  | 2621.60  | 4275.87  | 7969.34   |
| 0.25 | 2906558.02   | 5534946.27    | 10018719.92   | 20796951.42   | 0.66 | 1263.34  | 2206.96  | 3542.84  | 6489.12   |
| 0.26 | 2255824.60   | 4298061.29    | 7767294.33    | 16259378.22   | 0.67 | 1064.70  | 1817.58  | 2945.95  | 5436.07   |
| 0.27 | 1764153.36   | 3347849.27    | 5997868.10    | 12560580.78   | 0.68 | 891.97   | 1531.65  | 2452.48  | 4532.74   |
| 0.28 | 1390762.02   | 2600802.08    | 4728109.25    | 10082376.26   | 0.69 | 745.70   | 1278.17  | 2032.09  | 3784.40   |
| 0.29 | 1107795.85   | 2054650.32    | 3791216.33    | 7883120.34    | 0.70 | 624.27   | 1068.03  | 1708.01  | 3111.23   |
| 0.30 | 883192.70    | 1644294.14    | 3038751.63    | 6338285.32    | 0.71 | 519.02   | 891.91   | 1435.23  | 2551.47   |
| 0.31 | 706068.15    | 1338362.32    | 2433804.57    | 5059160.81    | 0.72 | 432.85   | 736.12   | 1175.23  | 2116.87   |
| 0.32 | 568076.14    | 1078409.58    | 1948231.55    | 4091121.35    | 0.73 | 357.25   | 611.84   | 973.06   | 1721.42   |
| 0.33 | 459216.58    | 867842.05     | 1566859.08    | 3340946.22    | 0.74 | 296.08   | 505.39   | 799.07   | 1404.83   |
| 0.34 | 374583.66    | 704821.96     | 1283922.80    | 2673903.67    | 0.75 | 246.50   | 412.54   | 650.76   | 1150.58   |
| 0.35 | 306710.66    | 581532.04     | 1054005.89    | 2173327.03    | 0.76 | 202.53   | 338.45   | 532.61   | 931.02    |
| 0.36 | 249950.79    | 475494.01     | 860791.92     | 1742652.88    | 0.77 | 165.07   | 277.06   | 432.54   | 750.00    |
| 0.37 | 205101.87    | 388315.91     | 699631.78     | 1436303.61    | 0.78 | 133.95   | 223.76   | 346.85   | 601.84    |
| 0.38 | 169307.16    | 315173.73     | 569477.68     | 1175320.43    | 0.79 | 109.37   | 180.45   | 278.43   | 480.01    |
| 0.39 | 138638.58    | 258701.27     | 459368.27     | 964362.13     | 0.80 | 88.66    | 144.99   | 224.45   | 382.96    |
| 0.40 | 115218.86    | 212436.14     | 378943.61     | 781876.93     | 0.81 | 71.45    | 116.72   | 177.99   | 303.46    |
| 0.41 | 96191.87     | 176222.11     | 311113.07     | 648789.91     | 0.82 | 57.63    | 93.23    | 141.02   | 236.52    |
| 0.42 | 80196.21     | 147671.40     | 257365.20     | 527248.39     | 0.83 | 45.66    | 73.82    | 110.62   | 184.04    |
| 0.43 | 66899.36     | 122054.52     | 215703.10     | 429825.32     | 0.84 | 36.18    | 57.66    | 85.94    | 139.56    |
| 0.44 | 55576.70     | 100894.71     | 178186.31     | 365269.88     | 0.85 | 28.43    | 44.97    | 66.31    | 106.81    |
| 0.45 | 46758.99     | 84747.98      | 148936.37     | 307941.87     | 0.86 | 22.01    | 34.36    | 51.12    | 81.66     |
| 0.46 | 39328.22     | 72142.89      | 125580.50     | 250868.46     | 0.87 | 17.02    | 26.44    | 38.75    | 61.96     |
| 0.47 | 33240.62     | 60701.64      | 104890.00     | 208402.48     | 0.88 | 13.06    | 20.00    | 28.86    | 45.70     |
| 0.48 | 27876.69     | 51047.44      | 87429.61      | 174959.58     | 0.89 | 9.78     | 14.83    | 21.40    | 32.75     |
| 0.49 | 23507.98     | 42543.76      | 71889.11      | 144674.97     | 0.90 | 7.23     | 11.00    | 15.66    | 23.86     |
| 0.50 | 19714.82     | 35675.94      | 60854.06      | 120635.17     |      |          |          |          |           |

Table S157: Critical values for detector  $\hat{H}_{sn}^m$  and IM-OLS estimation in a model with intercept and linear trend. The number of integrated regressors is 4 and the highest power of  $x_{kt}$  is 2.

| m    | 90 %          | 95 %           | 97,5 %         | 99 %            | m    | 90 %     | 95 %     | 97,5 %    | 99 %      |
|------|---------------|----------------|----------------|-----------------|------|----------|----------|-----------|-----------|
| 0.10 | 373588049.40  | 13690286387.29 | 41143777325.12 | 133091929289.56 | 0.51 | 11486.87 | 38308.98 | 107926.80 | 318245.94 |
| 0.11 | 2012525142.70 | 7437375845.02  | 21603134155.60 | 70155736065.71  | 0.52 | 9300.04  | 30806.56 | 85108.47  | 252948.21 |
| 0.12 | 1131628647.22 | 4222084980.51  | 12195710451.91 | 40669457354.18  | 0.53 | 7658.02  | 25265.32 | 70326.29  | 214047.41 |
| 0.13 | 670347223.51  | 2430754545.98  | 7159953844.65  | 22872253537.41  | 0.54 | 6149.61  | 20655.98 | 55990.72  | 169334.57 |
| 0.14 | 404719801.41  | 1472276610.76  | 4406756540.20  | 14224651394.41  | 0.55 | 4906.44  | 16557.72 | 43850.78  | 138703.60 |
| 0.15 | 250427125.92  | 910204511.77   | 2734208749.83  | 8953731703.50   | 0.56 | 3986.44  | 13455.03 | 35266.71  | 107651.13 |
| 0.16 | 160921731.95  | 569927554.41   | 1713241593.19  | 5809067895.32   | 0.57 | 3235.73  | 10367.90 | 27954.59  | 84836.01  |
| 0.17 | 104871669.86  | 381417373.49   | 1110102089.73  | 3747910624.52   | 0.58 | 2618.56  | 8421.50  | 22184.74  | 68541.04  |
| 0.18 | 68892286.04   | 249125296.36   | 705449374.19   | 2353779113.84   | 0.59 | 2123.50  | 6796.01  | 18057.90  | 54330.70  |
| 0.19 | 47868762.77   | 172354591.36   | 482643649.57   | 1632656782.53   | 0.60 | 1718.96  | 5459.64  | 14367.02  | 44594.09  |
| 0.20 | 32989231.52   | 119147843.13   | 342113240.25   | 1098591572.00   | 0.61 | 1399.24  | 4399.50  | 11511.46  | 36312.26  |
| 0.21 | 23489999.13   | 85601962.36    | 241145549.81   | 785953975.00    | 0.62 | 1125.56  | 3552.27  | 9303.24   | 29253.76  |
| 0.22 | 17069184.20   | 61750304.81    | 175181504.30   | 551144370.64    | 0.63 | 922.73   | 2878.75  | 7569.96   | 22270.53  |
| 0.23 | 12252297.51   | 44939703.40    | 126874274.06   | 392376403.26    | 0.64 | 751.37   | 2325.01  | 6075.87   | 17691.67  |
| 0.24 | 9022155.99    | 32207835.26    | 92792755.37    | 286200872.52    | 0.65 | 618.63   | 1852.57  | 4790.49   | 14028.10  |
| 0.25 | 6635786.94    | 23285670.95    | 67849566.59    | 210116331.32    | 0.66 | 501.64   | 1505.88  | 3911.63   | 11606.43  |
| 0.26 | 4765415.97    | 17223583.66    | 49793789.91    | 154852264.69    | 0.67 | 400.32   | 1181.47  | 3140.09   | 8893.81   |
| 0.27 | 3503765.12    | 12614848.98    | 37517175.42    | 110309180.87    | 0.68 | 320.22   | 949.46   | 2517.92   | 7233.08   |
| 0.28 | 2656313.24    | 9603215.57     | 27347259.44    | 84659239.52     | 0.69 | 261.50   | 762.06   | 1945.58   | 5554.83   |
| 0.29 | 1988706.70    | 7284286.22     | 20622998.08    | 67260110.42     | 0.70 | 209.50   | 601.26   | 1502.33   | 4409.89   |
| 0.30 | 1509284.43    | 5472969.75     | 14975489.21    | 49832315.91     | 0.71 | 170.40   | 477.65   | 1206.18   | 3520.47   |
| 0.31 | 1152874.01    | 4209685.90     | 11954747.27    | 37611282.17     | 0.72 | 136.89   | 374.07   | 957.80    | 2758.91   |
| 0.32 | 874463.04     | 3231886.91     | 9206018.77     | 29323698.06     | 0.73 | 110.23   | 299.80   | 749.17    | 2140.19   |
| 0.33 | 676110.69     | 2484386.11     | 7116328.65     | 22355708.29     | 0.74 | 87.94    | 233.86   | 592.05    | 1660.41   |
| 0.34 | 534645.28     | 1883802.48     | 5503444.91     | 17191037.71     | 0.75 | 70.25    | 181.95   | 457.63    | 1298.16   |
| 0.35 | 411208.80     | 1484171.00     | 4227192.70     | 13720411.52     | 0.76 | 56.56    | 144.38   | 354.56    | 973.68    |
| 0.36 | 322760.70     | 1156763.05     | 3362474.94     | 10669251.50     | 0.77 | 44.54    | 112.40   | 271.75    | 742.29    |
| 0.37 | 251940.36     | 901683.45      | 2698354.15     | 8264097.02      | 0.78 | 35.58    | 85.77    | 201.61    | 550.27    |
| 0.38 | 203358.64     | 699951.22      | 2052928.82     | 6323334.59      | 0.79 | 28.38    | 66.42    | 153.54    | 419.36    |
| 0.39 | 161064.74     | 564084.08      | 1595537.40     | 5006206.35      | 0.80 | 22.22    | 51.83    | 116.88    | 314.34    |
| 0.40 | 125188.36     | 443343.04      | 1278823.47     | 3988360.21      | 0.81 | 17.73    | 40.02    | 89.63     | 235.60    |
| 0.41 | 99970.80      | 355115.75      | 992953.96      | 3209226.64      | 0.82 | 13.92    | 30.88    | 66.98     | 171.21    |
| 0.42 | 79406.67      | 273172.81      | 774520.78      | 2496937.54      | 0.83 | 10.78    | 22.78    | 50.98     | 127.05    |
| 0.43 | 62333.94      | 222916.17      | 634789.09      | 1939606.06      | 0.84 | 8.34     | 17.22    | 36.27     | 93.48     |
| 0.44 | 49415.04      | 173702.37      | 502740.39      | 1545105.24      | 0.85 | 6.31     | 12.98    | 26.98     | 64.65     |
| 0.45 | 40374.73      | 139775.72      | 399513.65      | 1220634.65      | 0.86 | 4.81     | 9.64     | 19.09     | 44.52     |
| 0.46 | 32516.77      | 114337.65      | 322484.92      | 1000828.59      | 0.87 | 3.65     | 6.99     | 13.43     | 33.14     |
| 0.47 | 26515.18      | 91210.79       | 258314.58      | 816311.12       | 0.88 | 2.68     | 5.02     | 9.42      | 21.44     |
| 0.48 | 21492.23      | 73465.61       | 204278.92      | 635655.82       | 0.89 | 1.98     | 3.60     | 6.47      | 14.12     |
| 0.49 | 17584.52      | 59242.83       | 166053.23      | 491665.92       | 0.90 | 1.44     | 2.56     | 4.41      | 9.36      |
| 0.50 | 14147.27      | 46500.13       | 132423.43      | 391401.40       |      |          |          |           |           |

Table S158: Critical values for detector  $\hat{H}_{sn}^m$  and FM-OLS and D-OLS estimation in a model with intercept. The number of integrated regressors is 4 and the highest power of  $x_{kt}$  is 3.

| m    | 90 %           | 95 %            | 97.5 %          | 99 %             | m    | 90 %     | 95 %      | 97.5 %    | 99 %       |
|------|----------------|-----------------|-----------------|------------------|------|----------|-----------|-----------|------------|
| 0.10 | 32540222371.75 | 126247230743.55 | 386378226143.51 | 1398175220957.89 | 0.51 | 93786.80 | 328536.34 | 968610.95 | 3096160.70 |
| 0.11 | 17259899224.64 | 65167258857.31  | 202650688928.23 | 720756677227.80  | 0.52 | 76478.10 | 267086.11 | 779823.19 | 2477354.67 |
| 0.12 | 9801369206.98  | 37977098302.58  | 113717608812.63 | 394416084548.35  | 0.53 | 61428.17 | 214866.87 | 616510.03 | 1952048.62 |
| 0.13 | 5686517531.84  | 21807152490.52  | 68113057544.76  | 259455468271.10  | 0.54 | 49447.88 | 173056.88 | 490081.83 | 1587515.04 |
| 0.14 | 3498603027.55  | 13808131034.47  | 42596844928.76  | 148205768736.09  | 0.55 | 40388.00 | 139967.46 | 391874.93 | 1241646.94 |
| 0.15 | 2152432034.33  | 8399952181.84   | 26770496642.82  | 91853393530.27   | 0.56 | 32322.18 | 112144.90 | 324516.41 | 1035568.72 |
| 0.16 | 1400280675.62  | 5320664642.25   | 17274940785.43  | 57409745706.18   | 0.57 | 26021.77 | 91071.60  | 261631.68 | 836316.08  |
| 0.17 | 930125762.47   | 3535411302.70   | 11279241592.71  | 38587867750.59   | 0.58 | 20820.14 | 73502.06  | 207583.26 | 666758.42  |
| 0.18 | 609148529.11   | 2355432871.43   | 7312149806.33   | 25002147392.53   | 0.59 | 16929.89 | 59656.21  | 168698.90 | 533742.57  |
| 0.19 | 407978322.68   | 1566492175.33   | 4949567502.39   | 16577648969.06   | 0.60 | 13588.28 | 48295.24  | 138302.04 | 429896.02  |
| 0.20 | 284359115.16   | 1097049733.66   | 3382446884.60   | 11879250038.29   | 0.61 | 10951.57 | 38820.09  | 112291.61 | 346448.35  |
| 0.21 | 196307419.46   | 769558454.69    | 2414741498.44   | 8420720173.04    | 0.62 | 8862.11  | 31091.88  | 89162.85  | 275381.31  |
| 0.22 | 141348064.21   | 530971633.02    | 1638055953.50   | 5773070710.26    | 0.63 | 7228.62  | 24497.01  | 69779.94  | 219794.53  |
| 0.23 | 101216876.09   | 381322788.46    | 1151818849.95   | 4142454049.60    | 0.64 | 5870.30  | 19848.47  | 56031.53  | 175959.92  |
| 0.24 | 73244598.74    | 275881454.82    | 843043266.27    | 3014574758.15    | 0.65 | 4723.73  | 15765.08  | 44369.71  | 143861.36  |
| 0.25 | 51956918.20    | 196862402.72    | 612358101.90    | 2178027354.69    | 0.66 | 3797.73  | 12650.47  | 35823.18  | 114743.78  |
| 0.26 | 38059289.99    | 144790154.81    | 432338975.94    | 1509649819.36    | 0.67 | 3079.73  | 10298.55  | 27840.15  | 89377.19   |
| 0.27 | 28819474.75    | 111377496.45    | 319200403.62    | 1128970148.83    | 0.68 | 2422.18  | 8148.11   | 22357.41  | 70337.77   |
| 0.28 | 22187433.40    | 83105982.11     | 249583472.60    | 869139241.82     | 0.69 | 1971.61  | 6415.43   | 17875.82  | 54531.17   |
| 0.29 | 16914165.96    | 63913463.94     | 192723800.43    | 653708886.82     | 0.70 | 1610.45  | 5142.22   | 13943.15  | 41819.25   |
| 0.30 | 12644652.78    | 47722517.62     | 144235640.77    | 488602343.60     | 0.71 | 1283.08  | 3992.79   | 10772.26  | 33340.54   |
| 0.31 | 9579715.71     | 35865413.37     | 109104489.85    | 361024076.88     | 0.72 | 1002.56  | 3166.35   | 8383.68   | 26004.93   |
| 0.32 | 7510473.01     | 27871852.85     | 86343657.63     | 274682579.64     | 0.73 | 794.00   | 2540.61   | 6638.30   | 20088.08   |
| 0.33 | 5848857.62     | 21626128.70     | 66497411.63     | 217957439.99     | 0.74 | 622.05   | 1960.34   | 5193.50   | 15603.10   |
| 0.34 | 4438873.82     | 17029751.10     | 52443336.25     | 170085563.48     | 0.75 | 495.18   | 1523.85   | 4096.09   | 11994.62   |
| 0.35 | 3439468.08     | 13031321.15     | 39075256.89     | 131275866.47     | 0.76 | 389.74   | 1170.17   | 3102.22   | 9109.39    |
| 0.36 | 2676476.41     | 10346159.08     | 31083697.06     | 102612920.96     | 0.77 | 307.07   | 895.04    | 2332.23   | 6813.84    |
| 0.37 | 2087388.68     | 8102793.50      | 23688584.86     | 82028585.15      | 0.78 | 240.98   | 685.47    | 1769.81   | 5204.64    |
| 0.38 | 1667187.48     | 6320811.58      | 18258830.69     | 63911758.23      | 0.79 | 189.43   | 529.62    | 1325.38   | 3947.80    |
| 0.39 | 1304179.04     | 4906937.88      | 14472938.24     | 50958970.78      | 0.80 | 146.39   | 399.67    | 1020.02   | 2883.60    |
| 0.40 | 1041659.38     | 3862440.75      | 11557452.43     | 39222726.70      | 0.81 | 113.99   | 304.58    | 771.08    | 2197.17    |
| 0.41 | 813785.37      | 3031402.34      | 9222718.64      | 31597232.75      | 0.82 | 88.26    | 230.33    | 573.37    | 1634.75    |
| 0.42 | 640676.57      | 2385453.53      | 7326326.81      | 24313992.81      | 0.83 | 68.20    | 170.68    | 420.31    | 1185.30    |
| 0.43 | 504192.59      | 1888836.60      | 5661610.19      | 19321239.91      | 0.84 | 51.96    | 126.23    | 305.94    | 860.43     |
| 0.44 | 407516.28      | 1484890.65      | 4415991.49      | 14997098.18      | 0.85 | 39.14    | 92.77     | 223.63    | 597.24     |
| 0.45 | 324906.13      | 1193496.24      | 3599274.42      | 11930785.27      | 0.86 | 29.82    | 67.72     | 156.89    | 416.65     |
| 0.46 | 265650.78      | 968804.95       | 2895133.82      | 9522718.23       | 0.87 | 22.39    | 49.30     | 109.56    | 287.48     |
| 0.47 | 214650.87      | 774066.22       | 2275665.32      | 7617130.12       | 0.88 | 16.62    | 35.23     | 75.59     | 194.32     |
| 0.48 | 175479.95      | 624023.23       | 1793886.82      | 6051046.39       | 0.89 | 12.23    | 24.80     | 52.26     | 129.29     |
| 0.49 | 142441.02      | 506988.83       | 1454380.26      | 4781594.84       | 0.90 | 8.78     | 17.02     | 34.28     | 81.20      |
| 0.50 | 115671.44      | 408288.84       | 1194886.23      | 3791540.65       |      |          |           |           |            |

Table S159: Critical values for detector  $\hat{H}_{sn}^m$  and IM-OLS estimation in a model with intercept. The number of integrated regressors is 4 and the highest power of  $x_{kt}$  is 3.



| m    | 90 %          | 95 %           | 97,5 %         | 99 %            | m    | 90 %     | 95 %     | 97,5 %    | 99 %      |
|------|---------------|----------------|----------------|-----------------|------|----------|----------|-----------|-----------|
| 0.10 | 7014890401.21 | 24240587372.50 | 67444378398.66 | 216311753527.98 | 0.51 | 17895.76 | 57219.43 | 157764.72 | 456555.68 |
| 0.11 | 3759396923.85 | 12968253972.55 | 36240324212.02 | 111548194654.89 | 0.52 | 14567.33 | 46234.51 | 125070.27 | 362242.98 |
| 0.12 | 2069166317.03 | 7214229428.40  | 20482177347.20 | 62951768078.55  | 0.53 | 11885.98 | 37612.95 | 103223.31 | 302961.14 |
| 0.13 | 1219780660.45 | 4141867639.95  | 11529925173.52 | 36026340050.57  | 0.54 | 9768.40  | 30887.79 | 81889.51  | 241353.50 |
| 0.14 | 727015259.39  | 2439798417.88  | 6870144534.24  | 21373014467.17  | 0.55 | 7867.07  | 24093.10 | 64625.34  | 195083.32 |
| 0.15 | 442555837.32  | 1503654817.25  | 4407364568.03  | 13899573391.84  | 0.56 | 6436.80  | 19663.34 | 51778.97  | 154834.68 |
| 0.16 | 283143175.39  | 971733887.27   | 2751242620.11  | 8646211236.27   | 0.57 | 5272.64  | 15611.87 | 40663.76  | 123906.91 |
| 0.17 | 182813406.09  | 618429903.40   | 1719626516.02  | 5445172469.05   | 0.58 | 4284.57  | 12503.09 | 32278.25  | 98696.96  |
| 0.18 | 117854238.37  | 402682345.20   | 1136181193.96  | 3457748715.26   | 0.59 | 3483.97  | 10116.95 | 25916.24  | 79090.01  |
| 0.19 | 80968873.57   | 275177725.31   | 756844545.61   | 2443690046.68   | 0.60 | 2843.15  | 8189.97  | 20792.50  | 63664.57  |
| 0.20 | 56673075.90   | 191927736.27   | 522087543.73   | 1683877258.91   | 0.61 | 2316.54  | 6548.95  | 16770.26  | 49019.63  |
| 0.21 | 39159038.02   | 135267452.17   | 372125122.24   | 1177899195.30   | 0.62 | 1878.31  | 5316.12  | 13479.05  | 40455.90  |
| 0.22 | 27852635.69   | 95394491.13    | 265204659.06   | 827757417.97    | 0.63 | 1530.51  | 4233.22  | 10953.46  | 31938.11  |
| 0.23 | 20102652.35   | 68521275.55    | 191591729.25   | 587668860.46    | 0.64 | 1242.55  | 3358.54  | 8777.64   | 25158.24  |
| 0.24 | 14795280.06   | 50105717.33    | 140330517.88   | 416371655.76    | 0.65 | 1011.28  | 2779.67  | 6993.36   | 20544.68  |
| 0.25 | 10692668.79   | 36095394.82    | 102067750.46   | 308127439.29    | 0.66 | 827.88   | 2248.62  | 5706.34   | 16363.91  |
| 0.26 | 7920626.64    | 26695460.43    | 73203679.17    | 230890371.75    | 0.67 | 668.64   | 1783.69  | 4417.40   | 12989.36  |
| 0.27 | 5796571.05    | 19707449.80    | 54265724.43    | 169588705.36    | 0.68 | 547.72   | 1410.35  | 3537.91   | 10820.93  |
| 0.28 | 4282397.26    | 14900560.69    | 41047417.13    | 123139099.13    | 0.69 | 445.02   | 1140.95  | 2754.30   | 8088.62   |
| 0.29 | 3209766.96    | 11004758.04    | 31134500.58    | 95932658.44     | 0.70 | 358.11   | 911.72   | 2186.51   | 6401.71   |
| 0.30 | 2406672.96    | 8294625.43     | 22675624.14    | 68834258.73     | 0.71 | 287.10   | 723.94   | 1732.82   | 5083.62   |
| 0.31 | 1851261.48    | 6312377.15     | 17732767.27    | 53524561.88     | 0.72 | 230.66   | 572.95   | 1379.91   | 4023.79   |
| 0.32 | 1395926.14    | 4819909.44     | 13827708.63    | 40905798.30     | 0.73 | 187.52   | 454.29   | 1083.59   | 3000.10   |
| 0.33 | 1076160.52    | 3757025.98     | 10602027.78    | 31061862.44     | 0.74 | 151.01   | 358.85   | 840.93    | 2313.07   |
| 0.34 | 840277.61     | 2846303.34     | 8169238.53     | 24046255.67     | 0.75 | 121.12   | 282.30   | 654.34    | 1785.54   |
| 0.35 | 657667.03     | 2255919.85     | 6268015.11     | 19094353.42     | 0.76 | 96.94    | 224.25   | 511.88    | 1381.36   |
| 0.36 | 514569.94     | 1744427.48     | 4862184.64     | 15164259.84     | 0.77 | 76.75    | 171.40   | 389.75    | 1044.16   |
| 0.37 | 401372.26     | 1359231.54     | 3897210.34     | 12140841.62     | 0.78 | 60.41    | 131.46   | 296.32    | 788.78    |
| 0.38 | 316459.34     | 1076172.92     | 2986605.53     | 9120589.39      | 0.79 | 48.42    | 101.91   | 224.42    | 598.11    |
| 0.39 | 249310.54     | 856601.86      | 2339219.07     | 7220590.65      | 0.80 | 37.89    | 77.88    | 169.71    | 451.31    |
| 0.40 | 194519.70     | 670614.65      | 1872853.77     | 5751014.90      | 0.81 | 29.81    | 61.37    | 127.93    | 336.16    |
| 0.41 | 155915.77     | 531514.82      | 1478032.07     | 4412244.95      | 0.82 | 23.33    | 47.05    | 97.33     | 246.95    |
| 0.42 | 123280.54     | 412216.65      | 1142454.57     | 3518934.45      | 0.83 | 18.04    | 35.33    | 72.93     | 183.34    |
| 0.43 | 97498.04      | 328046.73      | 935219.68      | 2832411.49      | 0.84 | 13.92    | 26.43    | 52.44     | 128.17    |
| 0.44 | 77604.69      | 257047.50      | 725864.60      | 2186952.09      | 0.85 | 10.51    | 20.22    | 38.92     | 91.02     |
| 0.45 | 62880.09      | 205968.32      | 588423.48      | 1812194.07      | 0.86 | 7.98     | 14.84    | 27.57     | 61.56     |
| 0.46 | 50966.19      | 168667.37      | 468205.56      | 1399352.99      | 0.87 | 5.90     | 10.83    | 19.87     | 45.37     |
| 0.47 | 41230.94      | 134710.79      | 377414.16      | 1148353.13      | 0.88 | 4.31     | 7.66     | 13.80     | 30.79     |
| 0.48 | 33026.39      | 109209.07      | 305717.69      | 919642.17       | 0.89 | 3.14     | 5.44     | 9.42      | 19.84     |
| 0.49 | 27275.53      | 89708.46       | 240817.74      | 741477.33       | 0.90 | 2.26     | 3.86     | 6.49      | 13.19     |
| 0.50 | 21960.51      | 70444.79       | 194450.10      | 574341.21       |      |          |          |           |           |

Table S160: Critical values for detector  $\hat{H}_{sn}^m$  and FM-OLS and D-OLS estimation in a model with intercept and linear trend. The number of integrated regressors is 4 and the highest power of  $x_{kt}$  is 3.

| m    | 90 %           | 95 %            | 97,5 %          | 99 %             | m    | 90 %      | 95 %      | 97,5 %     | 99 %       |
|------|----------------|-----------------|-----------------|------------------|------|-----------|-----------|------------|------------|
| 0.10 | 47860425789.86 | 171303333993.54 | 505448260329.87 | 1746343138354.29 | 0.51 | 107532.84 | 372262.33 | 1053912.67 | 3382817.86 |
| 0.11 | 24577857481.10 | 91025083290.34  | 266599124978.89 | 883066108974.39  | 0.52 | 88547.26  | 303903.03 | 850019.83  | 2800126.18 |
| 0.12 | 13931343500.46 | 48963965814.49  | 151194155109.98 | 485397406417.95  | 0.53 | 71502.23  | 244734.46 | 695718.55  | 2178580.88 |
| 0.13 | 7952010461.93  | 28446051571.38  | 86864132519.37  | 301422904080.04  | 0.54 | 57724.94  | 195075.99 | 559891.40  | 1704265.73 |
| 0.14 | 4793438679.35  | 17628180422.64  | 52862006298.27  | 180483802039.59  | 0.55 | 47225.06  | 157392.89 | 446650.54  | 1411476.96 |
| 0.15 | 2900928157.65  | 10626217603.30  | 31830542827.65  | 108454714646.37  | 0.56 | 38037.68  | 127205.34 | 364649.04  | 1190369.32 |
| 0.16 | 1832059054.76  | 6706118286.93   | 20585273762.17  | 67744967755.67   | 0.57 | 30826.58  | 104703.51 | 295009.48  | 937985.14  |
| 0.17 | 1228118748.97  | 4427830231.92   | 13393575284.82  | 43418008894.79   | 0.58 | 24925.59  | 83290.80  | 232832.60  | 754211.71  |
| 0.18 | 800306284.02   | 2986330971.05   | 8660534911.34   | 28155023280.23   | 0.59 | 20169.90  | 67936.50  | 192182.59  | 587294.46  |
| 0.19 | 540301751.65   | 2015609213.20   | 5754641265.80   | 19048196141.07   | 0.60 | 16191.05  | 54361.45  | 155224.37  | 482571.66  |
| 0.20 | 369904501.01   | 1346961605.73   | 4029323788.46   | 13883011619.15   | 0.61 | 13073.87  | 43765.62  | 124528.23  | 393032.16  |
| 0.21 | 253599801.70   | 936185925.01    | 2849866895.75   | 9515764291.21    | 0.62 | 10722.46  | 34869.58  | 97359.06   | 307043.70  |
| 0.22 | 177044015.86   | 651548743.42    | 1950428481.94   | 6455904535.41    | 0.63 | 8708.63   | 27630.93  | 76613.78   | 246296.88  |
| 0.23 | 127346629.04   | 459537887.62    | 1387350984.03   | 4625718839.42    | 0.64 | 7130.47   | 22056.15  | 61949.38   | 192452.70  |
| 0.24 | 90497909.34    | 334290625.19    | 999530191.68    | 3481243980.54    | 0.65 | 5786.80   | 17705.77  | 48530.65   | 151485.80  |
| 0.25 | 64755047.99    | 234957028.44    | 704773070.41    | 2484530757.67    | 0.66 | 4681.32   | 14210.40  | 37872.33   | 120925.21  |
| 0.26 | 47296298.58    | 173601856.34    | 506496935.42    | 1721814869.79    | 0.67 | 3781.98   | 11311.11  | 30507.54   | 94300.04   |
| 0.27 | 35655584.79    | 128332037.17    | 379100249.13    | 1279024923.51    | 0.68 | 3092.78   | 9283.77   | 24310.30   | 74153.98   |
| 0.28 | 26904775.31    | 96114801.59     | 283307982.42    | 934520011.62     | 0.69 | 2455.42   | 7472.58   | 19927.55   | 58263.56   |
| 0.29 | 20584053.13    | 73491838.63     | 212215696.32    | 696376628.36     | 0.70 | 2004.75   | 5952.71   | 15517.20   | 46028.04   |
| 0.30 | 15458414.30    | 55829196.84     | 160497668.95    | 521030132.02     | 0.71 | 1585.95   | 4653.68   | 12038.20   | 37221.93   |
| 0.31 | 11620500.34    | 42779441.37     | 120945127.18    | 395586137.08     | 0.72 | 1258.44   | 3661.21   | 9329.38    | 29320.01   |
| 0.32 | 8929118.70     | 32852657.06     | 95395792.38     | 298889038.65     | 0.73 | 1006.79   | 2888.40   | 7354.26    | 21669.88   |
| 0.33 | 6963394.51     | 24960860.37     | 74584260.35     | 237421034.10     | 0.74 | 806.76    | 2264.67   | 5819.06    | 17040.65   |
| 0.34 | 5395240.50     | 19697913.84     | 59359350.78     | 183916676.11     | 0.75 | 635.80    | 1764.43   | 4577.48    | 13114.70   |
| 0.35 | 4128042.10     | 15482431.23     | 45198280.39     | 141695499.98     | 0.76 | 503.42    | 1348.99   | 3442.39    | 10140.04   |
| 0.36 | 3207210.88     | 11928278.50     | 34983455.84     | 108822837.63     | 0.77 | 397.10    | 1030.92   | 2704.70    | 7691.79    |
| 0.37 | 2539906.63     | 9276396.99      | 27357629.55     | 87965194.74      | 0.78 | 311.49    | 791.86    | 2014.42    | 5773.24    |
| 0.38 | 1968439.30     | 7059866.79      | 20387286.05     | 68939294.80      | 0.79 | 247.65    | 612.81    | 1508.72    | 4390.78    |
| 0.39 | 1532980.45     | 5482680.94      | 15821353.56     | 55320483.50      | 0.80 | 191.67    | 465.90    | 1156.59    | 3267.94    |
| 0.40 | 1207041.58     | 4351482.63      | 12576435.23     | 41772602.20      | 0.81 | 150.06    | 359.40    | 865.34     | 2468.03    |
| 0.41 | 947985.78      | 3428253.60      | 10058772.99     | 33788363.98      | 0.82 | 117.01    | 272.02    | 640.77     | 1808.89    |
| 0.42 | 751879.50      | 2686041.65      | 7957824.76      | 25993537.33      | 0.83 | 90.01     | 202.12    | 470.63     | 1311.83    |
| 0.43 | 590373.51      | 2162031.87      | 6129397.10      | 20700210.23      | 0.84 | 68.43     | 149.49    | 338.82     | 912.39     |
| 0.44 | 476523.29      | 1699110.35      | 4921579.67      | 16023120.41      | 0.85 | 51.53     | 109.76    | 245.93     | 646.18     |
| 0.45 | 375991.12      | 1340931.00      | 3945696.29      | 12912888.84      | 0.86 | 38.94     | 81.54     | 172.91     | 451.57     |
| 0.46 | 306852.08      | 1092994.73      | 3135328.55      | 10316135.46      | 0.87 | 29.11     | 58.30     | 123.55     | 312.16     |
| 0.47 | 250227.06      | 882042.63       | 2527244.79      | 8255806.15       | 0.88 | 21.39     | 41.68     | 86.78      | 210.86     |
| 0.48 | 203150.53      | 711384.45       | 1982663.98      | 6457699.20       | 0.89 | 15.45     | 29.16     | 58.80      | 142.26     |
| 0.49 | 164293.43      | 573738.98       | 1623483.61      | 5125402.54       | 0.90 | 11.04     | 20.37     | 38.41      | 93.63      |
| 0.50 | 134322.51      | 464261.20       | 1290622.78      | 4239152.56       |      |           |           |            |            |

Table S161: Critical values for detector  $\hat{H}_{sn}^m$  and IM-OLS estimation in a model with intercept and linear trend. The number of integrated regressors is 4 and the highest power of  $x_{kt}$  is 3.

## 4 Detector: $\hat{H}_{mov}^{m,n}$

### 4.1 Number of I(1) regressors: 1

| m    | 90 %  | 95 %   | 97,5 % | 99 %   | m    | 90 % | 95 % | 97,5 % | 99 % |
|------|-------|--------|--------|--------|------|------|------|--------|------|
| 0.10 | 70.25 | 129.94 | 217.61 | 385.49 | 0.51 | 0.71 | 1.16 | 1.80   | 2.90 |
| 0.11 | 55.99 | 102.97 | 170.81 | 305.23 | 0.52 | 0.66 | 1.08 | 1.64   | 2.64 |
| 0.12 | 45.24 | 84.05  | 140.61 | 252.74 | 0.53 | 0.61 | 0.99 | 1.50   | 2.40 |
| 0.13 | 37.04 | 68.48  | 114.90 | 206.92 | 0.54 | 0.57 | 0.91 | 1.38   | 2.25 |
| 0.14 | 30.92 | 57.04  | 95.78  | 165.17 | 0.55 | 0.53 | 0.84 | 1.27   | 2.04 |
| 0.15 | 26.08 | 47.91  | 79.02  | 138.46 | 0.56 | 0.49 | 0.79 | 1.19   | 1.90 |
| 0.16 | 22.32 | 40.83  | 67.44  | 116.78 | 0.57 | 0.46 | 0.73 | 1.10   | 1.73 |
| 0.17 | 19.28 | 35.06  | 58.02  | 101.47 | 0.58 | 0.43 | 0.67 | 1.01   | 1.62 |
| 0.18 | 16.56 | 30.27  | 49.48  | 86.85  | 0.59 | 0.40 | 0.63 | 0.95   | 1.48 |
| 0.19 | 14.42 | 26.43  | 43.16  | 75.15  | 0.60 | 0.37 | 0.58 | 0.86   | 1.34 |
| 0.20 | 12.60 | 23.06  | 37.77  | 64.07  | 0.61 | 0.34 | 0.53 | 0.79   | 1.23 |
| 0.21 | 11.10 | 20.16  | 33.57  | 56.43  | 0.62 | 0.32 | 0.49 | 0.73   | 1.13 |
| 0.22 | 9.76  | 17.70  | 29.76  | 50.25  | 0.63 | 0.29 | 0.45 | 0.66   | 1.04 |
| 0.23 | 8.65  | 15.78  | 25.86  | 44.71  | 0.64 | 0.27 | 0.41 | 0.61   | 0.94 |
| 0.24 | 7.67  | 13.95  | 22.69  | 39.98  | 0.65 | 0.25 | 0.38 | 0.56   | 0.86 |
| 0.25 | 6.94  | 12.46  | 20.74  | 35.94  | 0.66 | 0.23 | 0.35 | 0.51   | 0.79 |
| 0.26 | 6.22  | 11.18  | 18.51  | 31.25  | 0.67 | 0.22 | 0.33 | 0.47   | 0.71 |
| 0.27 | 5.60  | 10.01  | 16.65  | 28.12  | 0.68 | 0.20 | 0.30 | 0.43   | 0.65 |
| 0.28 | 5.04  | 9.03   | 14.74  | 25.57  | 0.69 | 0.18 | 0.28 | 0.39   | 0.59 |
| 0.29 | 4.54  | 8.13   | 13.26  | 22.82  | 0.70 | 0.17 | 0.25 | 0.36   | 0.53 |
| 0.30 | 4.09  | 7.31   | 11.86  | 20.58  | 0.71 | 0.16 | 0.23 | 0.33   | 0.48 |
| 0.31 | 3.74  | 6.65   | 10.78  | 18.88  | 0.72 | 0.15 | 0.21 | 0.30   | 0.44 |
| 0.32 | 3.40  | 6.08   | 9.86   | 16.99  | 0.73 | 0.13 | 0.20 | 0.27   | 0.39 |
| 0.33 | 3.11  | 5.43   | 8.96   | 15.43  | 0.74 | 0.12 | 0.18 | 0.25   | 0.35 |
| 0.34 | 2.85  | 4.98   | 8.12   | 14.28  | 0.75 | 0.11 | 0.16 | 0.22   | 0.32 |
| 0.35 | 2.59  | 4.54   | 7.34   | 12.49  | 0.76 | 0.10 | 0.15 | 0.20   | 0.29 |
| 0.36 | 2.37  | 4.17   | 6.68   | 11.49  | 0.77 | 0.09 | 0.13 | 0.18   | 0.26 |
| 0.37 | 2.18  | 3.79   | 6.09   | 10.45  | 0.78 | 0.08 | 0.12 | 0.16   | 0.23 |
| 0.38 | 1.97  | 3.41   | 5.46   | 9.48   | 0.79 | 0.08 | 0.11 | 0.15   | 0.21 |
| 0.39 | 1.80  | 3.14   | 5.01   | 8.59   | 0.80 | 0.07 | 0.10 | 0.13   | 0.18 |
| 0.40 | 1.67  | 2.86   | 4.52   | 7.74   | 0.81 | 0.06 | 0.09 | 0.12   | 0.16 |
| 0.41 | 1.54  | 2.62   | 4.16   | 6.92   | 0.82 | 0.06 | 0.08 | 0.10   | 0.14 |
| 0.42 | 1.41  | 2.40   | 3.80   | 6.30   | 0.83 | 0.05 | 0.07 | 0.09   | 0.12 |
| 0.43 | 1.31  | 2.22   | 3.50   | 5.80   | 0.84 | 0.04 | 0.06 | 0.08   | 0.11 |
| 0.44 | 1.22  | 2.05   | 3.22   | 5.30   | 0.85 | 0.04 | 0.05 | 0.07   | 0.09 |
| 0.45 | 1.12  | 1.88   | 2.94   | 4.90   | 0.86 | 0.03 | 0.05 | 0.06   | 0.08 |
| 0.46 | 1.04  | 1.73   | 2.70   | 4.50   | 0.87 | 0.03 | 0.04 | 0.05   | 0.07 |
| 0.47 | 0.96  | 1.61   | 2.49   | 4.13   | 0.88 | 0.03 | 0.03 | 0.04   | 0.06 |
| 0.48 | 0.89  | 1.48   | 2.30   | 3.78   | 0.89 | 0.02 | 0.03 | 0.04   | 0.05 |
| 0.49 | 0.82  | 1.37   | 2.10   | 3.42   | 0.90 | 0.02 | 0.03 | 0.03   | 0.04 |
| 0.50 | 0.76  | 1.27   | 1.95   | 3.19   |      |      |      |        |      |

Table S162: Critical values for detector  $\hat{H}_{mov}^{m,0.1}$  with windows size  $n = 0.1$ , and FM-OLS and D-OLS estimation in a model with intercept. The number of integrated regressors is 1 and the highest power of  $x_{kt}$  is 1.

| m    | 90 %   | 95 %   | 97,5 % | 99 %   | m    | 90 % | 95 % | 97,5 % | 99 % |
|------|--------|--------|--------|--------|------|------|------|--------|------|
| 0.10 | 137.10 | 274.24 | 482.74 | 905.11 | 0.51 | 1.35 | 2.42 | 4.04   | 7.32 |
| 0.11 | 109.17 | 217.72 | 387.24 | 720.62 | 0.52 | 1.25 | 2.25 | 3.70   | 6.65 |
| 0.12 | 88.02  | 176.71 | 311.83 | 596.53 | 0.53 | 1.15 | 2.07 | 3.39   | 6.09 |
| 0.13 | 73.39  | 143.69 | 254.77 | 499.55 | 0.54 | 1.07 | 1.91 | 3.13   | 5.60 |
| 0.14 | 60.43  | 121.09 | 213.91 | 412.69 | 0.55 | 1.00 | 1.76 | 2.88   | 5.06 |
| 0.15 | 50.41  | 101.19 | 180.75 | 344.37 | 0.56 | 0.92 | 1.62 | 2.66   | 4.65 |
| 0.16 | 43.18  | 86.18  | 152.08 | 290.29 | 0.57 | 0.86 | 1.49 | 2.44   | 4.28 |
| 0.17 | 37.16  | 72.43  | 129.60 | 252.72 | 0.58 | 0.80 | 1.38 | 2.26   | 3.98 |
| 0.18 | 32.17  | 63.44  | 112.24 | 216.51 | 0.59 | 0.75 | 1.27 | 2.09   | 3.71 |
| 0.19 | 28.08  | 54.96  | 98.26  | 185.32 | 0.60 | 0.69 | 1.18 | 1.92   | 3.37 |
| 0.20 | 24.38  | 48.04  | 84.92  | 166.06 | 0.61 | 0.64 | 1.09 | 1.77   | 3.08 |
| 0.21 | 21.52  | 42.24  | 75.72  | 144.97 | 0.62 | 0.60 | 1.01 | 1.63   | 2.83 |
| 0.22 | 19.00  | 37.79  | 66.55  | 124.93 | 0.63 | 0.56 | 0.93 | 1.50   | 2.59 |
| 0.23 | 16.75  | 33.10  | 58.84  | 110.49 | 0.64 | 0.52 | 0.86 | 1.37   | 2.36 |
| 0.24 | 14.84  | 29.43  | 51.94  | 98.14  | 0.65 | 0.48 | 0.80 | 1.26   | 2.15 |
| 0.25 | 13.27  | 26.15  | 46.05  | 88.86  | 0.66 | 0.45 | 0.73 | 1.15   | 1.96 |
| 0.26 | 11.88  | 23.28  | 41.12  | 78.39  | 0.67 | 0.42 | 0.68 | 1.06   | 1.78 |
| 0.27 | 10.69  | 20.92  | 37.06  | 69.58  | 0.68 | 0.38 | 0.63 | 0.97   | 1.63 |
| 0.28 | 9.72   | 18.84  | 33.25  | 62.26  | 0.69 | 0.36 | 0.58 | 0.89   | 1.46 |
| 0.29 | 8.82   | 17.02  | 29.63  | 56.68  | 0.70 | 0.33 | 0.53 | 0.81   | 1.33 |
| 0.30 | 7.96   | 15.46  | 26.74  | 50.76  | 0.71 | 0.31 | 0.49 | 0.74   | 1.22 |
| 0.31 | 7.18   | 13.91  | 24.19  | 45.91  | 0.72 | 0.28 | 0.45 | 0.68   | 1.09 |
| 0.32 | 6.56   | 12.60  | 21.74  | 41.18  | 0.73 | 0.26 | 0.41 | 0.62   | 1.01 |
| 0.33 | 5.96   | 11.40  | 19.72  | 36.86  | 0.74 | 0.24 | 0.38 | 0.56   | 0.91 |
| 0.34 | 5.39   | 10.40  | 17.87  | 33.12  | 0.75 | 0.22 | 0.35 | 0.52   | 0.83 |
| 0.35 | 4.96   | 9.47   | 16.25  | 30.16  | 0.76 | 0.21 | 0.32 | 0.47   | 0.74 |
| 0.36 | 4.56   | 8.68   | 14.80  | 27.57  | 0.77 | 0.19 | 0.29 | 0.43   | 0.68 |
| 0.37 | 4.19   | 7.81   | 13.54  | 25.40  | 0.78 | 0.17 | 0.27 | 0.39   | 0.61 |
| 0.38 | 3.82   | 7.08   | 12.37  | 23.27  | 0.79 | 0.16 | 0.24 | 0.35   | 0.55 |
| 0.39 | 3.47   | 6.52   | 11.31  | 21.16  | 0.80 | 0.15 | 0.22 | 0.32   | 0.49 |
| 0.40 | 3.20   | 6.01   | 10.40  | 18.95  | 0.81 | 0.13 | 0.20 | 0.29   | 0.44 |
| 0.41 | 2.92   | 5.50   | 9.55   | 17.36  | 0.82 | 0.12 | 0.18 | 0.26   | 0.40 |
| 0.42 | 2.69   | 5.03   | 8.63   | 15.95  | 0.83 | 0.11 | 0.17 | 0.23   | 0.35 |
| 0.43 | 2.48   | 4.65   | 7.96   | 14.65  | 0.84 | 0.10 | 0.15 | 0.21   | 0.31 |
| 0.44 | 2.30   | 4.27   | 7.28   | 13.41  | 0.85 | 0.09 | 0.14 | 0.19   | 0.28 |
| 0.45 | 2.12   | 3.96   | 6.69   | 12.19  | 0.86 | 0.08 | 0.12 | 0.17   | 0.25 |
| 0.46 | 1.97   | 3.63   | 6.11   | 11.13  | 0.87 | 0.07 | 0.11 | 0.15   | 0.22 |
| 0.47 | 1.81   | 3.36   | 5.62   | 10.14  | 0.88 | 0.07 | 0.10 | 0.13   | 0.19 |
| 0.48 | 1.68   | 3.07   | 5.21   | 9.39   | 0.89 | 0.06 | 0.09 | 0.12   | 0.17 |
| 0.49 | 1.56   | 2.81   | 4.78   | 8.72   | 0.90 | 0.05 | 0.08 | 0.10   | 0.15 |
| 0.50 | 1.45   | 2.61   | 4.39   | 7.99   |      |      |      |        |      |

Table S163: Critical values for detector  $\hat{H}_{mov}^{m,0.1}$  with windows size  $n = 0.1$ , and IM-OLS estimation in a model with intercept. The number of integrated regressors is 1 and the highest power of  $x_{kt}$  is 1.

| m    | 90 %   | 95 %   | 97,5 % | 99 %   | m    | 90 % | 95 % | 97,5 % | 99 % |
|------|--------|--------|--------|--------|------|------|------|--------|------|
| 0.10 | 111.03 | 207.56 | 348.96 | 631.98 | 0.51 | 1.08 | 1.76 | 2.74   | 4.41 |
| 0.11 | 87.99  | 165.02 | 276.78 | 497.92 | 0.52 | 1.00 | 1.64 | 2.48   | 3.96 |
| 0.12 | 71.51  | 134.63 | 226.96 | 412.63 | 0.53 | 0.92 | 1.49 | 2.25   | 3.61 |
| 0.13 | 58.59  | 109.43 | 186.35 | 337.66 | 0.54 | 0.85 | 1.38 | 2.06   | 3.36 |
| 0.14 | 49.16  | 91.76  | 155.90 | 270.56 | 0.55 | 0.79 | 1.26 | 1.90   | 3.05 |
| 0.15 | 41.28  | 77.20  | 128.53 | 225.51 | 0.56 | 0.73 | 1.18 | 1.77   | 2.83 |
| 0.16 | 35.43  | 65.50  | 109.84 | 190.44 | 0.57 | 0.68 | 1.08 | 1.64   | 2.54 |
| 0.17 | 30.57  | 56.32  | 93.85  | 165.49 | 0.58 | 0.63 | 1.00 | 1.49   | 2.37 |
| 0.18 | 26.36  | 48.74  | 80.33  | 141.77 | 0.59 | 0.59 | 0.93 | 1.38   | 2.15 |
| 0.19 | 22.99  | 42.57  | 69.95  | 122.82 | 0.60 | 0.54 | 0.85 | 1.25   | 1.95 |
| 0.20 | 20.06  | 37.19  | 61.29  | 104.21 | 0.61 | 0.50 | 0.78 | 1.14   | 1.77 |
| 0.21 | 17.68  | 32.59  | 54.43  | 92.69  | 0.62 | 0.46 | 0.71 | 1.05   | 1.61 |
| 0.22 | 15.50  | 28.46  | 47.99  | 81.85  | 0.63 | 0.42 | 0.65 | 0.96   | 1.48 |
| 0.23 | 13.73  | 25.31  | 41.80  | 72.81  | 0.64 | 0.39 | 0.59 | 0.87   | 1.35 |
| 0.24 | 12.17  | 22.45  | 36.66  | 64.86  | 0.65 | 0.36 | 0.55 | 0.79   | 1.21 |
| 0.25 | 11.00  | 19.98  | 33.39  | 58.59  | 0.66 | 0.33 | 0.50 | 0.73   | 1.10 |
| 0.26 | 9.87   | 17.98  | 29.90  | 50.88  | 0.67 | 0.31 | 0.46 | 0.65   | 0.99 |
| 0.27 | 8.88   | 16.12  | 26.82  | 45.50  | 0.68 | 0.28 | 0.42 | 0.60   | 0.90 |
| 0.28 | 7.98   | 14.43  | 23.78  | 41.12  | 0.69 | 0.26 | 0.38 | 0.53   | 0.80 |
| 0.29 | 7.19   | 13.06  | 21.32  | 36.80  | 0.70 | 0.24 | 0.35 | 0.49   | 0.72 |
| 0.30 | 6.49   | 11.67  | 19.09  | 32.91  | 0.71 | 0.22 | 0.32 | 0.44   | 0.64 |
| 0.31 | 5.91   | 10.59  | 17.35  | 30.43  | 0.72 | 0.20 | 0.29 | 0.40   | 0.58 |
| 0.32 | 5.36   | 9.66   | 15.78  | 27.33  | 0.73 | 0.19 | 0.26 | 0.36   | 0.52 |
| 0.33 | 4.89   | 8.64   | 14.26  | 24.71  | 0.74 | 0.17 | 0.24 | 0.33   | 0.46 |
| 0.34 | 4.46   | 7.90   | 13.00  | 22.96  | 0.75 | 0.15 | 0.22 | 0.29   | 0.40 |
| 0.35 | 4.07   | 7.18   | 11.67  | 19.97  | 0.76 | 0.14 | 0.20 | 0.26   | 0.37 |
| 0.36 | 3.73   | 6.57   | 10.62  | 18.29  | 0.77 | 0.13 | 0.18 | 0.23   | 0.33 |
| 0.37 | 3.40   | 5.98   | 9.62   | 16.57  | 0.78 | 0.12 | 0.16 | 0.21   | 0.29 |
| 0.38 | 3.09   | 5.39   | 8.70   | 14.99  | 0.79 | 0.11 | 0.14 | 0.19   | 0.25 |
| 0.39 | 2.81   | 4.93   | 7.95   | 13.59  | 0.80 | 0.10 | 0.13 | 0.17   | 0.22 |
| 0.40 | 2.59   | 4.49   | 7.13   | 12.18  | 0.81 | 0.09 | 0.12 | 0.15   | 0.20 |
| 0.41 | 2.39   | 4.08   | 6.47   | 10.87  | 0.82 | 0.08 | 0.11 | 0.14   | 0.18 |
| 0.42 | 2.19   | 3.74   | 5.96   | 9.82   | 0.83 | 0.07 | 0.10 | 0.12   | 0.16 |
| 0.43 | 2.02   | 3.45   | 5.48   | 9.07   | 0.84 | 0.07 | 0.09 | 0.11   | 0.15 |
| 0.44 | 1.87   | 3.17   | 4.98   | 8.21   | 0.85 | 0.06 | 0.08 | 0.10   | 0.13 |
| 0.45 | 1.72   | 2.91   | 4.57   | 7.59   | 0.86 | 0.06 | 0.08 | 0.10   | 0.12 |
| 0.46 | 1.59   | 2.68   | 4.16   | 7.03   | 0.87 | 0.05 | 0.07 | 0.09   | 0.12 |
| 0.47 | 1.46   | 2.48   | 3.85   | 6.36   | 0.88 | 0.05 | 0.07 | 0.08   | 0.11 |
| 0.48 | 1.36   | 2.26   | 3.54   | 5.77   | 0.89 | 0.05 | 0.06 | 0.08   | 0.11 |
| 0.49 | 1.25   | 2.09   | 3.21   | 5.20   | 0.90 | 0.04 | 0.06 | 0.08   | 0.10 |
| 0.50 | 1.16   | 1.94   | 2.99   | 4.87   |      |      |      |        |      |

Table S164: Critical values for detector  $\hat{H}_{mov}^{m,0.2}$  with windows size  $n = 0.2$ , and FM-OLS and D-OLS estimation in a model with intercept. The number of integrated regressors is 1 and the highest power of  $x_{kt}$  is 1.

| m    | 90 %   | 95 %   | 97,5 % | 99 %    | m    | 90 % | 95 % | 97,5 % | 99 %  |
|------|--------|--------|--------|---------|------|------|------|--------|-------|
| 0.10 | 215.27 | 436.89 | 782.06 | 1463.32 | 0.51 | 2.05 | 3.70 | 6.13   | 11.19 |
| 0.11 | 172.28 | 346.20 | 623.07 | 1171.22 | 0.52 | 1.90 | 3.43 | 5.65   | 10.07 |
| 0.12 | 139.71 | 283.17 | 504.54 | 970.67  | 0.53 | 1.75 | 3.13 | 5.17   | 9.15  |
| 0.13 | 115.82 | 229.79 | 411.37 | 814.13  | 0.54 | 1.62 | 2.88 | 4.75   | 8.43  |
| 0.14 | 95.25  | 193.78 | 345.59 | 669.35  | 0.55 | 1.49 | 2.64 | 4.35   | 7.65  |
| 0.15 | 80.04  | 162.22 | 292.90 | 563.02  | 0.56 | 1.38 | 2.43 | 3.98   | 6.98  |
| 0.16 | 68.70  | 137.80 | 244.93 | 470.35  | 0.57 | 1.28 | 2.23 | 3.65   | 6.32  |
| 0.17 | 58.88  | 116.52 | 209.71 | 414.02  | 0.58 | 1.19 | 2.05 | 3.35   | 5.89  |
| 0.18 | 51.12  | 101.97 | 181.53 | 355.31  | 0.59 | 1.10 | 1.89 | 3.08   | 5.40  |
| 0.19 | 44.73  | 88.43  | 157.74 | 303.98  | 0.60 | 1.02 | 1.74 | 2.81   | 4.89  |
| 0.20 | 38.81  | 77.22  | 137.26 | 269.46  | 0.61 | 0.95 | 1.61 | 2.58   | 4.47  |
| 0.21 | 34.34  | 67.91  | 121.97 | 234.69  | 0.62 | 0.88 | 1.48 | 2.37   | 4.08  |
| 0.22 | 30.29  | 60.57  | 107.61 | 202.47  | 0.63 | 0.81 | 1.37 | 2.18   | 3.72  |
| 0.23 | 26.71  | 53.32  | 94.78  | 178.84  | 0.64 | 0.75 | 1.25 | 1.99   | 3.34  |
| 0.24 | 23.63  | 47.05  | 83.35  | 157.51  | 0.65 | 0.70 | 1.15 | 1.80   | 3.04  |
| 0.25 | 21.00  | 41.92  | 73.94  | 143.84  | 0.66 | 0.64 | 1.06 | 1.65   | 2.75  |
| 0.26 | 18.85  | 37.20  | 66.02  | 127.28  | 0.67 | 0.60 | 0.97 | 1.50   | 2.50  |
| 0.27 | 16.99  | 33.46  | 59.54  | 112.34  | 0.68 | 0.55 | 0.89 | 1.36   | 2.25  |
| 0.28 | 15.40  | 30.19  | 53.37  | 100.06  | 0.69 | 0.50 | 0.81 | 1.24   | 2.02  |
| 0.29 | 13.94  | 27.22  | 47.50  | 91.80   | 0.70 | 0.46 | 0.74 | 1.12   | 1.83  |
| 0.30 | 12.59  | 24.70  | 42.76  | 81.75   | 0.71 | 0.43 | 0.68 | 1.02   | 1.65  |
| 0.31 | 11.37  | 22.17  | 38.48  | 73.73   | 0.72 | 0.39 | 0.62 | 0.92   | 1.49  |
| 0.32 | 10.33  | 20.04  | 34.72  | 65.93   | 0.73 | 0.36 | 0.57 | 0.84   | 1.35  |
| 0.33 | 9.40   | 18.15  | 31.41  | 58.83   | 0.74 | 0.33 | 0.52 | 0.76   | 1.21  |
| 0.34 | 8.50   | 16.55  | 28.39  | 53.11   | 0.75 | 0.30 | 0.47 | 0.69   | 1.09  |
| 0.35 | 7.81   | 14.99  | 25.68  | 48.37   | 0.76 | 0.28 | 0.43 | 0.62   | 0.98  |
| 0.36 | 7.15   | 13.70  | 23.45  | 44.08   | 0.77 | 0.25 | 0.39 | 0.56   | 0.87  |
| 0.37 | 6.55   | 12.35  | 21.46  | 40.24   | 0.78 | 0.23 | 0.35 | 0.50   | 0.77  |
| 0.38 | 5.96   | 11.23  | 19.53  | 36.57   | 0.79 | 0.21 | 0.32 | 0.45   | 0.69  |
| 0.39 | 5.42   | 10.29  | 17.80  | 33.39   | 0.80 | 0.19 | 0.29 | 0.41   | 0.61  |
| 0.40 | 4.98   | 9.46   | 16.45  | 29.92   | 0.81 | 0.17 | 0.26 | 0.36   | 0.55  |
| 0.41 | 4.58   | 8.61   | 15.00  | 27.09   | 0.82 | 0.15 | 0.23 | 0.32   | 0.48  |
| 0.42 | 4.21   | 7.84   | 13.54  | 24.74   | 0.83 | 0.14 | 0.20 | 0.29   | 0.42  |
| 0.43 | 3.85   | 7.24   | 12.34  | 22.81   | 0.84 | 0.12 | 0.18 | 0.25   | 0.37  |
| 0.44 | 3.58   | 6.63   | 11.30  | 20.80   | 0.85 | 0.11 | 0.16 | 0.22   | 0.33  |
| 0.45 | 3.29   | 6.10   | 10.36  | 18.92   | 0.86 | 0.10 | 0.14 | 0.20   | 0.29  |
| 0.46 | 3.02   | 5.61   | 9.46   | 17.24   | 0.87 | 0.09 | 0.13 | 0.17   | 0.25  |
| 0.47 | 2.79   | 5.14   | 8.67   | 15.75   | 0.88 | 0.08 | 0.11 | 0.15   | 0.22  |
| 0.48 | 2.58   | 4.72   | 7.96   | 14.58   | 0.89 | 0.07 | 0.10 | 0.13   | 0.19  |
| 0.49 | 2.39   | 4.32   | 7.28   | 13.42   | 0.90 | 0.06 | 0.09 | 0.12   | 0.16  |
| 0.50 | 2.21   | 4.00   | 6.71   | 12.16   |      |      |      |        |       |

Table S165: Critical values for detector  $\hat{H}_{mov}^{m,0.2}$  with windows size  $n = 0.2$ , and IM-OLS estimation in a model with intercept. The number of integrated regressors is 1 and the highest power of  $x_{kt}$  is 1.

| m    | 90 %   | 95 %   | 97,5 % | 99 %   | m    | 90 % | 95 % | 97,5 % | 99 % |
|------|--------|--------|--------|--------|------|------|------|--------|------|
| 0.10 | 134.18 | 253.78 | 428.56 | 783.17 | 0.51 | 1.26 | 2.04 | 3.13   | 5.04 |
| 0.11 | 106.76 | 202.49 | 340.33 | 618.32 | 0.52 | 1.16 | 1.88 | 2.84   | 4.54 |
| 0.12 | 86.66  | 165.34 | 278.37 | 505.92 | 0.53 | 1.07 | 1.71 | 2.57   | 4.07 |
| 0.13 | 71.19  | 133.97 | 229.07 | 416.23 | 0.54 | 0.99 | 1.57 | 2.35   | 3.78 |
| 0.14 | 59.69  | 112.28 | 191.36 | 335.29 | 0.55 | 0.92 | 1.44 | 2.16   | 3.42 |
| 0.15 | 50.13  | 94.60  | 158.31 | 278.66 | 0.56 | 0.85 | 1.34 | 1.99   | 3.18 |
| 0.16 | 42.97  | 80.25  | 135.38 | 237.16 | 0.57 | 0.78 | 1.23 | 1.84   | 2.84 |
| 0.17 | 37.11  | 68.60  | 114.97 | 204.90 | 0.58 | 0.73 | 1.13 | 1.66   | 2.63 |
| 0.18 | 32.04  | 59.51  | 98.37  | 173.50 | 0.59 | 0.68 | 1.05 | 1.53   | 2.38 |
| 0.19 | 27.96  | 52.04  | 85.83  | 151.81 | 0.60 | 0.62 | 0.96 | 1.39   | 2.14 |
| 0.20 | 24.33  | 45.31  | 75.14  | 128.60 | 0.61 | 0.58 | 0.87 | 1.26   | 1.93 |
| 0.21 | 21.41  | 39.73  | 66.81  | 114.22 | 0.62 | 0.53 | 0.80 | 1.14   | 1.74 |
| 0.22 | 18.80  | 34.70  | 58.83  | 101.30 | 0.63 | 0.49 | 0.73 | 1.04   | 1.58 |
| 0.23 | 16.65  | 30.79  | 51.20  | 89.42  | 0.64 | 0.45 | 0.66 | 0.95   | 1.44 |
| 0.24 | 14.73  | 27.18  | 44.75  | 79.54  | 0.65 | 0.42 | 0.61 | 0.86   | 1.29 |
| 0.25 | 13.30  | 24.29  | 40.79  | 71.60  | 0.66 | 0.39 | 0.56 | 0.79   | 1.17 |
| 0.26 | 11.90  | 21.84  | 36.45  | 62.14  | 0.67 | 0.36 | 0.51 | 0.70   | 1.04 |
| 0.27 | 10.74  | 19.55  | 32.71  | 55.57  | 0.68 | 0.33 | 0.47 | 0.64   | 0.94 |
| 0.28 | 9.62   | 17.48  | 28.87  | 49.84  | 0.69 | 0.30 | 0.43 | 0.58   | 0.84 |
| 0.29 | 8.66   | 15.78  | 25.81  | 44.55  | 0.70 | 0.28 | 0.39 | 0.53   | 0.75 |
| 0.30 | 7.83   | 14.15  | 23.12  | 39.74  | 0.71 | 0.26 | 0.36 | 0.48   | 0.68 |
| 0.31 | 7.12   | 12.78  | 20.94  | 36.66  | 0.72 | 0.24 | 0.33 | 0.44   | 0.61 |
| 0.32 | 6.43   | 11.63  | 19.00  | 33.08  | 0.73 | 0.22 | 0.31 | 0.40   | 0.55 |
| 0.33 | 5.85   | 10.42  | 17.16  | 29.86  | 0.74 | 0.21 | 0.28 | 0.37   | 0.50 |
| 0.34 | 5.33   | 9.47   | 15.63  | 27.55  | 0.75 | 0.19 | 0.26 | 0.34   | 0.45 |
| 0.35 | 4.86   | 8.63   | 14.04  | 24.05  | 0.76 | 0.18 | 0.24 | 0.31   | 0.42 |
| 0.36 | 4.44   | 7.86   | 12.69  | 21.92  | 0.77 | 0.17 | 0.22 | 0.29   | 0.38 |
| 0.37 | 4.04   | 7.17   | 11.52  | 19.66  | 0.78 | 0.15 | 0.21 | 0.26   | 0.35 |
| 0.38 | 3.69   | 6.43   | 10.37  | 17.79  | 0.79 | 0.14 | 0.19 | 0.25   | 0.32 |
| 0.39 | 3.34   | 5.84   | 9.41   | 16.14  | 0.80 | 0.13 | 0.18 | 0.23   | 0.30 |
| 0.40 | 3.07   | 5.31   | 8.53   | 14.39  | 0.81 | 0.13 | 0.17 | 0.21   | 0.28 |
| 0.41 | 2.83   | 4.85   | 7.67   | 12.92  | 0.82 | 0.12 | 0.16 | 0.20   | 0.26 |
| 0.42 | 2.59   | 4.44   | 7.06   | 11.59  | 0.83 | 0.11 | 0.15 | 0.19   | 0.25 |
| 0.43 | 2.39   | 4.07   | 6.42   | 10.68  | 0.84 | 0.10 | 0.14 | 0.18   | 0.24 |
| 0.44 | 2.21   | 3.72   | 5.85   | 9.62   | 0.85 | 0.10 | 0.13 | 0.17   | 0.23 |
| 0.45 | 2.03   | 3.42   | 5.35   | 8.93   | 0.86 | 0.09 | 0.13 | 0.17   | 0.23 |
| 0.46 | 1.87   | 3.14   | 4.85   | 8.20   | 0.87 | 0.09 | 0.12 | 0.16   | 0.22 |
| 0.47 | 1.72   | 2.90   | 4.45   | 7.34   | 0.88 | 0.09 | 0.12 | 0.16   | 0.21 |
| 0.48 | 1.59   | 2.64   | 4.11   | 6.66   | 0.89 | 0.08 | 0.12 | 0.15   | 0.21 |
| 0.49 | 1.46   | 2.44   | 3.73   | 6.02   | 0.90 | 0.08 | 0.11 | 0.15   | 0.20 |
| 0.50 | 1.35   | 2.24   | 3.46   | 5.58   |      |      |      |        |      |

Table S166: Critical values for detector  $\hat{H}_{mov}^{m,0.3}$  with windows size  $n = 0.3$ , and FM-OLS and D-OLS estimation in a model with intercept. The number of integrated regressors is 1 and the highest power of  $x_{kt}$  is 1.

| m    | 90 %   | 95 %   | 97,5 % | 99 %    | m    | 90 % | 95 % | 97,5 % | 99 %  |
|------|--------|--------|--------|---------|------|------|------|--------|-------|
| 0.10 | 259.56 | 532.56 | 959.54 | 1799.92 | 0.51 | 2.38 | 4.28 | 7.06   | 12.75 |
| 0.11 | 208.48 | 421.99 | 765.68 | 1452.89 | 0.52 | 2.20 | 3.95 | 6.48   | 11.61 |
| 0.12 | 168.42 | 346.15 | 618.11 | 1202.92 | 0.53 | 2.02 | 3.60 | 5.92   | 10.50 |
| 0.13 | 139.97 | 278.44 | 505.85 | 1003.59 | 0.54 | 1.86 | 3.28 | 5.43   | 9.54  |
| 0.14 | 115.49 | 235.40 | 424.11 | 830.25  | 0.55 | 1.71 | 3.02 | 4.95   | 8.63  |
| 0.15 | 96.94  | 197.82 | 358.68 | 691.96  | 0.56 | 1.58 | 2.76 | 4.52   | 7.89  |
| 0.16 | 83.28  | 167.87 | 300.91 | 579.93  | 0.57 | 1.46 | 2.53 | 4.11   | 7.16  |
| 0.17 | 71.40  | 141.92 | 257.62 | 511.44  | 0.58 | 1.35 | 2.32 | 3.77   | 6.54  |
| 0.18 | 61.82  | 124.43 | 221.38 | 434.21  | 0.59 | 1.25 | 2.12 | 3.44   | 5.99  |
| 0.19 | 54.21  | 107.55 | 194.05 | 370.58  | 0.60 | 1.15 | 1.95 | 3.12   | 5.43  |
| 0.20 | 46.95  | 94.67  | 168.78 | 330.71  | 0.61 | 1.07 | 1.80 | 2.87   | 4.92  |
| 0.21 | 41.65  | 82.86  | 149.52 | 287.62  | 0.62 | 0.98 | 1.64 | 2.61   | 4.47  |
| 0.22 | 36.70  | 73.60  | 131.52 | 246.57  | 0.63 | 0.91 | 1.51 | 2.39   | 4.03  |
| 0.23 | 32.29  | 65.16  | 116.20 | 217.50  | 0.64 | 0.84 | 1.39 | 2.18   | 3.63  |
| 0.24 | 28.53  | 57.06  | 101.59 | 192.39  | 0.65 | 0.77 | 1.27 | 1.97   | 3.31  |
| 0.25 | 25.36  | 50.64  | 89.79  | 174.70  | 0.66 | 0.71 | 1.16 | 1.79   | 2.96  |
| 0.26 | 22.84  | 45.21  | 80.13  | 154.84  | 0.67 | 0.65 | 1.05 | 1.62   | 2.67  |
| 0.27 | 20.43  | 40.28  | 72.32  | 136.82  | 0.68 | 0.60 | 0.96 | 1.47   | 2.40  |
| 0.28 | 18.57  | 36.58  | 64.52  | 122.93  | 0.69 | 0.55 | 0.88 | 1.33   | 2.15  |
| 0.29 | 16.84  | 32.87  | 57.23  | 111.15  | 0.70 | 0.50 | 0.80 | 1.20   | 1.94  |
| 0.30 | 15.15  | 29.85  | 51.56  | 98.69   | 0.71 | 0.46 | 0.72 | 1.08   | 1.75  |
| 0.31 | 13.69  | 26.81  | 46.31  | 89.43   | 0.72 | 0.42 | 0.66 | 0.97   | 1.56  |
| 0.32 | 12.37  | 24.18  | 41.88  | 79.45   | 0.73 | 0.38 | 0.60 | 0.87   | 1.40  |
| 0.33 | 11.27  | 21.85  | 37.87  | 70.66   | 0.74 | 0.35 | 0.54 | 0.79   | 1.26  |
| 0.34 | 10.18  | 19.82  | 34.07  | 64.11   | 0.75 | 0.31 | 0.49 | 0.72   | 1.13  |
| 0.35 | 9.30   | 18.03  | 30.67  | 58.10   | 0.76 | 0.29 | 0.45 | 0.64   | 1.00  |
| 0.36 | 8.51   | 16.38  | 28.07  | 52.96   | 0.77 | 0.26 | 0.40 | 0.58   | 0.89  |
| 0.37 | 7.80   | 14.80  | 25.59  | 48.22   | 0.78 | 0.24 | 0.36 | 0.52   | 0.79  |
| 0.38 | 7.09   | 13.41  | 23.19  | 43.66   | 0.79 | 0.21 | 0.32 | 0.47   | 0.70  |
| 0.39 | 6.44   | 12.25  | 21.18  | 39.51   | 0.80 | 0.19 | 0.29 | 0.41   | 0.62  |
| 0.40 | 5.90   | 11.22  | 19.49  | 35.58   | 0.81 | 0.17 | 0.26 | 0.37   | 0.56  |
| 0.41 | 5.40   | 10.22  | 17.75  | 31.95   | 0.82 | 0.16 | 0.24 | 0.33   | 0.49  |
| 0.42 | 4.97   | 9.32   | 16.06  | 29.04   | 0.83 | 0.14 | 0.21 | 0.29   | 0.43  |
| 0.43 | 4.55   | 8.55   | 14.57  | 26.88   | 0.84 | 0.13 | 0.19 | 0.26   | 0.38  |
| 0.44 | 4.20   | 7.84   | 13.29  | 24.36   | 0.85 | 0.11 | 0.17 | 0.23   | 0.33  |
| 0.45 | 3.87   | 7.17   | 12.17  | 22.04   | 0.86 | 0.10 | 0.15 | 0.20   | 0.29  |
| 0.46 | 3.55   | 6.56   | 11.09  | 20.25   | 0.87 | 0.09 | 0.13 | 0.18   | 0.26  |
| 0.47 | 3.28   | 6.00   | 10.07  | 18.40   | 0.88 | 0.08 | 0.12 | 0.16   | 0.22  |
| 0.48 | 3.02   | 5.50   | 9.21   | 16.98   | 0.89 | 0.07 | 0.10 | 0.14   | 0.20  |
| 0.49 | 2.80   | 5.04   | 8.43   | 15.65   | 0.90 | 0.07 | 0.09 | 0.12   | 0.17  |
| 0.50 | 2.58   | 4.64   | 7.75   | 14.04   |      |      |      |        |       |

Table S167: Critical values for detector  $\hat{H}_{mov}^{m,0.3}$  with windows size  $n = 0.3$ , and IM-OLS estimation in a model with intercept. The number of integrated regressors is 1 and the highest power of  $x_{kt}$  is 1.



| m    | 90 %    | 95 %    | 97,5 %  | 99 %    | m    | 90 % | 95 % | 97,5 % | 99 % |
|------|---------|---------|---------|---------|------|------|------|--------|------|
| 0.10 | 1922.44 | 3105.51 | 4768.99 | 7568.82 | 0.51 | 2.63 | 4.07 | 6.03   | 9.43 |
| 0.11 | 1352.44 | 2192.47 | 3337.51 | 5400.37 | 0.52 | 2.37 | 3.67 | 5.39   | 8.32 |
| 0.12 | 981.95  | 1591.71 | 2407.62 | 3869.73 | 0.53 | 2.12 | 3.29 | 4.86   | 7.60 |
| 0.13 | 733.90  | 1187.53 | 1808.48 | 2899.69 | 0.54 | 1.91 | 2.96 | 4.36   | 6.71 |
| 0.14 | 559.23  | 914.33  | 1372.57 | 2201.53 | 0.55 | 1.74 | 2.67 | 3.92   | 6.09 |
| 0.15 | 437.17  | 703.38  | 1081.80 | 1713.18 | 0.56 | 1.58 | 2.42 | 3.51   | 5.38 |
| 0.16 | 343.64  | 555.86  | 839.63  | 1317.73 | 0.57 | 1.43 | 2.18 | 3.13   | 4.81 |
| 0.17 | 274.53  | 442.79  | 668.90  | 1091.14 | 0.58 | 1.28 | 1.97 | 2.83   | 4.39 |
| 0.18 | 218.60  | 359.20  | 542.56  | 880.04  | 0.59 | 1.16 | 1.78 | 2.54   | 3.88 |
| 0.19 | 179.45  | 289.56  | 435.58  | 698.37  | 0.60 | 1.04 | 1.59 | 2.27   | 3.49 |
| 0.20 | 147.06  | 236.62  | 361.21  | 576.41  | 0.61 | 0.94 | 1.43 | 2.02   | 3.11 |
| 0.21 | 123.00  | 196.49  | 295.97  | 470.15  | 0.62 | 0.84 | 1.28 | 1.82   | 2.76 |
| 0.22 | 102.69  | 164.47  | 250.16  | 402.07  | 0.63 | 0.76 | 1.14 | 1.63   | 2.46 |
| 0.23 | 87.03   | 139.59  | 210.38  | 336.91  | 0.64 | 0.69 | 1.03 | 1.46   | 2.16 |
| 0.24 | 73.05   | 117.85  | 176.51  | 283.06  | 0.65 | 0.61 | 0.92 | 1.30   | 1.97 |
| 0.25 | 62.46   | 101.21  | 150.70  | 238.62  | 0.66 | 0.56 | 0.83 | 1.16   | 1.73 |
| 0.26 | 53.45   | 85.73   | 129.06  | 204.04  | 0.67 | 0.50 | 0.75 | 1.05   | 1.55 |
| 0.27 | 46.02   | 73.59   | 110.60  | 176.22  | 0.68 | 0.45 | 0.67 | 0.94   | 1.37 |
| 0.28 | 39.74   | 63.74   | 95.40   | 151.09  | 0.69 | 0.40 | 0.61 | 0.85   | 1.22 |
| 0.29 | 34.58   | 55.55   | 83.57   | 130.96  | 0.70 | 0.36 | 0.54 | 0.75   | 1.08 |
| 0.30 | 29.99   | 48.19   | 72.58   | 112.35  | 0.71 | 0.32 | 0.48 | 0.67   | 0.97 |
| 0.31 | 26.28   | 42.35   | 64.08   | 100.67  | 0.72 | 0.29 | 0.43 | 0.59   | 0.86 |
| 0.32 | 22.98   | 37.07   | 55.74   | 87.46   | 0.73 | 0.26 | 0.38 | 0.53   | 0.76 |
| 0.33 | 20.21   | 32.38   | 48.13   | 76.39   | 0.74 | 0.23 | 0.34 | 0.47   | 0.66 |
| 0.34 | 17.70   | 28.34   | 41.93   | 67.66   | 0.75 | 0.21 | 0.30 | 0.41   | 0.59 |
| 0.35 | 15.66   | 25.05   | 37.23   | 60.87   | 0.76 | 0.18 | 0.27 | 0.37   | 0.52 |
| 0.36 | 13.85   | 22.12   | 32.84   | 52.89   | 0.77 | 0.16 | 0.24 | 0.32   | 0.46 |
| 0.37 | 12.30   | 19.43   | 29.02   | 46.23   | 0.78 | 0.14 | 0.21 | 0.28   | 0.40 |
| 0.38 | 10.94   | 17.29   | 25.91   | 40.77   | 0.79 | 0.13 | 0.18 | 0.25   | 0.34 |
| 0.39 | 9.78    | 15.28   | 22.91   | 36.45   | 0.80 | 0.11 | 0.16 | 0.21   | 0.30 |
| 0.40 | 8.64    | 13.59   | 20.26   | 32.29   | 0.81 | 0.10 | 0.14 | 0.18   | 0.26 |
| 0.41 | 7.72    | 12.23   | 18.08   | 28.73   | 0.82 | 0.08 | 0.12 | 0.16   | 0.22 |
| 0.42 | 6.89    | 10.86   | 16.23   | 25.46   | 0.83 | 0.07 | 0.10 | 0.14   | 0.19 |
| 0.43 | 6.20    | 9.72    | 14.48   | 22.81   | 0.84 | 0.06 | 0.09 | 0.12   | 0.16 |
| 0.44 | 5.58    | 8.81    | 13.07   | 20.19   | 0.85 | 0.05 | 0.07 | 0.10   | 0.13 |
| 0.45 | 4.99    | 7.83    | 11.59   | 18.37   | 0.86 | 0.04 | 0.06 | 0.08   | 0.11 |
| 0.46 | 4.46    | 7.01    | 10.37   | 16.05   | 0.87 | 0.04 | 0.05 | 0.07   | 0.09 |
| 0.47 | 4.00    | 6.28    | 9.34    | 14.66   | 0.88 | 0.03 | 0.04 | 0.06   | 0.07 |
| 0.48 | 3.59    | 5.60    | 8.28    | 13.08   | 0.89 | 0.03 | 0.04 | 0.05   | 0.06 |
| 0.49 | 3.24    | 5.00    | 7.38    | 11.47   | 0.90 | 0.02 | 0.03 | 0.04   | 0.05 |
| 0.50 | 2.92    | 4.55    | 6.62    | 10.33   |      |      |      |        |      |

Table S168: Critical values for detector  $\hat{H}_{mov}^{m,0.1}$  with windows size  $n = 0.1$ , and FM-OLS and D-OLS estimation in a model with intercept and linear trend. The number of integrated regressors is 1 and the highest power of  $x_{kt}$  is 1.

| m    | 90 %    | 95 %    | 97,5 %  | 99 %     | m    | 90 % | 95 % | 97,5 % | 99 %  |
|------|---------|---------|---------|----------|------|------|------|--------|-------|
| 0.10 | 3401.63 | 5921.01 | 9531.74 | 16261.06 | 0.51 | 4.59 | 7.67 | 12.13  | 20.23 |
| 0.11 | 2412.93 | 4181.42 | 6752.79 | 11778.93 | 0.52 | 4.17 | 6.90 | 10.86  | 17.99 |
| 0.12 | 1748.97 | 3035.91 | 4954.71 | 8484.38  | 0.53 | 3.74 | 6.22 | 9.67   | 15.99 |
| 0.13 | 1301.93 | 2247.67 | 3657.54 | 6251.35  | 0.54 | 3.38 | 5.59 | 8.62   | 14.52 |
| 0.14 | 998.15  | 1726.96 | 2764.47 | 4783.52  | 0.55 | 3.04 | 5.02 | 7.77   | 13.15 |
| 0.15 | 777.58  | 1344.45 | 2112.64 | 3649.33  | 0.56 | 2.74 | 4.52 | 7.06   | 11.77 |
| 0.16 | 612.44  | 1062.06 | 1697.96 | 2848.66  | 0.57 | 2.48 | 4.10 | 6.37   | 10.62 |
| 0.17 | 485.35  | 841.10  | 1355.15 | 2294.72  | 0.58 | 2.24 | 3.68 | 5.75   | 9.49  |
| 0.18 | 391.42  | 681.77  | 1108.32 | 1889.12  | 0.59 | 2.04 | 3.34 | 5.14   | 8.54  |
| 0.19 | 318.65  | 553.81  | 899.47  | 1536.70  | 0.60 | 1.84 | 3.00 | 4.61   | 7.73  |
| 0.20 | 261.42  | 456.77  | 745.05  | 1287.04  | 0.61 | 1.67 | 2.70 | 4.11   | 6.90  |
| 0.21 | 217.10  | 377.12  | 614.29  | 1045.17  | 0.62 | 1.50 | 2.42 | 3.68   | 6.24  |
| 0.22 | 183.32  | 315.21  | 509.53  | 871.80   | 0.63 | 1.35 | 2.19 | 3.30   | 5.57  |
| 0.23 | 153.88  | 265.30  | 426.92  | 718.90   | 0.64 | 1.22 | 1.96 | 2.98   | 4.94  |
| 0.24 | 130.01  | 223.51  | 355.68  | 603.16   | 0.65 | 1.11 | 1.76 | 2.68   | 4.35  |
| 0.25 | 110.16  | 188.73  | 302.18  | 518.92   | 0.66 | 1.00 | 1.58 | 2.38   | 3.85  |
| 0.26 | 94.10   | 161.68  | 254.80  | 440.04   | 0.67 | 0.91 | 1.41 | 2.12   | 3.44  |
| 0.27 | 80.73   | 138.46  | 218.33  | 372.31   | 0.68 | 0.82 | 1.27 | 1.91   | 3.06  |
| 0.28 | 69.85   | 118.63  | 191.48  | 322.89   | 0.69 | 0.73 | 1.15 | 1.70   | 2.72  |
| 0.29 | 60.36   | 102.90  | 165.13  | 285.01   | 0.70 | 0.66 | 1.03 | 1.52   | 2.40  |
| 0.30 | 52.24   | 89.98   | 144.73  | 247.49   | 0.71 | 0.60 | 0.92 | 1.36   | 2.14  |
| 0.31 | 45.74   | 78.90   | 125.73  | 217.82   | 0.72 | 0.53 | 0.83 | 1.20   | 1.89  |
| 0.32 | 40.38   | 68.87   | 109.90  | 187.24   | 0.73 | 0.48 | 0.74 | 1.07   | 1.66  |
| 0.33 | 35.46   | 60.06   | 96.53   | 162.55   | 0.74 | 0.43 | 0.66 | 0.96   | 1.47  |
| 0.34 | 31.10   | 52.96   | 82.95   | 142.96   | 0.75 | 0.39 | 0.59 | 0.85   | 1.30  |
| 0.35 | 27.48   | 46.30   | 73.10   | 125.13   | 0.76 | 0.35 | 0.53 | 0.75   | 1.14  |
| 0.36 | 24.28   | 41.03   | 65.05   | 109.75   | 0.77 | 0.31 | 0.47 | 0.66   | 1.01  |
| 0.37 | 21.49   | 36.36   | 57.42   | 98.08    | 0.78 | 0.28 | 0.42 | 0.59   | 0.88  |
| 0.38 | 19.05   | 32.28   | 51.26   | 87.36    | 0.79 | 0.24 | 0.37 | 0.52   | 0.77  |
| 0.39 | 16.97   | 28.66   | 45.32   | 77.38    | 0.80 | 0.22 | 0.33 | 0.46   | 0.68  |
| 0.40 | 15.23   | 25.49   | 39.84   | 67.26    | 0.81 | 0.19 | 0.29 | 0.40   | 0.59  |
| 0.41 | 13.59   | 22.66   | 35.52   | 60.15    | 0.82 | 0.17 | 0.25 | 0.35   | 0.51  |
| 0.42 | 12.12   | 20.28   | 31.69   | 53.65    | 0.83 | 0.15 | 0.22 | 0.30   | 0.45  |
| 0.43 | 10.88   | 18.25   | 28.52   | 48.04    | 0.84 | 0.13 | 0.19 | 0.27   | 0.38  |
| 0.44 | 9.73    | 16.41   | 25.62   | 42.51    | 0.85 | 0.11 | 0.17 | 0.23   | 0.33  |
| 0.45 | 8.72    | 14.65   | 23.08   | 38.25    | 0.86 | 0.10 | 0.15 | 0.20   | 0.28  |
| 0.46 | 7.82    | 13.18   | 20.78   | 34.63    | 0.87 | 0.09 | 0.13 | 0.17   | 0.24  |
| 0.47 | 7.04    | 11.85   | 18.68   | 31.32    | 0.88 | 0.07 | 0.11 | 0.15   | 0.20  |
| 0.48 | 6.29    | 10.67   | 16.81   | 28.20    | 0.89 | 0.06 | 0.09 | 0.12   | 0.17  |
| 0.49 | 5.69    | 9.56    | 15.00   | 25.47    | 0.90 | 0.05 | 0.08 | 0.10   | 0.14  |
| 0.50 | 5.10    | 8.59    | 13.50   | 22.67    |      |      |      |        |       |

Table S169: Critical values for detector  $\hat{H}_{mov}^{m,0.1}$  with windows size  $n = 0.1$ , and IM-OLS estimation in a model with intercept and linear trend. The number of integrated regressors is 1 and the highest power of  $x_{kt}$  is 1.

| m    | 90 %    | 95 %    | 97,5 %  | 99 %     | m    | 90 % | 95 % | 97,5 % | 99 %  |
|------|---------|---------|---------|----------|------|------|------|--------|-------|
| 0.10 | 2637.58 | 4293.90 | 6615.90 | 10587.33 | 0.51 | 3.83 | 5.95 | 8.78   | 13.71 |
| 0.11 | 1875.02 | 3085.88 | 4741.76 | 7612.08  | 0.52 | 3.44 | 5.32 | 7.87   | 12.09 |
| 0.12 | 1380.15 | 2248.26 | 3447.79 | 5526.94  | 0.53 | 3.07 | 4.78 | 7.04   | 11.00 |
| 0.13 | 1043.77 | 1697.59 | 2611.91 | 4171.80  | 0.54 | 2.76 | 4.29 | 6.28   | 9.60  |
| 0.14 | 794.71  | 1316.55 | 1991.39 | 3204.03  | 0.55 | 2.50 | 3.84 | 5.61   | 8.67  |
| 0.15 | 629.21  | 1025.08 | 1592.38 | 2518.98  | 0.56 | 2.26 | 3.46 | 5.03   | 7.67  |
| 0.16 | 497.98  | 816.47  | 1240.15 | 1965.37  | 0.57 | 2.03 | 3.11 | 4.45   | 6.78  |
| 0.17 | 401.47  | 652.48  | 997.77  | 1622.64  | 0.58 | 1.83 | 2.80 | 3.99   | 6.16  |
| 0.18 | 319.78  | 531.94  | 806.60  | 1319.42  | 0.59 | 1.64 | 2.51 | 3.59   | 5.46  |
| 0.19 | 264.50  | 430.78  | 653.83  | 1061.72  | 0.60 | 1.47 | 2.23 | 3.19   | 4.87  |
| 0.20 | 217.38  | 353.89  | 541.54  | 876.72   | 0.61 | 1.31 | 2.00 | 2.82   | 4.27  |
| 0.21 | 183.25  | 295.25  | 447.34  | 716.78   | 0.62 | 1.17 | 1.78 | 2.53   | 3.78  |
| 0.22 | 153.12  | 247.46  | 378.19  | 613.13   | 0.63 | 1.05 | 1.58 | 2.26   | 3.36  |
| 0.23 | 130.15  | 209.54  | 319.37  | 514.48   | 0.64 | 0.94 | 1.42 | 2.00   | 2.95  |
| 0.24 | 109.58  | 177.46  | 268.26  | 435.14   | 0.65 | 0.84 | 1.26 | 1.77   | 2.64  |
| 0.25 | 93.99   | 153.35  | 229.20  | 364.36   | 0.66 | 0.75 | 1.12 | 1.57   | 2.31  |
| 0.26 | 80.56   | 130.12  | 196.73  | 312.75   | 0.67 | 0.67 | 1.01 | 1.41   | 2.07  |
| 0.27 | 69.33   | 111.73  | 167.73  | 270.00   | 0.68 | 0.60 | 0.90 | 1.26   | 1.80  |
| 0.28 | 59.86   | 96.93   | 145.60  | 231.69   | 0.69 | 0.54 | 0.80 | 1.12   | 1.61  |
| 0.29 | 52.23   | 84.48   | 127.97  | 201.01   | 0.70 | 0.48 | 0.70 | 0.98   | 1.40  |
| 0.30 | 45.36   | 73.36   | 110.86  | 172.16   | 0.71 | 0.42 | 0.63 | 0.86   | 1.24  |
| 0.31 | 39.74   | 64.21   | 97.82   | 153.75   | 0.72 | 0.38 | 0.55 | 0.76   | 1.10  |
| 0.32 | 34.85   | 56.09   | 84.93   | 133.75   | 0.73 | 0.33 | 0.49 | 0.66   | 0.96  |
| 0.33 | 30.45   | 49.07   | 73.27   | 116.68   | 0.74 | 0.29 | 0.43 | 0.59   | 0.83  |
| 0.34 | 26.70   | 42.93   | 63.94   | 103.28   | 0.75 | 0.26 | 0.37 | 0.51   | 0.72  |
| 0.35 | 23.57   | 37.94   | 56.75   | 92.05    | 0.76 | 0.23 | 0.33 | 0.44   | 0.63  |
| 0.36 | 20.86   | 33.45   | 49.84   | 80.67    | 0.77 | 0.20 | 0.29 | 0.39   | 0.54  |
| 0.37 | 18.50   | 29.31   | 43.89   | 70.33    | 0.78 | 0.17 | 0.25 | 0.33   | 0.47  |
| 0.38 | 16.38   | 26.04   | 39.25   | 61.85    | 0.79 | 0.15 | 0.21 | 0.28   | 0.40  |
| 0.39 | 14.66   | 23.05   | 34.59   | 54.93    | 0.80 | 0.13 | 0.18 | 0.24   | 0.34  |
| 0.40 | 12.91   | 20.43   | 30.52   | 48.62    | 0.81 | 0.12 | 0.16 | 0.21   | 0.29  |
| 0.41 | 11.49   | 18.35   | 27.13   | 42.91    | 0.82 | 0.10 | 0.14 | 0.18   | 0.25  |
| 0.42 | 10.26   | 16.24   | 24.37   | 38.11    | 0.83 | 0.09 | 0.12 | 0.15   | 0.21  |
| 0.43 | 9.21    | 14.52   | 21.64   | 33.98    | 0.84 | 0.08 | 0.10 | 0.13   | 0.18  |
| 0.44 | 8.28    | 13.10   | 19.43   | 29.95    | 0.85 | 0.07 | 0.09 | 0.11   | 0.15  |
| 0.45 | 7.40    | 11.61   | 17.26   | 27.25    | 0.86 | 0.06 | 0.08 | 0.10   | 0.13  |
| 0.46 | 6.60    | 10.40   | 15.31   | 23.84    | 0.87 | 0.05 | 0.07 | 0.08   | 0.11  |
| 0.47 | 5.88    | 9.29    | 13.74   | 21.72    | 0.88 | 0.05 | 0.06 | 0.07   | 0.09  |
| 0.48 | 5.28    | 8.24    | 12.24   | 19.20    | 0.89 | 0.04 | 0.05 | 0.07   | 0.08  |
| 0.49 | 4.74    | 7.34    | 10.88   | 16.88    | 0.90 | 0.04 | 0.05 | 0.06   | 0.08  |
| 0.50 | 4.28    | 6.67    | 9.65    | 15.15    |      |      |      |        |       |

Table S170: Critical values for detector  $\hat{H}_{mov}^{m,0.2}$  with windows size  $n = 0.2$ , and FM-OLS and D-OLS estimation in a model with intercept and linear trend. The number of integrated regressors is 1 and the highest power of  $x_{kt}$  is 1.

| m    | 90 %    | 95 %    | 97,5 %   | 99 %     | m    | 90 % | 95 %  | 97,5 % | 99 %  |
|------|---------|---------|----------|----------|------|------|-------|--------|-------|
| 0.10 | 4639.76 | 8104.66 | 13153.65 | 22673.91 | 0.51 | 6.70 | 11.17 | 17.73  | 29.49 |
| 0.11 | 3323.25 | 5849.62 | 9425.52  | 16517.50 | 0.52 | 6.05 | 10.04 | 15.74  | 26.16 |
| 0.12 | 2439.16 | 4287.04 | 7000.71  | 12090.84 | 0.53 | 5.44 | 9.02  | 13.98  | 23.19 |
| 0.13 | 1823.70 | 3193.71 | 5295.91  | 8936.21  | 0.54 | 4.89 | 8.10  | 12.48  | 20.74 |
| 0.14 | 1414.66 | 2488.47 | 4005.44  | 6933.26  | 0.55 | 4.38 | 7.24  | 11.17  | 18.73 |
| 0.15 | 1113.82 | 1945.50 | 3104.75  | 5385.00  | 0.56 | 3.94 | 6.54  | 10.09  | 16.72 |
| 0.16 | 881.36  | 1547.20 | 2486.02  | 4225.77  | 0.57 | 3.55 | 5.85  | 9.07   | 15.09 |
| 0.17 | 701.70  | 1233.38 | 1994.99  | 3436.34  | 0.58 | 3.20 | 5.24  | 8.15   | 13.44 |
| 0.18 | 572.44  | 1005.42 | 1638.78  | 2816.96  | 0.59 | 2.89 | 4.73  | 7.28   | 11.94 |
| 0.19 | 467.94  | 820.28  | 1337.67  | 2322.58  | 0.60 | 2.61 | 4.24  | 6.47   | 10.75 |
| 0.20 | 384.35  | 677.87  | 1114.60  | 1914.53  | 0.61 | 2.35 | 3.80  | 5.76   | 9.57  |
| 0.21 | 322.07  | 562.53  | 921.82   | 1579.48  | 0.62 | 2.10 | 3.39  | 5.12   | 8.61  |
| 0.22 | 271.02  | 469.65  | 764.68   | 1325.79  | 0.63 | 1.89 | 3.04  | 4.55   | 7.66  |
| 0.23 | 228.60  | 398.70  | 641.34   | 1100.33  | 0.64 | 1.70 | 2.70  | 4.07   | 6.78  |
| 0.24 | 193.53  | 335.58  | 536.02   | 915.66   | 0.65 | 1.53 | 2.42  | 3.65   | 5.95  |
| 0.25 | 164.97  | 283.45  | 454.33   | 788.44   | 0.66 | 1.38 | 2.16  | 3.24   | 5.19  |
| 0.26 | 140.77  | 243.43  | 386.14   | 673.52   | 0.67 | 1.24 | 1.92  | 2.86   | 4.61  |
| 0.27 | 120.99  | 208.87  | 329.98   | 570.95   | 0.68 | 1.11 | 1.72  | 2.57   | 4.06  |
| 0.28 | 104.71  | 179.77  | 289.84   | 491.00   | 0.69 | 0.99 | 1.55  | 2.27   | 3.60  |
| 0.29 | 90.66   | 155.28  | 250.43   | 434.53   | 0.70 | 0.89 | 1.37  | 2.01   | 3.14  |
| 0.30 | 78.71   | 135.46  | 219.37   | 375.82   | 0.71 | 0.79 | 1.23  | 1.78   | 2.76  |
| 0.31 | 68.75   | 119.20  | 190.75   | 331.01   | 0.72 | 0.70 | 1.09  | 1.57   | 2.43  |
| 0.32 | 60.63   | 103.95  | 166.50   | 285.40   | 0.73 | 0.63 | 0.96  | 1.39   | 2.15  |
| 0.33 | 53.19   | 90.82   | 145.75   | 247.40   | 0.74 | 0.56 | 0.85  | 1.23   | 1.87  |
| 0.34 | 46.77   | 79.86   | 125.52   | 216.66   | 0.75 | 0.49 | 0.75  | 1.07   | 1.64  |
| 0.35 | 41.20   | 70.05   | 110.38   | 190.66   | 0.76 | 0.44 | 0.67  | 0.94   | 1.42  |
| 0.36 | 36.37   | 61.76   | 97.90    | 166.16   | 0.77 | 0.39 | 0.59  | 0.82   | 1.24  |
| 0.37 | 32.25   | 54.73   | 86.93    | 149.11   | 0.78 | 0.34 | 0.51  | 0.72   | 1.07  |
| 0.38 | 28.57   | 48.54   | 77.47    | 132.41   | 0.79 | 0.30 | 0.45  | 0.63   | 0.92  |
| 0.39 | 25.37   | 43.00   | 68.38    | 116.50   | 0.80 | 0.26 | 0.39  | 0.55   | 0.80  |
| 0.40 | 22.74   | 38.25   | 59.74    | 101.51   | 0.81 | 0.23 | 0.34  | 0.47   | 0.69  |
| 0.41 | 20.22   | 33.99   | 53.25    | 90.04    | 0.82 | 0.20 | 0.29  | 0.41   | 0.59  |
| 0.42 | 18.04   | 30.31   | 47.59    | 80.35    | 0.83 | 0.17 | 0.25  | 0.35   | 0.51  |
| 0.43 | 16.19   | 27.20   | 42.60    | 72.29    | 0.84 | 0.15 | 0.22  | 0.30   | 0.43  |
| 0.44 | 14.46   | 24.38   | 38.01    | 63.74    | 0.85 | 0.13 | 0.19  | 0.26   | 0.36  |
| 0.45 | 12.94   | 21.80   | 34.40    | 56.84    | 0.86 | 0.11 | 0.16  | 0.22   | 0.31  |
| 0.46 | 11.57   | 19.48   | 30.78    | 51.29    | 0.87 | 0.09 | 0.14  | 0.19   | 0.26  |
| 0.47 | 10.38   | 17.53   | 27.66    | 46.15    | 0.88 | 0.08 | 0.12  | 0.16   | 0.22  |
| 0.48 | 9.26    | 15.75   | 24.81    | 41.59    | 0.89 | 0.07 | 0.10  | 0.13   | 0.18  |
| 0.49 | 8.34    | 14.00   | 22.08    | 37.28    | 0.90 | 0.06 | 0.08  | 0.11   | 0.15  |
| 0.50 | 7.47    | 12.56   | 19.73    | 33.20    |      |      |       |        |       |

Table S171: Critical values for detector  $\hat{H}_{mov}^{m,0.2}$  with windows size  $n = 0.2$ , and IM-OLS estimation in a model with intercept and linear trend. The number of integrated regressors is 1 and the highest power of  $x_{kt}$  is 1.

| m    | 90 %    | 95 %    | 97,5 %  | 99 %     | m    | 90 % | 95 % | 97,5 % | 99 %  |
|------|---------|---------|---------|----------|------|------|------|--------|-------|
| 0.10 | 2987.74 | 4875.92 | 7550.22 | 12166.56 | 0.51 | 4.30 | 6.68 | 9.80   | 15.27 |
| 0.11 | 2134.31 | 3529.47 | 5430.65 | 8812.96  | 0.52 | 3.85 | 5.95 | 8.76   | 13.45 |
| 0.12 | 1580.36 | 2588.16 | 3976.91 | 6414.72  | 0.53 | 3.42 | 5.33 | 7.85   | 12.17 |
| 0.13 | 1197.65 | 1968.88 | 3023.55 | 4842.68  | 0.54 | 3.06 | 4.76 | 6.96   | 10.62 |
| 0.14 | 914.95  | 1527.79 | 2321.92 | 3746.61  | 0.55 | 2.77 | 4.26 | 6.18   | 9.50  |
| 0.15 | 728.30  | 1188.23 | 1845.79 | 2941.38  | 0.56 | 2.49 | 3.82 | 5.52   | 8.40  |
| 0.16 | 576.61  | 949.19  | 1452.52 | 2312.57  | 0.57 | 2.24 | 3.42 | 4.87   | 7.39  |
| 0.17 | 466.40  | 762.06  | 1165.24 | 1903.06  | 0.58 | 2.00 | 3.07 | 4.35   | 6.67  |
| 0.18 | 371.48  | 620.45  | 942.15  | 1550.13  | 0.59 | 1.79 | 2.74 | 3.89   | 5.90  |
| 0.19 | 308.34  | 502.98  | 768.05  | 1259.17  | 0.60 | 1.59 | 2.43 | 3.44   | 5.25  |
| 0.20 | 254.00  | 414.21  | 636.78  | 1034.86  | 0.61 | 1.42 | 2.16 | 3.03   | 4.58  |
| 0.21 | 213.93  | 344.90  | 528.39  | 846.51   | 0.62 | 1.26 | 1.92 | 2.72   | 4.05  |
| 0.22 | 178.92  | 289.34  | 444.45  | 722.31   | 0.63 | 1.13 | 1.70 | 2.42   | 3.58  |
| 0.23 | 152.34  | 245.83  | 375.94  | 605.91   | 0.64 | 1.01 | 1.51 | 2.12   | 3.11  |
| 0.24 | 128.22  | 207.66  | 315.10  | 512.43   | 0.65 | 0.89 | 1.34 | 1.87   | 2.77  |
| 0.25 | 109.84  | 179.10  | 269.35  | 429.66   | 0.66 | 0.80 | 1.19 | 1.65   | 2.42  |
| 0.26 | 94.12   | 151.73  | 230.66  | 367.24   | 0.67 | 0.71 | 1.06 | 1.48   | 2.16  |
| 0.27 | 81.09   | 130.85  | 196.87  | 318.68   | 0.68 | 0.63 | 0.94 | 1.31   | 1.87  |
| 0.28 | 69.95   | 113.55  | 170.42  | 271.64   | 0.69 | 0.56 | 0.84 | 1.16   | 1.67  |
| 0.29 | 60.89   | 98.77   | 149.94  | 236.27   | 0.70 | 0.49 | 0.73 | 1.01   | 1.44  |
| 0.30 | 52.90   | 85.58   | 129.56  | 201.60   | 0.71 | 0.44 | 0.65 | 0.89   | 1.27  |
| 0.31 | 46.16   | 74.76   | 114.40  | 179.62   | 0.72 | 0.39 | 0.56 | 0.78   | 1.12  |
| 0.32 | 40.56   | 65.27   | 98.98   | 156.31   | 0.73 | 0.34 | 0.50 | 0.67   | 0.97  |
| 0.33 | 35.40   | 57.06   | 85.25   | 136.25   | 0.74 | 0.30 | 0.43 | 0.60   | 0.84  |
| 0.34 | 31.02   | 49.96   | 74.25   | 120.33   | 0.75 | 0.26 | 0.38 | 0.51   | 0.73  |
| 0.35 | 27.32   | 44.05   | 65.91   | 107.12   | 0.76 | 0.23 | 0.33 | 0.45   | 0.63  |
| 0.36 | 24.20   | 38.70   | 57.69   | 93.69    | 0.77 | 0.21 | 0.29 | 0.39   | 0.55  |
| 0.37 | 21.33   | 34.00   | 50.59   | 81.36    | 0.78 | 0.18 | 0.25 | 0.34   | 0.47  |
| 0.38 | 18.93   | 30.01   | 45.26   | 71.51    | 0.79 | 0.16 | 0.22 | 0.29   | 0.40  |
| 0.39 | 16.88   | 26.64   | 39.82   | 63.31    | 0.80 | 0.14 | 0.19 | 0.25   | 0.35  |
| 0.40 | 14.89   | 23.53   | 35.14   | 55.85    | 0.81 | 0.13 | 0.17 | 0.22   | 0.30  |
| 0.41 | 13.19   | 21.08   | 31.16   | 49.00    | 0.82 | 0.11 | 0.15 | 0.19   | 0.25  |
| 0.42 | 11.77   | 18.67   | 27.84   | 43.65    | 0.83 | 0.10 | 0.13 | 0.17   | 0.22  |
| 0.43 | 10.52   | 16.65   | 24.76   | 38.74    | 0.84 | 0.09 | 0.12 | 0.15   | 0.19  |
| 0.44 | 9.45    | 14.97   | 22.18   | 34.15    | 0.85 | 0.08 | 0.11 | 0.13   | 0.17  |
| 0.45 | 8.42    | 13.24   | 19.61   | 30.64    | 0.86 | 0.07 | 0.10 | 0.12   | 0.15  |
| 0.46 | 7.50    | 11.80   | 17.29   | 26.99    | 0.87 | 0.07 | 0.09 | 0.11   | 0.13  |
| 0.47 | 6.68    | 10.52   | 15.59   | 24.61    | 0.88 | 0.06 | 0.08 | 0.10   | 0.12  |
| 0.48 | 5.97    | 9.32    | 13.80   | 21.49    | 0.89 | 0.06 | 0.07 | 0.09   | 0.11  |
| 0.49 | 5.35    | 8.29    | 12.22   | 19.03    | 0.90 | 0.05 | 0.07 | 0.08   | 0.11  |
| 0.50 | 4.82    | 7.49    | 10.85   | 16.94    |      |      |      |        |       |

Table S172: Critical values for detector  $\hat{H}_{mov}^{m,0.3}$  with windows size  $n = 0.3$ , and FM-OLS and D-OLS estimation in a model with intercept and linear trend. The number of integrated regressors is 1 and the highest power of  $x_{kt}$  is 1.

| m    | 90 %    | 95 %    | 97,5 %   | 99 %     | m    | 90 % | 95 %  | 97,5 % | 99 %  |
|------|---------|---------|----------|----------|------|------|-------|--------|-------|
| 0.10 | 5257.63 | 9181.72 | 14986.46 | 25932.81 | 0.51 | 7.54 | 12.53 | 19.86  | 32.96 |
| 0.11 | 3769.45 | 6681.65 | 10828.04 | 18857.33 | 0.52 | 6.80 | 11.22 | 17.55  | 28.91 |
| 0.12 | 2779.96 | 4913.73 | 8026.70  | 14057.26 | 0.53 | 6.10 | 10.07 | 15.52  | 25.56 |
| 0.13 | 2082.61 | 3682.34 | 6086.41  | 10397.81 | 0.54 | 5.45 | 9.01  | 13.79  | 22.95 |
| 0.14 | 1617.67 | 2870.98 | 4620.67  | 7994.43  | 0.55 | 4.87 | 8.04  | 12.33  | 20.50 |
| 0.15 | 1277.20 | 2232.11 | 3612.21  | 6285.97  | 0.56 | 4.36 | 7.20  | 11.07  | 18.38 |
| 0.16 | 1015.60 | 1792.05 | 2892.73  | 4933.68  | 0.57 | 3.92 | 6.43  | 9.95   | 16.41 |
| 0.17 | 809.62  | 1427.79 | 2314.34  | 4002.36  | 0.58 | 3.52 | 5.75  | 8.88   | 14.70 |
| 0.18 | 660.94  | 1165.89 | 1909.99  | 3274.99  | 0.59 | 3.18 | 5.16  | 7.91   | 12.89 |
| 0.19 | 542.43  | 954.04  | 1551.84  | 2718.86  | 0.60 | 2.86 | 4.61  | 7.05   | 11.59 |
| 0.20 | 446.24  | 788.09  | 1298.62  | 2239.25  | 0.61 | 2.56 | 4.11  | 6.24   | 10.30 |
| 0.21 | 373.74  | 656.66  | 1079.46  | 1845.87  | 0.62 | 2.29 | 3.66  | 5.52   | 9.23  |
| 0.22 | 314.78  | 548.43  | 895.47   | 1553.50  | 0.63 | 2.04 | 3.27  | 4.90   | 8.19  |
| 0.23 | 265.94  | 463.48  | 751.48   | 1283.02  | 0.64 | 1.83 | 2.90  | 4.36   | 7.16  |
| 0.24 | 225.60  | 391.80  | 627.84   | 1077.97  | 0.65 | 1.64 | 2.59  | 3.88   | 6.28  |
| 0.25 | 191.80  | 331.02  | 530.35   | 926.63   | 0.66 | 1.47 | 2.30  | 3.43   | 5.47  |
| 0.26 | 163.68  | 283.55  | 450.86   | 790.75   | 0.67 | 1.32 | 2.03  | 3.02   | 4.82  |
| 0.27 | 140.82  | 243.26  | 386.38   | 671.54   | 0.68 | 1.17 | 1.82  | 2.69   | 4.23  |
| 0.28 | 121.63  | 209.12  | 338.61   | 578.54   | 0.69 | 1.05 | 1.62  | 2.37   | 3.75  |
| 0.29 | 105.44  | 180.85  | 292.50   | 511.01   | 0.70 | 0.93 | 1.44  | 2.10   | 3.26  |
| 0.30 | 91.58   | 158.18  | 256.21   | 440.75   | 0.71 | 0.83 | 1.27  | 1.84   | 2.86  |
| 0.31 | 79.64   | 138.64  | 223.70   | 385.87   | 0.72 | 0.73 | 1.13  | 1.62   | 2.50  |
| 0.32 | 70.32   | 120.86  | 194.13   | 331.08   | 0.73 | 0.65 | 0.99  | 1.42   | 2.19  |
| 0.33 | 61.66   | 105.56  | 169.39   | 286.86   | 0.74 | 0.57 | 0.87  | 1.26   | 1.91  |
| 0.34 | 54.14   | 92.85   | 146.05   | 252.59   | 0.75 | 0.51 | 0.77  | 1.10   | 1.66  |
| 0.35 | 47.71   | 80.88   | 128.51   | 221.99   | 0.76 | 0.45 | 0.68  | 0.96   | 1.43  |
| 0.36 | 42.13   | 71.36   | 113.57   | 192.70   | 0.77 | 0.39 | 0.60  | 0.84   | 1.25  |
| 0.37 | 37.29   | 63.26   | 100.18   | 171.65   | 0.78 | 0.35 | 0.52  | 0.73   | 1.08  |
| 0.38 | 32.93   | 56.00   | 89.20    | 152.62   | 0.79 | 0.30 | 0.46  | 0.63   | 0.93  |
| 0.39 | 29.24   | 49.62   | 78.96    | 134.96   | 0.80 | 0.27 | 0.40  | 0.55   | 0.81  |
| 0.40 | 26.13   | 44.09   | 68.71    | 117.03   | 0.81 | 0.23 | 0.34  | 0.48   | 0.69  |
| 0.41 | 23.22   | 39.09   | 61.12    | 103.11   | 0.82 | 0.20 | 0.30  | 0.41   | 0.59  |
| 0.42 | 20.66   | 34.80   | 54.40    | 91.92    | 0.83 | 0.18 | 0.26  | 0.35   | 0.51  |
| 0.43 | 18.52   | 31.13   | 48.66    | 82.79    | 0.84 | 0.15 | 0.22  | 0.30   | 0.43  |
| 0.44 | 16.46   | 27.86   | 43.26    | 72.73    | 0.85 | 0.13 | 0.19  | 0.26   | 0.37  |
| 0.45 | 14.74   | 24.89   | 39.07    | 64.73    | 0.86 | 0.11 | 0.17  | 0.22   | 0.31  |
| 0.46 | 13.15   | 22.13   | 34.77    | 57.82    | 0.87 | 0.10 | 0.14  | 0.19   | 0.26  |
| 0.47 | 11.77   | 19.84   | 31.24    | 52.35    | 0.88 | 0.08 | 0.12  | 0.16   | 0.22  |
| 0.48 | 10.49   | 17.79   | 28.15    | 46.78    | 0.89 | 0.07 | 0.10  | 0.14   | 0.18  |
| 0.49 | 9.44    | 15.73   | 24.89    | 41.65    | 0.90 | 0.06 | 0.09  | 0.11   | 0.16  |
| 0.50 | 8.42    | 14.10   | 22.12    | 37.05    |      |      |       |        |       |

Table S173: Critical values for detector  $\hat{H}_{mov}^{m,0.3}$  with windows size  $n = 0.3$ , and IM-OLS estimation in a model with intercept and linear trend. The number of integrated regressors is 1 and the highest power of  $x_{kt}$  is 1.

| m    | 90 %    | 95 %     | 97,5 %   | 99 %     | m    | 90 % | 95 %  | 97,5 % | 99 %  |
|------|---------|----------|----------|----------|------|------|-------|--------|-------|
| 0.10 | 6056.63 | 15674.57 | 35210.11 | 83504.03 | 0.51 | 5.09 | 12.88 | 27.00  | 64.27 |
| 0.11 | 4318.65 | 11333.25 | 25502.15 | 60905.79 | 0.52 | 4.48 | 11.30 | 23.86  | 55.55 |
| 0.12 | 3184.27 | 8399.53  | 18771.06 | 45343.36 | 0.53 | 3.94 | 9.87  | 20.69  | 48.12 |
| 0.13 | 2368.37 | 6206.21  | 14021.55 | 33837.33 | 0.54 | 3.50 | 8.68  | 18.35  | 42.81 |
| 0.14 | 1827.09 | 4745.22  | 10507.58 | 26005.60 | 0.55 | 3.09 | 7.65  | 16.26  | 36.88 |
| 0.15 | 1406.93 | 3713.73  | 8280.85  | 19938.91 | 0.56 | 2.76 | 6.75  | 14.29  | 32.46 |
| 0.16 | 1117.27 | 2909.38  | 6430.41  | 15459.16 | 0.57 | 2.41 | 6.01  | 12.64  | 28.63 |
| 0.17 | 884.80  | 2295.10  | 5014.41  | 12053.93 | 0.58 | 2.13 | 5.29  | 11.09  | 25.34 |
| 0.18 | 720.73  | 1874.78  | 4084.16  | 9538.85  | 0.59 | 1.89 | 4.67  | 9.58   | 22.13 |
| 0.19 | 575.14  | 1518.08  | 3311.34  | 7764.85  | 0.60 | 1.68 | 4.02  | 8.45   | 19.52 |
| 0.20 | 467.69  | 1242.53  | 2701.87  | 6396.62  | 0.61 | 1.48 | 3.54  | 7.39   | 16.91 |
| 0.21 | 379.45  | 1001.56  | 2219.53  | 5342.23  | 0.62 | 1.30 | 3.05  | 6.36   | 14.73 |
| 0.22 | 318.08  | 830.15   | 1848.06  | 4399.26  | 0.63 | 1.14 | 2.67  | 5.65   | 12.68 |
| 0.23 | 263.12  | 693.51   | 1556.15  | 3685.57  | 0.64 | 0.99 | 2.34  | 4.82   | 10.74 |
| 0.24 | 222.87  | 588.96   | 1300.93  | 3102.41  | 0.65 | 0.88 | 2.03  | 4.25   | 9.37  |
| 0.25 | 187.33  | 493.45   | 1098.07  | 2630.51  | 0.66 | 0.77 | 1.78  | 3.60   | 7.99  |
| 0.26 | 158.52  | 412.24   | 925.81   | 2260.07  | 0.67 | 0.67 | 1.54  | 3.07   | 6.68  |
| 0.27 | 136.68  | 349.91   | 774.63   | 1899.81  | 0.68 | 0.59 | 1.34  | 2.65   | 5.58  |
| 0.28 | 116.05  | 298.55   | 656.77   | 1603.42  | 0.69 | 0.52 | 1.15  | 2.29   | 4.80  |
| 0.29 | 99.64   | 256.39   | 556.98   | 1334.23  | 0.70 | 0.45 | 1.02  | 1.98   | 4.04  |
| 0.30 | 85.44   | 220.42   | 480.48   | 1165.85  | 0.71 | 0.40 | 0.87  | 1.69   | 3.47  |
| 0.31 | 73.31   | 189.43   | 415.45   | 1007.25  | 0.72 | 0.35 | 0.75  | 1.44   | 3.01  |
| 0.32 | 62.57   | 161.00   | 355.26   | 860.10   | 0.73 | 0.31 | 0.65  | 1.26   | 2.59  |
| 0.33 | 54.35   | 139.40   | 309.38   | 738.80   | 0.74 | 0.27 | 0.56  | 1.09   | 2.21  |
| 0.34 | 46.94   | 121.07   | 266.50   | 641.93   | 0.75 | 0.23 | 0.48  | 0.92   | 1.84  |
| 0.35 | 40.58   | 104.55   | 227.03   | 547.11   | 0.76 | 0.21 | 0.41  | 0.78   | 1.59  |
| 0.36 | 35.57   | 90.31    | 196.85   | 469.87   | 0.77 | 0.18 | 0.35  | 0.66   | 1.36  |
| 0.37 | 30.78   | 79.99    | 171.74   | 417.36   | 0.78 | 0.16 | 0.30  | 0.55   | 1.10  |
| 0.38 | 26.71   | 70.46    | 150.41   | 361.36   | 0.79 | 0.14 | 0.26  | 0.45   | 0.89  |
| 0.39 | 23.44   | 61.28    | 131.76   | 319.54   | 0.80 | 0.12 | 0.22  | 0.38   | 0.74  |
| 0.40 | 20.46   | 53.34    | 113.87   | 274.96   | 0.81 | 0.10 | 0.18  | 0.32   | 0.60  |
| 0.41 | 17.97   | 46.58    | 100.99   | 237.23   | 0.82 | 0.09 | 0.15  | 0.27   | 0.49  |
| 0.42 | 15.87   | 41.26    | 88.59    | 210.43   | 0.83 | 0.08 | 0.13  | 0.21   | 0.39  |
| 0.43 | 14.03   | 35.74    | 77.08    | 181.37   | 0.84 | 0.06 | 0.11  | 0.17   | 0.32  |
| 0.44 | 12.14   | 31.30    | 68.00    | 160.87   | 0.85 | 0.05 | 0.09  | 0.14   | 0.25  |
| 0.45 | 10.86   | 27.47    | 60.07    | 140.99   | 0.86 | 0.05 | 0.07  | 0.11   | 0.19  |
| 0.46 | 9.51    | 24.25    | 53.82    | 122.14   | 0.87 | 0.04 | 0.06  | 0.09   | 0.15  |
| 0.47 | 8.41    | 21.40    | 46.35    | 108.26   | 0.88 | 0.03 | 0.05  | 0.07   | 0.12  |
| 0.48 | 7.38    | 18.85    | 40.82    | 93.02    | 0.89 | 0.03 | 0.04  | 0.06   | 0.09  |
| 0.49 | 6.59    | 16.81    | 35.83    | 82.83    | 0.90 | 0.02 | 0.03  | 0.04   | 0.07  |
| 0.50 | 5.78    | 14.60    | 30.95    | 73.68    |      |      |       |        |       |

Table S174: Critical values for detector  $\hat{H}_{mov}^{m,0.1}$  with windows size  $n = 0.1$ , and FM-OLS and D-OLS estimation in a model with intercept. The number of integrated regressors is 1 and the highest power of  $x_{kt}$  is 2.

| m    | 90 %     | 95 %     | 97,5 %    | 99 %      | m    | 90 %  | 95 %  | 97,5 % | 99 %   |
|------|----------|----------|-----------|-----------|------|-------|-------|--------|--------|
| 0.10 | 19736.76 | 56721.39 | 144617.52 | 391813.88 | 0.51 | 15.85 | 45.19 | 105.86 | 282.50 |
| 0.11 | 14134.10 | 40315.49 | 101781.71 | 290448.22 | 0.52 | 13.87 | 39.20 | 94.16  | 250.75 |
| 0.12 | 10447.40 | 30514.19 | 73510.46  | 208401.07 | 0.53 | 12.07 | 34.44 | 80.47  | 218.43 |
| 0.13 | 7856.11  | 22742.98 | 56690.32  | 151227.95 | 0.54 | 10.73 | 30.03 | 71.62  | 192.08 |
| 0.14 | 5990.63  | 17609.28 | 42091.50  | 112761.51 | 0.55 | 9.54  | 26.34 | 62.28  | 167.18 |
| 0.15 | 4648.74  | 13500.71 | 32901.51  | 84905.37  | 0.56 | 8.37  | 23.13 | 54.88  | 147.09 |
| 0.16 | 3677.75  | 10575.86 | 25529.63  | 69288.84  | 0.57 | 7.32  | 20.34 | 48.30  | 131.56 |
| 0.17 | 2917.02  | 8337.64  | 20366.81  | 54304.03  | 0.58 | 6.47  | 17.93 | 42.29  | 115.76 |
| 0.18 | 2359.15  | 6728.43  | 16200.31  | 44434.52  | 0.59 | 5.70  | 15.92 | 37.01  | 98.35  |
| 0.19 | 1924.35  | 5443.10  | 12899.63  | 36108.94  | 0.60 | 5.03  | 14.05 | 32.15  | 87.39  |
| 0.20 | 1544.29  | 4451.31  | 10884.95  | 30130.37  | 0.61 | 4.48  | 12.45 | 28.27  | 75.38  |
| 0.21 | 1280.77  | 3693.43  | 9066.88   | 25097.16  | 0.62 | 3.95  | 10.92 | 24.67  | 66.24  |
| 0.22 | 1062.55  | 3038.24  | 7295.38   | 20684.28  | 0.63 | 3.49  | 9.58  | 21.56  | 57.55  |
| 0.23 | 900.11   | 2550.52  | 6113.95   | 17452.85  | 0.64 | 3.07  | 8.32  | 18.79  | 49.93  |
| 0.24 | 749.06   | 2130.40  | 5136.49   | 14192.57  | 0.65 | 2.68  | 7.24  | 16.39  | 42.60  |
| 0.25 | 628.88   | 1787.27  | 4340.92   | 12019.23  | 0.66 | 2.33  | 6.31  | 14.12  | 36.30  |
| 0.26 | 531.72   | 1531.17  | 3742.48   | 10325.74  | 0.67 | 2.04  | 5.49  | 12.14  | 31.20  |
| 0.27 | 449.88   | 1276.25  | 3126.25   | 8707.53   | 0.68 | 1.80  | 4.69  | 10.58  | 26.44  |
| 0.28 | 379.13   | 1083.95  | 2635.89   | 7192.99   | 0.69 | 1.57  | 4.04  | 9.07   | 22.23  |
| 0.29 | 324.47   | 920.64   | 2241.22   | 5963.91   | 0.70 | 1.36  | 3.48  | 7.72   | 18.78  |
| 0.30 | 277.55   | 803.48   | 1940.36   | 5066.41   | 0.71 | 1.18  | 3.00  | 6.58   | 15.90  |
| 0.31 | 238.11   | 688.11   | 1663.00   | 4462.81   | 0.72 | 1.03  | 2.58  | 5.59   | 13.54  |
| 0.32 | 206.63   | 592.57   | 1412.01   | 3834.87   | 0.73 | 0.90  | 2.22  | 4.72   | 11.40  |
| 0.33 | 178.95   | 521.05   | 1239.40   | 3329.45   | 0.74 | 0.79  | 1.90  | 4.06   | 9.52   |
| 0.34 | 154.93   | 450.34   | 1072.04   | 2906.07   | 0.75 | 0.68  | 1.63  | 3.46   | 8.02   |
| 0.35 | 133.62   | 388.49   | 943.37    | 2529.14   | 0.76 | 0.59  | 1.39  | 2.94   | 6.92   |
| 0.36 | 116.17   | 335.43   | 810.27    | 2198.22   | 0.77 | 0.51  | 1.19  | 2.48   | 5.79   |
| 0.37 | 100.63   | 286.57   | 706.21    | 1860.75   | 0.78 | 0.44  | 1.01  | 2.10   | 4.95   |
| 0.38 | 85.72    | 250.12   | 622.89    | 1629.29   | 0.79 | 0.38  | 0.86  | 1.78   | 4.13   |
| 0.39 | 74.19    | 216.53   | 535.13    | 1428.10   | 0.80 | 0.32  | 0.73  | 1.47   | 3.30   |
| 0.40 | 64.79    | 186.69   | 461.20    | 1211.25   | 0.81 | 0.28  | 0.62  | 1.23   | 2.67   |
| 0.41 | 57.46    | 163.98   | 406.94    | 1078.59   | 0.82 | 0.24  | 0.52  | 1.01   | 2.23   |
| 0.42 | 50.43    | 144.45   | 352.30    | 915.78    | 0.83 | 0.21  | 0.43  | 0.83   | 1.81   |
| 0.43 | 44.37    | 125.31   | 310.86    | 816.60    | 0.84 | 0.18  | 0.36  | 0.69   | 1.49   |
| 0.44 | 39.41    | 111.30   | 271.00    | 717.36    | 0.85 | 0.15  | 0.29  | 0.55   | 1.19   |
| 0.45 | 34.54    | 97.65    | 237.43    | 619.56    | 0.86 | 0.13  | 0.24  | 0.45   | 0.94   |
| 0.46 | 30.35    | 85.95    | 205.65    | 539.82    | 0.87 | 0.11  | 0.20  | 0.36   | 0.75   |
| 0.47 | 26.64    | 75.81    | 177.43    | 482.75    | 0.88 | 0.09  | 0.16  | 0.29   | 0.58   |
| 0.48 | 23.56    | 66.32    | 156.50    | 420.17    | 0.89 | 0.08  | 0.13  | 0.23   | 0.44   |
| 0.49 | 20.59    | 58.67    | 137.37    | 365.26    | 0.90 | 0.06  | 0.11  | 0.18   | 0.35   |
| 0.50 | 18.09    | 51.59    | 119.59    | 322.61    |      |       |       |        |        |

Table S175: Critical values for detector  $\hat{H}_{mov}^{m,0.1}$  with windows size  $n = 0.1$ , and IM-OLS estimation in a model with intercept. The number of integrated regressors is 1 and the highest power of  $x_{kt}$  is 2.



| m    | 90 %    | 95 %     | 97,5 %   | 99 %      | m    | 90 % | 95 %  | 97,5 % | 99 %  |
|------|---------|----------|----------|-----------|------|------|-------|--------|-------|
| 0.10 | 9293.56 | 24129.01 | 55266.24 | 131986.14 | 0.51 | 7.27 | 18.22 | 37.95  | 89.12 |
| 0.11 | 6606.00 | 17532.47 | 39512.29 | 95419.64  | 0.52 | 6.31 | 15.85 | 33.48  | 76.54 |
| 0.12 | 4907.07 | 12985.68 | 29196.81 | 71507.24  | 0.53 | 5.57 | 13.80 | 28.87  | 66.34 |
| 0.13 | 3638.16 | 9601.50  | 21775.88 | 53037.03  | 0.54 | 4.93 | 12.10 | 25.46  | 57.91 |
| 0.14 | 2800.33 | 7372.58  | 16259.67 | 40504.22  | 0.55 | 4.32 | 10.64 | 22.48  | 49.81 |
| 0.15 | 2162.17 | 5737.47  | 12878.73 | 31076.55  | 0.56 | 3.84 | 9.40  | 19.25  | 43.41 |
| 0.16 | 1709.87 | 4479.20  | 10009.61 | 24391.63  | 0.57 | 3.35 | 8.32  | 17.09  | 38.52 |
| 0.17 | 1355.81 | 3522.12  | 7797.08  | 18590.23  | 0.58 | 2.94 | 7.18  | 14.97  | 33.73 |
| 0.18 | 1102.72 | 2904.18  | 6309.19  | 14884.03  | 0.59 | 2.58 | 6.33  | 12.85  | 29.90 |
| 0.19 | 884.52  | 2354.60  | 5098.85  | 12184.16  | 0.60 | 2.29 | 5.48  | 11.32  | 25.63 |
| 0.20 | 711.70  | 1905.35  | 4184.43  | 9892.75   | 0.61 | 2.02 | 4.76  | 9.67   | 22.23 |
| 0.21 | 578.37  | 1536.03  | 3430.26  | 8256.53   | 0.62 | 1.76 | 4.08  | 8.33   | 19.20 |
| 0.22 | 484.76  | 1270.67  | 2852.01  | 6836.23   | 0.63 | 1.54 | 3.54  | 7.42   | 16.56 |
| 0.23 | 401.83  | 1062.13  | 2401.37  | 5691.01   | 0.64 | 1.33 | 3.07  | 6.27   | 13.80 |
| 0.24 | 340.53  | 902.02   | 1986.47  | 4772.49   | 0.65 | 1.17 | 2.67  | 5.48   | 11.87 |
| 0.25 | 283.45  | 756.66   | 1693.88  | 4071.78   | 0.66 | 1.02 | 2.30  | 4.62   | 9.97  |
| 0.26 | 240.51  | 623.92   | 1408.95  | 3485.14   | 0.67 | 0.88 | 1.97  | 3.92   | 8.23  |
| 0.27 | 206.42  | 528.95   | 1170.95  | 2906.14   | 0.68 | 0.78 | 1.71  | 3.34   | 6.96  |
| 0.28 | 175.89  | 455.08   | 994.76   | 2439.47   | 0.69 | 0.67 | 1.46  | 2.86   | 5.95  |
| 0.29 | 150.17  | 386.58   | 850.71   | 2011.68   | 0.70 | 0.58 | 1.28  | 2.45   | 4.91  |
| 0.30 | 128.36  | 334.57   | 725.32   | 1741.33   | 0.71 | 0.51 | 1.08  | 2.06   | 4.23  |
| 0.31 | 109.74  | 284.73   | 630.25   | 1500.49   | 0.72 | 0.45 | 0.93  | 1.74   | 3.59  |
| 0.32 | 94.04   | 242.83   | 538.47   | 1292.64   | 0.73 | 0.39 | 0.79  | 1.50   | 3.04  |
| 0.33 | 81.14   | 210.44   | 462.47   | 1099.98   | 0.74 | 0.34 | 0.68  | 1.28   | 2.56  |
| 0.34 | 70.18   | 180.47   | 405.52   | 964.99    | 0.75 | 0.29 | 0.57  | 1.08   | 2.12  |
| 0.35 | 60.47   | 154.25   | 341.44   | 815.95    | 0.76 | 0.25 | 0.49  | 0.90   | 1.80  |
| 0.36 | 52.63   | 134.12   | 295.08   | 693.11    | 0.77 | 0.22 | 0.41  | 0.76   | 1.52  |
| 0.37 | 45.25   | 118.20   | 252.46   | 616.40    | 0.78 | 0.19 | 0.35  | 0.62   | 1.24  |
| 0.38 | 39.42   | 104.01   | 221.98   | 530.96    | 0.79 | 0.16 | 0.29  | 0.51   | 0.98  |
| 0.39 | 34.65   | 89.92    | 194.22   | 466.11    | 0.80 | 0.14 | 0.25  | 0.42   | 0.80  |
| 0.40 | 30.02   | 78.79    | 166.98   | 401.41    | 0.81 | 0.13 | 0.20  | 0.35   | 0.65  |
| 0.41 | 26.40   | 68.21    | 147.45   | 344.28    | 0.82 | 0.11 | 0.17  | 0.29   | 0.52  |
| 0.42 | 23.31   | 60.18    | 129.16   | 304.25    | 0.83 | 0.10 | 0.15  | 0.23   | 0.41  |
| 0.43 | 20.44   | 52.15    | 112.35   | 260.50    | 0.84 | 0.08 | 0.13  | 0.19   | 0.33  |
| 0.44 | 17.75   | 45.18    | 99.07    | 230.72    | 0.85 | 0.07 | 0.11  | 0.15   | 0.26  |
| 0.45 | 15.80   | 39.53    | 86.39    | 203.65    | 0.86 | 0.07 | 0.09  | 0.13   | 0.20  |
| 0.46 | 13.70   | 34.87    | 77.12    | 175.58    | 0.87 | 0.06 | 0.08  | 0.11   | 0.17  |
| 0.47 | 12.12   | 30.68    | 66.43    | 154.42    | 0.88 | 0.05 | 0.07  | 0.10   | 0.14  |
| 0.48 | 10.69   | 26.88    | 57.24    | 132.39    | 0.89 | 0.05 | 0.07  | 0.09   | 0.12  |
| 0.49 | 9.43    | 23.82    | 50.98    | 117.61    | 0.90 | 0.04 | 0.06  | 0.08   | 0.11  |
| 0.50 | 8.26    | 20.68    | 43.61    | 101.88    |      |      |       |        |       |

Table S176: Critical values for detector  $\hat{H}_{mov}^{m,0.2}$  with windows size  $n = 0.2$ , and FM-OLS and D-OLS estimation in a model with intercept. The number of integrated regressors is 1 and the highest power of  $x_{kt}$  is 2.

| m    | 90 %     | 95 %     | 97,5 %    | 99 %      | m    | 90 %  | 95 %  | 97,5 % | 99 %   |
|------|----------|----------|-----------|-----------|------|-------|-------|--------|--------|
| 0.10 | 30323.78 | 87187.00 | 225910.18 | 612118.69 | 0.51 | 22.44 | 63.26 | 149.98 | 389.36 |
| 0.11 | 21642.50 | 62568.96 | 159270.55 | 451073.61 | 0.52 | 19.63 | 55.01 | 132.20 | 347.42 |
| 0.12 | 15917.90 | 47020.20 | 114479.65 | 330424.87 | 0.53 | 17.06 | 47.96 | 113.47 | 301.49 |
| 0.13 | 12068.84 | 34970.25 | 87968.54  | 235866.43 | 0.54 | 15.04 | 41.67 | 99.75  | 264.70 |
| 0.14 | 9164.77  | 27217.13 | 65450.79  | 176978.80 | 0.55 | 13.24 | 36.43 | 85.88  | 230.00 |
| 0.15 | 7122.28  | 20814.31 | 51019.47  | 132620.15 | 0.56 | 11.60 | 31.68 | 75.40  | 202.58 |
| 0.16 | 5603.55  | 16187.77 | 39875.42  | 108302.27 | 0.57 | 10.19 | 27.66 | 65.63  | 176.06 |
| 0.17 | 4447.77  | 12846.20 | 31412.98  | 85575.11  | 0.58 | 8.90  | 24.48 | 56.98  | 153.15 |
| 0.18 | 3583.23  | 10399.96 | 25156.67  | 69556.86  | 0.59 | 7.84  | 21.56 | 49.66  | 133.49 |
| 0.19 | 2923.31  | 8315.98  | 19860.39  | 56140.24  | 0.60 | 6.89  | 18.88 | 42.96  | 116.69 |
| 0.20 | 2361.76  | 6804.84  | 16790.90  | 47113.56  | 0.61 | 6.06  | 16.67 | 37.55  | 100.70 |
| 0.21 | 1944.12  | 5686.08  | 13852.96  | 38777.91  | 0.62 | 5.32  | 14.43 | 32.72  | 86.58  |
| 0.22 | 1617.62  | 4646.43  | 11199.80  | 32002.49  | 0.63 | 4.70  | 12.59 | 28.31  | 74.94  |
| 0.23 | 1370.07  | 3905.07  | 9495.28   | 26445.55  | 0.64 | 4.09  | 10.89 | 24.46  | 64.33  |
| 0.24 | 1140.78  | 3246.90  | 7884.85   | 21609.22  | 0.65 | 3.54  | 9.42  | 21.27  | 54.16  |
| 0.25 | 949.00   | 2714.41  | 6661.56   | 18371.66  | 0.66 | 3.07  | 8.18  | 18.21  | 46.19  |
| 0.26 | 802.83   | 2329.99  | 5688.23   | 15990.67  | 0.67 | 2.65  | 7.06  | 15.44  | 39.71  |
| 0.27 | 681.79   | 1930.13  | 4759.00   | 13399.77  | 0.68 | 2.33  | 6.00  | 13.18  | 33.23  |
| 0.28 | 569.03   | 1632.88  | 4055.81   | 11098.46  | 0.69 | 2.02  | 5.13  | 11.31  | 27.05  |
| 0.29 | 489.59   | 1390.91  | 3420.07   | 9121.35   | 0.70 | 1.75  | 4.40  | 9.55   | 23.00  |
| 0.30 | 414.89   | 1202.15  | 2935.26   | 7700.78   | 0.71 | 1.50  | 3.75  | 8.04   | 19.42  |
| 0.31 | 358.87   | 1029.74  | 2496.82   | 6766.88   | 0.72 | 1.31  | 3.20  | 6.79   | 16.08  |
| 0.32 | 311.31   | 894.91   | 2128.67   | 5839.13   | 0.73 | 1.13  | 2.73  | 5.69   | 13.57  |
| 0.33 | 267.07   | 778.51   | 1850.94   | 5042.48   | 0.74 | 0.97  | 2.31  | 4.89   | 11.20  |
| 0.34 | 230.95   | 676.18   | 1606.28   | 4314.74   | 0.75 | 0.84  | 1.96  | 4.06   | 9.33   |
| 0.35 | 199.05   | 579.64   | 1392.95   | 3707.28   | 0.76 | 0.72  | 1.66  | 3.45   | 7.94   |
| 0.36 | 172.42   | 499.53   | 1202.51   | 3255.42   | 0.77 | 0.61  | 1.40  | 2.86   | 6.63   |
| 0.37 | 148.25   | 427.42   | 1051.90   | 2754.02   | 0.78 | 0.53  | 1.18  | 2.39   | 5.55   |
| 0.38 | 126.41   | 372.22   | 913.22    | 2442.92   | 0.79 | 0.45  | 0.99  | 2.02   | 4.53   |
| 0.39 | 109.37   | 316.07   | 779.72    | 2111.81   | 0.80 | 0.38  | 0.84  | 1.65   | 3.64   |
| 0.40 | 94.88    | 274.44   | 672.39    | 1808.07   | 0.81 | 0.33  | 0.70  | 1.36   | 2.92   |
| 0.41 | 83.57    | 239.89   | 591.31    | 1579.84   | 0.82 | 0.28  | 0.58  | 1.11   | 2.40   |
| 0.42 | 73.54    | 210.91   | 513.60    | 1335.43   | 0.83 | 0.24  | 0.47  | 0.89   | 1.93   |
| 0.43 | 64.79    | 183.28   | 448.39    | 1183.55   | 0.84 | 0.20  | 0.39  | 0.74   | 1.57   |
| 0.44 | 57.13    | 161.29   | 395.31    | 1037.05   | 0.85 | 0.17  | 0.32  | 0.59   | 1.24   |
| 0.45 | 49.66    | 140.61   | 340.84    | 888.88    | 0.86 | 0.14  | 0.26  | 0.47   | 0.97   |
| 0.46 | 43.83    | 123.33   | 295.77    | 769.32    | 0.87 | 0.12  | 0.21  | 0.37   | 0.77   |
| 0.47 | 38.30    | 108.69   | 255.79    | 689.14    | 0.88 | 0.10  | 0.17  | 0.30   | 0.60   |
| 0.48 | 33.48    | 94.53    | 223.59    | 600.86    | 0.89 | 0.08  | 0.14  | 0.24   | 0.45   |
| 0.49 | 29.24    | 83.04    | 195.45    | 515.57    | 0.90 | 0.07  | 0.11  | 0.19   | 0.35   |
| 0.50 | 25.59    | 73.03    | 170.22    | 447.93    |      |       |       |        |        |

Table S177: Critical values for detector  $\hat{H}_{mov}^{m,0.2}$  with windows size  $n = 0.2$ , and IM-OLS estimation in a model with intercept. The number of integrated regressors is 1 and the highest power of  $x_{kt}$  is 2.

| m    | 90 %     | 95 %     | 97,5 %   | 99 %      | m    | 90 % | 95 %  | 97,5 % | 99 %  |
|------|----------|----------|----------|-----------|------|------|-------|--------|-------|
| 0.10 | 10975.27 | 28529.19 | 66063.12 | 155556.51 | 0.51 | 8.04 | 19.98 | 41.33  | 96.25 |
| 0.11 | 7793.60  | 20744.45 | 47096.45 | 113332.81 | 0.52 | 6.97 | 17.42 | 36.06  | 82.42 |
| 0.12 | 5782.18  | 15404.00 | 34740.23 | 85520.21  | 0.53 | 6.12 | 15.03 | 30.98  | 71.67 |
| 0.13 | 4296.65  | 11349.83 | 25768.14 | 63490.10  | 0.54 | 5.40 | 13.10 | 27.39  | 62.06 |
| 0.14 | 3295.77  | 8658.91  | 19198.42 | 48578.15  | 0.55 | 4.73 | 11.52 | 24.11  | 53.45 |
| 0.15 | 2538.49  | 6764.09  | 15298.80 | 36694.81  | 0.56 | 4.18 | 10.08 | 20.66  | 46.71 |
| 0.16 | 2010.57  | 5264.70  | 11876.80 | 28791.64  | 0.57 | 3.65 | 8.92  | 18.20  | 40.82 |
| 0.17 | 1589.63  | 4199.42  | 9167.11  | 22031.52  | 0.58 | 3.18 | 7.67  | 15.88  | 35.77 |
| 0.18 | 1292.48  | 3402.77  | 7451.43  | 17537.26  | 0.59 | 2.78 | 6.76  | 13.57  | 31.41 |
| 0.19 | 1031.56  | 2763.96  | 6033.11  | 14343.86  | 0.60 | 2.46 | 5.83  | 11.97  | 26.88 |
| 0.20 | 833.86   | 2225.70  | 4935.12  | 11741.79  | 0.61 | 2.17 | 5.02  | 10.21  | 23.08 |
| 0.21 | 676.72   | 1804.53  | 4015.87  | 9794.69   | 0.62 | 1.88 | 4.32  | 8.71   | 19.92 |
| 0.22 | 567.80   | 1480.96  | 3347.60  | 8040.93   | 0.63 | 1.63 | 3.72  | 7.71   | 17.08 |
| 0.23 | 468.74   | 1243.86  | 2786.05  | 6654.37   | 0.64 | 1.41 | 3.22  | 6.50   | 14.17 |
| 0.24 | 395.65   | 1049.64  | 2326.12  | 5615.56   | 0.65 | 1.24 | 2.78  | 5.65   | 12.24 |
| 0.25 | 329.53   | 885.58   | 1963.24  | 4731.57   | 0.66 | 1.07 | 2.38  | 4.76   | 10.22 |
| 0.26 | 280.60   | 727.09   | 1637.32  | 4024.50   | 0.67 | 0.92 | 2.04  | 4.02   | 8.40  |
| 0.27 | 240.56   | 612.55   | 1357.49  | 3364.84   | 0.68 | 0.81 | 1.76  | 3.42   | 7.08  |
| 0.28 | 205.02   | 523.32   | 1159.72  | 2817.19   | 0.69 | 0.70 | 1.50  | 2.91   | 6.02  |
| 0.29 | 173.67   | 447.06   | 982.40   | 2349.93   | 0.70 | 0.61 | 1.31  | 2.48   | 4.97  |
| 0.30 | 148.49   | 384.72   | 842.16   | 2022.64   | 0.71 | 0.53 | 1.10  | 2.08   | 4.27  |
| 0.31 | 126.56   | 330.71   | 728.19   | 1729.71   | 0.72 | 0.47 | 0.94  | 1.76   | 3.61  |
| 0.32 | 107.87   | 279.88   | 615.26   | 1493.21   | 0.73 | 0.41 | 0.80  | 1.52   | 3.05  |
| 0.33 | 93.15    | 242.60   | 525.20   | 1261.51   | 0.74 | 0.36 | 0.69  | 1.29   | 2.57  |
| 0.34 | 80.33    | 206.48   | 462.54   | 1111.38   | 0.75 | 0.32 | 0.58  | 1.09   | 2.12  |
| 0.35 | 69.01    | 176.83   | 390.93   | 935.24    | 0.76 | 0.28 | 0.50  | 0.90   | 1.81  |
| 0.36 | 60.28    | 152.88   | 336.12   | 786.56    | 0.77 | 0.25 | 0.42  | 0.76   | 1.52  |
| 0.37 | 51.78    | 134.86   | 289.82   | 700.22    | 0.78 | 0.22 | 0.37  | 0.63   | 1.24  |
| 0.38 | 45.01    | 117.94   | 250.29   | 604.01    | 0.79 | 0.20 | 0.32  | 0.52   | 0.98  |
| 0.39 | 39.56    | 101.40   | 217.52   | 519.71    | 0.80 | 0.18 | 0.28  | 0.43   | 0.80  |
| 0.40 | 34.14    | 88.81    | 189.73   | 448.55    | 0.81 | 0.16 | 0.24  | 0.37   | 0.65  |
| 0.41 | 29.93    | 76.98    | 164.17   | 386.74    | 0.82 | 0.15 | 0.22  | 0.32   | 0.53  |
| 0.42 | 26.31    | 67.86    | 145.62   | 337.02    | 0.83 | 0.13 | 0.19  | 0.27   | 0.43  |
| 0.43 | 22.97    | 58.67    | 126.11   | 289.04    | 0.84 | 0.12 | 0.17  | 0.24   | 0.36  |
| 0.44 | 20.00    | 50.71    | 110.18   | 256.63    | 0.85 | 0.11 | 0.15  | 0.21   | 0.31  |
| 0.45 | 17.73    | 44.09    | 95.37    | 223.53    | 0.86 | 0.10 | 0.14  | 0.19   | 0.27  |
| 0.46 | 15.39    | 38.83    | 85.37    | 193.30    | 0.87 | 0.09 | 0.13  | 0.17   | 0.24  |
| 0.47 | 13.52    | 34.12    | 73.33    | 168.41    | 0.88 | 0.09 | 0.12  | 0.16   | 0.22  |
| 0.48 | 11.89    | 29.65    | 63.37    | 144.99    | 0.89 | 0.08 | 0.11  | 0.15   | 0.20  |
| 0.49 | 10.49    | 26.16    | 55.77    | 128.17    | 0.90 | 0.08 | 0.11  | 0.14   | 0.19  |
| 0.50 | 9.11     | 22.60    | 47.94    | 111.10    |      |      |       |        |       |

Table S178: Critical values for detector  $\hat{H}_{mov}^{m,0.3}$  with windows size  $n = 0.3$ , and FM-OLS and D-OLS estimation in a model with intercept. The number of integrated regressors is 1 and the highest power of  $x_{kt}$  is 2.

| m    | 90 %     | 95 %      | 97,5 %    | 99 %      | m    | 90 %  | 95 %  | 97,5 % | 99 %   |
|------|----------|-----------|-----------|-----------|------|-------|-------|--------|--------|
| 0.10 | 35616.12 | 103227.95 | 267552.08 | 729335.07 | 0.51 | 24.84 | 69.28 | 163.98 | 419.72 |
| 0.11 | 25335.50 | 73826.91  | 188286.79 | 537746.31 | 0.52 | 21.68 | 60.13 | 143.39 | 376.09 |
| 0.12 | 18643.48 | 55882.11  | 135248.18 | 394996.05 | 0.53 | 18.83 | 52.51 | 123.65 | 324.59 |
| 0.13 | 14153.30 | 41436.72  | 103942.52 | 278411.92 | 0.54 | 16.47 | 45.17 | 108.68 | 284.62 |
| 0.14 | 10717.50 | 31948.22  | 77158.31  | 209969.85 | 0.55 | 14.50 | 39.36 | 92.52  | 246.87 |
| 0.15 | 8387.55  | 24513.96  | 60197.29  | 157875.88 | 0.56 | 12.62 | 34.16 | 80.44  | 212.74 |
| 0.16 | 6575.87  | 19110.62  | 47168.11  | 127363.74 | 0.57 | 11.07 | 29.62 | 70.29  | 187.99 |
| 0.17 | 5219.33  | 15089.80  | 37093.83  | 101403.78 | 0.58 | 9.61  | 26.24 | 60.89  | 162.81 |
| 0.18 | 4191.01  | 12245.46  | 29554.65  | 82109.21  | 0.59 | 8.47  | 22.95 | 52.59  | 140.85 |
| 0.19 | 3398.17  | 9845.97   | 23261.10  | 65929.38  | 0.60 | 7.41  | 20.10 | 45.63  | 122.23 |
| 0.20 | 2756.43  | 7955.32   | 19703.22  | 55220.41  | 0.61 | 6.45  | 17.59 | 39.66  | 104.24 |
| 0.21 | 2260.69  | 6646.11   | 16253.01  | 45441.10  | 0.62 | 5.67  | 15.28 | 34.32  | 90.82  |
| 0.22 | 1883.84  | 5434.84   | 13203.35  | 37496.44  | 0.63 | 4.98  | 13.19 | 29.57  | 78.12  |
| 0.23 | 1595.12  | 4573.01   | 11098.54  | 30763.65  | 0.64 | 4.32  | 11.43 | 25.40  | 66.43  |
| 0.24 | 1332.68  | 3788.53   | 9151.17   | 25150.42  | 0.65 | 3.74  | 9.85  | 22.05  | 56.26  |
| 0.25 | 1099.74  | 3161.13   | 7748.34   | 21574.26  | 0.66 | 3.22  | 8.50  | 18.75  | 47.65  |
| 0.26 | 933.63   | 2719.80   | 6640.24   | 18574.87  | 0.67 | 2.77  | 7.34  | 15.89  | 40.85  |
| 0.27 | 786.92   | 2241.00   | 5510.72   | 15479.23  | 0.68 | 2.43  | 6.18  | 13.50  | 33.98  |
| 0.28 | 659.29   | 1884.56   | 4710.20   | 12920.87  | 0.69 | 2.10  | 5.26  | 11.57  | 27.56  |
| 0.29 | 565.94   | 1618.49   | 3956.10   | 10682.04  | 0.70 | 1.81  | 4.50  | 9.75   | 23.31  |
| 0.30 | 477.13   | 1387.58   | 3406.93   | 8934.91   | 0.71 | 1.55  | 3.83  | 8.18   | 19.65  |
| 0.31 | 413.02   | 1189.77   | 2871.45   | 7758.51   | 0.72 | 1.35  | 3.27  | 6.89   | 16.25  |
| 0.32 | 356.82   | 1030.72   | 2458.65   | 6630.17   | 0.73 | 1.16  | 2.77  | 5.75   | 13.65  |
| 0.33 | 306.03   | 892.83    | 2107.44   | 5771.14   | 0.74 | 0.99  | 2.34  | 4.92   | 11.25  |
| 0.34 | 264.57   | 778.28    | 1843.92   | 4951.97   | 0.75 | 0.85  | 1.98  | 4.09   | 9.39   |
| 0.35 | 227.46   | 659.99    | 1583.27   | 4187.99   | 0.76 | 0.73  | 1.67  | 3.46   | 7.98   |
| 0.36 | 196.67   | 566.69    | 1372.82   | 3634.96   | 0.77 | 0.62  | 1.41  | 2.88   | 6.64   |
| 0.37 | 168.72   | 484.92    | 1198.61   | 3127.24   | 0.78 | 0.54  | 1.19  | 2.40   | 5.56   |
| 0.38 | 144.31   | 423.18    | 1027.90   | 2790.27   | 0.79 | 0.45  | 1.00  | 2.03   | 4.54   |
| 0.39 | 124.60   | 361.55    | 880.60    | 2373.95   | 0.80 | 0.39  | 0.84  | 1.66   | 3.65   |
| 0.40 | 107.59   | 309.13    | 756.13    | 2047.31   | 0.81 | 0.33  | 0.70  | 1.36   | 2.92   |
| 0.41 | 94.26    | 269.19    | 661.05    | 1760.91   | 0.82 | 0.28  | 0.58  | 1.11   | 2.41   |
| 0.42 | 82.80    | 237.04    | 576.69    | 1494.57   | 0.83 | 0.24  | 0.48  | 0.90   | 1.93   |
| 0.43 | 73.26    | 206.47    | 500.62    | 1315.56   | 0.84 | 0.20  | 0.40  | 0.74   | 1.57   |
| 0.44 | 64.35    | 180.06    | 439.78    | 1156.90   | 0.85 | 0.17  | 0.32  | 0.59   | 1.24   |
| 0.45 | 55.66    | 156.93    | 375.50    | 986.08    | 0.86 | 0.14  | 0.27  | 0.47   | 0.98   |
| 0.46 | 49.06    | 137.05    | 328.96    | 851.03    | 0.87 | 0.12  | 0.22  | 0.38   | 0.77   |
| 0.47 | 42.58    | 120.36    | 283.62    | 747.68    | 0.88 | 0.10  | 0.18  | 0.30   | 0.60   |
| 0.48 | 37.16    | 104.52    | 244.54    | 652.62    | 0.89 | 0.09  | 0.15  | 0.24   | 0.46   |
| 0.49 | 32.49    | 91.49     | 213.70    | 566.74    | 0.90 | 0.07  | 0.12  | 0.19   | 0.36   |
| 0.50 | 28.27    | 79.63     | 185.66    | 491.05    |      |       |       |        |        |

Table S179: Critical values for detector  $\hat{H}_{mov}^{m,0.3}$  with windows size  $n = 0.3$ , and IM-OLS estimation in a model with intercept. The number of integrated regressors is 1 and the highest power of  $x_{kt}$  is 2.

| m    | 90 %     | 95 %     | 97,5 %   | 99 %      | m    | 90 % | 95 %  | 97,5 % | 99 %  |
|------|----------|----------|----------|-----------|------|------|-------|--------|-------|
| 0.10 | 14637.47 | 33287.67 | 67195.19 | 148630.06 | 0.51 | 7.93 | 16.36 | 32.50  | 71.47 |
| 0.11 | 10085.23 | 23123.34 | 47403.61 | 104912.84 | 0.52 | 6.99 | 14.45 | 27.89  | 62.86 |
| 0.12 | 7207.89  | 16611.36 | 33500.40 | 76893.84  | 0.53 | 6.13 | 12.60 | 24.21  | 54.95 |
| 0.13 | 5187.79  | 11632.85 | 24157.25 | 56354.49  | 0.54 | 5.43 | 11.09 | 21.52  | 47.65 |
| 0.14 | 3858.82  | 8656.85  | 18063.18 | 41471.97  | 0.55 | 4.79 | 9.69  | 18.95  | 42.09 |
| 0.15 | 2929.74  | 6612.19  | 13562.35 | 30477.16  | 0.56 | 4.28 | 8.67  | 16.52  | 37.14 |
| 0.16 | 2253.18  | 5099.29  | 10262.68 | 23315.53  | 0.57 | 3.80 | 7.53  | 14.74  | 32.22 |
| 0.17 | 1723.45  | 3928.86  | 7964.05  | 17590.53  | 0.58 | 3.34 | 6.67  | 12.78  | 27.94 |
| 0.18 | 1373.57  | 3061.27  | 6215.86  | 13642.88  | 0.59 | 2.96 | 5.80  | 11.24  | 24.50 |
| 0.19 | 1093.09  | 2417.82  | 5017.20  | 10932.44  | 0.60 | 2.60 | 5.11  | 9.96   | 21.43 |
| 0.20 | 874.05   | 1939.19  | 4034.15  | 9003.78   | 0.61 | 2.29 | 4.50  | 8.52   | 18.36 |
| 0.21 | 702.15   | 1562.80  | 3248.87  | 7404.92   | 0.62 | 2.00 | 3.90  | 7.35   | 16.00 |
| 0.22 | 570.03   | 1268.75  | 2609.92  | 5964.99   | 0.63 | 1.77 | 3.40  | 6.45   | 14.13 |
| 0.23 | 473.99   | 1048.60  | 2184.93  | 4793.99   | 0.64 | 1.54 | 2.97  | 5.57   | 11.73 |
| 0.24 | 396.95   | 873.69   | 1785.19  | 4153.82   | 0.65 | 1.36 | 2.61  | 4.90   | 10.20 |
| 0.25 | 325.58   | 732.08   | 1503.23  | 3392.55   | 0.66 | 1.19 | 2.27  | 4.22   | 8.84  |
| 0.26 | 274.37   | 606.07   | 1231.47  | 2881.82   | 0.67 | 1.05 | 1.97  | 3.57   | 7.57  |
| 0.27 | 232.62   | 510.67   | 1032.09  | 2401.67   | 0.68 | 0.92 | 1.70  | 3.04   | 6.43  |
| 0.28 | 195.36   | 430.42   | 869.02   | 2009.50   | 0.69 | 0.81 | 1.48  | 2.66   | 5.49  |
| 0.29 | 164.51   | 370.17   | 739.53   | 1645.42   | 0.70 | 0.71 | 1.30  | 2.30   | 4.63  |
| 0.30 | 140.40   | 309.83   | 617.71   | 1456.26   | 0.71 | 0.62 | 1.13  | 1.96   | 3.98  |
| 0.31 | 119.97   | 263.22   | 544.38   | 1231.35   | 0.72 | 0.55 | 0.99  | 1.70   | 3.39  |
| 0.32 | 102.32   | 224.19   | 457.29   | 1049.40   | 0.73 | 0.48 | 0.85  | 1.47   | 2.92  |
| 0.33 | 88.71    | 193.38   | 391.86   | 918.24    | 0.74 | 0.42 | 0.74  | 1.27   | 2.43  |
| 0.34 | 75.85    | 163.80   | 342.86   | 759.62    | 0.75 | 0.36 | 0.63  | 1.07   | 2.05  |
| 0.35 | 65.66    | 140.55   | 290.79   | 666.63    | 0.76 | 0.32 | 0.54  | 0.91   | 1.79  |
| 0.36 | 57.16    | 123.39   | 244.49   | 566.45    | 0.77 | 0.27 | 0.46  | 0.78   | 1.51  |
| 0.37 | 49.27    | 106.21   | 210.53   | 491.85    | 0.78 | 0.23 | 0.40  | 0.66   | 1.23  |
| 0.38 | 42.50    | 92.68    | 182.48   | 425.71    | 0.79 | 0.20 | 0.34  | 0.54   | 0.99  |
| 0.39 | 37.12    | 79.46    | 158.12   | 365.82    | 0.80 | 0.17 | 0.29  | 0.45   | 0.83  |
| 0.40 | 32.21    | 69.65    | 138.28   | 313.62    | 0.81 | 0.15 | 0.24  | 0.38   | 0.67  |
| 0.41 | 28.58    | 60.79    | 118.89   | 271.83    | 0.82 | 0.13 | 0.20  | 0.31   | 0.54  |
| 0.42 | 25.03    | 53.30    | 106.75   | 236.09    | 0.83 | 0.11 | 0.17  | 0.25   | 0.44  |
| 0.43 | 21.96    | 46.98    | 90.73    | 202.45    | 0.84 | 0.09 | 0.14  | 0.21   | 0.35  |
| 0.44 | 19.38    | 40.86    | 79.36    | 180.54    | 0.85 | 0.07 | 0.11  | 0.17   | 0.28  |
| 0.45 | 16.94    | 35.93    | 71.05    | 155.29    | 0.86 | 0.06 | 0.09  | 0.13   | 0.22  |
| 0.46 | 14.83    | 31.24    | 62.75    | 136.15    | 0.87 | 0.05 | 0.07  | 0.11   | 0.17  |
| 0.47 | 13.15    | 27.49    | 54.42    | 120.10    | 0.88 | 0.04 | 0.06  | 0.08   | 0.13  |
| 0.48 | 11.49    | 24.28    | 48.17    | 105.01    | 0.89 | 0.03 | 0.05  | 0.06   | 0.10  |
| 0.49 | 10.19    | 21.24    | 42.30    | 91.67     | 0.90 | 0.03 | 0.04  | 0.05   | 0.07  |
| 0.50 | 8.93     | 18.66    | 36.72    | 81.02     |      |      |       |        |       |

Table S180: Critical values for detector  $\hat{H}_{mov}^{m,0.1}$  with windows size  $n = 0.1$ , and FM-OLS and D-OLS estimation in a model with intercept and linear trend. The number of integrated regressors is 1 and the highest power of  $x_{kt}$  is 2.

| m    | 90 %     | 95 %     | 97,5 %    | 99 %      | m    | 90 %  | 95 %  | 97,5 % | 99 %   |
|------|----------|----------|-----------|-----------|------|-------|-------|--------|--------|
| 0.10 | 37573.95 | 93561.33 | 206941.32 | 518694.33 | 0.51 | 18.81 | 43.37 | 92.69  | 233.51 |
| 0.11 | 26555.91 | 64664.08 | 144122.68 | 359153.48 | 0.52 | 16.57 | 38.23 | 82.46  | 206.58 |
| 0.12 | 18759.59 | 46350.25 | 104824.89 | 258426.66 | 0.53 | 14.44 | 33.60 | 71.21  | 181.61 |
| 0.13 | 13470.50 | 33464.69 | 74357.00  | 182572.83 | 0.54 | 12.70 | 29.39 | 61.54  | 158.34 |
| 0.14 | 9900.30  | 24907.96 | 55890.24  | 136667.26 | 0.55 | 11.20 | 25.78 | 54.68  | 135.12 |
| 0.15 | 7460.98  | 18508.23 | 41397.57  | 101688.21 | 0.56 | 9.86  | 22.64 | 47.46  | 117.46 |
| 0.16 | 5729.02  | 14428.99 | 31865.49  | 77615.13  | 0.57 | 8.67  | 19.80 | 41.79  | 105.36 |
| 0.17 | 4442.24  | 11062.74 | 23848.93  | 60580.31  | 0.58 | 7.69  | 17.22 | 36.90  | 93.51  |
| 0.18 | 3508.55  | 8662.55  | 19059.16  | 46697.11  | 0.59 | 6.76  | 15.11 | 32.65  | 81.85  |
| 0.19 | 2754.02  | 6743.90  | 14967.34  | 35798.41  | 0.60 | 5.99  | 13.30 | 28.50  | 71.25  |
| 0.20 | 2200.29  | 5379.44  | 12058.49  | 30104.83  | 0.61 | 5.24  | 11.73 | 24.74  | 60.35  |
| 0.21 | 1774.37  | 4383.26  | 9674.90   | 24145.48  | 0.62 | 4.59  | 10.27 | 21.30  | 51.67  |
| 0.22 | 1439.81  | 3466.06  | 7849.79   | 19659.25  | 0.63 | 4.08  | 8.93  | 18.83  | 45.78  |
| 0.23 | 1182.66  | 2917.15  | 6494.47   | 16241.84  | 0.64 | 3.59  | 7.78  | 16.42  | 39.62  |
| 0.24 | 984.25   | 2438.46  | 5470.81   | 13422.07  | 0.65 | 3.15  | 6.85  | 14.10  | 34.33  |
| 0.25 | 832.94   | 2035.27  | 4548.03   | 11384.31  | 0.66 | 2.76  | 5.95  | 12.26  | 29.51  |
| 0.26 | 693.07   | 1692.56  | 3746.50   | 9200.70   | 0.67 | 2.43  | 5.18  | 10.55  | 25.15  |
| 0.27 | 582.39   | 1423.76  | 3112.04   | 7690.05   | 0.68 | 2.10  | 4.53  | 9.22   | 20.85  |
| 0.28 | 491.67   | 1188.84  | 2606.13   | 6444.54   | 0.69 | 1.85  | 3.93  | 7.87   | 17.75  |
| 0.29 | 409.55   | 1006.35  | 2203.90   | 5362.37   | 0.70 | 1.63  | 3.35  | 6.76   | 15.25  |
| 0.30 | 350.17   | 835.80   | 1881.33   | 4542.14   | 0.71 | 1.43  | 2.92  | 5.73   | 12.95  |
| 0.31 | 297.45   | 724.34   | 1609.75   | 4009.89   | 0.72 | 1.25  | 2.52  | 4.94   | 11.11  |
| 0.32 | 256.70   | 626.47   | 1372.14   | 3344.85   | 0.73 | 1.09  | 2.16  | 4.19   | 9.38   |
| 0.33 | 219.42   | 535.80   | 1170.81   | 2851.59   | 0.74 | 0.95  | 1.86  | 3.58   | 7.72   |
| 0.34 | 187.13   | 455.60   | 1008.27   | 2439.95   | 0.75 | 0.82  | 1.60  | 3.01   | 6.68   |
| 0.35 | 159.87   | 385.40   | 855.03    | 2131.48   | 0.76 | 0.71  | 1.37  | 2.57   | 5.54   |
| 0.36 | 137.86   | 329.36   | 733.90    | 1834.02   | 0.77 | 0.61  | 1.18  | 2.18   | 4.67   |
| 0.37 | 118.81   | 289.06   | 648.19    | 1612.58   | 0.78 | 0.53  | 1.00  | 1.85   | 3.89   |
| 0.38 | 102.96   | 248.40   | 563.23    | 1428.50   | 0.79 | 0.46  | 0.85  | 1.56   | 3.23   |
| 0.39 | 89.95    | 213.78   | 482.00    | 1254.99   | 0.80 | 0.39  | 0.72  | 1.31   | 2.66   |
| 0.40 | 78.21    | 187.32   | 421.05    | 1077.17   | 0.81 | 0.33  | 0.60  | 1.08   | 2.20   |
| 0.41 | 68.00    | 164.80   | 360.85    | 922.41    | 0.82 | 0.29  | 0.51  | 0.90   | 1.82   |
| 0.42 | 59.73    | 142.98   | 314.71    | 796.76    | 0.83 | 0.24  | 0.43  | 0.74   | 1.49   |
| 0.43 | 52.40    | 124.96   | 273.90    | 688.31    | 0.84 | 0.20  | 0.35  | 0.60   | 1.20   |
| 0.44 | 45.93    | 110.55   | 243.73    | 606.04    | 0.85 | 0.17  | 0.29  | 0.49   | 0.95   |
| 0.45 | 40.33    | 96.83    | 210.65    | 535.27    | 0.86 | 0.14  | 0.24  | 0.40   | 0.75   |
| 0.46 | 35.64    | 84.67    | 181.18    | 464.19    | 0.87 | 0.12  | 0.20  | 0.32   | 0.58   |
| 0.47 | 31.25    | 74.11    | 157.94    | 394.79    | 0.88 | 0.10  | 0.16  | 0.25   | 0.45   |
| 0.48 | 27.48    | 65.01    | 138.05    | 339.98    | 0.89 | 0.08  | 0.13  | 0.20   | 0.35   |
| 0.49 | 23.97    | 56.32    | 119.51    | 303.81    | 0.90 | 0.07  | 0.10  | 0.15   | 0.27   |
| 0.50 | 21.24    | 49.05    | 105.31    | 265.69    |      |       |       |        |        |

Table S181: Critical values for detector  $\hat{H}_{mov}^{m,0.1}$  with windows size  $n = 0.1$ , and IM-OLS estimation in a model with intercept and linear trend. The number of integrated regressors is 1 and the highest power of  $x_{kt}$  is 2.

| m    | 90 %     | 95 %     | 97,5 %   | 99 %      | m    | 90 %  | 95 %  | 97,5 % | 99 %  |
|------|----------|----------|----------|-----------|------|-------|-------|--------|-------|
| 0.10 | 19127.28 | 43930.89 | 88909.36 | 202229.75 | 0.51 | 11.12 | 22.76 | 45.01  | 99.13 |
| 0.11 | 13386.11 | 30448.80 | 63610.93 | 144786.20 | 0.52 | 9.76  | 20.09 | 38.76  | 85.16 |
| 0.12 | 9569.80  | 22270.60 | 45179.60 | 105180.24 | 0.53 | 8.55  | 17.34 | 33.25  | 73.90 |
| 0.13 | 6955.14  | 15663.80 | 33089.47 | 77598.19  | 0.54 | 7.52  | 15.27 | 29.50  | 65.04 |
| 0.14 | 5253.55  | 11832.08 | 24520.31 | 57537.44  | 0.55 | 6.62  | 13.30 | 25.80  | 56.73 |
| 0.15 | 3987.24  | 9081.27  | 18817.62 | 42500.92  | 0.56 | 5.89  | 11.84 | 22.27  | 50.49 |
| 0.16 | 3093.38  | 7012.91  | 14345.60 | 32512.55  | 0.57 | 5.23  | 10.24 | 19.86  | 43.58 |
| 0.17 | 2398.38  | 5414.43  | 11144.90 | 24795.42  | 0.58 | 4.55  | 8.99  | 17.11  | 36.98 |
| 0.18 | 1906.82  | 4281.54  | 8699.48  | 19565.48  | 0.59 | 4.04  | 7.81  | 14.84  | 32.64 |
| 0.19 | 1528.93  | 3388.35  | 7044.60  | 15713.30  | 0.60 | 3.51  | 6.83  | 13.13  | 27.92 |
| 0.20 | 1220.43  | 2730.51  | 5694.68  | 12728.36  | 0.61 | 3.09  | 5.97  | 11.17  | 23.92 |
| 0.21 | 990.69   | 2199.59  | 4622.13  | 10547.63  | 0.62 | 2.69  | 5.15  | 9.65   | 20.77 |
| 0.22 | 807.82   | 1806.83  | 3732.23  | 8505.42   | 0.63 | 2.36  | 4.46  | 8.39   | 18.18 |
| 0.23 | 672.28   | 1484.57  | 3114.63  | 6872.62   | 0.64 | 2.05  | 3.90  | 7.13   | 15.02 |
| 0.24 | 561.90   | 1233.14  | 2569.30  | 5982.60   | 0.65 | 1.80  | 3.38  | 6.25   | 12.93 |
| 0.25 | 462.75   | 1038.50  | 2156.80  | 4915.19   | 0.66 | 1.56  | 2.92  | 5.41   | 11.23 |
| 0.26 | 392.62   | 865.43   | 1766.91  | 4197.10   | 0.67 | 1.37  | 2.52  | 4.50   | 9.31  |
| 0.27 | 332.99   | 725.26   | 1469.82  | 3475.21   | 0.68 | 1.19  | 2.16  | 3.84   | 7.94  |
| 0.28 | 279.12   | 614.00   | 1248.33  | 2917.67   | 0.69 | 1.05  | 1.87  | 3.30   | 6.71  |
| 0.29 | 236.31   | 524.12   | 1060.01  | 2397.98   | 0.70 | 0.90  | 1.62  | 2.83   | 5.60  |
| 0.30 | 201.18   | 440.45   | 884.69   | 2107.29   | 0.71 | 0.78  | 1.40  | 2.41   | 4.79  |
| 0.31 | 171.99   | 377.36   | 786.30   | 1793.89   | 0.72 | 0.68  | 1.21  | 2.05   | 4.05  |
| 0.32 | 147.27   | 320.20   | 655.85   | 1527.00   | 0.73 | 0.59  | 1.04  | 1.76   | 3.48  |
| 0.33 | 127.29   | 277.48   | 558.00   | 1315.85   | 0.74 | 0.51  | 0.89  | 1.50   | 2.83  |
| 0.34 | 108.91   | 235.99   | 492.40   | 1109.69   | 0.75 | 0.44  | 0.75  | 1.26   | 2.35  |
| 0.35 | 94.44    | 202.21   | 415.82   | 965.63    | 0.76 | 0.38  | 0.64  | 1.05   | 2.01  |
| 0.36 | 82.09    | 176.72   | 350.10   | 813.22    | 0.77 | 0.32  | 0.54  | 0.89   | 1.70  |
| 0.37 | 70.84    | 152.22   | 302.97   | 708.22    | 0.78 | 0.27  | 0.45  | 0.74   | 1.37  |
| 0.38 | 60.96    | 132.75   | 261.40   | 617.23    | 0.79 | 0.23  | 0.38  | 0.60   | 1.09  |
| 0.39 | 53.21    | 112.82   | 227.35   | 524.60    | 0.80 | 0.20  | 0.32  | 0.50   | 0.89  |
| 0.40 | 46.16    | 98.88    | 197.75   | 448.03    | 0.81 | 0.17  | 0.26  | 0.41   | 0.72  |
| 0.41 | 40.82    | 86.55    | 169.87   | 386.55    | 0.82 | 0.14  | 0.22  | 0.34   | 0.58  |
| 0.42 | 35.76    | 76.21    | 151.20   | 335.04    | 0.83 | 0.12  | 0.18  | 0.27   | 0.46  |
| 0.43 | 31.23    | 66.89    | 128.62   | 288.16    | 0.84 | 0.10  | 0.15  | 0.22   | 0.36  |
| 0.44 | 27.59    | 58.01    | 112.53   | 254.82    | 0.85 | 0.08  | 0.12  | 0.17   | 0.29  |
| 0.45 | 24.08    | 50.64    | 99.82    | 220.04    | 0.86 | 0.07  | 0.10  | 0.14   | 0.22  |
| 0.46 | 21.00    | 44.16    | 87.40    | 193.08    | 0.87 | 0.06  | 0.08  | 0.11   | 0.17  |
| 0.47 | 18.62    | 38.64    | 76.22    | 167.13    | 0.88 | 0.05  | 0.07  | 0.09   | 0.14  |
| 0.48 | 16.30    | 34.16    | 66.77    | 145.64    | 0.89 | 0.04  | 0.06  | 0.08   | 0.11  |
| 0.49 | 14.40    | 29.68    | 58.74    | 128.00    | 0.90 | 0.04  | 0.05  | 0.06   | 0.09  |
| 0.50 | 12.55    | 26.04    | 50.90    | 112.71    |      |       |       |        |       |

Table S182: Critical values for detector  $\hat{H}_{mov}^{m,0.2}$  with windows size  $n = 0.2$ , and FM-OLS and D-OLS estimation in a model with intercept and linear trend. The number of integrated regressors is 1 and the highest power of  $x_{kt}$  is 2.

| m    | 90 %     | 95 %      | 97,5 %    | 99 %      | m    | 90 %  | 95 %  | 97,5 % | 99 %   |
|------|----------|-----------|-----------|-----------|------|-------|-------|--------|--------|
| 0.10 | 48822.58 | 123291.19 | 274335.14 | 700189.67 | 0.51 | 26.12 | 59.59 | 127.40 | 321.46 |
| 0.11 | 34997.05 | 86011.11  | 193293.63 | 491811.27 | 0.52 | 22.95 | 52.33 | 113.65 | 277.45 |
| 0.12 | 24718.13 | 62324.77  | 140635.39 | 353672.68 | 0.53 | 20.00 | 45.77 | 97.39  | 249.11 |
| 0.13 | 18099.18 | 44668.12  | 100837.21 | 252043.00 | 0.54 | 17.56 | 39.98 | 84.85  | 216.33 |
| 0.14 | 13298.54 | 33687.59  | 75393.98  | 188675.85 | 0.55 | 15.40 | 35.18 | 74.44  | 183.73 |
| 0.15 | 10055.18 | 25142.48  | 57001.03  | 143264.22 | 0.56 | 13.56 | 30.55 | 64.60  | 159.48 |
| 0.16 | 7828.51  | 19737.82  | 43774.05  | 109099.99 | 0.57 | 11.91 | 26.58 | 56.14  | 140.67 |
| 0.17 | 6079.53  | 15184.89  | 33530.35  | 83848.66  | 0.58 | 10.45 | 23.08 | 49.19  | 123.15 |
| 0.18 | 4810.91  | 11944.80  | 26609.44  | 66349.22  | 0.59 | 9.16  | 20.16 | 43.06  | 108.08 |
| 0.19 | 3811.96  | 9380.55   | 20939.74  | 50539.08  | 0.60 | 8.07  | 17.78 | 37.96  | 93.41  |
| 0.20 | 3058.24  | 7481.83   | 17000.36  | 42520.31  | 0.61 | 7.04  | 15.54 | 32.68  | 79.17  |
| 0.21 | 2466.18  | 6113.82   | 13674.21  | 34066.18  | 0.62 | 6.16  | 13.43 | 27.97  | 67.60  |
| 0.22 | 2016.05  | 4911.89   | 11056.09  | 27963.48  | 0.63 | 5.43  | 11.74 | 24.22  | 58.92  |
| 0.23 | 1656.44  | 4119.52   | 9194.09   | 23276.39  | 0.64 | 4.74  | 10.18 | 21.25  | 50.88  |
| 0.24 | 1385.32  | 3438.02   | 7730.39   | 19154.35  | 0.65 | 4.15  | 8.88  | 18.15  | 43.56  |
| 0.25 | 1177.38  | 2876.70   | 6452.50   | 16374.58  | 0.66 | 3.60  | 7.69  | 15.56  | 37.43  |
| 0.26 | 982.54   | 2404.51   | 5367.93   | 13327.99  | 0.67 | 3.15  | 6.62  | 13.34  | 31.70  |
| 0.27 | 827.12   | 2011.20   | 4434.37   | 10989.52  | 0.68 | 2.73  | 5.73  | 11.52  | 26.37  |
| 0.28 | 695.95   | 1692.50   | 3729.33   | 9257.71   | 0.69 | 2.38  | 4.94  | 9.78   | 21.93  |
| 0.29 | 582.16   | 1435.50   | 3152.68   | 7785.03   | 0.70 | 2.08  | 4.21  | 8.37   | 18.55  |
| 0.30 | 497.11   | 1188.13   | 2674.33   | 6577.66   | 0.71 | 1.80  | 3.63  | 7.01   | 15.60  |
| 0.31 | 422.10   | 1037.30   | 2311.99   | 5797.87   | 0.72 | 1.57  | 3.10  | 6.01   | 13.25  |
| 0.32 | 363.62   | 898.10    | 1961.45   | 4841.90   | 0.73 | 1.35  | 2.64  | 5.07   | 11.15  |
| 0.33 | 312.39   | 759.17    | 1672.99   | 4112.87   | 0.74 | 1.17  | 2.25  | 4.25   | 9.14   |
| 0.34 | 266.53   | 648.97    | 1444.83   | 3507.77   | 0.75 | 1.00  | 1.91  | 3.54   | 7.60   |
| 0.35 | 227.48   | 546.14    | 1219.01   | 3081.13   | 0.76 | 0.86  | 1.62  | 2.99   | 6.41   |
| 0.36 | 196.80   | 466.89    | 1049.13   | 2630.78   | 0.77 | 0.73  | 1.39  | 2.51   | 5.27   |
| 0.37 | 168.83   | 408.93    | 919.32    | 2291.09   | 0.78 | 0.63  | 1.17  | 2.12   | 4.38   |
| 0.38 | 146.28   | 353.14    | 796.79    | 2061.65   | 0.79 | 0.54  | 0.98  | 1.77   | 3.56   |
| 0.39 | 127.53   | 303.24    | 683.76    | 1800.33   | 0.80 | 0.45  | 0.82  | 1.46   | 2.90   |
| 0.40 | 111.21   | 265.37    | 594.60    | 1521.19   | 0.81 | 0.38  | 0.68  | 1.20   | 2.36   |
| 0.41 | 96.26    | 232.87    | 511.56    | 1310.78   | 0.82 | 0.32  | 0.57  | 0.98   | 1.93   |
| 0.42 | 84.59    | 201.79    | 444.50    | 1129.52   | 0.83 | 0.27  | 0.47  | 0.80   | 1.59   |
| 0.43 | 74.02    | 177.38    | 385.79    | 971.16    | 0.84 | 0.23  | 0.38  | 0.64   | 1.27   |
| 0.44 | 64.81    | 156.52    | 341.28    | 855.94    | 0.85 | 0.19  | 0.31  | 0.52   | 0.99   |
| 0.45 | 57.01    | 135.62    | 293.56    | 754.93    | 0.86 | 0.16  | 0.25  | 0.41   | 0.78   |
| 0.46 | 50.18    | 118.59    | 253.24    | 650.58    | 0.87 | 0.13  | 0.21  | 0.33   | 0.60   |
| 0.47 | 43.84    | 103.63    | 219.23    | 553.87    | 0.88 | 0.10  | 0.17  | 0.26   | 0.46   |
| 0.48 | 38.34    | 90.67     | 190.45    | 469.89    | 0.89 | 0.09  | 0.13  | 0.21   | 0.36   |
| 0.49 | 33.53    | 78.10     | 166.10    | 414.30    | 0.90 | 0.07  | 0.11  | 0.16   | 0.27   |
| 0.50 | 29.47    | 67.66     | 146.31    | 363.70    |      |       |       |        |        |

Table S183: Critical values for detector  $\hat{H}_{mov}^{m,0.2}$  with windows size  $n = 0.2$ , and IM-OLS estimation in a model with intercept and linear trend. The number of integrated regressors is 1 and the highest power of  $x_{kt}$  is 2.



| m    | 90 %     | 95 %     | 97,5 %   | 99 %      | m    | 90 %  | 95 %  | 97,5 % | 99 %   |
|------|----------|----------|----------|-----------|------|-------|-------|--------|--------|
| 0.10 | 20887.91 | 47659.10 | 97376.28 | 221136.29 | 0.51 | 12.19 | 24.81 | 48.52  | 106.63 |
| 0.11 | 14676.09 | 33204.78 | 70179.22 | 159199.70 | 0.52 | 10.66 | 21.72 | 41.63  | 90.87  |
| 0.12 | 10483.17 | 24458.51 | 49689.40 | 116165.71 | 0.53 | 9.32  | 18.77 | 35.74  | 78.24  |
| 0.13 | 7663.61  | 17171.45 | 36539.54 | 85866.74  | 0.54 | 8.18  | 16.41 | 31.73  | 69.59  |
| 0.14 | 5780.54  | 13011.63 | 27052.52 | 64075.78  | 0.55 | 7.20  | 14.31 | 27.50  | 60.46  |
| 0.15 | 4407.30  | 10026.76 | 20757.72 | 47373.69  | 0.56 | 6.35  | 12.66 | 23.70  | 53.02  |
| 0.16 | 3422.50  | 7767.71  | 15860.79 | 36403.89  | 0.57 | 5.64  | 11.00 | 21.03  | 45.90  |
| 0.17 | 2660.89  | 5976.35  | 12361.29 | 27630.67  | 0.58 | 4.89  | 9.59  | 18.18  | 38.95  |
| 0.18 | 2114.94  | 4748.06  | 9671.36  | 22016.54  | 0.59 | 4.33  | 8.31  | 15.63  | 34.30  |
| 0.19 | 1703.68  | 3762.23  | 7809.90  | 17698.94  | 0.60 | 3.75  | 7.26  | 13.83  | 29.14  |
| 0.20 | 1359.00  | 3027.22  | 6333.55  | 14327.40  | 0.61 | 3.28  | 6.31  | 11.72  | 25.00  |
| 0.21 | 1104.20  | 2449.42  | 5130.24  | 11809.86  | 0.62 | 2.85  | 5.43  | 10.08  | 21.51  |
| 0.22 | 906.35   | 2013.24  | 4159.26  | 9551.18   | 0.63 | 2.49  | 4.70  | 8.77   | 18.85  |
| 0.23 | 755.74   | 1663.16  | 3464.91  | 7792.29   | 0.64 | 2.15  | 4.08  | 7.41   | 15.44  |
| 0.24 | 627.06   | 1376.70  | 2868.01  | 6738.03   | 0.65 | 1.88  | 3.51  | 6.47   | 13.29  |
| 0.25 | 519.32   | 1162.92  | 2414.93  | 5571.98   | 0.66 | 1.63  | 3.03  | 5.56   | 11.53  |
| 0.26 | 439.41   | 963.85   | 1977.53  | 4675.96   | 0.67 | 1.43  | 2.60  | 4.64   | 9.46   |
| 0.27 | 373.74   | 812.10   | 1645.90  | 3892.09   | 0.68 | 1.24  | 2.22  | 3.94   | 8.12   |
| 0.28 | 311.87   | 685.05   | 1389.74  | 3258.70   | 0.69 | 1.08  | 1.92  | 3.36   | 6.82   |
| 0.29 | 264.58   | 584.90   | 1184.30  | 2683.42   | 0.70 | 0.93  | 1.65  | 2.88   | 5.67   |
| 0.30 | 224.96   | 494.04   | 988.63   | 2366.73   | 0.71 | 0.80  | 1.42  | 2.44   | 4.83   |
| 0.31 | 193.68   | 421.33   | 882.33   | 2005.33   | 0.72 | 0.69  | 1.22  | 2.08   | 4.11   |
| 0.32 | 165.54   | 355.76   | 728.02   | 1720.22   | 0.73 | 0.60  | 1.05  | 1.77   | 3.50   |
| 0.33 | 142.49   | 309.37   | 620.16   | 1471.48   | 0.74 | 0.52  | 0.90  | 1.51   | 2.85   |
| 0.34 | 122.04   | 263.49   | 545.22   | 1241.87   | 0.75 | 0.44  | 0.76  | 1.26   | 2.37   |
| 0.35 | 105.72   | 226.20   | 464.21   | 1082.08   | 0.76 | 0.38  | 0.64  | 1.05   | 2.01   |
| 0.36 | 91.78    | 196.08   | 390.17   | 906.46    | 0.77 | 0.32  | 0.54  | 0.89   | 1.70   |
| 0.37 | 78.92    | 169.39   | 335.82   | 789.11    | 0.78 | 0.28  | 0.46  | 0.74   | 1.37   |
| 0.38 | 67.81    | 147.41   | 290.11   | 685.26    | 0.79 | 0.24  | 0.38  | 0.61   | 1.09   |
| 0.39 | 59.30    | 125.24   | 251.46   | 582.63    | 0.80 | 0.20  | 0.32  | 0.50   | 0.90   |
| 0.40 | 51.70    | 110.24   | 218.59   | 500.58    | 0.81 | 0.17  | 0.27  | 0.41   | 0.72   |
| 0.41 | 45.33    | 95.74    | 188.45   | 425.81    | 0.82 | 0.15  | 0.22  | 0.34   | 0.58   |
| 0.42 | 39.65    | 83.83    | 167.49   | 371.55    | 0.83 | 0.13  | 0.19  | 0.27   | 0.46   |
| 0.43 | 34.57    | 74.08    | 142.25   | 318.42    | 0.84 | 0.11  | 0.16  | 0.22   | 0.37   |
| 0.44 | 30.61    | 63.75    | 124.11   | 275.07    | 0.85 | 0.09  | 0.13  | 0.18   | 0.29   |
| 0.45 | 26.60    | 55.72    | 108.82   | 239.71    | 0.86 | 0.08  | 0.11  | 0.15   | 0.23   |
| 0.46 | 23.24    | 48.55    | 95.81    | 211.37    | 0.87 | 0.07  | 0.10  | 0.13   | 0.18   |
| 0.47 | 20.55    | 42.42    | 83.57    | 181.04    | 0.88 | 0.06  | 0.08  | 0.11   | 0.15   |
| 0.48 | 17.93    | 37.34    | 72.43    | 158.56    | 0.89 | 0.06  | 0.07  | 0.09   | 0.13   |
| 0.49 | 15.79    | 32.42    | 64.08    | 138.69    | 0.90 | 0.05  | 0.07  | 0.08   | 0.11   |
| 0.50 | 13.80    | 28.46    | 55.57    | 121.22    |      |       |       |        |        |

Table S184: Critical values for detector  $\hat{H}_{mov}^{m,0.3}$  with windows size  $n = 0.3$ , and FM-OLS and D-OLS estimation in a model with intercept and linear trend. The number of integrated regressors is 1 and the highest power of  $x_{kt}$  is 2.

| m    | 90 %     | 95 %      | 97,5 %    | 99 %      | m    | 90 %  | 95 %  | 97,5 % | 99 %   |
|------|----------|-----------|-----------|-----------|------|-------|-------|--------|--------|
| 0.10 | 53139.14 | 133873.83 | 298557.58 | 754478.26 | 0.51 | 28.51 | 64.88 | 137.97 | 344.14 |
| 0.11 | 38082.42 | 93842.19  | 211980.98 | 540011.67 | 0.52 | 24.99 | 56.33 | 122.29 | 299.31 |
| 0.12 | 26781.65 | 67748.24  | 155779.16 | 389413.26 | 0.53 | 21.79 | 49.39 | 105.12 | 264.06 |
| 0.13 | 19788.61 | 48927.49  | 111050.45 | 279511.12 | 0.54 | 19.07 | 43.18 | 91.23  | 230.29 |
| 0.14 | 14572.69 | 37000.83  | 82733.02  | 209214.74 | 0.55 | 16.68 | 37.77 | 80.05  | 194.58 |
| 0.15 | 11068.10 | 27570.27  | 62891.86  | 158383.01 | 0.56 | 14.65 | 32.76 | 69.01  | 168.59 |
| 0.16 | 8608.34  | 21649.80  | 48255.72  | 120380.72 | 0.57 | 12.80 | 28.30 | 59.71  | 149.22 |
| 0.17 | 6710.62  | 16661.87  | 37140.53  | 93749.67  | 0.58 | 11.24 | 24.55 | 52.32  | 130.29 |
| 0.18 | 5321.26  | 13220.33  | 29330.50  | 74043.88  | 0.59 | 9.83  | 21.40 | 45.40  | 113.15 |
| 0.19 | 4206.85  | 10385.47  | 23217.19  | 56238.31  | 0.60 | 8.61  | 18.80 | 39.81  | 97.37  |
| 0.20 | 3392.85  | 8250.26   | 18837.25  | 47329.42  | 0.61 | 7.49  | 16.41 | 34.39  | 83.00  |
| 0.21 | 2734.74  | 6764.67   | 15175.91  | 37456.70  | 0.62 | 6.53  | 14.13 | 29.12  | 70.69  |
| 0.22 | 2235.76  | 5448.20   | 12327.45  | 30949.30  | 0.63 | 5.74  | 12.29 | 25.28  | 61.23  |
| 0.23 | 1837.88  | 4567.14   | 10271.77  | 25933.35  | 0.64 | 4.99  | 10.65 | 22.18  | 52.27  |
| 0.24 | 1540.29  | 3834.41   | 8600.86   | 21440.21  | 0.65 | 4.36  | 9.27  | 18.82  | 44.95  |
| 0.25 | 1305.41  | 3192.25   | 7177.06   | 18425.96  | 0.66 | 3.76  | 7.97  | 16.03  | 38.39  |
| 0.26 | 1094.09  | 2672.99   | 5987.35   | 15063.96  | 0.67 | 3.28  | 6.84  | 13.72  | 32.44  |
| 0.27 | 918.80   | 2231.87   | 4946.15   | 12400.25  | 0.68 | 2.84  | 5.89  | 11.81  | 26.96  |
| 0.28 | 775.25   | 1883.43   | 4161.48   | 10402.16  | 0.69 | 2.47  | 5.07  | 10.05  | 22.32  |
| 0.29 | 650.08   | 1602.06   | 3522.46   | 8688.60   | 0.70 | 2.13  | 4.30  | 8.52   | 18.86  |
| 0.30 | 553.18   | 1331.20   | 2981.77   | 7377.22   | 0.71 | 1.85  | 3.71  | 7.11   | 15.81  |
| 0.31 | 470.96   | 1152.28   | 2554.68   | 6427.01   | 0.72 | 1.60  | 3.17  | 6.08   | 13.35  |
| 0.32 | 404.09   | 1001.10   | 2173.58   | 5422.31   | 0.73 | 1.38  | 2.68  | 5.12   | 11.21  |
| 0.33 | 346.95   | 840.71    | 1872.60   | 4599.45   | 0.74 | 1.18  | 2.28  | 4.30   | 9.21   |
| 0.34 | 297.61   | 724.60    | 1597.15   | 3903.34   | 0.75 | 1.02  | 1.93  | 3.57   | 7.65   |
| 0.35 | 253.01   | 605.66    | 1350.32   | 3454.49   | 0.76 | 0.87  | 1.64  | 3.00   | 6.43   |
| 0.36 | 218.33   | 519.05    | 1162.35   | 2931.54   | 0.77 | 0.74  | 1.39  | 2.51   | 5.28   |
| 0.37 | 188.47   | 453.97    | 1019.12   | 2558.91   | 0.78 | 0.63  | 1.18  | 2.12   | 4.39   |
| 0.38 | 162.22   | 389.52    | 882.00    | 2277.32   | 0.79 | 0.54  | 0.98  | 1.77   | 3.57   |
| 0.39 | 141.17   | 336.06    | 755.49    | 1987.59   | 0.80 | 0.46  | 0.83  | 1.46   | 2.91   |
| 0.40 | 123.09   | 292.86    | 656.24    | 1693.50   | 0.81 | 0.39  | 0.68  | 1.20   | 2.37   |
| 0.41 | 106.51   | 257.62    | 568.05    | 1444.43   | 0.82 | 0.32  | 0.57  | 0.98   | 1.93   |
| 0.42 | 93.63    | 221.69    | 487.84    | 1240.30   | 0.83 | 0.27  | 0.47  | 0.80   | 1.59   |
| 0.43 | 81.85    | 195.55    | 424.57    | 1060.53   | 0.84 | 0.23  | 0.38  | 0.65   | 1.28   |
| 0.44 | 71.26    | 171.23    | 372.68    | 938.09    | 0.85 | 0.19  | 0.31  | 0.52   | 0.99   |
| 0.45 | 62.69    | 148.69    | 320.91    | 822.87    | 0.86 | 0.16  | 0.26  | 0.42   | 0.79   |
| 0.46 | 55.05    | 130.17    | 277.60    | 705.76    | 0.87 | 0.13  | 0.21  | 0.33   | 0.60   |
| 0.47 | 48.15    | 113.29    | 240.97    | 597.84    | 0.88 | 0.11  | 0.17  | 0.26   | 0.46   |
| 0.48 | 41.99    | 98.76     | 207.80    | 507.65    | 0.89 | 0.09  | 0.14  | 0.21   | 0.36   |
| 0.49 | 36.72    | 85.32     | 180.27    | 445.85    | 0.90 | 0.07  | 0.11  | 0.16   | 0.27   |
| 0.50 | 32.14    | 73.57     | 157.80    | 391.19    |      |       |       |        |        |

Table S185: Critical values for detector  $\hat{H}_{mov}^{m,0.3}$  with windows size  $n = 0.3$ , and IM-OLS estimation in a model with intercept and linear trend. The number of integrated regressors is 1 and the highest power of  $x_{kt}$  is 2.

| m    | 90 %      | 95 %       | 97,5 %     | 99 %        | m    | 90 %  | 95 %   | 97,5 % | 99 %    |
|------|-----------|------------|------------|-------------|------|-------|--------|--------|---------|
| 0.10 | 726131.77 | 2702149.58 | 7937771.87 | 25881942.01 | 0.51 | 64.38 | 235.41 | 659.33 | 2064.95 |
| 0.11 | 469652.87 | 1717828.70 | 5219497.66 | 16614933.10 | 0.52 | 55.07 | 201.63 | 571.81 | 1777.82 |
| 0.12 | 312671.98 | 1161434.67 | 3450431.78 | 11471862.77 | 0.53 | 47.06 | 172.90 | 486.06 | 1500.70 |
| 0.13 | 217660.85 | 809756.71  | 2452150.41 | 7981863.66  | 0.54 | 40.08 | 148.57 | 419.05 | 1278.99 |
| 0.14 | 150097.80 | 554641.89  | 1769059.19 | 5782312.13  | 0.55 | 33.56 | 123.95 | 348.45 | 1059.97 |
| 0.15 | 107737.91 | 394063.85  | 1183249.87 | 4037598.89  | 0.56 | 28.33 | 104.38 | 298.09 | 921.40  |
| 0.16 | 79259.60  | 282365.49  | 838241.77  | 2921344.00  | 0.57 | 23.56 | 85.33  | 245.92 | 762.13  |
| 0.17 | 59081.00  | 212645.73  | 637626.41  | 2120231.43  | 0.58 | 19.91 | 71.16  | 208.25 | 635.85  |
| 0.18 | 44394.84  | 162255.08  | 471606.38  | 1683397.19  | 0.59 | 16.90 | 59.47  | 172.44 | 533.11  |
| 0.19 | 33566.33  | 120189.21  | 358420.59  | 1215320.27  | 0.60 | 14.00 | 50.04  | 142.72 | 457.88  |
| 0.20 | 25697.25  | 92986.11   | 276011.32  | 941621.42   | 0.61 | 11.91 | 41.34  | 116.93 | 376.35  |
| 0.21 | 19984.97  | 72078.11   | 214526.46  | 717791.04   | 0.62 | 9.71  | 34.81  | 98.07  | 310.21  |
| 0.22 | 15633.96  | 56902.24   | 169213.04  | 566833.49   | 0.63 | 8.31  | 29.05  | 82.45  | 259.62  |
| 0.23 | 12317.36  | 45259.39   | 130463.18  | 432896.34   | 0.64 | 7.00  | 24.27  | 66.73  | 210.81  |
| 0.24 | 9810.43   | 35522.81   | 102940.86  | 336091.17   | 0.65 | 5.87  | 20.50  | 54.40  | 168.88  |
| 0.25 | 7656.17   | 27936.86   | 81318.79   | 273062.57   | 0.66 | 4.94  | 17.11  | 44.75  | 138.19  |
| 0.26 | 6199.19   | 22164.58   | 65123.87   | 219547.70   | 0.67 | 4.11  | 13.91  | 36.22  | 112.09  |
| 0.27 | 4960.95   | 17933.40   | 52805.87   | 168853.85   | 0.68 | 3.47  | 11.39  | 29.51  | 90.70   |
| 0.28 | 4042.71   | 14472.91   | 41766.21   | 131853.70   | 0.69 | 2.87  | 9.20   | 24.78  | 76.69   |
| 0.29 | 3252.62   | 11791.59   | 33883.27   | 109876.19   | 0.70 | 2.36  | 7.73   | 20.00  | 60.48   |
| 0.30 | 2652.74   | 9675.11    | 28188.71   | 90012.22    | 0.71 | 1.95  | 6.34   | 16.61  | 48.78   |
| 0.31 | 2205.18   | 8058.22    | 22745.75   | 74639.65    | 0.72 | 1.62  | 5.11   | 13.59  | 40.95   |
| 0.32 | 1824.82   | 6670.73    | 19228.40   | 61477.27    | 0.73 | 1.33  | 4.22   | 10.81  | 31.99   |
| 0.33 | 1496.11   | 5545.94    | 15977.86   | 50570.41    | 0.74 | 1.08  | 3.46   | 8.77   | 25.39   |
| 0.34 | 1233.67   | 4520.08    | 13304.22   | 42044.97    | 0.75 | 0.89  | 2.81   | 7.27   | 20.34   |
| 0.35 | 1036.30   | 3744.60    | 10917.37   | 35457.67    | 0.76 | 0.74  | 2.23   | 5.76   | 16.04   |
| 0.36 | 872.56    | 3171.64    | 9128.19    | 29859.77    | 0.77 | 0.60  | 1.80   | 4.59   | 12.48   |
| 0.37 | 719.61    | 2647.56    | 7678.90    | 24877.61    | 0.78 | 0.48  | 1.44   | 3.61   | 9.63    |
| 0.38 | 598.07    | 2228.19    | 6381.37    | 20226.52    | 0.79 | 0.40  | 1.16   | 2.86   | 7.59    |
| 0.39 | 493.71    | 1834.14    | 5266.03    | 16708.11    | 0.80 | 0.32  | 0.91   | 2.21   | 6.02    |
| 0.40 | 419.08    | 1545.15    | 4392.41    | 14286.39    | 0.81 | 0.25  | 0.71   | 1.70   | 4.62    |
| 0.41 | 348.45    | 1292.25    | 3735.74    | 11900.39    | 0.82 | 0.20  | 0.56   | 1.32   | 3.55    |
| 0.42 | 293.91    | 1077.90    | 3144.00    | 9912.28     | 0.83 | 0.16  | 0.42   | 1.01   | 2.67    |
| 0.43 | 250.29    | 905.88     | 2684.12    | 8222.48     | 0.84 | 0.13  | 0.33   | 0.77   | 2.01    |
| 0.44 | 208.20    | 753.68     | 2197.26    | 6722.35     | 0.85 | 0.10  | 0.25   | 0.57   | 1.43    |
| 0.45 | 179.66    | 636.50     | 1838.42    | 5745.56     | 0.86 | 0.08  | 0.19   | 0.42   | 1.03    |
| 0.46 | 151.47    | 548.84     | 1579.04    | 4815.88     | 0.87 | 0.06  | 0.14   | 0.31   | 0.74    |
| 0.47 | 127.75    | 459.03     | 1321.10    | 4229.07     | 0.88 | 0.05  | 0.10   | 0.21   | 0.51    |
| 0.48 | 107.76    | 385.39     | 1079.18    | 3431.07     | 0.89 | 0.04  | 0.07   | 0.15   | 0.35    |
| 0.49 | 91.32     | 325.49     | 918.82     | 2834.86     | 0.90 | 0.03  | 0.05   | 0.10   | 0.24    |
| 0.50 | 77.34     | 278.68     | 781.60     | 2443.26     |      |       |        |        |         |

Table S186: Critical values for detector  $\hat{H}_{mov}^{m,0.1}$  with windows size  $n = 0.1$ , and FM-OLS and D-OLS estimation in a model with intercept. The number of integrated regressors is 1 and the highest power of  $x_{kt}$  is 3.

| m    | 90 %       | 95 %        | 97,5 %      | 99 %         | m    | 90 %   | 95 %    | 97,5 %  | 99 %     |
|------|------------|-------------|-------------|--------------|------|--------|---------|---------|----------|
| 0.10 | 3814304.56 | 15672752.47 | 52756743.75 | 197828460.88 | 0.51 | 321.60 | 1269.06 | 4069.56 | 15547.97 |
| 0.11 | 2482637.94 | 10136179.25 | 34125399.48 | 126133615.70 | 0.52 | 271.49 | 1069.31 | 3455.55 | 13240.88 |
| 0.12 | 1668595.95 | 6811325.54  | 21930149.85 | 79909367.85  | 0.53 | 230.86 | 901.36  | 2921.02 | 11489.10 |
| 0.13 | 1133653.12 | 4716277.50  | 15097622.96 | 53805110.48  | 0.54 | 192.60 | 773.25  | 2460.83 | 9240.66  |
| 0.14 | 796610.53  | 3317979.53  | 10644295.60 | 39200668.49  | 0.55 | 165.16 | 653.53  | 2039.34 | 7853.69  |
| 0.15 | 568634.34  | 2382739.50  | 7767985.08  | 29055435.26  | 0.56 | 139.63 | 555.71  | 1732.21 | 6555.96  |
| 0.16 | 414755.25  | 1702581.16  | 5500676.99  | 21182017.61  | 0.57 | 119.21 | 470.31  | 1477.66 | 5409.04  |
| 0.17 | 305526.30  | 1265129.26  | 4205548.49  | 15600113.36  | 0.58 | 99.92  | 397.70  | 1269.46 | 4589.80  |
| 0.18 | 230281.29  | 950795.77   | 3181786.08  | 11995710.00  | 0.59 | 83.87  | 331.52  | 1053.61 | 3899.87  |
| 0.19 | 175266.39  | 705250.90   | 2375754.60  | 8712663.43   | 0.60 | 69.46  | 275.25  | 894.33  | 3261.53  |
| 0.20 | 133972.78  | 534037.48   | 1838065.56  | 7021434.02   | 0.61 | 58.41  | 231.14  | 747.51  | 2703.78  |
| 0.21 | 101884.17  | 416253.48   | 1404965.63  | 5334937.43   | 0.62 | 49.35  | 195.55  | 609.97  | 2210.76  |
| 0.22 | 80271.32   | 329931.26   | 1080981.87  | 4196911.54   | 0.63 | 41.37  | 161.34  | 495.75  | 1832.25  |
| 0.23 | 64416.14   | 258360.69   | 869604.78   | 3241317.07   | 0.64 | 34.58  | 135.10  | 413.77  | 1493.53  |
| 0.24 | 50924.94   | 203512.36   | 685092.98   | 2562501.23   | 0.65 | 28.96  | 112.07  | 340.87  | 1179.16  |
| 0.25 | 40502.13   | 159465.44   | 527150.05   | 2008098.46   | 0.66 | 23.82  | 92.98   | 278.30  | 1014.58  |
| 0.26 | 32195.91   | 130345.06   | 414405.69   | 1570937.83   | 0.67 | 19.78  | 76.29   | 232.11  | 839.51   |
| 0.27 | 25695.21   | 105713.90   | 332984.65   | 1304954.96   | 0.68 | 16.58  | 63.04   | 186.25  | 659.18   |
| 0.28 | 20897.39   | 85816.87    | 273832.15   | 1030889.38   | 0.69 | 13.76  | 52.57   | 155.06  | 516.30   |
| 0.29 | 16960.19   | 68536.13    | 215083.37   | 815411.67    | 0.70 | 11.50  | 43.42   | 128.02  | 422.92   |
| 0.30 | 13812.25   | 56686.66    | 179355.65   | 670596.13    | 0.71 | 9.53   | 35.63   | 106.64  | 352.90   |
| 0.31 | 11370.78   | 47051.84    | 153251.64   | 558359.15    | 0.72 | 7.81   | 29.14   | 87.10   | 288.35   |
| 0.32 | 9421.29    | 39439.09    | 129717.97   | 476223.72    | 0.73 | 6.44   | 23.76   | 70.63   | 238.95   |
| 0.33 | 7745.85    | 33099.40    | 106560.46   | 390894.64    | 0.74 | 5.26   | 19.64   | 57.54   | 190.29   |
| 0.34 | 6447.21    | 27280.83    | 88176.79    | 314212.90    | 0.75 | 4.31   | 15.94   | 45.87   | 148.80   |
| 0.35 | 5322.09    | 22363.70    | 73098.97    | 265411.34    | 0.76 | 3.52   | 12.52   | 36.02   | 117.55   |
| 0.36 | 4447.91    | 18432.78    | 61267.47    | 224868.76    | 0.77 | 2.83   | 10.02   | 28.45   | 92.87    |
| 0.37 | 3645.61    | 15214.60    | 50914.23    | 183626.27    | 0.78 | 2.26   | 7.92    | 22.84   | 72.54    |
| 0.38 | 3095.51    | 12792.73    | 42931.28    | 157253.02    | 0.79 | 1.81   | 6.29    | 18.09   | 56.96    |
| 0.39 | 2598.33    | 10691.00    | 35821.73    | 130367.17    | 0.80 | 1.45   | 5.02    | 14.11   | 45.09    |
| 0.40 | 2160.81    | 9049.91     | 29244.03    | 109111.87    | 0.81 | 1.15   | 3.95    | 10.98   | 34.58    |
| 0.41 | 1801.92    | 7410.69     | 24177.37    | 93454.78     | 0.82 | 0.91   | 3.13    | 8.58    | 26.33    |
| 0.42 | 1512.54    | 6216.66     | 20371.88    | 74706.48     | 0.83 | 0.71   | 2.42    | 6.62    | 20.43    |
| 0.43 | 1261.00    | 5228.97     | 16782.98    | 61244.35     | 0.84 | 0.55   | 1.81    | 5.01    | 15.67    |
| 0.44 | 1059.96    | 4415.81     | 14036.76    | 51169.97     | 0.85 | 0.43   | 1.39    | 3.78    | 11.57    |
| 0.45 | 902.05     | 3681.76     | 11876.06    | 42839.59     | 0.86 | 0.33   | 1.04    | 2.75    | 8.30     |
| 0.46 | 751.60     | 3071.67     | 10040.52    | 36155.66     | 0.87 | 0.25   | 0.77    | 1.96    | 5.92     |
| 0.47 | 629.62     | 2584.84     | 8383.68     | 29429.56     | 0.88 | 0.19   | 0.56    | 1.39    | 4.14     |
| 0.48 | 528.99     | 2144.05     | 7104.33     | 25768.15     | 0.89 | 0.14   | 0.40    | 0.98    | 2.90     |
| 0.49 | 446.47     | 1811.47     | 5882.04     | 21348.04     | 0.90 | 0.11   | 0.28    | 0.67    | 1.92     |
| 0.50 | 377.37     | 1515.43     | 4842.20     | 18150.10     |      |        |         |         |          |

Table S187: Critical values for detector  $\hat{H}_{mov}^{m,0.1}$  with windows size  $n = 0.1$ , and IM-OLS estimation in a model with intercept. The number of integrated regressors is 1 and the highest power of  $x_{kt}$  is 3.

| m    | 90 %       | 95 %       | 97,5 %      | 99 %        | m    | 90 %  | 95 %   | 97,5 % | 99 %    |
|------|------------|------------|-------------|-------------|------|-------|--------|--------|---------|
| 0.10 | 1071800.03 | 4003791.97 | 11967034.86 | 39398216.05 | 0.51 | 87.00 | 314.09 | 868.53 | 2731.63 |
| 0.11 | 692917.13  | 2562497.99 | 7846985.83  | 25164653.14 | 0.52 | 73.72 | 266.86 | 748.02 | 2336.34 |
| 0.12 | 463415.06  | 1748062.76 | 5221305.05  | 16941627.46 | 0.53 | 62.70 | 229.85 | 634.96 | 1960.22 |
| 0.13 | 320137.15  | 1200718.55 | 3678333.63  | 11844128.84 | 0.54 | 52.94 | 196.92 | 542.47 | 1647.47 |
| 0.14 | 222087.46  | 826656.32  | 2614819.60  | 8642608.67  | 0.55 | 44.19 | 162.59 | 453.14 | 1382.23 |
| 0.15 | 159528.84  | 584493.89  | 1773782.17  | 6147528.54  | 0.56 | 37.49 | 135.45 | 382.41 | 1186.73 |
| 0.16 | 116405.24  | 420438.42  | 1243401.10  | 4331547.39  | 0.57 | 30.99 | 109.81 | 317.45 | 964.22  |
| 0.17 | 87885.11   | 316451.30  | 945139.67   | 3213842.20  | 0.58 | 25.93 | 91.55  | 266.89 | 803.35  |
| 0.18 | 65460.99   | 237968.93  | 690339.00   | 2489803.84  | 0.59 | 21.90 | 75.72  | 218.58 | 679.23  |
| 0.19 | 49127.81   | 178212.90  | 534537.51   | 1806082.69  | 0.60 | 18.16 | 63.34  | 180.18 | 572.81  |
| 0.20 | 37616.98   | 136804.73  | 408155.63   | 1384999.33  | 0.61 | 15.22 | 52.60  | 147.46 | 466.32  |
| 0.21 | 29414.06   | 106394.09  | 317152.42   | 1046265.65  | 0.62 | 12.42 | 43.54  | 121.53 | 379.42  |
| 0.22 | 23008.05   | 83916.56   | 250187.74   | 832630.32   | 0.63 | 10.62 | 36.28  | 101.68 | 311.13  |
| 0.23 | 18018.58   | 65860.14   | 190604.11   | 633358.66   | 0.64 | 8.85  | 30.08  | 82.39  | 257.08  |
| 0.24 | 14218.94   | 51850.51   | 150533.63   | 496954.40   | 0.65 | 7.37  | 25.37  | 66.66  | 201.09  |
| 0.25 | 11188.53   | 40725.10   | 120428.72   | 402985.51   | 0.66 | 6.13  | 20.97  | 54.68  | 161.99  |
| 0.26 | 8952.93    | 32263.41   | 95711.67    | 315401.56   | 0.67 | 5.03  | 16.75  | 43.83  | 132.86  |
| 0.27 | 7124.70    | 26215.57   | 76994.56    | 245071.45   | 0.68 | 4.27  | 13.68  | 35.21  | 105.71  |
| 0.28 | 5873.72    | 20903.23   | 59844.32    | 190647.83   | 0.69 | 3.47  | 11.13  | 29.26  | 88.86   |
| 0.29 | 4681.14    | 17093.94   | 48001.66    | 157391.24   | 0.70 | 2.84  | 9.18   | 23.23  | 69.72   |
| 0.30 | 3847.11    | 13946.50   | 40695.10    | 129969.15   | 0.71 | 2.33  | 7.43   | 19.00  | 55.78   |
| 0.31 | 3156.00    | 11560.68   | 32811.61    | 107503.01   | 0.72 | 1.92  | 5.98   | 15.54  | 45.73   |
| 0.32 | 2624.76    | 9509.74    | 27692.87    | 89315.70    | 0.73 | 1.57  | 4.84   | 12.30  | 35.61   |
| 0.33 | 2124.43    | 7924.15    | 22713.48    | 71430.37    | 0.74 | 1.27  | 3.94   | 9.81   | 28.16   |
| 0.34 | 1765.50    | 6466.92    | 19039.30    | 60311.98    | 0.75 | 1.03  | 3.16   | 8.04   | 22.42   |
| 0.35 | 1474.28    | 5301.70    | 15570.15    | 51046.00    | 0.76 | 0.84  | 2.50   | 6.32   | 17.39   |
| 0.36 | 1239.02    | 4492.89    | 12918.39    | 42523.12    | 0.77 | 0.68  | 2.01   | 4.96   | 13.45   |
| 0.37 | 1010.22    | 3750.42    | 10844.34    | 34672.47    | 0.78 | 0.54  | 1.56   | 3.89   | 10.38   |
| 0.38 | 840.88     | 3138.28    | 9017.47     | 28692.56    | 0.79 | 0.44  | 1.25   | 3.06   | 8.01    |
| 0.39 | 696.47     | 2587.49    | 7414.52     | 23399.80    | 0.80 | 0.35  | 0.98   | 2.33   | 6.28    |
| 0.40 | 587.25     | 2148.27    | 6156.70     | 19906.25    | 0.81 | 0.28  | 0.76   | 1.79   | 4.79    |
| 0.41 | 484.00     | 1780.66    | 5182.12     | 16671.32    | 0.82 | 0.22  | 0.59   | 1.37   | 3.67    |
| 0.42 | 410.40     | 1492.72    | 4304.87     | 13742.83    | 0.83 | 0.17  | 0.44   | 1.04   | 2.72    |
| 0.43 | 346.03     | 1265.96    | 3671.41     | 11358.49    | 0.84 | 0.14  | 0.34   | 0.78   | 2.04    |
| 0.44 | 287.15     | 1044.08    | 3027.98     | 9292.31     | 0.85 | 0.12  | 0.26   | 0.58   | 1.44    |
| 0.45 | 247.19     | 885.37     | 2493.72     | 7897.93     | 0.86 | 0.10  | 0.19   | 0.42   | 1.04    |
| 0.46 | 207.23     | 745.12     | 2180.31     | 6547.77     | 0.87 | 0.08  | 0.15   | 0.31   | 0.75    |
| 0.47 | 174.73     | 620.96     | 1797.23     | 5621.69     | 0.88 | 0.07  | 0.12   | 0.21   | 0.51    |
| 0.48 | 147.99     | 523.33     | 1457.74     | 4558.66     | 0.89 | 0.06  | 0.10   | 0.16   | 0.36    |
| 0.49 | 124.63     | 440.53     | 1223.25     | 3789.68     | 0.90 | 0.05  | 0.08   | 0.12   | 0.24    |
| 0.50 | 104.62     | 371.89     | 1046.96     | 3305.70     |      |       |        |        |         |

Table S188: Critical values for detector  $\hat{H}_{mov}^{m,0.2}$  with windows size  $n = 0.2$ , and FM-OLS and D-OLS estimation in a model with intercept. The number of integrated regressors is 1 and the highest power of  $x_{kt}$  is 3.

| m    | 90 %       | 95 %        | 97,5 %      | 99 %         | m    | 90 %   | 95 %    | 97,5 %  | 99 %     |
|------|------------|-------------|-------------|--------------|------|--------|---------|---------|----------|
| 0.10 | 5655857.13 | 23464772.09 | 79706998.12 | 289089084.92 | 0.51 | 433.29 | 1698.60 | 5380.83 | 20340.94 |
| 0.11 | 3670649.49 | 15047533.14 | 51241051.57 | 189166736.87 | 0.52 | 362.91 | 1433.08 | 4512.80 | 17484.60 |
| 0.12 | 2446987.96 | 10248332.18 | 32664549.90 | 120027922.03 | 0.53 | 306.20 | 1206.25 | 3925.35 | 14877.40 |
| 0.13 | 1680046.09 | 6972449.40  | 22584626.38 | 80460353.34  | 0.54 | 256.66 | 1026.21 | 3233.01 | 12236.55 |
| 0.14 | 1176604.68 | 4939241.76  | 16051310.44 | 58257072.61  | 0.55 | 218.90 | 856.05  | 2671.31 | 10092.38 |
| 0.15 | 834282.48  | 3537706.08  | 11539530.51 | 43209520.82  | 0.56 | 183.26 | 728.55  | 2277.82 | 8278.28  |
| 0.16 | 612387.77  | 2522982.23  | 8276650.65  | 31302965.38  | 0.57 | 155.01 | 614.88  | 1881.25 | 6851.25  |
| 0.17 | 448058.40  | 1854543.46  | 6271373.77  | 23116877.45  | 0.58 | 129.42 | 511.16  | 1601.41 | 5793.74  |
| 0.18 | 334062.02  | 1407040.12  | 4700213.46  | 17826726.34  | 0.59 | 108.22 | 425.58  | 1333.14 | 4893.33  |
| 0.19 | 256211.20  | 1038301.37  | 3519476.95  | 13095159.68  | 0.60 | 88.98  | 354.16  | 1119.65 | 4094.27  |
| 0.20 | 196299.25  | 791651.34   | 2676745.70  | 10334814.69  | 0.61 | 74.35  | 291.50  | 939.86  | 3331.96  |
| 0.21 | 149599.37  | 610952.27   | 2078497.66  | 7869084.27   | 0.62 | 62.11  | 247.61  | 768.33  | 2741.15  |
| 0.22 | 116364.23  | 482079.87   | 1599669.39  | 6254493.29   | 0.63 | 52.13  | 200.89  | 619.18  | 2250.95  |
| 0.23 | 93572.85   | 382327.64   | 1275148.37  | 4769230.39   | 0.64 | 43.13  | 168.48  | 504.77  | 1811.08  |
| 0.24 | 73886.85   | 299327.84   | 990589.15   | 3753503.59   | 0.65 | 36.02  | 138.99  | 420.60  | 1437.13  |
| 0.25 | 58747.53   | 234408.67   | 759592.79   | 2936831.18   | 0.66 | 29.84  | 113.35  | 336.63  | 1205.57  |
| 0.26 | 46625.29   | 189869.99   | 596144.83   | 2315761.25   | 0.67 | 24.31  | 91.23   | 273.23  | 1013.77  |
| 0.27 | 36993.76   | 154842.99   | 493022.57   | 1897084.80   | 0.68 | 20.29  | 75.59   | 222.25  | 786.04   |
| 0.28 | 29930.71   | 123650.33   | 397074.80   | 1504965.18   | 0.69 | 16.79  | 63.01   | 182.76  | 609.51   |
| 0.29 | 24264.45   | 98912.92    | 314510.67   | 1189458.79   | 0.70 | 13.95  | 51.90   | 149.43  | 491.71   |
| 0.30 | 19716.52   | 80873.39    | 260139.59   | 952069.34    | 0.71 | 11.41  | 41.89   | 123.34  | 399.88   |
| 0.31 | 16253.58   | 68313.44    | 221710.57   | 815480.66    | 0.72 | 9.28   | 33.77   | 99.94   | 325.73   |
| 0.32 | 13434.63   | 56784.75    | 184463.22   | 678500.83    | 0.73 | 7.54   | 27.47   | 79.92   | 270.42   |
| 0.33 | 11052.42   | 47195.86    | 153561.24   | 557204.28    | 0.74 | 6.19   | 22.16   | 64.39   | 212.92   |
| 0.34 | 9164.49    | 39139.28    | 124949.86   | 449792.49    | 0.75 | 5.00   | 17.90   | 51.41   | 163.93   |
| 0.35 | 7513.26    | 31961.38    | 102644.44   | 373678.27    | 0.76 | 4.05   | 14.05   | 40.02   | 127.55   |
| 0.36 | 6242.88    | 26320.59    | 86942.22    | 317675.82    | 0.77 | 3.24   | 11.13   | 31.16   | 98.72    |
| 0.37 | 5158.49    | 21532.51    | 72018.30    | 258854.10    | 0.78 | 2.54   | 8.67    | 24.57   | 77.42    |
| 0.38 | 4313.68    | 18066.95    | 60491.21    | 221495.43    | 0.79 | 2.02   | 6.86    | 19.36   | 60.43    |
| 0.39 | 3636.88    | 15092.80    | 49764.77    | 184535.05    | 0.80 | 1.59   | 5.42    | 14.98   | 47.19    |
| 0.40 | 3039.06    | 12621.16    | 40674.72    | 153450.80    | 0.81 | 1.25   | 4.25    | 11.57   | 36.03    |
| 0.41 | 2517.08    | 10273.46    | 34383.53    | 130150.95    | 0.82 | 0.98   | 3.31    | 8.99    | 27.42    |
| 0.42 | 2089.23    | 8603.01     | 28385.45    | 106623.51    | 0.83 | 0.76   | 2.52    | 6.86    | 21.03    |
| 0.43 | 1760.36    | 7213.97     | 23407.01    | 85634.02     | 0.84 | 0.59   | 1.88    | 5.15    | 16.15    |
| 0.44 | 1445.54    | 6076.63     | 19413.35    | 71335.36     | 0.85 | 0.45   | 1.43    | 3.85    | 11.69    |
| 0.45 | 1246.05    | 4977.25     | 16156.25    | 59297.50     | 0.86 | 0.35   | 1.07    | 2.79    | 8.38     |
| 0.46 | 1030.73    | 4211.68     | 13659.70    | 49431.00     | 0.87 | 0.26   | 0.78    | 1.98    | 5.96     |
| 0.47 | 864.27     | 3530.69     | 11351.23    | 40469.52     | 0.88 | 0.20   | 0.57    | 1.40    | 4.15     |
| 0.48 | 719.23     | 2924.09     | 9524.68     | 34584.81     | 0.89 | 0.15   | 0.41    | 0.99    | 2.90     |
| 0.49 | 602.01     | 2446.43     | 7782.93     | 29258.63     | 0.90 | 0.11   | 0.29    | 0.67    | 1.92     |
| 0.50 | 508.87     | 2029.78     | 6402.88     | 23905.32     |      |        |         |         |          |

Table S189: Critical values for detector  $\hat{H}_{mov}^{m,0.2}$  with windows size  $n = 0.2$ , and IM-OLS estimation in a model with intercept. The number of integrated regressors is 1 and the highest power of  $x_{kt}$  is 3.

| m    | 90 %       | 95 %       | 97,5 %      | 99 %        | m    | 90 %  | 95 %   | 97,5 % | 99 %    |
|------|------------|------------|-------------|-------------|------|-------|--------|--------|---------|
| 0.10 | 1221452.30 | 4603774.66 | 13803035.49 | 45858652.58 | 0.51 | 93.68 | 334.19 | 919.20 | 2885.68 |
| 0.11 | 792209.66  | 2952952.40 | 9057819.14  | 29215098.70 | 0.52 | 78.62 | 284.99 | 782.15 | 2454.18 |
| 0.12 | 528090.36  | 1997152.94 | 6050349.60  | 19327667.38 | 0.53 | 67.16 | 244.07 | 670.52 | 2062.48 |
| 0.13 | 365055.67  | 1382523.61 | 4200446.12  | 13713435.16 | 0.54 | 56.72 | 209.10 | 571.29 | 1727.07 |
| 0.14 | 254012.28  | 940779.30  | 3007240.02  | 9844026.67  | 0.55 | 46.69 | 172.30 | 474.36 | 1437.17 |
| 0.15 | 183044.76  | 670760.53  | 2045276.16  | 7120728.24  | 0.56 | 39.77 | 142.14 | 400.92 | 1242.50 |
| 0.16 | 133489.31  | 482704.23  | 1430902.83  | 4982617.44  | 0.57 | 32.84 | 115.13 | 331.45 | 995.86  |
| 0.17 | 100184.28  | 362101.41  | 1083517.57  | 3710545.66  | 0.58 | 27.44 | 95.75  | 276.92 | 830.89  |
| 0.18 | 74334.32   | 270586.29  | 789420.05   | 2843006.77  | 0.59 | 22.99 | 78.75  | 224.92 | 705.65  |
| 0.19 | 55991.14   | 204190.60  | 610235.96   | 2062658.26  | 0.60 | 18.91 | 65.92  | 186.40 | 592.15  |
| 0.20 | 42781.21   | 155931.75  | 470675.96   | 1565733.63  | 0.61 | 15.85 | 54.50  | 153.06 | 477.78  |
| 0.21 | 33444.01   | 120820.58  | 362054.31   | 1187493.50  | 0.62 | 12.92 | 44.86  | 125.34 | 388.83  |
| 0.22 | 26007.89   | 95421.67   | 285315.93   | 954527.93   | 0.63 | 11.02 | 37.27  | 104.01 | 318.53  |
| 0.23 | 20449.41   | 75398.11   | 217297.24   | 722944.69   | 0.64 | 9.13  | 30.90  | 84.38  | 259.41  |
| 0.24 | 16100.67   | 59051.54   | 171648.45   | 561579.46   | 0.65 | 7.60  | 25.87  | 68.14  | 203.12  |
| 0.25 | 12791.60   | 46234.29   | 135484.16   | 461562.21   | 0.66 | 6.28  | 21.30  | 55.63  | 163.21  |
| 0.26 | 10141.01   | 36638.38   | 107603.39   | 351858.64   | 0.67 | 5.15  | 17.03  | 44.62  | 134.34  |
| 0.27 | 8107.56    | 29654.99   | 87602.10    | 277504.83   | 0.68 | 4.36  | 13.85  | 35.65  | 106.34  |
| 0.28 | 6588.20    | 23713.73   | 67343.46    | 212025.70   | 0.69 | 3.53  | 11.26  | 29.61  | 89.57   |
| 0.29 | 5254.43    | 19240.41   | 54274.14    | 175874.87   | 0.70 | 2.88  | 9.29   | 23.54  | 69.89   |
| 0.30 | 4314.71    | 15760.50   | 45262.00    | 145083.75   | 0.71 | 2.36  | 7.49   | 19.08  | 55.91   |
| 0.31 | 3550.48    | 12869.91   | 36810.85    | 120587.56   | 0.72 | 1.93  | 6.02   | 15.57  | 45.85   |
| 0.32 | 2906.14    | 10544.68   | 30844.42    | 100920.40   | 0.73 | 1.58  | 4.85   | 12.35  | 35.64   |
| 0.33 | 2362.91    | 8855.49    | 25457.88    | 79900.09    | 0.74 | 1.28  | 3.95   | 9.83   | 28.19   |
| 0.34 | 1955.86    | 7243.31    | 21186.99    | 66862.37    | 0.75 | 1.03  | 3.16   | 8.05   | 22.43   |
| 0.35 | 1647.35    | 5903.82    | 17373.68    | 57071.23    | 0.76 | 0.85  | 2.51   | 6.32   | 17.39   |
| 0.36 | 1371.22    | 4968.92    | 14205.82    | 46388.13    | 0.77 | 0.68  | 2.01   | 4.96   | 13.46   |
| 0.37 | 1122.73    | 4136.09    | 11928.25    | 37756.74    | 0.78 | 0.55  | 1.56   | 3.90   | 10.38   |
| 0.38 | 934.61     | 3431.71    | 10019.49    | 31101.09    | 0.79 | 0.45  | 1.25   | 3.06   | 8.02    |
| 0.39 | 769.40     | 2839.04    | 8164.77     | 25662.45    | 0.80 | 0.37  | 0.99   | 2.33   | 6.28    |
| 0.40 | 646.65     | 2351.78    | 6729.34     | 21567.01    | 0.81 | 0.29  | 0.76   | 1.80   | 4.79    |
| 0.41 | 533.15     | 1954.14    | 5647.89     | 18083.59    | 0.82 | 0.25  | 0.59   | 1.37   | 3.67    |
| 0.42 | 447.49     | 1635.51    | 4696.84     | 15037.29    | 0.83 | 0.21  | 0.45   | 1.04   | 2.72    |
| 0.43 | 379.48     | 1370.45    | 3958.31     | 12469.16    | 0.84 | 0.18  | 0.36   | 0.79   | 2.05    |
| 0.44 | 316.27     | 1142.43    | 3269.93     | 10062.48    | 0.85 | 0.15  | 0.28   | 0.58   | 1.44    |
| 0.45 | 269.46     | 956.20     | 2670.96     | 8595.14     | 0.86 | 0.13  | 0.23   | 0.43   | 1.05    |
| 0.46 | 224.94     | 808.97     | 2348.89     | 6979.70     | 0.87 | 0.12  | 0.19   | 0.33   | 0.75    |
| 0.47 | 189.83     | 670.58     | 1928.53     | 6022.80     | 0.88 | 0.10  | 0.16   | 0.25   | 0.52    |
| 0.48 | 160.02     | 559.35     | 1566.20     | 4836.37     | 0.89 | 0.09  | 0.14   | 0.21   | 0.38    |
| 0.49 | 135.83     | 472.59     | 1311.83     | 4038.10     | 0.90 | 0.08  | 0.12   | 0.18   | 0.28    |
| 0.50 | 112.82     | 398.81     | 1112.62     | 3506.34     |      |       |        |        |         |

Table S190: Critical values for detector  $\hat{H}_{mov}^{m,0.3}$  with windows size  $n = 0.3$ , and FM-OLS and D-OLS estimation in a model with intercept. The number of integrated regressors is 1 and the highest power of  $x_{kt}$  is 3.

| m    | 90 %       | 95 %        | 97,5 %      | 99 %         | m    | 90 %   | 95 %    | 97,5 %  | 99 %     |
|------|------------|-------------|-------------|--------------|------|--------|---------|---------|----------|
| 0.10 | 6481899.27 | 26912744.71 | 91804917.89 | 336409508.23 | 0.51 | 467.48 | 1801.16 | 5732.09 | 21640.38 |
| 0.11 | 4193012.01 | 17234948.29 | 58859189.31 | 219506507.42 | 0.52 | 388.96 | 1523.57 | 4815.54 | 18542.87 |
| 0.12 | 2793574.53 | 11672852.44 | 37740576.98 | 137977009.62 | 0.53 | 326.11 | 1277.70 | 4122.40 | 15692.87 |
| 0.13 | 1922216.61 | 8012066.53  | 25844393.45 | 93993515.72  | 0.54 | 273.23 | 1081.75 | 3426.03 | 12871.36 |
| 0.14 | 1346700.21 | 5661405.14  | 18498350.39 | 66315096.12  | 0.55 | 231.58 | 907.33  | 2822.86 | 10524.14 |
| 0.15 | 954866.58  | 4039099.09  | 13166346.75 | 49312021.03  | 0.56 | 195.29 | 762.39  | 2385.90 | 8702.76  |
| 0.16 | 697490.72  | 2883242.05  | 9524382.01  | 35579235.54  | 0.57 | 163.44 | 648.29  | 1976.92 | 7198.61  |
| 0.17 | 510649.52  | 2109570.09  | 7116761.90  | 26449435.98  | 0.58 | 135.98 | 535.97  | 1681.52 | 6034.18  |
| 0.18 | 379166.45  | 1603025.48  | 5381263.44  | 20429646.93  | 0.59 | 113.48 | 445.34  | 1382.87 | 5068.42  |
| 0.19 | 290958.89  | 1194306.16  | 4001633.21  | 15328081.83  | 0.60 | 93.15  | 370.32  | 1160.68 | 4246.85  |
| 0.20 | 220882.67  | 902705.12   | 3050822.06  | 11810765.82  | 0.61 | 77.48  | 302.08  | 972.69  | 3443.15  |
| 0.21 | 170336.77  | 693809.49   | 2338049.39  | 9084884.97   | 0.62 | 64.77  | 257.16  | 785.83  | 2839.73  |
| 0.22 | 131707.65  | 548380.17   | 1822712.40  | 7112145.13   | 0.63 | 54.20  | 206.39  | 635.65  | 2306.64  |
| 0.23 | 105616.81  | 431151.52   | 1445519.79  | 5448749.90   | 0.64 | 44.63  | 172.99  | 518.95  | 1854.22  |
| 0.24 | 83725.08   | 340836.71   | 1108130.61  | 4254437.13   | 0.65 | 37.16  | 142.16  | 428.91  | 1473.28  |
| 0.25 | 66453.23   | 265860.98   | 849573.88   | 3332442.20   | 0.66 | 30.75  | 115.86  | 341.69  | 1217.36  |
| 0.26 | 52832.95   | 214212.98   | 668006.04   | 2612500.44   | 0.67 | 24.99  | 92.75   | 277.88  | 1022.73  |
| 0.27 | 41460.51   | 175823.03   | 553140.17   | 2124034.64   | 0.68 | 20.66  | 76.72   | 225.42  | 792.39   |
| 0.28 | 33544.33   | 139705.77   | 449511.94   | 1689895.90   | 0.69 | 17.12  | 63.89   | 184.25  | 614.03   |
| 0.29 | 27283.80   | 111384.95   | 351687.97   | 1343915.45   | 0.70 | 14.20  | 52.54   | 151.01  | 496.07   |
| 0.30 | 21997.44   | 90920.93    | 292810.75   | 1072580.93   | 0.71 | 11.56  | 42.28   | 124.36  | 401.95   |
| 0.31 | 18201.86   | 76507.05    | 245173.29   | 897380.16    | 0.72 | 9.38   | 34.08   | 100.19  | 328.27   |
| 0.32 | 15058.28   | 63508.28    | 204086.13   | 745959.81    | 0.73 | 7.60   | 27.66   | 80.49   | 270.75   |
| 0.33 | 12332.34   | 52887.52    | 168618.43   | 609416.22    | 0.74 | 6.23   | 22.22   | 64.48   | 213.25   |
| 0.34 | 10168.87   | 43537.69    | 138448.34   | 500747.98    | 0.75 | 5.03   | 17.93   | 51.44   | 163.98   |
| 0.35 | 8355.69    | 35571.53    | 113470.71   | 411365.51    | 0.76 | 4.06   | 14.10   | 40.05   | 127.56   |
| 0.36 | 6915.62    | 29131.93    | 96124.27    | 350332.15    | 0.77 | 3.25   | 11.15   | 31.20   | 98.73    |
| 0.37 | 5701.63    | 23637.53    | 79872.00    | 286642.56    | 0.78 | 2.55   | 8.68    | 24.57   | 77.44    |
| 0.38 | 4754.48    | 19965.62    | 66288.31    | 241062.75    | 0.79 | 2.02   | 6.87    | 19.37   | 60.44    |
| 0.39 | 4035.76    | 16567.09    | 54926.38    | 200516.75    | 0.80 | 1.60   | 5.42    | 14.98   | 47.19    |
| 0.40 | 3356.86    | 13829.06    | 44606.38    | 167597.90    | 0.81 | 1.26   | 4.25    | 11.58   | 36.03    |
| 0.41 | 2760.95    | 11216.75    | 37574.25    | 141695.33    | 0.82 | 0.99   | 3.32    | 8.99    | 27.43    |
| 0.42 | 2307.08    | 9421.22     | 31052.71    | 116199.87    | 0.83 | 0.77   | 2.53    | 6.86    | 21.03    |
| 0.43 | 1931.30    | 7872.09     | 25543.85    | 93359.89     | 0.84 | 0.59   | 1.88    | 5.16    | 16.15    |
| 0.44 | 1578.24    | 6593.73     | 20913.66    | 77278.67     | 0.85 | 0.45   | 1.43    | 3.85    | 11.70    |
| 0.45 | 1353.72    | 5413.56     | 17477.47    | 64191.52     | 0.86 | 0.35   | 1.07    | 2.79    | 8.38     |
| 0.46 | 1120.92    | 4541.35     | 14675.65    | 53241.52     | 0.87 | 0.26   | 0.78    | 1.99    | 5.96     |
| 0.47 | 938.79     | 3810.75     | 12204.59    | 42967.33     | 0.88 | 0.20   | 0.57    | 1.40    | 4.15     |
| 0.48 | 777.12     | 3149.10     | 10210.03    | 37547.30     | 0.89 | 0.15   | 0.41    | 0.99    | 2.90     |
| 0.49 | 649.49     | 2633.90     | 8341.03     | 31178.70     | 0.90 | 0.12   | 0.29    | 0.67    | 1.93     |
| 0.50 | 549.82     | 2191.73     | 6879.87     | 25352.71     |      |        |         |         |          |

Table S191: Critical values for detector  $\hat{H}_{mov}^{m,0.3}$  with windows size  $n = 0.3$ , and IM-OLS estimation in a model with intercept. The number of integrated regressors is 1 and the highest power of  $x_{kt}$  is 3.



| m    | 90 %       | 95 %       | 97,5 %      | 99 %        | m    | 90 %  | 95 %   | 97,5 % | 99 %    |
|------|------------|------------|-------------|-------------|------|-------|--------|--------|---------|
| 0.10 | 1257320.39 | 4314069.31 | 11798940.19 | 35999622.58 | 0.51 | 73.83 | 259.96 | 708.69 | 2174.83 |
| 0.11 | 803867.75  | 2790119.72 | 7604146.91  | 22879082.86 | 0.52 | 62.47 | 221.48 | 604.68 | 1860.63 |
| 0.12 | 521965.67  | 1805096.78 | 5039155.33  | 15330326.89 | 0.53 | 52.85 | 187.97 | 517.16 | 1572.06 |
| 0.13 | 351288.06  | 1230480.60 | 3514369.79  | 10889236.63 | 0.54 | 45.36 | 161.54 | 438.48 | 1318.82 |
| 0.14 | 239137.89  | 832489.40  | 2407947.09  | 7582677.54  | 0.55 | 37.62 | 134.75 | 364.60 | 1123.30 |
| 0.15 | 169040.49  | 571262.46  | 1658533.75  | 5423129.83  | 0.56 | 32.13 | 112.53 | 314.36 | 967.80  |
| 0.16 | 120063.13  | 404285.12  | 1137542.02  | 3710907.95  | 0.57 | 26.76 | 93.86  | 261.45 | 785.02  |
| 0.17 | 88919.80   | 299179.01  | 829326.37   | 2678134.97  | 0.58 | 22.32 | 77.51  | 220.34 | 651.41  |
| 0.18 | 65384.10   | 222651.12  | 615513.01   | 2100464.91  | 0.59 | 18.73 | 64.32  | 182.33 | 553.54  |
| 0.19 | 49101.35   | 166386.27  | 467159.23   | 1548130.70  | 0.60 | 15.46 | 52.83  | 152.34 | 471.10  |
| 0.20 | 37409.06   | 125061.74  | 355481.38   | 1150300.50  | 0.61 | 13.18 | 45.11  | 123.90 | 392.00  |
| 0.21 | 28363.00   | 97065.40   | 275006.66   | 885051.20   | 0.62 | 10.96 | 36.97  | 105.18 | 324.15  |
| 0.22 | 21918.45   | 74822.66   | 216427.56   | 693513.82   | 0.63 | 9.32  | 31.16  | 85.92  | 264.99  |
| 0.23 | 16996.69   | 59061.13   | 162581.66   | 522953.42   | 0.64 | 7.80  | 26.26  | 72.24  | 217.85  |
| 0.24 | 13365.58   | 45747.42   | 129084.33   | 406233.34   | 0.65 | 6.53  | 21.67  | 57.75  | 174.74  |
| 0.25 | 10337.59   | 35950.98   | 100430.13   | 324435.74   | 0.66 | 5.53  | 17.97  | 47.10  | 143.65  |
| 0.26 | 8221.80    | 28693.26   | 80636.98    | 251394.16   | 0.67 | 4.57  | 14.68  | 39.01  | 118.62  |
| 0.27 | 6592.56    | 22567.94   | 64312.58    | 202026.63   | 0.68 | 3.87  | 12.15  | 31.38  | 93.98   |
| 0.28 | 5334.58    | 18047.56   | 50278.81    | 152905.00   | 0.69 | 3.17  | 9.92   | 26.44  | 80.35   |
| 0.29 | 4299.43    | 14459.23   | 40773.54    | 128833.37   | 0.70 | 2.62  | 8.26   | 21.26  | 62.93   |
| 0.30 | 3434.75    | 11856.27   | 33370.81    | 105538.31   | 0.71 | 2.19  | 6.83   | 17.63  | 50.91   |
| 0.31 | 2810.22    | 9751.69    | 27114.66    | 84244.20    | 0.72 | 1.82  | 5.58   | 14.20  | 43.16   |
| 0.32 | 2277.27    | 8147.59    | 22403.72    | 70107.90    | 0.73 | 1.51  | 4.53   | 11.27  | 33.81   |
| 0.33 | 1883.81    | 6706.83    | 18582.83    | 58088.17    | 0.74 | 1.25  | 3.68   | 9.29   | 26.45   |
| 0.34 | 1541.39    | 5459.00    | 15404.01    | 47532.48    | 0.75 | 1.03  | 3.01   | 7.62   | 20.85   |
| 0.35 | 1275.43    | 4494.20    | 12552.74    | 40432.94    | 0.76 | 0.85  | 2.38   | 5.97   | 16.63   |
| 0.36 | 1076.13    | 3724.78    | 10404.97    | 33125.37    | 0.77 | 0.70  | 1.94   | 4.86   | 13.06   |
| 0.37 | 873.57     | 3054.56    | 8599.44     | 27799.74    | 0.78 | 0.57  | 1.56   | 3.80   | 10.02   |
| 0.38 | 729.22     | 2568.21    | 7197.72     | 22756.36    | 0.79 | 0.47  | 1.24   | 2.98   | 7.86    |
| 0.39 | 595.11     | 2092.68    | 5854.55     | 18664.54    | 0.80 | 0.38  | 0.98   | 2.37   | 6.32    |
| 0.40 | 497.55     | 1745.79    | 4811.49     | 15312.06    | 0.81 | 0.31  | 0.77   | 1.81   | 4.81    |
| 0.41 | 415.96     | 1447.92    | 4123.59     | 12858.35    | 0.82 | 0.25  | 0.60   | 1.39   | 3.66    |
| 0.42 | 347.19     | 1213.85    | 3466.82     | 10806.53    | 0.83 | 0.20  | 0.46   | 1.03   | 2.72    |
| 0.43 | 291.56     | 1009.45    | 2894.36     | 8818.30     | 0.84 | 0.16  | 0.36   | 0.80   | 2.03    |
| 0.44 | 246.64     | 849.36     | 2395.45     | 7367.18     | 0.85 | 0.12  | 0.27   | 0.60   | 1.49    |
| 0.45 | 209.88     | 717.95     | 1989.15     | 6230.00     | 0.86 | 0.10  | 0.21   | 0.43   | 1.10    |
| 0.46 | 175.82     | 604.61     | 1708.76     | 5253.25     | 0.87 | 0.08  | 0.15   | 0.32   | 0.76    |
| 0.47 | 148.53     | 506.50     | 1439.09     | 4440.83     | 0.88 | 0.06  | 0.11   | 0.22   | 0.53    |
| 0.48 | 125.64     | 427.35     | 1175.10     | 3719.87     | 0.89 | 0.04  | 0.08   | 0.16   | 0.37    |
| 0.49 | 105.41     | 361.88     | 984.05      | 2985.77     | 0.90 | 0.03  | 0.06   | 0.11   | 0.25    |
| 0.50 | 87.17      | 305.81     | 842.72      | 2603.86     |      |       |        |        |         |

Table S192: Critical values for detector  $\hat{H}_{mov}^{m,0.1}$  with windows size  $n = 0.1$ , and FM-OLS and D-OLS estimation in a model with intercept and linear trend. The number of integrated regressors is 1 and the highest power of  $x_{kt}$  is 3.

| m    | 90 %       | 95 %        | 97,5 %      | 99 %         | m    | 90 %   | 95 %    | 97,5 %  | 99 %     |
|------|------------|-------------|-------------|--------------|------|--------|---------|---------|----------|
| 0.10 | 5144458.60 | 19258674.26 | 59360775.39 | 201191672.52 | 0.51 | 279.09 | 1077.92 | 3303.90 | 11381.18 |
| 0.11 | 3288973.86 | 12225040.97 | 38157438.57 | 130647005.17 | 0.52 | 235.72 | 905.16  | 2672.25 | 9712.01  |
| 0.12 | 2154839.21 | 7874500.14  | 24429496.90 | 87836340.08  | 0.53 | 199.68 | 757.53  | 2301.64 | 8158.22  |
| 0.13 | 1434629.09 | 5378004.93  | 16381343.83 | 58025766.92  | 0.54 | 167.16 | 633.14  | 1959.30 | 6964.54  |
| 0.14 | 981961.63  | 3752939.12  | 11287360.34 | 39280421.92  | 0.55 | 142.09 | 539.27  | 1676.68 | 5916.27  |
| 0.15 | 699844.83  | 2617249.53  | 8026237.62  | 28197587.58  | 0.56 | 120.60 | 458.71  | 1434.19 | 4970.46  |
| 0.16 | 491064.96  | 1816856.84  | 5621077.90  | 20045189.90  | 0.57 | 100.91 | 382.57  | 1190.62 | 4244.31  |
| 0.17 | 355058.59  | 1341630.68  | 4150844.71  | 14582740.72  | 0.58 | 85.70  | 320.65  | 972.33  | 3481.24  |
| 0.18 | 261797.26  | 1000506.67  | 3082870.35  | 11350431.55  | 0.59 | 70.35  | 264.24  | 802.10  | 2902.08  |
| 0.19 | 199363.00  | 750392.95   | 2302884.59  | 8587515.20   | 0.60 | 58.84  | 219.55  | 662.74  | 2430.89  |
| 0.20 | 147482.79  | 550972.12   | 1783097.31  | 6236080.96   | 0.61 | 49.13  | 184.84  | 551.18  | 2026.81  |
| 0.21 | 111073.01  | 418690.40   | 1349447.76  | 4949070.86   | 0.62 | 41.89  | 155.47  | 459.88  | 1636.31  |
| 0.22 | 85804.78   | 331192.07   | 1037493.98  | 3837590.35   | 0.63 | 34.79  | 129.09  | 385.19  | 1303.70  |
| 0.23 | 68652.57   | 258418.68   | 801829.03   | 2893210.04   | 0.64 | 29.24  | 108.24  | 322.44  | 1078.88  |
| 0.24 | 53664.21   | 200616.82   | 610438.22   | 2233208.68   | 0.65 | 24.47  | 90.00   | 270.55  | 873.74   |
| 0.25 | 42325.73   | 158324.12   | 484719.92   | 1685252.93   | 0.66 | 20.40  | 74.11   | 218.22  | 732.65   |
| 0.26 | 33461.88   | 129071.84   | 381442.27   | 1337033.65   | 0.67 | 17.10  | 60.21   | 177.38  | 584.32   |
| 0.27 | 26469.15   | 102116.00   | 300257.45   | 1046275.01   | 0.68 | 14.12  | 50.28   | 145.45  | 483.92   |
| 0.28 | 21540.08   | 79829.61    | 236988.16   | 809176.47    | 0.69 | 11.69  | 41.32   | 117.56  | 390.70   |
| 0.29 | 17096.82   | 65849.82    | 192064.38   | 649107.05    | 0.70 | 9.82   | 33.95   | 96.40   | 334.82   |
| 0.30 | 13760.45   | 52829.66    | 157940.85   | 543278.32    | 0.71 | 7.93   | 28.12   | 79.76   | 268.90   |
| 0.31 | 11124.81   | 43886.70    | 130921.01   | 435493.29    | 0.72 | 6.53   | 23.06   | 66.28   | 222.58   |
| 0.32 | 9150.59    | 36386.23    | 109913.65   | 358372.26    | 0.73 | 5.37   | 19.14   | 54.73   | 178.60   |
| 0.33 | 7596.93    | 29848.72    | 89042.56    | 310715.93    | 0.74 | 4.41   | 15.20   | 42.85   | 138.55   |
| 0.34 | 6139.96    | 24420.75    | 75295.56    | 255213.89    | 0.75 | 3.59   | 12.42   | 35.18   | 109.46   |
| 0.35 | 5110.58    | 19978.11    | 62324.31    | 218428.70    | 0.76 | 2.96   | 9.97    | 28.35   | 88.16    |
| 0.36 | 4234.70    | 16158.08    | 50981.06    | 181645.72    | 0.77 | 2.42   | 8.00    | 22.60   | 70.83    |
| 0.37 | 3444.01    | 13451.20    | 42129.05    | 148218.25    | 0.78 | 1.93   | 6.45    | 17.63   | 56.23    |
| 0.38 | 2877.89    | 11116.62    | 35408.58    | 122971.46    | 0.79 | 1.57   | 5.07    | 13.95   | 44.08    |
| 0.39 | 2404.87    | 9280.94     | 28864.81    | 105459.10    | 0.80 | 1.26   | 3.99    | 10.86   | 33.24    |
| 0.40 | 2011.86    | 7554.13     | 23993.49    | 91333.19     | 0.81 | 1.00   | 3.10    | 8.58    | 25.72    |
| 0.41 | 1661.14    | 6377.19     | 20128.00    | 76443.81     | 0.82 | 0.80   | 2.43    | 6.67    | 20.76    |
| 0.42 | 1397.56    | 5300.55     | 16918.24    | 61465.14     | 0.83 | 0.62   | 1.91    | 5.04    | 15.60    |
| 0.43 | 1159.93    | 4402.69     | 14091.71    | 49608.99     | 0.84 | 0.48   | 1.45    | 3.78    | 11.60    |
| 0.44 | 969.84     | 3686.42     | 11596.84    | 40398.91     | 0.85 | 0.38   | 1.08    | 2.83    | 8.27     |
| 0.45 | 814.47     | 3136.04     | 9676.86     | 33872.90     | 0.86 | 0.30   | 0.82    | 2.10    | 5.97     |
| 0.46 | 679.11     | 2615.79     | 8073.80     | 28219.72     | 0.87 | 0.23   | 0.60    | 1.54    | 4.19     |
| 0.47 | 569.77     | 2205.79     | 6769.32     | 23470.67     | 0.88 | 0.18   | 0.44    | 1.08    | 2.92     |
| 0.48 | 481.99     | 1823.17     | 5656.38     | 19829.25     | 0.89 | 0.14   | 0.32    | 0.74    | 2.07     |
| 0.49 | 397.11     | 1534.54     | 4680.00     | 16886.55     | 0.90 | 0.10   | 0.23    | 0.50    | 1.37     |
| 0.50 | 331.08     | 1286.55     | 3932.31     | 14237.54     |      |        |         |         |          |

Table S193: Critical values for detector  $\hat{H}_{mov}^{m,0.1}$  with windows size  $n = 0.1$ , and IM-OLS estimation in a model with intercept and linear trend. The number of integrated regressors is 1 and the highest power of  $x_{kt}$  is 3.

| m    | 90 %       | 95 %       | 97,5 %      | 99 %        | m    | 90 %  | 95 %   | 97,5 % | 99 %    |
|------|------------|------------|-------------|-------------|------|-------|--------|--------|---------|
| 0.10 | 1652793.04 | 5787599.92 | 15879492.35 | 49340516.47 | 0.51 | 96.58 | 336.90 | 927.95 | 2827.52 |
| 0.11 | 1063956.82 | 3730877.03 | 10365725.23 | 31588781.18 | 0.52 | 81.44 | 288.05 | 778.37 | 2427.41 |
| 0.12 | 694827.59  | 2407458.23 | 6996850.36  | 21393833.18 | 0.53 | 69.23 | 243.67 | 668.39 | 2031.49 |
| 0.13 | 467449.57  | 1667563.49 | 4768996.57  | 15312336.70 | 0.54 | 58.75 | 209.00 | 569.02 | 1704.37 |
| 0.14 | 317478.14  | 1118236.02 | 3286207.57  | 10593559.73 | 0.55 | 48.56 | 172.96 | 469.29 | 1428.20 |
| 0.15 | 225780.19  | 780833.70  | 2279253.77  | 7604607.10  | 0.56 | 41.21 | 142.64 | 401.87 | 1226.20 |
| 0.16 | 160665.81  | 550785.58  | 1571146.73  | 5232756.03  | 0.57 | 34.16 | 119.36 | 331.74 | 975.70  |
| 0.17 | 119376.92  | 409521.20  | 1140569.11  | 3820189.38  | 0.58 | 28.56 | 97.97  | 278.80 | 823.15  |
| 0.18 | 88351.28   | 302783.00  | 855871.74   | 2890235.07  | 0.59 | 23.94 | 80.90  | 228.60 | 694.93  |
| 0.19 | 66417.50   | 226144.93  | 647476.70   | 2152663.69  | 0.60 | 19.55 | 66.80  | 190.28 | 585.66  |
| 0.20 | 50603.34   | 170909.88  | 494440.75   | 1596320.73  | 0.61 | 16.57 | 56.14  | 154.10 | 479.19  |
| 0.21 | 38445.65   | 133083.02  | 380681.81   | 1234513.28  | 0.62 | 13.62 | 46.21  | 127.58 | 392.80  |
| 0.22 | 29550.33   | 102599.09  | 299445.70   | 969243.96   | 0.63 | 11.53 | 38.35  | 105.24 | 325.71  |
| 0.23 | 23038.52   | 81058.30   | 222395.51   | 729485.16   | 0.64 | 9.69  | 32.27  | 86.95  | 268.09  |
| 0.24 | 18040.92   | 62688.98   | 179323.20   | 562308.59   | 0.65 | 8.05  | 26.18  | 70.45  | 210.88  |
| 0.25 | 14037.31   | 49208.22   | 139714.35   | 454241.01   | 0.66 | 6.81  | 21.99  | 57.00  | 163.64  |
| 0.26 | 11133.76   | 39463.56   | 111565.76   | 351524.42   | 0.67 | 5.55  | 17.58  | 46.52  | 138.87  |
| 0.27 | 8945.84    | 31129.37   | 88839.04    | 278659.07   | 0.68 | 4.66  | 14.37  | 37.27  | 109.94  |
| 0.28 | 7181.98    | 25072.24   | 69653.55    | 214201.22   | 0.69 | 3.80  | 11.84  | 30.82  | 91.71   |
| 0.29 | 5816.01    | 19831.97   | 56320.37    | 176046.73   | 0.70 | 3.14  | 9.73   | 24.69  | 72.99   |
| 0.30 | 4650.73    | 16201.96   | 46204.83    | 145883.22   | 0.71 | 2.61  | 7.95   | 20.13  | 57.62   |
| 0.31 | 3794.91    | 13193.82   | 37248.54    | 116270.66   | 0.72 | 2.12  | 6.41   | 16.12  | 47.78   |
| 0.32 | 3076.48    | 11010.32   | 31123.11    | 99658.85    | 0.73 | 1.77  | 5.17   | 12.82  | 37.47   |
| 0.33 | 2541.59    | 9126.28    | 25638.43    | 80723.67    | 0.74 | 1.45  | 4.18   | 10.33  | 29.37   |
| 0.34 | 2077.18    | 7466.35    | 21034.45    | 65789.67    | 0.75 | 1.18  | 3.37   | 8.51   | 22.85   |
| 0.35 | 1724.47    | 6138.38    | 17235.07    | 55731.34    | 0.76 | 0.97  | 2.64   | 6.52   | 18.03   |
| 0.36 | 1444.36    | 5075.76    | 14289.92    | 45876.98    | 0.77 | 0.79  | 2.14   | 5.28   | 14.04   |
| 0.37 | 1169.37    | 4123.98    | 11618.08    | 37838.07    | 0.78 | 0.64  | 1.71   | 4.10   | 10.59   |
| 0.38 | 971.53     | 3475.80    | 9799.75     | 31369.98    | 0.79 | 0.52  | 1.34   | 3.17   | 8.40    |
| 0.39 | 798.11     | 2801.90    | 8001.53     | 25406.61    | 0.80 | 0.42  | 1.05   | 2.49   | 6.57    |
| 0.40 | 668.45     | 2347.71    | 6549.19     | 21177.27    | 0.81 | 0.33  | 0.82   | 1.89   | 4.95    |
| 0.41 | 556.67     | 1969.24    | 5517.07     | 17515.71    | 0.82 | 0.26  | 0.63   | 1.44   | 3.76    |
| 0.42 | 462.68     | 1622.40    | 4635.78     | 14549.94    | 0.83 | 0.21  | 0.48   | 1.06   | 2.77    |
| 0.43 | 387.46     | 1359.25    | 3848.64     | 11854.31    | 0.84 | 0.16  | 0.37   | 0.81   | 2.07    |
| 0.44 | 326.52     | 1141.00    | 3223.36     | 9946.45     | 0.85 | 0.13  | 0.28   | 0.61   | 1.51    |
| 0.45 | 278.10     | 955.44     | 2645.41     | 8245.67     | 0.86 | 0.10  | 0.21   | 0.44   | 1.10    |
| 0.46 | 232.41     | 807.36     | 2277.25     | 6923.82     | 0.87 | 0.08  | 0.15   | 0.32   | 0.77    |
| 0.47 | 196.18     | 668.46     | 1911.27     | 5899.67     | 0.88 | 0.07  | 0.12   | 0.23   | 0.53    |
| 0.48 | 165.52     | 563.27     | 1541.07     | 4921.77     | 0.89 | 0.05  | 0.09   | 0.16   | 0.37    |
| 0.49 | 138.37     | 476.96     | 1300.60     | 3923.15     | 0.90 | 0.05  | 0.07   | 0.11   | 0.25    |
| 0.50 | 115.05     | 401.24     | 1105.41     | 3383.51     |      |       |        |        |         |

Table S194: Critical values for detector  $\hat{H}_{mov}^{m,0.2}$  with windows size  $n = 0.2$ , and FM-OLS and D-OLS estimation in a model with intercept and linear trend. The number of integrated regressors is 1 and the highest power of  $x_{kt}$  is 3.

| m    | 90 %       | 95 %        | 97,5 %      | 99 %         | m    | 90 %   | 95 %    | 97,5 %  | 99 %     |
|------|------------|-------------|-------------|--------------|------|--------|---------|---------|----------|
| 0.10 | 6740248.69 | 25495735.39 | 80915692.63 | 278241700.76 | 0.51 | 363.87 | 1401.66 | 4315.45 | 15103.60 |
| 0.11 | 4291084.31 | 16283125.06 | 52190825.62 | 180790960.37 | 0.52 | 306.13 | 1173.04 | 3438.82 | 12643.68 |
| 0.12 | 2849313.51 | 10577312.79 | 33456278.80 | 122754370.19 | 0.53 | 258.16 | 984.94  | 2964.87 | 10495.63 |
| 0.13 | 1896880.89 | 7219751.01  | 22047728.34 | 79723863.08  | 0.54 | 216.34 | 817.53  | 2485.91 | 8983.29  |
| 0.14 | 1306106.60 | 5058383.11  | 15482307.63 | 54944408.23  | 0.55 | 180.57 | 689.08  | 2158.26 | 7651.77  |
| 0.15 | 928780.82  | 3546021.65  | 10991993.29 | 39052783.57  | 0.56 | 152.87 | 578.93  | 1833.66 | 6276.10  |
| 0.16 | 651544.82  | 2477550.58  | 7688098.19  | 27309642.85  | 0.57 | 129.04 | 483.39  | 1506.17 | 5272.03  |
| 0.17 | 473497.65  | 1825887.68  | 5703058.27  | 20432527.17  | 0.58 | 108.40 | 410.05  | 1227.74 | 4389.70  |
| 0.18 | 349525.75  | 1359516.78  | 4210551.24  | 15806659.54  | 0.59 | 89.79  | 333.88  | 1002.27 | 3636.19  |
| 0.19 | 267455.45  | 1014521.03  | 3165735.78  | 11923818.13  | 0.60 | 74.26  | 273.94  | 824.11  | 3034.34  |
| 0.20 | 197917.06  | 755722.16   | 2451451.27  | 8718384.20   | 0.61 | 61.54  | 231.10  | 690.74  | 2465.76  |
| 0.21 | 149892.66  | 573990.64   | 1865650.60  | 6860405.68   | 0.62 | 51.96  | 192.79  | 564.16  | 1976.04  |
| 0.22 | 116392.51  | 452867.46   | 1424482.97  | 5307565.20   | 0.63 | 43.48  | 158.25  | 469.47  | 1627.88  |
| 0.23 | 92532.82   | 352533.88   | 1110899.73  | 4072520.17   | 0.64 | 35.99  | 131.73  | 390.92  | 1330.32  |
| 0.24 | 72216.93   | 272165.10   | 832047.43   | 3089364.35   | 0.65 | 30.02  | 108.89  | 325.93  | 1043.45  |
| 0.25 | 56896.37   | 218387.14   | 667615.75   | 2387178.77   | 0.66 | 24.74  | 89.40   | 262.90  | 863.86   |
| 0.26 | 45115.71   | 177649.32   | 524275.06   | 1871149.25   | 0.67 | 20.61  | 72.36   | 211.96  | 684.19   |
| 0.27 | 35773.17   | 139604.07   | 415575.70   | 1472804.47   | 0.68 | 17.16  | 60.01   | 170.99  | 562.90   |
| 0.28 | 28915.60   | 107844.45   | 328213.55   | 1117849.40   | 0.69 | 14.17  | 49.09   | 136.91  | 449.85   |
| 0.29 | 22988.39   | 89308.62    | 265378.51   | 909046.13    | 0.70 | 11.65  | 39.97   | 111.92  | 382.39   |
| 0.30 | 18510.28   | 71929.09    | 217306.83   | 754630.24    | 0.71 | 9.36   | 32.77   | 91.98   | 310.45   |
| 0.31 | 14922.63   | 60047.74    | 180633.74   | 605667.73    | 0.72 | 7.69   | 26.53   | 75.47   | 248.39   |
| 0.32 | 12290.51   | 49358.27    | 149143.82   | 495832.31    | 0.73 | 6.24   | 21.73   | 61.64   | 201.89   |
| 0.33 | 10163.42   | 40377.52    | 123341.99   | 428887.75    | 0.74 | 5.08   | 17.28   | 48.16   | 152.55   |
| 0.34 | 8294.39    | 33258.37    | 101636.26   | 349483.16    | 0.75 | 4.13   | 13.98   | 38.85   | 120.58   |
| 0.35 | 6825.86    | 27272.78    | 85510.87    | 302640.35    | 0.76 | 3.37   | 11.07   | 31.09   | 95.61    |
| 0.36 | 5649.41    | 22033.09    | 69580.39    | 247132.91    | 0.77 | 2.73   | 8.83    | 24.61   | 76.36    |
| 0.37 | 4595.45    | 18046.76    | 57349.21    | 203175.96    | 0.78 | 2.16   | 7.09    | 19.32   | 59.83    |
| 0.38 | 3851.76    | 14999.79    | 47888.48    | 167259.82    | 0.79 | 1.74   | 5.49    | 14.89   | 46.08    |
| 0.39 | 3200.90    | 12513.49    | 39202.10    | 144688.16    | 0.80 | 1.37   | 4.29    | 11.58   | 34.56    |
| 0.40 | 2674.74    | 10141.06    | 32145.97    | 124031.09    | 0.81 | 1.09   | 3.31    | 9.01    | 26.76    |
| 0.41 | 2223.27    | 8492.99     | 26998.18    | 102544.48    | 0.82 | 0.86   | 2.56    | 6.95    | 21.37    |
| 0.42 | 1843.75    | 7094.08     | 22495.02    | 82853.19     | 0.83 | 0.67   | 2.00    | 5.21    | 16.03    |
| 0.43 | 1558.12    | 5806.85     | 18712.99    | 66513.78     | 0.84 | 0.51   | 1.51    | 3.89    | 11.81    |
| 0.44 | 1289.50    | 4888.53     | 15456.50    | 54210.06     | 0.85 | 0.40   | 1.12    | 2.88    | 8.40     |
| 0.45 | 1077.52    | 4147.90     | 12954.88    | 45459.50     | 0.86 | 0.31   | 0.85    | 2.14    | 6.04     |
| 0.46 | 890.69     | 3451.26     | 10607.85    | 37736.17     | 0.87 | 0.24   | 0.61    | 1.55    | 4.21     |
| 0.47 | 746.20     | 2890.57     | 8902.35     | 31290.82     | 0.88 | 0.18   | 0.44    | 1.09    | 2.94     |
| 0.48 | 630.85     | 2395.50     | 7467.30     | 26552.20     | 0.89 | 0.14   | 0.32    | 0.75    | 2.07     |
| 0.49 | 520.06     | 2008.24     | 6164.38     | 22188.00     | 0.90 | 0.11   | 0.23    | 0.51    | 1.38     |
| 0.50 | 430.51     | 1671.47     | 5160.86     | 18522.72     |      |        |         |         |          |

Table S195: Critical values for detector  $\hat{H}_{mov}^{m,0.2}$  with windows size  $n = 0.2$ , and IM-OLS estimation in a model with intercept and linear trend. The number of integrated regressors is 1 and the highest power of  $x_{kt}$  is 3.

| m    | 90 %       | 95 %       | 97,5 %      | 99 %        | m    | 90 %   | 95 %   | 97,5 % | 99 %    |
|------|------------|------------|-------------|-------------|------|--------|--------|--------|---------|
| 0.10 | 1773044.15 | 6267519.37 | 17281316.99 | 54219555.29 | 0.51 | 101.78 | 353.87 | 976.83 | 2942.20 |
| 0.11 | 1147070.94 | 4038801.58 | 11332610.79 | 35233084.95 | 0.52 | 85.78  | 302.64 | 811.60 | 2539.11 |
| 0.12 | 748280.30  | 2612192.30 | 7631964.63  | 23714091.30 | 0.53 | 73.07  | 256.13 | 696.53 | 2108.42 |
| 0.13 | 503292.83  | 1806484.23 | 5224745.51  | 16605836.31 | 0.54 | 61.94  | 217.92 | 593.98 | 1771.26 |
| 0.14 | 342645.60  | 1216923.25 | 3598649.63  | 11685736.34 | 0.55 | 50.98  | 181.10 | 487.22 | 1483.34 |
| 0.15 | 243313.12  | 846916.27  | 2481480.26  | 8373633.22  | 0.56 | 43.09  | 148.78 | 416.22 | 1261.30 |
| 0.16 | 174523.22  | 597499.12  | 1727614.86  | 5771511.06  | 0.57 | 35.79  | 123.92 | 346.17 | 1022.62 |
| 0.17 | 128667.44  | 445765.51  | 1239519.83  | 4214772.80  | 0.58 | 29.83  | 102.12 | 288.12 | 850.26  |
| 0.18 | 95368.61   | 330231.40  | 937218.14   | 3173012.10  | 0.59 | 24.94  | 83.78  | 235.58 | 718.92  |
| 0.19 | 71761.29   | 246828.57  | 711904.44   | 2371619.73  | 0.60 | 20.38  | 68.85  | 196.51 | 602.01  |
| 0.20 | 54757.88   | 186991.92  | 541395.01   | 1771466.03  | 0.61 | 17.18  | 57.85  | 158.06 | 493.27  |
| 0.21 | 41429.25   | 144779.30  | 416597.13   | 1352433.20  | 0.62 | 14.06  | 47.42  | 130.35 | 399.66  |
| 0.22 | 31836.06   | 111946.28  | 327392.34   | 1073008.60  | 0.63 | 11.92  | 39.37  | 107.55 | 331.03  |
| 0.23 | 24883.83   | 88642.99   | 243062.96   | 799384.11   | 0.64 | 9.94   | 32.96  | 88.55  | 273.29  |
| 0.24 | 19463.97   | 68486.60   | 195486.57   | 616366.55   | 0.65 | 8.27   | 26.76  | 71.60  | 215.36  |
| 0.25 | 15164.48   | 53598.06   | 152610.73   | 497073.53   | 0.66 | 6.96   | 22.36  | 57.77  | 165.45  |
| 0.26 | 11980.04   | 43075.07   | 122272.21   | 381500.12   | 0.67 | 5.68   | 17.88  | 47.13  | 139.63  |
| 0.27 | 9700.61    | 33873.81   | 96987.40    | 306611.18   | 0.68 | 4.75   | 14.60  | 37.51  | 110.48  |
| 0.28 | 7758.88    | 27211.05   | 75908.43    | 234563.55   | 0.69 | 3.85   | 12.00  | 31.22  | 92.43   |
| 0.29 | 6275.56    | 21514.82   | 61836.18    | 191300.30   | 0.70 | 3.20   | 9.83   | 24.83  | 73.21   |
| 0.30 | 5019.26    | 17538.10   | 50187.22    | 156219.03   | 0.71 | 2.64   | 8.00   | 20.24  | 58.00   |
| 0.31 | 4099.84    | 14357.72   | 40814.93    | 126294.91   | 0.72 | 2.14   | 6.46   | 16.19  | 47.94   |
| 0.32 | 3311.59    | 11905.71   | 33764.11    | 107985.40   | 0.73 | 1.79   | 5.18   | 12.86  | 37.50   |
| 0.33 | 2749.51    | 9967.89    | 27773.33    | 87485.74    | 0.74 | 1.46   | 4.19   | 10.36  | 29.44   |
| 0.34 | 2232.52    | 8095.93    | 22689.61    | 71571.42    | 0.75 | 1.19   | 3.38   | 8.52   | 22.86   |
| 0.35 | 1852.12    | 6606.93    | 18593.15    | 60641.75    | 0.76 | 0.98   | 2.65   | 6.53   | 18.04   |
| 0.36 | 1550.23    | 5464.48    | 15502.59    | 50160.64    | 0.77 | 0.79   | 2.14   | 5.29   | 14.04   |
| 0.37 | 1257.39    | 4432.69    | 12580.75    | 40559.18    | 0.78 | 0.64   | 1.71   | 4.10   | 10.60   |
| 0.38 | 1046.95    | 3732.73    | 10596.61    | 33642.89    | 0.79 | 0.52   | 1.34   | 3.17   | 8.40    |
| 0.39 | 854.80     | 2994.22    | 8652.21     | 27491.91    | 0.80 | 0.42   | 1.05   | 2.49   | 6.58    |
| 0.40 | 717.90     | 2528.99    | 7042.14     | 22526.62    | 0.81 | 0.33   | 0.82   | 1.90   | 4.95    |
| 0.41 | 592.53     | 2110.27    | 5912.51     | 18595.55    | 0.82 | 0.27   | 0.64   | 1.45   | 3.76    |
| 0.42 | 496.98     | 1747.50    | 4952.74     | 15589.96    | 0.83 | 0.21   | 0.49   | 1.07   | 2.78    |
| 0.43 | 415.74     | 1456.41    | 4102.95     | 12687.02    | 0.84 | 0.17   | 0.37   | 0.82   | 2.07    |
| 0.44 | 350.80     | 1222.49    | 3424.00     | 10592.77    | 0.85 | 0.14   | 0.28   | 0.61   | 1.51    |
| 0.45 | 297.20     | 1021.09    | 2811.55     | 8758.48     | 0.86 | 0.11   | 0.22   | 0.44   | 1.11    |
| 0.46 | 247.93     | 860.89     | 2438.11     | 7351.96     | 0.87 | 0.09   | 0.16   | 0.33   | 0.77    |
| 0.47 | 206.68     | 712.19     | 2021.75     | 6267.42     | 0.88 | 0.08   | 0.13   | 0.23   | 0.53    |
| 0.48 | 175.60     | 594.01     | 1634.76     | 5195.22     | 0.89 | 0.07   | 0.10   | 0.17   | 0.38    |
| 0.49 | 147.22     | 506.73     | 1397.78     | 4159.72     | 0.90 | 0.06   | 0.08   | 0.12   | 0.25    |
| 0.50 | 121.81     | 422.49     | 1167.23     | 3599.09     |      |        |        |        |         |

Table S196: Critical values for detector  $\hat{H}_{mov}^{m,0.3}$  with windows size  $n = 0.3$ , and FM-OLS and D-OLS estimation in a model with intercept and linear trend. The number of integrated regressors is 1 and the highest power of  $x_{kt}$  is 3.

| m    | 90 %       | 95 %        | 97,5 %      | 99 %         | m    | 90 %   | 95 %    | 97,5 %  | 99 %     |
|------|------------|-------------|-------------|--------------|------|--------|---------|---------|----------|
| 0.10 | 7207063.72 | 27470374.13 | 87756506.37 | 306702043.70 | 0.51 | 382.64 | 1477.00 | 4510.77 | 15760.18 |
| 0.11 | 4619880.94 | 17652349.72 | 57264967.21 | 199515626.58 | 0.52 | 322.06 | 1234.58 | 3625.87 | 13229.18 |
| 0.12 | 3060558.22 | 11489015.27 | 36345728.21 | 133283779.32 | 0.53 | 271.92 | 1032.35 | 3098.13 | 10900.75 |
| 0.13 | 2044005.61 | 7832515.63  | 24457200.34 | 86841657.96  | 0.54 | 225.88 | 856.20  | 2607.45 | 9291.22  |
| 0.14 | 1410653.00 | 5506643.47  | 16809871.97 | 60501455.57  | 0.55 | 188.87 | 721.45  | 2236.59 | 7888.73  |
| 0.15 | 1000223.45 | 3846636.73  | 11923668.04 | 42688580.56  | 0.56 | 159.42 | 602.38  | 1911.27 | 6441.84  |
| 0.16 | 701093.49  | 2685881.19  | 8455521.26  | 29954330.24  | 0.57 | 134.67 | 502.73  | 1562.68 | 5437.83  |
| 0.17 | 511587.67  | 1995354.80  | 6165854.61  | 22278605.74  | 0.58 | 112.89 | 424.47  | 1270.36 | 4514.73  |
| 0.18 | 377899.64  | 1480942.00  | 4593015.24  | 17242733.13  | 0.59 | 93.46  | 345.96  | 1031.18 | 3748.44  |
| 0.19 | 287151.96  | 1100208.71  | 3435800.87  | 13087528.53  | 0.60 | 77.20  | 283.20  | 852.06  | 3120.67  |
| 0.20 | 213853.12  | 824639.53   | 2672770.76  | 9532107.23   | 0.61 | 63.78  | 237.71  | 709.91  | 2526.57  |
| 0.21 | 162528.07  | 622744.33   | 2046088.45  | 7530533.52   | 0.62 | 53.47  | 198.66  | 577.13  | 2023.37  |
| 0.22 | 125888.18  | 490996.05   | 1548449.31  | 5770046.22   | 0.63 | 44.95  | 161.74  | 482.82  | 1662.57  |
| 0.23 | 100438.00  | 383141.65   | 1206282.71  | 4433092.44   | 0.64 | 37.05  | 135.15  | 398.31  | 1352.79  |
| 0.24 | 77717.24   | 296178.79   | 905869.59   | 3389270.18   | 0.65 | 30.90  | 110.79  | 331.62  | 1065.56  |
| 0.25 | 61431.36   | 238430.47   | 729938.45   | 2622337.42   | 0.66 | 25.25  | 91.07   | 266.60  | 870.31   |
| 0.26 | 48928.98   | 193001.84   | 567803.82   | 2057181.41   | 0.67 | 21.04  | 73.15   | 214.56  | 692.35   |
| 0.27 | 38725.11   | 151000.51   | 452339.64   | 1609380.20   | 0.68 | 17.47  | 60.85   | 172.54  | 565.60   |
| 0.28 | 31145.84   | 117575.10   | 357067.24   | 1226395.53   | 0.69 | 14.42  | 49.69   | 138.05  | 451.89   |
| 0.29 | 24713.76   | 96446.45    | 286794.40   | 987576.83    | 0.70 | 11.78  | 40.32   | 112.69  | 384.05   |
| 0.30 | 19910.26   | 77942.80    | 235424.88   | 826503.41    | 0.71 | 9.48   | 33.11   | 92.46   | 311.53   |
| 0.31 | 16127.51   | 65444.04    | 195377.03   | 656481.07    | 0.72 | 7.77   | 26.77   | 75.99   | 249.51   |
| 0.32 | 13219.06   | 53792.72    | 161600.45   | 542124.07    | 0.73 | 6.29   | 21.83   | 61.77   | 202.48   |
| 0.33 | 11006.24   | 43590.91    | 133262.52   | 462287.08    | 0.74 | 5.12   | 17.33   | 48.23   | 153.18   |
| 0.34 | 8941.10    | 35825.61    | 110608.44   | 379903.48    | 0.75 | 4.15   | 14.03   | 38.95   | 120.59   |
| 0.35 | 7304.89    | 29333.80    | 92322.50    | 324507.66    | 0.76 | 3.39   | 11.09   | 31.11   | 95.62    |
| 0.36 | 6084.87    | 23857.16    | 74747.33    | 269103.15    | 0.77 | 2.74   | 8.84    | 24.62   | 76.37    |
| 0.37 | 4944.36    | 19419.47    | 61591.83    | 217960.67    | 0.78 | 2.16   | 7.10    | 19.33   | 59.83    |
| 0.38 | 4103.39    | 16112.42    | 51237.79    | 179203.83    | 0.79 | 1.74   | 5.50    | 14.90   | 46.08    |
| 0.39 | 3425.72    | 13489.91    | 42434.71    | 154421.19    | 0.80 | 1.37   | 4.30    | 11.58   | 34.56    |
| 0.40 | 2865.02    | 10825.53    | 34419.32    | 134437.28    | 0.81 | 1.09   | 3.31    | 9.01    | 26.76    |
| 0.41 | 2371.62    | 9130.08     | 28736.79    | 110225.57    | 0.82 | 0.86   | 2.56    | 6.95    | 21.37    |
| 0.42 | 1966.09    | 7640.60     | 24021.38    | 89050.07     | 0.83 | 0.67   | 2.00    | 5.21    | 16.03    |
| 0.43 | 1651.36    | 6227.82     | 20031.17    | 70637.36     | 0.84 | 0.51   | 1.51    | 3.89    | 11.81    |
| 0.44 | 1375.19    | 5230.85     | 16417.51    | 58550.23     | 0.85 | 0.40   | 1.12    | 2.88    | 8.40     |
| 0.45 | 1147.89    | 4384.07     | 13838.45    | 48531.34     | 0.86 | 0.31   | 0.85    | 2.14    | 6.04     |
| 0.46 | 946.41     | 3657.27     | 11228.77    | 40190.22     | 0.87 | 0.24   | 0.61    | 1.55    | 4.21     |
| 0.47 | 792.60     | 3047.74     | 9436.40     | 33429.09     | 0.88 | 0.19   | 0.45    | 1.09    | 2.94     |
| 0.48 | 666.11     | 2539.23     | 7905.62     | 27811.97     | 0.89 | 0.14   | 0.32    | 0.75    | 2.08     |
| 0.49 | 548.64     | 2129.01     | 6517.37     | 23419.26     | 0.90 | 0.11   | 0.23    | 0.51    | 1.38     |
| 0.50 | 452.81     | 1766.52     | 5414.36     | 19566.72     |      |        |         |         |          |

Table S197: Critical values for detector  $\hat{H}_{mov}^{m,0.3}$  with windows size  $n = 0.3$ , and IM-OLS estimation in a model with intercept and linear trend. The number of integrated regressors is 1 and the highest power of  $x_{kt}$  is 3.

## 4.2 Number of I(1) regressors: 2

| m    | 90 %   | 95 %   | 97,5 % | 99 %   | m    | 90 % | 95 % | 97,5 % | 99 % |
|------|--------|--------|--------|--------|------|------|------|--------|------|
| 0.10 | 189.12 | 326.72 | 512.33 | 825.14 | 0.51 | 1.44 | 2.37 | 3.59   | 5.69 |
| 0.11 | 150.50 | 258.27 | 397.02 | 651.86 | 0.52 | 1.33 | 2.17 | 3.29   | 5.28 |
| 0.12 | 120.75 | 208.32 | 325.93 | 524.51 | 0.53 | 1.20 | 1.98 | 3.02   | 4.85 |
| 0.13 | 98.19  | 170.42 | 266.36 | 436.78 | 0.54 | 1.10 | 1.81 | 2.75   | 4.42 |
| 0.14 | 82.32  | 141.67 | 221.29 | 367.06 | 0.55 | 1.02 | 1.66 | 2.52   | 3.96 |
| 0.15 | 69.49  | 118.36 | 184.00 | 307.93 | 0.56 | 0.94 | 1.52 | 2.29   | 3.60 |
| 0.16 | 58.83  | 100.64 | 157.41 | 255.48 | 0.57 | 0.86 | 1.38 | 2.08   | 3.28 |
| 0.17 | 50.34  | 86.22  | 133.48 | 214.60 | 0.58 | 0.79 | 1.27 | 1.92   | 2.97 |
| 0.18 | 43.10  | 73.09  | 114.33 | 185.14 | 0.59 | 0.73 | 1.17 | 1.74   | 2.71 |
| 0.19 | 37.23  | 63.68  | 99.23  | 163.59 | 0.60 | 0.66 | 1.07 | 1.57   | 2.45 |
| 0.20 | 32.51  | 55.48  | 86.76  | 142.04 | 0.61 | 0.61 | 0.97 | 1.44   | 2.24 |
| 0.21 | 28.45  | 48.49  | 76.20  | 124.66 | 0.62 | 0.56 | 0.88 | 1.30   | 2.02 |
| 0.22 | 24.93  | 42.72  | 66.34  | 108.93 | 0.63 | 0.51 | 0.81 | 1.20   | 1.83 |
| 0.23 | 21.88  | 37.49  | 58.64  | 95.39  | 0.64 | 0.46 | 0.74 | 1.09   | 1.67 |
| 0.24 | 19.46  | 33.06  | 51.92  | 84.45  | 0.65 | 0.42 | 0.67 | 0.99   | 1.50 |
| 0.25 | 17.37  | 29.56  | 45.24  | 74.78  | 0.66 | 0.39 | 0.61 | 0.89   | 1.35 |
| 0.26 | 15.47  | 26.26  | 40.64  | 66.82  | 0.67 | 0.35 | 0.56 | 0.81   | 1.21 |
| 0.27 | 13.82  | 23.53  | 36.24  | 59.54  | 0.68 | 0.32 | 0.50 | 0.73   | 1.10 |
| 0.28 | 12.30  | 20.90  | 32.90  | 53.81  | 0.69 | 0.29 | 0.45 | 0.65   | 0.98 |
| 0.29 | 11.01  | 18.84  | 29.12  | 47.38  | 0.70 | 0.27 | 0.41 | 0.59   | 0.89 |
| 0.30 | 9.89   | 16.82  | 25.97  | 42.17  | 0.71 | 0.24 | 0.37 | 0.52   | 0.79 |
| 0.31 | 8.88   | 14.97  | 22.95  | 38.31  | 0.72 | 0.22 | 0.34 | 0.47   | 0.71 |
| 0.32 | 8.09   | 13.69  | 20.97  | 34.38  | 0.73 | 0.20 | 0.30 | 0.42   | 0.63 |
| 0.33 | 7.31   | 12.43  | 19.04  | 31.07  | 0.74 | 0.18 | 0.27 | 0.38   | 0.56 |
| 0.34 | 6.65   | 11.27  | 17.14  | 28.20  | 0.75 | 0.16 | 0.24 | 0.34   | 0.50 |
| 0.35 | 6.02   | 10.21  | 15.60  | 25.39  | 0.76 | 0.14 | 0.22 | 0.30   | 0.44 |
| 0.36 | 5.49   | 9.36   | 14.36  | 23.09  | 0.77 | 0.13 | 0.19 | 0.27   | 0.38 |
| 0.37 | 4.98   | 8.43   | 13.02  | 20.81  | 0.78 | 0.12 | 0.17 | 0.24   | 0.34 |
| 0.38 | 4.56   | 7.74   | 11.85  | 19.03  | 0.79 | 0.10 | 0.15 | 0.21   | 0.30 |
| 0.39 | 4.14   | 7.05   | 10.79  | 17.13  | 0.80 | 0.09 | 0.14 | 0.18   | 0.26 |
| 0.40 | 3.78   | 6.39   | 9.82   | 15.74  | 0.81 | 0.08 | 0.12 | 0.16   | 0.22 |
| 0.41 | 3.47   | 5.85   | 9.08   | 14.30  | 0.82 | 0.07 | 0.10 | 0.14   | 0.20 |
| 0.42 | 3.17   | 5.35   | 8.21   | 13.12  | 0.83 | 0.06 | 0.09 | 0.12   | 0.17 |
| 0.43 | 2.92   | 4.88   | 7.47   | 12.03  | 0.84 | 0.05 | 0.08 | 0.10   | 0.14 |
| 0.44 | 2.68   | 4.51   | 6.87   | 11.17  | 0.85 | 0.05 | 0.07 | 0.09   | 0.12 |
| 0.45 | 2.44   | 4.08   | 6.28   | 10.18  | 0.86 | 0.04 | 0.06 | 0.08   | 0.10 |
| 0.46 | 2.22   | 3.70   | 5.74   | 9.17   | 0.87 | 0.03 | 0.05 | 0.06   | 0.09 |
| 0.47 | 2.04   | 3.41   | 5.22   | 8.32   | 0.88 | 0.03 | 0.04 | 0.05   | 0.07 |
| 0.48 | 1.86   | 3.09   | 4.69   | 7.59   | 0.89 | 0.02 | 0.03 | 0.04   | 0.06 |
| 0.49 | 1.70   | 2.84   | 4.34   | 6.88   | 0.90 | 0.02 | 0.03 | 0.03   | 0.05 |
| 0.50 | 1.58   | 2.59   | 3.96   | 6.27   |      |      |      |        |      |

Table S198: Critical values for detector  $\hat{H}_{mov}^{m,0.1}$  with windows size  $n = 0.1$ , and FM-OLS and D-OLS estimation in a model with intercept. The number of integrated regressors is 2 and the highest power of  $x_{kt}$  is 1.

| m    | 90 %   | 95 %   | 97,5 %  | 99 %    | m    | 90 % | 95 % | 97,5 % | 99 %  |
|------|--------|--------|---------|---------|------|------|------|--------|-------|
| 0.10 | 383.12 | 697.57 | 1125.57 | 1940.06 | 0.51 | 2.82 | 4.85 | 7.91   | 13.59 |
| 0.11 | 300.92 | 545.54 | 904.83  | 1531.88 | 0.52 | 2.58 | 4.46 | 7.24   | 12.33 |
| 0.12 | 242.25 | 440.00 | 726.38  | 1242.53 | 0.53 | 2.38 | 4.11 | 6.67   | 11.31 |
| 0.13 | 200.36 | 363.37 | 599.05  | 1043.10 | 0.54 | 2.18 | 3.76 | 6.10   | 10.30 |
| 0.14 | 166.20 | 300.30 | 497.75  | 859.06  | 0.55 | 2.00 | 3.46 | 5.54   | 9.32  |
| 0.15 | 138.60 | 252.52 | 414.61  | 721.47  | 0.56 | 1.84 | 3.15 | 5.04   | 8.45  |
| 0.16 | 117.74 | 214.23 | 348.45  | 616.86  | 0.57 | 1.69 | 2.90 | 4.55   | 7.74  |
| 0.17 | 100.03 | 182.07 | 297.10  | 521.58  | 0.58 | 1.55 | 2.65 | 4.17   | 7.11  |
| 0.18 | 85.96  | 155.38 | 256.13  | 447.13  | 0.59 | 1.42 | 2.43 | 3.82   | 6.51  |
| 0.19 | 74.50  | 135.49 | 222.25  | 384.32  | 0.60 | 1.30 | 2.23 | 3.50   | 5.96  |
| 0.20 | 66.12  | 119.23 | 193.17  | 331.88  | 0.61 | 1.19 | 2.04 | 3.22   | 5.40  |
| 0.21 | 57.54  | 104.32 | 167.64  | 293.28  | 0.62 | 1.09 | 1.86 | 2.93   | 4.84  |
| 0.22 | 50.49  | 91.06  | 148.69  | 259.51  | 0.63 | 1.00 | 1.69 | 2.65   | 4.44  |
| 0.23 | 44.67  | 80.46  | 130.21  | 229.08  | 0.64 | 0.91 | 1.54 | 2.42   | 4.01  |
| 0.24 | 39.27  | 71.30  | 115.72  | 204.20  | 0.65 | 0.84 | 1.39 | 2.21   | 3.60  |
| 0.25 | 34.75  | 62.72  | 102.62  | 184.04  | 0.66 | 0.76 | 1.27 | 2.00   | 3.29  |
| 0.26 | 31.04  | 56.02  | 91.93   | 164.64  | 0.67 | 0.70 | 1.16 | 1.80   | 3.00  |
| 0.27 | 27.68  | 49.84  | 81.98   | 144.46  | 0.68 | 0.64 | 1.05 | 1.63   | 2.70  |
| 0.28 | 24.73  | 44.16  | 73.37   | 128.01  | 0.69 | 0.58 | 0.96 | 1.47   | 2.39  |
| 0.29 | 22.15  | 39.58  | 64.77   | 115.84  | 0.70 | 0.53 | 0.87 | 1.32   | 2.16  |
| 0.30 | 19.90  | 35.57  | 58.32   | 103.99  | 0.71 | 0.48 | 0.79 | 1.19   | 1.92  |
| 0.31 | 17.88  | 32.02  | 52.43   | 91.41   | 0.72 | 0.44 | 0.71 | 1.07   | 1.72  |
| 0.32 | 16.12  | 28.90  | 46.91   | 82.09   | 0.73 | 0.39 | 0.63 | 0.96   | 1.51  |
| 0.33 | 14.65  | 25.97  | 42.42   | 72.96   | 0.74 | 0.36 | 0.57 | 0.86   | 1.36  |
| 0.34 | 13.23  | 23.47  | 38.15   | 64.87   | 0.75 | 0.32 | 0.51 | 0.77   | 1.21  |
| 0.35 | 11.94  | 21.44  | 34.44   | 59.25   | 0.76 | 0.29 | 0.46 | 0.68   | 1.07  |
| 0.36 | 10.76  | 19.32  | 31.31   | 53.62   | 0.77 | 0.26 | 0.41 | 0.61   | 0.94  |
| 0.37 | 9.83   | 17.61  | 28.17   | 49.22   | 0.78 | 0.24 | 0.37 | 0.54   | 0.82  |
| 0.38 | 8.91   | 15.91  | 25.43   | 44.66   | 0.79 | 0.21 | 0.33 | 0.47   | 0.73  |
| 0.39 | 8.12   | 14.46  | 23.34   | 40.85   | 0.80 | 0.19 | 0.29 | 0.42   | 0.64  |
| 0.40 | 7.45   | 13.21  | 21.47   | 36.64   | 0.81 | 0.17 | 0.26 | 0.37   | 0.56  |
| 0.41 | 6.82   | 11.98  | 19.66   | 33.07   | 0.82 | 0.15 | 0.23 | 0.32   | 0.49  |
| 0.42 | 6.23   | 11.05  | 17.94   | 30.37   | 0.83 | 0.13 | 0.20 | 0.28   | 0.42  |
| 0.43 | 5.67   | 10.18  | 16.35   | 27.53   | 0.84 | 0.12 | 0.18 | 0.25   | 0.36  |
| 0.44 | 5.20   | 9.25   | 14.93   | 24.99   | 0.85 | 0.10 | 0.16 | 0.21   | 0.31  |
| 0.45 | 4.75   | 8.45   | 13.52   | 22.95   | 0.86 | 0.09 | 0.13 | 0.18   | 0.27  |
| 0.46 | 4.37   | 7.73   | 12.38   | 20.92   | 0.87 | 0.08 | 0.12 | 0.16   | 0.23  |
| 0.47 | 4.00   | 7.06   | 11.30   | 19.24   | 0.88 | 0.07 | 0.10 | 0.14   | 0.19  |
| 0.48 | 3.65   | 6.48   | 10.37   | 17.75   | 0.89 | 0.06 | 0.08 | 0.11   | 0.16  |
| 0.49 | 3.35   | 5.91   | 9.50    | 16.15   | 0.90 | 0.05 | 0.07 | 0.10   | 0.13  |
| 0.50 | 3.08   | 5.38   | 8.68    | 14.81   |      |      |      |        |       |

Table S199: Critical values for detector  $\hat{H}_{mov}^{m,0.1}$  with windows size  $n = 0.1$ , and IM-OLS estimation in a model with intercept. The number of integrated regressors is 2 and the highest power of  $x_{kt}$  is 1.



| m    | 90 %   | 95 %   | 97,5 % | 99 %    | m    | 90 % | 95 % | 97,5 % | 99 % |
|------|--------|--------|--------|---------|------|------|------|--------|------|
| 0.10 | 300.76 | 526.96 | 832.52 | 1346.11 | 0.51 | 2.17 | 3.58 | 5.37   | 8.59 |
| 0.11 | 240.15 | 415.93 | 646.48 | 1063.22 | 0.52 | 1.99 | 3.27 | 4.96   | 7.87 |
| 0.12 | 192.76 | 336.35 | 530.65 | 863.07  | 0.53 | 1.80 | 2.96 | 4.53   | 7.19 |
| 0.13 | 157.12 | 275.76 | 436.08 | 721.53  | 0.54 | 1.64 | 2.71 | 4.07   | 6.51 |
| 0.14 | 131.48 | 227.64 | 360.57 | 600.63  | 0.55 | 1.51 | 2.46 | 3.73   | 5.78 |
| 0.15 | 111.33 | 191.82 | 300.73 | 503.48  | 0.56 | 1.38 | 2.24 | 3.37   | 5.29 |
| 0.16 | 94.66  | 162.40 | 256.64 | 415.69  | 0.57 | 1.26 | 2.04 | 3.03   | 4.79 |
| 0.17 | 80.88  | 139.35 | 218.47 | 349.58  | 0.58 | 1.15 | 1.86 | 2.78   | 4.29 |
| 0.18 | 69.20  | 119.04 | 186.77 | 302.91  | 0.59 | 1.05 | 1.70 | 2.51   | 3.89 |
| 0.19 | 59.72  | 103.18 | 161.08 | 266.04  | 0.60 | 0.96 | 1.54 | 2.28   | 3.49 |
| 0.20 | 52.04  | 90.00  | 141.09 | 231.29  | 0.61 | 0.88 | 1.40 | 2.06   | 3.16 |
| 0.21 | 45.74  | 78.38  | 123.39 | 202.59  | 0.62 | 0.79 | 1.25 | 1.85   | 2.85 |
| 0.22 | 39.95  | 69.26  | 108.21 | 177.05  | 0.63 | 0.72 | 1.15 | 1.67   | 2.55 |
| 0.23 | 35.13  | 60.34  | 94.83  | 155.13  | 0.64 | 0.65 | 1.04 | 1.52   | 2.30 |
| 0.24 | 31.14  | 53.31  | 84.09  | 137.62  | 0.65 | 0.59 | 0.94 | 1.36   | 2.07 |
| 0.25 | 27.89  | 47.54  | 73.05  | 121.83  | 0.66 | 0.54 | 0.85 | 1.22   | 1.82 |
| 0.26 | 24.75  | 42.21  | 65.35  | 108.57  | 0.67 | 0.49 | 0.76 | 1.10   | 1.62 |
| 0.27 | 22.06  | 37.65  | 58.31  | 95.71   | 0.68 | 0.44 | 0.68 | 0.99   | 1.48 |
| 0.28 | 19.62  | 33.48  | 52.66  | 86.42   | 0.69 | 0.40 | 0.61 | 0.87   | 1.31 |
| 0.29 | 17.56  | 30.08  | 46.69  | 76.04   | 0.70 | 0.36 | 0.54 | 0.78   | 1.16 |
| 0.30 | 15.75  | 26.88  | 41.62  | 67.63   | 0.71 | 0.32 | 0.49 | 0.69   | 1.03 |
| 0.31 | 14.13  | 23.95  | 36.93  | 61.32   | 0.72 | 0.29 | 0.44 | 0.62   | 0.92 |
| 0.32 | 12.81  | 21.74  | 33.44  | 55.14   | 0.73 | 0.26 | 0.39 | 0.55   | 0.80 |
| 0.33 | 11.56  | 19.71  | 30.39  | 49.56   | 0.74 | 0.23 | 0.35 | 0.48   | 0.70 |
| 0.34 | 10.51  | 17.85  | 27.19  | 44.68   | 0.75 | 0.21 | 0.31 | 0.42   | 0.62 |
| 0.35 | 9.52   | 16.17  | 24.70  | 40.20   | 0.76 | 0.18 | 0.27 | 0.37   | 0.53 |
| 0.36 | 8.63   | 14.80  | 22.59  | 36.57   | 0.77 | 0.16 | 0.24 | 0.33   | 0.46 |
| 0.37 | 7.80   | 13.32  | 20.41  | 32.71   | 0.78 | 0.15 | 0.21 | 0.29   | 0.41 |
| 0.38 | 7.14   | 12.12  | 18.68  | 29.83   | 0.79 | 0.13 | 0.18 | 0.25   | 0.35 |
| 0.39 | 6.47   | 11.03  | 16.93  | 26.92   | 0.80 | 0.11 | 0.16 | 0.21   | 0.29 |
| 0.40 | 5.89   | 9.97   | 15.37  | 24.70   | 0.81 | 0.10 | 0.14 | 0.19   | 0.25 |
| 0.41 | 5.40   | 9.11   | 14.11  | 22.29   | 0.82 | 0.09 | 0.12 | 0.16   | 0.22 |
| 0.42 | 4.90   | 8.33   | 12.88  | 20.22   | 0.83 | 0.08 | 0.11 | 0.14   | 0.19 |
| 0.43 | 4.51   | 7.60   | 11.57  | 18.68   | 0.84 | 0.07 | 0.09 | 0.12   | 0.16 |
| 0.44 | 4.12   | 6.98   | 10.63  | 17.18   | 0.85 | 0.06 | 0.08 | 0.11   | 0.14 |
| 0.45 | 3.74   | 6.30   | 9.69   | 15.62   | 0.86 | 0.06 | 0.07 | 0.09   | 0.12 |
| 0.46 | 3.41   | 5.70   | 8.79   | 13.99   | 0.87 | 0.05 | 0.07 | 0.08   | 0.11 |
| 0.47 | 3.12   | 5.21   | 7.99   | 12.69   | 0.88 | 0.05 | 0.06 | 0.08   | 0.10 |
| 0.48 | 2.84   | 4.70   | 7.13   | 11.56   | 0.89 | 0.04 | 0.05 | 0.07   | 0.09 |
| 0.49 | 2.58   | 4.31   | 6.57   | 10.38   | 0.90 | 0.04 | 0.05 | 0.07   | 0.09 |
| 0.50 | 2.37   | 3.92   | 5.98   | 9.43    |      |      |      |        |      |

Table S200: Critical values for detector  $\hat{H}_{mov}^{m,0.2}$  with windows size  $n = 0.2$ , and FM-OLS and D-OLS estimation in a model with intercept. The number of integrated regressors is 2 and the highest power of  $x_{kt}$  is 1.

| m    | 90 %   | 95 %    | 97,5 %  | 99 %    | m    | 90 % | 95 % | 97,5 % | 99 %  |
|------|--------|---------|---------|---------|------|------|------|--------|-------|
| 0.10 | 610.84 | 1123.49 | 1821.75 | 3149.20 | 0.51 | 4.25 | 7.37 | 11.93  | 20.51 |
| 0.11 | 478.85 | 874.77  | 1462.26 | 2483.97 | 0.52 | 3.89 | 6.70 | 10.83  | 18.63 |
| 0.12 | 387.17 | 708.02  | 1178.05 | 2034.44 | 0.53 | 3.56 | 6.14 | 9.98   | 16.81 |
| 0.13 | 320.46 | 586.16  | 970.94  | 1696.03 | 0.54 | 3.26 | 5.63 | 9.08   | 15.37 |
| 0.14 | 265.79 | 484.59  | 810.73  | 1394.85 | 0.55 | 2.97 | 5.13 | 8.22   | 13.75 |
| 0.15 | 222.09 | 406.69  | 674.29  | 1167.77 | 0.56 | 2.71 | 4.66 | 7.40   | 12.34 |
| 0.16 | 188.13 | 344.54  | 564.84  | 1009.20 | 0.57 | 2.48 | 4.25 | 6.69   | 11.24 |
| 0.17 | 160.35 | 293.02  | 483.54  | 848.62  | 0.58 | 2.27 | 3.87 | 6.07   | 10.33 |
| 0.18 | 137.56 | 249.84  | 413.94  | 727.57  | 0.59 | 2.06 | 3.54 | 5.55   | 9.31  |
| 0.19 | 119.23 | 219.11  | 359.77  | 624.09  | 0.60 | 1.89 | 3.23 | 5.05   | 8.53  |
| 0.20 | 105.55 | 192.42  | 313.10  | 542.67  | 0.61 | 1.73 | 2.93 | 4.57   | 7.73  |
| 0.21 | 92.36  | 168.02  | 270.68  | 474.94  | 0.62 | 1.57 | 2.66 | 4.17   | 6.88  |
| 0.22 | 80.75  | 146.46  | 239.43  | 422.34  | 0.63 | 1.43 | 2.41 | 3.76   | 6.26  |
| 0.23 | 71.10  | 129.83  | 211.31  | 370.18  | 0.64 | 1.30 | 2.19 | 3.40   | 5.59  |
| 0.24 | 62.74  | 114.22  | 187.53  | 330.59  | 0.65 | 1.18 | 1.96 | 3.08   | 4.99  |
| 0.25 | 55.74  | 100.51  | 165.88  | 295.81  | 0.66 | 1.07 | 1.77 | 2.77   | 4.52  |
| 0.26 | 49.34  | 89.83   | 148.59  | 266.66  | 0.67 | 0.97 | 1.60 | 2.47   | 4.08  |
| 0.27 | 44.03  | 80.15   | 131.44  | 233.70  | 0.68 | 0.88 | 1.45 | 2.24   | 3.66  |
| 0.28 | 39.25  | 70.65   | 117.69  | 207.47  | 0.69 | 0.80 | 1.30 | 1.99   | 3.22  |
| 0.29 | 35.19  | 63.29   | 103.37  | 185.99  | 0.70 | 0.72 | 1.17 | 1.78   | 2.86  |
| 0.30 | 31.57  | 56.78   | 93.29   | 166.72  | 0.71 | 0.65 | 1.05 | 1.58   | 2.53  |
| 0.31 | 28.36  | 51.05   | 84.17   | 146.28  | 0.72 | 0.59 | 0.94 | 1.41   | 2.24  |
| 0.32 | 25.52  | 45.64   | 75.33   | 131.46  | 0.73 | 0.52 | 0.84 | 1.25   | 1.96  |
| 0.33 | 23.09  | 41.22   | 67.88   | 117.11  | 0.74 | 0.47 | 0.75 | 1.11   | 1.72  |
| 0.34 | 20.84  | 37.19   | 60.77   | 103.51  | 0.75 | 0.42 | 0.66 | 0.98   | 1.52  |
| 0.35 | 18.87  | 33.79   | 54.49   | 93.59   | 0.76 | 0.38 | 0.59 | 0.86   | 1.33  |
| 0.36 | 16.89  | 30.38   | 49.63   | 84.94   | 0.77 | 0.34 | 0.52 | 0.76   | 1.17  |
| 0.37 | 15.39  | 27.68   | 44.54   | 78.18   | 0.78 | 0.30 | 0.46 | 0.66   | 1.01  |
| 0.38 | 13.97  | 24.90   | 40.06   | 70.51   | 0.79 | 0.26 | 0.41 | 0.57   | 0.88  |
| 0.39 | 12.70  | 22.62   | 36.66   | 64.20   | 0.80 | 0.23 | 0.35 | 0.50   | 0.75  |
| 0.40 | 11.58  | 20.56   | 33.51   | 57.72   | 0.81 | 0.20 | 0.31 | 0.44   | 0.65  |
| 0.41 | 10.59  | 18.69   | 30.53   | 51.77   | 0.82 | 0.18 | 0.27 | 0.38   | 0.56  |
| 0.42 | 9.64   | 17.17   | 27.76   | 47.38   | 0.83 | 0.16 | 0.23 | 0.33   | 0.48  |
| 0.43 | 8.77   | 15.68   | 25.22   | 42.82   | 0.84 | 0.13 | 0.20 | 0.28   | 0.41  |
| 0.44 | 8.03   | 14.28   | 23.08   | 38.40   | 0.85 | 0.12 | 0.17 | 0.24   | 0.34  |
| 0.45 | 7.34   | 13.01   | 20.99   | 35.28   | 0.86 | 0.10 | 0.15 | 0.20   | 0.29  |
| 0.46 | 6.69   | 11.83   | 19.08   | 32.16   | 0.87 | 0.09 | 0.13 | 0.17   | 0.25  |
| 0.47 | 6.12   | 10.82   | 17.32   | 29.57   | 0.88 | 0.07 | 0.11 | 0.14   | 0.21  |
| 0.48 | 5.56   | 9.89    | 15.78   | 27.11   | 0.89 | 0.06 | 0.09 | 0.12   | 0.17  |
| 0.49 | 5.09   | 9.00    | 14.44   | 24.56   | 0.90 | 0.05 | 0.08 | 0.10   | 0.14  |
| 0.50 | 4.68   | 8.17    | 13.09   | 22.42   |      |      |      |        |       |

Table S201: Critical values for detector  $\hat{H}_{mov}^{m,0.2}$  with windows size  $n = 0.2$ , and IM-OLS estimation in a model with intercept. The number of integrated regressors is 2 and the highest power of  $x_{kt}$  is 1.

| m    | 90 %   | 95 %   | 97,5 %  | 99 %    | m    | 90 % | 95 % | 97,5 % | 99 % |
|------|--------|--------|---------|---------|------|------|------|--------|------|
| 0.10 | 366.31 | 648.56 | 1025.11 | 1681.26 | 0.51 | 2.48 | 4.08 | 6.10   | 9.72 |
| 0.11 | 293.00 | 510.21 | 797.46  | 1311.32 | 0.52 | 2.27 | 3.71 | 5.62   | 8.91 |
| 0.12 | 235.13 | 412.88 | 656.59  | 1071.36 | 0.53 | 2.04 | 3.34 | 5.12   | 8.10 |
| 0.13 | 192.15 | 338.42 | 536.78  | 895.86  | 0.54 | 1.85 | 3.06 | 4.60   | 7.28 |
| 0.14 | 160.60 | 279.31 | 442.43  | 740.13  | 0.55 | 1.70 | 2.77 | 4.15   | 6.44 |
| 0.15 | 135.29 | 236.27 | 371.28  | 623.19  | 0.56 | 1.56 | 2.50 | 3.75   | 5.86 |
| 0.16 | 115.12 | 198.59 | 315.61  | 515.02  | 0.57 | 1.41 | 2.28 | 3.35   | 5.28 |
| 0.17 | 98.65  | 170.62 | 269.47  | 433.03  | 0.58 | 1.27 | 2.07 | 3.05   | 4.73 |
| 0.18 | 84.47  | 145.81 | 229.97  | 374.48  | 0.59 | 1.17 | 1.87 | 2.76   | 4.23 |
| 0.19 | 72.57  | 126.26 | 198.05  | 328.50  | 0.60 | 1.06 | 1.70 | 2.47   | 3.82 |
| 0.20 | 63.61  | 110.25 | 173.25  | 282.88  | 0.61 | 0.96 | 1.53 | 2.25   | 3.43 |
| 0.21 | 55.47  | 95.98  | 151.67  | 248.48  | 0.62 | 0.86 | 1.36 | 1.99   | 3.07 |
| 0.22 | 48.59  | 84.34  | 132.56  | 217.97  | 0.63 | 0.79 | 1.23 | 1.80   | 2.72 |
| 0.23 | 42.72  | 73.52  | 115.77  | 189.69  | 0.64 | 0.71 | 1.11 | 1.63   | 2.47 |
| 0.24 | 37.73  | 65.15  | 102.67  | 167.83  | 0.65 | 0.64 | 1.00 | 1.45   | 2.19 |
| 0.25 | 33.76  | 57.89  | 89.33   | 148.75  | 0.66 | 0.58 | 0.90 | 1.29   | 1.94 |
| 0.26 | 29.92  | 51.25  | 79.83   | 132.31  | 0.67 | 0.52 | 0.81 | 1.16   | 1.69 |
| 0.27 | 26.64  | 45.60  | 71.05   | 116.67  | 0.68 | 0.47 | 0.72 | 1.04   | 1.53 |
| 0.28 | 23.69  | 40.63  | 63.59   | 104.73  | 0.69 | 0.42 | 0.64 | 0.91   | 1.36 |
| 0.29 | 21.12  | 36.45  | 56.43   | 92.18   | 0.70 | 0.38 | 0.57 | 0.81   | 1.19 |
| 0.30 | 18.97  | 32.39  | 50.23   | 82.30   | 0.71 | 0.34 | 0.51 | 0.71   | 1.06 |
| 0.31 | 17.02  | 28.84  | 44.57   | 74.17   | 0.72 | 0.31 | 0.46 | 0.63   | 0.94 |
| 0.32 | 15.37  | 26.20  | 40.38   | 65.94   | 0.73 | 0.28 | 0.40 | 0.56   | 0.81 |
| 0.33 | 13.87  | 23.64  | 36.30   | 59.73   | 0.74 | 0.25 | 0.36 | 0.49   | 0.72 |
| 0.34 | 12.54  | 21.40  | 32.58   | 53.91   | 0.75 | 0.22 | 0.32 | 0.43   | 0.62 |
| 0.35 | 11.36  | 19.36  | 29.48   | 48.23   | 0.76 | 0.20 | 0.28 | 0.38   | 0.54 |
| 0.36 | 10.28  | 17.65  | 26.91   | 43.33   | 0.77 | 0.18 | 0.25 | 0.34   | 0.47 |
| 0.37 | 9.28   | 15.88  | 24.17   | 38.85   | 0.78 | 0.16 | 0.23 | 0.30   | 0.42 |
| 0.38 | 8.44   | 14.39  | 22.19   | 35.17   | 0.79 | 0.15 | 0.20 | 0.27   | 0.36 |
| 0.39 | 7.67   | 13.04  | 20.13   | 31.74   | 0.80 | 0.13 | 0.18 | 0.24   | 0.31 |
| 0.40 | 6.94   | 11.77  | 18.09   | 28.99   | 0.81 | 0.12 | 0.16 | 0.21   | 0.28 |
| 0.41 | 6.34   | 10.73  | 16.65   | 26.03   | 0.82 | 0.11 | 0.15 | 0.19   | 0.25 |
| 0.42 | 5.76   | 9.80   | 15.12   | 23.65   | 0.83 | 0.10 | 0.13 | 0.17   | 0.22 |
| 0.43 | 5.29   | 8.86   | 13.56   | 21.88   | 0.84 | 0.09 | 0.12 | 0.16   | 0.20 |
| 0.44 | 4.83   | 8.13   | 12.45   | 20.04   | 0.85 | 0.08 | 0.11 | 0.14   | 0.19 |
| 0.45 | 4.35   | 7.33   | 11.22   | 18.08   | 0.86 | 0.08 | 0.10 | 0.13   | 0.18 |
| 0.46 | 3.97   | 6.62   | 10.22   | 15.97   | 0.87 | 0.07 | 0.10 | 0.13   | 0.17 |
| 0.47 | 3.62   | 6.03   | 9.24    | 14.57   | 0.88 | 0.07 | 0.09 | 0.12   | 0.16 |
| 0.48 | 3.29   | 5.41   | 8.19    | 13.32   | 0.89 | 0.06 | 0.09 | 0.12   | 0.15 |
| 0.49 | 2.98   | 4.94   | 7.52    | 11.87   | 0.90 | 0.06 | 0.08 | 0.11   | 0.15 |
| 0.50 | 2.72   | 4.49   | 6.81    | 10.73   |      |      |      |        |      |

Table S202: Critical values for detector  $\hat{H}_{mov}^{m,0.3}$  with windows size  $n = 0.3$ , and FM-OLS and D-OLS estimation in a model with intercept. The number of integrated regressors is 2 and the highest power of  $x_{kt}$  is 1.

| m    | 90 %   | 95 %    | 97,5 %  | 99 %    | m    | 90 % | 95 % | 97,5 % | 99 %  |
|------|--------|---------|---------|---------|------|------|------|--------|-------|
| 0.10 | 741.82 | 1372.52 | 2249.74 | 3889.85 | 0.51 | 4.88 | 8.43 | 13.53  | 23.23 |
| 0.11 | 584.54 | 1068.11 | 1798.29 | 3058.90 | 0.52 | 4.45 | 7.63 | 12.26  | 20.92 |
| 0.12 | 471.71 | 871.69  | 1448.86 | 2520.63 | 0.53 | 4.05 | 6.95 | 11.21  | 18.97 |
| 0.13 | 389.89 | 716.90  | 1191.75 | 2093.95 | 0.54 | 3.69 | 6.35 | 10.24  | 17.11 |
| 0.14 | 323.74 | 596.34  | 998.44  | 1727.87 | 0.55 | 3.36 | 5.78 | 9.22   | 15.32 |
| 0.15 | 270.80 | 497.67  | 828.88  | 1445.05 | 0.56 | 3.06 | 5.24 | 8.27   | 13.69 |
| 0.16 | 228.33 | 420.29  | 691.70  | 1249.46 | 0.57 | 2.78 | 4.73 | 7.41   | 12.47 |
| 0.17 | 194.96 | 359.19  | 594.92  | 1041.24 | 0.58 | 2.54 | 4.30 | 6.72   | 11.26 |
| 0.18 | 167.37 | 305.78  | 504.94  | 897.51  | 0.59 | 2.31 | 3.91 | 6.12   | 10.20 |
| 0.19 | 145.29 | 266.89  | 440.69  | 766.46  | 0.60 | 2.09 | 3.55 | 5.51   | 9.29  |
| 0.20 | 128.05 | 234.91  | 381.16  | 669.09  | 0.61 | 1.90 | 3.20 | 4.98   | 8.34  |
| 0.21 | 111.65 | 204.56  | 331.90  | 584.16  | 0.62 | 1.73 | 2.91 | 4.52   | 7.45  |
| 0.22 | 97.96  | 179.07  | 292.47  | 519.15  | 0.63 | 1.56 | 2.62 | 4.06   | 6.72  |
| 0.23 | 86.52  | 157.83  | 257.57  | 450.73  | 0.64 | 1.41 | 2.37 | 3.65   | 5.96  |
| 0.24 | 75.81  | 138.96  | 228.73  | 402.80  | 0.65 | 1.28 | 2.12 | 3.29   | 5.29  |
| 0.25 | 67.18  | 121.89  | 202.20  | 360.43  | 0.66 | 1.15 | 1.89 | 2.94   | 4.77  |
| 0.26 | 59.58  | 108.80  | 180.91  | 322.93  | 0.67 | 1.04 | 1.71 | 2.62   | 4.30  |
| 0.27 | 53.06  | 97.15   | 159.56  | 283.15  | 0.68 | 0.94 | 1.54 | 2.34   | 3.83  |
| 0.28 | 47.39  | 85.45   | 142.68  | 251.46  | 0.69 | 0.84 | 1.38 | 2.09   | 3.35  |
| 0.29 | 42.35  | 76.42   | 124.85  | 224.10  | 0.70 | 0.76 | 1.23 | 1.86   | 2.96  |
| 0.30 | 37.89  | 68.61   | 112.69  | 200.88  | 0.71 | 0.68 | 1.10 | 1.64   | 2.61  |
| 0.31 | 33.96  | 61.46   | 101.32  | 176.03  | 0.72 | 0.61 | 0.98 | 1.46   | 2.30  |
| 0.32 | 30.51  | 54.90   | 90.38   | 157.01  | 0.73 | 0.54 | 0.87 | 1.29   | 2.01  |
| 0.33 | 27.58  | 49.50   | 81.36   | 139.21  | 0.74 | 0.48 | 0.77 | 1.13   | 1.77  |
| 0.34 | 24.83  | 44.46   | 72.96   | 123.69  | 0.75 | 0.43 | 0.68 | 1.00   | 1.55  |
| 0.35 | 22.41  | 40.38   | 64.78   | 112.00  | 0.76 | 0.39 | 0.60 | 0.88   | 1.35  |
| 0.36 | 20.14  | 36.19   | 59.17   | 101.13  | 0.77 | 0.34 | 0.53 | 0.77   | 1.18  |
| 0.37 | 18.27  | 32.93   | 52.83   | 92.97   | 0.78 | 0.30 | 0.46 | 0.67   | 1.01  |
| 0.38 | 16.56  | 29.55   | 47.65   | 83.43   | 0.79 | 0.27 | 0.41 | 0.58   | 0.88  |
| 0.39 | 15.03  | 26.73   | 43.26   | 76.19   | 0.80 | 0.24 | 0.36 | 0.50   | 0.76  |
| 0.40 | 13.68  | 24.27   | 39.25   | 67.64   | 0.81 | 0.21 | 0.31 | 0.44   | 0.65  |
| 0.41 | 12.48  | 22.04   | 35.75   | 61.03   | 0.82 | 0.18 | 0.27 | 0.38   | 0.56  |
| 0.42 | 11.31  | 20.12   | 32.48   | 55.41   | 0.83 | 0.16 | 0.24 | 0.33   | 0.48  |
| 0.43 | 10.25  | 18.34   | 29.56   | 50.04   | 0.84 | 0.14 | 0.20 | 0.28   | 0.41  |
| 0.44 | 9.38   | 16.66   | 26.89   | 44.95   | 0.85 | 0.12 | 0.18 | 0.24   | 0.34  |
| 0.45 | 8.53   | 15.12   | 24.27   | 41.07   | 0.86 | 0.10 | 0.15 | 0.21   | 0.29  |
| 0.46 | 7.78   | 13.68   | 22.06   | 37.29   | 0.87 | 0.09 | 0.13 | 0.17   | 0.25  |
| 0.47 | 7.11   | 12.50   | 19.94   | 34.19   | 0.88 | 0.08 | 0.11 | 0.15   | 0.21  |
| 0.48 | 6.45   | 11.37   | 18.17   | 30.88   | 0.89 | 0.07 | 0.09 | 0.13   | 0.18  |
| 0.49 | 5.88   | 10.36   | 16.42   | 28.00   | 0.90 | 0.06 | 0.08 | 0.11   | 0.15  |
| 0.50 | 5.39   | 9.38    | 14.93   | 25.71   |      |      |      |        |       |

Table S203: Critical values for detector  $\hat{H}_{mov}^{m,0.3}$  with windows size  $n = 0.3$ , and IM-OLS estimation in a model with intercept. The number of integrated regressors is 2 and the highest power of  $x_{kt}$  is 1.

| m    | 90 %    | 95 %    | 97,5 %  | 99 %     | m    | 90 % | 95 % | 97,5 % | 99 %  |
|------|---------|---------|---------|----------|------|------|------|--------|-------|
| 0.10 | 3716.87 | 5993.04 | 8908.75 | 13393.68 | 0.51 | 4.38 | 6.94 | 10.17  | 15.55 |
| 0.11 | 2595.45 | 4180.14 | 6231.25 | 9630.05  | 0.52 | 3.92 | 6.19 | 9.18   | 14.16 |
| 0.12 | 1922.56 | 3062.63 | 4529.67 | 6997.10  | 0.53 | 3.50 | 5.56 | 8.19   | 12.60 |
| 0.13 | 1430.03 | 2290.15 | 3402.70 | 5268.35  | 0.54 | 3.14 | 4.98 | 7.37   | 11.16 |
| 0.14 | 1088.87 | 1738.53 | 2565.74 | 4047.24  | 0.55 | 2.80 | 4.45 | 6.52   | 10.11 |
| 0.15 | 841.13  | 1351.63 | 1978.54 | 3120.86  | 0.56 | 2.52 | 3.96 | 5.86   | 8.96  |
| 0.16 | 656.00  | 1056.93 | 1564.04 | 2422.31  | 0.57 | 2.26 | 3.59 | 5.22   | 8.06  |
| 0.17 | 524.86  | 849.66  | 1254.12 | 1958.99  | 0.58 | 2.05 | 3.24 | 4.72   | 7.12  |
| 0.18 | 421.86  | 684.25  | 1005.98 | 1574.56  | 0.59 | 1.83 | 2.89 | 4.13   | 6.32  |
| 0.19 | 343.73  | 547.77  | 813.29  | 1270.44  | 0.60 | 1.65 | 2.55 | 3.72   | 5.62  |
| 0.20 | 281.17  | 454.85  | 672.38  | 1034.99  | 0.61 | 1.48 | 2.29 | 3.30   | 4.92  |
| 0.21 | 233.31  | 374.61  | 553.45  | 848.82   | 0.62 | 1.31 | 2.04 | 2.94   | 4.39  |
| 0.22 | 194.17  | 309.46  | 462.12  | 710.28   | 0.63 | 1.18 | 1.83 | 2.64   | 3.90  |
| 0.23 | 162.45  | 262.60  | 389.00  | 606.38   | 0.64 | 1.06 | 1.65 | 2.36   | 3.48  |
| 0.24 | 139.24  | 221.51  | 327.36  | 510.81   | 0.65 | 0.94 | 1.45 | 2.08   | 3.12  |
| 0.25 | 117.15  | 187.21  | 275.99  | 429.44   | 0.66 | 0.85 | 1.30 | 1.86   | 2.78  |
| 0.26 | 100.10  | 159.45  | 234.51  | 365.32   | 0.67 | 0.76 | 1.17 | 1.66   | 2.49  |
| 0.27 | 85.64   | 137.08  | 200.01  | 305.95   | 0.68 | 0.67 | 1.04 | 1.48   | 2.18  |
| 0.28 | 73.00   | 116.71  | 173.86  | 271.43   | 0.69 | 0.60 | 0.92 | 1.31   | 1.92  |
| 0.29 | 62.96   | 101.15  | 150.58  | 232.34   | 0.70 | 0.53 | 0.82 | 1.15   | 1.70  |
| 0.30 | 54.96   | 87.96   | 131.56  | 203.31   | 0.71 | 0.47 | 0.72 | 1.02   | 1.50  |
| 0.31 | 47.59   | 76.51   | 113.88  | 178.84   | 0.72 | 0.42 | 0.64 | 0.91   | 1.34  |
| 0.32 | 41.56   | 66.90   | 99.76   | 155.22   | 0.73 | 0.37 | 0.56 | 0.79   | 1.16  |
| 0.33 | 36.35   | 58.26   | 87.47   | 137.51   | 0.74 | 0.32 | 0.49 | 0.69   | 1.01  |
| 0.34 | 32.09   | 51.33   | 77.15   | 121.02   | 0.75 | 0.28 | 0.43 | 0.60   | 0.87  |
| 0.35 | 28.21   | 45.22   | 67.27   | 104.79   | 0.76 | 0.25 | 0.37 | 0.52   | 0.77  |
| 0.36 | 24.93   | 39.68   | 59.16   | 92.45    | 0.77 | 0.22 | 0.33 | 0.45   | 0.66  |
| 0.37 | 21.95   | 35.12   | 52.62   | 81.87    | 0.78 | 0.19 | 0.28 | 0.39   | 0.56  |
| 0.38 | 19.39   | 30.91   | 46.84   | 72.77    | 0.79 | 0.17 | 0.25 | 0.34   | 0.48  |
| 0.39 | 17.11   | 27.50   | 40.87   | 63.97    | 0.80 | 0.14 | 0.21 | 0.29   | 0.41  |
| 0.40 | 15.24   | 24.58   | 36.47   | 56.76    | 0.81 | 0.12 | 0.18 | 0.25   | 0.35  |
| 0.41 | 13.55   | 21.75   | 31.94   | 50.08    | 0.82 | 0.11 | 0.16 | 0.21   | 0.30  |
| 0.42 | 12.10   | 19.43   | 28.73   | 45.21    | 0.83 | 0.09 | 0.13 | 0.18   | 0.25  |
| 0.43 | 10.75   | 17.26   | 25.58   | 39.80    | 0.84 | 0.08 | 0.11 | 0.15   | 0.21  |
| 0.44 | 9.65    | 15.41   | 22.66   | 35.16    | 0.85 | 0.06 | 0.09 | 0.13   | 0.17  |
| 0.45 | 8.58    | 13.76   | 20.46   | 31.40    | 0.86 | 0.05 | 0.08 | 0.10   | 0.14  |
| 0.46 | 7.61    | 12.16   | 18.04   | 27.99    | 0.87 | 0.04 | 0.06 | 0.08   | 0.11  |
| 0.47 | 6.87    | 10.87   | 16.17   | 24.71    | 0.88 | 0.04 | 0.05 | 0.07   | 0.09  |
| 0.48 | 6.10    | 9.73    | 14.31   | 21.87    | 0.89 | 0.03 | 0.04 | 0.05   | 0.07  |
| 0.49 | 5.42    | 8.61    | 12.64   | 19.65    | 0.90 | 0.02 | 0.03 | 0.04   | 0.06  |
| 0.50 | 4.89    | 7.81    | 11.41   | 17.42    |      |      |      |        |       |

Table S204: Critical values for detector  $\hat{H}_{mov}^{m,0.1}$  with windows size  $n = 0.1$ , and FM-OLS and D-OLS estimation in a model with intercept and linear trend. The number of integrated regressors is 2 and the highest power of  $x_{kt}$  is 1.

| m    | 90 %    | 95 %     | 97,5 %   | 99 %     | m    | 90 % | 95 %  | 97,5 % | 99 %  |
|------|---------|----------|----------|----------|------|------|-------|--------|-------|
| 0.10 | 7102.26 | 12080.89 | 18599.23 | 30976.56 | 0.51 | 8.42 | 13.95 | 21.56  | 34.69 |
| 0.11 | 5056.92 | 8481.89  | 13134.35 | 21911.41 | 0.52 | 7.52 | 12.52 | 19.22  | 30.82 |
| 0.12 | 3648.55 | 6109.77  | 9585.60  | 15700.38 | 0.53 | 6.74 | 11.34 | 17.34  | 27.40 |
| 0.13 | 2755.76 | 4575.53  | 6971.68  | 11249.69 | 0.54 | 6.04 | 10.07 | 15.35  | 24.72 |
| 0.14 | 2086.55 | 3510.38  | 5361.02  | 8520.60  | 0.55 | 5.41 | 9.01  | 13.79  | 21.99 |
| 0.15 | 1613.74 | 2684.86  | 4103.05  | 6786.06  | 0.56 | 4.86 | 8.03  | 12.40  | 19.79 |
| 0.16 | 1271.90 | 2136.34  | 3321.46  | 5319.93  | 0.57 | 4.36 | 7.22  | 11.17  | 18.04 |
| 0.17 | 1012.81 | 1686.71  | 2655.70  | 4314.94  | 0.58 | 3.90 | 6.50  | 10.06  | 15.99 |
| 0.18 | 810.00  | 1366.72  | 2132.68  | 3491.78  | 0.59 | 3.50 | 5.80  | 9.05   | 14.28 |
| 0.19 | 655.72  | 1111.88  | 1712.01  | 2871.18  | 0.60 | 3.13 | 5.18  | 7.97   | 12.71 |
| 0.20 | 536.88  | 907.86   | 1412.08  | 2358.95  | 0.61 | 2.81 | 4.64  | 7.05   | 11.32 |
| 0.21 | 444.35  | 757.13   | 1175.52  | 1926.54  | 0.62 | 2.50 | 4.13  | 6.19   | 10.11 |
| 0.22 | 372.30  | 628.69   | 978.10   | 1603.22  | 0.63 | 2.25 | 3.68  | 5.53   | 8.82  |
| 0.23 | 312.49  | 529.16   | 830.14   | 1348.11  | 0.64 | 2.03 | 3.29  | 4.93   | 7.83  |
| 0.24 | 264.26  | 444.93   | 701.29   | 1150.12  | 0.65 | 1.82 | 2.94  | 4.41   | 6.97  |
| 0.25 | 223.64  | 380.75   | 587.97   | 963.70   | 0.66 | 1.62 | 2.62  | 3.95   | 6.20  |
| 0.26 | 192.08  | 322.83   | 504.57   | 806.62   | 0.67 | 1.45 | 2.35  | 3.50   | 5.51  |
| 0.27 | 163.03  | 275.41   | 426.79   | 695.86   | 0.68 | 1.29 | 2.10  | 3.10   | 4.90  |
| 0.28 | 140.27  | 236.22   | 368.70   | 604.94   | 0.69 | 1.15 | 1.85  | 2.76   | 4.35  |
| 0.29 | 121.72  | 203.87   | 312.98   | 518.48   | 0.70 | 1.02 | 1.65  | 2.48   | 3.82  |
| 0.30 | 105.43  | 177.34   | 272.57   | 461.51   | 0.71 | 0.91 | 1.46  | 2.17   | 3.40  |
| 0.31 | 91.41   | 153.72   | 239.51   | 398.67   | 0.72 | 0.81 | 1.29  | 1.90   | 3.00  |
| 0.32 | 79.80   | 133.86   | 209.31   | 352.00   | 0.73 | 0.71 | 1.13  | 1.67   | 2.64  |
| 0.33 | 69.79   | 117.81   | 183.54   | 303.67   | 0.74 | 0.63 | 1.00  | 1.48   | 2.30  |
| 0.34 | 61.39   | 104.31   | 159.38   | 263.80   | 0.75 | 0.55 | 0.88  | 1.30   | 2.02  |
| 0.35 | 54.01   | 91.63    | 141.62   | 232.84   | 0.76 | 0.49 | 0.77  | 1.12   | 1.73  |
| 0.36 | 47.62   | 80.89    | 124.88   | 208.79   | 0.77 | 0.43 | 0.67  | 0.97   | 1.48  |
| 0.37 | 42.08   | 71.14    | 109.94   | 181.77   | 0.78 | 0.38 | 0.59  | 0.84   | 1.27  |
| 0.38 | 36.97   | 62.92    | 98.53    | 160.02   | 0.79 | 0.33 | 0.51  | 0.72   | 1.09  |
| 0.39 | 32.58   | 55.52    | 87.10    | 143.53   | 0.80 | 0.29 | 0.44  | 0.63   | 0.95  |
| 0.40 | 29.04   | 49.31    | 77.13    | 126.25   | 0.81 | 0.25 | 0.38  | 0.54   | 0.80  |
| 0.41 | 25.88   | 43.57    | 68.09    | 112.62   | 0.82 | 0.21 | 0.33  | 0.46   | 0.68  |
| 0.42 | 22.94   | 38.75    | 60.08    | 99.21    | 0.83 | 0.18 | 0.28  | 0.40   | 0.58  |
| 0.43 | 20.49   | 34.54    | 53.07    | 88.18    | 0.84 | 0.16 | 0.24  | 0.34   | 0.49  |
| 0.44 | 18.31   | 30.81    | 47.57    | 78.39    | 0.85 | 0.14 | 0.20  | 0.28   | 0.41  |
| 0.45 | 16.36   | 27.64    | 42.47    | 69.94    | 0.86 | 0.12 | 0.17  | 0.24   | 0.34  |
| 0.46 | 14.58   | 24.52    | 37.86    | 61.82    | 0.87 | 0.10 | 0.14  | 0.20   | 0.28  |
| 0.47 | 13.00   | 21.83    | 33.69    | 55.21    | 0.88 | 0.08 | 0.12  | 0.16   | 0.23  |
| 0.48 | 11.71   | 19.47    | 30.14    | 49.46    | 0.89 | 0.07 | 0.10  | 0.13   | 0.19  |
| 0.49 | 10.49   | 17.41    | 27.11    | 43.86    | 0.90 | 0.05 | 0.08  | 0.11   | 0.15  |
| 0.50 | 9.41    | 15.56    | 24.20    | 38.69    |      |      |       |        |       |

Table S205: Critical values for detector  $\hat{H}_{mov}^{m,0.1}$  with windows size  $n = 0.1$ , and IM-OLS estimation in a model with intercept and linear trend. The number of integrated regressors is 2 and the highest power of  $x_{kt}$  is 1.

| m    | 90 %    | 95 %    | 97,5 %   | 99 %     | m    | 90 % | 95 %  | 97,5 % | 99 %  |
|------|---------|---------|----------|----------|------|------|-------|--------|-------|
| 0.10 | 5115.11 | 8271.86 | 12421.51 | 19131.03 | 0.51 | 6.32 | 10.06 | 14.74  | 22.50 |
| 0.11 | 3630.96 | 5870.13 | 8825.02  | 13711.10 | 0.52 | 5.64 | 9.01  | 13.22  | 20.38 |
| 0.12 | 2720.88 | 4355.55 | 6493.64  | 10169.27 | 0.53 | 5.04 | 8.00  | 11.74  | 18.01 |
| 0.13 | 2030.94 | 3279.39 | 4931.17  | 7656.55  | 0.54 | 4.48 | 7.14  | 10.49  | 15.84 |
| 0.14 | 1562.98 | 2535.08 | 3748.42  | 5924.74  | 0.55 | 4.01 | 6.33  | 9.23   | 14.38 |
| 0.15 | 1216.29 | 1974.99 | 2933.60  | 4619.57  | 0.56 | 3.58 | 5.61  | 8.30   | 12.54 |
| 0.16 | 957.34  | 1551.76 | 2320.74  | 3583.37  | 0.57 | 3.19 | 5.04  | 7.30   | 11.25 |
| 0.17 | 772.48  | 1252.30 | 1871.70  | 2919.89  | 0.58 | 2.88 | 4.52  | 6.58   | 9.90  |
| 0.18 | 620.37  | 1018.83 | 1504.36  | 2377.96  | 0.59 | 2.56 | 4.04  | 5.77   | 8.74  |
| 0.19 | 508.60  | 820.31  | 1222.02  | 1922.56  | 0.60 | 2.29 | 3.53  | 5.16   | 7.67  |
| 0.20 | 416.73  | 682.59  | 1014.98  | 1564.46  | 0.61 | 2.04 | 3.17  | 4.57   | 6.75  |
| 0.21 | 347.30  | 565.11  | 838.06   | 1295.61  | 0.62 | 1.80 | 2.82  | 4.01   | 5.97  |
| 0.22 | 290.34  | 467.22  | 701.50   | 1077.78  | 0.63 | 1.61 | 2.49  | 3.59   | 5.27  |
| 0.23 | 242.74  | 397.79  | 590.59   | 924.10   | 0.64 | 1.43 | 2.23  | 3.16   | 4.66  |
| 0.24 | 209.09  | 336.09  | 499.84   | 779.82   | 0.65 | 1.27 | 1.95  | 2.78   | 4.14  |
| 0.25 | 176.29  | 283.72  | 419.76   | 659.27   | 0.66 | 1.13 | 1.73  | 2.48   | 3.69  |
| 0.26 | 151.03  | 241.85  | 357.28   | 558.72   | 0.67 | 1.00 | 1.54  | 2.18   | 3.25  |
| 0.27 | 128.87  | 208.14  | 305.77   | 465.93   | 0.68 | 0.89 | 1.36  | 1.92   | 2.83  |
| 0.28 | 110.19  | 178.10  | 265.04   | 415.25   | 0.69 | 0.78 | 1.20  | 1.69   | 2.49  |
| 0.29 | 94.96   | 153.68  | 230.36   | 355.95   | 0.70 | 0.69 | 1.05  | 1.48   | 2.17  |
| 0.30 | 82.76   | 133.81  | 200.44   | 313.79   | 0.71 | 0.61 | 0.92  | 1.30   | 1.90  |
| 0.31 | 71.79   | 116.24  | 173.64   | 274.66   | 0.72 | 0.53 | 0.81  | 1.14   | 1.67  |
| 0.32 | 62.61   | 101.31  | 151.84   | 237.72   | 0.73 | 0.46 | 0.70  | 0.99   | 1.44  |
| 0.33 | 54.71   | 88.46   | 132.74   | 209.45   | 0.74 | 0.40 | 0.60  | 0.85   | 1.24  |
| 0.34 | 48.29   | 77.85   | 116.94   | 183.59   | 0.75 | 0.35 | 0.52  | 0.73   | 1.05  |
| 0.35 | 42.35   | 68.26   | 101.81   | 159.30   | 0.76 | 0.30 | 0.45  | 0.63   | 0.91  |
| 0.36 | 37.41   | 59.76   | 89.85    | 140.63   | 0.77 | 0.26 | 0.39  | 0.54   | 0.78  |
| 0.37 | 32.94   | 53.00   | 79.48    | 124.54   | 0.78 | 0.23 | 0.34  | 0.46   | 0.65  |
| 0.38 | 29.08   | 46.50   | 70.62    | 109.64   | 0.79 | 0.19 | 0.28  | 0.39   | 0.54  |
| 0.39 | 25.59   | 41.31   | 61.45    | 96.26    | 0.80 | 0.17 | 0.24  | 0.32   | 0.46  |
| 0.40 | 22.75   | 36.80   | 54.82    | 85.60    | 0.81 | 0.14 | 0.20  | 0.28   | 0.39  |
| 0.41 | 20.15   | 32.47   | 47.67    | 75.06    | 0.82 | 0.12 | 0.17  | 0.23   | 0.32  |
| 0.42 | 17.92   | 28.91   | 42.92    | 67.64    | 0.83 | 0.10 | 0.14  | 0.19   | 0.27  |
| 0.43 | 15.98   | 25.76   | 38.00    | 59.40    | 0.84 | 0.09 | 0.12  | 0.16   | 0.22  |
| 0.44 | 14.27   | 22.89   | 33.55    | 52.48    | 0.85 | 0.07 | 0.10  | 0.13   | 0.18  |
| 0.45 | 12.66   | 20.31   | 30.19    | 46.69    | 0.86 | 0.06 | 0.09  | 0.11   | 0.15  |
| 0.46 | 11.21   | 17.95   | 26.66    | 41.16    | 0.87 | 0.05 | 0.07  | 0.09   | 0.12  |
| 0.47 | 10.07   | 16.01   | 23.72    | 36.44    | 0.88 | 0.05 | 0.06  | 0.08   | 0.10  |
| 0.48 | 8.94    | 14.24   | 20.97    | 32.02    | 0.89 | 0.04 | 0.05  | 0.07   | 0.08  |
| 0.49 | 7.88    | 12.54   | 18.46    | 28.65    | 0.90 | 0.04 | 0.05  | 0.06   | 0.07  |
| 0.50 | 7.09    | 11.32   | 16.61    | 25.25    |      |      |       |        |       |

Table S206: Critical values for detector  $\hat{H}_{mov}^{m,0.2}$  with windows size  $n = 0.2$ , and FM-OLS and D-OLS estimation in a model with intercept and linear trend. The number of integrated regressors is 2 and the highest power of  $x_{kt}$  is 1.

| m    | 90 %    | 95 %     | 97,5 %   | 99 %     | m    | 90 %  | 95 %  | 97,5 % | 99 %  |
|------|---------|----------|----------|----------|------|-------|-------|--------|-------|
| 0.10 | 9743.56 | 16766.63 | 25985.45 | 43327.95 | 0.51 | 12.18 | 20.23 | 31.12  | 50.26 |
| 0.11 | 7027.14 | 11873.45 | 18534.54 | 31558.94 | 0.52 | 10.86 | 18.10 | 27.79  | 44.52 |
| 0.12 | 5149.02 | 8664.16  | 13588.84 | 22557.96 | 0.53 | 9.65  | 16.28 | 24.85  | 39.30 |
| 0.13 | 3900.87 | 6538.97  | 10057.96 | 16354.99 | 0.54 | 8.65  | 14.44 | 21.99  | 35.15 |
| 0.14 | 2989.96 | 5070.07  | 7775.27  | 12462.77 | 0.55 | 7.70  | 12.83 | 19.57  | 31.17 |
| 0.15 | 2324.69 | 3901.18  | 6067.46  | 10021.37 | 0.56 | 6.88  | 11.40 | 17.57  | 28.01 |
| 0.16 | 1839.93 | 3125.07  | 4889.45  | 7899.39  | 0.57 | 6.13  | 10.22 | 15.65  | 25.32 |
| 0.17 | 1478.32 | 2490.27  | 3927.38  | 6442.22  | 0.58 | 5.49  | 9.13  | 14.10  | 22.39 |
| 0.18 | 1184.87 | 2026.94  | 3179.94  | 5212.47  | 0.59 | 4.89  | 8.10  | 12.61  | 19.75 |
| 0.19 | 965.75  | 1648.93  | 2575.34  | 4321.64  | 0.60 | 4.36  | 7.21  | 11.07  | 17.67 |
| 0.20 | 797.41  | 1355.74  | 2120.52  | 3542.24  | 0.61 | 3.89  | 6.40  | 9.78   | 15.57 |
| 0.21 | 660.02  | 1137.19  | 1773.95  | 2913.66  | 0.62 | 3.44  | 5.69  | 8.51   | 13.79 |
| 0.22 | 554.73  | 945.89   | 1480.58  | 2443.91  | 0.63 | 3.06  | 5.04  | 7.52   | 12.04 |
| 0.23 | 467.19  | 796.75   | 1257.98  | 2038.78  | 0.64 | 2.75  | 4.47  | 6.65   | 10.55 |
| 0.24 | 394.56  | 672.49   | 1063.32  | 1749.23  | 0.65 | 2.46  | 3.97  | 5.92   | 9.27  |
| 0.25 | 336.15  | 576.46   | 894.80   | 1470.73  | 0.66 | 2.18  | 3.50  | 5.27   | 8.22  |
| 0.26 | 287.74  | 488.67   | 768.72   | 1234.17  | 0.67 | 1.94  | 3.11  | 4.64   | 7.23  |
| 0.27 | 244.51  | 416.56   | 648.82   | 1069.28  | 0.68 | 1.71  | 2.78  | 4.09   | 6.37  |
| 0.28 | 210.64  | 358.61   | 561.94   | 922.15   | 0.69 | 1.51  | 2.44  | 3.60   | 5.62  |
| 0.29 | 183.53  | 309.36   | 477.30   | 791.17   | 0.70 | 1.34  | 2.14  | 3.19   | 4.91  |
| 0.30 | 158.81  | 269.01   | 414.74   | 699.56   | 0.71 | 1.18  | 1.88  | 2.79   | 4.31  |
| 0.31 | 137.13  | 232.48   | 362.61   | 604.89   | 0.72 | 1.04  | 1.64  | 2.43   | 3.77  |
| 0.32 | 119.77  | 202.29   | 317.12   | 533.73   | 0.73 | 0.91  | 1.43  | 2.12   | 3.29  |
| 0.33 | 104.71  | 178.39   | 278.48   | 465.02   | 0.74 | 0.80  | 1.25  | 1.85   | 2.84  |
| 0.34 | 92.12   | 157.60   | 242.53   | 403.22   | 0.75 | 0.69  | 1.08  | 1.60   | 2.45  |
| 0.35 | 81.21   | 138.44   | 215.00   | 354.13   | 0.76 | 0.61  | 0.94  | 1.36   | 2.08  |
| 0.36 | 71.34   | 121.55   | 188.63   | 314.39   | 0.77 | 0.53  | 0.82  | 1.17   | 1.77  |
| 0.37 | 63.01   | 106.85   | 166.12   | 273.46   | 0.78 | 0.46  | 0.70  | 1.00   | 1.50  |
| 0.38 | 55.25   | 94.68    | 148.80   | 241.61   | 0.79 | 0.39  | 0.60  | 0.85   | 1.27  |
| 0.39 | 48.61   | 83.01    | 130.99   | 216.77   | 0.80 | 0.34  | 0.51  | 0.73   | 1.08  |
| 0.40 | 43.21   | 73.62    | 115.41   | 189.17   | 0.81 | 0.29  | 0.44  | 0.62   | 0.91  |
| 0.41 | 38.35   | 65.24    | 101.50   | 168.33   | 0.82 | 0.25  | 0.37  | 0.52   | 0.76  |
| 0.42 | 34.06   | 57.61    | 89.80    | 148.17   | 0.83 | 0.21  | 0.31  | 0.44   | 0.64  |
| 0.43 | 30.25   | 51.43    | 79.31    | 131.72   | 0.84 | 0.18  | 0.26  | 0.37   | 0.53  |
| 0.44 | 27.10   | 45.73    | 70.65    | 116.52   | 0.85 | 0.15  | 0.22  | 0.31   | 0.44  |
| 0.45 | 24.15   | 40.86    | 62.94    | 104.04   | 0.86 | 0.12  | 0.18  | 0.25   | 0.36  |
| 0.46 | 21.40   | 36.13    | 55.73    | 91.25    | 0.87 | 0.10  | 0.15  | 0.21   | 0.29  |
| 0.47 | 19.07   | 32.10    | 49.48    | 80.92    | 0.88 | 0.09  | 0.12  | 0.17   | 0.24  |
| 0.48 | 17.08   | 28.50    | 44.02    | 72.07    | 0.89 | 0.07  | 0.10  | 0.14   | 0.19  |
| 0.49 | 15.26   | 25.48    | 39.60    | 63.86    | 0.90 | 0.06  | 0.08  | 0.11   | 0.15  |
| 0.50 | 13.66   | 22.74    | 35.17    | 56.32    |      |       |       |        |       |

Table S207: Critical values for detector  $\hat{H}_{mov}^{m,0.2}$  with windows size  $n = 0.2$ , and IM-OLS estimation in a model with intercept and linear trend. The number of integrated regressors is 2 and the highest power of  $x_{kt}$  is 1.



| m    | 90 %    | 95 %    | 97,5 %   | 99 %     | m    | 90 % | 95 %  | 97,5 % | 99 %  |
|------|---------|---------|----------|----------|------|------|-------|--------|-------|
| 0.10 | 5788.11 | 9456.84 | 14256.90 | 22113.92 | 0.51 | 7.04 | 11.19 | 16.36  | 24.95 |
| 0.11 | 4148.14 | 6743.32 | 10154.85 | 15827.36 | 0.52 | 6.27 | 9.97  | 14.61  | 22.53 |
| 0.12 | 3106.05 | 5015.51 | 7458.22  | 11741.92 | 0.53 | 5.56 | 8.87  | 12.89  | 19.67 |
| 0.13 | 2333.66 | 3788.70 | 5757.31  | 8896.28  | 0.54 | 4.95 | 7.85  | 11.48  | 17.37 |
| 0.14 | 1801.92 | 2928.83 | 4375.31  | 6920.31  | 0.55 | 4.40 | 6.95  | 10.11  | 15.70 |
| 0.15 | 1402.44 | 2292.41 | 3434.76  | 5410.83  | 0.56 | 3.91 | 6.15  | 9.06   | 13.65 |
| 0.16 | 1110.35 | 1804.78 | 2704.18  | 4216.49  | 0.57 | 3.50 | 5.49  | 7.92   | 12.21 |
| 0.17 | 897.70  | 1457.46 | 2190.32  | 3425.36  | 0.58 | 3.13 | 4.91  | 7.15   | 10.71 |
| 0.18 | 720.64  | 1192.95 | 1762.87  | 2788.79  | 0.59 | 2.77 | 4.36  | 6.21   | 9.42  |
| 0.19 | 591.66  | 958.53  | 1440.40  | 2252.14  | 0.60 | 2.46 | 3.81  | 5.54   | 8.25  |
| 0.20 | 485.39  | 799.08  | 1193.65  | 1838.81  | 0.61 | 2.20 | 3.40  | 4.86   | 7.21  |
| 0.21 | 404.44  | 660.23  | 984.98   | 1524.96  | 0.62 | 1.93 | 3.01  | 4.27   | 6.34  |
| 0.22 | 337.30  | 547.00  | 823.88   | 1275.33  | 0.63 | 1.71 | 2.64  | 3.80   | 5.56  |
| 0.23 | 283.31  | 466.42  | 695.25   | 1085.73  | 0.64 | 1.52 | 2.36  | 3.32   | 4.90  |
| 0.24 | 243.36  | 393.49  | 588.26   | 920.79   | 0.65 | 1.34 | 2.06  | 2.91   | 4.33  |
| 0.25 | 205.11  | 331.83  | 491.79   | 771.56   | 0.66 | 1.19 | 1.82  | 2.60   | 3.83  |
| 0.26 | 176.32  | 283.69  | 419.03   | 655.14   | 0.67 | 1.05 | 1.61  | 2.26   | 3.36  |
| 0.27 | 150.02  | 243.45  | 358.33   | 550.86   | 0.68 | 0.92 | 1.41  | 1.99   | 2.91  |
| 0.28 | 127.83  | 207.72  | 309.99   | 489.32   | 0.69 | 0.81 | 1.24  | 1.74   | 2.55  |
| 0.29 | 110.59  | 179.13  | 269.51   | 418.71   | 0.70 | 0.71 | 1.08  | 1.52   | 2.22  |
| 0.30 | 96.01   | 156.19  | 234.53   | 367.04   | 0.71 | 0.62 | 0.94  | 1.33   | 1.92  |
| 0.31 | 83.39   | 135.56  | 202.64   | 319.72   | 0.72 | 0.54 | 0.82  | 1.16   | 1.69  |
| 0.32 | 72.47   | 117.97  | 176.85   | 276.63   | 0.73 | 0.47 | 0.71  | 1.00   | 1.45  |
| 0.33 | 63.38   | 102.59  | 154.45   | 243.26   | 0.74 | 0.41 | 0.61  | 0.86   | 1.25  |
| 0.34 | 55.92   | 90.32   | 135.71   | 213.54   | 0.75 | 0.36 | 0.53  | 0.74   | 1.06  |
| 0.35 | 48.82   | 78.98   | 118.25   | 184.56   | 0.76 | 0.31 | 0.45  | 0.63   | 0.92  |
| 0.36 | 43.10   | 69.09   | 103.93   | 162.41   | 0.77 | 0.27 | 0.39  | 0.54   | 0.78  |
| 0.37 | 37.85   | 61.23   | 91.65    | 143.49   | 0.78 | 0.23 | 0.34  | 0.46   | 0.65  |
| 0.38 | 33.42   | 53.48   | 80.78    | 126.46   | 0.79 | 0.20 | 0.29  | 0.39   | 0.55  |
| 0.39 | 29.42   | 47.40   | 70.53    | 110.65   | 0.80 | 0.17 | 0.24  | 0.33   | 0.46  |
| 0.40 | 26.02   | 42.09   | 62.81    | 97.89    | 0.81 | 0.15 | 0.21  | 0.28   | 0.39  |
| 0.41 | 23.03   | 37.02   | 54.71    | 85.89    | 0.82 | 0.13 | 0.18  | 0.24   | 0.32  |
| 0.42 | 20.49   | 32.90   | 49.02    | 76.98    | 0.83 | 0.11 | 0.15  | 0.20   | 0.27  |
| 0.43 | 18.16   | 29.29   | 43.38    | 67.52    | 0.84 | 0.10 | 0.13  | 0.17   | 0.23  |
| 0.44 | 16.17   | 26.00   | 38.10    | 59.60    | 0.85 | 0.08 | 0.11  | 0.14   | 0.19  |
| 0.45 | 14.31   | 23.02   | 34.26    | 52.71    | 0.86 | 0.07 | 0.10  | 0.12   | 0.16  |
| 0.46 | 12.67   | 20.23   | 30.02    | 46.31    | 0.87 | 0.07 | 0.08  | 0.11   | 0.13  |
| 0.47 | 11.32   | 17.99   | 26.72    | 40.90    | 0.88 | 0.06 | 0.07  | 0.09   | 0.11  |
| 0.48 | 10.03   | 16.00   | 23.55    | 35.85    | 0.89 | 0.05 | 0.07  | 0.08   | 0.10  |
| 0.49 | 8.83    | 14.06   | 20.69    | 31.91    | 0.90 | 0.05 | 0.06  | 0.07   | 0.09  |
| 0.50 | 7.94    | 12.65   | 18.45    | 28.12    |      |      |       |        |       |

Table S208: Critical values for detector  $\hat{H}_{mov}^{m,0.3}$  with windows size  $n = 0.3$ , and FM-OLS and D-OLS estimation in a model with intercept and linear trend. The number of integrated regressors is 2 and the highest power of  $x_{kt}$  is 1.

| m    | 90 %     | 95 %     | 97,5 %   | 99 %     | m    | 90 %  | 95 %  | 97,5 % | 99 %  |
|------|----------|----------|----------|----------|------|-------|-------|--------|-------|
| 0.10 | 11021.44 | 19083.13 | 29998.78 | 49516.44 | 0.51 | 13.57 | 22.47 | 34.54  | 55.79 |
| 0.11 | 7980.11  | 13560.14 | 21302.99 | 36326.81 | 0.52 | 12.05 | 20.06 | 30.80  | 49.36 |
| 0.12 | 5884.40  | 9931.44  | 15626.10 | 26110.87 | 0.53 | 10.73 | 17.97 | 27.43  | 43.14 |
| 0.13 | 4465.52  | 7567.06  | 11655.10 | 18925.18 | 0.54 | 9.57  | 15.91 | 24.18  | 38.59 |
| 0.14 | 3427.18  | 5856.18  | 9017.24  | 14639.01 | 0.55 | 8.48  | 14.05 | 21.43  | 34.07 |
| 0.15 | 2670.31  | 4511.12  | 7082.19  | 11681.38 | 0.56 | 7.55  | 12.51 | 19.12  | 30.48 |
| 0.16 | 2118.22  | 3615.29  | 5699.22  | 9259.65  | 0.57 | 6.68  | 11.13 | 16.99  | 27.47 |
| 0.17 | 1703.75  | 2902.16  | 4575.32  | 7550.04  | 0.58 | 5.98  | 9.90  | 15.26  | 24.26 |
| 0.18 | 1376.48  | 2360.09  | 3712.88  | 6127.33  | 0.59 | 5.32  | 8.77  | 13.57  | 21.25 |
| 0.19 | 1122.31  | 1922.62  | 3012.59  | 5048.21  | 0.60 | 4.71  | 7.80  | 11.92  | 18.93 |
| 0.20 | 926.75   | 1582.69  | 2480.27  | 4162.69  | 0.61 | 4.21  | 6.87  | 10.47  | 16.53 |
| 0.21 | 765.86   | 1327.61  | 2079.49  | 3410.77  | 0.62 | 3.70  | 6.09  | 9.11   | 14.62 |
| 0.22 | 645.74   | 1103.96  | 1739.92  | 2852.69  | 0.63 | 3.26  | 5.37  | 7.99   | 12.72 |
| 0.23 | 543.32   | 931.49   | 1467.71  | 2408.99  | 0.64 | 2.92  | 4.72  | 7.02   | 11.14 |
| 0.24 | 459.36   | 784.66   | 1246.75  | 2056.61  | 0.65 | 2.60  | 4.19  | 6.24   | 9.71  |
| 0.25 | 391.34   | 672.79   | 1047.05  | 1738.72  | 0.66 | 2.30  | 3.68  | 5.52   | 8.58  |
| 0.26 | 333.98   | 570.01   | 899.19   | 1449.53  | 0.67 | 2.04  | 3.26  | 4.86   | 7.49  |
| 0.27 | 283.74   | 486.30   | 759.11   | 1248.12  | 0.68 | 1.79  | 2.89  | 4.26   | 6.60  |
| 0.28 | 245.10   | 418.26   | 656.26   | 1081.53  | 0.69 | 1.58  | 2.53  | 3.72   | 5.80  |
| 0.29 | 212.79   | 359.91   | 559.45   | 921.28   | 0.70 | 1.39  | 2.22  | 3.28   | 5.06  |
| 0.30 | 184.08   | 312.80   | 482.30   | 811.30   | 0.71 | 1.22  | 1.94  | 2.86   | 4.39  |
| 0.31 | 158.61   | 270.60   | 421.17   | 705.77   | 0.72 | 1.07  | 1.69  | 2.48   | 3.83  |
| 0.32 | 138.75   | 234.91   | 369.16   | 622.30   | 0.73 | 0.93  | 1.46  | 2.16   | 3.35  |
| 0.33 | 120.84   | 206.63   | 323.60   | 540.95   | 0.74 | 0.81  | 1.27  | 1.87   | 2.88  |
| 0.34 | 106.38   | 182.29   | 281.79   | 468.60   | 0.75 | 0.70  | 1.10  | 1.62   | 2.47  |
| 0.35 | 93.67    | 160.07   | 248.58   | 410.44   | 0.76 | 0.61  | 0.95  | 1.38   | 2.09  |
| 0.36 | 82.24    | 139.99   | 218.26   | 364.22   | 0.77 | 0.53  | 0.82  | 1.17   | 1.78  |
| 0.37 | 72.54    | 123.25   | 191.32   | 315.24   | 0.78 | 0.46  | 0.71  | 1.00   | 1.51  |
| 0.38 | 63.40    | 108.57   | 170.79   | 277.62   | 0.79 | 0.39  | 0.60  | 0.85   | 1.28  |
| 0.39 | 55.67    | 95.60    | 150.32   | 248.78   | 0.80 | 0.34  | 0.52  | 0.73   | 1.08  |
| 0.40 | 49.52    | 84.06    | 132.36   | 217.52   | 0.81 | 0.29  | 0.44  | 0.62   | 0.91  |
| 0.41 | 43.78    | 74.74    | 116.49   | 192.27   | 0.82 | 0.25  | 0.37  | 0.52   | 0.76  |
| 0.42 | 38.83    | 65.94    | 102.20   | 168.98   | 0.83 | 0.21  | 0.32  | 0.44   | 0.64  |
| 0.43 | 34.41    | 58.53    | 90.45    | 149.92   | 0.84 | 0.18  | 0.27  | 0.37   | 0.53  |
| 0.44 | 30.77    | 51.86    | 79.91    | 132.15   | 0.85 | 0.15  | 0.22  | 0.31   | 0.44  |
| 0.45 | 27.32    | 46.26    | 71.21    | 118.18   | 0.86 | 0.13  | 0.18  | 0.26   | 0.36  |
| 0.46 | 24.20    | 40.64    | 63.22    | 102.95   | 0.87 | 0.11  | 0.15  | 0.21   | 0.30  |
| 0.47 | 21.44    | 36.19    | 55.54    | 91.71    | 0.88 | 0.09  | 0.13  | 0.17   | 0.24  |
| 0.48 | 19.16    | 32.03    | 49.43    | 81.28    | 0.89 | 0.07  | 0.10  | 0.14   | 0.20  |
| 0.49 | 17.06    | 28.49    | 44.28    | 71.40    | 0.90 | 0.06  | 0.09  | 0.11   | 0.16  |
| 0.50 | 15.28    | 25.36    | 39.22    | 62.84    |      |       |       |        |       |

Table S209: Critical values for detector  $\hat{H}_{mov}^{m,0.3}$  with windows size  $n = 0.3$ , and IM-OLS estimation in a model with intercept and linear trend. The number of integrated regressors is 2 and the highest power of  $x_{kt}$  is 1.

| m    | 90 %    | 95 %     | 97,5 %   | 99 %     | m    | 90 % | 95 %  | 97,5 % | 99 %  |
|------|---------|----------|----------|----------|------|------|-------|--------|-------|
| 0.10 | 6658.09 | 16581.97 | 36698.32 | 87273.39 | 0.51 | 6.28 | 14.59 | 29.60  | 65.84 |
| 0.11 | 4767.96 | 12254.53 | 26858.23 | 64012.29 | 0.52 | 5.59 | 12.79 | 26.02  | 57.39 |
| 0.12 | 3512.90 | 8885.51  | 19469.69 | 46828.43 | 0.53 | 4.84 | 11.20 | 22.66  | 49.40 |
| 0.13 | 2606.30 | 6600.22  | 14080.87 | 34658.19 | 0.54 | 4.32 | 10.01 | 20.12  | 43.61 |
| 0.14 | 2063.99 | 5129.45  | 11230.03 | 26994.48 | 0.55 | 3.82 | 8.77  | 17.52  | 39.03 |
| 0.15 | 1602.04 | 4033.78  | 8693.06  | 20981.15 | 0.56 | 3.40 | 7.71  | 15.61  | 34.53 |
| 0.16 | 1241.20 | 3157.46  | 6956.91  | 16456.88 | 0.57 | 3.05 | 6.83  | 13.60  | 30.60 |
| 0.17 | 981.96  | 2485.61  | 5562.48  | 13611.21 | 0.58 | 2.70 | 5.97  | 11.98  | 26.39 |
| 0.18 | 795.55  | 2015.66  | 4482.57  | 10666.85 | 0.59 | 2.39 | 5.22  | 10.43  | 22.83 |
| 0.19 | 645.72  | 1615.65  | 3532.64  | 8534.40  | 0.60 | 2.14 | 4.62  | 9.08   | 19.12 |
| 0.20 | 530.50  | 1323.95  | 2884.10  | 7118.74  | 0.61 | 1.89 | 4.06  | 8.06   | 17.44 |
| 0.21 | 438.36  | 1104.36  | 2378.21  | 5866.31  | 0.62 | 1.67 | 3.58  | 7.12   | 15.47 |
| 0.22 | 364.39  | 917.12   | 1962.23  | 4734.47  | 0.63 | 1.49 | 3.21  | 6.23   | 13.67 |
| 0.23 | 302.72  | 763.15   | 1628.42  | 3894.98  | 0.64 | 1.32 | 2.81  | 5.46   | 12.05 |
| 0.24 | 254.87  | 639.16   | 1353.11  | 3322.21  | 0.65 | 1.17 | 2.48  | 4.81   | 10.08 |
| 0.25 | 214.61  | 541.17   | 1163.54  | 2739.69  | 0.66 | 1.03 | 2.15  | 4.07   | 8.67  |
| 0.26 | 181.18  | 457.91   | 997.93   | 2372.68  | 0.67 | 0.91 | 1.86  | 3.49   | 7.52  |
| 0.27 | 154.25  | 391.28   | 846.69   | 2006.45  | 0.68 | 0.80 | 1.64  | 3.07   | 6.56  |
| 0.28 | 130.94  | 330.65   | 729.70   | 1723.02  | 0.69 | 0.70 | 1.43  | 2.68   | 5.69  |
| 0.29 | 112.69  | 286.33   | 617.68   | 1464.56  | 0.70 | 0.61 | 1.23  | 2.31   | 4.79  |
| 0.30 | 97.52   | 245.18   | 526.31   | 1234.41  | 0.71 | 0.53 | 1.07  | 2.00   | 4.20  |
| 0.31 | 85.31   | 210.71   | 449.65   | 1085.67  | 0.72 | 0.47 | 0.93  | 1.71   | 3.52  |
| 0.32 | 73.49   | 179.65   | 385.55   | 945.73   | 0.73 | 0.41 | 0.80  | 1.45   | 3.02  |
| 0.33 | 62.88   | 153.55   | 327.72   | 750.27   | 0.74 | 0.36 | 0.69  | 1.23   | 2.47  |
| 0.34 | 54.84   | 131.80   | 284.46   | 658.32   | 0.75 | 0.31 | 0.58  | 1.05   | 2.07  |
| 0.35 | 47.17   | 115.19   | 246.27   | 560.34   | 0.76 | 0.27 | 0.50  | 0.89   | 1.77  |
| 0.36 | 41.18   | 100.87   | 214.14   | 485.15   | 0.77 | 0.23 | 0.42  | 0.75   | 1.49  |
| 0.37 | 36.17   | 87.80    | 189.45   | 422.89   | 0.78 | 0.21 | 0.37  | 0.63   | 1.20  |
| 0.38 | 31.42   | 77.46    | 166.66   | 375.86   | 0.79 | 0.18 | 0.31  | 0.53   | 1.00  |
| 0.39 | 27.94   | 67.34    | 144.64   | 334.26   | 0.80 | 0.15 | 0.26  | 0.43   | 0.81  |
| 0.40 | 24.53   | 59.26    | 125.94   | 288.65   | 0.81 | 0.13 | 0.22  | 0.36   | 0.66  |
| 0.41 | 21.44   | 52.24    | 111.31   | 258.88   | 0.82 | 0.11 | 0.19  | 0.30   | 0.54  |
| 0.42 | 19.06   | 45.82    | 95.51    | 221.33   | 0.83 | 0.09 | 0.16  | 0.25   | 0.44  |
| 0.43 | 16.74   | 40.24    | 83.63    | 196.85   | 0.84 | 0.08 | 0.13  | 0.20   | 0.34  |
| 0.44 | 14.92   | 35.41    | 73.47    | 171.40   | 0.85 | 0.07 | 0.11  | 0.16   | 0.28  |
| 0.45 | 13.18   | 30.81    | 63.26    | 150.84   | 0.86 | 0.05 | 0.09  | 0.13   | 0.22  |
| 0.46 | 11.60   | 27.60    | 55.95    | 129.21   | 0.87 | 0.05 | 0.07  | 0.10   | 0.17  |
| 0.47 | 10.29   | 24.09    | 49.95    | 115.48   | 0.88 | 0.04 | 0.06  | 0.08   | 0.13  |
| 0.48 | 9.21    | 21.20    | 44.34    | 100.60   | 0.89 | 0.03 | 0.04  | 0.06   | 0.10  |
| 0.49 | 8.07    | 18.71    | 38.52    | 85.92    | 0.90 | 0.02 | 0.03  | 0.05   | 0.07  |
| 0.50 | 7.07    | 16.40    | 33.31    | 74.61    |      |      |       |        |       |

Table S210: Critical values for detector  $\hat{H}_{mov}^{m,0.1}$  with windows size  $n = 0.1$ , and FM-OLS and D-OLS estimation in a model with intercept. The number of integrated regressors is 2 and the highest power of  $x_{kt}$  is 2.

| m    | 90 %     | 95 %     | 97,5 %    | 99 %      | m    | 90 %  | 95 %  | 97,5 % | 99 %   |
|------|----------|----------|-----------|-----------|------|-------|-------|--------|--------|
| 0.10 | 18038.79 | 48972.42 | 113647.13 | 295846.94 | 0.51 | 16.30 | 42.21 | 92.63  | 228.33 |
| 0.11 | 12968.80 | 35014.92 | 80962.23  | 216457.28 | 0.52 | 14.57 | 36.71 | 81.32  | 198.38 |
| 0.12 | 9559.25  | 25952.95 | 59724.73  | 155451.17 | 0.53 | 12.79 | 31.92 | 72.60  | 177.52 |
| 0.13 | 7176.05  | 19263.00 | 45132.47  | 115085.92 | 0.54 | 11.23 | 28.12 | 63.56  | 154.19 |
| 0.14 | 5420.13  | 14811.00 | 33834.42  | 87989.87  | 0.55 | 9.94  | 25.00 | 55.71  | 133.91 |
| 0.15 | 4241.14  | 11585.35 | 26038.64  | 68849.01  | 0.56 | 8.82  | 21.82 | 47.97  | 118.79 |
| 0.16 | 3367.32  | 9160.97  | 21088.60  | 54645.73  | 0.57 | 7.78  | 19.29 | 42.67  | 103.78 |
| 0.17 | 2664.48  | 7147.53  | 16665.20  | 43545.66  | 0.58 | 6.90  | 16.93 | 36.98  | 92.73  |
| 0.18 | 2135.12  | 5766.62  | 13182.23  | 35526.30  | 0.59 | 6.11  | 14.92 | 32.32  | 81.82  |
| 0.19 | 1735.19  | 4663.36  | 10846.88  | 28545.06  | 0.60 | 5.44  | 13.15 | 28.52  | 70.52  |
| 0.20 | 1437.05  | 3860.37  | 8884.53   | 23151.38  | 0.61 | 4.80  | 11.56 | 24.94  | 60.81  |
| 0.21 | 1173.54  | 3160.14  | 7454.46   | 18959.08  | 0.62 | 4.19  | 10.22 | 21.79  | 52.35  |
| 0.22 | 969.59   | 2647.54  | 6198.36   | 15296.16  | 0.63 | 3.73  | 8.95  | 19.01  | 45.62  |
| 0.23 | 812.87   | 2147.05  | 4991.26   | 12603.11  | 0.64 | 3.30  | 7.85  | 16.50  | 39.53  |
| 0.24 | 680.65   | 1802.31  | 4209.04   | 11046.94  | 0.65 | 2.92  | 6.76  | 14.42  | 33.24  |
| 0.25 | 572.90   | 1541.67  | 3486.45   | 8866.23   | 0.66 | 2.57  | 5.87  | 12.29  | 28.06  |
| 0.26 | 482.48   | 1304.66  | 3015.45   | 7552.76   | 0.67 | 2.25  | 5.10  | 10.60  | 24.77  |
| 0.27 | 413.27   | 1117.49  | 2619.30   | 6462.56   | 0.68 | 1.97  | 4.42  | 9.25   | 21.13  |
| 0.28 | 352.18   | 958.72   | 2230.28   | 5652.79   | 0.69 | 1.74  | 3.88  | 7.90   | 18.44  |
| 0.29 | 300.46   | 821.30   | 1899.66   | 4870.81   | 0.70 | 1.53  | 3.39  | 6.78   | 15.78  |
| 0.30 | 261.13   | 705.44   | 1614.68   | 4181.71   | 0.71 | 1.34  | 2.94  | 5.91   | 13.13  |
| 0.31 | 224.06   | 604.81   | 1388.14   | 3535.85   | 0.72 | 1.17  | 2.54  | 5.02   | 11.14  |
| 0.32 | 193.09   | 525.20   | 1200.98   | 3027.08   | 0.73 | 1.01  | 2.21  | 4.29   | 9.59   |
| 0.33 | 165.68   | 449.40   | 1027.32   | 2635.23   | 0.74 | 0.88  | 1.89  | 3.72   | 8.15   |
| 0.34 | 144.14   | 387.90   | 866.86    | 2211.13   | 0.75 | 0.77  | 1.62  | 3.22   | 6.98   |
| 0.35 | 124.21   | 339.30   | 763.20    | 1897.88   | 0.76 | 0.67  | 1.41  | 2.73   | 5.94   |
| 0.36 | 108.25   | 297.99   | 674.34    | 1676.64   | 0.77 | 0.58  | 1.20  | 2.33   | 5.04   |
| 0.37 | 94.86    | 258.33   | 590.42    | 1467.78   | 0.78 | 0.49  | 1.01  | 1.97   | 4.27   |
| 0.38 | 83.29    | 220.22   | 515.56    | 1275.31   | 0.79 | 0.43  | 0.87  | 1.65   | 3.48   |
| 0.39 | 72.75    | 194.21   | 453.57    | 1129.62   | 0.80 | 0.37  | 0.73  | 1.38   | 2.84   |
| 0.40 | 64.88    | 172.21   | 401.69    | 1000.15   | 0.81 | 0.32  | 0.61  | 1.13   | 2.30   |
| 0.41 | 57.23    | 149.73   | 348.91    | 893.05    | 0.82 | 0.27  | 0.51  | 0.92   | 1.90   |
| 0.42 | 50.22    | 132.18   | 307.97    | 771.40    | 0.83 | 0.23  | 0.42  | 0.75   | 1.54   |
| 0.43 | 44.02    | 115.40   | 274.83    | 681.23    | 0.84 | 0.19  | 0.35  | 0.61   | 1.21   |
| 0.44 | 38.91    | 101.18   | 234.98    | 605.03    | 0.85 | 0.16  | 0.29  | 0.49   | 0.97   |
| 0.45 | 34.55    | 89.66    | 206.19    | 516.79    | 0.86 | 0.14  | 0.24  | 0.40   | 0.77   |
| 0.46 | 30.22    | 78.74    | 177.90    | 440.25    | 0.87 | 0.11  | 0.19  | 0.32   | 0.60   |
| 0.47 | 26.56    | 68.61    | 155.65    | 378.78    | 0.88 | 0.09  | 0.16  | 0.25   | 0.46   |
| 0.48 | 23.52    | 60.57    | 139.31    | 331.63    | 0.89 | 0.08  | 0.13  | 0.20   | 0.35   |
| 0.49 | 20.83    | 53.91    | 119.72    | 293.83    | 0.90 | 0.06  | 0.10  | 0.15   | 0.27   |
| 0.50 | 18.14    | 47.83    | 104.78    | 259.14    |      |       |       |        |        |

Table S211: Critical values for detector  $\hat{H}_{mov}^{m,0.1}$  with windows size  $n = 0.1$ , and IM-OLS estimation in a model with intercept. The number of integrated regressors is 2 and the highest power of  $x_{kt}$  is 2.

| m    | 90 %     | 95 %     | 97,5 %   | 99 %      | m    | 90 % | 95 %  | 97,5 % | 99 %  |
|------|----------|----------|----------|-----------|------|------|-------|--------|-------|
| 0.10 | 10151.57 | 25717.10 | 57099.27 | 138421.26 | 0.51 | 8.98 | 20.51 | 41.43  | 92.22 |
| 0.11 | 7303.32  | 18813.61 | 42047.14 | 100140.64 | 0.52 | 7.99 | 17.99 | 36.38  | 79.60 |
| 0.12 | 5374.30  | 13777.86 | 30225.57 | 73620.60  | 0.53 | 6.88 | 15.72 | 31.57  | 68.68 |
| 0.13 | 4010.87  | 10210.51 | 21921.40 | 54507.32  | 0.54 | 6.08 | 13.93 | 27.91  | 59.80 |
| 0.14 | 3169.24  | 7941.20  | 17307.48 | 42289.36  | 0.55 | 5.39 | 12.24 | 24.36  | 52.98 |
| 0.15 | 2471.81  | 6217.22  | 13500.76 | 32838.58  | 0.56 | 4.74 | 10.62 | 21.35  | 46.60 |
| 0.16 | 1905.84  | 4886.68  | 10825.72 | 25728.06  | 0.57 | 4.22 | 9.37  | 18.60  | 40.83 |
| 0.17 | 1507.61  | 3845.51  | 8588.96  | 21225.00  | 0.58 | 3.72 | 8.20  | 16.06  | 34.98 |
| 0.18 | 1221.76  | 3091.88  | 6893.32  | 16706.57  | 0.59 | 3.29 | 7.07  | 14.04  | 30.24 |
| 0.19 | 986.85   | 2478.97  | 5457.85  | 13317.78  | 0.60 | 2.93 | 6.22  | 12.15  | 25.39 |
| 0.20 | 813.40   | 2037.61  | 4416.05  | 11042.64  | 0.61 | 2.58 | 5.45  | 10.83  | 22.67 |
| 0.21 | 665.78   | 1697.29  | 3669.43  | 9033.22   | 0.62 | 2.26 | 4.78  | 9.37   | 20.34 |
| 0.22 | 552.55   | 1401.33  | 3003.31  | 7354.33   | 0.63 | 2.00 | 4.24  | 8.28   | 17.51 |
| 0.23 | 457.92   | 1171.77  | 2491.65  | 5943.80   | 0.64 | 1.76 | 3.70  | 7.12   | 15.48 |
| 0.24 | 388.73   | 979.57   | 2069.22  | 5110.02   | 0.65 | 1.55 | 3.23  | 6.20   | 12.95 |
| 0.25 | 325.72   | 828.02   | 1774.67  | 4218.94   | 0.66 | 1.36 | 2.78  | 5.24   | 10.92 |
| 0.26 | 274.70   | 697.91   | 1523.55  | 3616.64   | 0.67 | 1.18 | 2.40  | 4.45   | 9.42  |
| 0.27 | 234.07   | 596.40   | 1283.73  | 3061.59   | 0.68 | 1.03 | 2.09  | 3.83   | 8.12  |
| 0.28 | 198.29   | 502.54   | 1106.35  | 2634.52   | 0.69 | 0.90 | 1.81  | 3.30   | 7.00  |
| 0.29 | 170.22   | 431.60   | 939.30   | 2215.75   | 0.70 | 0.78 | 1.54  | 2.84   | 5.79  |
| 0.30 | 147.30   | 369.99   | 793.51   | 1887.26   | 0.71 | 0.68 | 1.33  | 2.45   | 5.05  |
| 0.31 | 129.18   | 318.05   | 682.77   | 1638.06   | 0.72 | 0.60 | 1.14  | 2.06   | 4.17  |
| 0.32 | 110.36   | 269.18   | 581.64   | 1383.80   | 0.73 | 0.51 | 0.97  | 1.74   | 3.57  |
| 0.33 | 94.32    | 232.28   | 490.20   | 1120.30   | 0.74 | 0.44 | 0.83  | 1.47   | 2.83  |
| 0.34 | 81.72    | 197.74   | 422.68   | 984.97    | 0.75 | 0.38 | 0.70  | 1.23   | 2.36  |
| 0.35 | 70.19    | 171.22   | 366.74   | 838.91    | 0.76 | 0.33 | 0.59  | 1.03   | 1.99  |
| 0.36 | 61.43    | 149.98   | 318.28   | 725.27    | 0.77 | 0.28 | 0.49  | 0.85   | 1.67  |
| 0.37 | 54.18    | 130.47   | 279.99   | 626.41    | 0.78 | 0.24 | 0.42  | 0.71   | 1.34  |
| 0.38 | 47.01    | 114.59   | 245.35   | 554.12    | 0.79 | 0.21 | 0.35  | 0.59   | 1.10  |
| 0.39 | 41.38    | 99.23    | 211.88   | 487.99    | 0.80 | 0.17 | 0.29  | 0.48   | 0.88  |
| 0.40 | 36.29    | 87.35    | 185.08   | 424.34    | 0.81 | 0.15 | 0.24  | 0.39   | 0.71  |
| 0.41 | 31.69    | 76.15    | 163.43   | 382.00    | 0.82 | 0.13 | 0.20  | 0.32   | 0.57  |
| 0.42 | 27.98    | 66.55    | 139.77   | 322.09    | 0.83 | 0.11 | 0.17  | 0.26   | 0.46  |
| 0.43 | 24.55    | 58.49    | 119.96   | 281.75    | 0.84 | 0.09 | 0.14  | 0.21   | 0.36  |
| 0.44 | 21.78    | 51.31    | 106.09   | 243.42    | 0.85 | 0.08 | 0.12  | 0.17   | 0.28  |
| 0.45 | 19.18    | 44.70    | 91.34    | 212.31    | 0.86 | 0.07 | 0.10  | 0.14   | 0.22  |
| 0.46 | 16.88    | 39.59    | 81.35    | 184.43    | 0.87 | 0.06 | 0.08  | 0.11   | 0.17  |
| 0.47 | 15.00    | 34.84    | 72.09    | 163.71    | 0.88 | 0.05 | 0.07  | 0.09   | 0.14  |
| 0.48 | 13.27    | 30.56    | 63.44    | 143.82    | 0.89 | 0.04 | 0.06  | 0.08   | 0.11  |
| 0.49 | 11.60    | 26.66    | 54.66    | 120.70    | 0.90 | 0.04 | 0.05  | 0.07   | 0.10  |
| 0.50 | 10.13    | 23.34    | 47.13    | 104.38    |      |      |       |        |       |

Table S212: Critical values for detector  $\hat{H}_{mov}^{m,0.2}$  with windows size  $n = 0.2$ , and FM-OLS and D-OLS estimation in a model with intercept. The number of integrated regressors is 2 and the highest power of  $x_{kt}$  is 2.

| m    | 90 %     | 95 %     | 97,5 %    | 99 %      | m    | 90 %  | 95 %  | 97,5 % | 99 %   |
|------|----------|----------|-----------|-----------|------|-------|-------|--------|--------|
| 0.10 | 27631.85 | 75545.39 | 177543.66 | 464623.12 | 0.51 | 23.27 | 59.87 | 130.37 | 317.14 |
| 0.11 | 19874.95 | 54395.72 | 125768.11 | 343634.33 | 0.52 | 20.68 | 51.93 | 113.79 | 277.39 |
| 0.12 | 14673.89 | 40110.33 | 93006.53  | 244742.29 | 0.53 | 18.13 | 44.70 | 100.88 | 241.47 |
| 0.13 | 10951.28 | 29856.51 | 70725.51  | 179403.43 | 0.54 | 15.87 | 39.18 | 87.96  | 210.11 |
| 0.14 | 8316.77  | 22813.42 | 52719.26  | 137603.84 | 0.55 | 13.93 | 34.72 | 76.21  | 179.88 |
| 0.15 | 6518.40  | 17765.52 | 40623.25  | 107270.54 | 0.56 | 12.30 | 30.28 | 65.88  | 160.04 |
| 0.16 | 5164.74  | 14111.31 | 32785.82  | 84771.79  | 0.57 | 10.84 | 26.61 | 58.48  | 138.20 |
| 0.17 | 4072.26  | 10952.46 | 25660.00  | 67350.80  | 0.58 | 9.59  | 23.37 | 50.12  | 123.06 |
| 0.18 | 3264.23  | 8867.75  | 20517.35  | 55204.80  | 0.59 | 8.44  | 20.37 | 43.61  | 108.84 |
| 0.19 | 2636.81  | 7154.96  | 16530.61  | 44613.72  | 0.60 | 7.47  | 17.71 | 37.93  | 93.46  |
| 0.20 | 2187.25  | 5941.28  | 13646.09  | 35797.37  | 0.61 | 6.53  | 15.49 | 32.86  | 80.19  |
| 0.21 | 1787.54  | 4871.62  | 11529.33  | 29367.21  | 0.62 | 5.70  | 13.55 | 28.81  | 68.48  |
| 0.22 | 1472.78  | 4066.74  | 9584.32   | 23677.52  | 0.63 | 5.00  | 11.81 | 25.08  | 59.25  |
| 0.23 | 1246.74  | 3272.56  | 7645.98   | 19385.44  | 0.64 | 4.42  | 10.24 | 21.67  | 50.08  |
| 0.24 | 1036.73  | 2757.56  | 6387.81   | 16923.81  | 0.65 | 3.87  | 8.82  | 18.57  | 42.18  |
| 0.25 | 867.98   | 2346.88  | 5332.34   | 13605.79  | 0.66 | 3.40  | 7.59  | 15.85  | 35.75  |
| 0.26 | 731.46   | 1983.52  | 4613.89   | 11583.90  | 0.67 | 2.94  | 6.58  | 13.52  | 30.56  |
| 0.27 | 622.76   | 1699.89  | 3968.34   | 9841.58   | 0.68 | 2.57  | 5.65  | 11.58  | 26.44  |
| 0.28 | 531.27   | 1453.89  | 3390.56   | 8451.81   | 0.69 | 2.25  | 4.90  | 9.86   | 22.71  |
| 0.29 | 454.77   | 1240.68  | 2886.06   | 7332.45   | 0.70 | 1.97  | 4.24  | 8.31   | 19.56  |
| 0.30 | 392.81   | 1058.50  | 2451.08   | 6287.56   | 0.71 | 1.71  | 3.65  | 7.27   | 15.77  |
| 0.31 | 336.24   | 912.22   | 2103.86   | 5332.80   | 0.72 | 1.48  | 3.14  | 6.17   | 13.40  |
| 0.32 | 289.97   | 787.66   | 1818.45   | 4543.35   | 0.73 | 1.28  | 2.68  | 5.16   | 11.30  |
| 0.33 | 248.23   | 669.09   | 1528.86   | 3944.49   | 0.74 | 1.09  | 2.28  | 4.46   | 9.47   |
| 0.34 | 215.14   | 576.51   | 1292.41   | 3356.07   | 0.75 | 0.94  | 1.94  | 3.78   | 8.10   |
| 0.35 | 185.11   | 506.88   | 1128.22   | 2786.25   | 0.76 | 0.81  | 1.67  | 3.17   | 6.78   |
| 0.36 | 161.64   | 443.12   | 1001.30   | 2503.74   | 0.77 | 0.70  | 1.41  | 2.67   | 5.68   |
| 0.37 | 141.18   | 380.65   | 866.07    | 2186.16   | 0.78 | 0.59  | 1.18  | 2.23   | 4.75   |
| 0.38 | 123.59   | 326.54   | 761.84    | 1895.42   | 0.79 | 0.50  | 1.00  | 1.85   | 3.84   |
| 0.39 | 107.63   | 285.54   | 669.35    | 1654.36   | 0.80 | 0.43  | 0.82  | 1.54   | 3.09   |
| 0.40 | 95.69    | 252.35   | 588.80    | 1456.77   | 0.81 | 0.36  | 0.68  | 1.25   | 2.49   |
| 0.41 | 84.10    | 219.69   | 507.83    | 1300.29   | 0.82 | 0.30  | 0.56  | 1.00   | 2.04   |
| 0.42 | 74.23    | 194.47   | 449.59    | 1108.95   | 0.83 | 0.26  | 0.46  | 0.81   | 1.63   |
| 0.43 | 64.62    | 167.68   | 395.19    | 985.51    | 0.84 | 0.21  | 0.38  | 0.65   | 1.28   |
| 0.44 | 56.87    | 147.20   | 341.09    | 881.93    | 0.85 | 0.18  | 0.31  | 0.52   | 1.01   |
| 0.45 | 50.03    | 129.20   | 291.94    | 744.95    | 0.86 | 0.15  | 0.25  | 0.41   | 0.79   |
| 0.46 | 43.70    | 112.89   | 256.09    | 632.05    | 0.87 | 0.12  | 0.20  | 0.33   | 0.62   |
| 0.47 | 38.30    | 99.31    | 222.89    | 532.82    | 0.88 | 0.10  | 0.16  | 0.26   | 0.47   |
| 0.48 | 33.69    | 87.04    | 196.22    | 471.05    | 0.89 | 0.08  | 0.13  | 0.20   | 0.36   |
| 0.49 | 29.91    | 76.36    | 169.22    | 417.91    | 0.90 | 0.06  | 0.10  | 0.16   | 0.27   |
| 0.50 | 26.10    | 67.59    | 146.98    | 362.37    |      |       |       |        |        |

Table S213: Critical values for detector  $\hat{H}_{mov}^{m,0.2}$  with windows size  $n = 0.2$ , and IM-OLS estimation in a model with intercept. The number of integrated regressors is 2 and the highest power of  $x_{kt}$  is 2.

| m    | 90 %     | 95 %     | 97,5 %   | 99 %      | m    | 90 % | 95 %  | 97,5 % | 99 %  |
|------|----------|----------|----------|-----------|------|------|-------|--------|-------|
| 0.10 | 11897.34 | 30256.38 | 67870.97 | 165158.04 | 0.51 | 9.96 | 22.52 | 45.53  | 99.97 |
| 0.11 | 8653.05  | 22291.32 | 49881.48 | 119160.13 | 0.52 | 8.83 | 19.64 | 39.46  | 85.81 |
| 0.12 | 6341.74  | 16254.44 | 35976.92 | 88351.57  | 0.53 | 7.58 | 17.13 | 34.25  | 74.28 |
| 0.13 | 4740.67  | 12121.22 | 26136.33 | 64382.37  | 0.54 | 6.66 | 15.17 | 30.06  | 64.62 |
| 0.14 | 3716.82  | 9376.27  | 20539.55 | 50061.03  | 0.55 | 5.90 | 13.25 | 26.14  | 56.53 |
| 0.15 | 2903.81  | 7300.59  | 15965.91 | 38468.16  | 0.56 | 5.15 | 11.44 | 22.87  | 49.56 |
| 0.16 | 2237.92  | 5788.10  | 12677.73 | 30735.52  | 0.57 | 4.58 | 10.10 | 19.94  | 43.42 |
| 0.17 | 1769.38  | 4527.92  | 10157.88 | 25070.25  | 0.58 | 4.02 | 8.80  | 16.98  | 36.70 |
| 0.18 | 1430.30  | 3619.82  | 8130.15  | 19831.80  | 0.59 | 3.55 | 7.56  | 14.86  | 31.70 |
| 0.19 | 1159.64  | 2915.31  | 6433.59  | 15634.48  | 0.60 | 3.13 | 6.64  | 12.82  | 26.57 |
| 0.20 | 950.54   | 2393.18  | 5213.67  | 12958.32  | 0.61 | 2.75 | 5.78  | 11.37  | 23.65 |
| 0.21 | 782.34   | 1979.76  | 4315.42  | 10593.79  | 0.62 | 2.40 | 5.05  | 9.84   | 21.04 |
| 0.22 | 649.27   | 1640.85  | 3533.26  | 8603.23   | 0.63 | 2.12 | 4.44  | 8.65   | 18.20 |
| 0.23 | 538.55   | 1374.93  | 2912.25  | 6982.08   | 0.64 | 1.86 | 3.87  | 7.38   | 16.00 |
| 0.24 | 450.69   | 1145.32  | 2424.31  | 5953.25   | 0.65 | 1.63 | 3.37  | 6.42   | 13.31 |
| 0.25 | 379.26   | 965.59   | 2067.64  | 4935.86   | 0.66 | 1.42 | 2.88  | 5.41   | 11.24 |
| 0.26 | 320.95   | 811.59   | 1771.81  | 4179.97   | 0.67 | 1.23 | 2.48  | 4.56   | 9.65  |
| 0.27 | 272.32   | 694.17   | 1494.43  | 3559.77   | 0.68 | 1.07 | 2.15  | 3.92   | 8.21  |
| 0.28 | 229.68   | 582.77   | 1279.84  | 3090.41   | 0.69 | 0.93 | 1.86  | 3.37   | 7.12  |
| 0.29 | 197.70   | 502.26   | 1091.52  | 2557.72   | 0.70 | 0.81 | 1.57  | 2.89   | 5.86  |
| 0.30 | 169.84   | 427.08   | 918.24   | 2199.64   | 0.71 | 0.70 | 1.35  | 2.48   | 5.10  |
| 0.31 | 149.09   | 364.90   | 788.47   | 1887.25   | 0.72 | 0.61 | 1.15  | 2.08   | 4.21  |
| 0.32 | 127.70   | 311.38   | 668.11   | 1583.72   | 0.73 | 0.52 | 0.98  | 1.75   | 3.59  |
| 0.33 | 109.08   | 266.68   | 560.20   | 1286.63   | 0.74 | 0.45 | 0.84  | 1.47   | 2.84  |
| 0.34 | 94.06    | 227.07   | 483.79   | 1120.07   | 0.75 | 0.39 | 0.70  | 1.23   | 2.36  |
| 0.35 | 80.85    | 195.89   | 413.17   | 959.45    | 0.76 | 0.33 | 0.59  | 1.03   | 2.00  |
| 0.36 | 70.50    | 172.15   | 360.30   | 823.98    | 0.77 | 0.29 | 0.50  | 0.85   | 1.68  |
| 0.37 | 62.26    | 148.34   | 319.55   | 715.49    | 0.78 | 0.25 | 0.43  | 0.71   | 1.35  |
| 0.38 | 53.70    | 130.64   | 278.23   | 625.93    | 0.79 | 0.22 | 0.36  | 0.59   | 1.10  |
| 0.39 | 47.23    | 112.74   | 238.49   | 547.76    | 0.80 | 0.19 | 0.30  | 0.48   | 0.89  |
| 0.40 | 41.36    | 99.10    | 207.59   | 481.46    | 0.81 | 0.16 | 0.25  | 0.40   | 0.71  |
| 0.41 | 35.91    | 86.09    | 182.95   | 432.40    | 0.82 | 0.14 | 0.22  | 0.33   | 0.57  |
| 0.42 | 31.78    | 74.80    | 156.14   | 362.61    | 0.83 | 0.13 | 0.19  | 0.28   | 0.46  |
| 0.43 | 27.77    | 65.44    | 134.81   | 313.85    | 0.84 | 0.11 | 0.16  | 0.23   | 0.37  |
| 0.44 | 24.72    | 57.45    | 117.19   | 272.84    | 0.85 | 0.10 | 0.14  | 0.19   | 0.30  |
| 0.45 | 21.58    | 50.03    | 102.93   | 234.01    | 0.86 | 0.09 | 0.12  | 0.17   | 0.25  |
| 0.46 | 18.96    | 44.08    | 89.86    | 206.29    | 0.87 | 0.08 | 0.11  | 0.15   | 0.21  |
| 0.47 | 16.81    | 38.62    | 79.70    | 181.29    | 0.88 | 0.07 | 0.10  | 0.13   | 0.18  |
| 0.48 | 14.80    | 33.85    | 69.79    | 157.31    | 0.89 | 0.06 | 0.09  | 0.12   | 0.16  |
| 0.49 | 12.91    | 29.53    | 59.58    | 131.96    | 0.90 | 0.06 | 0.08  | 0.11   | 0.15  |
| 0.50 | 11.34    | 25.78    | 51.73    | 113.13    |      |      |       |        |       |

Table S214: Critical values for detector  $\hat{H}_{mov}^{m,0.3}$  with windows size  $n = 0.3$ , and FM-OLS and D-OLS estimation in a model with intercept. The number of integrated regressors is 2 and the highest power of  $x_{kt}$  is 2.

| m    | 90 %     | 95 %     | 97,5 %    | 99 %      | m    | 90 %  | 95 %  | 97,5 % | 99 %   |
|------|----------|----------|-----------|-----------|------|-------|-------|--------|--------|
| 0.10 | 32491.82 | 89225.94 | 210994.20 | 554593.19 | 0.51 | 25.73 | 65.77 | 142.44 | 342.95 |
| 0.11 | 23419.90 | 64597.57 | 149208.12 | 407839.69 | 0.52 | 22.75 | 57.13 | 123.66 | 300.37 |
| 0.12 | 17259.99 | 47507.93 | 110010.17 | 287757.81 | 0.53 | 19.99 | 48.79 | 109.30 | 260.16 |
| 0.13 | 12875.75 | 35245.84 | 82858.90  | 211334.66 | 0.54 | 17.40 | 42.63 | 94.47  | 224.77 |
| 0.14 | 9818.69  | 26963.60 | 61933.88  | 162816.14 | 0.55 | 15.21 | 37.50 | 82.39  | 193.66 |
| 0.15 | 7634.22  | 20866.03 | 48242.69  | 126555.98 | 0.56 | 13.43 | 32.76 | 70.83  | 169.71 |
| 0.16 | 6051.94  | 16508.57 | 38916.20  | 100252.16 | 0.57 | 11.80 | 28.84 | 62.45  | 146.71 |
| 0.17 | 4773.44  | 12981.83 | 30431.19  | 79481.01  | 0.58 | 10.39 | 24.96 | 53.71  | 129.29 |
| 0.18 | 3812.93  | 10455.50 | 24194.82  | 65120.53  | 0.59 | 9.11  | 21.79 | 46.47  | 113.61 |
| 0.19 | 3078.00  | 8454.45  | 19247.06  | 52685.42  | 0.60 | 8.03  | 18.88 | 39.93  | 98.23  |
| 0.20 | 2553.43  | 6949.43  | 16044.70  | 42498.03  | 0.61 | 6.96  | 16.38 | 34.58  | 83.77  |
| 0.21 | 2093.16  | 5731.92  | 13466.64  | 34446.65  | 0.62 | 6.08  | 14.19 | 30.16  | 71.01  |
| 0.22 | 1710.36  | 4757.16  | 11131.47  | 27245.80  | 0.63 | 5.32  | 12.40 | 26.22  | 61.41  |
| 0.23 | 1449.63  | 3830.23  | 8974.70   | 22803.78  | 0.64 | 4.66  | 10.73 | 22.67  | 51.67  |
| 0.24 | 1205.47  | 3204.80  | 7395.65   | 19672.22  | 0.65 | 4.08  | 9.16  | 19.19  | 43.42  |
| 0.25 | 1009.26  | 2735.13  | 6209.86   | 16013.28  | 0.66 | 3.56  | 7.88  | 16.36  | 36.60  |
| 0.26 | 851.28   | 2300.67  | 5367.74   | 13446.24  | 0.67 | 3.07  | 6.81  | 13.82  | 31.43  |
| 0.27 | 724.31   | 1966.82  | 4569.66   | 11489.87  | 0.68 | 2.68  | 5.84  | 11.85  | 26.99  |
| 0.28 | 617.65   | 1685.45  | 3928.01   | 9786.10   | 0.69 | 2.33  | 5.04  | 10.08  | 23.03  |
| 0.29 | 528.47   | 1440.11  | 3339.22   | 8484.28   | 0.70 | 2.04  | 4.34  | 8.51   | 19.89  |
| 0.30 | 455.56   | 1225.13  | 2822.08   | 7295.60   | 0.71 | 1.75  | 3.73  | 7.37   | 15.94  |
| 0.31 | 387.50   | 1057.29  | 2438.73   | 6093.26   | 0.72 | 1.51  | 3.19  | 6.26   | 13.58  |
| 0.32 | 334.84   | 903.88   | 2098.86   | 5193.17   | 0.73 | 1.30  | 2.71  | 5.22   | 11.33  |
| 0.33 | 285.75   | 768.79   | 1750.50   | 4512.10   | 0.74 | 1.11  | 2.31  | 4.49   | 9.54   |
| 0.34 | 248.28   | 656.21   | 1487.95   | 3838.62   | 0.75 | 0.95  | 1.96  | 3.81   | 8.13   |
| 0.35 | 214.12   | 579.30   | 1284.79   | 3179.18   | 0.76 | 0.82  | 1.68  | 3.18   | 6.80   |
| 0.36 | 184.20   | 509.06   | 1137.00   | 2802.63   | 0.77 | 0.70  | 1.42  | 2.68   | 5.69   |
| 0.37 | 161.08   | 433.92   | 986.47    | 2513.48   | 0.78 | 0.59  | 1.19  | 2.24   | 4.75   |
| 0.38 | 140.59   | 370.77   | 860.79    | 2158.45   | 0.79 | 0.51  | 1.00  | 1.86   | 3.84   |
| 0.39 | 123.02   | 323.63   | 757.15    | 1882.96   | 0.80 | 0.43  | 0.83  | 1.54   | 3.09   |
| 0.40 | 108.61   | 285.06   | 666.84    | 1624.84   | 0.81 | 0.36  | 0.69  | 1.25   | 2.49   |
| 0.41 | 95.60    | 246.45   | 570.26    | 1463.30   | 0.82 | 0.31  | 0.56  | 1.00   | 2.05   |
| 0.42 | 83.98    | 218.98   | 501.19    | 1225.77   | 0.83 | 0.26  | 0.46  | 0.81   | 1.63   |
| 0.43 | 73.18    | 188.91   | 440.45    | 1090.15   | 0.84 | 0.21  | 0.38  | 0.65   | 1.28   |
| 0.44 | 63.77    | 164.72   | 377.21    | 986.64    | 0.85 | 0.18  | 0.31  | 0.52   | 1.02   |
| 0.45 | 56.06    | 144.28   | 327.03    | 823.89    | 0.86 | 0.15  | 0.25  | 0.42   | 0.79   |
| 0.46 | 49.00    | 125.40   | 282.71    | 697.66    | 0.87 | 0.12  | 0.21  | 0.33   | 0.62   |
| 0.47 | 42.62    | 110.44   | 244.61    | 589.39    | 0.88 | 0.10  | 0.17  | 0.26   | 0.47   |
| 0.48 | 37.55    | 96.45    | 214.10    | 519.23    | 0.89 | 0.08  | 0.13  | 0.20   | 0.36   |
| 0.49 | 33.26    | 84.22    | 186.74    | 460.59    | 0.90 | 0.07  | 0.11  | 0.16   | 0.27   |
| 0.50 | 29.10    | 74.65    | 162.41    | 397.52    |      |       |       |        |        |

Table S215: Critical values for detector  $\hat{H}_{mov}^{m,0.3}$  with windows size  $n = 0.3$ , and IM-OLS estimation in a model with intercept. The number of integrated regressors is 2 and the highest power of  $x_{kt}$  is 2.



| m    | 90 %     | 95 %     | 97,5 %   | 99 %      | m    | 90 %  | 95 %  | 97,5 % | 99 %  |
|------|----------|----------|----------|-----------|------|-------|-------|--------|-------|
| 0.10 | 17431.44 | 37157.19 | 73205.27 | 163511.72 | 0.51 | 10.53 | 20.23 | 36.64  | 74.44 |
| 0.11 | 12129.79 | 25868.54 | 51083.13 | 114210.72 | 0.52 | 9.35  | 17.65 | 32.07  | 65.02 |
| 0.12 | 8614.37  | 18295.16 | 36919.18 | 80575.13  | 0.53 | 8.21  | 15.41 | 28.01  | 56.40 |
| 0.13 | 6325.77  | 13202.87 | 25650.02 | 56646.24  | 0.54 | 7.34  | 13.60 | 24.54  | 50.54 |
| 0.14 | 4768.05  | 9760.66  | 19557.95 | 43680.79  | 0.55 | 6.42  | 11.99 | 21.72  | 44.30 |
| 0.15 | 3618.14  | 7413.17  | 14818.06 | 32967.21  | 0.56 | 5.66  | 10.59 | 18.77  | 38.73 |
| 0.16 | 2773.56  | 5707.29  | 11227.16 | 25931.38  | 0.57 | 5.05  | 9.35  | 16.57  | 33.84 |
| 0.17 | 2155.95  | 4458.48  | 8849.91  | 20281.97  | 0.58 | 4.45  | 8.28  | 14.36  | 29.69 |
| 0.18 | 1709.61  | 3529.85  | 6894.20  | 15774.09  | 0.59 | 3.92  | 7.26  | 12.70  | 26.03 |
| 0.19 | 1354.99  | 2782.30  | 5378.40  | 12329.27  | 0.60 | 3.48  | 6.35  | 11.16  | 22.27 |
| 0.20 | 1088.01  | 2244.49  | 4399.42  | 9865.06   | 0.61 | 3.08  | 5.66  | 9.79   | 19.81 |
| 0.21 | 889.17   | 1818.31  | 3501.29  | 7969.43   | 0.62 | 2.71  | 4.96  | 8.68   | 17.50 |
| 0.22 | 727.00   | 1480.82  | 2853.78  | 6351.94   | 0.63 | 2.41  | 4.40  | 7.64   | 15.36 |
| 0.23 | 601.25   | 1228.87  | 2379.66  | 5186.76   | 0.64 | 2.13  | 3.82  | 6.68   | 13.37 |
| 0.24 | 499.72   | 1016.34  | 1933.51  | 4239.57   | 0.65 | 1.88  | 3.36  | 5.79   | 11.49 |
| 0.25 | 414.39   | 847.08   | 1640.60  | 3537.31   | 0.66 | 1.64  | 2.91  | 5.01   | 9.60  |
| 0.26 | 345.68   | 708.64   | 1384.44  | 2977.47   | 0.67 | 1.43  | 2.58  | 4.37   | 8.54  |
| 0.27 | 291.55   | 606.25   | 1161.19  | 2538.58   | 0.68 | 1.26  | 2.24  | 3.80   | 7.40  |
| 0.28 | 248.54   | 513.26   | 998.63   | 2176.78   | 0.69 | 1.11  | 1.95  | 3.33   | 6.50  |
| 0.29 | 213.39   | 429.85   | 834.74   | 1783.60   | 0.70 | 0.96  | 1.69  | 2.88   | 5.42  |
| 0.30 | 181.11   | 368.36   | 716.23   | 1504.12   | 0.71 | 0.85  | 1.46  | 2.46   | 4.71  |
| 0.31 | 156.13   | 313.43   | 600.11   | 1298.53   | 0.72 | 0.74  | 1.28  | 2.11   | 3.95  |
| 0.32 | 134.33   | 268.84   | 506.65   | 1107.65   | 0.73 | 0.64  | 1.09  | 1.81   | 3.46  |
| 0.33 | 114.72   | 229.20   | 425.99   | 925.31    | 0.74 | 0.55  | 0.94  | 1.53   | 2.83  |
| 0.34 | 99.83    | 195.61   | 367.01   | 794.51    | 0.75 | 0.47  | 0.80  | 1.29   | 2.39  |
| 0.35 | 85.78    | 168.86   | 320.92   | 671.20    | 0.76 | 0.41  | 0.69  | 1.11   | 2.02  |
| 0.36 | 74.27    | 148.38   | 279.36   | 575.69    | 0.77 | 0.35  | 0.58  | 0.94   | 1.70  |
| 0.37 | 64.74    | 127.94   | 248.25   | 502.78    | 0.78 | 0.30  | 0.50  | 0.79   | 1.40  |
| 0.38 | 56.26    | 112.26   | 212.41   | 439.74    | 0.79 | 0.26  | 0.42  | 0.66   | 1.16  |
| 0.39 | 49.10    | 96.48    | 182.64   | 380.86    | 0.80 | 0.22  | 0.35  | 0.54   | 0.95  |
| 0.40 | 43.02    | 84.18    | 158.92   | 333.48    | 0.81 | 0.18  | 0.30  | 0.45   | 0.76  |
| 0.41 | 37.50    | 74.23    | 137.80   | 300.30    | 0.82 | 0.15  | 0.25  | 0.37   | 0.61  |
| 0.42 | 33.13    | 64.73    | 118.90   | 258.76    | 0.83 | 0.13  | 0.21  | 0.31   | 0.50  |
| 0.43 | 29.12    | 57.66    | 106.01   | 228.72    | 0.84 | 0.11  | 0.17  | 0.25   | 0.40  |
| 0.44 | 25.79    | 49.84    | 91.58    | 197.34    | 0.85 | 0.09  | 0.14  | 0.20   | 0.32  |
| 0.45 | 22.66    | 43.53    | 79.21    | 172.47    | 0.86 | 0.07  | 0.11  | 0.16   | 0.25  |
| 0.46 | 19.81    | 38.08    | 69.76    | 148.94    | 0.87 | 0.06  | 0.09  | 0.13   | 0.19  |
| 0.47 | 17.34    | 33.86    | 62.02    | 133.48    | 0.88 | 0.05  | 0.07  | 0.10   | 0.15  |
| 0.48 | 15.34    | 29.67    | 54.53    | 116.40    | 0.89 | 0.04  | 0.05  | 0.07   | 0.11  |
| 0.49 | 13.57    | 25.92    | 47.03    | 99.75     | 0.90 | 0.03  | 0.04  | 0.06   | 0.08  |
| 0.50 | 12.04    | 22.72    | 41.32    | 86.97     |      |       |       |        |       |

Table S216: Critical values for detector  $\hat{H}_{mov}^{m,0.1}$  with windows size  $n = 0.1$ , and FM-OLS and D-OLS estimation in a model with intercept and linear trend. The number of integrated regressors is 2 and the highest power of  $x_{kt}$  is 2.

| m    | 90 %     | 95 %     | 97,5 %    | 99 %      | m    | 90 %  | 95 %  | 97,5 % | 99 %   |
|------|----------|----------|-----------|-----------|------|-------|-------|--------|--------|
| 0.10 | 41752.98 | 95465.95 | 199499.94 | 459356.01 | 0.51 | 23.94 | 49.97 | 96.86  | 213.70 |
| 0.11 | 28813.66 | 65156.08 | 135621.94 | 322244.21 | 0.52 | 21.21 | 43.73 | 85.48  | 189.23 |
| 0.12 | 20419.18 | 46659.90 | 96933.67  | 231123.81 | 0.53 | 18.69 | 38.14 | 76.67  | 169.14 |
| 0.13 | 14907.86 | 33378.15 | 69406.46  | 164884.71 | 0.54 | 16.37 | 33.74 | 66.18  | 147.26 |
| 0.14 | 10986.56 | 24661.98 | 51840.96  | 121392.95 | 0.55 | 14.44 | 29.53 | 57.90  | 129.31 |
| 0.15 | 8425.32  | 19187.16 | 39491.19  | 94308.70  | 0.56 | 12.77 | 25.59 | 50.08  | 112.47 |
| 0.16 | 6444.31  | 14684.44 | 30638.90  | 71356.10  | 0.57 | 11.22 | 22.63 | 44.06  | 100.06 |
| 0.17 | 5040.95  | 11292.68 | 24110.32  | 57913.25  | 0.58 | 9.83  | 20.02 | 38.45  | 86.95  |
| 0.18 | 3966.00  | 8835.93  | 18684.28  | 45312.49  | 0.59 | 8.69  | 17.57 | 33.08  | 76.15  |
| 0.19 | 3194.24  | 7072.46  | 14582.92  | 35967.59  | 0.60 | 7.71  | 15.51 | 29.11  | 65.90  |
| 0.20 | 2601.46  | 5739.23  | 11939.05  | 29061.70  | 0.61 | 6.81  | 13.73 | 25.88  | 57.21  |
| 0.21 | 2098.14  | 4685.37  | 9685.03   | 23749.82  | 0.62 | 6.02  | 12.01 | 22.37  | 49.61  |
| 0.22 | 1706.78  | 3805.00  | 7869.95   | 18597.61  | 0.63 | 5.31  | 10.51 | 19.84  | 44.33  |
| 0.23 | 1404.10  | 3124.36  | 6425.58   | 14572.45  | 0.64 | 4.67  | 9.16  | 17.25  | 38.84  |
| 0.24 | 1166.70  | 2546.06  | 5362.29   | 12377.88  | 0.65 | 4.14  | 7.93  | 15.02  | 33.31  |
| 0.25 | 970.81   | 2140.11  | 4409.06   | 10051.21  | 0.66 | 3.61  | 7.02  | 13.05  | 28.38  |
| 0.26 | 817.89   | 1806.84  | 3731.99   | 8561.22   | 0.67 | 3.16  | 6.10  | 11.23  | 24.32  |
| 0.27 | 684.80   | 1537.92  | 3119.25   | 7275.89   | 0.68 | 2.75  | 5.26  | 9.68   | 20.78  |
| 0.28 | 577.07   | 1278.48  | 2631.06   | 6181.81   | 0.69 | 2.41  | 4.58  | 8.34   | 17.87  |
| 0.29 | 487.36   | 1075.56  | 2202.80   | 5161.44   | 0.70 | 2.11  | 3.96  | 7.26   | 14.99  |
| 0.30 | 419.06   | 911.06   | 1838.64   | 4261.26   | 0.71 | 1.84  | 3.44  | 6.29   | 12.74  |
| 0.31 | 356.44   | 777.05   | 1572.94   | 3617.82   | 0.72 | 1.60  | 2.98  | 5.41   | 11.04  |
| 0.32 | 305.60   | 657.70   | 1336.81   | 3187.83   | 0.73 | 1.39  | 2.59  | 4.73   | 9.52   |
| 0.33 | 263.32   | 564.15   | 1160.60   | 2685.27   | 0.74 | 1.21  | 2.24  | 4.09   | 8.02   |
| 0.34 | 227.12   | 485.72   | 1003.80   | 2318.90   | 0.75 | 1.04  | 1.92  | 3.43   | 6.98   |
| 0.35 | 195.38   | 425.82   | 871.38    | 2011.90   | 0.76 | 0.90  | 1.65  | 2.91   | 5.85   |
| 0.36 | 168.24   | 371.26   | 763.57    | 1741.68   | 0.77 | 0.77  | 1.40  | 2.44   | 4.95   |
| 0.37 | 146.88   | 318.31   | 656.57    | 1541.33   | 0.78 | 0.66  | 1.19  | 2.05   | 4.13   |
| 0.38 | 128.44   | 276.56   | 570.94    | 1290.08   | 0.79 | 0.56  | 1.00  | 1.72   | 3.38   |
| 0.39 | 112.46   | 238.39   | 503.82    | 1155.89   | 0.80 | 0.48  | 0.84  | 1.44   | 2.72   |
| 0.40 | 98.88    | 209.11   | 436.62    | 1016.66   | 0.81 | 0.40  | 0.70  | 1.18   | 2.21   |
| 0.41 | 86.28    | 184.23   | 378.99    | 889.33    | 0.82 | 0.34  | 0.59  | 0.95   | 1.79   |
| 0.42 | 75.87    | 159.48   | 325.20    | 757.01    | 0.83 | 0.29  | 0.49  | 0.79   | 1.44   |
| 0.43 | 65.99    | 138.33   | 285.58    | 653.78    | 0.84 | 0.24  | 0.40  | 0.65   | 1.18   |
| 0.44 | 58.02    | 122.84   | 248.23    | 563.62    | 0.85 | 0.20  | 0.33  | 0.52   | 0.93   |
| 0.45 | 51.56    | 107.43   | 216.67    | 488.74    | 0.86 | 0.16  | 0.27  | 0.42   | 0.73   |
| 0.46 | 44.98    | 95.08    | 187.18    | 429.42    | 0.87 | 0.13  | 0.22  | 0.33   | 0.58   |
| 0.47 | 39.64    | 83.69    | 163.65    | 367.98    | 0.88 | 0.11  | 0.17  | 0.26   | 0.45   |
| 0.48 | 34.79    | 73.39    | 143.98    | 325.63    | 0.89 | 0.09  | 0.14  | 0.20   | 0.34   |
| 0.49 | 30.75    | 64.60    | 126.05    | 284.38    | 0.90 | 0.07  | 0.11  | 0.16   | 0.25   |
| 0.50 | 27.11    | 56.95    | 110.23    | 251.32    |      |       |       |        |        |

Table S217: Critical values for detector  $\hat{H}_{mov}^{m,0.1}$  with windows size  $n = 0.1$ , and IM-OLS estimation in a model with intercept and linear trend. The number of integrated regressors is 2 and the highest power of  $x_{kt}$  is 2.

| m    | 90 %     | 95 %     | 97,5 %   | 99 %      | m    | 90 %  | 95 %  | 97,5 % | 99 %   |
|------|----------|----------|----------|-----------|------|-------|-------|--------|--------|
| 0.10 | 23210.86 | 49512.97 | 98051.40 | 215596.22 | 0.51 | 14.82 | 28.14 | 50.95  | 102.33 |
| 0.11 | 16309.60 | 34689.95 | 68837.10 | 153618.12 | 0.52 | 13.11 | 24.53 | 44.51  | 88.80  |
| 0.12 | 11652.86 | 24596.35 | 49958.24 | 109618.33 | 0.53 | 11.43 | 21.39 | 38.59  | 76.58  |
| 0.13 | 8578.15  | 17868.86 | 34631.48 | 78314.22  | 0.54 | 10.16 | 18.81 | 33.72  | 68.67  |
| 0.14 | 6522.73  | 13458.85 | 26835.93 | 60322.46  | 0.55 | 8.86  | 16.44 | 29.58  | 59.85  |
| 0.15 | 4995.86  | 10195.44 | 20521.67 | 45257.32  | 0.56 | 7.81  | 14.36 | 25.67  | 52.58  |
| 0.16 | 3860.82  | 7966.20  | 15640.45 | 36142.91  | 0.57 | 6.93  | 12.77 | 22.36  | 45.06  |
| 0.17 | 3016.64  | 6248.01  | 12359.78 | 28501.27  | 0.58 | 6.06  | 11.22 | 19.31  | 39.65  |
| 0.18 | 2410.41  | 4932.15  | 9706.00  | 22453.09  | 0.59 | 5.30  | 9.78  | 17.00  | 34.28  |
| 0.19 | 1921.41  | 3903.13  | 7602.71  | 17495.30  | 0.60 | 4.70  | 8.48  | 14.86  | 29.27  |
| 0.20 | 1547.68  | 3179.75  | 6231.94  | 14079.44  | 0.61 | 4.14  | 7.55  | 12.96  | 25.78  |
| 0.21 | 1271.91  | 2555.83  | 5041.78  | 11462.08  | 0.62 | 3.63  | 6.55  | 11.36  | 22.61  |
| 0.22 | 1039.37  | 2101.19  | 4078.72  | 9221.27   | 0.63 | 3.20  | 5.76  | 9.99   | 19.94  |
| 0.23 | 862.81   | 1759.99  | 3385.84  | 7420.46   | 0.64 | 2.81  | 4.99  | 8.71   | 16.92  |
| 0.24 | 718.88   | 1465.23  | 2770.63  | 6141.11   | 0.65 | 2.46  | 4.34  | 7.48   | 14.43  |
| 0.25 | 598.16   | 1213.09  | 2336.51  | 5080.15   | 0.66 | 2.14  | 3.74  | 6.37   | 12.11  |
| 0.26 | 501.68   | 1022.35  | 2000.14  | 4303.78   | 0.67 | 1.86  | 3.30  | 5.49   | 10.68  |
| 0.27 | 423.35   | 878.67   | 1676.74  | 3682.67   | 0.68 | 1.63  | 2.85  | 4.74   | 9.14   |
| 0.28 | 359.23   | 741.24   | 1442.03  | 3100.08   | 0.69 | 1.41  | 2.46  | 4.11   | 8.02   |
| 0.29 | 309.22   | 622.41   | 1203.02  | 2590.47   | 0.70 | 1.22  | 2.10  | 3.53   | 6.56   |
| 0.30 | 262.40   | 533.68   | 1027.22  | 2191.57   | 0.71 | 1.06  | 1.81  | 3.00   | 5.67   |
| 0.31 | 226.98   | 452.86   | 856.72   | 1871.41   | 0.72 | 0.91  | 1.56  | 2.56   | 4.62   |
| 0.32 | 194.76   | 387.07   | 727.02   | 1606.27   | 0.73 | 0.78  | 1.33  | 2.17   | 4.05   |
| 0.33 | 166.27   | 328.53   | 619.65   | 1324.74   | 0.74 | 0.67  | 1.13  | 1.81   | 3.30   |
| 0.34 | 144.60   | 284.23   | 527.42   | 1125.40   | 0.75 | 0.57  | 0.95  | 1.51   | 2.73   |
| 0.35 | 124.38   | 246.69   | 459.29   | 967.95    | 0.76 | 0.48  | 0.80  | 1.28   | 2.29   |
| 0.36 | 107.76   | 213.32   | 400.56   | 833.19    | 0.77 | 0.41  | 0.67  | 1.08   | 1.92   |
| 0.37 | 93.37    | 184.44   | 354.87   | 729.75    | 0.78 | 0.35  | 0.57  | 0.89   | 1.54   |
| 0.38 | 81.46    | 162.10   | 307.21   | 633.80    | 0.79 | 0.29  | 0.48  | 0.73   | 1.27   |
| 0.39 | 70.86    | 138.86   | 261.83   | 543.92    | 0.80 | 0.24  | 0.39  | 0.60   | 1.03   |
| 0.40 | 62.01    | 120.69   | 228.54   | 479.08    | 0.81 | 0.20  | 0.32  | 0.49   | 0.81   |
| 0.41 | 54.00    | 106.19   | 197.26   | 427.22    | 0.82 | 0.17  | 0.27  | 0.40   | 0.65   |
| 0.42 | 47.58    | 92.62    | 170.18   | 368.97    | 0.83 | 0.14  | 0.22  | 0.32   | 0.52   |
| 0.43 | 41.69    | 81.86    | 150.01   | 325.91    | 0.84 | 0.11  | 0.18  | 0.26   | 0.42   |
| 0.44 | 37.00    | 71.01    | 130.50   | 281.86    | 0.85 | 0.09  | 0.14  | 0.21   | 0.33   |
| 0.45 | 32.40    | 62.00    | 111.91   | 242.12    | 0.86 | 0.08  | 0.12  | 0.16   | 0.25   |
| 0.46 | 28.24    | 53.91    | 98.33    | 211.41    | 0.87 | 0.06  | 0.09  | 0.13   | 0.20   |
| 0.47 | 24.69    | 47.94    | 87.59    | 188.37    | 0.88 | 0.05  | 0.07  | 0.10   | 0.15   |
| 0.48 | 21.74    | 41.96    | 76.89    | 161.82    | 0.89 | 0.04  | 0.06  | 0.08   | 0.11   |
| 0.49 | 19.18    | 36.41    | 65.72    | 138.08    | 0.90 | 0.04  | 0.05  | 0.06   | 0.09   |
| 0.50 | 16.89    | 31.89    | 57.51    | 120.33    |      |       |       |        |        |

Table S218: Critical values for detector  $\hat{H}_{mov}^{m,0.2}$  with windows size  $n = 0.2$ , and FM-OLS and D-OLS estimation in a model with intercept and linear trend. The number of integrated regressors is 2 and the highest power of  $x_{kt}$  is 2.

| m    | 90 %     | 95 %      | 97,5 %    | 99 %      | m    | 90 %  | 95 %  | 97,5 % | 99 %   |
|------|----------|-----------|-----------|-----------|------|-------|-------|--------|--------|
| 0.10 | 55347.42 | 126198.08 | 264403.36 | 620615.96 | 0.51 | 33.41 | 69.44 | 134.53 | 295.27 |
| 0.11 | 38359.08 | 86676.89  | 182153.18 | 436670.42 | 0.52 | 29.52 | 60.37 | 118.21 | 260.34 |
| 0.12 | 27414.38 | 62387.19  | 131510.95 | 317959.51 | 0.53 | 25.94 | 52.86 | 104.35 | 230.69 |
| 0.13 | 20163.95 | 45452.37  | 93705.15  | 228678.71 | 0.54 | 22.62 | 46.42 | 90.24  | 199.48 |
| 0.14 | 15003.63 | 33749.89  | 70985.60  | 166623.10 | 0.55 | 19.92 | 40.33 | 78.55  | 175.69 |
| 0.15 | 11558.70 | 26212.21  | 54377.43  | 130186.53 | 0.56 | 17.57 | 35.02 | 67.05  | 150.55 |
| 0.16 | 8919.67  | 20174.81  | 42667.13  | 100525.51 | 0.57 | 15.34 | 30.67 | 58.62  | 133.12 |
| 0.17 | 6987.07  | 15728.25  | 33426.66  | 80857.25  | 0.58 | 13.42 | 26.90 | 51.37  | 116.04 |
| 0.18 | 5560.44  | 12361.94  | 26100.46  | 64570.03  | 0.59 | 11.80 | 23.60 | 44.24  | 100.21 |
| 0.19 | 4510.28  | 9962.43   | 20540.98  | 51858.06  | 0.60 | 10.40 | 20.74 | 38.77  | 87.52  |
| 0.20 | 3662.77  | 8076.56   | 16834.17  | 41557.36  | 0.61 | 9.10  | 18.25 | 34.09  | 74.31  |
| 0.21 | 2976.62  | 6648.30   | 13620.42  | 33836.89  | 0.62 | 8.02  | 15.84 | 29.63  | 64.66  |
| 0.22 | 2416.25  | 5406.42   | 11232.29  | 26721.49  | 0.63 | 7.03  | 13.79 | 25.82  | 56.63  |
| 0.23 | 2000.88  | 4462.04   | 9204.29   | 20853.70  | 0.64 | 6.16  | 12.00 | 22.36  | 48.63  |
| 0.24 | 1666.42  | 3619.16   | 7603.41   | 17727.90  | 0.65 | 5.39  | 10.28 | 19.42  | 42.23  |
| 0.25 | 1385.29  | 3063.75   | 6263.59   | 14580.71  | 0.66 | 4.70  | 9.01  | 16.49  | 35.57  |
| 0.26 | 1172.88  | 2590.46   | 5334.33   | 12420.59  | 0.67 | 4.07  | 7.72  | 14.31  | 30.15  |
| 0.27 | 985.91   | 2192.15   | 4453.97   | 10578.55  | 0.68 | 3.53  | 6.66  | 12.03  | 25.83  |
| 0.28 | 828.85   | 1829.84   | 3755.24   | 8940.30   | 0.69 | 3.06  | 5.75  | 10.30  | 21.93  |
| 0.29 | 698.19   | 1541.56   | 3172.94   | 7480.08   | 0.70 | 2.67  | 4.95  | 8.95   | 18.21  |
| 0.30 | 600.56   | 1309.80   | 2618.09   | 6120.23   | 0.71 | 2.31  | 4.28  | 7.67   | 15.45  |
| 0.31 | 512.94   | 1115.69   | 2249.74   | 5221.49   | 0.72 | 1.99  | 3.69  | 6.55   | 13.05  |
| 0.32 | 438.63   | 944.79    | 1917.49   | 4552.37   | 0.73 | 1.71  | 3.16  | 5.63   | 11.23  |
| 0.33 | 379.23   | 812.18    | 1670.13   | 3876.07   | 0.74 | 1.48  | 2.69  | 4.85   | 9.36   |
| 0.34 | 326.06   | 696.69    | 1434.92   | 3362.87   | 0.75 | 1.26  | 2.29  | 4.07   | 8.08   |
| 0.35 | 282.33   | 608.46    | 1239.41   | 2900.23   | 0.76 | 1.07  | 1.95  | 3.39   | 6.70   |
| 0.36 | 241.97   | 530.85    | 1086.99   | 2514.65   | 0.77 | 0.91  | 1.63  | 2.78   | 5.61   |
| 0.37 | 211.58   | 457.31    | 939.80    | 2212.06   | 0.78 | 0.77  | 1.37  | 2.33   | 4.63   |
| 0.38 | 185.26   | 395.74    | 814.67    | 1858.11   | 0.79 | 0.65  | 1.15  | 1.93   | 3.74   |
| 0.39 | 161.40   | 342.49    | 708.29    | 1639.73   | 0.80 | 0.55  | 0.95  | 1.58   | 2.98   |
| 0.40 | 142.39   | 298.72    | 623.13    | 1440.02   | 0.81 | 0.45  | 0.78  | 1.29   | 2.39   |
| 0.41 | 123.53   | 263.25    | 537.64    | 1252.06   | 0.82 | 0.38  | 0.64  | 1.04   | 1.93   |
| 0.42 | 108.28   | 226.08    | 460.49    | 1070.81   | 0.83 | 0.31  | 0.53  | 0.84   | 1.54   |
| 0.43 | 94.19    | 195.51    | 401.73    | 925.55    | 0.84 | 0.26  | 0.43  | 0.68   | 1.23   |
| 0.44 | 82.66    | 173.29    | 349.10    | 792.13    | 0.85 | 0.21  | 0.35  | 0.55   | 0.97   |
| 0.45 | 73.02    | 152.16    | 305.71    | 686.40    | 0.86 | 0.17  | 0.28  | 0.43   | 0.75   |
| 0.46 | 63.79    | 134.21    | 263.42    | 591.40    | 0.87 | 0.14  | 0.22  | 0.34   | 0.59   |
| 0.47 | 55.94    | 117.52    | 229.52    | 512.76    | 0.88 | 0.11  | 0.18  | 0.27   | 0.46   |
| 0.48 | 49.12    | 102.71    | 202.04    | 451.37    | 0.89 | 0.09  | 0.14  | 0.21   | 0.34   |
| 0.49 | 43.20    | 90.13     | 175.50    | 397.03    | 0.90 | 0.07  | 0.11  | 0.16   | 0.26   |
| 0.50 | 38.11    | 79.57     | 154.48    | 347.53    |      |       |       |        |        |

Table S219: Critical values for detector  $\hat{H}_{mov}^{m,0.2}$  with windows size  $n = 0.2$ , and IM-OLS estimation in a model with intercept and linear trend. The number of integrated regressors is 2 and the highest power of  $x_{kt}$  is 2.

| m    | 90 %     | 95 %     | 97,5 %    | 99 %      | m    | 90 %  | 95 %  | 97,5 % | 99 %   |
|------|----------|----------|-----------|-----------|------|-------|-------|--------|--------|
| 0.10 | 25400.71 | 53898.26 | 107451.21 | 237742.26 | 0.51 | 16.23 | 30.69 | 55.16  | 109.84 |
| 0.11 | 17908.05 | 38037.20 | 75263.13  | 172135.01 | 0.52 | 14.30 | 26.67 | 48.03  | 95.78  |
| 0.12 | 12943.89 | 27050.92 | 55014.17  | 119944.78 | 0.53 | 12.43 | 23.20 | 41.49  | 82.59  |
| 0.13 | 9455.35  | 19667.22 | 38251.77  | 87688.00  | 0.54 | 11.02 | 20.31 | 36.36  | 74.26  |
| 0.14 | 7260.85  | 14959.08 | 29545.84  | 66464.20  | 0.55 | 9.59  | 17.69 | 31.68  | 64.16  |
| 0.15 | 5568.98  | 11371.58 | 22580.15  | 50213.34  | 0.56 | 8.41  | 15.43 | 27.49  | 55.69  |
| 0.16 | 4304.54  | 8854.59  | 17462.82  | 40066.69  | 0.57 | 7.44  | 13.66 | 23.84  | 47.64  |
| 0.17 | 3365.28  | 6920.85  | 13733.47  | 31802.74  | 0.58 | 6.52  | 11.99 | 20.46  | 41.76  |
| 0.18 | 2704.19  | 5489.04  | 10761.40  | 25201.84  | 0.59 | 5.67  | 10.37 | 17.95  | 35.91  |
| 0.19 | 2158.25  | 4372.88  | 8478.74   | 19569.70  | 0.60 | 5.00  | 8.96  | 15.68  | 30.68  |
| 0.20 | 1741.68  | 3567.88  | 6992.14   | 15828.37  | 0.61 | 4.39  | 7.98  | 13.62  | 26.93  |
| 0.21 | 1430.00  | 2873.70  | 5607.11   | 12944.95  | 0.62 | 3.85  | 6.88  | 11.87  | 23.46  |
| 0.22 | 1170.89  | 2352.85  | 4584.52   | 10371.09  | 0.63 | 3.37  | 6.03  | 10.38  | 20.64  |
| 0.23 | 971.68   | 1967.44  | 3787.15   | 8311.93   | 0.64 | 2.94  | 5.21  | 9.00   | 17.61  |
| 0.24 | 811.18   | 1646.71  | 3130.05   | 6925.99   | 0.65 | 2.57  | 4.52  | 7.70   | 14.83  |
| 0.25 | 676.68   | 1358.29  | 2617.51   | 5751.95   | 0.66 | 2.23  | 3.87  | 6.56   | 12.35  |
| 0.26 | 566.98   | 1147.28  | 2244.87   | 4793.08   | 0.67 | 1.93  | 3.39  | 5.63   | 10.89  |
| 0.27 | 478.98   | 987.44   | 1878.89   | 4142.41   | 0.68 | 1.68  | 2.92  | 4.84   | 9.33   |
| 0.28 | 405.45   | 833.26   | 1613.05   | 3500.80   | 0.69 | 1.44  | 2.52  | 4.19   | 8.16   |
| 0.29 | 349.42   | 701.18   | 1348.72   | 2904.14   | 0.70 | 1.24  | 2.14  | 3.60   | 6.64   |
| 0.30 | 296.04   | 600.04   | 1149.30   | 2449.35   | 0.71 | 1.08  | 1.84  | 3.04   | 5.70   |
| 0.31 | 256.13   | 508.86   | 959.02    | 2128.72   | 0.72 | 0.92  | 1.58  | 2.58   | 4.68   |
| 0.32 | 220.18   | 435.51   | 812.18    | 1785.57   | 0.73 | 0.79  | 1.34  | 2.19   | 4.08   |
| 0.33 | 187.53   | 370.10   | 695.75    | 1470.88   | 0.74 | 0.68  | 1.14  | 1.82   | 3.32   |
| 0.34 | 162.82   | 318.72   | 591.29    | 1251.07   | 0.75 | 0.57  | 0.95  | 1.52   | 2.74   |
| 0.35 | 139.90   | 276.67   | 510.04    | 1077.78   | 0.76 | 0.48  | 0.81  | 1.28   | 2.29   |
| 0.36 | 120.98   | 239.02   | 443.71    | 930.15    | 0.77 | 0.41  | 0.68  | 1.08   | 1.92   |
| 0.37 | 104.67   | 206.12   | 393.33    | 817.53    | 0.78 | 0.35  | 0.57  | 0.89   | 1.55   |
| 0.38 | 91.25    | 180.42   | 342.98    | 710.02    | 0.79 | 0.30  | 0.48  | 0.74   | 1.27   |
| 0.39 | 79.70    | 154.76   | 291.98    | 612.07    | 0.80 | 0.25  | 0.39  | 0.60   | 1.03   |
| 0.40 | 69.35    | 134.51   | 256.30    | 530.72    | 0.81 | 0.21  | 0.33  | 0.49   | 0.82   |
| 0.41 | 60.44    | 118.31   | 218.54    | 475.49    | 0.82 | 0.17  | 0.27  | 0.40   | 0.65   |
| 0.42 | 52.88    | 103.10   | 189.04    | 407.45    | 0.83 | 0.14  | 0.22  | 0.33   | 0.53   |
| 0.43 | 46.67    | 90.48    | 164.86    | 356.88    | 0.84 | 0.12  | 0.18  | 0.26   | 0.42   |
| 0.44 | 40.99    | 78.50    | 143.70    | 310.17    | 0.85 | 0.10  | 0.15  | 0.21   | 0.33   |
| 0.45 | 35.99    | 68.15    | 122.97    | 265.96    | 0.86 | 0.09  | 0.12  | 0.17   | 0.26   |
| 0.46 | 31.25    | 59.45    | 108.44    | 229.80    | 0.87 | 0.07  | 0.10  | 0.14   | 0.20   |
| 0.47 | 27.32    | 52.62    | 96.19     | 206.42    | 0.88 | 0.06  | 0.08  | 0.11   | 0.16   |
| 0.48 | 24.01    | 46.04    | 84.11     | 173.96    | 0.89 | 0.05  | 0.07  | 0.09   | 0.12   |
| 0.49 | 21.09    | 39.81    | 71.56     | 150.03    | 0.90 | 0.05  | 0.06  | 0.08   | 0.10   |
| 0.50 | 18.51    | 34.87    | 62.54     | 128.81    |      |       |       |        |        |

Table S220: Critical values for detector  $\hat{H}_{mov}^{m,0.3}$  with windows size  $n = 0.3$ , and FM-OLS and D-OLS estimation in a model with intercept and linear trend. The number of integrated regressors is 2 and the highest power of  $x_{kt}$  is 2.

| m    | 90 %     | 95 %      | 97,5 %    | 99 %      | m    | 90 %  | 95 %  | 97,5 % | 99 %   |
|------|----------|-----------|-----------|-----------|------|-------|-------|--------|--------|
| 0.10 | 60795.67 | 137958.43 | 289367.22 | 679706.95 | 0.51 | 36.56 | 75.81 | 146.33 | 317.90 |
| 0.11 | 42099.35 | 94938.99  | 201898.45 | 483449.27 | 0.52 | 32.20 | 65.65 | 127.68 | 279.54 |
| 0.12 | 30090.17 | 68320.59  | 144111.65 | 347580.81 | 0.53 | 28.22 | 56.90 | 112.49 | 246.65 |
| 0.13 | 22195.55 | 50183.51  | 103885.87 | 249547.79 | 0.54 | 24.49 | 49.95 | 96.65  | 214.98 |
| 0.14 | 16558.00 | 37364.94  | 78244.13  | 184576.74 | 0.55 | 21.55 | 43.33 | 83.85  | 185.69 |
| 0.15 | 12811.24 | 29033.80  | 59747.08  | 144197.03 | 0.56 | 18.88 | 37.45 | 71.60  | 160.38 |
| 0.16 | 9904.15  | 22400.98  | 47509.06  | 111196.76 | 0.57 | 16.55 | 32.65 | 62.15  | 140.91 |
| 0.17 | 7775.65  | 17480.82  | 37048.38  | 89322.13  | 0.58 | 14.36 | 28.71 | 54.34  | 121.58 |
| 0.18 | 6215.50  | 13727.57  | 29235.42  | 71821.16  | 0.59 | 12.61 | 25.09 | 46.85  | 106.43 |
| 0.19 | 5050.43  | 11095.64  | 22797.59  | 57543.50  | 0.60 | 11.07 | 21.95 | 40.66  | 91.54  |
| 0.20 | 4106.97  | 8968.61   | 18692.85  | 46751.48  | 0.61 | 9.65  | 19.32 | 35.69  | 77.38  |
| 0.21 | 3334.82  | 7412.49   | 15244.52  | 37771.38  | 0.62 | 8.48  | 16.63 | 30.97  | 67.28  |
| 0.22 | 2709.70  | 6057.36   | 12491.51  | 29903.72  | 0.63 | 7.40  | 14.48 | 26.85  | 58.44  |
| 0.23 | 2243.73  | 4981.16   | 10186.96  | 23391.14  | 0.64 | 6.46  | 12.55 | 23.19  | 49.98  |
| 0.24 | 1869.35  | 4054.15   | 8572.87   | 20043.33  | 0.65 | 5.64  | 10.70 | 20.09  | 43.48  |
| 0.25 | 1562.35  | 3418.99   | 7003.24   | 16401.97  | 0.66 | 4.90  | 9.31  | 17.00  | 36.74  |
| 0.26 | 1310.66  | 2903.74   | 5958.40   | 14057.45  | 0.67 | 4.23  | 7.98  | 14.68  | 30.77  |
| 0.27 | 1107.07  | 2455.44   | 5005.97   | 11931.29  | 0.68 | 3.65  | 6.84  | 12.35  | 26.28  |
| 0.28 | 932.42   | 2056.05   | 4220.48   | 10043.53  | 0.69 | 3.16  | 5.89  | 10.50  | 22.27  |
| 0.29 | 787.01   | 1731.25   | 3534.32   | 8383.48   | 0.70 | 2.74  | 5.06  | 9.10   | 18.52  |
| 0.30 | 677.00   | 1463.86   | 2952.10   | 6841.76   | 0.71 | 2.36  | 4.35  | 7.76   | 15.61  |
| 0.31 | 576.61   | 1251.60   | 2526.81   | 5856.59   | 0.72 | 2.02  | 3.75  | 6.65   | 13.19  |
| 0.32 | 492.90   | 1054.79   | 2136.54   | 5080.90   | 0.73 | 1.74  | 3.20  | 5.70   | 11.29  |
| 0.33 | 425.43   | 912.18    | 1863.67   | 4322.14   | 0.74 | 1.49  | 2.72  | 4.89   | 9.42   |
| 0.34 | 365.96   | 780.14    | 1589.93   | 3712.09   | 0.75 | 1.27  | 2.30  | 4.09   | 8.13   |
| 0.35 | 315.74   | 677.27    | 1378.78   | 3232.10   | 0.76 | 1.08  | 1.96  | 3.41   | 6.72   |
| 0.36 | 271.31   | 593.95    | 1209.63   | 2798.43   | 0.77 | 0.92  | 1.64  | 2.78   | 5.62   |
| 0.37 | 237.54   | 510.11    | 1046.86   | 2442.09   | 0.78 | 0.77  | 1.37  | 2.34   | 4.64   |
| 0.38 | 207.20   | 440.15    | 899.21    | 2067.56   | 0.79 | 0.65  | 1.15  | 1.94   | 3.74   |
| 0.39 | 180.40   | 379.41    | 793.61    | 1827.85   | 0.80 | 0.55  | 0.95  | 1.59   | 2.99   |
| 0.40 | 158.46   | 332.01    | 689.83    | 1586.62   | 0.81 | 0.46  | 0.78  | 1.29   | 2.39   |
| 0.41 | 137.78   | 292.97    | 593.04    | 1369.33   | 0.82 | 0.38  | 0.65  | 1.04   | 1.93   |
| 0.42 | 120.66   | 250.43    | 512.44    | 1172.21   | 0.83 | 0.32  | 0.53  | 0.84   | 1.54   |
| 0.43 | 104.56   | 216.31    | 440.60    | 1022.90   | 0.84 | 0.26  | 0.43  | 0.68   | 1.24   |
| 0.44 | 91.76    | 191.81    | 382.96    | 872.11    | 0.85 | 0.21  | 0.35  | 0.55   | 0.97   |
| 0.45 | 80.66    | 168.54    | 334.23    | 752.85    | 0.86 | 0.17  | 0.28  | 0.44   | 0.76   |
| 0.46 | 70.57    | 147.73    | 288.96    | 647.40    | 0.87 | 0.14  | 0.23  | 0.35   | 0.59   |
| 0.47 | 61.63    | 128.88    | 250.51    | 560.72    | 0.88 | 0.11  | 0.18  | 0.27   | 0.46   |
| 0.48 | 53.97    | 112.47    | 219.16    | 487.61    | 0.89 | 0.09  | 0.14  | 0.21   | 0.35   |
| 0.49 | 47.37    | 98.51     | 191.39    | 430.85    | 0.90 | 0.07  | 0.11  | 0.16   | 0.26   |
| 0.50 | 41.57    | 86.44     | 168.71    | 373.12    |      |       |       |        |        |

Table S221: Critical values for detector  $\hat{H}_{mov}^{m,0.3}$  with windows size  $n = 0.3$ , and IM-OLS estimation in a model with intercept and linear trend. The number of integrated regressors is 2 and the highest power of  $x_{kt}$  is 2.

| m    | 90 %      | 95 %       | 97,5 %     | 99 %        | m    | 90 %  | 95 %   | 97,5 % | 99 %    |
|------|-----------|------------|------------|-------------|------|-------|--------|--------|---------|
| 0.10 | 767549.60 | 2716390.73 | 7767033.95 | 25404825.59 | 0.51 | 69.86 | 253.32 | 707.77 | 2093.58 |
| 0.11 | 486426.20 | 1702456.28 | 4975594.35 | 16018980.24 | 0.52 | 60.10 | 212.18 | 586.32 | 1802.32 |
| 0.12 | 334132.69 | 1198129.70 | 3358690.62 | 10916167.39 | 0.53 | 49.88 | 176.88 | 488.19 | 1511.13 |
| 0.13 | 227101.38 | 818386.62  | 2362231.41 | 7476640.59  | 0.54 | 41.85 | 151.01 | 414.14 | 1272.22 |
| 0.14 | 158547.13 | 582158.64  | 1725680.94 | 5241274.81  | 0.55 | 35.23 | 125.92 | 344.95 | 1056.20 |
| 0.15 | 114060.57 | 426239.94  | 1228796.72 | 3802337.76  | 0.56 | 30.11 | 109.33 | 305.53 | 886.46  |
| 0.16 | 80796.94  | 298440.33  | 884276.16  | 2982204.02  | 0.57 | 25.42 | 90.19  | 249.53 | 745.55  |
| 0.17 | 61374.52  | 217973.87  | 631111.32  | 2135310.72  | 0.58 | 21.13 | 74.38  | 210.58 | 639.94  |
| 0.18 | 45300.48  | 163288.08  | 481257.82  | 1621773.74  | 0.59 | 17.87 | 62.14  | 174.52 | 540.95  |
| 0.19 | 34534.57  | 126349.26  | 366231.79  | 1250302.41  | 0.60 | 15.12 | 52.78  | 146.00 | 466.08  |
| 0.20 | 26714.94  | 97840.34   | 285689.81  | 981727.66   | 0.61 | 12.99 | 44.48  | 125.15 | 389.44  |
| 0.21 | 20487.63  | 74993.29   | 219229.57  | 761257.38   | 0.62 | 10.88 | 37.40  | 103.56 | 324.97  |
| 0.22 | 15759.71  | 58640.05   | 170402.86  | 559476.79   | 0.63 | 9.28  | 31.62  | 86.39  | 268.52  |
| 0.23 | 12854.65  | 46597.57   | 133952.60  | 433715.90   | 0.64 | 7.68  | 25.94  | 71.38  | 224.96  |
| 0.24 | 9954.18   | 37683.13   | 106997.20  | 343181.09   | 0.65 | 6.36  | 21.57  | 58.50  | 179.76  |
| 0.25 | 8034.20   | 29044.47   | 85721.63   | 273434.83   | 0.66 | 5.35  | 17.92  | 48.27  | 145.56  |
| 0.26 | 6401.29   | 23652.80   | 68265.75   | 224603.56   | 0.67 | 4.45  | 14.94  | 40.56  | 120.82  |
| 0.27 | 5283.86   | 19042.46   | 56005.90   | 179169.33   | 0.68 | 3.77  | 12.18  | 32.55  | 101.74  |
| 0.28 | 4169.82   | 15633.16   | 44371.24   | 143449.25   | 0.69 | 3.20  | 10.14  | 27.22  | 80.48   |
| 0.29 | 3368.30   | 12432.30   | 35846.84   | 117593.20   | 0.70 | 2.63  | 8.34   | 22.31  | 64.79   |
| 0.30 | 2782.74   | 10026.96   | 28942.86   | 94789.23    | 0.71 | 2.18  | 7.09   | 18.36  | 54.39   |
| 0.31 | 2292.47   | 8335.22    | 24261.42   | 80151.75    | 0.72 | 1.85  | 5.91   | 15.20  | 45.10   |
| 0.32 | 1871.40   | 6724.85    | 19838.15   | 67014.88    | 0.73 | 1.52  | 4.77   | 12.29  | 35.17   |
| 0.33 | 1578.36   | 5627.97    | 16388.53   | 56259.86    | 0.74 | 1.26  | 3.83   | 9.78   | 28.35   |
| 0.34 | 1302.68   | 4618.76    | 13562.42   | 45258.80    | 0.75 | 1.03  | 3.14   | 7.90   | 21.84   |
| 0.35 | 1101.99   | 3881.64    | 11297.42   | 37955.17    | 0.76 | 0.84  | 2.54   | 6.43   | 17.71   |
| 0.36 | 908.38    | 3184.05    | 9076.33    | 30115.45    | 0.77 | 0.69  | 2.05   | 5.15   | 13.97   |
| 0.37 | 754.89    | 2661.06    | 7645.13    | 24070.20    | 0.78 | 0.56  | 1.62   | 4.12   | 11.43   |
| 0.38 | 633.70    | 2256.73    | 6509.69    | 21046.67    | 0.79 | 0.45  | 1.30   | 3.13   | 8.44    |
| 0.39 | 534.96    | 1887.72    | 5398.76    | 17364.70    | 0.80 | 0.36  | 1.02   | 2.49   | 6.39    |
| 0.40 | 446.21    | 1608.14    | 4452.02    | 14714.15    | 0.81 | 0.29  | 0.79   | 1.89   | 4.93    |
| 0.41 | 372.99    | 1361.20    | 3827.52    | 12117.92    | 0.82 | 0.24  | 0.62   | 1.47   | 3.80    |
| 0.42 | 314.38    | 1124.32    | 3128.50    | 10557.26    | 0.83 | 0.19  | 0.48   | 1.11   | 2.81    |
| 0.43 | 264.12    | 950.58     | 2620.35    | 8661.87     | 0.84 | 0.15  | 0.36   | 0.83   | 2.03    |
| 0.44 | 223.98    | 797.27     | 2244.39    | 7286.70     | 0.85 | 0.12  | 0.27   | 0.61   | 1.47    |
| 0.45 | 191.00    | 680.04     | 1887.89    | 6261.11     | 0.86 | 0.09  | 0.20   | 0.44   | 1.06    |
| 0.46 | 161.88    | 574.73     | 1600.30    | 5208.20     | 0.87 | 0.07  | 0.15   | 0.33   | 0.77    |
| 0.47 | 135.97    | 488.06     | 1394.25    | 4496.45     | 0.88 | 0.05  | 0.11   | 0.22   | 0.52    |
| 0.48 | 115.52    | 407.66     | 1186.10    | 3698.08     | 0.89 | 0.04  | 0.08   | 0.15   | 0.36    |
| 0.49 | 96.59     | 338.82     | 966.61     | 3030.44     | 0.90 | 0.03  | 0.06   | 0.10   | 0.24    |
| 0.50 | 81.77     | 292.05     | 827.12     | 2548.41     |      |       |        |        |         |

Table S222: Critical values for detector  $\hat{H}_{mov}^{m,0.1}$  with windows size  $n = 0.1$ , and FM-OLS and D-OLS estimation in a model with intercept. The number of integrated regressors is 2 and the highest power of  $x_{kt}$  is 3.

| m    | 90 %       | 95 %        | 97,5 %      | 99 %         | m    | 90 %   | 95 %    | 97,5 %  | 99 %     |
|------|------------|-------------|-------------|--------------|------|--------|---------|---------|----------|
| 0.10 | 3053787.03 | 12116304.97 | 37879723.65 | 135813036.02 | 0.51 | 272.24 | 1088.30 | 3373.72 | 11897.58 |
| 0.11 | 1971222.07 | 7672376.15  | 24213015.01 | 86676764.06  | 0.52 | 231.19 | 929.18  | 2839.44 | 9884.08  |
| 0.12 | 1339895.47 | 5079100.84  | 15920980.00 | 57730244.53  | 0.53 | 194.82 | 769.40  | 2336.31 | 8534.90  |
| 0.13 | 905517.46  | 3471332.45  | 10580572.93 | 40128884.03  | 0.54 | 165.24 | 644.23  | 1989.86 | 7142.73  |
| 0.14 | 626136.89  | 2427883.88  | 7531707.15  | 27858957.07  | 0.55 | 141.44 | 553.95  | 1635.62 | 6075.68  |
| 0.15 | 443922.11  | 1730854.77  | 5565076.64  | 19585035.66  | 0.56 | 118.30 | 454.12  | 1394.55 | 4989.85  |
| 0.16 | 325191.97  | 1272301.60  | 3985034.41  | 14160792.58  | 0.57 | 99.81  | 389.33  | 1185.49 | 4229.30  |
| 0.17 | 240307.33  | 948510.77   | 2902971.99  | 10695848.24  | 0.58 | 84.15  | 330.46  | 992.20  | 3668.93  |
| 0.18 | 182154.01  | 720393.06   | 2265580.51  | 7938212.34   | 0.59 | 71.02  | 273.16  | 834.30  | 3014.24  |
| 0.19 | 140240.97  | 551827.17   | 1689331.17  | 6370272.72   | 0.60 | 58.92  | 230.05  | 712.98  | 2502.05  |
| 0.20 | 107174.87  | 421616.58   | 1314152.20  | 4879483.05   | 0.61 | 49.33  | 193.38  | 591.05  | 2043.73  |
| 0.21 | 83055.63   | 324489.79   | 1018441.75  | 3857917.03   | 0.62 | 41.57  | 162.89  | 492.45  | 1690.08  |
| 0.22 | 64410.64   | 258420.71   | 801628.09   | 2928936.02   | 0.63 | 35.31  | 135.19  | 411.63  | 1372.07  |
| 0.23 | 50056.03   | 197179.69   | 604727.18   | 2347790.72   | 0.64 | 29.86  | 113.15  | 345.38  | 1155.59  |
| 0.24 | 40121.30   | 158201.94   | 489505.10   | 1823273.21   | 0.65 | 24.92  | 93.05   | 281.02  | 935.08   |
| 0.25 | 32412.72   | 128052.05   | 402029.46   | 1463828.13   | 0.66 | 20.81  | 77.05   | 226.70  | 761.44   |
| 0.26 | 25866.25   | 103389.52   | 320376.58   | 1185727.63   | 0.67 | 17.44  | 64.94   | 190.67  | 624.02   |
| 0.27 | 20554.94   | 82328.78    | 264805.00   | 954217.48    | 0.68 | 14.49  | 53.45   | 156.74  | 509.20   |
| 0.28 | 16492.32   | 66933.38    | 211663.21   | 784555.96    | 0.69 | 11.95  | 43.53   | 128.20  | 416.41   |
| 0.29 | 13325.22   | 54577.59    | 173137.23   | 645768.14    | 0.70 | 9.77   | 35.29   | 105.06  | 335.97   |
| 0.30 | 11090.53   | 44540.18    | 138475.55   | 513482.65    | 0.71 | 8.14   | 29.29   | 85.35   | 275.29   |
| 0.31 | 9055.98    | 36082.83    | 110945.88   | 425647.36    | 0.72 | 6.84   | 24.06   | 72.32   | 230.44   |
| 0.32 | 7530.62    | 29155.15    | 94060.39    | 353059.52    | 0.73 | 5.61   | 19.86   | 57.55   | 182.30   |
| 0.33 | 6251.93    | 24418.53    | 78066.78    | 293330.22    | 0.74 | 4.58   | 16.09   | 45.59   | 145.46   |
| 0.34 | 5153.08    | 20792.73    | 65144.58    | 235095.31    | 0.75 | 3.74   | 12.96   | 36.56   | 115.11   |
| 0.35 | 4292.56    | 17214.55    | 54227.51    | 189955.11    | 0.76 | 3.04   | 10.48   | 29.25   | 93.18    |
| 0.36 | 3579.73    | 14156.51    | 44159.80    | 155527.78    | 0.77 | 2.44   | 8.30    | 23.21   | 71.83    |
| 0.37 | 3005.25    | 11968.14    | 36374.67    | 122131.93    | 0.78 | 1.99   | 6.58    | 18.36   | 57.52    |
| 0.38 | 2518.89    | 9921.04     | 29948.00    | 103075.03    | 0.79 | 1.60   | 5.31    | 14.29   | 45.60    |
| 0.39 | 2082.35    | 8353.14     | 25016.14    | 85771.89     | 0.80 | 1.26   | 4.14    | 11.33   | 33.09    |
| 0.40 | 1765.14    | 6894.27     | 21015.75    | 71532.55     | 0.81 | 0.99   | 3.24    | 8.68    | 26.51    |
| 0.41 | 1466.34    | 5814.94     | 17395.23    | 61073.10     | 0.82 | 0.79   | 2.53    | 6.58    | 19.89    |
| 0.42 | 1235.99    | 4929.76     | 14857.42    | 51900.49     | 0.83 | 0.62   | 1.91    | 4.99    | 14.48    |
| 0.43 | 1039.52    | 4159.44     | 12602.11    | 44832.13     | 0.84 | 0.49   | 1.43    | 3.64    | 10.85    |
| 0.44 | 882.81     | 3498.62     | 10756.22    | 37496.18     | 0.85 | 0.38   | 1.09    | 2.72    | 7.76     |
| 0.45 | 742.16     | 2931.89     | 9051.43     | 32256.54     | 0.86 | 0.29   | 0.80    | 2.01    | 5.58     |
| 0.46 | 624.79     | 2463.83     | 7781.91     | 27210.18     | 0.87 | 0.22   | 0.60    | 1.45    | 3.94     |
| 0.47 | 532.61     | 2096.42     | 6592.97     | 22338.49     | 0.88 | 0.17   | 0.44    | 1.02    | 2.70     |
| 0.48 | 449.58     | 1745.47     | 5532.10     | 18868.50     | 0.89 | 0.13   | 0.31    | 0.71    | 1.88     |
| 0.49 | 377.65     | 1488.34     | 4790.56     | 16245.45     | 0.90 | 0.10   | 0.22    | 0.50    | 1.27     |
| 0.50 | 324.57     | 1263.40     | 3993.82     | 14084.76     |      |        |         |         |          |

Table S223: Critical values for detector  $\hat{H}_{mov}^{m,0.1}$  with windows size  $n = 0.1$ , and IM-OLS estimation in a model with intercept. The number of integrated regressors is 2 and the highest power of  $x_{kt}$  is 3.



| m    | 90 %       | 95 %       | 97,5 %      | 99 %        | m    | 90 %  | 95 %   | 97,5 % | 99 %    |
|------|------------|------------|-------------|-------------|------|-------|--------|--------|---------|
| 0.10 | 1127760.18 | 4035509.72 | 11706677.48 | 38643400.23 | 0.51 | 94.57 | 335.61 | 937.54 | 2763.78 |
| 0.11 | 724218.22  | 2519369.68 | 7466905.03  | 24409863.78 | 0.52 | 80.94 | 281.37 | 772.35 | 2362.23 |
| 0.12 | 489448.75  | 1775558.84 | 4975153.56  | 16389515.39 | 0.53 | 66.24 | 234.04 | 642.06 | 1962.22 |
| 0.13 | 333299.43  | 1209928.41 | 3535252.34  | 11142220.27 | 0.54 | 55.54 | 198.26 | 538.66 | 1635.52 |
| 0.14 | 233457.77  | 859844.65  | 2571925.98  | 7873104.37  | 0.55 | 46.93 | 164.14 | 446.61 | 1360.46 |
| 0.15 | 168535.79  | 628105.45  | 1817605.01  | 5748197.51  | 0.56 | 39.68 | 142.18 | 395.60 | 1125.54 |
| 0.16 | 119104.99  | 441865.18  | 1312435.76  | 4425340.98  | 0.57 | 32.96 | 116.34 | 316.37 | 941.97  |
| 0.17 | 89772.36   | 321923.51  | 929509.34   | 3246946.58  | 0.58 | 27.60 | 95.45  | 267.36 | 801.63  |
| 0.18 | 66855.79   | 241397.27  | 716814.68   | 2406411.01  | 0.59 | 22.95 | 80.53  | 218.52 | 678.83  |
| 0.19 | 50665.66   | 186116.92  | 536132.34   | 1853619.65  | 0.60 | 19.34 | 66.81  | 185.41 | 582.31  |
| 0.20 | 39053.01   | 144658.34  | 422892.72   | 1450539.09  | 0.61 | 16.67 | 57.14  | 157.03 | 474.65  |
| 0.21 | 29865.81   | 109509.01  | 318667.39   | 1109807.75  | 0.62 | 13.77 | 46.80  | 128.60 | 398.76  |
| 0.22 | 22898.84   | 86112.59   | 249735.98   | 820060.78   | 0.63 | 11.67 | 39.85  | 107.96 | 330.00  |
| 0.23 | 18622.11   | 68084.83   | 196005.41   | 638437.25   | 0.64 | 9.57  | 32.30  | 86.67  | 268.50  |
| 0.24 | 14380.04   | 54667.85   | 156112.15   | 503534.39   | 0.65 | 7.94  | 26.69  | 71.52  | 213.75  |
| 0.25 | 11605.84   | 42424.42   | 122810.96   | 403948.52   | 0.66 | 6.62  | 21.66  | 57.78  | 171.60  |
| 0.26 | 9206.85    | 34058.36   | 99217.95    | 325218.94   | 0.67 | 5.46  | 18.03  | 48.02  | 141.42  |
| 0.27 | 7643.67    | 27642.19   | 80595.20    | 261082.27   | 0.68 | 4.63  | 14.59  | 38.67  | 116.76  |
| 0.28 | 5992.69    | 22681.73   | 63856.00    | 209766.41   | 0.69 | 3.87  | 12.02  | 31.81  | 93.18   |
| 0.29 | 4813.31    | 17933.59   | 51764.64    | 168175.04   | 0.70 | 3.15  | 9.81   | 25.75  | 74.61   |
| 0.30 | 3994.68    | 14473.53   | 41937.38    | 134482.15   | 0.71 | 2.62  | 8.31   | 21.20  | 61.68   |
| 0.31 | 3272.21    | 11871.56   | 34829.83    | 114877.97   | 0.72 | 2.21  | 6.89   | 17.23  | 49.98   |
| 0.32 | 2678.09    | 9574.95    | 28394.76    | 96677.23    | 0.73 | 1.79  | 5.45   | 13.83  | 39.52   |
| 0.33 | 2247.74    | 8007.71    | 23502.12    | 79009.86    | 0.74 | 1.47  | 4.36   | 10.96  | 31.79   |
| 0.34 | 1852.09    | 6525.36    | 19186.89    | 65048.73    | 0.75 | 1.19  | 3.55   | 8.80   | 23.75   |
| 0.35 | 1560.84    | 5495.14    | 15863.96    | 53865.96    | 0.76 | 0.96  | 2.80   | 7.04   | 19.16   |
| 0.36 | 1280.58    | 4504.44    | 12778.78    | 42499.57    | 0.77 | 0.78  | 2.28   | 5.58   | 15.00   |
| 0.37 | 1062.32    | 3751.25    | 10690.80    | 33957.06    | 0.78 | 0.63  | 1.79   | 4.47   | 12.22   |
| 0.38 | 892.44     | 3152.27    | 9206.60     | 29311.80    | 0.79 | 0.50  | 1.41   | 3.33   | 8.94    |
| 0.39 | 748.17     | 2644.57    | 7594.20     | 23704.92    | 0.80 | 0.39  | 1.08   | 2.61   | 6.73    |
| 0.40 | 626.46     | 2240.99    | 6155.33     | 20220.02    | 0.81 | 0.32  | 0.83   | 1.97   | 5.11    |
| 0.41 | 519.59     | 1891.35    | 5193.69     | 16642.34    | 0.82 | 0.25  | 0.65   | 1.53   | 3.93    |
| 0.42 | 435.37     | 1565.65    | 4339.22     | 14309.09    | 0.83 | 0.20  | 0.50   | 1.14   | 2.85    |
| 0.43 | 365.18     | 1303.02    | 3578.15     | 11787.83    | 0.84 | 0.16  | 0.37   | 0.84   | 2.06    |
| 0.44 | 307.54     | 1085.57    | 3046.19     | 9893.48     | 0.85 | 0.13  | 0.28   | 0.62   | 1.48    |
| 0.45 | 260.10     | 926.91     | 2581.05     | 8385.66     | 0.86 | 0.10  | 0.21   | 0.45   | 1.06    |
| 0.46 | 221.03     | 779.44     | 2204.16     | 6900.91     | 0.87 | 0.08  | 0.16   | 0.33   | 0.77    |
| 0.47 | 186.63     | 655.49     | 1894.48     | 6090.87     | 0.88 | 0.07  | 0.12   | 0.23   | 0.53    |
| 0.48 | 157.89     | 555.85     | 1596.10     | 4922.86     | 0.89 | 0.06  | 0.09   | 0.16   | 0.36    |
| 0.49 | 130.19     | 455.99     | 1293.93     | 4062.74     | 0.90 | 0.05  | 0.07   | 0.12   | 0.24    |
| 0.50 | 110.39     | 390.08     | 1095.28     | 3359.01     |      |       |        |        |         |

Table S224: Critical values for detector  $\hat{H}_{mov}^{m,0.2}$  with windows size  $n = 0.2$ , and FM-OLS and D-OLS estimation in a model with intercept. The number of integrated regressors is 2 and the highest power of  $x_{kt}$  is 3.

| m    | 90 %       | 95 %        | 97,5 %      | 99 %         | m    | 90 %   | 95 %    | 97,5 %  | 99 %     |
|------|------------|-------------|-------------|--------------|------|--------|---------|---------|----------|
| 0.10 | 4502350.87 | 18039732.84 | 55997944.91 | 202826112.29 | 0.51 | 363.23 | 1450.56 | 4491.61 | 15582.89 |
| 0.11 | 2931336.98 | 11448896.24 | 36502647.45 | 128348483.23 | 0.52 | 308.93 | 1229.56 | 3702.18 | 12574.59 |
| 0.12 | 1987774.41 | 7499749.64  | 23716059.52 | 85792445.85  | 0.53 | 259.82 | 1009.55 | 3048.34 | 10970.80 |
| 0.13 | 1336390.79 | 5171455.66  | 15898623.30 | 59863555.41  | 0.54 | 221.51 | 843.48  | 2606.23 | 9224.52  |
| 0.14 | 914211.74  | 3636481.86  | 11257183.73 | 41987833.43  | 0.55 | 187.29 | 726.65  | 2163.03 | 7832.24  |
| 0.15 | 654980.86  | 2560957.18  | 8255345.12  | 29633073.99  | 0.56 | 155.70 | 593.33  | 1807.16 | 6453.19  |
| 0.16 | 477307.85  | 1884761.65  | 5871275.62  | 21051452.67  | 0.57 | 130.69 | 503.40  | 1517.43 | 5398.19  |
| 0.17 | 353267.55  | 1389105.19  | 4300680.69  | 15978980.22  | 0.58 | 110.17 | 424.32  | 1264.02 | 4636.90  |
| 0.18 | 266751.48  | 1050040.83  | 3354476.27  | 11868152.30  | 0.59 | 91.61  | 350.51  | 1067.24 | 3870.99  |
| 0.19 | 205559.99  | 808570.74   | 2473227.76  | 9247619.46   | 0.60 | 75.90  | 290.42  | 901.24  | 3111.11  |
| 0.20 | 157324.74  | 622430.54   | 1933883.78  | 7313519.34   | 0.61 | 62.96  | 244.61  | 736.46  | 2522.20  |
| 0.21 | 120321.49  | 469853.65   | 1498985.57  | 5621470.84   | 0.62 | 52.81  | 205.10  | 612.42  | 2074.74  |
| 0.22 | 93129.44   | 373238.11   | 1171231.21  | 4341937.87   | 0.63 | 44.76  | 167.86  | 505.34  | 1653.36  |
| 0.23 | 72211.76   | 287408.84   | 884318.10   | 3423479.24   | 0.64 | 37.39  | 140.71  | 419.24  | 1406.55  |
| 0.24 | 57725.91   | 228249.02   | 719992.28   | 2672314.72   | 0.65 | 31.09  | 115.36  | 340.81  | 1108.71  |
| 0.25 | 46652.15   | 184949.58   | 585827.07   | 2083445.21   | 0.66 | 25.90  | 93.35   | 276.17  | 917.09   |
| 0.26 | 37024.56   | 150201.11   | 468360.91   | 1702678.44   | 0.67 | 21.47  | 78.21   | 228.66  | 729.90   |
| 0.27 | 29550.04   | 119610.94   | 381159.23   | 1379122.47   | 0.68 | 17.75  | 64.14   | 185.36  | 591.75   |
| 0.28 | 23781.60   | 97022.33    | 300000.08   | 1129321.88   | 0.69 | 14.61  | 51.70   | 152.18  | 488.77   |
| 0.29 | 19110.06   | 78245.21    | 246583.00   | 917357.24    | 0.70 | 11.81  | 41.65   | 123.00  | 391.89   |
| 0.30 | 15820.71   | 64026.65    | 197240.61   | 743923.34    | 0.71 | 9.71   | 34.39   | 97.54   | 314.06   |
| 0.31 | 12972.02   | 51542.95    | 159842.76   | 605489.41    | 0.72 | 8.05   | 28.02   | 81.66   | 256.29   |
| 0.32 | 10776.43   | 41948.30    | 132141.27   | 504256.63    | 0.73 | 6.57   | 22.82   | 64.98   | 205.36   |
| 0.33 | 8854.48    | 34818.57    | 112118.28   | 412951.30    | 0.74 | 5.36   | 18.32   | 51.33   | 161.73   |
| 0.34 | 7303.13    | 29090.94    | 92687.89    | 337710.56    | 0.75 | 4.34   | 14.67   | 40.56   | 125.77   |
| 0.35 | 6094.32    | 24325.71    | 75888.20    | 271111.35    | 0.76 | 3.48   | 11.72   | 32.56   | 100.08   |
| 0.36 | 5055.21    | 20022.65    | 62421.95    | 216641.65    | 0.77 | 2.78   | 9.19    | 25.45   | 77.65    |
| 0.37 | 4225.99    | 16805.79    | 51260.59    | 173655.92    | 0.78 | 2.23   | 7.25    | 19.80   | 61.31    |
| 0.38 | 3517.07    | 13968.48    | 42194.94    | 144929.34    | 0.79 | 1.77   | 5.71    | 15.34   | 48.36    |
| 0.39 | 2944.59    | 11661.31    | 35111.44    | 118674.22    | 0.80 | 1.39   | 4.47    | 12.00   | 35.13    |
| 0.40 | 2460.11    | 9693.68     | 29030.24    | 98983.26     | 0.81 | 1.08   | 3.44    | 9.11    | 27.42    |
| 0.41 | 2048.37    | 8160.29     | 23939.24    | 84299.33     | 0.82 | 0.85   | 2.65    | 6.87    | 20.65    |
| 0.42 | 1707.83    | 6880.19     | 20521.55    | 72342.50     | 0.83 | 0.67   | 2.00    | 5.20    | 14.96    |
| 0.43 | 1441.72    | 5690.47     | 17268.37    | 61023.17     | 0.84 | 0.52   | 1.48    | 3.75    | 11.07    |
| 0.44 | 1218.05    | 4799.53     | 14756.08    | 51387.97     | 0.85 | 0.40   | 1.12    | 2.78    | 7.89     |
| 0.45 | 1017.27    | 4002.09     | 12300.50    | 43776.01     | 0.86 | 0.30   | 0.82    | 2.05    | 5.66     |
| 0.46 | 860.10     | 3385.83     | 10494.01    | 37115.96     | 0.87 | 0.23   | 0.61    | 1.46    | 3.98     |
| 0.47 | 724.39     | 2837.28     | 8846.87     | 30025.96     | 0.88 | 0.17   | 0.44    | 1.03    | 2.71     |
| 0.48 | 612.06     | 2353.45     | 7438.31     | 25597.66     | 0.89 | 0.13   | 0.31    | 0.72    | 1.89     |
| 0.49 | 510.15     | 1992.68     | 6404.62     | 21594.90     | 0.90 | 0.10   | 0.22    | 0.50    | 1.27     |
| 0.50 | 436.89     | 1694.87     | 5221.99     | 18276.53     |      |        |         |         |          |

Table S225: Critical values for detector  $\hat{H}_{mov}^{m,0.2}$  with windows size  $n = 0.2$ , and IM-OLS estimation in a model with intercept. The number of integrated regressors is 2 and the highest power of  $x_{kt}$  is 3.

| m    | 90 %       | 95 %       | 97,5 %      | 99 %        | m    | 90 %   | 95 %   | 97,5 % | 99 %    |
|------|------------|------------|-------------|-------------|------|--------|--------|--------|---------|
| 0.10 | 1293562.89 | 4626805.56 | 13516529.00 | 44242037.85 | 0.51 | 101.79 | 355.98 | 993.77 | 2908.81 |
| 0.11 | 833299.96  | 2911487.59 | 8592779.43  | 28283097.67 | 0.52 | 86.00  | 299.56 | 821.03 | 2485.97 |
| 0.12 | 559058.09  | 2025155.09 | 5762424.53  | 19110253.23 | 0.53 | 71.06  | 248.38 | 679.34 | 2056.31 |
| 0.13 | 383519.56  | 1396099.43 | 4065974.01  | 12849436.51 | 0.54 | 59.24  | 210.34 | 567.81 | 1700.22 |
| 0.14 | 266906.25  | 984788.44  | 2967830.83  | 9054079.82  | 0.55 | 49.92  | 173.78 | 471.09 | 1413.84 |
| 0.15 | 190832.78  | 719442.09  | 2089399.68  | 6646209.56  | 0.56 | 41.91  | 149.05 | 410.45 | 1170.69 |
| 0.16 | 135895.37  | 508223.89  | 1489896.14  | 5065515.43  | 0.57 | 34.86  | 121.43 | 330.45 | 973.59  |
| 0.17 | 102682.09  | 367949.45  | 1070191.00  | 3731488.81  | 0.58 | 29.14  | 100.03 | 279.18 | 822.20  |
| 0.18 | 76121.83   | 274752.68  | 824863.02   | 2781956.92  | 0.59 | 24.09  | 83.77  | 227.70 | 697.57  |
| 0.19 | 57367.73   | 213371.89  | 615661.41   | 2113434.55  | 0.60 | 20.30  | 69.36  | 191.68 | 595.24  |
| 0.20 | 44252.32   | 164658.36  | 481053.52   | 1648050.27  | 0.61 | 17.38  | 59.14  | 162.01 | 482.71  |
| 0.21 | 33698.05   | 125223.08  | 365002.64   | 1270142.21  | 0.62 | 14.29  | 48.38  | 132.89 | 405.98  |
| 0.22 | 26051.76   | 97656.88   | 283155.35   | 928230.01   | 0.63 | 12.06  | 41.01  | 110.80 | 338.18  |
| 0.23 | 21161.74   | 76902.28   | 223318.73   | 722514.29   | 0.64 | 9.86   | 33.09  | 88.30  | 273.18  |
| 0.24 | 16290.36   | 61103.19   | 178786.68   | 576349.94   | 0.65 | 8.18   | 27.27  | 72.82  | 217.33  |
| 0.25 | 13069.45   | 47638.89   | 137954.48   | 459112.00   | 0.66 | 6.80   | 22.06  | 59.04  | 173.18  |
| 0.26 | 10382.57   | 38419.16   | 112457.96   | 365058.06   | 0.67 | 5.61   | 18.37  | 48.64  | 142.64  |
| 0.27 | 8617.82    | 31108.26   | 91046.07    | 292458.15   | 0.68 | 4.71   | 14.83  | 39.00  | 117.92  |
| 0.28 | 6731.68    | 25461.06   | 71767.49    | 234145.24   | 0.69 | 3.93   | 12.14  | 32.05  | 93.43   |
| 0.29 | 5433.13    | 20142.04   | 57856.22    | 189926.18   | 0.70 | 3.20   | 9.90   | 25.93  | 74.85   |
| 0.30 | 4467.78    | 16113.06   | 46854.99    | 150980.50   | 0.71 | 2.65   | 8.36   | 21.28  | 61.90   |
| 0.31 | 3680.19    | 13300.47   | 38894.61    | 127580.19   | 0.72 | 2.23   | 6.93   | 17.28  | 50.05   |
| 0.32 | 2996.55    | 10741.57   | 31825.63    | 106981.72   | 0.73 | 1.80   | 5.47   | 13.89  | 39.58   |
| 0.33 | 2497.02    | 8881.52    | 25932.61    | 86595.84    | 0.74 | 1.48   | 4.37   | 10.97  | 31.81   |
| 0.34 | 2065.17    | 7255.37    | 21220.62    | 72766.58    | 0.75 | 1.19   | 3.55   | 8.83   | 23.77   |
| 0.35 | 1726.27    | 6088.65    | 17561.93    | 59329.67    | 0.76 | 0.96   | 2.81   | 7.05   | 19.16   |
| 0.36 | 1422.66    | 5008.25    | 14161.54    | 47088.24    | 0.77 | 0.78   | 2.28   | 5.58   | 15.00   |
| 0.37 | 1179.32    | 4150.87    | 11703.75    | 37253.03    | 0.78 | 0.63   | 1.79   | 4.47   | 12.23   |
| 0.38 | 986.80     | 3472.68    | 10113.55    | 32409.34    | 0.79 | 0.50   | 1.41   | 3.33   | 8.94    |
| 0.39 | 827.17     | 2897.66    | 8357.54     | 26077.70    | 0.80 | 0.40   | 1.09   | 2.61   | 6.73    |
| 0.40 | 686.30     | 2460.01    | 6780.27     | 22075.22    | 0.81 | 0.32   | 0.84   | 1.97   | 5.11    |
| 0.41 | 571.95     | 2057.90    | 5665.08     | 18006.96    | 0.82 | 0.26   | 0.66   | 1.53   | 3.94    |
| 0.42 | 476.77     | 1704.64    | 4707.94     | 15510.16    | 0.83 | 0.21   | 0.51   | 1.15   | 2.85    |
| 0.43 | 399.23     | 1423.87    | 3892.85     | 12797.54    | 0.84 | 0.17   | 0.37   | 0.85   | 2.06    |
| 0.44 | 335.21     | 1181.65    | 3271.65     | 10543.17    | 0.85 | 0.14   | 0.29   | 0.62   | 1.49    |
| 0.45 | 283.90     | 1000.26    | 2775.52     | 8993.76     | 0.86 | 0.12   | 0.22   | 0.45   | 1.07    |
| 0.46 | 241.03     | 839.48     | 2380.59     | 7380.61     | 0.87 | 0.10   | 0.18   | 0.34   | 0.78    |
| 0.47 | 203.16     | 707.44     | 2030.71     | 6419.80     | 0.88 | 0.09   | 0.14   | 0.24   | 0.53    |
| 0.48 | 171.29     | 595.50     | 1711.32     | 5249.42     | 0.89 | 0.08   | 0.12   | 0.19   | 0.37    |
| 0.49 | 141.13     | 486.57     | 1384.35     | 4325.69     | 0.90 | 0.07   | 0.10   | 0.15   | 0.26    |
| 0.50 | 118.54     | 414.55     | 1170.34     | 3527.50     |      |        |        |        |         |

Table S226: Critical values for detector  $\hat{H}_{mov}^{m,0.3}$  with windows size  $n = 0.3$ , and FM-OLS and D-OLS estimation in a model with intercept. The number of integrated regressors is 2 and the highest power of  $x_{kt}$  is 3.

| m    | 90 %       | 95 %        | 97,5 %      | 99 %         | m    | 90 %   | 95 %    | 97,5 %  | 99 %     |
|------|------------|-------------|-------------|--------------|------|--------|---------|---------|----------|
| 0.10 | 5194388.62 | 20756764.30 | 64539518.98 | 234073252.76 | 0.51 | 390.76 | 1547.52 | 4755.74 | 16299.20 |
| 0.11 | 3389445.23 | 13162490.59 | 41989154.95 | 147595313.22 | 0.52 | 331.37 | 1312.95 | 3916.42 | 13403.03 |
| 0.12 | 2270231.98 | 8646797.62  | 27378970.72 | 98713751.61  | 0.53 | 278.56 | 1070.61 | 3234.35 | 11483.58 |
| 0.13 | 1524983.85 | 5894508.07  | 18287031.68 | 68576157.04  | 0.54 | 235.03 | 888.11  | 2729.11 | 9559.23  |
| 0.14 | 1039367.45 | 4150528.01  | 12907832.44 | 47937752.57  | 0.55 | 197.74 | 765.07  | 2281.05 | 8226.38  |
| 0.15 | 743930.44  | 2936670.02  | 9415710.51  | 34412261.80  | 0.56 | 164.50 | 624.09  | 1887.62 | 6694.24  |
| 0.16 | 544052.66  | 2140656.83  | 6738501.88  | 24290730.52  | 0.57 | 137.44 | 528.77  | 1575.30 | 5583.15  |
| 0.17 | 403405.25  | 1572981.89  | 4921210.94  | 18315980.34  | 0.58 | 116.25 | 442.27  | 1311.64 | 4756.55  |
| 0.18 | 304432.49  | 1190835.19  | 3868612.18  | 13673726.54  | 0.59 | 96.05  | 364.14  | 1104.23 | 4006.04  |
| 0.19 | 233837.12  | 918504.39   | 2851442.60  | 10536794.57  | 0.60 | 79.59  | 300.96  | 929.42  | 3194.50  |
| 0.20 | 178554.73  | 711545.50   | 2210955.51  | 8273144.78   | 0.61 | 65.56  | 253.72  | 765.63  | 2585.89  |
| 0.21 | 136660.03  | 538075.08   | 1688990.77  | 6403208.71   | 0.62 | 55.03  | 212.53  | 628.31  | 2102.29  |
| 0.22 | 105268.65  | 425463.87   | 1329508.20  | 4936491.04   | 0.63 | 46.44  | 173.99  | 519.12  | 1711.87  |
| 0.23 | 81646.71   | 324807.60   | 1008851.48  | 3884039.41   | 0.64 | 38.65  | 143.95  | 427.14  | 1429.36  |
| 0.24 | 65146.83   | 258250.30   | 821322.27   | 3015508.25   | 0.65 | 31.98  | 117.80  | 346.54  | 1128.32  |
| 0.25 | 52675.91   | 209308.99   | 666186.56   | 2335105.27   | 0.66 | 26.69  | 95.47   | 280.71  | 929.88   |
| 0.26 | 41714.63   | 169094.42   | 523694.05   | 1913005.67   | 0.67 | 22.03  | 79.61   | 231.03  | 733.70   |
| 0.27 | 33396.48   | 135167.74   | 426944.68   | 1552170.77   | 0.68 | 18.14  | 65.07   | 187.83  | 595.74   |
| 0.28 | 26774.00   | 108771.60   | 336667.97   | 1281827.81   | 0.69 | 14.90  | 52.39   | 153.23  | 490.14   |
| 0.29 | 21447.42   | 87744.73    | 276144.27   | 1016875.36   | 0.70 | 12.01  | 42.35   | 123.65  | 394.20   |
| 0.30 | 17707.10   | 71537.81    | 222532.67   | 825777.41    | 0.71 | 9.84   | 34.65   | 98.24   | 314.67   |
| 0.31 | 14529.30   | 57541.33    | 175775.57   | 670827.04    | 0.72 | 8.14   | 28.17   | 81.91   | 257.49   |
| 0.32 | 12047.81   | 47055.72    | 146973.72   | 556692.30    | 0.73 | 6.61   | 22.90   | 65.20   | 205.93   |
| 0.33 | 9905.99    | 38449.51    | 124468.68   | 454482.29    | 0.74 | 5.39   | 18.41   | 51.51   | 161.78   |
| 0.34 | 8142.37    | 32362.43    | 102654.82   | 375678.55    | 0.75 | 4.37   | 14.71   | 40.67   | 125.92   |
| 0.35 | 6755.84    | 26957.66    | 84169.14    | 300480.73    | 0.76 | 3.49   | 11.74   | 32.58   | 100.09   |
| 0.36 | 5593.90    | 22160.48    | 69011.17    | 238615.34    | 0.77 | 2.79   | 9.20    | 25.45   | 77.66    |
| 0.37 | 4667.74    | 18618.31    | 57184.64    | 191955.92    | 0.78 | 2.24   | 7.25    | 19.80   | 61.32    |
| 0.38 | 3868.39    | 15465.52    | 46794.78    | 156916.81    | 0.79 | 1.77   | 5.72    | 15.34   | 48.36    |
| 0.39 | 3252.44    | 12839.74    | 38421.50    | 130836.95    | 0.80 | 1.39   | 4.47    | 12.00   | 35.13    |
| 0.40 | 2715.75    | 10610.08    | 31511.92    | 108545.53    | 0.81 | 1.08   | 3.45    | 9.11    | 27.42    |
| 0.41 | 2239.61    | 8907.95     | 25995.97    | 91446.22     | 0.82 | 0.85   | 2.66    | 6.88    | 20.66    |
| 0.42 | 1870.47    | 7522.42     | 22331.42    | 78032.35     | 0.83 | 0.67   | 2.00    | 5.20    | 14.96    |
| 0.43 | 1578.61    | 6200.43     | 18688.54    | 66103.38     | 0.84 | 0.52   | 1.48    | 3.75    | 11.07    |
| 0.44 | 1336.99    | 5251.09     | 16029.34    | 55665.32     | 0.85 | 0.40   | 1.12    | 2.78    | 7.89     |
| 0.45 | 1104.41    | 4329.26     | 13293.92    | 46681.33     | 0.86 | 0.31   | 0.82    | 2.05    | 5.66     |
| 0.46 | 928.41     | 3674.28     | 11290.59    | 40114.29     | 0.87 | 0.23   | 0.61    | 1.46    | 3.98     |
| 0.47 | 789.37     | 3069.38     | 9532.62     | 32415.78     | 0.88 | 0.18   | 0.44    | 1.03    | 2.71     |
| 0.48 | 664.32     | 2545.58     | 7963.59     | 27382.09     | 0.89 | 0.13   | 0.31    | 0.72    | 1.89     |
| 0.49 | 551.85     | 2160.74     | 6877.11     | 22967.00     | 0.90 | 0.10   | 0.23    | 0.50    | 1.27     |
| 0.50 | 468.80     | 1821.90     | 5607.05     | 19714.08     |      |        |         |         |          |

Table S227: Critical values for detector  $\hat{H}_{mov}^{m,0.3}$  with windows size  $n = 0.3$ , and IM-OLS estimation in a model with intercept. The number of integrated regressors is 2 and the highest power of  $x_{kt}$  is 3.

| m    | 90 %       | 95 %       | 97,5 %      | 99 %        | m    | 90 %  | 95 %   | 97,5 % | 99 %    |
|------|------------|------------|-------------|-------------|------|-------|--------|--------|---------|
| 0.10 | 1335881.34 | 4510182.85 | 11940871.89 | 36812883.12 | 0.51 | 80.06 | 273.72 | 792.60 | 2280.71 |
| 0.11 | 830929.87  | 2717775.63 | 7425931.86  | 23220592.86 | 0.52 | 68.10 | 231.98 | 644.94 | 1891.92 |
| 0.12 | 549861.68  | 1839694.23 | 4991247.86  | 14873079.77 | 0.53 | 56.75 | 191.37 | 528.55 | 1609.39 |
| 0.13 | 367728.80  | 1242197.47 | 3507307.11  | 10077685.42 | 0.54 | 47.47 | 163.15 | 443.32 | 1349.39 |
| 0.14 | 254892.66  | 863243.40  | 2379431.74  | 7123284.92  | 0.55 | 40.20 | 136.54 | 368.28 | 1109.16 |
| 0.15 | 176631.53  | 614600.05  | 1699757.27  | 5142433.64  | 0.56 | 34.42 | 117.68 | 321.65 | 939.14  |
| 0.16 | 126449.09  | 430105.29  | 1186875.27  | 3884049.82  | 0.57 | 28.43 | 97.61  | 260.52 | 784.59  |
| 0.17 | 91900.56   | 305007.41  | 843682.36   | 2714061.60  | 0.58 | 23.96 | 81.16  | 221.64 | 670.86  |
| 0.18 | 67846.48   | 226470.33  | 640683.32   | 2024337.10  | 0.59 | 20.00 | 67.04  | 185.18 | 561.93  |
| 0.19 | 50419.81   | 173809.87  | 474887.05   | 1525401.75  | 0.60 | 17.11 | 56.85  | 155.92 | 488.32  |
| 0.20 | 38750.11   | 133854.64  | 359313.92   | 1170850.41  | 0.61 | 14.62 | 47.84  | 131.23 | 415.65  |
| 0.21 | 29600.98   | 100918.07  | 276987.99   | 876814.96   | 0.62 | 12.15 | 40.14  | 109.23 | 342.95  |
| 0.22 | 22226.98   | 77235.08   | 213619.97   | 666360.53   | 0.63 | 10.49 | 33.80  | 93.96  | 290.71  |
| 0.23 | 17678.93   | 59704.92   | 166348.94   | 504083.83   | 0.64 | 8.67  | 27.77  | 75.56  | 241.74  |
| 0.24 | 13598.63   | 47750.04   | 132256.60   | 413255.42   | 0.65 | 7.35  | 22.80  | 62.73  | 188.39  |
| 0.25 | 10833.91   | 37068.09   | 105566.36   | 324872.30   | 0.66 | 6.08  | 19.02  | 51.06  | 155.65  |
| 0.26 | 8616.23    | 29807.00   | 82913.00    | 267869.17   | 0.67 | 5.10  | 15.85  | 41.83  | 126.93  |
| 0.27 | 6898.71    | 23964.17   | 66418.87    | 211277.57   | 0.68 | 4.30  | 12.87  | 34.21  | 107.90  |
| 0.28 | 5495.27    | 19114.96   | 52821.01    | 165011.43   | 0.69 | 3.67  | 10.78  | 27.91  | 85.09   |
| 0.29 | 4368.96    | 15547.60   | 42289.43    | 133558.84   | 0.70 | 3.03  | 8.82   | 23.25  | 67.24   |
| 0.30 | 3611.73    | 12197.06   | 34099.13    | 107658.78   | 0.71 | 2.55  | 7.45   | 19.45  | 57.40   |
| 0.31 | 2917.79    | 10004.46   | 27978.94    | 90182.09    | 0.72 | 2.17  | 6.29   | 16.12  | 46.35   |
| 0.32 | 2373.29    | 8121.04    | 22976.42    | 74540.69    | 0.73 | 1.78  | 5.08   | 12.93  | 35.66   |
| 0.33 | 1968.93    | 6811.25    | 19021.59    | 62120.64    | 0.74 | 1.47  | 4.07   | 10.23  | 28.58   |
| 0.34 | 1618.11    | 5526.58    | 15613.94    | 50606.09    | 0.75 | 1.22  | 3.37   | 8.23   | 22.59   |
| 0.35 | 1349.02    | 4593.26    | 12686.91    | 41289.46    | 0.76 | 1.00  | 2.72   | 6.80   | 18.63   |
| 0.36 | 1110.43    | 3755.18    | 10419.62    | 33859.15    | 0.77 | 0.83  | 2.21   | 5.44   | 14.94   |
| 0.37 | 919.85     | 3103.60    | 8470.83     | 26804.61    | 0.78 | 0.67  | 1.72   | 4.38   | 11.81   |
| 0.38 | 767.60     | 2588.22    | 7291.17     | 23298.20    | 0.79 | 0.55  | 1.40   | 3.27   | 8.94    |
| 0.39 | 642.87     | 2177.57    | 6054.36     | 19152.58    | 0.80 | 0.44  | 1.11   | 2.60   | 6.72    |
| 0.40 | 531.20     | 1821.75    | 5085.35     | 15714.31    | 0.81 | 0.36  | 0.85   | 1.97   | 5.23    |
| 0.41 | 444.21     | 1537.80    | 4252.70     | 13353.21    | 0.82 | 0.29  | 0.68   | 1.54   | 4.02    |
| 0.42 | 373.80     | 1271.74    | 3498.81     | 11436.08    | 0.83 | 0.23  | 0.52   | 1.17   | 2.89    |
| 0.43 | 317.25     | 1096.32    | 2910.94     | 9346.60     | 0.84 | 0.18  | 0.39   | 0.88   | 2.13    |
| 0.44 | 261.93     | 899.53     | 2475.95     | 7782.51     | 0.85 | 0.14  | 0.30   | 0.63   | 1.56    |
| 0.45 | 219.49     | 759.90     | 2135.62     | 6687.48     | 0.86 | 0.11  | 0.23   | 0.47   | 1.11    |
| 0.46 | 187.80     | 641.50     | 1760.86     | 5535.54     | 0.87 | 0.09  | 0.17   | 0.34   | 0.80    |
| 0.47 | 157.28     | 543.60     | 1507.71     | 4859.32     | 0.88 | 0.07  | 0.12   | 0.24   | 0.54    |
| 0.48 | 133.46     | 461.13     | 1277.39     | 4073.73     | 0.89 | 0.05  | 0.09   | 0.17   | 0.38    |
| 0.49 | 110.64     | 375.23     | 1066.87     | 3267.91     | 0.90 | 0.04  | 0.06   | 0.11   | 0.24    |
| 0.50 | 93.60      | 319.71     | 901.14      | 2663.51     |      |       |        |        |         |

Table S228: Critical values for detector  $\hat{H}_{mov}^{m,0.1}$  with windows size  $n = 0.1$ , and FM-OLS and D-OLS estimation in a model with intercept and linear trend. The number of integrated regressors is 2 and the highest power of  $x_{kt}$  is 3.

| m    | 90 %       | 95 %        | 97,5 %      | 99 %         | m    | 90 %   | 95 %    | 97,5 %  | 99 %     |
|------|------------|-------------|-------------|--------------|------|--------|---------|---------|----------|
| 0.10 | 4687575.89 | 16560623.38 | 48977254.61 | 166994896.28 | 0.51 | 266.63 | 1022.68 | 3065.96 | 10185.12 |
| 0.11 | 2969631.79 | 10565158.57 | 30569929.85 | 104274384.79 | 0.52 | 222.59 | 850.45  | 2517.65 | 8612.20  |
| 0.12 | 1921239.78 | 6922413.44  | 20568336.66 | 66299056.20  | 0.53 | 184.85 | 711.84  | 2103.36 | 7089.54  |
| 0.13 | 1303616.43 | 4600578.47  | 13773612.97 | 47761488.21  | 0.54 | 157.63 | 599.42  | 1777.63 | 6055.27  |
| 0.14 | 876060.05  | 3124197.95  | 9315492.94  | 34012183.35  | 0.55 | 133.68 | 504.39  | 1489.30 | 5075.80  |
| 0.15 | 603699.34  | 2189457.67  | 6690117.25  | 22696038.85  | 0.56 | 114.47 | 431.92  | 1274.13 | 4116.02  |
| 0.16 | 442800.29  | 1593961.80  | 4728692.47  | 16224578.99  | 0.57 | 95.87  | 361.83  | 1056.68 | 3467.33  |
| 0.17 | 318806.73  | 1130543.20  | 3317234.38  | 11986221.79  | 0.58 | 80.64  | 302.53  | 871.63  | 3008.09  |
| 0.18 | 234207.99  | 854503.69   | 2458688.37  | 8537175.04   | 0.59 | 68.52  | 251.77  | 746.07  | 2511.24  |
| 0.19 | 173740.02  | 631693.21   | 1869970.66  | 6549050.25   | 0.60 | 57.03  | 212.54  | 626.03  | 2059.53  |
| 0.20 | 131749.57  | 492710.69   | 1457221.03  | 5119729.99   | 0.61 | 47.72  | 176.47  | 533.62  | 1710.90  |
| 0.21 | 99927.04   | 373324.57   | 1087771.20  | 3879625.27   | 0.62 | 40.14  | 148.36  | 434.16  | 1435.69  |
| 0.22 | 78013.64   | 292068.53   | 844478.19   | 2991114.66   | 0.63 | 33.93  | 126.39  | 363.63  | 1220.35  |
| 0.23 | 59829.58   | 225930.69   | 680797.94   | 2214715.83   | 0.64 | 28.31  | 106.66  | 304.40  | 1015.92  |
| 0.24 | 47725.87   | 179475.16   | 545322.40   | 1879846.29   | 0.65 | 23.74  | 87.06   | 249.23  | 814.20   |
| 0.25 | 37663.76   | 141818.71   | 424592.30   | 1430594.71   | 0.66 | 19.77  | 70.11   | 208.84  | 660.22   |
| 0.26 | 29773.74   | 113618.86   | 335136.07   | 1171867.20   | 0.67 | 16.47  | 57.79   | 172.15  | 534.49   |
| 0.27 | 23545.99   | 91668.42    | 275898.04   | 946670.68    | 0.68 | 13.69  | 47.92   | 141.28  | 440.90   |
| 0.28 | 18968.15   | 73417.85    | 220637.91   | 754447.29    | 0.69 | 11.51  | 39.03   | 116.67  | 364.97   |
| 0.29 | 15208.55   | 57719.18    | 175983.76   | 608451.37    | 0.70 | 9.53   | 32.24   | 96.73   | 301.26   |
| 0.30 | 12377.72   | 45754.32    | 138432.66   | 481279.16    | 0.71 | 7.92   | 26.68   | 77.92   | 244.17   |
| 0.31 | 10205.83   | 37041.95    | 110328.75   | 393169.69    | 0.72 | 6.68   | 22.19   | 63.88   | 197.23   |
| 0.32 | 8367.81    | 29978.95    | 92239.81    | 324984.61    | 0.73 | 5.58   | 18.47   | 51.92   | 158.10   |
| 0.33 | 6791.62    | 24831.54    | 75913.33    | 261335.27    | 0.74 | 4.55   | 14.92   | 40.63   | 124.32   |
| 0.34 | 5631.72    | 20833.39    | 64183.95    | 219289.01    | 0.75 | 3.70   | 11.96   | 32.38   | 101.31   |
| 0.35 | 4669.92    | 16959.42    | 52904.42    | 180276.97    | 0.76 | 2.98   | 9.60    | 25.67   | 80.55    |
| 0.36 | 3834.65    | 14053.10    | 42594.53    | 144100.35    | 0.77 | 2.42   | 7.70    | 20.43   | 63.36    |
| 0.37 | 3171.15    | 11737.04    | 34553.00    | 119045.00    | 0.78 | 1.98   | 6.22    | 16.27   | 49.46    |
| 0.38 | 2700.49    | 9847.13     | 28646.08    | 101715.01    | 0.79 | 1.58   | 4.89    | 12.87   | 38.36    |
| 0.39 | 2204.35    | 8315.91     | 24093.80    | 84661.07     | 0.80 | 1.26   | 3.90    | 10.06   | 29.76    |
| 0.40 | 1832.26    | 6929.00     | 20428.67    | 70497.87     | 0.81 | 1.02   | 3.02    | 7.76    | 23.02    |
| 0.41 | 1510.76    | 5714.52     | 17195.17    | 59336.55     | 0.82 | 0.81   | 2.33    | 6.18    | 17.63    |
| 0.42 | 1269.47    | 4667.40     | 14277.08    | 49054.61     | 0.83 | 0.64   | 1.78    | 4.59    | 13.12    |
| 0.43 | 1042.74    | 3926.95     | 11990.83    | 41666.94     | 0.84 | 0.51   | 1.34    | 3.33    | 9.25     |
| 0.44 | 887.93     | 3314.10     | 10012.12    | 34479.24     | 0.85 | 0.40   | 1.00    | 2.43    | 6.82     |
| 0.45 | 755.32     | 2789.20     | 8464.03     | 28842.15     | 0.86 | 0.31   | 0.74    | 1.72    | 4.83     |
| 0.46 | 636.96     | 2362.72     | 7129.99     | 24134.18     | 0.87 | 0.24   | 0.55    | 1.24    | 3.44     |
| 0.47 | 527.01     | 1977.70     | 5932.16     | 20492.67     | 0.88 | 0.18   | 0.40    | 0.90    | 2.37     |
| 0.48 | 445.98     | 1681.75     | 5131.55     | 16719.98     | 0.89 | 0.14   | 0.28    | 0.62    | 1.61     |
| 0.49 | 372.39     | 1421.38     | 4331.46     | 14355.06     | 0.90 | 0.10   | 0.20    | 0.43    | 1.06     |
| 0.50 | 314.02     | 1201.71     | 3630.79     | 12097.06     |      |        |         |         |          |

Table S229: Critical values for detector  $\hat{H}_{mov}^{m,0.1}$  with windows size  $n = 0.1$ , and IM-OLS estimation in a model with intercept and linear trend. The number of integrated regressors is 2 and the highest power of  $x_{kt}$  is 3.

| m    | 90 %       | 95 %       | 97,5 %      | 99 %        | m    | 90 %   | 95 %   | 97,5 %  | 99 %    |
|------|------------|------------|-------------|-------------|------|--------|--------|---------|---------|
| 0.10 | 1753975.15 | 6006697.84 | 16333745.08 | 50651381.18 | 0.51 | 103.95 | 353.47 | 1015.40 | 2905.78 |
| 0.11 | 1093115.50 | 3637490.91 | 10235981.30 | 31606734.73 | 0.52 | 88.62  | 297.90 | 840.48  | 2416.62 |
| 0.12 | 729619.65  | 2469078.36 | 6834462.46  | 20624964.60 | 0.53 | 73.66  | 248.85 | 679.90  | 2080.04 |
| 0.13 | 487771.98  | 1669776.37 | 4847257.15  | 14084320.98 | 0.54 | 61.54  | 211.57 | 574.73  | 1726.56 |
| 0.14 | 338609.26  | 1164657.64 | 3260730.37  | 9885338.20  | 0.55 | 51.83  | 175.78 | 473.88  | 1413.56 |
| 0.15 | 236697.90  | 834180.30  | 2340132.69  | 7168388.64  | 0.56 | 44.22  | 150.33 | 413.39  | 1182.05 |
| 0.16 | 168185.61  | 585122.83  | 1636232.40  | 5412499.99  | 0.57 | 36.77  | 123.60 | 331.33  | 979.87  |
| 0.17 | 122757.77  | 415242.14  | 1161017.88  | 3772256.33  | 0.58 | 30.61  | 103.37 | 281.94  | 839.11  |
| 0.18 | 91509.94   | 309630.88  | 894164.70   | 2849136.20  | 0.59 | 25.24  | 84.91  | 234.16  | 696.77  |
| 0.19 | 68448.82   | 239041.56  | 655521.84   | 2163034.40  | 0.60 | 21.52  | 71.81  | 198.05  | 602.65  |
| 0.20 | 51890.34   | 182094.77  | 496941.16   | 1613470.95  | 0.61 | 18.37  | 59.70  | 162.96  | 508.83  |
| 0.21 | 39770.13   | 138116.11  | 380408.65   | 1229126.41  | 0.62 | 15.28  | 49.70  | 134.36  | 413.44  |
| 0.22 | 29973.94   | 106173.40  | 293378.12   | 940260.06   | 0.63 | 13.08  | 42.37  | 114.13  | 351.18  |
| 0.23 | 24132.16   | 82077.47   | 231588.36   | 716006.44   | 0.64 | 10.75  | 33.88  | 90.94   | 288.63  |
| 0.24 | 18442.23   | 65632.42   | 182251.90   | 579425.05   | 0.65 | 8.94   | 27.53  | 74.81   | 227.52  |
| 0.25 | 14613.99   | 50673.93   | 144514.15   | 458644.92   | 0.66 | 7.42   | 23.00  | 61.01   | 185.77  |
| 0.26 | 11616.43   | 41128.03   | 114450.81   | 369127.74   | 0.67 | 6.23   | 18.94  | 49.78   | 148.06  |
| 0.27 | 9412.11    | 33055.64   | 91746.00    | 298063.38   | 0.68 | 5.20   | 15.27  | 40.60   | 124.33  |
| 0.28 | 7403.28    | 26362.68   | 72799.77    | 231443.35   | 0.69 | 4.43   | 12.66  | 33.12   | 99.08   |
| 0.29 | 5926.62    | 21341.29   | 58770.01    | 186468.93   | 0.70 | 3.63   | 10.30  | 26.90   | 77.08   |
| 0.30 | 4850.16    | 16782.81   | 47135.10    | 151605.97   | 0.71 | 3.02   | 8.73   | 22.30   | 65.01   |
| 0.31 | 3923.16    | 13675.00   | 38876.11    | 124428.79   | 0.72 | 2.56   | 7.27   | 18.27   | 51.43   |
| 0.32 | 3178.09    | 11055.19   | 31451.52    | 103436.82   | 0.73 | 2.07   | 5.82   | 14.55   | 40.02   |
| 0.33 | 2650.16    | 9280.15    | 26125.25    | 85741.03    | 0.74 | 1.71   | 4.61   | 11.41   | 31.74   |
| 0.34 | 2193.65    | 7465.75    | 21384.65    | 70179.43    | 0.75 | 1.40   | 3.77   | 9.14    | 24.43   |
| 0.35 | 1813.48    | 6212.29    | 17344.30    | 57503.35    | 0.76 | 1.14   | 3.04   | 7.43    | 20.03   |
| 0.36 | 1495.36    | 5087.87    | 14367.63    | 46373.48    | 0.77 | 0.94   | 2.45   | 5.85    | 16.00   |
| 0.37 | 1235.85    | 4224.54    | 11395.43    | 36785.88    | 0.78 | 0.75   | 1.89   | 4.72    | 12.57   |
| 0.38 | 1030.64    | 3518.82    | 9839.63     | 31876.36    | 0.79 | 0.61   | 1.51   | 3.49    | 9.38    |
| 0.39 | 857.38     | 2949.04    | 8160.99     | 25840.83    | 0.80 | 0.48   | 1.18   | 2.75    | 6.99    |
| 0.40 | 709.20     | 2461.69    | 6749.92     | 21515.92    | 0.81 | 0.39   | 0.89   | 2.06    | 5.48    |
| 0.41 | 591.37     | 2057.35    | 5720.55     | 17803.78    | 0.82 | 0.31   | 0.71   | 1.61    | 4.17    |
| 0.42 | 499.38     | 1705.60    | 4689.34     | 15220.32    | 0.83 | 0.24   | 0.54   | 1.21    | 2.95    |
| 0.43 | 419.16     | 1462.36    | 3889.17     | 12440.65    | 0.84 | 0.19   | 0.40   | 0.90    | 2.17    |
| 0.44 | 348.78     | 1203.24    | 3301.54     | 10356.86    | 0.85 | 0.15   | 0.31   | 0.64    | 1.58    |
| 0.45 | 291.19     | 1009.41    | 2871.79     | 8816.17     | 0.86 | 0.12   | 0.23   | 0.47    | 1.12    |
| 0.46 | 248.01     | 850.08     | 2322.51     | 7228.32     | 0.87 | 0.09   | 0.17   | 0.35    | 0.80    |
| 0.47 | 207.84     | 712.23     | 2011.90     | 6406.08     | 0.88 | 0.07   | 0.13   | 0.24    | 0.54    |
| 0.48 | 174.81     | 605.72     | 1700.92     | 5298.19     | 0.89 | 0.06   | 0.09   | 0.17    | 0.38    |
| 0.49 | 144.99     | 490.70     | 1401.80     | 4296.81     | 0.90 | 0.04   | 0.07   | 0.12    | 0.25    |
| 0.50 | 122.46     | 421.09     | 1177.79     | 3495.23     |      |        |        |         |         |

Table S230: Critical values for detector  $\hat{H}_{mov}^{m,0.2}$  with windows size  $n = 0.2$ , and FM-OLS and D-OLS estimation in a model with intercept and linear trend. The number of integrated regressors is 2 and the highest power of  $x_{kt}$  is 3.

| m    | 90 %       | 95 %        | 97,5 %      | 99 %         | m    | 90 %   | 95 %    | 97,5 %  | 99 %     |
|------|------------|-------------|-------------|--------------|------|--------|---------|---------|----------|
| 0.10 | 6155216.61 | 22138288.02 | 65555547.68 | 227934214.28 | 0.51 | 346.58 | 1329.95 | 3986.68 | 13154.11 |
| 0.11 | 3950020.17 | 14148582.15 | 41043267.02 | 143669748.49 | 0.52 | 285.93 | 1106.03 | 3209.14 | 10791.15 |
| 0.12 | 2554872.80 | 9291939.50  | 27840208.84 | 89798698.03  | 0.53 | 240.90 | 917.21  | 2695.22 | 9097.70  |
| 0.13 | 1725007.18 | 6232444.46  | 18858278.20 | 66038172.66  | 0.54 | 202.79 | 773.95  | 2298.28 | 7823.54  |
| 0.14 | 1157111.31 | 4237103.70  | 12769615.72 | 47557904.74  | 0.55 | 172.47 | 642.30  | 1902.63 | 6599.37  |
| 0.15 | 803899.95  | 2961256.80  | 9142282.83  | 32051291.65  | 0.56 | 146.38 | 550.31  | 1628.52 | 5331.37  |
| 0.16 | 590528.74  | 2155091.30  | 6476696.71  | 22508519.76  | 0.57 | 121.81 | 456.34  | 1343.80 | 4405.94  |
| 0.17 | 423593.74  | 1552721.52  | 4553184.23  | 16415888.47  | 0.58 | 102.30 | 380.18  | 1112.84 | 3793.56  |
| 0.18 | 312379.58  | 1170950.29  | 3398157.45  | 11887585.09  | 0.59 | 86.55  | 313.30  | 930.25  | 3142.01  |
| 0.19 | 232018.02  | 859993.34   | 2554915.67  | 9160014.49   | 0.60 | 71.53  | 264.32  | 780.94  | 2570.91  |
| 0.20 | 176210.29  | 669791.96   | 2001256.07  | 7023961.65   | 0.61 | 59.83  | 218.56  | 656.15  | 2088.33  |
| 0.21 | 133999.77  | 514381.65   | 1503430.05  | 5464297.63   | 0.62 | 50.13  | 184.18  | 535.77  | 1744.16  |
| 0.22 | 103546.18  | 393915.83   | 1179168.94  | 4183085.50   | 0.63 | 42.07  | 156.21  | 450.01  | 1478.99  |
| 0.23 | 80918.17   | 304483.04   | 934098.59   | 3136707.23   | 0.64 | 35.04  | 129.90  | 366.19  | 1212.43  |
| 0.24 | 64011.34   | 245629.64   | 744605.69   | 2602519.72   | 0.65 | 29.26  | 105.85  | 299.56  | 967.09   |
| 0.25 | 50579.22   | 194008.13   | 584828.53   | 1972467.08   | 0.66 | 24.17  | 84.80   | 249.96  | 779.22   |
| 0.26 | 40277.87   | 154692.13   | 455227.94   | 1625157.98   | 0.67 | 19.93  | 69.67   | 203.73  | 627.16   |
| 0.27 | 31864.95   | 124911.57   | 381507.06   | 1331243.34   | 0.68 | 16.60  | 57.19   | 165.57  | 511.16   |
| 0.28 | 25651.06   | 99668.50    | 303860.58   | 1050366.84   | 0.69 | 13.82  | 46.32   | 137.08  | 420.79   |
| 0.29 | 20481.19   | 78889.81    | 241522.64   | 851483.15    | 0.70 | 11.40  | 37.32   | 111.59  | 344.85   |
| 0.30 | 16756.02   | 62392.34    | 190194.14   | 664064.26    | 0.71 | 9.35   | 30.99   | 90.25   | 277.22   |
| 0.31 | 13755.08   | 50548.06    | 150363.10   | 536323.63    | 0.72 | 7.79   | 25.46   | 73.18   | 224.93   |
| 0.32 | 11241.77   | 40935.91    | 124879.69   | 446540.05    | 0.73 | 6.48   | 21.05   | 58.96   | 176.21   |
| 0.33 | 9136.68    | 33593.37    | 103531.18   | 359386.42    | 0.74 | 5.27   | 16.99   | 46.23   | 139.93   |
| 0.34 | 7519.20    | 28224.20    | 88136.05    | 299577.60    | 0.75 | 4.23   | 13.56   | 36.26   | 111.02   |
| 0.35 | 6260.86    | 22950.12    | 72103.71    | 247567.07    | 0.76 | 3.43   | 10.67   | 28.15   | 87.47    |
| 0.36 | 5155.55    | 18985.85    | 58258.96    | 191917.93    | 0.77 | 2.74   | 8.44    | 22.47   | 67.91    |
| 0.37 | 4252.30    | 15765.31    | 46377.64    | 165083.87    | 0.78 | 2.20   | 6.79    | 17.65   | 52.58    |
| 0.38 | 3589.70    | 13181.68    | 38619.28    | 138968.34    | 0.79 | 1.76   | 5.30    | 13.81   | 40.65    |
| 0.39 | 2947.23    | 11081.02    | 32857.34    | 115053.35    | 0.80 | 1.38   | 4.15    | 10.63   | 31.31    |
| 0.40 | 2450.98    | 9285.77     | 27635.58    | 96776.04     | 0.81 | 1.11   | 3.21    | 8.13    | 24.01    |
| 0.41 | 2018.44    | 7652.72     | 23029.98    | 81239.46     | 0.82 | 0.87   | 2.45    | 6.44    | 18.36    |
| 0.42 | 1677.77    | 6241.20     | 19125.70    | 66979.64     | 0.83 | 0.68   | 1.86    | 4.75    | 13.51    |
| 0.43 | 1389.49    | 5210.37     | 15774.20    | 55179.10     | 0.84 | 0.53   | 1.38    | 3.42    | 9.49     |
| 0.44 | 1179.20    | 4430.02     | 13419.45    | 45632.75     | 0.85 | 0.42   | 1.03    | 2.48    | 6.92     |
| 0.45 | 994.41     | 3718.60     | 11132.80    | 38435.21     | 0.86 | 0.32   | 0.76    | 1.75    | 4.89     |
| 0.46 | 836.72     | 3116.31     | 9339.09     | 32017.10     | 0.87 | 0.24   | 0.55    | 1.25    | 3.45     |
| 0.47 | 698.42     | 2593.07     | 7821.19     | 26974.35     | 0.88 | 0.18   | 0.41    | 0.91    | 2.38     |
| 0.48 | 583.66     | 2209.93     | 6778.43     | 22071.86     | 0.89 | 0.14   | 0.29    | 0.62    | 1.62     |
| 0.49 | 491.20     | 1858.71     | 5647.31     | 18511.89     | 0.90 | 0.10   | 0.21    | 0.43    | 1.07     |
| 0.50 | 410.35     | 1560.74     | 4713.90     | 15849.09     |      |        |         |         |          |

Table S231: Critical values for detector  $\hat{H}_{mov}^{m,0.2}$  with windows size  $n = 0.2$ , and IM-OLS estimation in a model with intercept and linear trend. The number of integrated regressors is 2 and the highest power of  $x_{kt}$  is 3.



| m    | 90 %       | 95 %       | 97,5 %      | 99 %        | m    | 90 %   | 95 %   | 97,5 %  | 99 %    |
|------|------------|------------|-------------|-------------|------|--------|--------|---------|---------|
| 0.10 | 1886805.79 | 6496560.64 | 17850624.32 | 55093404.99 | 0.51 | 109.72 | 373.81 | 1061.85 | 3033.25 |
| 0.11 | 1187118.28 | 3949522.41 | 11262834.61 | 35152855.87 | 0.52 | 93.45  | 314.80 | 879.29  | 2544.99 |
| 0.12 | 782709.20  | 2674156.20 | 7540136.68  | 22675498.21 | 0.53 | 77.57  | 259.70 | 711.47  | 2175.49 |
| 0.13 | 525905.95  | 1793709.42 | 5256506.56  | 15568246.20 | 0.54 | 64.87  | 221.20 | 599.22  | 1795.01 |
| 0.14 | 365934.22  | 1270623.77 | 3591013.04  | 10901804.24 | 0.55 | 54.28  | 183.42 | 493.62  | 1480.30 |
| 0.15 | 254652.12  | 904762.26  | 2570751.50  | 7888981.12  | 0.56 | 46.10  | 157.61 | 430.41  | 1223.66 |
| 0.16 | 182134.78  | 633777.53  | 1778066.20  | 5938310.03  | 0.57 | 38.42  | 128.68 | 343.88  | 1020.51 |
| 0.17 | 132926.63  | 451219.91  | 1274022.18  | 4160144.89  | 0.58 | 31.98  | 106.94 | 291.39  | 863.48  |
| 0.18 | 98869.92   | 338628.38  | 974287.88   | 3111057.60  | 0.59 | 26.33  | 87.68  | 239.89  | 716.53  |
| 0.19 | 74065.00   | 258492.68  | 713834.31   | 2381715.26  | 0.60 | 22.34  | 74.50  | 204.09  | 620.15  |
| 0.20 | 56040.50   | 198029.54  | 545073.65   | 1770007.07  | 0.61 | 18.98  | 61.63  | 168.02  | 524.37  |
| 0.21 | 42938.32   | 149408.34  | 417364.36   | 1345560.16  | 0.62 | 15.83  | 51.13  | 137.27  | 423.83  |
| 0.22 | 32288.14   | 115520.16  | 321578.76   | 1025335.02  | 0.63 | 13.50  | 43.83  | 116.15  | 356.88  |
| 0.23 | 26075.74   | 89441.09   | 253322.70   | 792825.81   | 0.64 | 11.06  | 34.65  | 92.63   | 292.86  |
| 0.24 | 20032.32   | 71235.07   | 198724.03   | 637303.52   | 0.65 | 9.16   | 28.04  | 75.97   | 232.13  |
| 0.25 | 15828.40   | 55258.59   | 157999.79   | 509300.38   | 0.66 | 7.59   | 23.38  | 61.73   | 186.91  |
| 0.26 | 12509.76   | 44860.24   | 123777.30   | 402069.51   | 0.67 | 6.34   | 19.23  | 50.56   | 149.22  |
| 0.27 | 10156.61   | 35823.86   | 100652.30   | 327262.48   | 0.68 | 5.29   | 15.52  | 40.78   | 124.93  |
| 0.28 | 7992.29    | 28558.99   | 79276.40    | 251420.10   | 0.69 | 4.50   | 12.81  | 33.35   | 99.49   |
| 0.29 | 6401.50    | 22914.54   | 63645.07    | 201592.21   | 0.70 | 3.68   | 10.40  | 27.07   | 77.54   |
| 0.30 | 5214.05    | 18167.23   | 51052.77    | 163808.25   | 0.71 | 3.05   | 8.77   | 22.37   | 65.18   |
| 0.31 | 4243.96    | 14791.56   | 42399.12    | 136341.05   | 0.72 | 2.59   | 7.32   | 18.33   | 51.56   |
| 0.32 | 3432.87    | 11993.85   | 34088.35    | 111327.24   | 0.73 | 2.09   | 5.85   | 14.57   | 40.16   |
| 0.33 | 2860.49    | 10051.31   | 28331.08    | 92458.62    | 0.74 | 1.71   | 4.63   | 11.44   | 31.74   |
| 0.34 | 2357.99    | 8033.07    | 23311.79    | 76118.89    | 0.75 | 1.41   | 3.78   | 9.15    | 24.46   |
| 0.35 | 1958.91    | 6695.03    | 18835.31    | 62005.65    | 0.76 | 1.15   | 3.04   | 7.43    | 20.04   |
| 0.36 | 1609.81    | 5522.69    | 15431.44    | 50749.81    | 0.77 | 0.94   | 2.46   | 5.85    | 16.00   |
| 0.37 | 1329.44    | 4544.26    | 12390.87    | 39530.59    | 0.78 | 0.76   | 1.89   | 4.72    | 12.57   |
| 0.38 | 1102.65    | 3783.53    | 10538.52    | 34369.01    | 0.79 | 0.61   | 1.51   | 3.49    | 9.38    |
| 0.39 | 920.18     | 3163.41    | 8844.33     | 27577.09    | 0.80 | 0.48   | 1.19   | 2.75    | 6.99    |
| 0.40 | 762.24     | 2642.48    | 7295.56     | 23234.47    | 0.81 | 0.39   | 0.90   | 2.07    | 5.49    |
| 0.41 | 635.57     | 2195.79    | 6202.86     | 19058.75    | 0.82 | 0.31   | 0.71   | 1.61    | 4.17    |
| 0.42 | 533.87     | 1833.47    | 5027.41     | 16223.82    | 0.83 | 0.25   | 0.54   | 1.21    | 2.95    |
| 0.43 | 449.44     | 1560.44    | 4163.19     | 13335.89    | 0.84 | 0.19   | 0.41   | 0.90    | 2.18    |
| 0.44 | 372.28     | 1278.86    | 3521.15     | 10952.17    | 0.85 | 0.16   | 0.31   | 0.65    | 1.58    |
| 0.45 | 310.68     | 1076.37    | 3048.94     | 9296.11     | 0.86 | 0.12   | 0.23   | 0.48    | 1.12    |
| 0.46 | 264.58     | 900.83     | 2481.95     | 7657.89     | 0.87 | 0.10   | 0.18   | 0.35    | 0.80    |
| 0.47 | 220.35     | 758.23     | 2128.11     | 6783.18     | 0.88 | 0.08   | 0.13   | 0.25    | 0.55    |
| 0.48 | 186.25     | 640.35     | 1794.17     | 5595.42     | 0.89 | 0.06   | 0.10   | 0.17    | 0.38    |
| 0.49 | 154.18     | 517.33     | 1473.71     | 4536.24     | 0.90 | 0.05   | 0.08   | 0.12    | 0.25    |
| 0.50 | 129.71     | 445.43     | 1231.16     | 3724.52     |      |        |        |         |         |

Table S232: Critical values for detector  $\hat{H}_{mov}^{m,0.3}$  with windows size  $n = 0.3$ , and FM-OLS and D-OLS estimation in a model with intercept and linear trend. The number of integrated regressors is 2 and the highest power of  $x_{kt}$  is 3.

| m    | 90 %       | 95 %        | 97,5 %      | 99 %         | m    | 90 %   | 95 %    | 97,5 %  | 99 %     |
|------|------------|-------------|-------------|--------------|------|--------|---------|---------|----------|
| 0.10 | 6633848.87 | 23917191.48 | 71201147.39 | 246908190.35 | 0.51 | 365.79 | 1398.46 | 4212.05 | 13810.58 |
| 0.11 | 4245664.65 | 15357003.36 | 45238822.56 | 159836469.89 | 0.52 | 300.85 | 1159.01 | 3353.83 | 11389.89 |
| 0.12 | 2766031.71 | 10126673.58 | 29841157.05 | 98247817.18  | 0.53 | 253.11 | 961.51  | 2829.06 | 9537.54  |
| 0.13 | 1851145.13 | 6747341.24  | 20840886.16 | 72631977.59  | 0.54 | 212.43 | 807.94  | 2400.67 | 8158.55  |
| 0.14 | 1245521.06 | 4598213.98  | 13868823.57 | 52045926.86  | 0.55 | 180.90 | 672.24  | 1983.76 | 6813.43  |
| 0.15 | 867807.04  | 3209560.03  | 9910850.59  | 35211606.74  | 0.56 | 152.52 | 572.50  | 1691.82 | 5549.42  |
| 0.16 | 633520.05  | 2332693.35  | 7074089.37  | 24701257.60  | 0.57 | 127.62 | 473.70  | 1390.02 | 4570.85  |
| 0.17 | 455788.20  | 1689739.72  | 4929354.42  | 17811769.56  | 0.58 | 106.61 | 392.59  | 1148.28 | 3930.03  |
| 0.18 | 338376.59  | 1270099.48  | 3725413.72  | 13013289.25  | 0.59 | 90.15  | 325.60  | 963.11  | 3235.08  |
| 0.19 | 249849.41  | 927696.11   | 2783404.45  | 10064587.85  | 0.60 | 74.53  | 273.28  | 802.50  | 2629.04  |
| 0.20 | 190252.79  | 727666.30   | 2206650.83  | 7742310.79   | 0.61 | 61.81  | 225.87  | 671.91  | 2127.79  |
| 0.21 | 144123.53  | 558347.17   | 1644355.99  | 6002820.24   | 0.62 | 51.77  | 189.45  | 548.99  | 1789.67  |
| 0.22 | 111688.42  | 427051.37   | 1279146.26  | 4558786.13   | 0.63 | 43.39  | 160.39  | 458.64  | 1507.49  |
| 0.23 | 87015.18   | 330087.78   | 1016672.40  | 3456950.78   | 0.64 | 36.03  | 132.09  | 373.09  | 1234.14  |
| 0.24 | 69174.78   | 266243.13   | 805375.38   | 2823488.53   | 0.65 | 30.08  | 107.98  | 304.44  | 987.74   |
| 0.25 | 54681.08   | 211329.50   | 644677.79   | 2159808.15   | 0.66 | 24.72  | 86.41   | 253.87  | 788.14   |
| 0.26 | 43408.75   | 168033.83   | 497505.25   | 1765378.27   | 0.67 | 20.32  | 70.61   | 206.73  | 636.33   |
| 0.27 | 34407.02   | 134948.79   | 418426.73   | 1450723.51   | 0.68 | 16.86  | 57.90   | 166.83  | 514.63   |
| 0.28 | 27600.90   | 108156.53   | 330938.69   | 1156807.18   | 0.69 | 14.04  | 46.84   | 138.83  | 424.44   |
| 0.29 | 22042.85   | 85981.42    | 261418.45   | 925070.00    | 0.70 | 11.57  | 37.72   | 112.79  | 346.63   |
| 0.30 | 18049.42   | 67400.84    | 206083.37   | 716335.78    | 0.71 | 9.47   | 31.22   | 90.58   | 279.28   |
| 0.31 | 14730.04   | 54739.11    | 164102.48   | 585394.14    | 0.72 | 7.87   | 25.63   | 73.49   | 226.41   |
| 0.32 | 12067.69   | 44634.30    | 134590.24   | 490226.95    | 0.73 | 6.53   | 21.11   | 59.14   | 176.63   |
| 0.33 | 9835.62    | 36459.44    | 112124.31   | 389118.53    | 0.74 | 5.29   | 17.03   | 46.37   | 140.01   |
| 0.34 | 8077.48    | 30476.25    | 95663.02    | 321610.22    | 0.75 | 4.25   | 13.61   | 36.32   | 111.14   |
| 0.35 | 6695.67    | 24925.17    | 78320.14    | 266368.41    | 0.76 | 3.44   | 10.68   | 28.18   | 87.48    |
| 0.36 | 5516.01    | 20347.82    | 62959.04    | 210556.23    | 0.77 | 2.74   | 8.45    | 22.47   | 67.93    |
| 0.37 | 4581.41    | 16942.01    | 50140.55    | 178562.69    | 0.78 | 2.21   | 6.79    | 17.66   | 52.58    |
| 0.38 | 3838.79    | 14152.80    | 41641.21    | 149649.82    | 0.79 | 1.76   | 5.31    | 13.81   | 40.65    |
| 0.39 | 3140.63    | 11912.08    | 35189.43    | 123195.82    | 0.80 | 1.39   | 4.15    | 10.63   | 31.31    |
| 0.40 | 2610.75    | 9941.63     | 29697.98    | 103497.67    | 0.81 | 1.11   | 3.21    | 8.13    | 24.01    |
| 0.41 | 2160.07    | 8170.27     | 24839.83    | 86739.51     | 0.82 | 0.87   | 2.46    | 6.44    | 18.36    |
| 0.42 | 1788.93    | 6675.52     | 20447.55    | 71487.23     | 0.83 | 0.68   | 1.86    | 4.75    | 13.51    |
| 0.43 | 1490.12    | 5525.74     | 16791.72    | 59360.00     | 0.84 | 0.54   | 1.38    | 3.43    | 9.50     |
| 0.44 | 1257.39    | 4725.54     | 14332.66    | 49091.74     | 0.85 | 0.42   | 1.03    | 2.48    | 6.92     |
| 0.45 | 1063.56    | 3956.81     | 11931.48    | 40858.40     | 0.86 | 0.32   | 0.76    | 1.75    | 4.89     |
| 0.46 | 888.33     | 3332.32     | 9869.76     | 34199.97     | 0.87 | 0.24   | 0.56    | 1.25    | 3.45     |
| 0.47 | 739.87     | 2756.22     | 8286.28     | 28554.98     | 0.88 | 0.19   | 0.41    | 0.91    | 2.38     |
| 0.48 | 621.81     | 2335.31     | 7197.42     | 23351.78     | 0.89 | 0.14   | 0.29    | 0.63    | 1.62     |
| 0.49 | 522.62     | 1954.36     | 5967.95     | 19601.60     | 0.90 | 0.11   | 0.21    | 0.43    | 1.07     |
| 0.50 | 435.18     | 1649.13     | 4977.80     | 16644.08     |      |        |         |         |          |

Table S233: Critical values for detector  $\hat{H}_{mov}^{m,0.3}$  with windows size  $n = 0.3$ , and IM-OLS estimation in a model with intercept and linear trend. The number of integrated regressors is 2 and the highest power of  $x_{kt}$  is 3.

### 4.3 Number of I(1) regressors: 3

| m    | 90 %   | 95 %   | 97,5 % | 99 %    | m    | 90 % | 95 % | 97,5 % | 99 % |
|------|--------|--------|--------|---------|------|------|------|--------|------|
| 0.10 | 349.11 | 569.98 | 860.42 | 1387.42 | 0.51 | 2.40 | 3.88 | 5.80   | 9.09 |
| 0.11 | 280.01 | 454.00 | 682.90 | 1083.09 | 0.52 | 2.18 | 3.54 | 5.26   | 8.25 |
| 0.12 | 226.97 | 370.76 | 551.47 | 875.83  | 0.53 | 1.99 | 3.21 | 4.84   | 7.51 |
| 0.13 | 185.97 | 302.74 | 463.80 | 720.57  | 0.54 | 1.81 | 2.94 | 4.38   | 6.84 |
| 0.14 | 154.65 | 252.40 | 382.15 | 601.63  | 0.55 | 1.66 | 2.70 | 4.02   | 6.19 |
| 0.15 | 129.48 | 212.97 | 320.57 | 505.55  | 0.56 | 1.52 | 2.44 | 3.65   | 5.67 |
| 0.16 | 109.01 | 181.82 | 277.02 | 433.92  | 0.57 | 1.39 | 2.23 | 3.32   | 5.15 |
| 0.17 | 92.52  | 154.35 | 233.00 | 367.14  | 0.58 | 1.26 | 2.04 | 3.00   | 4.65 |
| 0.18 | 79.43  | 132.89 | 201.35 | 317.97  | 0.59 | 1.16 | 1.86 | 2.74   | 4.23 |
| 0.19 | 68.36  | 114.15 | 170.41 | 273.59  | 0.60 | 1.05 | 1.69 | 2.49   | 3.81 |
| 0.20 | 59.15  | 98.98  | 149.95 | 237.75  | 0.61 | 0.96 | 1.54 | 2.24   | 3.43 |
| 0.21 | 51.85  | 85.87  | 131.69 | 207.25  | 0.62 | 0.88 | 1.39 | 2.04   | 3.14 |
| 0.22 | 45.52  | 75.29  | 114.53 | 181.13  | 0.63 | 0.79 | 1.26 | 1.84   | 2.79 |
| 0.23 | 39.93  | 66.04  | 101.15 | 160.23  | 0.64 | 0.72 | 1.13 | 1.66   | 2.55 |
| 0.24 | 35.42  | 58.03  | 88.91  | 141.03  | 0.65 | 0.65 | 1.03 | 1.50   | 2.28 |
| 0.25 | 31.43  | 51.52  | 78.38  | 124.10  | 0.66 | 0.58 | 0.92 | 1.36   | 2.04 |
| 0.26 | 27.82  | 45.96  | 70.07  | 111.69  | 0.67 | 0.53 | 0.83 | 1.22   | 1.83 |
| 0.27 | 24.87  | 41.10  | 62.70  | 100.11  | 0.68 | 0.48 | 0.75 | 1.09   | 1.64 |
| 0.28 | 22.15  | 36.88  | 56.06  | 88.40   | 0.69 | 0.43 | 0.67 | 0.97   | 1.47 |
| 0.29 | 19.88  | 32.86  | 49.79  | 79.71   | 0.70 | 0.39 | 0.61 | 0.87   | 1.32 |
| 0.30 | 17.87  | 29.40  | 45.05  | 70.16   | 0.71 | 0.35 | 0.54 | 0.79   | 1.17 |
| 0.31 | 15.95  | 26.60  | 40.44  | 63.57   | 0.72 | 0.31 | 0.49 | 0.69   | 1.03 |
| 0.32 | 14.48  | 24.19  | 36.47  | 57.42   | 0.73 | 0.28 | 0.43 | 0.62   | 0.91 |
| 0.33 | 13.14  | 21.60  | 32.96  | 51.31   | 0.74 | 0.25 | 0.39 | 0.55   | 0.80 |
| 0.34 | 11.89  | 19.67  | 29.94  | 46.80   | 0.75 | 0.22 | 0.34 | 0.48   | 0.71 |
| 0.35 | 10.75  | 17.90  | 26.97  | 42.89   | 0.76 | 0.20 | 0.30 | 0.42   | 0.62 |
| 0.36 | 9.82   | 16.29  | 24.42  | 39.42   | 0.77 | 0.18 | 0.27 | 0.38   | 0.54 |
| 0.37 | 8.89   | 14.73  | 22.38  | 35.77   | 0.78 | 0.16 | 0.24 | 0.33   | 0.48 |
| 0.38 | 8.07   | 13.44  | 20.24  | 31.71   | 0.79 | 0.14 | 0.21 | 0.28   | 0.41 |
| 0.39 | 7.38   | 12.13  | 18.29  | 28.84   | 0.80 | 0.12 | 0.18 | 0.25   | 0.35 |
| 0.40 | 6.68   | 11.09  | 16.65  | 26.20   | 0.81 | 0.10 | 0.15 | 0.21   | 0.31 |
| 0.41 | 6.07   | 10.01  | 15.00  | 23.76   | 0.82 | 0.09 | 0.13 | 0.18   | 0.26 |
| 0.42 | 5.54   | 9.11   | 13.68  | 21.45   | 0.83 | 0.08 | 0.11 | 0.16   | 0.22 |
| 0.43 | 5.02   | 8.21   | 12.36  | 19.31   | 0.84 | 0.07 | 0.10 | 0.13   | 0.19 |
| 0.44 | 4.57   | 7.52   | 11.33  | 17.77   | 0.85 | 0.06 | 0.08 | 0.11   | 0.16 |
| 0.45 | 4.17   | 6.89   | 10.32  | 16.02   | 0.86 | 0.05 | 0.07 | 0.09   | 0.13 |
| 0.46 | 3.82   | 6.28   | 9.35   | 14.54   | 0.87 | 0.04 | 0.06 | 0.08   | 0.11 |
| 0.47 | 3.47   | 5.65   | 8.48   | 13.15   | 0.88 | 0.03 | 0.05 | 0.06   | 0.08 |
| 0.48 | 3.17   | 5.19   | 7.65   | 11.97   | 0.89 | 0.03 | 0.04 | 0.05   | 0.07 |
| 0.49 | 2.89   | 4.73   | 7.08   | 10.98   | 0.90 | 0.02 | 0.03 | 0.04   | 0.05 |
| 0.50 | 2.62   | 4.29   | 6.42   | 9.89    |      |      |      |        |      |

Table S234: Critical values for detector  $\hat{H}_{mov}^{m,0.1}$  with windows size  $n = 0.1$ , and FM-OLS and D-OLS estimation in a model with intercept. The number of integrated regressors is 3 and the highest power of  $x_{kt}$  is 1.

| m    | 90 %   | 95 %    | 97,5 %  | 99 %    | m    | 90 % | 95 % | 97,5 % | 99 %  |
|------|--------|---------|---------|---------|------|------|------|--------|-------|
| 0.10 | 716.91 | 1222.94 | 1906.24 | 3179.39 | 0.51 | 4.83 | 8.18 | 12.75  | 20.90 |
| 0.11 | 567.49 | 971.11  | 1531.98 | 2540.87 | 0.52 | 4.39 | 7.45 | 11.70  | 18.96 |
| 0.12 | 461.73 | 791.40  | 1243.56 | 2056.29 | 0.53 | 3.99 | 6.76 | 10.58  | 17.10 |
| 0.13 | 376.83 | 643.26  | 1022.68 | 1684.44 | 0.54 | 3.62 | 6.14 | 9.57   | 15.66 |
| 0.14 | 314.03 | 536.51  | 850.41  | 1436.83 | 0.55 | 3.33 | 5.60 | 8.75   | 14.36 |
| 0.15 | 264.18 | 450.26  | 724.80  | 1210.30 | 0.56 | 3.04 | 5.13 | 7.88   | 12.90 |
| 0.16 | 223.30 | 376.47  | 602.28  | 1023.62 | 0.57 | 2.77 | 4.64 | 7.17   | 11.65 |
| 0.17 | 188.92 | 327.13  | 514.93  | 857.37  | 0.58 | 2.53 | 4.24 | 6.51   | 10.51 |
| 0.18 | 161.53 | 277.46  | 443.49  | 744.95  | 0.59 | 2.30 | 3.85 | 5.91   | 9.43  |
| 0.19 | 139.33 | 239.78  | 378.65  | 636.95  | 0.60 | 2.09 | 3.48 | 5.31   | 8.50  |
| 0.20 | 121.06 | 206.56  | 324.07  | 539.27  | 0.61 | 1.90 | 3.16 | 4.82   | 7.73  |
| 0.21 | 105.05 | 180.79  | 281.55  | 466.73  | 0.62 | 1.73 | 2.87 | 4.38   | 7.08  |
| 0.22 | 92.32  | 160.13  | 243.26  | 411.40  | 0.63 | 1.57 | 2.61 | 3.98   | 6.39  |
| 0.23 | 81.38  | 139.30  | 216.55  | 363.52  | 0.64 | 1.42 | 2.39 | 3.61   | 5.78  |
| 0.24 | 72.29  | 121.95  | 192.47  | 323.92  | 0.65 | 1.29 | 2.15 | 3.25   | 5.19  |
| 0.25 | 63.47  | 108.51  | 170.97  | 284.60  | 0.66 | 1.17 | 1.94 | 2.94   | 4.71  |
| 0.26 | 56.10  | 96.62   | 152.49  | 251.84  | 0.67 | 1.06 | 1.75 | 2.63   | 4.22  |
| 0.27 | 50.13  | 86.33   | 135.38  | 225.79  | 0.68 | 0.96 | 1.57 | 2.35   | 3.76  |
| 0.28 | 44.86  | 77.02   | 121.00  | 200.71  | 0.69 | 0.87 | 1.41 | 2.11   | 3.38  |
| 0.29 | 40.34  | 69.33   | 108.01  | 179.63  | 0.70 | 0.78 | 1.26 | 1.91   | 3.05  |
| 0.30 | 36.14  | 61.55   | 96.18   | 159.57  | 0.71 | 0.70 | 1.14 | 1.71   | 2.72  |
| 0.31 | 32.54  | 55.49   | 87.20   | 143.62  | 0.72 | 0.63 | 1.02 | 1.53   | 2.39  |
| 0.32 | 29.44  | 50.29   | 78.20   | 129.58  | 0.73 | 0.56 | 0.91 | 1.36   | 2.13  |
| 0.33 | 26.57  | 45.31   | 71.12   | 118.22  | 0.74 | 0.51 | 0.81 | 1.21   | 1.88  |
| 0.34 | 24.12  | 40.74   | 64.22   | 105.35  | 0.75 | 0.45 | 0.72 | 1.08   | 1.67  |
| 0.35 | 21.80  | 37.17   | 58.22   | 96.99   | 0.76 | 0.40 | 0.64 | 0.95   | 1.45  |
| 0.36 | 19.76  | 33.61   | 52.59   | 86.80   | 0.77 | 0.36 | 0.57 | 0.84   | 1.27  |
| 0.37 | 17.93  | 30.33   | 47.51   | 80.07   | 0.78 | 0.32 | 0.50 | 0.73   | 1.12  |
| 0.38 | 16.29  | 27.46   | 43.22   | 72.49   | 0.79 | 0.28 | 0.44 | 0.64   | 0.98  |
| 0.39 | 14.79  | 25.16   | 39.28   | 66.19   | 0.80 | 0.25 | 0.38 | 0.55   | 0.84  |
| 0.40 | 13.38  | 22.96   | 35.75   | 59.87   | 0.81 | 0.22 | 0.33 | 0.48   | 0.72  |
| 0.41 | 12.19  | 20.83   | 32.36   | 54.37   | 0.82 | 0.19 | 0.29 | 0.42   | 0.63  |
| 0.42 | 11.10  | 19.02   | 29.68   | 49.08   | 0.83 | 0.16 | 0.25 | 0.36   | 0.53  |
| 0.43 | 10.07  | 17.36   | 26.96   | 44.30   | 0.84 | 0.14 | 0.22 | 0.30   | 0.45  |
| 0.44 | 9.20   | 15.76   | 24.67   | 40.36   | 0.85 | 0.12 | 0.18 | 0.26   | 0.38  |
| 0.45 | 8.41   | 14.35   | 22.42   | 36.94   | 0.86 | 0.10 | 0.16 | 0.22   | 0.31  |
| 0.46 | 7.66   | 13.02   | 20.66   | 34.00   | 0.87 | 0.09 | 0.13 | 0.18   | 0.26  |
| 0.47 | 6.95   | 11.90   | 18.56   | 30.66   | 0.88 | 0.07 | 0.11 | 0.15   | 0.21  |
| 0.48 | 6.32   | 10.76   | 16.90   | 27.91   | 0.89 | 0.06 | 0.09 | 0.12   | 0.18  |
| 0.49 | 5.78   | 9.94    | 15.40   | 25.36   | 0.90 | 0.05 | 0.07 | 0.10   | 0.14  |
| 0.50 | 5.30   | 8.98    | 14.03   | 23.00   |      |      |      |        |       |

Table S235: Critical values for detector  $\hat{H}_{mov}^{m,0.1}$  with windows size  $n = 0.1$ , and IM-OLS estimation in a model with intercept. The number of integrated regressors is 3 and the highest power of  $x_{kt}$  is 1.

| m    | 90 %   | 95 %   | 97,5 %  | 99 %    | m    | 90 % | 95 % | 97,5 % | 99 %  |
|------|--------|--------|---------|---------|------|------|------|--------|-------|
| 0.10 | 559.97 | 924.40 | 1406.25 | 2278.57 | 0.51 | 3.58 | 5.80 | 8.69   | 13.60 |
| 0.11 | 449.47 | 735.65 | 1120.48 | 1775.44 | 0.52 | 3.25 | 5.27 | 7.81   | 12.17 |
| 0.12 | 365.32 | 600.74 | 899.94  | 1438.44 | 0.53 | 2.94 | 4.76 | 7.16   | 11.04 |
| 0.13 | 299.30 | 493.42 | 756.91  | 1187.63 | 0.54 | 2.66 | 4.32 | 6.46   | 10.01 |
| 0.14 | 249.41 | 411.10 | 627.64  | 991.76  | 0.55 | 2.44 | 3.97 | 5.89   | 9.04  |
| 0.15 | 208.74 | 346.28 | 524.06  | 830.63  | 0.56 | 2.24 | 3.55 | 5.32   | 8.20  |
| 0.16 | 175.87 | 295.88 | 452.68  | 712.02  | 0.57 | 2.01 | 3.24 | 4.81   | 7.41  |
| 0.17 | 149.21 | 250.50 | 380.90  | 603.21  | 0.58 | 1.83 | 2.93 | 4.34   | 6.63  |
| 0.18 | 128.31 | 215.55 | 327.66  | 522.94  | 0.59 | 1.67 | 2.66 | 3.90   | 6.02  |
| 0.19 | 110.10 | 185.30 | 278.22  | 447.75  | 0.60 | 1.50 | 2.40 | 3.54   | 5.35  |
| 0.20 | 95.12  | 160.24 | 243.22  | 392.33  | 0.61 | 1.37 | 2.17 | 3.16   | 4.84  |
| 0.21 | 83.76  | 139.29 | 213.61  | 338.88  | 0.62 | 1.23 | 1.95 | 2.84   | 4.38  |
| 0.22 | 73.27  | 121.70 | 186.58  | 293.96  | 0.63 | 1.11 | 1.76 | 2.55   | 3.85  |
| 0.23 | 64.25  | 107.06 | 164.27  | 260.25  | 0.64 | 1.00 | 1.57 | 2.29   | 3.47  |
| 0.24 | 56.71  | 93.66  | 143.56  | 230.69  | 0.65 | 0.90 | 1.42 | 2.04   | 3.10  |
| 0.25 | 50.37  | 82.97  | 126.37  | 202.77  | 0.66 | 0.80 | 1.25 | 1.83   | 2.76  |
| 0.26 | 44.51  | 73.92  | 112.66  | 181.79  | 0.67 | 0.72 | 1.13 | 1.64   | 2.44  |
| 0.27 | 39.73  | 66.00  | 101.47  | 161.01  | 0.68 | 0.64 | 1.00 | 1.45   | 2.17  |
| 0.28 | 35.32  | 59.16  | 90.49   | 142.16  | 0.69 | 0.58 | 0.89 | 1.28   | 1.92  |
| 0.29 | 31.69  | 52.54  | 79.91   | 128.50  | 0.70 | 0.52 | 0.80 | 1.15   | 1.70  |
| 0.30 | 28.33  | 47.08  | 72.06   | 113.48  | 0.71 | 0.46 | 0.71 | 1.01   | 1.51  |
| 0.31 | 25.35  | 42.53  | 64.50   | 101.69  | 0.72 | 0.41 | 0.63 | 0.89   | 1.31  |
| 0.32 | 22.98  | 38.48  | 57.86   | 91.56   | 0.73 | 0.36 | 0.55 | 0.78   | 1.14  |
| 0.33 | 20.71  | 34.24  | 52.44   | 81.94   | 0.74 | 0.32 | 0.49 | 0.68   | 0.99  |
| 0.34 | 18.73  | 31.18  | 47.46   | 74.61   | 0.75 | 0.28 | 0.42 | 0.59   | 0.87  |
| 0.35 | 16.92  | 28.34  | 42.55   | 67.92   | 0.76 | 0.25 | 0.37 | 0.52   | 0.74  |
| 0.36 | 15.43  | 25.60  | 38.74   | 62.17   | 0.77 | 0.22 | 0.32 | 0.45   | 0.64  |
| 0.37 | 13.95  | 23.16  | 35.21   | 56.44   | 0.78 | 0.19 | 0.28 | 0.39   | 0.55  |
| 0.38 | 12.60  | 21.09  | 31.90   | 50.12   | 0.79 | 0.16 | 0.24 | 0.33   | 0.47  |
| 0.39 | 11.55  | 18.98  | 28.59   | 45.28   | 0.80 | 0.14 | 0.21 | 0.28   | 0.40  |
| 0.40 | 10.34  | 17.32  | 25.88   | 41.00   | 0.81 | 0.12 | 0.17 | 0.24   | 0.34  |
| 0.41 | 9.43   | 15.55  | 23.37   | 36.94   | 0.82 | 0.10 | 0.15 | 0.20   | 0.29  |
| 0.42 | 8.56   | 14.14  | 21.21   | 33.22   | 0.83 | 0.09 | 0.13 | 0.17   | 0.24  |
| 0.43 | 7.75   | 12.63  | 19.16   | 29.87   | 0.84 | 0.08 | 0.11 | 0.14   | 0.20  |
| 0.44 | 7.01   | 11.59  | 17.35   | 27.37   | 0.85 | 0.07 | 0.09 | 0.12   | 0.17  |
| 0.45 | 6.37   | 10.57  | 15.86   | 24.38   | 0.86 | 0.06 | 0.08 | 0.10   | 0.14  |
| 0.46 | 5.83   | 9.63   | 14.27   | 22.18   | 0.87 | 0.05 | 0.07 | 0.09   | 0.11  |
| 0.47 | 5.27   | 8.63   | 12.90   | 19.98   | 0.88 | 0.04 | 0.06 | 0.07   | 0.10  |
| 0.48 | 4.79   | 7.87   | 11.56   | 18.10   | 0.89 | 0.04 | 0.05 | 0.06   | 0.08  |
| 0.49 | 4.36   | 7.15   | 10.68   | 16.62   | 0.90 | 0.03 | 0.05 | 0.06   | 0.07  |
| 0.50 | 3.94   | 6.45   | 9.64    | 14.89   |      |      |      |        |       |

Table S236: Critical values for detector  $\hat{H}_{mov}^{m,0.2}$  with windows size  $n = 0.2$ , and FM-OLS and D-OLS estimation in a model with intercept. The number of integrated regressors is 3 and the highest power of  $x_{kt}$  is 1.

| m    | 90 %    | 95 %    | 97,5 %  | 99 %    | m    | 90 % | 95 %  | 97,5 % | 99 %  |
|------|---------|---------|---------|---------|------|------|-------|--------|-------|
| 0.10 | 1143.74 | 1967.94 | 3084.98 | 5181.78 | 0.51 | 7.25 | 12.26 | 19.05  | 31.32 |
| 0.11 | 908.00  | 1565.46 | 2501.95 | 4170.22 | 0.52 | 6.55 | 11.14 | 17.47  | 28.18 |
| 0.12 | 739.38  | 1280.14 | 2022.04 | 3382.02 | 0.53 | 5.94 | 10.05 | 15.66  | 25.48 |
| 0.13 | 603.58  | 1040.92 | 1668.12 | 2766.61 | 0.54 | 5.36 | 9.09  | 14.16  | 22.96 |
| 0.14 | 504.37  | 865.95  | 1388.03 | 2355.80 | 0.55 | 4.88 | 8.25  | 12.85  | 20.89 |
| 0.15 | 423.92  | 729.22  | 1179.63 | 1989.56 | 0.56 | 4.45 | 7.48  | 11.57  | 18.67 |
| 0.16 | 357.76  | 613.24  | 976.72  | 1668.64 | 0.57 | 4.04 | 6.76  | 10.40  | 16.83 |
| 0.17 | 303.15  | 528.73  | 836.66  | 1410.48 | 0.58 | 3.66 | 6.14  | 9.41   | 15.07 |
| 0.18 | 259.54  | 448.59  | 722.73  | 1216.84 | 0.59 | 3.31 | 5.54  | 8.43   | 13.65 |
| 0.19 | 223.56  | 387.38  | 614.74  | 1037.17 | 0.60 | 2.99 | 4.98  | 7.58   | 12.12 |
| 0.20 | 194.33  | 332.51  | 524.41  | 873.21  | 0.61 | 2.71 | 4.47  | 6.82   | 10.94 |
| 0.21 | 169.40  | 292.00  | 454.34  | 762.50  | 0.62 | 2.45 | 4.05  | 6.17   | 9.90  |
| 0.22 | 147.98  | 257.82  | 393.02  | 670.09  | 0.63 | 2.21 | 3.65  | 5.56   | 8.89  |
| 0.23 | 130.47  | 224.91  | 351.24  | 592.99  | 0.64 | 1.99 | 3.31  | 5.00   | 7.92  |
| 0.24 | 115.46  | 196.49  | 310.66  | 524.38  | 0.65 | 1.80 | 2.97  | 4.50   | 7.14  |
| 0.25 | 101.58  | 174.13  | 276.34  | 457.50  | 0.66 | 1.61 | 2.66  | 4.01   | 6.40  |
| 0.26 | 89.66   | 155.23  | 246.09  | 404.81  | 0.67 | 1.45 | 2.39  | 3.56   | 5.68  |
| 0.27 | 79.72   | 138.60  | 217.32  | 362.31  | 0.68 | 1.30 | 2.11  | 3.15   | 5.01  |
| 0.28 | 71.44   | 123.75  | 193.49  | 322.71  | 0.69 | 1.17 | 1.88  | 2.81   | 4.45  |
| 0.29 | 64.25   | 110.54  | 171.79  | 287.83  | 0.70 | 1.04 | 1.68  | 2.50   | 3.96  |
| 0.30 | 57.39   | 98.54   | 154.70  | 256.99  | 0.71 | 0.92 | 1.49  | 2.24   | 3.49  |
| 0.31 | 51.58   | 88.34   | 138.72  | 229.76  | 0.72 | 0.82 | 1.32  | 1.98   | 3.06  |
| 0.32 | 46.57   | 80.16   | 124.63  | 207.13  | 0.73 | 0.73 | 1.17  | 1.74   | 2.69  |
| 0.33 | 41.92   | 71.89   | 112.83  | 187.38  | 0.74 | 0.65 | 1.04  | 1.53   | 2.37  |
| 0.34 | 38.02   | 64.41   | 101.28  | 168.71  | 0.75 | 0.57 | 0.91  | 1.35   | 2.06  |
| 0.35 | 34.17   | 58.72   | 91.96   | 153.78  | 0.76 | 0.50 | 0.80  | 1.17   | 1.78  |
| 0.36 | 30.93   | 52.89   | 82.97   | 136.17  | 0.77 | 0.44 | 0.69  | 1.02   | 1.53  |
| 0.37 | 28.12   | 47.69   | 74.92   | 126.45  | 0.78 | 0.39 | 0.60  | 0.88   | 1.34  |
| 0.38 | 25.51   | 43.15   | 68.15   | 113.29  | 0.79 | 0.34 | 0.53  | 0.76   | 1.15  |
| 0.39 | 23.08   | 39.24   | 61.19   | 103.81  | 0.80 | 0.29 | 0.45  | 0.64   | 0.97  |
| 0.40 | 20.83   | 35.63   | 55.74   | 93.29   | 0.81 | 0.25 | 0.39  | 0.55   | 0.82  |
| 0.41 | 18.93   | 32.37   | 50.49   | 83.75   | 0.82 | 0.22 | 0.33  | 0.47   | 0.70  |
| 0.42 | 17.18   | 29.50   | 45.96   | 75.79   | 0.83 | 0.19 | 0.28  | 0.40   | 0.59  |
| 0.43 | 15.54   | 26.94   | 41.75   | 68.21   | 0.84 | 0.16 | 0.24  | 0.34   | 0.49  |
| 0.44 | 14.15   | 24.28   | 37.70   | 62.23   | 0.85 | 0.13 | 0.20  | 0.28   | 0.41  |
| 0.45 | 12.90   | 22.05   | 34.48   | 56.81   | 0.86 | 0.11 | 0.17  | 0.23   | 0.33  |
| 0.46 | 11.71   | 19.92   | 31.54   | 51.31   | 0.87 | 0.09 | 0.14  | 0.19   | 0.27  |
| 0.47 | 10.60   | 18.11   | 28.16   | 46.67   | 0.88 | 0.08 | 0.11  | 0.16   | 0.22  |
| 0.48 | 9.60    | 16.43   | 25.54   | 42.10   | 0.89 | 0.06 | 0.09  | 0.13   | 0.18  |
| 0.49 | 8.72    | 14.94   | 23.12   | 38.27   | 0.90 | 0.05 | 0.08  | 0.10   | 0.15  |
| 0.50 | 8.00    | 13.55   | 21.07   | 34.36   |      |      |       |        |       |

Table S237: Critical values for detector  $\hat{H}_{mov}^{m,0.2}$  with windows size  $n = 0.2$ , and IM-OLS estimation in a model with intercept. The number of integrated regressors is 3 and the highest power of  $x_{kt}$  is 1.

| m    | 90 %   | 95 %    | 97,5 %  | 99 %    | m    | 90 % | 95 % | 97,5 % | 99 %  |
|------|--------|---------|---------|---------|------|------|------|--------|-------|
| 0.10 | 685.39 | 1138.09 | 1736.31 | 2848.62 | 0.51 | 4.06 | 6.56 | 9.78   | 15.37 |
| 0.11 | 547.77 | 905.85  | 1383.57 | 2211.04 | 0.52 | 3.67 | 5.94 | 8.78   | 13.63 |
| 0.12 | 446.99 | 738.88  | 1115.02 | 1774.91 | 0.53 | 3.32 | 5.35 | 8.01   | 12.35 |
| 0.13 | 365.08 | 607.01  | 935.66  | 1470.75 | 0.54 | 3.00 | 4.84 | 7.23   | 11.18 |
| 0.14 | 304.21 | 505.83  | 777.47  | 1230.28 | 0.55 | 2.72 | 4.42 | 6.57   | 10.02 |
| 0.15 | 254.21 | 425.37  | 646.50  | 1028.70 | 0.56 | 2.49 | 3.95 | 5.88   | 8.97  |
| 0.16 | 215.40 | 362.89  | 557.46  | 878.40  | 0.57 | 2.23 | 3.59 | 5.29   | 8.14  |
| 0.17 | 181.78 | 307.02  | 471.11  | 746.93  | 0.58 | 2.02 | 3.21 | 4.74   | 7.24  |
| 0.18 | 156.11 | 264.27  | 402.99  | 646.61  | 0.59 | 1.83 | 2.90 | 4.26   | 6.54  |
| 0.19 | 134.19 | 226.57  | 341.60  | 553.03  | 0.60 | 1.64 | 2.61 | 3.84   | 5.78  |
| 0.20 | 115.81 | 196.33  | 298.26  | 483.19  | 0.61 | 1.48 | 2.34 | 3.41   | 5.22  |
| 0.21 | 101.78 | 170.41  | 261.21  | 416.73  | 0.62 | 1.33 | 2.11 | 3.05   | 4.68  |
| 0.22 | 89.11  | 148.48  | 228.07  | 357.67  | 0.63 | 1.20 | 1.88 | 2.72   | 4.08  |
| 0.23 | 78.19  | 130.41  | 200.28  | 320.64  | 0.64 | 1.07 | 1.67 | 2.43   | 3.67  |
| 0.24 | 68.78  | 114.15  | 175.80  | 280.94  | 0.65 | 0.96 | 1.51 | 2.15   | 3.26  |
| 0.25 | 61.08  | 100.59  | 153.82  | 246.89  | 0.66 | 0.85 | 1.32 | 1.92   | 2.88  |
| 0.26 | 53.85  | 89.68   | 137.25  | 220.80  | 0.67 | 0.76 | 1.18 | 1.72   | 2.54  |
| 0.27 | 48.03  | 80.29   | 123.01  | 195.12  | 0.68 | 0.68 | 1.04 | 1.50   | 2.24  |
| 0.28 | 42.63  | 71.61   | 109.99  | 172.97  | 0.69 | 0.60 | 0.92 | 1.33   | 1.99  |
| 0.29 | 38.24  | 63.50   | 96.46   | 154.42  | 0.70 | 0.54 | 0.82 | 1.18   | 1.75  |
| 0.30 | 34.02  | 56.86   | 87.00   | 138.14  | 0.71 | 0.47 | 0.72 | 1.03   | 1.54  |
| 0.31 | 30.45  | 51.23   | 77.52   | 121.83  | 0.72 | 0.42 | 0.64 | 0.90   | 1.34  |
| 0.32 | 27.51  | 46.14   | 69.73   | 109.80  | 0.73 | 0.37 | 0.56 | 0.79   | 1.16  |
| 0.33 | 24.73  | 41.03   | 62.55   | 98.57   | 0.74 | 0.33 | 0.49 | 0.69   | 1.00  |
| 0.34 | 22.33  | 37.26   | 56.68   | 89.49   | 0.75 | 0.29 | 0.43 | 0.60   | 0.87  |
| 0.35 | 20.14  | 33.65   | 50.66   | 81.20   | 0.76 | 0.25 | 0.38 | 0.52   | 0.75  |
| 0.36 | 18.38  | 30.45   | 45.97   | 73.75   | 0.77 | 0.22 | 0.33 | 0.45   | 0.64  |
| 0.37 | 16.49  | 27.48   | 41.48   | 67.06   | 0.78 | 0.19 | 0.28 | 0.39   | 0.56  |
| 0.38 | 14.87  | 24.89   | 37.58   | 59.34   | 0.79 | 0.17 | 0.25 | 0.33   | 0.47  |
| 0.39 | 13.56  | 22.34   | 33.67   | 53.15   | 0.80 | 0.15 | 0.21 | 0.29   | 0.40  |
| 0.40 | 12.16  | 20.39   | 30.40   | 48.22   | 0.81 | 0.13 | 0.18 | 0.25   | 0.35  |
| 0.41 | 11.08  | 18.21   | 27.42   | 43.32   | 0.82 | 0.12 | 0.16 | 0.21   | 0.30  |
| 0.42 | 10.02  | 16.47   | 24.65   | 38.76   | 0.83 | 0.10 | 0.14 | 0.19   | 0.25  |
| 0.43 | 9.06   | 14.74   | 22.37   | 34.95   | 0.84 | 0.09 | 0.13 | 0.16   | 0.22  |
| 0.44 | 8.17   | 13.44   | 20.10   | 31.64   | 0.85 | 0.08 | 0.11 | 0.14   | 0.19  |
| 0.45 | 7.38   | 12.23   | 18.36   | 28.07   | 0.86 | 0.07 | 0.10 | 0.12   | 0.16  |
| 0.46 | 6.73   | 11.12   | 16.42   | 25.47   | 0.87 | 0.07 | 0.09 | 0.11   | 0.15  |
| 0.47 | 6.05   | 9.92    | 14.81   | 22.94   | 0.88 | 0.06 | 0.08 | 0.10   | 0.13  |
| 0.48 | 5.50   | 9.02    | 13.27   | 20.67   | 0.89 | 0.05 | 0.07 | 0.09   | 0.12  |
| 0.49 | 4.99   | 8.16    | 12.18   | 18.93   | 0.90 | 0.05 | 0.07 | 0.09   | 0.12  |
| 0.50 | 4.50   | 7.32    | 10.93   | 16.95   |      |      |      |        |       |

Table S238: Critical values for detector  $\hat{H}_{mov}^{m,0.3}$  with windows size  $n = 0.3$ , and FM-OLS and D-OLS estimation in a model with intercept. The number of integrated regressors is 3 and the highest power of  $x_{kt}$  is 1.

| m    | 90 %    | 95 %    | 97,5 %  | 99 %    | m    | 90 % | 95 %  | 97,5 % | 99 %  |
|------|---------|---------|---------|---------|------|------|-------|--------|-------|
| 0.10 | 1391.55 | 2411.98 | 3826.62 | 6408.91 | 0.51 | 8.22 | 13.87 | 21.49  | 35.23 |
| 0.11 | 1109.34 | 1920.17 | 3072.73 | 5171.25 | 0.52 | 7.41 | 12.57 | 19.64  | 31.52 |
| 0.12 | 899.12  | 1570.02 | 2492.43 | 4218.96 | 0.53 | 6.71 | 11.33 | 17.53  | 28.47 |
| 0.13 | 737.53  | 1276.59 | 2051.09 | 3431.88 | 0.54 | 6.02 | 10.19 | 15.83  | 25.62 |
| 0.14 | 616.40  | 1063.67 | 1699.17 | 2911.12 | 0.55 | 5.47 | 9.21  | 14.27  | 23.10 |
| 0.15 | 516.01  | 897.03  | 1452.18 | 2454.08 | 0.56 | 4.95 | 8.29  | 12.76  | 20.82 |
| 0.16 | 437.07  | 750.39  | 1203.00 | 2062.17 | 0.57 | 4.48 | 7.48  | 11.51  | 18.60 |
| 0.17 | 368.52  | 648.17  | 1028.44 | 1746.18 | 0.58 | 4.04 | 6.75  | 10.29  | 16.56 |
| 0.18 | 315.90  | 549.29  | 887.21  | 1505.32 | 0.59 | 3.63 | 6.08  | 9.20   | 14.81 |
| 0.19 | 272.44  | 475.22  | 753.90  | 1275.29 | 0.60 | 3.28 | 5.44  | 8.25   | 13.09 |
| 0.20 | 236.31  | 406.90  | 642.70  | 1068.69 | 0.61 | 2.96 | 4.86  | 7.38   | 11.77 |
| 0.21 | 205.57  | 356.88  | 554.59  | 934.80  | 0.62 | 2.66 | 4.36  | 6.66   | 10.59 |
| 0.22 | 179.74  | 314.37  | 482.24  | 819.28  | 0.63 | 2.40 | 3.93  | 5.95   | 9.48  |
| 0.23 | 157.48  | 273.66  | 429.42  | 726.12  | 0.64 | 2.14 | 3.54  | 5.33   | 8.45  |
| 0.24 | 139.22  | 239.53  | 379.91  | 633.57  | 0.65 | 1.92 | 3.16  | 4.77   | 7.54  |
| 0.25 | 122.50  | 211.38  | 335.61  | 557.81  | 0.66 | 1.71 | 2.82  | 4.22   | 6.70  |
| 0.26 | 108.24  | 187.81  | 299.05  | 489.82  | 0.67 | 1.53 | 2.52  | 3.73   | 5.91  |
| 0.27 | 96.44   | 167.16  | 262.75  | 440.31  | 0.68 | 1.37 | 2.22  | 3.30   | 5.23  |
| 0.28 | 86.03   | 149.21  | 233.89  | 389.68  | 0.69 | 1.22 | 1.95  | 2.92   | 4.63  |
| 0.29 | 77.11   | 133.12  | 207.19  | 348.97  | 0.70 | 1.08 | 1.74  | 2.58   | 4.07  |
| 0.30 | 68.85   | 118.44  | 185.81  | 312.11  | 0.71 | 0.96 | 1.53  | 2.30   | 3.59  |
| 0.31 | 61.66   | 106.37  | 166.80  | 275.36  | 0.72 | 0.85 | 1.36  | 2.03   | 3.14  |
| 0.32 | 55.64   | 96.04   | 149.41  | 247.66  | 0.73 | 0.75 | 1.20  | 1.77   | 2.73  |
| 0.33 | 49.98   | 86.09   | 134.30  | 223.96  | 0.74 | 0.66 | 1.06  | 1.56   | 2.40  |
| 0.34 | 45.27   | 76.88   | 120.66  | 203.33  | 0.75 | 0.59 | 0.92  | 1.37   | 2.09  |
| 0.35 | 40.55   | 69.87   | 109.60  | 183.32  | 0.76 | 0.51 | 0.81  | 1.18   | 1.80  |
| 0.36 | 36.73   | 62.74   | 98.48   | 162.70  | 0.77 | 0.45 | 0.70  | 1.03   | 1.54  |
| 0.37 | 33.25   | 56.42   | 88.83   | 149.83  | 0.78 | 0.39 | 0.61  | 0.88   | 1.34  |
| 0.38 | 30.05   | 51.15   | 80.67   | 134.81  | 0.79 | 0.34 | 0.53  | 0.76   | 1.16  |
| 0.39 | 27.13   | 46.28   | 72.33   | 121.37  | 0.80 | 0.29 | 0.46  | 0.65   | 0.97  |
| 0.40 | 24.44   | 41.98   | 65.36   | 110.36  | 0.81 | 0.25 | 0.39  | 0.56   | 0.82  |
| 0.41 | 22.23   | 38.08   | 59.26   | 98.30   | 0.82 | 0.22 | 0.33  | 0.47   | 0.70  |
| 0.42 | 20.20   | 34.50   | 53.73   | 88.52   | 0.83 | 0.19 | 0.28  | 0.40   | 0.59  |
| 0.43 | 18.16   | 31.45   | 48.26   | 79.03   | 0.84 | 0.16 | 0.24  | 0.34   | 0.49  |
| 0.44 | 16.42   | 28.24   | 43.66   | 72.74   | 0.85 | 0.14 | 0.20  | 0.28   | 0.41  |
| 0.45 | 14.98   | 25.51   | 39.80   | 65.81   | 0.86 | 0.11 | 0.17  | 0.24   | 0.34  |
| 0.46 | 13.48   | 23.08   | 36.22   | 59.06   | 0.87 | 0.10 | 0.14  | 0.20   | 0.27  |
| 0.47 | 12.23   | 20.89   | 32.22   | 53.43   | 0.88 | 0.08 | 0.12  | 0.16   | 0.22  |
| 0.48 | 11.04   | 18.83   | 29.18   | 47.87   | 0.89 | 0.07 | 0.10  | 0.13   | 0.18  |
| 0.49 | 9.98    | 17.12   | 26.45   | 43.46   | 0.90 | 0.06 | 0.08  | 0.11   | 0.15  |
| 0.50 | 9.10    | 15.43   | 23.87   | 39.12   |      |      |       |        |       |

Table S239: Critical values for detector  $\hat{H}_{mov}^{m,0.3}$  with windows size  $n = 0.3$ , and IM-OLS estimation in a model with intercept. The number of integrated regressors is 3 and the highest power of  $x_{kt}$  is 1.



| m    | 90 %    | 95 %    | 97,5 %   | 99 %     | m    | 90 % | 95 %  | 97,5 % | 99 %  |
|------|---------|---------|----------|----------|------|------|-------|--------|-------|
| 0.10 | 5750.33 | 9023.92 | 13243.06 | 19950.49 | 0.51 | 6.54 | 10.30 | 14.93  | 22.50 |
| 0.11 | 4100.90 | 6469.36 | 9334.81  | 14148.48 | 0.52 | 5.76 | 9.09  | 13.27  | 20.13 |
| 0.12 | 2989.06 | 4707.21 | 6905.54  | 10506.16 | 0.53 | 5.17 | 8.17  | 11.97  | 18.16 |
| 0.13 | 2232.04 | 3509.27 | 5123.88  | 7762.27  | 0.54 | 4.62 | 7.36  | 10.76  | 16.40 |
| 0.14 | 1722.78 | 2699.11 | 3866.50  | 5896.01  | 0.55 | 4.16 | 6.58  | 9.57   | 14.49 |
| 0.15 | 1340.07 | 2093.06 | 3004.40  | 4579.75  | 0.56 | 3.73 | 5.85  | 8.48   | 12.95 |
| 0.16 | 1048.48 | 1656.90 | 2417.90  | 3590.55  | 0.57 | 3.32 | 5.22  | 7.61   | 11.58 |
| 0.17 | 836.27  | 1327.85 | 1948.59  | 2925.47  | 0.58 | 2.97 | 4.66  | 6.77   | 10.27 |
| 0.18 | 671.61  | 1061.96 | 1540.73  | 2351.60  | 0.59 | 2.68 | 4.20  | 6.07   | 9.11  |
| 0.19 | 540.17  | 859.83  | 1255.09  | 1890.12  | 0.60 | 2.39 | 3.74  | 5.46   | 8.17  |
| 0.20 | 447.79  | 704.47  | 1021.68  | 1554.77  | 0.61 | 2.14 | 3.33  | 4.80   | 7.14  |
| 0.21 | 368.31  | 585.87  | 859.93   | 1286.35  | 0.62 | 1.92 | 2.97  | 4.28   | 6.34  |
| 0.22 | 305.73  | 482.37  | 700.03   | 1075.16  | 0.63 | 1.70 | 2.65  | 3.82   | 5.66  |
| 0.23 | 256.90  | 406.51  | 590.03   | 897.05   | 0.64 | 1.51 | 2.35  | 3.40   | 5.07  |
| 0.24 | 214.59  | 341.76  | 499.19   | 760.05   | 0.65 | 1.33 | 2.07  | 3.00   | 4.43  |
| 0.25 | 182.33  | 291.14  | 429.72   | 647.66   | 0.66 | 1.19 | 1.83  | 2.61   | 3.90  |
| 0.26 | 155.94  | 246.58  | 360.92   | 550.30   | 0.67 | 1.06 | 1.62  | 2.32   | 3.44  |
| 0.27 | 133.34  | 212.27  | 308.44   | 477.45   | 0.68 | 0.93 | 1.43  | 2.03   | 3.00  |
| 0.28 | 114.91  | 181.28  | 267.84   | 412.73   | 0.69 | 0.82 | 1.26  | 1.79   | 2.62  |
| 0.29 | 98.09   | 156.72  | 228.60   | 351.38   | 0.70 | 0.73 | 1.12  | 1.58   | 2.35  |
| 0.30 | 85.35   | 135.65  | 197.27   | 301.33   | 0.71 | 0.64 | 0.99  | 1.40   | 2.07  |
| 0.31 | 73.89   | 117.93  | 172.49   | 256.39   | 0.72 | 0.56 | 0.87  | 1.23   | 1.80  |
| 0.32 | 64.89   | 102.46  | 150.97   | 225.48   | 0.73 | 0.50 | 0.75  | 1.06   | 1.56  |
| 0.33 | 56.32   | 89.61   | 130.03   | 196.65   | 0.74 | 0.43 | 0.66  | 0.94   | 1.37  |
| 0.34 | 49.11   | 78.17   | 115.41   | 175.06   | 0.75 | 0.38 | 0.57  | 0.80   | 1.19  |
| 0.35 | 43.24   | 69.21   | 101.78   | 155.00   | 0.76 | 0.33 | 0.50  | 0.70   | 1.03  |
| 0.36 | 38.26   | 61.08   | 88.73    | 137.13   | 0.77 | 0.29 | 0.43  | 0.60   | 0.87  |
| 0.37 | 33.78   | 54.25   | 78.23    | 118.15   | 0.78 | 0.25 | 0.37  | 0.52   | 0.73  |
| 0.38 | 29.64   | 46.84   | 69.17    | 104.08   | 0.79 | 0.21 | 0.32  | 0.44   | 0.63  |
| 0.39 | 26.19   | 41.69   | 61.08    | 91.24    | 0.80 | 0.18 | 0.27  | 0.37   | 0.54  |
| 0.40 | 23.23   | 36.87   | 53.62    | 81.45    | 0.81 | 0.16 | 0.23  | 0.32   | 0.45  |
| 0.41 | 20.60   | 32.71   | 47.51    | 71.93    | 0.82 | 0.13 | 0.20  | 0.27   | 0.38  |
| 0.42 | 18.34   | 29.08   | 42.06    | 63.74    | 0.83 | 0.11 | 0.17  | 0.23   | 0.32  |
| 0.43 | 16.27   | 25.66   | 37.27    | 56.88    | 0.84 | 0.09 | 0.14  | 0.19   | 0.27  |
| 0.44 | 14.38   | 22.98   | 33.11    | 50.11    | 0.85 | 0.08 | 0.11  | 0.15   | 0.22  |
| 0.45 | 12.85   | 20.46   | 29.60    | 45.40    | 0.86 | 0.06 | 0.09  | 0.12   | 0.17  |
| 0.46 | 11.52   | 18.36   | 26.57    | 40.38    | 0.87 | 0.05 | 0.07  | 0.10   | 0.14  |
| 0.47 | 10.27   | 16.23   | 23.72    | 35.90    | 0.88 | 0.04 | 0.06  | 0.08   | 0.11  |
| 0.48 | 9.19    | 14.53   | 21.22    | 32.11    | 0.89 | 0.03 | 0.05  | 0.06   | 0.08  |
| 0.49 | 8.19    | 12.93   | 18.75    | 28.10    | 0.90 | 0.03 | 0.04  | 0.05   | 0.06  |
| 0.50 | 7.31    | 11.53   | 16.76    | 25.35    |      |      |       |        |       |

Table S240: Critical values for detector  $\hat{H}_{mov}^{m,0.1}$  with windows size  $n = 0.1$ , and FM-OLS and D-OLS estimation in a model with intercept and linear trend. The number of integrated regressors is 3 and the highest power of  $x_{kt}$  is 1.

| m    | 90 %     | 95 %     | 97,5 %   | 99 %     | m    | 90 %  | 95 %  | 97,5 % | 99 %  |
|------|----------|----------|----------|----------|------|-------|-------|--------|-------|
| 0.10 | 11431.33 | 18867.39 | 28499.26 | 45617.73 | 0.51 | 12.82 | 21.19 | 31.76  | 50.46 |
| 0.11 | 8182.30  | 13232.64 | 20241.36 | 32551.98 | 0.52 | 11.50 | 18.85 | 28.50  | 45.33 |
| 0.12 | 5917.35  | 9673.57  | 14602.59 | 23416.55 | 0.53 | 10.22 | 16.87 | 25.54  | 40.14 |
| 0.13 | 4425.50  | 7243.21  | 10875.30 | 17344.83 | 0.54 | 9.15  | 15.04 | 22.93  | 36.11 |
| 0.14 | 3374.50  | 5488.01  | 8315.62  | 13111.08 | 0.55 | 8.14  | 13.38 | 20.65  | 32.04 |
| 0.15 | 2620.54  | 4311.81  | 6513.83  | 10371.43 | 0.56 | 7.32  | 12.06 | 18.47  | 28.64 |
| 0.16 | 2062.97  | 3392.55  | 5120.49  | 8102.47  | 0.57 | 6.58  | 10.76 | 16.34  | 25.62 |
| 0.17 | 1648.23  | 2689.89  | 4075.93  | 6328.93  | 0.58 | 5.88  | 9.55  | 14.48  | 22.92 |
| 0.18 | 1311.91  | 2163.46  | 3269.47  | 5173.70  | 0.59 | 5.26  | 8.54  | 12.81  | 20.27 |
| 0.19 | 1064.61  | 1744.50  | 2627.00  | 4208.03  | 0.60 | 4.70  | 7.62  | 11.40  | 17.96 |
| 0.20 | 864.38   | 1416.36  | 2141.71  | 3465.74  | 0.61 | 4.18  | 6.80  | 10.14  | 15.99 |
| 0.21 | 712.57   | 1165.33  | 1765.72  | 2821.53  | 0.62 | 3.73  | 6.10  | 9.06   | 14.18 |
| 0.22 | 591.01   | 976.94   | 1457.35  | 2346.63  | 0.63 | 3.33  | 5.43  | 8.01   | 12.69 |
| 0.23 | 496.68   | 813.37   | 1246.82  | 1975.70  | 0.64 | 2.98  | 4.80  | 7.13   | 11.38 |
| 0.24 | 419.92   | 695.22   | 1053.60  | 1663.61  | 0.65 | 2.64  | 4.25  | 6.36   | 10.10 |
| 0.25 | 357.61   | 582.45   | 881.85   | 1408.37  | 0.66 | 2.34  | 3.80  | 5.65   | 8.79  |
| 0.26 | 303.39   | 498.18   | 758.42   | 1205.37  | 0.67 | 2.08  | 3.35  | 5.04   | 7.72  |
| 0.27 | 259.75   | 430.67   | 651.37   | 1022.58  | 0.68 | 1.84  | 2.98  | 4.42   | 6.81  |
| 0.28 | 222.74   | 371.60   | 566.13   | 890.74   | 0.69 | 1.63  | 2.63  | 3.86   | 6.01  |
| 0.29 | 192.80   | 321.75   | 488.84   | 778.89   | 0.70 | 1.44  | 2.30  | 3.40   | 5.25  |
| 0.30 | 166.93   | 278.04   | 422.02   | 681.89   | 0.71 | 1.27  | 2.02  | 2.98   | 4.63  |
| 0.31 | 145.41   | 241.13   | 369.42   | 588.68   | 0.72 | 1.12  | 1.78  | 2.62   | 4.10  |
| 0.32 | 127.09   | 208.72   | 318.89   | 507.78   | 0.73 | 0.98  | 1.56  | 2.30   | 3.51  |
| 0.33 | 111.03   | 182.88   | 276.92   | 442.43   | 0.74 | 0.87  | 1.37  | 2.00   | 3.05  |
| 0.34 | 96.77    | 159.38   | 239.60   | 386.89   | 0.75 | 0.76  | 1.19  | 1.74   | 2.61  |
| 0.35 | 84.86    | 140.85   | 211.17   | 340.88   | 0.76 | 0.66  | 1.03  | 1.50   | 2.28  |
| 0.36 | 74.96    | 124.57   | 185.01   | 292.62   | 0.77 | 0.58  | 0.90  | 1.30   | 1.96  |
| 0.37 | 65.86    | 109.19   | 164.52   | 263.30   | 0.78 | 0.50  | 0.77  | 1.12   | 1.69  |
| 0.38 | 58.12    | 96.78    | 144.94   | 232.89   | 0.79 | 0.43  | 0.67  | 0.96   | 1.44  |
| 0.39 | 51.16    | 85.55    | 129.93   | 207.17   | 0.80 | 0.37  | 0.57  | 0.82   | 1.22  |
| 0.40 | 45.52    | 75.65    | 115.26   | 182.51   | 0.81 | 0.32  | 0.49  | 0.69   | 1.03  |
| 0.41 | 40.56    | 67.66    | 101.92   | 161.55   | 0.82 | 0.27  | 0.41  | 0.59   | 0.87  |
| 0.42 | 36.12    | 60.16    | 90.85    | 142.36   | 0.83 | 0.23  | 0.35  | 0.50   | 0.73  |
| 0.43 | 32.23    | 53.32    | 81.35    | 126.23   | 0.84 | 0.19  | 0.30  | 0.41   | 0.61  |
| 0.44 | 28.82    | 47.67    | 72.25    | 113.44   | 0.85 | 0.16  | 0.25  | 0.34   | 0.50  |
| 0.45 | 25.53    | 42.14    | 64.29    | 101.22   | 0.86 | 0.14  | 0.21  | 0.28   | 0.41  |
| 0.46 | 22.76    | 37.77    | 56.80    | 89.70    | 0.87 | 0.11  | 0.17  | 0.23   | 0.33  |
| 0.47 | 20.28    | 33.60    | 51.13    | 80.58    | 0.88 | 0.09  | 0.14  | 0.19   | 0.27  |
| 0.48 | 18.16    | 29.97    | 45.40    | 71.69    | 0.89 | 0.07  | 0.11  | 0.15   | 0.21  |
| 0.49 | 16.08    | 26.84    | 40.27    | 63.51    | 0.90 | 0.06  | 0.09  | 0.12   | 0.17  |
| 0.50 | 14.36    | 23.88    | 35.38    | 56.20    |      |       |       |        |       |

Table S241: Critical values for detector  $\hat{H}_{mov}^{m,0.1}$  with windows size  $n = 0.1$ , and IM-OLS estimation in a model with intercept and linear trend. The number of integrated regressors is 3 and the highest power of  $x_{kt}$  is 1.

| m    | 90 %    | 95 %     | 97,5 %   | 99 %     | m    | 90 % | 95 %  | 97,5 % | 99 %  |
|------|---------|----------|----------|----------|------|------|-------|--------|-------|
| 0.10 | 7960.20 | 12634.52 | 18479.07 | 28374.45 | 0.51 | 9.45 | 14.89 | 21.58  | 32.28 |
| 0.11 | 5728.15 | 9170.10  | 13376.54 | 20238.61 | 0.52 | 8.31 | 13.09 | 19.16  | 28.90 |
| 0.12 | 4252.00 | 6767.40  | 9903.62  | 15165.82 | 0.53 | 7.39 | 11.66 | 17.15  | 26.07 |
| 0.13 | 3188.75 | 5065.69  | 7485.84  | 11406.66 | 0.54 | 6.58 | 10.48 | 15.31  | 23.28 |
| 0.14 | 2481.31 | 3906.64  | 5690.47  | 8741.36  | 0.55 | 5.90 | 9.34  | 13.52  | 20.56 |
| 0.15 | 1940.64 | 3085.68  | 4438.66  | 6839.27  | 0.56 | 5.26 | 8.27  | 11.96  | 18.22 |
| 0.16 | 1536.69 | 2445.38  | 3598.85  | 5373.62  | 0.57 | 4.66 | 7.33  | 10.69  | 16.20 |
| 0.17 | 1228.98 | 1961.59  | 2911.77  | 4391.18  | 0.58 | 4.15 | 6.51  | 9.42   | 14.25 |
| 0.18 | 992.65  | 1582.41  | 2311.96  | 3549.79  | 0.59 | 3.72 | 5.82  | 8.42   | 12.52 |
| 0.19 | 802.34  | 1291.96  | 1889.97  | 2885.29  | 0.60 | 3.30 | 5.14  | 7.49   | 11.15 |
| 0.20 | 665.58  | 1061.67  | 1546.96  | 2365.65  | 0.61 | 2.94 | 4.57  | 6.54   | 9.77  |
| 0.21 | 550.27  | 884.64   | 1301.76  | 1958.51  | 0.62 | 2.61 | 4.05  | 5.79   | 8.63  |
| 0.22 | 458.11  | 729.00   | 1068.14  | 1647.38  | 0.63 | 2.31 | 3.58  | 5.14   | 7.62  |
| 0.23 | 385.16  | 616.83   | 899.36   | 1375.76  | 0.64 | 2.03 | 3.16  | 4.54   | 6.74  |
| 0.24 | 323.11  | 518.55   | 762.43   | 1166.19  | 0.65 | 1.78 | 2.75  | 3.97   | 5.87  |
| 0.25 | 274.08  | 442.06   | 656.83   | 992.84   | 0.66 | 1.57 | 2.42  | 3.44   | 5.12  |
| 0.26 | 234.65  | 374.13   | 552.62   | 845.89   | 0.67 | 1.39 | 2.11  | 3.02   | 4.47  |
| 0.27 | 201.08  | 321.75   | 472.13   | 734.07   | 0.68 | 1.22 | 1.86  | 2.63   | 3.89  |
| 0.28 | 173.13  | 275.46   | 409.33   | 634.48   | 0.69 | 1.06 | 1.62  | 2.30   | 3.38  |
| 0.29 | 147.82  | 238.21   | 348.24   | 538.52   | 0.70 | 0.94 | 1.42  | 2.01   | 2.98  |
| 0.30 | 128.88  | 206.02   | 301.40   | 464.28   | 0.71 | 0.81 | 1.25  | 1.76   | 2.59  |
| 0.31 | 111.50  | 178.91   | 262.63   | 392.66   | 0.72 | 0.71 | 1.08  | 1.52   | 2.21  |
| 0.32 | 97.79   | 155.53   | 229.57   | 345.46   | 0.73 | 0.62 | 0.94  | 1.30   | 1.90  |
| 0.33 | 84.71   | 135.58   | 197.95   | 300.64   | 0.74 | 0.53 | 0.81  | 1.13   | 1.64  |
| 0.34 | 73.83   | 118.68   | 174.80   | 267.75   | 0.75 | 0.46 | 0.69  | 0.97   | 1.41  |
| 0.35 | 64.86   | 104.68   | 154.61   | 236.39   | 0.76 | 0.40 | 0.59  | 0.83   | 1.20  |
| 0.36 | 57.38   | 92.11    | 134.37   | 207.39   | 0.77 | 0.34 | 0.51  | 0.70   | 1.00  |
| 0.37 | 50.53   | 81.59    | 118.54   | 180.13   | 0.78 | 0.29 | 0.43  | 0.60   | 0.83  |
| 0.38 | 44.34   | 70.49    | 104.41   | 157.37   | 0.79 | 0.24 | 0.36  | 0.50   | 0.70  |
| 0.39 | 39.10   | 62.58    | 91.74    | 137.54   | 0.80 | 0.21 | 0.30  | 0.42   | 0.60  |
| 0.40 | 34.60   | 55.24    | 80.45    | 121.68   | 0.81 | 0.17 | 0.26  | 0.35   | 0.50  |
| 0.41 | 30.64   | 48.95    | 71.03    | 107.57   | 0.82 | 0.15 | 0.21  | 0.29   | 0.41  |
| 0.42 | 27.16   | 43.25    | 62.88    | 95.01    | 0.83 | 0.12 | 0.18  | 0.24   | 0.34  |
| 0.43 | 24.10   | 38.15    | 55.87    | 85.10    | 0.84 | 0.10 | 0.15  | 0.20   | 0.28  |
| 0.44 | 21.21   | 34.10    | 49.25    | 74.71    | 0.85 | 0.08 | 0.12  | 0.16   | 0.23  |
| 0.45 | 18.90   | 30.23    | 43.78    | 66.95    | 0.86 | 0.07 | 0.10  | 0.13   | 0.18  |
| 0.46 | 16.95   | 27.05    | 39.11    | 59.35    | 0.87 | 0.06 | 0.08  | 0.11   | 0.14  |
| 0.47 | 15.05   | 23.81    | 34.84    | 52.75    | 0.88 | 0.05 | 0.07  | 0.09   | 0.11  |
| 0.48 | 13.40   | 21.21    | 30.86    | 46.99    | 0.89 | 0.04 | 0.05  | 0.07   | 0.09  |
| 0.49 | 11.90   | 18.84    | 27.32    | 41.19    | 0.90 | 0.03 | 0.05  | 0.06   | 0.07  |
| 0.50 | 10.56   | 16.67    | 24.17    | 36.75    |      |      |       |        |       |

Table S242: Critical values for detector  $\hat{H}_{mov}^{m,0.2}$  with windows size  $n = 0.2$ , and FM-OLS and D-OLS estimation in a model with intercept and linear trend. The number of integrated regressors is 3 and the highest power of  $x_{kt}$  is 1.

| m    | 90 %     | 95 %     | 97,5 %   | 99 %     | m    | 90 %  | 95 %  | 97,5 % | 99 %  |
|------|----------|----------|----------|----------|------|-------|-------|--------|-------|
| 0.10 | 15749.22 | 26228.55 | 39781.88 | 64076.76 | 0.51 | 18.50 | 30.64 | 45.69  | 72.67 |
| 0.11 | 11397.46 | 18631.80 | 28644.24 | 46156.05 | 0.52 | 16.45 | 27.02 | 40.78  | 65.39 |
| 0.12 | 8328.28  | 13770.82 | 20978.55 | 33444.99 | 0.53 | 14.60 | 24.14 | 36.44  | 57.49 |
| 0.13 | 6302.62  | 10423.01 | 15809.63 | 25246.45 | 0.54 | 13.00 | 21.42 | 32.74  | 51.09 |
| 0.14 | 4842.69  | 7932.13  | 12063.08 | 19246.89 | 0.55 | 11.54 | 19.01 | 29.33  | 45.20 |
| 0.15 | 3794.05  | 6269.82  | 9578.01  | 15336.10 | 0.56 | 10.33 | 17.02 | 26.05  | 40.32 |
| 0.16 | 2998.25  | 5003.16  | 7554.39  | 12012.67 | 0.57 | 9.22  | 15.08 | 22.93  | 36.19 |
| 0.17 | 2418.65  | 3964.06  | 6069.97  | 9497.96  | 0.58 | 8.20  | 13.36 | 20.14  | 31.84 |
| 0.18 | 1935.59  | 3199.19  | 4903.60  | 7754.89  | 0.59 | 7.29  | 11.83 | 17.69  | 28.04 |
| 0.19 | 1577.07  | 2592.76  | 3954.64  | 6361.06  | 0.60 | 6.48  | 10.52 | 15.69  | 24.81 |
| 0.20 | 1285.15  | 2126.33  | 3223.06  | 5286.66  | 0.61 | 5.76  | 9.35  | 13.86  | 21.79 |
| 0.21 | 1066.67  | 1749.60  | 2668.90  | 4312.26  | 0.62 | 5.10  | 8.28  | 12.32  | 19.30 |
| 0.22 | 880.70   | 1474.30  | 2204.82  | 3596.23  | 0.63 | 4.54  | 7.37  | 10.78  | 17.12 |
| 0.23 | 746.45   | 1227.18  | 1895.62  | 3010.96  | 0.64 | 4.02  | 6.48  | 9.56   | 15.10 |
| 0.24 | 631.92   | 1048.74  | 1600.33  | 2546.28  | 0.65 | 3.54  | 5.69  | 8.44   | 13.33 |
| 0.25 | 536.54   | 882.24   | 1344.36  | 2158.02  | 0.66 | 3.11  | 5.03  | 7.43   | 11.59 |
| 0.26 | 455.72   | 757.04   | 1155.13  | 1846.66  | 0.67 | 2.75  | 4.42  | 6.59   | 10.04 |
| 0.27 | 391.60   | 651.41   | 992.40   | 1569.80  | 0.68 | 2.41  | 3.90  | 5.74   | 8.78  |
| 0.28 | 335.06   | 564.66   | 863.31   | 1365.41  | 0.69 | 2.11  | 3.41  | 4.98   | 7.67  |
| 0.29 | 290.37   | 488.03   | 744.70   | 1194.12  | 0.70 | 1.85  | 2.95  | 4.33   | 6.68  |
| 0.30 | 251.66   | 421.94   | 645.85   | 1038.20  | 0.71 | 1.63  | 2.57  | 3.75   | 5.78  |
| 0.31 | 219.40   | 364.99   | 562.70   | 898.03   | 0.72 | 1.42  | 2.24  | 3.28   | 5.06  |
| 0.32 | 191.08   | 316.00   | 484.94   | 774.38   | 0.73 | 1.23  | 1.94  | 2.85   | 4.30  |
| 0.33 | 166.97   | 276.81   | 420.88   | 674.83   | 0.74 | 1.07  | 1.68  | 2.44   | 3.67  |
| 0.34 | 145.46   | 240.41   | 363.16   | 588.99   | 0.75 | 0.93  | 1.45  | 2.10   | 3.15  |
| 0.35 | 127.21   | 212.64   | 320.33   | 513.43   | 0.76 | 0.80  | 1.24  | 1.80   | 2.71  |
| 0.36 | 112.28   | 187.01   | 278.58   | 443.10   | 0.77 | 0.69  | 1.07  | 1.54   | 2.29  |
| 0.37 | 98.74    | 164.18   | 249.15   | 398.76   | 0.78 | 0.59  | 0.91  | 1.32   | 1.95  |
| 0.38 | 86.80    | 145.31   | 218.77   | 353.03   | 0.79 | 0.51  | 0.77  | 1.10   | 1.65  |
| 0.39 | 76.69    | 128.02   | 195.03   | 310.64   | 0.80 | 0.43  | 0.65  | 0.93   | 1.37  |
| 0.40 | 67.93    | 113.07   | 172.53   | 274.21   | 0.81 | 0.36  | 0.55  | 0.78   | 1.15  |
| 0.41 | 60.43    | 100.99   | 152.74   | 241.32   | 0.82 | 0.30  | 0.46  | 0.65   | 0.96  |
| 0.42 | 53.59    | 89.45    | 135.29   | 213.24   | 0.83 | 0.25  | 0.38  | 0.54   | 0.79  |
| 0.43 | 47.81    | 79.37    | 120.63   | 187.48   | 0.84 | 0.21  | 0.32  | 0.45   | 0.66  |
| 0.44 | 42.47    | 70.16    | 107.34   | 168.86   | 0.85 | 0.17  | 0.26  | 0.37   | 0.53  |
| 0.45 | 37.49    | 62.37    | 95.17    | 149.59   | 0.86 | 0.14  | 0.22  | 0.30   | 0.43  |
| 0.46 | 33.37    | 55.46    | 83.67    | 132.92   | 0.87 | 0.12  | 0.18  | 0.24   | 0.34  |
| 0.47 | 29.80    | 49.24    | 74.76    | 118.20   | 0.88 | 0.10  | 0.14  | 0.19   | 0.27  |
| 0.48 | 26.48    | 43.77    | 66.28    | 104.94   | 0.89 | 0.08  | 0.11  | 0.15   | 0.22  |
| 0.49 | 23.37    | 38.96    | 58.61    | 91.84    | 0.90 | 0.06  | 0.09  | 0.12   | 0.17  |
| 0.50 | 20.78    | 34.58    | 51.29    | 81.25    |      |       |       |        |       |

Table S243: Critical values for detector  $\hat{H}_{mov}^{m,0.2}$  with windows size  $n = 0.2$ , and IM-OLS estimation in a model with intercept and linear trend. The number of integrated regressors is 3 and the highest power of  $x_{kt}$  is 1.

| m    | 90 %    | 95 %     | 97,5 %   | 99 %     | m    | 90 %  | 95 %  | 97,5 % | 99 %  |
|------|---------|----------|----------|----------|------|-------|-------|--------|-------|
| 0.10 | 9056.24 | 14455.99 | 21258.03 | 32855.53 | 0.51 | 10.47 | 16.54 | 23.98  | 35.74 |
| 0.11 | 6543.35 | 10535.46 | 15420.54 | 23348.56 | 0.52 | 9.17  | 14.50 | 21.11  | 31.78 |
| 0.12 | 4879.64 | 7789.77  | 11450.44 | 17683.75 | 0.53 | 8.15  | 12.83 | 18.82  | 28.62 |
| 0.13 | 3662.60 | 5836.99  | 8687.97  | 13349.24 | 0.54 | 7.22  | 11.50 | 16.73  | 25.47 |
| 0.14 | 2856.57 | 4523.07  | 6625.87  | 10260.96 | 0.55 | 6.47  | 10.22 | 14.82  | 22.38 |
| 0.15 | 2243.81 | 3589.51  | 5195.56  | 8071.18  | 0.56 | 5.74  | 9.00  | 13.02  | 19.67 |
| 0.16 | 1784.24 | 2856.93  | 4211.15  | 6349.61  | 0.57 | 5.06  | 7.94  | 11.59  | 17.51 |
| 0.17 | 1427.85 | 2291.54  | 3421.20  | 5180.62  | 0.58 | 4.49  | 7.03  | 10.12  | 15.27 |
| 0.18 | 1152.80 | 1849.50  | 2716.23  | 4169.22  | 0.59 | 4.00  | 6.25  | 9.05   | 13.39 |
| 0.19 | 934.68  | 1514.49  | 2226.39  | 3417.19  | 0.60 | 3.54  | 5.50  | 8.00   | 11.93 |
| 0.20 | 775.03  | 1242.60  | 1821.31  | 2789.79  | 0.61 | 3.14  | 4.89  | 6.97   | 10.37 |
| 0.21 | 640.18  | 1037.36  | 1530.87  | 2313.10  | 0.62 | 2.77  | 4.29  | 6.14   | 9.16  |
| 0.22 | 533.97  | 853.90   | 1256.08  | 1937.38  | 0.63 | 2.44  | 3.79  | 5.43   | 8.00  |
| 0.23 | 449.26  | 721.93   | 1055.37  | 1621.83  | 0.64 | 2.14  | 3.32  | 4.76   | 7.04  |
| 0.24 | 376.57  | 605.55   | 894.48   | 1371.18  | 0.65 | 1.87  | 2.87  | 4.16   | 6.13  |
| 0.25 | 318.50  | 516.72   | 767.21   | 1170.21  | 0.66 | 1.64  | 2.52  | 3.57   | 5.28  |
| 0.26 | 272.86  | 437.74   | 647.34   | 994.36   | 0.67 | 1.45  | 2.19  | 3.12   | 4.62  |
| 0.27 | 234.57  | 376.37   | 554.01   | 858.02   | 0.68 | 1.26  | 1.92  | 2.71   | 4.00  |
| 0.28 | 201.50  | 322.32   | 480.35   | 744.53   | 0.69 | 1.09  | 1.67  | 2.35   | 3.45  |
| 0.29 | 171.97  | 277.77   | 407.33   | 631.67   | 0.70 | 0.96  | 1.45  | 2.05   | 3.04  |
| 0.30 | 149.38  | 240.62   | 349.84   | 542.77   | 0.71 | 0.83  | 1.27  | 1.79   | 2.62  |
| 0.31 | 129.14  | 208.79   | 305.57   | 459.73   | 0.72 | 0.72  | 1.10  | 1.55   | 2.23  |
| 0.32 | 113.20  | 181.29   | 266.47   | 402.18   | 0.73 | 0.63  | 0.95  | 1.32   | 1.91  |
| 0.33 | 98.03   | 157.13   | 229.88   | 349.04   | 0.74 | 0.54  | 0.82  | 1.14   | 1.66  |
| 0.34 | 85.29   | 137.19   | 203.10   | 312.65   | 0.75 | 0.46  | 0.70  | 0.97   | 1.41  |
| 0.35 | 74.80   | 120.79   | 178.49   | 274.29   | 0.76 | 0.40  | 0.60  | 0.83   | 1.21  |
| 0.36 | 66.09   | 106.10   | 155.56   | 240.58   | 0.77 | 0.34  | 0.51  | 0.70   | 1.01  |
| 0.37 | 57.97   | 94.22    | 136.84   | 207.50   | 0.78 | 0.29  | 0.44  | 0.60   | 0.83  |
| 0.38 | 50.88   | 81.12    | 120.01   | 180.86   | 0.79 | 0.25  | 0.37  | 0.50   | 0.71  |
| 0.39 | 44.79   | 71.91    | 105.35   | 158.22   | 0.80 | 0.21  | 0.31  | 0.42   | 0.60  |
| 0.40 | 39.54   | 63.13    | 92.28    | 138.17   | 0.81 | 0.18  | 0.26  | 0.35   | 0.50  |
| 0.41 | 34.96   | 55.77    | 81.35    | 122.53   | 0.82 | 0.15  | 0.22  | 0.30   | 0.42  |
| 0.42 | 30.83   | 49.21    | 71.61    | 107.97   | 0.83 | 0.13  | 0.18  | 0.25   | 0.34  |
| 0.43 | 27.35   | 43.23    | 63.56    | 95.81    | 0.84 | 0.11  | 0.15  | 0.20   | 0.28  |
| 0.44 | 24.02   | 38.66    | 55.83    | 84.43    | 0.85 | 0.09  | 0.13  | 0.17   | 0.23  |
| 0.45 | 21.35   | 34.13    | 49.56    | 75.22    | 0.86 | 0.08  | 0.11  | 0.14   | 0.18  |
| 0.46 | 19.10   | 30.38    | 44.03    | 66.60    | 0.87 | 0.07  | 0.09  | 0.11   | 0.15  |
| 0.47 | 16.88   | 26.78    | 39.12    | 59.43    | 0.88 | 0.06  | 0.07  | 0.09   | 0.12  |
| 0.48 | 15.05   | 23.77    | 34.55    | 52.29    | 0.89 | 0.05  | 0.06  | 0.08   | 0.10  |
| 0.49 | 13.29   | 21.02    | 30.55    | 45.75    | 0.90 | 0.04  | 0.06  | 0.07   | 0.09  |
| 0.50 | 11.74   | 18.54    | 26.89    | 40.70    |      |       |       |        |       |

Table S244: Critical values for detector  $\hat{H}_{mov}^{m,0.3}$  with windows size  $n = 0.3$ , and FM-OLS and D-OLS estimation in a model with intercept and linear trend. The number of integrated regressors is 3 and the highest power of  $x_{kt}$  is 1.

| m    | 90 %     | 95 %     | 97,5 %   | 99 %     | m    | 90 %  | 95 %  | 97,5 % | 99 %  |
|------|----------|----------|----------|----------|------|-------|-------|--------|-------|
| 0.10 | 17901.26 | 29755.89 | 45464.23 | 74013.33 | 0.51 | 20.53 | 33.90 | 50.66  | 80.63 |
| 0.11 | 13031.59 | 21395.73 | 32832.11 | 53041.95 | 0.52 | 18.21 | 29.91 | 45.10  | 72.06 |
| 0.12 | 9549.07  | 15849.83 | 24097.64 | 38697.70 | 0.53 | 16.15 | 26.60 | 40.13  | 63.23 |
| 0.13 | 7219.67  | 12035.69 | 18342.23 | 29391.92 | 0.54 | 14.30 | 23.52 | 35.84  | 56.01 |
| 0.14 | 5580.38  | 9192.01  | 13999.84 | 22510.15 | 0.55 | 12.67 | 20.78 | 32.03  | 49.34 |
| 0.15 | 4377.08  | 7273.48  | 11181.54 | 17945.58 | 0.56 | 11.26 | 18.54 | 28.19  | 43.78 |
| 0.16 | 3477.81  | 5829.12  | 8807.71  | 14023.23 | 0.57 | 10.01 | 16.36 | 24.90  | 39.05 |
| 0.17 | 2802.42  | 4619.28  | 7079.28  | 11132.98 | 0.58 | 8.87  | 14.44 | 21.65  | 34.18 |
| 0.18 | 2244.07  | 3739.16  | 5753.28  | 9135.19  | 0.59 | 7.87  | 12.71 | 19.02  | 30.07 |
| 0.19 | 1826.13  | 3015.94  | 4621.27  | 7488.07  | 0.60 | 6.96  | 11.25 | 16.80  | 26.41 |
| 0.20 | 1495.47  | 2479.28  | 3783.67  | 6215.45  | 0.61 | 6.17  | 9.99  | 14.76  | 23.26 |
| 0.21 | 1239.30  | 2041.45  | 3123.39  | 5085.06  | 0.62 | 5.43  | 8.81  | 13.06  | 20.40 |
| 0.22 | 1026.02  | 1721.42  | 2595.11  | 4246.46  | 0.63 | 4.81  | 7.79  | 11.44  | 18.00 |
| 0.23 | 867.53   | 1437.17  | 2226.27  | 3542.04  | 0.64 | 4.24  | 6.85  | 10.08  | 15.87 |
| 0.24 | 734.28   | 1224.45  | 1877.59  | 3001.29  | 0.65 | 3.72  | 5.97  | 8.82   | 13.89 |
| 0.25 | 623.01   | 1029.71  | 1575.37  | 2536.41  | 0.66 | 3.27  | 5.27  | 7.71   | 12.07 |
| 0.26 | 529.48   | 882.18   | 1349.79  | 2166.81  | 0.67 | 2.87  | 4.59  | 6.84   | 10.40 |
| 0.27 | 455.96   | 761.41   | 1161.95  | 1841.90  | 0.68 | 2.50  | 4.04  | 5.95   | 9.07  |
| 0.28 | 388.99   | 659.37   | 1009.99  | 1595.63  | 0.69 | 2.19  | 3.51  | 5.12   | 7.88  |
| 0.29 | 336.72   | 567.97   | 868.10   | 1398.56  | 0.70 | 1.91  | 3.03  | 4.44   | 6.82  |
| 0.30 | 291.21   | 490.54   | 754.57   | 1210.68  | 0.71 | 1.67  | 2.63  | 3.82   | 5.88  |
| 0.31 | 254.03   | 427.32   | 652.16   | 1044.57  | 0.72 | 1.45  | 2.28  | 3.33   | 5.15  |
| 0.32 | 221.08   | 367.41   | 563.30   | 903.99   | 0.73 | 1.25  | 1.97  | 2.89   | 4.36  |
| 0.33 | 192.46   | 321.20   | 489.35   | 787.53   | 0.74 | 1.09  | 1.70  | 2.48   | 3.71  |
| 0.34 | 167.81   | 277.08   | 421.85   | 683.80   | 0.75 | 0.94  | 1.47  | 2.12   | 3.17  |
| 0.35 | 146.73   | 245.24   | 369.66   | 592.31   | 0.76 | 0.81  | 1.25  | 1.81   | 2.72  |
| 0.36 | 129.13   | 215.21   | 322.34   | 511.70   | 0.77 | 0.69  | 1.07  | 1.55   | 2.30  |
| 0.37 | 113.53   | 188.61   | 286.56   | 458.98   | 0.78 | 0.59  | 0.91  | 1.32   | 1.95  |
| 0.38 | 99.19    | 166.69   | 251.10   | 407.47   | 0.79 | 0.51  | 0.78  | 1.11   | 1.65  |
| 0.39 | 87.59    | 146.99   | 223.54   | 357.45   | 0.80 | 0.43  | 0.65  | 0.93   | 1.38  |
| 0.40 | 77.68    | 129.37   | 197.13   | 313.20   | 0.81 | 0.36  | 0.55  | 0.78   | 1.15  |
| 0.41 | 68.88    | 115.56   | 173.58   | 275.59   | 0.82 | 0.30  | 0.46  | 0.65   | 0.96  |
| 0.42 | 61.01    | 101.83   | 154.13   | 241.26   | 0.83 | 0.26  | 0.38  | 0.54   | 0.79  |
| 0.43 | 54.17    | 90.21    | 137.05   | 212.03   | 0.84 | 0.21  | 0.32  | 0.45   | 0.66  |
| 0.44 | 47.91    | 79.40    | 121.54   | 191.80   | 0.85 | 0.18  | 0.27  | 0.37   | 0.54  |
| 0.45 | 42.28    | 70.25    | 107.11   | 169.20   | 0.86 | 0.15  | 0.22  | 0.30   | 0.43  |
| 0.46 | 37.50    | 62.57    | 94.19    | 150.06   | 0.87 | 0.12  | 0.18  | 0.24   | 0.34  |
| 0.47 | 33.44    | 55.08    | 83.78    | 132.41   | 0.88 | 0.10  | 0.14  | 0.19   | 0.28  |
| 0.48 | 29.60    | 48.87    | 73.97    | 117.09   | 0.89 | 0.08  | 0.11  | 0.16   | 0.22  |
| 0.49 | 26.14    | 43.46    | 65.33    | 102.09   | 0.90 | 0.06  | 0.09  | 0.12   | 0.17  |
| 0.50 | 23.12    | 38.45    | 57.02    | 90.17    |      |       |       |        |       |

Table S245: Critical values for detector  $\hat{H}_{mov}^{m,0.3}$  with windows size  $n = 0.3$ , and IM-OLS estimation in a model with intercept and linear trend. The number of integrated regressors is 3 and the highest power of  $x_{kt}$  is 1.

| m    | 90 %    | 95 %     | 97,5 %   | 99 %     | m    | 90 % | 95 %  | 97,5 % | 99 %  |
|------|---------|----------|----------|----------|------|------|-------|--------|-------|
| 0.10 | 7370.86 | 18258.50 | 40291.60 | 98341.27 | 0.51 | 7.93 | 17.10 | 33.76  | 73.85 |
| 0.11 | 5369.28 | 13055.46 | 28246.64 | 68686.14 | 0.52 | 7.05 | 14.91 | 29.60  | 65.86 |
| 0.12 | 3933.83 | 9696.19  | 20735.81 | 50652.91 | 0.53 | 6.27 | 13.35 | 26.04  | 56.50 |
| 0.13 | 2930.23 | 7270.67  | 15644.43 | 37308.59 | 0.54 | 5.58 | 11.95 | 22.93  | 49.38 |
| 0.14 | 2219.27 | 5608.81  | 11814.67 | 28121.24 | 0.55 | 4.96 | 10.42 | 20.29  | 43.32 |
| 0.15 | 1722.30 | 4419.94  | 9270.50  | 21688.89 | 0.56 | 4.41 | 9.24  | 17.93  | 37.19 |
| 0.16 | 1376.11 | 3454.41  | 7379.26  | 16871.28 | 0.57 | 3.91 | 8.26  | 15.60  | 33.06 |
| 0.17 | 1097.67 | 2725.15  | 5801.62  | 13525.46 | 0.58 | 3.47 | 7.29  | 13.62  | 29.33 |
| 0.18 | 871.56  | 2191.78  | 4641.15  | 10988.68 | 0.59 | 3.06 | 6.36  | 11.94  | 25.71 |
| 0.19 | 715.81  | 1790.52  | 3760.53  | 8698.01  | 0.60 | 2.75 | 5.61  | 10.63  | 22.93 |
| 0.20 | 588.96  | 1461.24  | 3083.52  | 7362.22  | 0.61 | 2.45 | 5.03  | 9.41   | 20.31 |
| 0.21 | 478.23  | 1206.98  | 2536.72  | 6060.22  | 0.62 | 2.16 | 4.37  | 8.24   | 18.00 |
| 0.22 | 402.71  | 990.62   | 2126.56  | 5022.21  | 0.63 | 1.91 | 3.82  | 7.23   | 15.32 |
| 0.23 | 342.52  | 842.13   | 1811.74  | 4137.45  | 0.64 | 1.69 | 3.37  | 6.35   | 13.63 |
| 0.24 | 288.13  | 694.75   | 1509.05  | 3510.26  | 0.65 | 1.50 | 2.92  | 5.56   | 11.58 |
| 0.25 | 242.70  | 592.08   | 1281.73  | 3016.23  | 0.66 | 1.33 | 2.56  | 4.78   | 10.28 |
| 0.26 | 209.27  | 504.60   | 1080.29  | 2489.22  | 0.67 | 1.17 | 2.25  | 4.17   | 8.92  |
| 0.27 | 178.51  | 427.38   | 910.23   | 2098.98  | 0.68 | 1.02 | 2.00  | 3.60   | 7.45  |
| 0.28 | 153.27  | 364.44   | 782.90   | 1818.61  | 0.69 | 0.91 | 1.75  | 3.16   | 6.46  |
| 0.29 | 130.13  | 318.36   | 670.27   | 1579.84  | 0.70 | 0.79 | 1.50  | 2.70   | 5.51  |
| 0.30 | 112.54  | 270.63   | 568.54   | 1337.67  | 0.71 | 0.70 | 1.30  | 2.31   | 4.66  |
| 0.31 | 95.99   | 232.96   | 482.41   | 1145.11  | 0.72 | 0.61 | 1.14  | 1.99   | 4.02  |
| 0.32 | 83.20   | 200.68   | 418.97   | 999.28   | 0.73 | 0.53 | 0.98  | 1.70   | 3.37  |
| 0.33 | 72.29   | 176.29   | 367.62   | 847.30   | 0.74 | 0.47 | 0.84  | 1.44   | 2.78  |
| 0.34 | 62.76   | 148.39   | 316.49   | 723.36   | 0.75 | 0.40 | 0.72  | 1.22   | 2.41  |
| 0.35 | 54.78   | 130.84   | 272.89   | 636.77   | 0.76 | 0.35 | 0.63  | 1.07   | 2.01  |
| 0.36 | 48.43   | 114.90   | 236.62   | 541.43   | 0.77 | 0.30 | 0.53  | 0.89   | 1.67  |
| 0.37 | 42.64   | 99.61    | 205.19   | 478.06   | 0.78 | 0.26 | 0.45  | 0.75   | 1.40  |
| 0.38 | 37.62   | 87.70    | 178.87   | 409.10   | 0.79 | 0.22 | 0.38  | 0.61   | 1.13  |
| 0.39 | 33.07   | 75.71    | 156.53   | 355.47   | 0.80 | 0.19 | 0.32  | 0.52   | 0.93  |
| 0.40 | 29.58   | 67.20    | 137.38   | 314.55   | 0.81 | 0.16 | 0.27  | 0.43   | 0.77  |
| 0.41 | 26.14   | 58.73    | 120.75   | 276.25   | 0.82 | 0.13 | 0.22  | 0.35   | 0.62  |
| 0.42 | 23.06   | 51.63    | 106.03   | 243.04   | 0.83 | 0.11 | 0.18  | 0.29   | 0.49  |
| 0.43 | 20.30   | 45.34    | 93.14    | 212.81   | 0.84 | 0.10 | 0.15  | 0.23   | 0.40  |
| 0.44 | 18.18   | 40.22    | 81.75    | 185.17   | 0.85 | 0.08 | 0.12  | 0.19   | 0.31  |
| 0.45 | 16.07   | 35.37    | 71.63    | 162.57   | 0.86 | 0.06 | 0.10  | 0.15   | 0.25  |
| 0.46 | 14.13   | 31.49    | 63.59    | 140.28   | 0.87 | 0.05 | 0.08  | 0.12   | 0.18  |
| 0.47 | 12.64   | 27.49    | 55.29    | 121.78   | 0.88 | 0.04 | 0.06  | 0.09   | 0.14  |
| 0.48 | 11.21   | 24.63    | 49.81    | 110.30   | 0.89 | 0.03 | 0.05  | 0.07   | 0.11  |
| 0.49 | 9.91    | 21.59    | 43.50    | 98.40    | 0.90 | 0.03 | 0.04  | 0.05   | 0.08  |
| 0.50 | 8.76    | 19.27    | 38.45    | 83.56    |      |      |       |        |       |

Table S246: Critical values for detector  $\hat{H}_{mov}^{m,0.1}$  with windows size  $n = 0.1$ , and FM-OLS and D-OLS estimation in a model with intercept. The number of integrated regressors is 3 and the highest power of  $x_{kt}$  is 2.

| m    | 90 %     | 95 %     | 97,5 %    | 99 %      | m    | 90 %  | 95 %  | 97,5 % | 99 %   |
|------|----------|----------|-----------|-----------|------|-------|-------|--------|--------|
| 0.10 | 18208.37 | 48116.19 | 109043.95 | 273660.95 | 0.51 | 18.64 | 43.37 | 89.97  | 209.44 |
| 0.11 | 13082.95 | 34058.74 | 77288.50  | 191436.07 | 0.52 | 16.56 | 38.63 | 80.26  | 188.89 |
| 0.12 | 9912.05  | 25824.90 | 57094.82  | 146005.89 | 0.53 | 14.81 | 33.91 | 70.03  | 168.27 |
| 0.13 | 7402.39  | 19558.11 | 43693.15  | 107980.44 | 0.54 | 13.07 | 30.01 | 61.80  | 152.72 |
| 0.14 | 5688.52  | 14835.98 | 33481.18  | 80967.64  | 0.55 | 11.54 | 26.69 | 55.54  | 133.63 |
| 0.15 | 4390.12  | 11537.56 | 25861.80  | 63585.07  | 0.56 | 10.24 | 23.69 | 49.31  | 113.99 |
| 0.16 | 3411.56  | 8944.68  | 20652.31  | 51745.01  | 0.57 | 9.04  | 20.88 | 43.07  | 100.77 |
| 0.17 | 2734.65  | 7062.52  | 16143.86  | 41410.68  | 0.58 | 8.03  | 18.38 | 38.05  | 89.24  |
| 0.18 | 2173.40  | 5631.07  | 12745.03  | 33942.37  | 0.59 | 7.12  | 16.19 | 33.25  | 78.33  |
| 0.19 | 1750.10  | 4681.15  | 10586.24  | 26723.00  | 0.60 | 6.33  | 14.26 | 29.33  | 67.52  |
| 0.20 | 1439.48  | 3798.84  | 8460.94   | 21846.62  | 0.61 | 5.66  | 12.47 | 25.79  | 58.80  |
| 0.21 | 1182.06  | 3047.49  | 6901.86   | 16999.03  | 0.62 | 5.02  | 11.03 | 22.60  | 50.35  |
| 0.22 | 979.51   | 2538.40  | 5735.54   | 14341.94  | 0.63 | 4.45  | 9.64  | 19.86  | 44.58  |
| 0.23 | 826.15   | 2114.18  | 4824.52   | 12196.57  | 0.64 | 3.90  | 8.42  | 17.25  | 38.53  |
| 0.24 | 690.79   | 1805.80  | 4022.06   | 9938.86   | 0.65 | 3.46  | 7.46  | 14.88  | 33.26  |
| 0.25 | 585.36   | 1527.38  | 3454.60   | 8617.29   | 0.66 | 3.02  | 6.46  | 12.77  | 29.40  |
| 0.26 | 499.67   | 1311.25  | 2926.52   | 7364.11   | 0.67 | 2.67  | 5.62  | 10.96  | 25.76  |
| 0.27 | 428.39   | 1121.56  | 2454.48   | 6191.22   | 0.68 | 2.33  | 4.87  | 9.51   | 21.53  |
| 0.28 | 367.17   | 937.56   | 2099.23   | 5313.26   | 0.69 | 2.06  | 4.25  | 8.28   | 18.54  |
| 0.29 | 316.28   | 801.39   | 1791.76   | 4466.23   | 0.70 | 1.80  | 3.67  | 7.06   | 16.29  |
| 0.30 | 269.45   | 687.63   | 1539.87   | 4030.86   | 0.71 | 1.58  | 3.18  | 6.15   | 13.70  |
| 0.31 | 231.81   | 589.51   | 1322.76   | 3385.28   | 0.72 | 1.39  | 2.75  | 5.19   | 11.46  |
| 0.32 | 200.69   | 510.41   | 1146.93   | 2917.15   | 0.73 | 1.20  | 2.39  | 4.46   | 9.67   |
| 0.33 | 174.76   | 440.95   | 988.20    | 2516.92   | 0.74 | 1.05  | 2.07  | 3.75   | 8.06   |
| 0.34 | 153.47   | 380.14   | 846.55    | 2138.18   | 0.75 | 0.91  | 1.75  | 3.21   | 6.74   |
| 0.35 | 135.17   | 332.10   | 726.59    | 1824.91   | 0.76 | 0.79  | 1.51  | 2.73   | 5.69   |
| 0.36 | 115.89   | 291.24   | 636.20    | 1553.35   | 0.77 | 0.68  | 1.28  | 2.30   | 4.77   |
| 0.37 | 102.10   | 253.63   | 553.54    | 1362.00   | 0.78 | 0.58  | 1.10  | 1.94   | 4.01   |
| 0.38 | 90.37    | 223.21   | 479.25    | 1183.16   | 0.79 | 0.50  | 0.92  | 1.63   | 3.26   |
| 0.39 | 79.12    | 193.68   | 419.31    | 1033.94   | 0.80 | 0.43  | 0.78  | 1.35   | 2.71   |
| 0.40 | 70.30    | 173.29   | 369.88    | 885.68    | 0.81 | 0.36  | 0.65  | 1.11   | 2.20   |
| 0.41 | 62.25    | 151.72   | 326.76    | 797.45    | 0.82 | 0.31  | 0.54  | 0.91   | 1.79   |
| 0.42 | 54.34    | 133.61   | 286.48    | 693.27    | 0.83 | 0.26  | 0.45  | 0.76   | 1.45   |
| 0.43 | 48.09    | 116.17   | 246.23    | 611.15    | 0.84 | 0.22  | 0.37  | 0.62   | 1.17   |
| 0.44 | 42.42    | 101.90   | 220.38    | 528.47    | 0.85 | 0.18  | 0.31  | 0.51   | 0.93   |
| 0.45 | 37.56    | 90.86    | 192.79    | 467.59    | 0.86 | 0.15  | 0.25  | 0.40   | 0.73   |
| 0.46 | 33.19    | 79.90    | 169.64    | 413.63    | 0.87 | 0.12  | 0.20  | 0.32   | 0.57   |
| 0.47 | 29.64    | 70.64    | 150.14    | 360.38    | 0.88 | 0.10  | 0.16  | 0.25   | 0.44   |
| 0.48 | 26.78    | 61.99    | 129.46    | 312.52    | 0.89 | 0.08  | 0.13  | 0.19   | 0.33   |
| 0.49 | 23.78    | 54.86    | 114.65    | 276.00    | 0.90 | 0.06  | 0.10  | 0.15   | 0.24   |
| 0.50 | 21.10    | 48.55    | 101.22    | 243.80    |      |       |       |        |        |

Table S247: Critical values for detector  $\hat{H}_{mov}^{m,0.1}$  with windows size  $n = 0.1$ , and IM-OLS estimation in a model with intercept. The number of integrated regressors is 3 and the highest power of  $x_{kt}$  is 2.



| m    | 90 %     | 95 %     | 97,5 %   | 99 %      | m    | 90 %  | 95 %  | 97,5 % | 99 %   |
|------|----------|----------|----------|-----------|------|-------|-------|--------|--------|
| 0.10 | 11378.89 | 28329.93 | 62779.76 | 156955.88 | 0.51 | 11.41 | 24.27 | 47.54  | 103.67 |
| 0.11 | 8254.83  | 20346.65 | 44106.06 | 108791.73 | 0.52 | 10.07 | 21.14 | 41.32  | 91.99  |
| 0.12 | 6087.05  | 15111.01 | 32438.42 | 79452.23  | 0.53 | 8.94  | 18.73 | 35.77  | 78.89  |
| 0.13 | 4498.11  | 11292.04 | 24409.67 | 58483.24  | 0.54 | 7.91  | 16.76 | 31.84  | 67.53  |
| 0.14 | 3408.00  | 8706.42  | 18476.58 | 44067.52  | 0.55 | 6.99  | 14.51 | 28.10  | 59.11  |
| 0.15 | 2646.72  | 6903.40  | 14502.71 | 34010.58  | 0.56 | 6.18  | 12.73 | 24.50  | 50.55  |
| 0.16 | 2122.13  | 5338.60  | 11387.10 | 26608.47  | 0.57 | 5.46  | 11.37 | 21.37  | 44.52  |
| 0.17 | 1688.14  | 4227.21  | 9003.36  | 21060.92  | 0.58 | 4.81  | 9.99  | 18.57  | 39.29  |
| 0.18 | 1336.47  | 3377.16  | 7259.01  | 17042.49  | 0.59 | 4.26  | 8.65  | 16.14  | 34.23  |
| 0.19 | 1101.44  | 2755.38  | 5828.34  | 13487.86  | 0.60 | 3.79  | 7.62  | 14.27  | 30.01  |
| 0.20 | 904.26   | 2250.94  | 4769.69  | 11256.49  | 0.61 | 3.35  | 6.77  | 12.47  | 26.42  |
| 0.21 | 735.87   | 1857.18  | 3932.19  | 9410.76   | 0.62 | 2.92  | 5.83  | 10.95  | 23.37  |
| 0.22 | 615.59   | 1525.77  | 3288.76  | 7723.53   | 0.63 | 2.58  | 5.09  | 9.62   | 19.72  |
| 0.23 | 524.04   | 1291.26  | 2795.49  | 6432.83   | 0.64 | 2.28  | 4.45  | 8.32   | 17.36  |
| 0.24 | 440.74   | 1065.31  | 2317.79  | 5435.86   | 0.65 | 1.99  | 3.85  | 7.17   | 14.72  |
| 0.25 | 369.68   | 903.17   | 1965.57  | 4626.08   | 0.66 | 1.75  | 3.32  | 6.10   | 12.99  |
| 0.26 | 319.31   | 771.87   | 1643.90  | 3804.80   | 0.67 | 1.54  | 2.88  | 5.33   | 11.12  |
| 0.27 | 270.80   | 647.76   | 1385.18  | 3196.57   | 0.68 | 1.33  | 2.55  | 4.54   | 9.26   |
| 0.28 | 233.19   | 555.81   | 1197.22  | 2765.67   | 0.69 | 1.17  | 2.20  | 3.93   | 8.05   |
| 0.29 | 197.89   | 480.55   | 1016.93  | 2405.71   | 0.70 | 1.01  | 1.89  | 3.32   | 6.76   |
| 0.30 | 170.85   | 410.56   | 863.41   | 2031.47   | 0.71 | 0.88  | 1.62  | 2.84   | 5.58   |
| 0.31 | 144.92   | 353.00   | 735.57   | 1713.54   | 0.72 | 0.77  | 1.39  | 2.42   | 4.73   |
| 0.32 | 126.40   | 305.93   | 638.23   | 1487.02   | 0.73 | 0.66  | 1.19  | 2.02   | 3.96   |
| 0.33 | 109.60   | 265.21   | 553.89   | 1269.58   | 0.74 | 0.57  | 1.01  | 1.70   | 3.24   |
| 0.34 | 94.38    | 224.70   | 475.53   | 1093.04   | 0.75 | 0.49  | 0.86  | 1.42   | 2.77   |
| 0.35 | 82.43    | 196.56   | 405.55   | 945.93    | 0.76 | 0.42  | 0.73  | 1.24   | 2.29   |
| 0.36 | 72.93    | 172.59   | 353.42   | 804.97    | 0.77 | 0.35  | 0.61  | 1.02   | 1.87   |
| 0.37 | 64.21    | 148.02   | 308.92   | 706.73    | 0.78 | 0.30  | 0.52  | 0.85   | 1.54   |
| 0.38 | 56.07    | 130.02   | 263.38   | 604.86    | 0.79 | 0.25  | 0.43  | 0.68   | 1.24   |
| 0.39 | 49.54    | 112.48   | 232.24   | 519.88    | 0.80 | 0.21  | 0.35  | 0.57   | 1.01   |
| 0.40 | 43.85    | 99.49    | 202.23   | 468.11    | 0.81 | 0.18  | 0.29  | 0.46   | 0.82   |
| 0.41 | 38.94    | 86.60    | 177.47   | 404.06    | 0.82 | 0.15  | 0.24  | 0.37   | 0.65   |
| 0.42 | 34.22    | 75.55    | 154.70   | 351.57    | 0.83 | 0.12  | 0.20  | 0.30   | 0.52   |
| 0.43 | 30.00    | 66.58    | 135.30   | 308.14    | 0.84 | 0.10  | 0.16  | 0.25   | 0.42   |
| 0.44 | 26.84    | 58.79    | 118.48   | 262.89    | 0.85 | 0.09  | 0.13  | 0.20   | 0.32   |
| 0.45 | 23.50    | 51.67    | 103.85   | 230.00    | 0.86 | 0.07  | 0.11  | 0.15   | 0.25   |
| 0.46 | 20.64    | 45.64    | 92.08    | 199.04    | 0.87 | 0.06  | 0.09  | 0.12   | 0.19   |
| 0.47 | 18.48    | 40.20    | 80.18    | 173.01    | 0.88 | 0.05  | 0.07  | 0.10   | 0.15   |
| 0.48 | 16.27    | 35.18    | 71.23    | 156.96    | 0.89 | 0.04  | 0.06  | 0.08   | 0.11   |
| 0.49 | 14.32    | 30.94    | 61.60    | 137.85    | 0.90 | 0.04  | 0.05  | 0.06   | 0.09   |
| 0.50 | 12.69    | 27.57    | 54.47    | 117.44    |      |       |       |        |        |

Table S248: Critical values for detector  $\hat{H}_{mov}^{m,0.2}$  with windows size  $n = 0.2$ , and FM-OLS and D-OLS estimation in a model with intercept. The number of integrated regressors is 3 and the highest power of  $x_{kt}$  is 2.

| m    | 90 %     | 95 %     | 97,5 %    | 99 %      | m    | 90 %  | 95 %  | 97,5 % | 99 %   |
|------|----------|----------|-----------|-----------|------|-------|-------|--------|--------|
| 0.10 | 27827.13 | 74871.31 | 170893.01 | 429277.54 | 0.51 | 26.59 | 61.08 | 126.37 | 293.77 |
| 0.11 | 20074.19 | 52848.89 | 121148.45 | 301193.71 | 0.52 | 23.69 | 54.48 | 113.02 | 259.49 |
| 0.12 | 15158.25 | 40065.88 | 89027.62  | 230701.12 | 0.53 | 21.09 | 47.59 | 97.59  | 231.78 |
| 0.13 | 11349.58 | 30439.71 | 68116.55  | 167469.60 | 0.54 | 18.45 | 41.99 | 85.58  | 206.94 |
| 0.14 | 8705.47  | 23055.36 | 52462.77  | 126435.11 | 0.55 | 16.26 | 37.03 | 76.24  | 185.16 |
| 0.15 | 6736.83  | 17799.65 | 40074.50  | 99547.98  | 0.56 | 14.33 | 32.81 | 67.35  | 156.38 |
| 0.16 | 5284.62  | 13816.15 | 31976.89  | 81029.57  | 0.57 | 12.57 | 28.83 | 59.02  | 135.85 |
| 0.17 | 4228.01  | 10865.69 | 25067.73  | 63918.01  | 0.58 | 11.16 | 25.00 | 52.20  | 119.72 |
| 0.18 | 3342.75  | 8716.43  | 19773.93  | 52208.84  | 0.59 | 9.86  | 22.00 | 44.99  | 104.13 |
| 0.19 | 2682.92  | 7223.63  | 16464.52  | 41916.94  | 0.60 | 8.74  | 19.37 | 39.74  | 89.05  |
| 0.20 | 2213.21  | 5820.39  | 12891.93  | 33825.38  | 0.61 | 7.74  | 16.91 | 34.38  | 77.49  |
| 0.21 | 1816.64  | 4655.88  | 10617.57  | 26278.69  | 0.62 | 6.77  | 14.82 | 29.91  | 65.86  |
| 0.22 | 1501.72  | 3872.36  | 8832.58   | 22157.27  | 0.63 | 6.01  | 12.83 | 26.04  | 57.56  |
| 0.23 | 1265.38  | 3240.32  | 7466.94   | 18649.65  | 0.64 | 5.25  | 11.13 | 22.32  | 50.32  |
| 0.24 | 1057.61  | 2771.56  | 6159.35   | 15204.81  | 0.65 | 4.60  | 9.68  | 19.15  | 42.92  |
| 0.25 | 892.57   | 2338.72  | 5267.66   | 13134.52  | 0.66 | 3.98  | 8.38  | 16.40  | 37.21  |
| 0.26 | 763.45   | 2008.61  | 4462.31   | 11263.79  | 0.67 | 3.49  | 7.19  | 13.95  | 32.19  |
| 0.27 | 651.44   | 1709.28  | 3749.94   | 9605.05   | 0.68 | 3.07  | 6.23  | 11.96  | 27.10  |
| 0.28 | 559.10   | 1425.89  | 3165.36   | 8121.09   | 0.69 | 2.67  | 5.39  | 10.33  | 22.83  |
| 0.29 | 478.73   | 1213.61  | 2731.01   | 6880.21   | 0.70 | 2.32  | 4.63  | 8.79   | 19.77  |
| 0.30 | 408.04   | 1033.47  | 2319.90   | 6101.74   | 0.71 | 2.00  | 3.98  | 7.46   | 16.29  |
| 0.31 | 350.47   | 894.04   | 2013.81   | 5099.55   | 0.72 | 1.74  | 3.42  | 6.31   | 13.80  |
| 0.32 | 303.73   | 766.59   | 1734.18   | 4436.37   | 0.73 | 1.49  | 2.93  | 5.34   | 11.40  |
| 0.33 | 263.03   | 663.23   | 1477.07   | 3744.88   | 0.74 | 1.28  | 2.48  | 4.48   | 9.48   |
| 0.34 | 231.52   | 574.59   | 1262.63   | 3253.50   | 0.75 | 1.12  | 2.10  | 3.77   | 7.74   |
| 0.35 | 201.28   | 493.25   | 1093.83   | 2713.07   | 0.76 | 0.95  | 1.78  | 3.18   | 6.53   |
| 0.36 | 174.10   | 433.54   | 950.62    | 2280.72   | 0.77 | 0.81  | 1.51  | 2.64   | 5.37   |
| 0.37 | 152.74   | 377.37   | 820.87    | 2018.32   | 0.78 | 0.68  | 1.27  | 2.23   | 4.52   |
| 0.38 | 134.22   | 331.89   | 718.67    | 1737.39   | 0.79 | 0.58  | 1.06  | 1.83   | 3.60   |
| 0.39 | 118.22   | 287.23   | 617.96    | 1517.28   | 0.80 | 0.49  | 0.87  | 1.50   | 2.94   |
| 0.40 | 103.91   | 256.56   | 550.57    | 1306.40   | 0.81 | 0.41  | 0.73  | 1.22   | 2.37   |
| 0.41 | 92.08    | 222.50   | 482.45    | 1152.12   | 0.82 | 0.34  | 0.60  | 1.00   | 1.90   |
| 0.42 | 79.98    | 196.23   | 417.44    | 1005.41   | 0.83 | 0.28  | 0.49  | 0.81   | 1.53   |
| 0.43 | 70.81    | 170.85   | 363.25    | 887.98    | 0.84 | 0.24  | 0.40  | 0.65   | 1.23   |
| 0.44 | 62.33    | 148.84   | 319.38    | 769.40    | 0.85 | 0.19  | 0.32  | 0.53   | 0.97   |
| 0.45 | 55.18    | 129.94   | 278.94    | 664.73    | 0.86 | 0.16  | 0.26  | 0.42   | 0.75   |
| 0.46 | 48.67    | 114.66   | 248.37    | 595.43    | 0.87 | 0.13  | 0.21  | 0.33   | 0.58   |
| 0.47 | 43.35    | 101.14   | 214.52    | 517.39    | 0.88 | 0.10  | 0.17  | 0.26   | 0.45   |
| 0.48 | 38.95    | 89.47    | 185.32    | 443.50    | 0.89 | 0.08  | 0.13  | 0.20   | 0.34   |
| 0.49 | 34.16    | 78.17    | 164.61    | 395.47    | 0.90 | 0.07  | 0.10  | 0.15   | 0.25   |
| 0.50 | 30.26    | 69.24    | 143.21    | 337.71    |      |       |       |        |        |

Table S249: Critical values for detector  $\hat{H}_{mov}^{m,0.2}$  with windows size  $n = 0.2$ , and IM-OLS estimation in a model with intercept. The number of integrated regressors is 3 and the highest power of  $x_{kt}$  is 2.

| m    | 90 %     | 95 %     | 97,5 %   | 99 %      | m    | 90 %  | 95 %  | 97,5 % | 99 %   |
|------|----------|----------|----------|-----------|------|-------|-------|--------|--------|
| 0.10 | 13423.41 | 33550.05 | 74652.99 | 187326.93 | 0.51 | 12.59 | 26.71 | 51.63  | 113.14 |
| 0.11 | 9751.81  | 24079.62 | 52273.64 | 130498.49 | 0.52 | 11.11 | 23.27 | 44.97  | 99.00  |
| 0.12 | 7163.93  | 17930.67 | 38689.37 | 94217.47  | 0.53 | 9.81  | 20.41 | 39.02  | 84.48  |
| 0.13 | 5322.19  | 13343.82 | 29359.43 | 69692.12  | 0.54 | 8.68  | 18.16 | 34.39  | 72.65  |
| 0.14 | 4011.91  | 10234.30 | 22022.59 | 52838.19  | 0.55 | 7.66  | 15.72 | 30.19  | 63.59  |
| 0.15 | 3119.20  | 8202.21  | 17267.91 | 40305.51  | 0.56 | 6.75  | 13.78 | 26.24  | 53.89  |
| 0.16 | 2493.43  | 6296.35  | 13411.45 | 31635.87  | 0.57 | 5.93  | 12.21 | 22.83  | 47.26  |
| 0.17 | 1979.96  | 5015.90  | 10699.78 | 25121.82  | 0.58 | 5.21  | 10.70 | 19.97  | 41.51  |
| 0.18 | 1575.33  | 3980.09  | 8551.76  | 20254.33  | 0.59 | 4.58  | 9.23  | 17.14  | 36.02  |
| 0.19 | 1297.92  | 3231.25  | 6886.38  | 15846.83  | 0.60 | 4.08  | 8.07  | 15.03  | 31.49  |
| 0.20 | 1061.81  | 2649.14  | 5628.02  | 13371.52  | 0.61 | 3.57  | 7.17  | 13.20  | 27.56  |
| 0.21 | 862.01   | 2179.63  | 4579.28  | 10886.20  | 0.62 | 3.11  | 6.16  | 11.44  | 24.22  |
| 0.22 | 719.34   | 1787.70  | 3813.50  | 9068.44   | 0.63 | 2.73  | 5.34  | 10.01  | 20.31  |
| 0.23 | 611.42   | 1509.31  | 3259.05  | 7518.86   | 0.64 | 2.40  | 4.65  | 8.63   | 17.76  |
| 0.24 | 515.16   | 1249.27  | 2728.24  | 6316.45   | 0.65 | 2.08  | 4.00  | 7.40   | 15.08  |
| 0.25 | 431.15   | 1048.76  | 2305.83  | 5356.96   | 0.66 | 1.83  | 3.44  | 6.29   | 13.29  |
| 0.26 | 372.39   | 891.18   | 1914.79  | 4422.63   | 0.67 | 1.60  | 2.97  | 5.46   | 11.39  |
| 0.27 | 316.90   | 756.81   | 1613.90  | 3725.15   | 0.68 | 1.38  | 2.62  | 4.64   | 9.42   |
| 0.28 | 271.78   | 644.44   | 1403.28  | 3207.84   | 0.69 | 1.20  | 2.25  | 4.00   | 8.20   |
| 0.29 | 230.08   | 556.87   | 1183.98  | 2779.24   | 0.70 | 1.04  | 1.93  | 3.37   | 6.84   |
| 0.30 | 198.85   | 472.77   | 996.74   | 2373.17   | 0.71 | 0.90  | 1.65  | 2.88   | 5.64   |
| 0.31 | 168.09   | 407.62   | 849.03   | 1979.19   | 0.72 | 0.78  | 1.41  | 2.45   | 4.75   |
| 0.32 | 146.16   | 350.67   | 734.03   | 1684.09   | 0.73 | 0.67  | 1.21  | 2.03   | 3.98   |
| 0.33 | 126.77   | 304.29   | 637.99   | 1452.37   | 0.74 | 0.58  | 1.02  | 1.71   | 3.25   |
| 0.34 | 109.30   | 258.09   | 541.64   | 1258.06   | 0.75 | 0.49  | 0.86  | 1.42   | 2.78   |
| 0.35 | 95.15    | 224.65   | 464.36   | 1074.29   | 0.76 | 0.42  | 0.74  | 1.24   | 2.30   |
| 0.36 | 84.11    | 197.77   | 406.00   | 916.18    | 0.77 | 0.36  | 0.62  | 1.03   | 1.88   |
| 0.37 | 73.89    | 169.77   | 350.07   | 799.65    | 0.78 | 0.30  | 0.52  | 0.86   | 1.55   |
| 0.38 | 64.26    | 148.07   | 300.81   | 681.80    | 0.79 | 0.26  | 0.43  | 0.68   | 1.24   |
| 0.39 | 56.84    | 127.47   | 261.79   | 587.46    | 0.80 | 0.22  | 0.36  | 0.57   | 1.01   |
| 0.40 | 50.07    | 112.59   | 227.95   | 522.10    | 0.81 | 0.18  | 0.30  | 0.47   | 0.82   |
| 0.41 | 44.44    | 98.16    | 199.89   | 447.92    | 0.82 | 0.16  | 0.24  | 0.38   | 0.65   |
| 0.42 | 38.71    | 85.21    | 172.52   | 391.88    | 0.83 | 0.13  | 0.21  | 0.31   | 0.52   |
| 0.43 | 33.95    | 75.14    | 150.96   | 344.40    | 0.84 | 0.12  | 0.17  | 0.25   | 0.43   |
| 0.44 | 30.30    | 66.09    | 131.66   | 293.58    | 0.85 | 0.10  | 0.14  | 0.21   | 0.33   |
| 0.45 | 26.52    | 57.74    | 115.30   | 254.02    | 0.86 | 0.09  | 0.12  | 0.17   | 0.26   |
| 0.46 | 23.26    | 50.91    | 101.91   | 219.88    | 0.87 | 0.07  | 0.10  | 0.14   | 0.21   |
| 0.47 | 20.72    | 44.64    | 88.57    | 189.54    | 0.88 | 0.06  | 0.09  | 0.12   | 0.17   |
| 0.48 | 18.24    | 39.21    | 78.26    | 172.30    | 0.89 | 0.06  | 0.08  | 0.10   | 0.14   |
| 0.49 | 15.97    | 34.41    | 68.19    | 151.17    | 0.90 | 0.05  | 0.07  | 0.09   | 0.12   |
| 0.50 | 14.08    | 30.38    | 59.63    | 127.64    |      |       |       |        |        |

Table S250: Critical values for detector  $\hat{H}_{mov}^{m,0.3}$  with windows size  $n = 0.3$ , and FM-OLS and D-OLS estimation in a model with intercept. The number of integrated regressors is 3 and the highest power of  $x_{kt}$  is 2.

| m    | 90 %     | 95 %     | 97,5 %    | 99 %      | m    | 90 %  | 95 %  | 97,5 % | 99 %   |
|------|----------|----------|-----------|-----------|------|-------|-------|--------|--------|
| 0.10 | 32874.54 | 88843.21 | 202753.33 | 508093.44 | 0.51 | 29.42 | 67.29 | 138.76 | 316.18 |
| 0.11 | 23752.66 | 62631.76 | 143093.65 | 363368.28 | 0.52 | 26.15 | 60.23 | 122.45 | 276.74 |
| 0.12 | 17804.98 | 47575.92 | 105458.49 | 277616.77 | 0.53 | 23.22 | 51.88 | 107.10 | 247.70 |
| 0.13 | 13359.86 | 35898.47 | 80385.53  | 199477.95 | 0.54 | 20.29 | 45.70 | 92.55  | 221.81 |
| 0.14 | 10233.95 | 27298.12 | 62093.95  | 149700.05 | 0.55 | 17.79 | 39.97 | 81.87  | 197.30 |
| 0.15 | 7894.03  | 20977.89 | 47550.11  | 117602.08 | 0.56 | 15.60 | 35.56 | 72.43  | 166.13 |
| 0.16 | 6241.59  | 16279.57 | 37581.31  | 96750.10  | 0.57 | 13.61 | 31.04 | 63.07  | 143.88 |
| 0.17 | 4971.12  | 12844.80 | 29658.63  | 75950.02  | 0.58 | 12.08 | 26.75 | 55.28  | 126.47 |
| 0.18 | 3933.20  | 10268.20 | 23502.15  | 62372.59  | 0.59 | 10.60 | 23.46 | 47.70  | 110.91 |
| 0.19 | 3152.18  | 8481.11  | 19332.34  | 49722.38  | 0.60 | 9.33  | 20.56 | 42.05  | 93.10  |
| 0.20 | 2589.29  | 6862.91  | 15176.74  | 39663.06  | 0.61 | 8.26  | 17.91 | 35.97  | 80.74  |
| 0.21 | 2128.75  | 5491.65  | 12454.84  | 30990.15  | 0.62 | 7.20  | 15.57 | 31.29  | 68.94  |
| 0.22 | 1760.83  | 4517.63  | 10309.10  | 25971.44  | 0.63 | 6.38  | 13.46 | 27.20  | 59.97  |
| 0.23 | 1482.74  | 3789.38  | 8733.98   | 21911.93  | 0.64 | 5.55  | 11.65 | 23.09  | 52.12  |
| 0.24 | 1235.44  | 3230.69  | 7293.80   | 17765.56  | 0.65 | 4.82  | 10.11 | 19.87  | 44.26  |
| 0.25 | 1050.65  | 2716.29  | 6141.08   | 15340.20  | 0.66 | 4.16  | 8.67  | 16.94  | 38.38  |
| 0.26 | 890.22   | 2343.11  | 5221.79   | 13179.16  | 0.67 | 3.64  | 7.44  | 14.41  | 32.92  |
| 0.27 | 760.60   | 1987.72  | 4349.85   | 11224.50  | 0.68 | 3.18  | 6.40  | 12.26  | 27.64  |
| 0.28 | 650.56   | 1655.81  | 3651.58   | 9418.11   | 0.69 | 2.75  | 5.53  | 10.57  | 23.12  |
| 0.29 | 557.72   | 1403.77  | 3156.98   | 8023.58   | 0.70 | 2.39  | 4.73  | 8.94   | 20.00  |
| 0.30 | 474.74   | 1196.36  | 2696.59   | 7061.51   | 0.71 | 2.05  | 4.05  | 7.58   | 16.56  |
| 0.31 | 406.32   | 1029.71  | 2328.09   | 5889.82   | 0.72 | 1.78  | 3.47  | 6.40   | 13.89  |
| 0.32 | 350.65   | 887.06   | 1992.33   | 5129.87   | 0.73 | 1.52  | 2.97  | 5.41   | 11.50  |
| 0.33 | 303.65   | 761.74   | 1706.10   | 4306.88   | 0.74 | 1.30  | 2.51  | 4.51   | 9.54   |
| 0.34 | 267.46   | 656.69   | 1455.23   | 3697.56   | 0.75 | 1.13  | 2.12  | 3.80   | 7.78   |
| 0.35 | 233.02   | 567.88   | 1249.07   | 3084.86   | 0.76 | 0.96  | 1.79  | 3.19   | 6.54   |
| 0.36 | 200.77   | 495.56   | 1081.30   | 2618.94   | 0.77 | 0.81  | 1.52  | 2.65   | 5.39   |
| 0.37 | 175.44   | 429.87   | 943.11    | 2276.72   | 0.78 | 0.69  | 1.28  | 2.23   | 4.52   |
| 0.38 | 154.25   | 375.62   | 814.08    | 1940.85   | 0.79 | 0.58  | 1.07  | 1.83   | 3.61   |
| 0.39 | 135.50   | 325.31   | 696.83    | 1702.49   | 0.80 | 0.49  | 0.88  | 1.50   | 2.94   |
| 0.40 | 118.91   | 291.48   | 619.97    | 1460.59   | 0.81 | 0.41  | 0.73  | 1.22   | 2.37   |
| 0.41 | 104.22   | 252.33   | 543.43    | 1285.81   | 0.82 | 0.34  | 0.60  | 1.00   | 1.90   |
| 0.42 | 90.89    | 220.43   | 470.06    | 1123.00   | 0.83 | 0.29  | 0.49  | 0.82   | 1.53   |
| 0.43 | 80.07    | 192.20   | 405.93    | 986.85    | 0.84 | 0.24  | 0.40  | 0.65   | 1.23   |
| 0.44 | 70.34    | 166.80   | 356.06    | 862.01    | 0.85 | 0.19  | 0.33  | 0.53   | 0.97   |
| 0.45 | 61.98    | 145.96   | 311.77    | 740.49    | 0.86 | 0.16  | 0.26  | 0.42   | 0.76   |
| 0.46 | 54.96    | 127.93   | 273.64    | 651.91    | 0.87 | 0.13  | 0.21  | 0.33   | 0.58   |
| 0.47 | 48.74    | 112.21   | 238.98    | 568.90    | 0.88 | 0.11  | 0.17  | 0.26   | 0.45   |
| 0.48 | 43.51    | 98.94    | 205.13    | 492.97    | 0.89 | 0.08  | 0.13  | 0.20   | 0.34   |
| 0.49 | 38.15    | 86.52    | 180.39    | 428.33    | 0.90 | 0.07  | 0.10  | 0.15   | 0.25   |
| 0.50 | 33.74    | 76.06    | 157.40    | 367.65    |      |       |       |        |        |

Table S251: Critical values for detector  $\hat{H}_{mov}^{m,0.3}$  with windows size  $n = 0.3$ , and IM-OLS estimation in a model with intercept. The number of integrated regressors is 3 and the highest power of  $x_{kt}$  is 2.

| m    | 90 %     | 95 %     | 97,5 %   | 99 %      | m    | 90 %  | 95 %  | 97,5 % | 99 %  |
|------|----------|----------|----------|-----------|------|-------|-------|--------|-------|
| 0.10 | 21161.45 | 42204.03 | 82217.78 | 178319.54 | 0.51 | 13.80 | 24.76 | 42.83  | 86.48 |
| 0.11 | 14639.45 | 29408.53 | 55240.06 | 121385.80 | 0.52 | 12.14 | 22.01 | 37.95  | 77.42 |
| 0.12 | 10560.51 | 20786.78 | 39486.61 | 87246.38  | 0.53 | 10.80 | 19.57 | 33.08  | 66.29 |
| 0.13 | 7647.75  | 15156.95 | 28308.15 | 61485.33  | 0.54 | 9.60  | 17.24 | 29.06  | 58.87 |
| 0.14 | 5763.64  | 11324.29 | 20943.75 | 44440.41  | 0.55 | 8.46  | 15.28 | 25.85  | 50.33 |
| 0.15 | 4375.77  | 8656.10  | 15990.17 | 34303.08  | 0.56 | 7.47  | 13.47 | 22.78  | 43.61 |
| 0.16 | 3400.20  | 6659.06  | 12295.27 | 26517.54  | 0.57 | 6.61  | 11.90 | 19.81  | 38.93 |
| 0.17 | 2662.67  | 5264.08  | 9507.59  | 20301.37  | 0.58 | 5.86  | 10.47 | 17.66  | 33.39 |
| 0.18 | 2095.01  | 4050.00  | 7583.35  | 16228.89  | 0.59 | 5.13  | 9.24  | 15.40  | 29.59 |
| 0.19 | 1684.19  | 3230.64  | 6012.05  | 12742.98  | 0.60 | 4.56  | 8.11  | 13.75  | 26.00 |
| 0.20 | 1344.52  | 2606.24  | 4876.53  | 10243.31  | 0.61 | 4.07  | 7.16  | 12.23  | 23.04 |
| 0.21 | 1094.80  | 2098.73  | 3886.57  | 8429.17   | 0.62 | 3.58  | 6.28  | 10.67  | 20.54 |
| 0.22 | 891.86   | 1718.56  | 3181.18  | 6911.59   | 0.63 | 3.17  | 5.51  | 9.26   | 17.67 |
| 0.23 | 749.20   | 1447.32  | 2627.77  | 5469.15   | 0.64 | 2.78  | 4.87  | 8.19   | 15.68 |
| 0.24 | 623.38   | 1190.57  | 2183.23  | 4618.75   | 0.65 | 2.40  | 4.22  | 7.16   | 13.85 |
| 0.25 | 520.26   | 1003.58  | 1835.68  | 3869.56   | 0.66 | 2.11  | 3.64  | 6.15   | 11.92 |
| 0.26 | 438.19   | 838.27   | 1526.57  | 3235.74   | 0.67 | 1.84  | 3.21  | 5.32   | 10.31 |
| 0.27 | 368.57   | 706.45   | 1269.50  | 2708.72   | 0.68 | 1.63  | 2.80  | 4.55   | 8.68  |
| 0.28 | 314.20   | 595.86   | 1083.67  | 2318.69   | 0.69 | 1.40  | 2.41  | 4.02   | 7.71  |
| 0.29 | 266.95   | 502.95   | 920.01   | 1964.40   | 0.70 | 1.22  | 2.11  | 3.44   | 6.44  |
| 0.30 | 225.86   | 430.64   | 780.00   | 1680.39   | 0.71 | 1.07  | 1.82  | 2.94   | 5.40  |
| 0.31 | 192.56   | 364.15   | 659.10   | 1412.91   | 0.72 | 0.93  | 1.57  | 2.52   | 4.71  |
| 0.32 | 166.78   | 313.93   | 564.29   | 1193.05   | 0.73 | 0.81  | 1.35  | 2.14   | 3.98  |
| 0.33 | 144.42   | 270.29   | 489.81   | 1027.45   | 0.74 | 0.69  | 1.15  | 1.81   | 3.20  |
| 0.34 | 124.41   | 232.78   | 424.52   | 891.80    | 0.75 | 0.60  | 0.99  | 1.56   | 2.78  |
| 0.35 | 107.66   | 202.64   | 366.84   | 764.57    | 0.76 | 0.52  | 0.85  | 1.34   | 2.33  |
| 0.36 | 93.14    | 177.34   | 315.75   | 656.03    | 0.77 | 0.44  | 0.72  | 1.11   | 1.90  |
| 0.37 | 81.97    | 151.67   | 269.47   | 560.66    | 0.78 | 0.37  | 0.61  | 0.95   | 1.63  |
| 0.38 | 71.60    | 133.72   | 235.30   | 491.16    | 0.79 | 0.31  | 0.50  | 0.78   | 1.32  |
| 0.39 | 62.39    | 115.40   | 210.03   | 422.20    | 0.80 | 0.27  | 0.42  | 0.65   | 1.08  |
| 0.40 | 54.84    | 102.09   | 181.19   | 373.97    | 0.81 | 0.22  | 0.36  | 0.53   | 0.89  |
| 0.41 | 47.94    | 88.55    | 158.94   | 331.59    | 0.82 | 0.19  | 0.29  | 0.44   | 0.73  |
| 0.42 | 42.22    | 77.17    | 141.29   | 285.86    | 0.83 | 0.16  | 0.24  | 0.36   | 0.57  |
| 0.43 | 37.11    | 67.41    | 120.06   | 249.98    | 0.84 | 0.13  | 0.20  | 0.29   | 0.47  |
| 0.44 | 32.62    | 59.78    | 105.75   | 216.21    | 0.85 | 0.10  | 0.16  | 0.23   | 0.37  |
| 0.45 | 28.78    | 52.67    | 92.82    | 190.44    | 0.86 | 0.08  | 0.13  | 0.18   | 0.28  |
| 0.46 | 25.50    | 46.07    | 81.27    | 166.15    | 0.87 | 0.07  | 0.10  | 0.14   | 0.22  |
| 0.47 | 22.58    | 40.58    | 71.32    | 143.93    | 0.88 | 0.05  | 0.08  | 0.11   | 0.16  |
| 0.48 | 19.86    | 36.60    | 63.93    | 128.18    | 0.89 | 0.04  | 0.06  | 0.08   | 0.12  |
| 0.49 | 17.39    | 31.99    | 56.75    | 115.05    | 0.90 | 0.03  | 0.04  | 0.06   | 0.09  |
| 0.50 | 15.55    | 28.22    | 49.59    | 98.83     |      |       |       |        |       |

Table S252: Critical values for detector  $\hat{H}_{mov}^{m,0.1}$  with windows size  $n = 0.1$ , and FM-OLS and D-OLS estimation in a model with intercept and linear trend. The number of integrated regressors is 3 and the highest power of  $x_{kt}$  is 2.

| m    | 90 %     | 95 %      | 97,5 %    | 99 %      | m    | 90 %  | 95 %  | 97,5 % | 99 %   |
|------|----------|-----------|-----------|-----------|------|-------|-------|--------|--------|
| 0.10 | 48191.69 | 101841.24 | 206312.89 | 474554.55 | 0.51 | 29.99 | 57.86 | 107.22 | 229.67 |
| 0.11 | 33317.66 | 70498.66  | 139487.51 | 321484.79 | 0.52 | 26.55 | 51.23 | 93.64  | 203.54 |
| 0.12 | 24059.90 | 50187.96  | 99322.13  | 230330.05 | 0.53 | 23.58 | 45.49 | 83.08  | 181.87 |
| 0.13 | 17738.92 | 37035.20  | 72851.24  | 164704.07 | 0.54 | 21.01 | 40.61 | 74.13  | 158.51 |
| 0.14 | 13143.52 | 27649.44  | 55330.14  | 125524.02 | 0.55 | 18.59 | 35.82 | 64.76  | 141.17 |
| 0.15 | 9974.23  | 20935.85  | 41036.65  | 94207.16  | 0.56 | 16.39 | 31.62 | 57.45  | 122.24 |
| 0.16 | 7580.05  | 16083.20  | 31935.22  | 72871.47  | 0.57 | 14.51 | 27.90 | 50.48  | 105.40 |
| 0.17 | 5943.41  | 12484.84  | 24965.08  | 56625.14  | 0.58 | 12.74 | 24.60 | 43.95  | 94.47  |
| 0.18 | 4723.35  | 9820.39   | 19531.95  | 44340.22  | 0.59 | 11.18 | 21.52 | 38.85  | 83.66  |
| 0.19 | 3733.27  | 7796.84   | 15717.32  | 36555.58  | 0.60 | 9.88  | 18.82 | 33.89  | 72.42  |
| 0.20 | 3024.78  | 6176.83   | 12520.45  | 28560.33  | 0.61 | 8.67  | 16.65 | 29.54  | 62.77  |
| 0.21 | 2419.28  | 5067.72   | 9946.03   | 22312.83  | 0.62 | 7.73  | 14.59 | 26.29  | 54.18  |
| 0.22 | 1994.49  | 4144.25   | 8151.63   | 18450.24  | 0.63 | 6.82  | 12.94 | 22.98  | 46.73  |
| 0.23 | 1641.14  | 3371.41   | 6675.26   | 14844.23  | 0.64 | 6.04  | 11.24 | 19.89  | 40.79  |
| 0.24 | 1369.30  | 2823.17   | 5474.45   | 12119.80  | 0.65 | 5.26  | 9.84  | 17.32  | 35.24  |
| 0.25 | 1143.62  | 2357.98   | 4568.19   | 10114.68  | 0.66 | 4.60  | 8.57  | 14.91  | 30.60  |
| 0.26 | 970.74   | 1990.35   | 3886.92   | 8706.77   | 0.67 | 4.01  | 7.46  | 12.97  | 26.48  |
| 0.27 | 818.54   | 1684.49   | 3303.10   | 7488.45   | 0.68 | 3.51  | 6.53  | 11.11  | 22.40  |
| 0.28 | 696.38   | 1410.34   | 2682.93   | 6262.55   | 0.69 | 3.06  | 5.60  | 9.78   | 19.74  |
| 0.29 | 595.39   | 1198.93   | 2279.54   | 5244.24   | 0.70 | 2.65  | 4.83  | 8.45   | 16.76  |
| 0.30 | 510.42   | 1015.19   | 1977.53   | 4534.05   | 0.71 | 2.30  | 4.18  | 7.31   | 14.17  |
| 0.31 | 433.23   | 876.95    | 1709.42   | 3792.11   | 0.72 | 2.01  | 3.59  | 6.21   | 12.15  |
| 0.32 | 372.07   | 756.28    | 1451.57   | 3206.47   | 0.73 | 1.73  | 3.09  | 5.31   | 10.13  |
| 0.33 | 319.32   | 646.84    | 1236.71   | 2757.85   | 0.74 | 1.49  | 2.66  | 4.48   | 8.47   |
| 0.34 | 276.52   | 555.09    | 1072.71   | 2398.77   | 0.75 | 1.28  | 2.25  | 3.76   | 7.22   |
| 0.35 | 239.32   | 479.54    | 924.49    | 2003.14   | 0.76 | 1.10  | 1.93  | 3.19   | 6.04   |
| 0.36 | 207.10   | 412.60    | 789.22    | 1734.09   | 0.77 | 0.95  | 1.66  | 2.69   | 4.94   |
| 0.37 | 181.30   | 359.46    | 687.71    | 1534.19   | 0.78 | 0.81  | 1.40  | 2.28   | 4.11   |
| 0.38 | 157.59   | 315.34    | 591.66    | 1310.66   | 0.79 | 0.69  | 1.17  | 1.90   | 3.45   |
| 0.39 | 138.67   | 272.44    | 514.32    | 1125.03   | 0.80 | 0.58  | 0.98  | 1.56   | 2.85   |
| 0.40 | 121.36   | 237.53    | 446.16    | 976.82    | 0.81 | 0.49  | 0.82  | 1.29   | 2.37   |
| 0.41 | 106.84   | 207.95    | 389.66    | 861.79    | 0.82 | 0.40  | 0.67  | 1.08   | 1.95   |
| 0.42 | 93.22    | 183.65    | 343.00    | 746.80    | 0.83 | 0.34  | 0.56  | 0.89   | 1.55   |
| 0.43 | 81.41    | 158.71    | 302.49    | 650.41    | 0.84 | 0.28  | 0.46  | 0.72   | 1.25   |
| 0.44 | 71.45    | 140.80    | 265.52    | 586.00    | 0.85 | 0.23  | 0.37  | 0.57   | 1.00   |
| 0.45 | 63.57    | 124.46    | 231.37    | 510.16    | 0.86 | 0.19  | 0.30  | 0.46   | 0.78   |
| 0.46 | 55.80    | 109.88    | 202.74    | 437.21    | 0.87 | 0.15  | 0.24  | 0.36   | 0.60   |
| 0.47 | 49.85    | 96.22     | 178.93    | 387.83    | 0.88 | 0.12  | 0.19  | 0.28   | 0.46   |
| 0.48 | 43.99    | 85.38     | 157.80    | 334.88    | 0.89 | 0.09  | 0.15  | 0.22   | 0.34   |
| 0.49 | 38.89    | 75.29     | 139.78    | 298.76    | 0.90 | 0.07  | 0.11  | 0.16   | 0.25   |
| 0.50 | 34.13    | 65.69     | 123.25    | 259.21    |      |       |       |        |        |

Table S253: Critical values for detector  $\hat{H}_{mov}^{m,0.1}$  with windows size  $n = 0.1$ , and IM-OLS estimation in a model with intercept and linear trend. The number of integrated regressors is 3 and the highest power of  $x_{kt}$  is 2.

| m    | 90 %     | 95 %     | 97,5 %    | 99 %      | m    | 90 %  | 95 %  | 97,5 % | 99 %   |
|------|----------|----------|-----------|-----------|------|-------|-------|--------|--------|
| 0.10 | 28239.31 | 56353.51 | 109694.29 | 242148.20 | 0.51 | 19.44 | 34.85 | 60.15  | 120.10 |
| 0.11 | 19816.03 | 39645.47 | 75279.65  | 165695.02 | 0.52 | 17.02 | 30.65 | 52.53  | 106.13 |
| 0.12 | 14339.13 | 28547.42 | 53658.26  | 120698.55 | 0.53 | 15.06 | 27.22 | 45.95  | 91.15  |
| 0.13 | 10540.94 | 20792.42 | 38867.41  | 85674.18  | 0.54 | 13.39 | 23.93 | 40.17  | 80.60  |
| 0.14 | 7971.68  | 15803.90 | 28754.37  | 62169.89  | 0.55 | 11.73 | 20.98 | 35.09  | 68.89  |
| 0.15 | 6126.54  | 12036.67 | 22261.26  | 48081.81  | 0.56 | 10.33 | 18.41 | 31.10  | 59.07  |
| 0.16 | 4757.46  | 9356.81  | 17284.15  | 37210.28  | 0.57 | 9.07  | 16.19 | 26.94  | 52.20  |
| 0.17 | 3776.64  | 7386.27  | 13427.78  | 28844.51  | 0.58 | 8.00  | 14.26 | 23.86  | 44.93  |
| 0.18 | 2990.83  | 5751.31  | 10666.85  | 23064.06  | 0.59 | 7.02  | 12.43 | 20.62  | 38.80  |
| 0.19 | 2399.55  | 4597.11  | 8561.11   | 17952.45  | 0.60 | 6.15  | 10.86 | 18.29  | 33.95  |
| 0.20 | 1934.86  | 3747.87  | 6965.58   | 14720.47  | 0.61 | 5.46  | 9.55  | 16.12  | 30.19  |
| 0.21 | 1579.79  | 3025.28  | 5547.27   | 12024.48  | 0.62 | 4.78  | 8.34  | 13.93  | 26.49  |
| 0.22 | 1285.98  | 2475.71  | 4570.97   | 9944.82   | 0.63 | 4.19  | 7.28  | 12.12  | 22.77  |
| 0.23 | 1086.94  | 2085.94  | 3803.65   | 7942.27   | 0.64 | 3.64  | 6.35  | 10.57  | 19.96  |
| 0.24 | 903.58   | 1721.19  | 3157.49   | 6670.32   | 0.65 | 3.14  | 5.48  | 9.20   | 17.28  |
| 0.25 | 755.61   | 1456.92  | 2653.22   | 5618.53   | 0.66 | 2.73  | 4.68  | 7.88   | 14.80  |
| 0.26 | 638.46   | 1218.51  | 2215.08   | 4673.62   | 0.67 | 2.38  | 4.11  | 6.73   | 12.77  |
| 0.27 | 539.06   | 1025.40  | 1829.58   | 3977.63   | 0.68 | 2.08  | 3.53  | 5.73   | 10.83  |
| 0.28 | 459.38   | 866.53   | 1572.97   | 3363.57   | 0.69 | 1.78  | 3.03  | 5.02   | 9.52   |
| 0.29 | 388.47   | 732.54   | 1333.51   | 2883.56   | 0.70 | 1.53  | 2.62  | 4.22   | 7.88   |
| 0.30 | 329.87   | 627.69   | 1133.20   | 2442.73   | 0.71 | 1.34  | 2.24  | 3.58   | 6.48   |
| 0.31 | 282.15   | 530.36   | 961.57    | 2044.22   | 0.72 | 1.14  | 1.91  | 3.04   | 5.55   |
| 0.32 | 243.78   | 457.57   | 823.75    | 1720.96   | 0.73 | 0.98  | 1.63  | 2.55   | 4.65   |
| 0.33 | 210.11   | 394.79   | 710.58    | 1468.72   | 0.74 | 0.84  | 1.36  | 2.13   | 3.72   |
| 0.34 | 181.20   | 341.21   | 615.20    | 1274.22   | 0.75 | 0.71  | 1.16  | 1.79   | 3.20   |
| 0.35 | 156.59   | 295.88   | 530.46    | 1095.03   | 0.76 | 0.61  | 0.99  | 1.55   | 2.65   |
| 0.36 | 135.48   | 257.74   | 457.89    | 941.13    | 0.77 | 0.51  | 0.83  | 1.26   | 2.14   |
| 0.37 | 119.84   | 220.73   | 391.97    | 810.79    | 0.78 | 0.43  | 0.69  | 1.06   | 1.83   |
| 0.38 | 104.43   | 193.88   | 338.95    | 705.74    | 0.79 | 0.35  | 0.56  | 0.87   | 1.45   |
| 0.39 | 90.77    | 167.16   | 301.39    | 609.92    | 0.80 | 0.30  | 0.47  | 0.71   | 1.17   |
| 0.40 | 79.41    | 147.63   | 261.52    | 535.38    | 0.81 | 0.24  | 0.39  | 0.57   | 0.95   |
| 0.41 | 69.34    | 127.74   | 227.86    | 472.24    | 0.82 | 0.20  | 0.31  | 0.47   | 0.77   |
| 0.42 | 61.08    | 111.71   | 203.56    | 403.88    | 0.83 | 0.17  | 0.26  | 0.37   | 0.60   |
| 0.43 | 53.45    | 96.74    | 173.50    | 359.23    | 0.84 | 0.14  | 0.21  | 0.31   | 0.49   |
| 0.44 | 47.04    | 86.08    | 150.94    | 306.31    | 0.85 | 0.11  | 0.17  | 0.24   | 0.38   |
| 0.45 | 41.37    | 75.36    | 132.30    | 270.04    | 0.86 | 0.09  | 0.13  | 0.19   | 0.29   |
| 0.46 | 36.39    | 65.74    | 115.29    | 232.16    | 0.87 | 0.07  | 0.10  | 0.15   | 0.22   |
| 0.47 | 32.26    | 57.76    | 101.53    | 204.13    | 0.88 | 0.06  | 0.08  | 0.11   | 0.17   |
| 0.48 | 28.34    | 51.79    | 90.27     | 178.60    | 0.89 | 0.05  | 0.06  | 0.09   | 0.12   |
| 0.49 | 24.74    | 45.16    | 80.17     | 160.67    | 0.90 | 0.04  | 0.05  | 0.07   | 0.09   |
| 0.50 | 21.99    | 39.86    | 69.44     | 137.22    |      |       |       |        |        |

Table S254: Critical values for detector  $\hat{H}_{mov}^{m,0.2}$  with windows size  $n = 0.2$ , and FM-OLS and D-OLS estimation in a model with intercept and linear trend. The number of integrated regressors is 3 and the highest power of  $x_{kt}$  is 2.

| m    | 90 %     | 95 %      | 97,5 %    | 99 %      | m    | 90 %  | 95 %  | 97,5 % | 99 %   |
|------|----------|-----------|-----------|-----------|------|-------|-------|--------|--------|
| 0.10 | 64346.11 | 136050.07 | 274195.46 | 638673.61 | 0.51 | 42.24 | 80.78 | 149.43 | 317.86 |
| 0.11 | 44913.99 | 94812.51  | 188761.24 | 432421.71 | 0.52 | 37.08 | 71.51 | 129.88 | 277.33 |
| 0.12 | 32666.39 | 68175.91  | 135377.32 | 318295.45 | 0.53 | 32.76 | 63.37 | 114.37 | 247.05 |
| 0.13 | 24374.83 | 50462.33  | 100133.33 | 222476.49 | 0.54 | 29.02 | 55.78 | 101.52 | 216.69 |
| 0.14 | 18086.72 | 37989.00  | 75987.96  | 176498.50 | 0.55 | 25.68 | 49.17 | 88.90  | 189.94 |
| 0.15 | 13911.14 | 29108.55  | 57056.02  | 132001.51 | 0.56 | 22.57 | 43.63 | 78.74  | 165.32 |
| 0.16 | 10581.66 | 22485.05  | 44441.63  | 103719.02 | 0.57 | 19.89 | 37.87 | 68.05  | 141.47 |
| 0.17 | 8377.62  | 17559.59  | 34947.13  | 78925.81  | 0.58 | 17.41 | 33.03 | 59.10  | 125.62 |
| 0.18 | 6656.55  | 13813.49  | 27401.32  | 62599.45  | 0.59 | 15.20 | 28.86 | 52.12  | 110.37 |
| 0.19 | 5310.42  | 11056.37  | 22174.47  | 51034.49  | 0.60 | 13.36 | 25.11 | 44.99  | 95.07  |
| 0.20 | 4298.25  | 8827.33   | 17747.07  | 40890.38  | 0.61 | 11.67 | 22.11 | 39.01  | 81.76  |
| 0.21 | 3458.50  | 7181.32   | 14130.78  | 31681.59  | 0.62 | 10.33 | 19.36 | 34.48  | 70.45  |
| 0.22 | 2862.75  | 5929.50   | 11708.58  | 26403.04  | 0.63 | 9.00  | 17.01 | 29.98  | 60.34  |
| 0.23 | 2356.77  | 4849.70   | 9554.02   | 21544.43  | 0.64 | 7.91  | 14.70 | 25.79  | 52.35  |
| 0.24 | 1977.81  | 4057.17   | 7849.41   | 17566.71  | 0.65 | 6.89  | 12.78 | 22.17  | 44.89  |
| 0.25 | 1656.18  | 3398.67   | 6555.13   | 14697.56  | 0.66 | 5.98  | 11.02 | 19.09  | 38.87  |
| 0.26 | 1413.99  | 2860.97   | 5585.11   | 12628.01  | 0.67 | 5.17  | 9.52  | 16.37  | 33.00  |
| 0.27 | 1189.99  | 2436.83   | 4766.67   | 10749.21  | 0.68 | 4.46  | 8.23  | 13.92  | 27.62  |
| 0.28 | 1013.44  | 2041.49   | 3876.00   | 8990.50   | 0.69 | 3.87  | 7.02  | 12.11  | 24.06  |
| 0.29 | 865.15   | 1738.88   | 3291.97   | 7630.48   | 0.70 | 3.34  | 6.03  | 10.39  | 20.71  |
| 0.30 | 737.32   | 1464.15   | 2859.75   | 6553.28   | 0.71 | 2.87  | 5.14  | 8.93   | 17.21  |
| 0.31 | 632.10   | 1276.81   | 2472.95   | 5531.32   | 0.72 | 2.47  | 4.38  | 7.46   | 14.39  |
| 0.32 | 540.46   | 1101.29   | 2117.84   | 4683.61   | 0.73 | 2.12  | 3.73  | 6.32   | 11.98  |
| 0.33 | 463.21   | 939.46    | 1797.37   | 3963.80   | 0.74 | 1.80  | 3.18  | 5.28   | 9.82   |
| 0.34 | 401.96   | 802.60    | 1554.56   | 3482.91   | 0.75 | 1.53  | 2.67  | 4.39   | 8.35   |
| 0.35 | 347.83   | 691.81    | 1318.82   | 2904.82   | 0.76 | 1.31  | 2.26  | 3.67   | 6.83   |
| 0.36 | 300.97   | 598.60    | 1138.11   | 2487.13   | 0.77 | 1.11  | 1.92  | 3.09   | 5.58   |
| 0.37 | 261.95   | 520.12    | 992.55    | 2210.16   | 0.78 | 0.94  | 1.60  | 2.58   | 4.61   |
| 0.38 | 228.40   | 456.87    | 860.89    | 1889.17   | 0.79 | 0.79  | 1.32  | 2.12   | 3.82   |
| 0.39 | 200.91   | 392.69    | 742.20    | 1619.10   | 0.80 | 0.65  | 1.10  | 1.73   | 3.11   |
| 0.40 | 175.76   | 340.49    | 638.93    | 1406.64   | 0.81 | 0.54  | 0.90  | 1.41   | 2.55   |
| 0.41 | 154.80   | 299.90    | 553.93    | 1224.03   | 0.82 | 0.45  | 0.73  | 1.16   | 2.07   |
| 0.42 | 134.40   | 263.83    | 485.08    | 1061.72   | 0.83 | 0.36  | 0.60  | 0.94   | 1.64   |
| 0.43 | 116.87   | 227.36    | 429.34    | 926.37    | 0.84 | 0.30  | 0.49  | 0.75   | 1.32   |
| 0.44 | 102.41   | 202.06    | 376.16    | 831.61    | 0.85 | 0.24  | 0.39  | 0.59   | 1.04   |
| 0.45 | 90.52    | 177.16    | 328.22    | 719.34    | 0.86 | 0.20  | 0.31  | 0.47   | 0.80   |
| 0.46 | 79.72    | 156.60    | 287.89    | 616.68    | 0.87 | 0.16  | 0.24  | 0.37   | 0.61   |
| 0.47 | 70.89    | 136.19    | 251.48    | 547.87    | 0.88 | 0.12  | 0.19  | 0.29   | 0.46   |
| 0.48 | 62.56    | 119.92    | 222.24    | 470.40    | 0.89 | 0.10  | 0.15  | 0.22   | 0.34   |
| 0.49 | 54.82    | 105.47    | 195.59    | 414.07    | 0.90 | 0.08  | 0.11  | 0.16   | 0.26   |
| 0.50 | 48.19    | 92.50     | 171.40    | 363.96    |      |       |       |        |        |

Table S255: Critical values for detector  $\hat{H}_{mov}^{m,0.2}$  with windows size  $n = 0.2$ , and IM-OLS estimation in a model with intercept and linear trend. The number of integrated regressors is 3 and the highest power of  $x_{kt}$  is 2.



| m    | 90 %     | 95 %     | 97,5 %    | 99 %      | m    | 90 %  | 95 %  | 97,5 % | 99 %   |
|------|----------|----------|-----------|-----------|------|-------|-------|--------|--------|
| 0.10 | 31205.63 | 62126.28 | 120065.28 | 265884.45 | 0.51 | 21.32 | 37.99 | 65.38  | 129.62 |
| 0.11 | 21861.42 | 43721.47 | 82984.73  | 182105.73 | 0.52 | 18.58 | 33.34 | 56.90  | 114.79 |
| 0.12 | 16020.60 | 31690.72 | 58987.60  | 133670.83 | 0.53 | 16.42 | 29.39 | 49.67  | 97.64  |
| 0.13 | 11782.23 | 23088.47 | 42919.56  | 95516.36  | 0.54 | 14.51 | 25.83 | 43.17  | 86.18  |
| 0.14 | 8902.83  | 17592.81 | 31933.43  | 69134.29  | 0.55 | 12.70 | 22.60 | 37.65  | 73.36  |
| 0.15 | 6868.56  | 13434.45 | 24658.02  | 53321.75  | 0.56 | 11.15 | 19.69 | 33.16  | 62.96  |
| 0.16 | 5358.42  | 10466.23 | 19376.79  | 41452.22  | 0.57 | 9.77  | 17.29 | 28.79  | 55.07  |
| 0.17 | 4264.11  | 8257.83  | 14995.38  | 31979.33  | 0.58 | 8.57  | 15.18 | 25.30  | 47.37  |
| 0.18 | 3387.22  | 6440.95  | 11977.02  | 25765.68  | 0.59 | 7.47  | 13.18 | 21.77  | 40.64  |
| 0.19 | 2710.42  | 5195.16  | 9567.15   | 20083.58  | 0.60 | 6.54  | 11.52 | 19.25  | 35.52  |
| 0.20 | 2185.74  | 4259.14  | 7814.82   | 16669.10  | 0.61 | 5.76  | 10.10 | 16.93  | 31.33  |
| 0.21 | 1792.99  | 3411.39  | 6229.93   | 13639.03  | 0.62 | 5.03  | 8.78  | 14.59  | 27.55  |
| 0.22 | 1463.09  | 2795.41  | 5139.92   | 11238.08  | 0.63 | 4.39  | 7.61  | 12.60  | 23.57  |
| 0.23 | 1232.78  | 2356.24  | 4317.86   | 8979.94   | 0.64 | 3.81  | 6.60  | 10.94  | 20.54  |
| 0.24 | 1027.50  | 1953.93  | 3552.31   | 7499.48   | 0.65 | 3.28  | 5.69  | 9.50   | 17.83  |
| 0.25 | 858.31   | 1650.79  | 2997.91   | 6341.61   | 0.66 | 2.83  | 4.82  | 8.12   | 15.13  |
| 0.26 | 721.70   | 1374.55  | 2508.15   | 5282.26   | 0.67 | 2.46  | 4.23  | 6.92   | 13.02  |
| 0.27 | 610.43   | 1161.31  | 2074.63   | 4454.19   | 0.68 | 2.13  | 3.62  | 5.84   | 11.08  |
| 0.28 | 522.85   | 987.37   | 1775.93   | 3774.55   | 0.69 | 1.82  | 3.11  | 5.10   | 9.66   |
| 0.29 | 440.97   | 831.10   | 1502.41   | 3237.02   | 0.70 | 1.56  | 2.67  | 4.28   | 7.98   |
| 0.30 | 375.05   | 712.04   | 1276.76   | 2720.56   | 0.71 | 1.36  | 2.28  | 3.63   | 6.55   |
| 0.31 | 320.12   | 602.44   | 1086.24   | 2288.71   | 0.72 | 1.16  | 1.93  | 3.07   | 5.59   |
| 0.32 | 276.59   | 517.53   | 931.48    | 1929.58   | 0.73 | 0.99  | 1.64  | 2.57   | 4.66   |
| 0.33 | 237.43   | 445.40   | 803.82    | 1656.47   | 0.74 | 0.85  | 1.37  | 2.14   | 3.73   |
| 0.34 | 204.65   | 385.64   | 690.00    | 1423.28   | 0.75 | 0.72  | 1.17  | 1.80   | 3.20   |
| 0.35 | 177.41   | 331.88   | 593.61    | 1233.29   | 0.76 | 0.61  | 0.99  | 1.56   | 2.65   |
| 0.36 | 153.17   | 290.06   | 512.82    | 1053.11   | 0.77 | 0.51  | 0.83  | 1.27   | 2.14   |
| 0.37 | 134.86   | 248.48   | 441.79    | 904.10    | 0.78 | 0.43  | 0.69  | 1.07   | 1.83   |
| 0.38 | 117.53   | 217.21   | 378.29    | 788.53    | 0.79 | 0.35  | 0.57  | 0.87   | 1.45   |
| 0.39 | 101.87   | 187.54   | 337.16    | 679.61    | 0.80 | 0.30  | 0.47  | 0.71   | 1.17   |
| 0.40 | 89.06    | 164.92   | 291.96    | 592.13    | 0.81 | 0.25  | 0.39  | 0.57   | 0.96   |
| 0.41 | 77.70    | 142.55   | 253.14    | 521.50    | 0.82 | 0.20  | 0.32  | 0.47   | 0.77   |
| 0.42 | 68.05    | 124.44   | 225.19    | 446.13    | 0.83 | 0.17  | 0.26  | 0.38   | 0.60   |
| 0.43 | 59.66    | 107.93   | 192.24    | 393.34    | 0.84 | 0.14  | 0.21  | 0.31   | 0.49   |
| 0.44 | 52.51    | 95.47    | 166.70    | 339.18    | 0.85 | 0.11  | 0.17  | 0.24   | 0.38   |
| 0.45 | 46.00    | 83.02    | 145.88    | 293.74    | 0.86 | 0.09  | 0.14  | 0.19   | 0.29   |
| 0.46 | 40.40    | 73.22    | 127.29    | 252.56    | 0.87 | 0.08  | 0.11  | 0.15   | 0.22   |
| 0.47 | 35.67    | 63.58    | 112.00    | 222.68    | 0.88 | 0.06  | 0.09  | 0.12   | 0.17   |
| 0.48 | 31.30    | 56.77    | 98.97     | 196.23    | 0.89 | 0.05  | 0.07  | 0.09   | 0.13   |
| 0.49 | 27.29    | 49.55    | 87.26     | 174.40    | 0.90 | 0.04  | 0.06  | 0.07   | 0.10   |
| 0.50 | 24.12    | 43.42    | 75.73     | 149.44    |      |       |       |        |        |

Table S256: Critical values for detector  $\hat{H}_{mov}^{m,0.3}$  with windows size  $n = 0.3$ , and FM-OLS and D-OLS estimation in a model with intercept and linear trend. The number of integrated regressors is 3 and the highest power of  $x_{kt}$  is 2.

| m    | 90 %     | 95 %      | 97,5 %    | 99 %      | m    | 90 %  | 95 %  | 97,5 % | 99 %   |
|------|----------|-----------|-----------|-----------|------|-------|-------|--------|--------|
| 0.10 | 70807.74 | 148530.98 | 302071.44 | 701183.04 | 0.51 | 46.04 | 88.30 | 162.26 | 342.24 |
| 0.11 | 49491.00 | 104500.91 | 206856.10 | 476801.34 | 0.52 | 40.39 | 77.71 | 140.30 | 295.85 |
| 0.12 | 36144.88 | 75170.18  | 150078.12 | 352080.10 | 0.53 | 35.60 | 68.55 | 124.01 | 263.64 |
| 0.13 | 27055.23 | 55790.66  | 110219.63 | 245761.27 | 0.54 | 31.50 | 60.20 | 109.27 | 229.54 |
| 0.14 | 20088.11 | 42422.64  | 84058.88  | 196208.72 | 0.55 | 27.83 | 53.06 | 95.27  | 202.44 |
| 0.15 | 15524.57 | 32358.43  | 63204.79  | 148165.14 | 0.56 | 24.32 | 46.72 | 83.89  | 175.43 |
| 0.16 | 11868.13 | 25141.32  | 49378.23  | 114622.40 | 0.57 | 21.36 | 40.37 | 72.48  | 150.18 |
| 0.17 | 9396.47  | 19633.75  | 38935.57  | 87650.74  | 0.58 | 18.66 | 35.23 | 62.84  | 132.05 |
| 0.18 | 7477.74  | 15485.25  | 30666.68  | 70349.46  | 0.59 | 16.24 | 30.59 | 55.15  | 115.74 |
| 0.19 | 5975.42  | 12408.62  | 24828.30  | 57543.96  | 0.60 | 14.22 | 26.58 | 47.50  | 98.53  |
| 0.20 | 4839.03  | 9951.22   | 19721.09  | 45657.83  | 0.61 | 12.37 | 23.28 | 40.96  | 85.56  |
| 0.21 | 3902.57  | 8059.34   | 15902.08  | 35815.27  | 0.62 | 10.87 | 20.31 | 35.97  | 73.32  |
| 0.22 | 3222.19  | 6666.74   | 13050.41  | 29468.36  | 0.63 | 9.44  | 17.82 | 31.27  | 62.76  |
| 0.23 | 2673.05  | 5481.96   | 10717.29  | 24142.10  | 0.64 | 8.28  | 15.35 | 26.77  | 53.93  |
| 0.24 | 2242.58  | 4569.21   | 8809.65   | 19728.89  | 0.65 | 7.17  | 13.27 | 22.95  | 45.99  |
| 0.25 | 1883.51  | 3830.20   | 7358.26   | 16573.82  | 0.66 | 6.21  | 11.39 | 19.69  | 39.76  |
| 0.26 | 1598.50  | 3228.24   | 6315.42   | 14164.98  | 0.67 | 5.35  | 9.82  | 16.74  | 33.80  |
| 0.27 | 1351.71  | 2741.19   | 5370.92   | 12093.89  | 0.68 | 4.60  | 8.45  | 14.25  | 28.05  |
| 0.28 | 1145.82  | 2311.64   | 4360.45   | 10056.61  | 0.69 | 3.98  | 7.19  | 12.34  | 24.45  |
| 0.29 | 980.63   | 1961.54   | 3698.75   | 8630.65   | 0.70 | 3.41  | 6.14  | 10.57  | 20.92  |
| 0.30 | 835.00   | 1654.62   | 3220.32   | 7346.19   | 0.71 | 2.92  | 5.23  | 9.04   | 17.39  |
| 0.31 | 716.39   | 1437.62   | 2776.18   | 6205.65   | 0.72 | 2.52  | 4.43  | 7.54   | 14.49  |
| 0.32 | 611.74   | 1236.85   | 2381.70   | 5261.44   | 0.73 | 2.14  | 3.76  | 6.38   | 12.04  |
| 0.33 | 523.29   | 1056.97   | 2024.38   | 4423.33   | 0.74 | 1.82  | 3.20  | 5.32   | 9.88   |
| 0.34 | 454.45   | 902.97    | 1741.67   | 3877.53   | 0.75 | 1.54  | 2.69  | 4.40   | 8.38   |
| 0.35 | 393.55   | 781.33    | 1475.24   | 3277.44   | 0.76 | 1.32  | 2.27  | 3.68   | 6.85   |
| 0.36 | 339.54   | 674.50    | 1270.55   | 2757.84   | 0.77 | 1.12  | 1.93  | 3.09   | 5.59   |
| 0.37 | 295.63   | 583.69    | 1108.76   | 2467.22   | 0.78 | 0.94  | 1.60  | 2.58   | 4.61   |
| 0.38 | 256.92   | 509.56    | 959.24    | 2094.03   | 0.79 | 0.79  | 1.33  | 2.12   | 3.83   |
| 0.39 | 225.12   | 439.16    | 823.73    | 1805.62   | 0.80 | 0.66  | 1.10  | 1.73   | 3.11   |
| 0.40 | 197.68   | 380.52    | 709.47    | 1554.74   | 0.81 | 0.54  | 0.90  | 1.41   | 2.55   |
| 0.41 | 173.38   | 334.10    | 616.02    | 1358.52   | 0.82 | 0.45  | 0.73  | 1.16   | 2.07   |
| 0.42 | 150.32   | 294.06    | 534.38    | 1167.19   | 0.83 | 0.37  | 0.60  | 0.95   | 1.64   |
| 0.43 | 130.22   | 253.42    | 473.06    | 1022.84   | 0.84 | 0.30  | 0.49  | 0.76   | 1.32   |
| 0.44 | 113.75   | 223.46    | 414.55    | 905.03    | 0.85 | 0.24  | 0.39  | 0.60   | 1.04   |
| 0.45 | 100.47   | 196.32    | 360.36    | 788.48    | 0.86 | 0.20  | 0.31  | 0.47   | 0.80   |
| 0.46 | 88.32    | 173.11    | 317.85    | 675.23    | 0.87 | 0.16  | 0.25  | 0.37   | 0.61   |
| 0.47 | 78.22    | 150.65    | 276.90    | 597.86    | 0.88 | 0.12  | 0.20  | 0.29   | 0.46   |
| 0.48 | 69.36    | 131.64    | 243.12    | 515.36    | 0.89 | 0.10  | 0.15  | 0.22   | 0.35   |
| 0.49 | 60.22    | 115.59    | 214.71    | 450.94    | 0.90 | 0.08  | 0.12  | 0.17   | 0.26   |
| 0.50 | 52.98    | 100.80    | 185.84    | 392.40    |      |       |       |        |        |

Table S257: Critical values for detector  $\hat{H}_{mov}^{m,0.3}$  with windows size  $n = 0.3$ , and IM-OLS estimation in a model with intercept and linear trend. The number of integrated regressors is 3 and the highest power of  $x_{kt}$  is 2.

| m    | 90 %      | 95 %       | 97,5 %     | 99 %        | m    | 90 %  | 95 %   | 97,5 % | 99 %    |
|------|-----------|------------|------------|-------------|------|-------|--------|--------|---------|
| 0.10 | 812601.82 | 3019884.05 | 8810974.56 | 28539867.88 | 0.51 | 71.78 | 259.09 | 716.13 | 2230.84 |
| 0.11 | 528197.70 | 1909205.41 | 5609108.80 | 19106315.32 | 0.52 | 60.25 | 217.07 | 602.84 | 1900.91 |
| 0.12 | 358537.92 | 1259112.93 | 3728949.16 | 12357400.39 | 0.53 | 50.06 | 181.34 | 504.15 | 1569.67 |
| 0.13 | 243039.26 | 874643.08  | 2617040.82 | 8337572.88  | 0.54 | 42.87 | 153.09 | 412.98 | 1338.80 |
| 0.14 | 167114.89 | 596279.90  | 1780503.72 | 6086232.93  | 0.55 | 36.29 | 127.25 | 361.44 | 1119.55 |
| 0.15 | 120628.77 | 434453.05  | 1308383.56 | 4438247.15  | 0.56 | 30.52 | 106.38 | 295.50 | 924.71  |
| 0.16 | 87257.31  | 319264.30  | 934539.51  | 3137804.11  | 0.57 | 26.60 | 90.09  | 248.41 | 777.46  |
| 0.17 | 64768.51  | 241275.96  | 661548.07  | 2295777.13  | 0.58 | 22.53 | 75.67  | 214.25 | 686.12  |
| 0.18 | 48530.60  | 177900.00  | 516596.10  | 1691009.27  | 0.59 | 18.99 | 64.16  | 181.03 | 556.83  |
| 0.19 | 36518.76  | 134798.31  | 388239.39  | 1285740.63  | 0.60 | 15.96 | 54.33  | 153.28 | 476.67  |
| 0.20 | 28119.84  | 102703.52  | 293468.92  | 980403.38   | 0.61 | 13.39 | 46.45  | 129.63 | 409.95  |
| 0.21 | 21877.32  | 79933.98   | 227029.67  | 766676.59   | 0.62 | 11.44 | 38.92  | 107.88 | 337.18  |
| 0.22 | 16667.00  | 63192.03   | 176544.28  | 598130.90   | 0.63 | 9.69  | 32.05  | 87.56  | 280.52  |
| 0.23 | 13117.93  | 49082.23   | 144850.97  | 467523.11   | 0.64 | 8.13  | 26.93  | 72.54  | 225.85  |
| 0.24 | 10521.47  | 38525.31   | 114157.85  | 371718.72   | 0.65 | 6.82  | 22.44  | 60.38  | 187.74  |
| 0.25 | 8421.72   | 31076.22   | 91426.35   | 297731.78   | 0.66 | 5.63  | 18.30  | 49.28  | 149.85  |
| 0.26 | 6743.73   | 24903.25   | 72713.43   | 232704.82   | 0.67 | 4.75  | 15.35  | 40.82  | 124.37  |
| 0.27 | 5315.48   | 19828.15   | 58145.99   | 185673.11   | 0.68 | 4.01  | 12.48  | 33.53  | 101.95  |
| 0.28 | 4392.31   | 16439.95   | 46376.74   | 149924.60   | 0.69 | 3.30  | 10.49  | 27.85  | 78.31   |
| 0.29 | 3565.57   | 13206.40   | 37660.62   | 118192.28   | 0.70 | 2.78  | 8.74   | 22.56  | 66.47   |
| 0.30 | 2887.69   | 10693.88   | 31449.40   | 95965.38    | 0.71 | 2.31  | 6.99   | 18.06  | 54.59   |
| 0.31 | 2389.21   | 8593.06    | 25480.57   | 81254.11    | 0.72 | 1.93  | 5.82   | 14.78  | 43.58   |
| 0.32 | 1975.85   | 7051.60    | 21058.43   | 67860.87    | 0.73 | 1.61  | 4.82   | 12.32  | 36.87   |
| 0.33 | 1618.68   | 5874.27    | 17445.65   | 54849.75    | 0.74 | 1.32  | 3.89   | 9.89   | 29.34   |
| 0.34 | 1323.99   | 4805.17    | 14426.95   | 43927.25    | 0.75 | 1.09  | 3.12   | 7.98   | 23.43   |
| 0.35 | 1115.45   | 4045.24    | 11641.79   | 37339.52    | 0.76 | 0.90  | 2.55   | 6.38   | 18.30   |
| 0.36 | 934.44    | 3388.32    | 9938.00    | 31076.63    | 0.77 | 0.73  | 2.06   | 5.13   | 14.74   |
| 0.37 | 780.64    | 2850.41    | 8191.75    | 25413.66    | 0.78 | 0.61  | 1.68   | 4.09   | 11.06   |
| 0.38 | 642.31    | 2323.87    | 6848.45    | 21868.79    | 0.79 | 0.49  | 1.31   | 3.13   | 8.75    |
| 0.39 | 553.40    | 1952.24    | 5620.54    | 18173.50    | 0.80 | 0.40  | 1.05   | 2.49   | 6.66    |
| 0.40 | 464.69    | 1639.85    | 4667.26    | 15259.83    | 0.81 | 0.32  | 0.83   | 1.93   | 5.22    |
| 0.41 | 392.00    | 1390.82    | 3834.35    | 12663.92    | 0.82 | 0.26  | 0.64   | 1.52   | 3.98    |
| 0.42 | 326.64    | 1158.66    | 3253.83    | 10377.95    | 0.83 | 0.20  | 0.49   | 1.16   | 2.90    |
| 0.43 | 274.43    | 991.73     | 2744.04    | 8676.77     | 0.84 | 0.16  | 0.37   | 0.86   | 2.15    |
| 0.44 | 230.94    | 838.89     | 2309.74    | 7372.00     | 0.85 | 0.13  | 0.28   | 0.64   | 1.60    |
| 0.45 | 193.99    | 690.73     | 1957.95    | 6089.60     | 0.86 | 0.10  | 0.21   | 0.44   | 1.16    |
| 0.46 | 164.44    | 584.64     | 1628.99    | 4977.95     | 0.87 | 0.08  | 0.16   | 0.32   | 0.80    |
| 0.47 | 139.78    | 496.16     | 1361.12    | 4251.20     | 0.88 | 0.06  | 0.11   | 0.23   | 0.55    |
| 0.48 | 119.33    | 425.66     | 1180.14    | 3613.98     | 0.89 | 0.05  | 0.08   | 0.16   | 0.37    |
| 0.49 | 100.87    | 364.48     | 1020.37    | 3164.66     | 0.90 | 0.03  | 0.06   | 0.11   | 0.24    |
| 0.50 | 84.94     | 308.15     | 887.02     | 2660.65     |      |       |        |        |         |

Table S258: Critical values for detector  $\hat{H}_{mov}^{m,0.1}$  with windows size  $n = 0.1$ , and FM-OLS and D-OLS estimation in a model with intercept. The number of integrated regressors is 3 and the highest power of  $x_{kt}$  is 3.

| m    | 90 %       | 95 %        | 97,5 %      | 99 %         | m    | 90 %   | 95 %   | 97,5 %  | 99 %    |
|------|------------|-------------|-------------|--------------|------|--------|--------|---------|---------|
| 0.10 | 2825531.37 | 10966145.54 | 34654936.74 | 126477382.78 | 0.51 | 246.54 | 912.21 | 2727.81 | 9216.34 |
| 0.11 | 1842945.28 | 7253618.57  | 22280757.83 | 82257941.90  | 0.52 | 205.68 | 774.79 | 2320.52 | 7844.54 |
| 0.12 | 1223321.15 | 4757857.14  | 15097263.58 | 56250964.72  | 0.53 | 172.55 | 658.77 | 1946.10 | 6654.77 |
| 0.13 | 839917.28  | 3264900.16  | 10541870.18 | 37497924.24  | 0.54 | 147.73 | 551.27 | 1674.82 | 5588.03 |
| 0.14 | 578635.90  | 2279554.64  | 7211709.99  | 26377363.48  | 0.55 | 125.90 | 472.77 | 1392.75 | 4744.88 |
| 0.15 | 408338.77  | 1614518.20  | 5188719.71  | 18654194.87  | 0.56 | 107.06 | 405.97 | 1169.19 | 4032.87 |
| 0.16 | 301569.90  | 1146012.91  | 3784280.99  | 13796562.94  | 0.57 | 90.65  | 335.40 | 1003.01 | 3270.37 |
| 0.17 | 224328.17  | 875278.14   | 2689869.15  | 9712097.89   | 0.58 | 76.73  | 279.37 | 834.52  | 2654.24 |
| 0.18 | 166961.44  | 657641.04   | 2052486.33  | 7442149.10   | 0.59 | 65.03  | 239.09 | 720.63  | 2267.89 |
| 0.19 | 127272.46  | 494206.61   | 1519482.23  | 5693003.96   | 0.60 | 54.50  | 203.26 | 588.07  | 1948.81 |
| 0.20 | 95279.08   | 380237.83   | 1164385.62  | 4293651.63   | 0.61 | 45.45  | 172.26 | 504.00  | 1645.92 |
| 0.21 | 75102.78   | 293459.15   | 907888.73   | 3281254.60   | 0.62 | 38.71  | 145.27 | 421.48  | 1409.64 |
| 0.22 | 57563.47   | 221571.50   | 698673.77   | 2545634.87   | 0.63 | 32.43  | 122.20 | 354.00  | 1179.68 |
| 0.23 | 44238.53   | 174300.80   | 552264.10   | 2016541.77   | 0.64 | 26.72  | 98.86  | 298.17  | 954.33  |
| 0.24 | 35689.55   | 141619.25   | 442077.91   | 1558723.17   | 0.65 | 22.59  | 81.89  | 250.34  | 799.42  |
| 0.25 | 28284.18   | 114832.46   | 356190.09   | 1266967.11   | 0.66 | 19.05  | 67.63  | 203.41  | 675.30  |
| 0.26 | 22566.51   | 89448.76    | 276802.92   | 1032300.40   | 0.67 | 15.79  | 57.49  | 167.37  | 551.96  |
| 0.27 | 18209.47   | 70129.22    | 223017.38   | 829272.13    | 0.68 | 13.02  | 47.58  | 134.02  | 480.06  |
| 0.28 | 14545.47   | 57193.34    | 182152.99   | 670097.97    | 0.69 | 10.86  | 39.01  | 112.22  | 386.06  |
| 0.29 | 11899.45   | 47480.79    | 143990.81   | 524480.00    | 0.70 | 8.97   | 31.79  | 90.34   | 296.89  |
| 0.30 | 9748.91    | 37589.05    | 113858.81   | 416049.57    | 0.71 | 7.52   | 26.10  | 74.09   | 238.87  |
| 0.31 | 7906.24    | 30517.36    | 93994.76    | 334528.16    | 0.72 | 6.21   | 21.45  | 60.59   | 191.16  |
| 0.32 | 6598.84    | 25262.48    | 76511.49    | 277027.41    | 0.73 | 5.07   | 17.50  | 48.21   | 156.23  |
| 0.33 | 5497.50    | 21095.18    | 64849.99    | 233245.51    | 0.74 | 4.10   | 14.37  | 38.85   | 128.62  |
| 0.34 | 4593.42    | 17660.27    | 54863.53    | 186769.69    | 0.75 | 3.38   | 11.42  | 31.42   | 100.56  |
| 0.35 | 3863.10    | 14652.42    | 44486.05    | 152768.98    | 0.76 | 2.78   | 9.13   | 25.44   | 77.69   |
| 0.36 | 3196.64    | 12496.46    | 37064.95    | 128715.12    | 0.77 | 2.29   | 7.32   | 20.26   | 63.04   |
| 0.37 | 2660.80    | 10258.01    | 31885.13    | 107163.35    | 0.78 | 1.86   | 5.78   | 16.12   | 49.61   |
| 0.38 | 2222.44    | 8306.33     | 26273.70    | 91988.72     | 0.79 | 1.49   | 4.63   | 12.23   | 38.69   |
| 0.39 | 1866.40    | 7093.87     | 21317.86    | 77185.24     | 0.80 | 1.19   | 3.63   | 9.59    | 29.46   |
| 0.40 | 1598.64    | 6003.17     | 17869.80    | 64064.51     | 0.81 | 0.94   | 2.81   | 7.63    | 22.97   |
| 0.41 | 1330.58    | 5050.25     | 14989.78    | 53682.23     | 0.82 | 0.75   | 2.17   | 5.84    | 16.93   |
| 0.42 | 1123.76    | 4219.76     | 13012.91    | 44560.49     | 0.83 | 0.60   | 1.69   | 4.38    | 12.50   |
| 0.43 | 945.47     | 3536.44     | 10675.61    | 37372.80     | 0.84 | 0.47   | 1.29   | 3.22    | 9.24    |
| 0.44 | 784.81     | 2963.71     | 8950.99     | 30777.95     | 0.85 | 0.37   | 0.96   | 2.42    | 6.84    |
| 0.45 | 655.17     | 2482.98     | 7572.57     | 25414.44     | 0.86 | 0.28   | 0.71   | 1.73    | 4.97    |
| 0.46 | 543.62     | 2103.21     | 6456.91     | 21054.26     | 0.87 | 0.22   | 0.53   | 1.24    | 3.40    |
| 0.47 | 460.64     | 1758.85     | 5389.55     | 17932.97     | 0.88 | 0.17   | 0.38   | 0.88    | 2.40    |
| 0.48 | 398.39     | 1513.85     | 4559.21     | 15092.04     | 0.89 | 0.13   | 0.28   | 0.64    | 1.61    |
| 0.49 | 340.13     | 1270.98     | 3910.51     | 12706.46     | 0.90 | 0.09   | 0.20   | 0.43    | 1.05    |
| 0.50 | 293.29     | 1069.89     | 3237.34     | 10848.51     |      |        |        |         |         |

Table S259: Critical values for detector  $\hat{H}_{mov}^{m,0.1}$  with windows size  $n = 0.1$ , and IM-OLS estimation in a model with intercept. The number of integrated regressors is 3 and the highest power of  $x_{kt}$  is 3.

| m    | 90 %       | 95 %       | 97,5 %      | 99 %        | m    | 90 %  | 95 %   | 97,5 % | 99 %    |
|------|------------|------------|-------------|-------------|------|-------|--------|--------|---------|
| 0.10 | 1204130.55 | 4520820.98 | 13057594.94 | 42788192.49 | 0.51 | 96.75 | 346.47 | 957.11 | 2931.46 |
| 0.11 | 779590.64  | 2835400.29 | 8470922.70  | 28874279.49 | 0.52 | 80.42 | 288.90 | 798.80 | 2462.00 |
| 0.12 | 530350.48  | 1866706.10 | 5620026.11  | 18707903.67 | 0.53 | 66.83 | 239.48 | 666.44 | 2045.45 |
| 0.13 | 358717.30  | 1306220.31 | 3908389.32  | 12545856.44 | 0.54 | 57.09 | 201.38 | 543.58 | 1708.78 |
| 0.14 | 245397.38  | 891683.72  | 2635039.01  | 9024913.40  | 0.55 | 47.99 | 167.79 | 468.22 | 1445.31 |
| 0.15 | 178819.47  | 646024.23  | 1966579.83  | 6625020.59  | 0.56 | 40.31 | 138.11 | 383.79 | 1170.05 |
| 0.16 | 128682.49  | 473235.44  | 1378046.16  | 4709402.31  | 0.57 | 34.96 | 117.35 | 320.64 | 985.62  |
| 0.17 | 95386.21   | 357334.87  | 989175.29   | 3402819.58  | 0.58 | 29.56 | 97.00  | 272.13 | 864.81  |
| 0.18 | 71301.67   | 264950.57  | 762685.70   | 2509472.97  | 0.59 | 24.71 | 81.13  | 227.36 | 699.71  |
| 0.19 | 53960.82   | 200075.94  | 575200.43   | 1943693.56  | 0.60 | 20.48 | 68.41  | 190.24 | 600.83  |
| 0.20 | 41089.06   | 151885.46  | 438371.94   | 1451758.84  | 0.61 | 17.30 | 58.42  | 161.81 | 516.39  |
| 0.21 | 31810.54   | 116902.12  | 332883.38   | 1143803.76  | 0.62 | 14.63 | 48.79  | 133.99 | 419.58  |
| 0.22 | 24278.14   | 92218.48   | 260745.65   | 876341.61   | 0.63 | 12.34 | 40.27  | 107.79 | 337.08  |
| 0.23 | 19203.53   | 71511.64   | 211815.66   | 688932.97   | 0.64 | 10.21 | 33.57  | 88.16  | 275.87  |
| 0.24 | 15275.47   | 56312.71   | 163612.31   | 536646.76   | 0.65 | 8.51  | 27.83  | 72.70  | 222.12  |
| 0.25 | 12150.11   | 45722.75   | 130619.41   | 436982.28   | 0.66 | 7.00  | 22.28  | 59.32  | 179.05  |
| 0.26 | 9873.59    | 36220.53   | 104896.95   | 338068.95   | 0.67 | 5.90  | 18.62  | 48.85  | 146.64  |
| 0.27 | 7715.92    | 28577.05   | 84902.36    | 269564.97   | 0.68 | 4.94  | 14.95  | 39.70  | 118.82  |
| 0.28 | 6331.87    | 23783.11   | 67072.49    | 217116.58   | 0.69 | 4.01  | 12.48  | 33.09  | 91.25   |
| 0.29 | 5156.01    | 18910.82   | 54286.51    | 167619.79   | 0.70 | 3.36  | 10.27  | 26.41  | 74.79   |
| 0.30 | 4174.17    | 15390.81   | 45638.25    | 138125.80   | 0.71 | 2.77  | 8.19   | 20.91  | 61.80   |
| 0.31 | 3428.52    | 12393.56   | 36656.33    | 116143.34   | 0.72 | 2.31  | 6.75   | 16.83  | 48.51   |
| 0.32 | 2827.30    | 10184.93   | 30117.64    | 97540.12    | 0.73 | 1.90  | 5.55   | 14.11  | 40.92   |
| 0.33 | 2328.03    | 8359.83    | 25056.82    | 77712.86    | 0.74 | 1.54  | 4.47   | 11.02  | 32.14   |
| 0.34 | 1879.50    | 6830.27    | 20458.49    | 61452.40    | 0.75 | 1.26  | 3.54   | 8.81   | 25.62   |
| 0.35 | 1584.62    | 5737.96    | 16669.57    | 52290.07    | 0.76 | 1.04  | 2.85   | 7.02   | 20.00   |
| 0.36 | 1326.48    | 4773.15    | 14252.60    | 43689.44    | 0.77 | 0.83  | 2.28   | 5.52   | 15.85   |
| 0.37 | 1100.83    | 3995.24    | 11587.16    | 36540.52    | 0.78 | 0.68  | 1.83   | 4.39   | 11.74   |
| 0.38 | 904.16     | 3296.89    | 9618.51     | 30185.25    | 0.79 | 0.54  | 1.41   | 3.33   | 9.20    |
| 0.39 | 776.40     | 2734.36    | 7840.93     | 25418.60    | 0.80 | 0.44  | 1.12   | 2.64   | 6.98    |
| 0.40 | 652.54     | 2274.93    | 6519.58     | 21172.13    | 0.81 | 0.35  | 0.87   | 2.02   | 5.38    |
| 0.41 | 542.40     | 1940.33    | 5365.35     | 17792.64    | 0.82 | 0.27  | 0.67   | 1.58   | 4.09    |
| 0.42 | 455.63     | 1618.89    | 4489.22     | 14495.87    | 0.83 | 0.22  | 0.51   | 1.19   | 2.98    |
| 0.43 | 381.31     | 1354.84    | 3818.01     | 11925.07    | 0.84 | 0.17  | 0.38   | 0.88   | 2.19    |
| 0.44 | 320.22     | 1140.95    | 3185.55     | 9937.50     | 0.85 | 0.14  | 0.29   | 0.65   | 1.61    |
| 0.45 | 267.70     | 952.31     | 2651.83     | 8401.09     | 0.86 | 0.11  | 0.21   | 0.45   | 1.17    |
| 0.46 | 227.23     | 805.51     | 2185.57     | 6715.55     | 0.87 | 0.08  | 0.16   | 0.32   | 0.80    |
| 0.47 | 191.78     | 676.57     | 1846.26     | 5776.01     | 0.88 | 0.07  | 0.12   | 0.23   | 0.55    |
| 0.48 | 163.25     | 573.28     | 1572.03     | 4857.07     | 0.89 | 0.05  | 0.09   | 0.16   | 0.37    |
| 0.49 | 136.92     | 489.18     | 1366.66     | 4197.33     | 0.90 | 0.04  | 0.07   | 0.11   | 0.24    |
| 0.50 | 115.41     | 408.70     | 1185.41     | 3542.85     |      |       |        |        |         |

Table S260: Critical values for detector  $\hat{H}_{mov}^{m,0.2}$  with windows size  $n = 0.2$ , and FM-OLS and D-OLS estimation in a model with intercept. The number of integrated regressors is 3 and the highest power of  $x_{kt}$  is 3.

| m    | 90 %       | 95 %        | 97,5 %      | 99 %         | m    | 90 %   | 95 %    | 97,5 %  | 99 %     |
|------|------------|-------------|-------------|--------------|------|--------|---------|---------|----------|
| 0.10 | 4184396.76 | 16374446.71 | 51610005.96 | 192193581.55 | 0.51 | 328.37 | 1230.32 | 3614.86 | 12233.44 |
| 0.11 | 2708435.71 | 10813411.53 | 33398517.52 | 124953200.15 | 0.52 | 277.81 | 1015.85 | 3068.65 | 10225.05 |
| 0.12 | 1807492.07 | 7073946.25  | 22454927.37 | 85224588.87  | 0.53 | 231.74 | 871.45  | 2568.18 | 8556.67  |
| 0.13 | 1237976.99 | 4843422.25  | 15565396.63 | 56148133.28  | 0.54 | 196.99 | 728.17  | 2179.73 | 7283.21  |
| 0.14 | 851824.62  | 3384689.76  | 10787670.62 | 40085168.64  | 0.55 | 166.47 | 618.49  | 1815.00 | 6233.45  |
| 0.15 | 600829.23  | 2406260.06  | 7729414.16  | 27829025.37  | 0.56 | 139.57 | 525.23  | 1506.59 | 5076.44  |
| 0.16 | 440652.80  | 1709865.31  | 5613867.18  | 20929145.50  | 0.57 | 118.78 | 434.55  | 1293.09 | 4166.66  |
| 0.17 | 328899.32  | 1293418.08  | 3996494.11  | 14574646.86  | 0.58 | 100.09 | 362.55  | 1068.30 | 3385.85  |
| 0.18 | 245442.42  | 967155.77   | 3070870.01  | 11159810.46  | 0.59 | 84.37  | 307.60  | 913.15  | 2862.42  |
| 0.19 | 184554.49  | 724709.59   | 2269322.54  | 8334365.33   | 0.60 | 70.33  | 258.51  | 744.22  | 2441.66  |
| 0.20 | 140365.02  | 560248.17   | 1725935.06  | 6448290.79   | 0.61 | 58.76  | 216.92  | 623.78  | 2036.85  |
| 0.21 | 109158.93  | 427763.16   | 1338244.50  | 4830445.25   | 0.62 | 49.58  | 183.22  | 525.96  | 1746.48  |
| 0.22 | 82921.77   | 325982.92   | 1015837.75  | 3782408.51   | 0.63 | 41.44  | 151.72  | 434.64  | 1424.79  |
| 0.23 | 64521.10   | 253683.03   | 807902.68   | 2925595.50   | 0.64 | 34.05  | 123.04  | 367.89  | 1174.95  |
| 0.24 | 52181.13   | 205882.83   | 650755.88   | 2308848.08   | 0.65 | 28.36  | 100.88  | 301.78  | 971.33   |
| 0.25 | 40998.54   | 167870.47   | 522700.57   | 1871114.77   | 0.66 | 23.78  | 82.60   | 244.70  | 797.27   |
| 0.26 | 32465.06   | 128732.89   | 400887.96   | 1509487.80   | 0.67 | 19.49  | 69.51   | 201.06  | 647.49   |
| 0.27 | 26259.99   | 101845.14   | 326279.57   | 1189128.20   | 0.68 | 16.04  | 57.13   | 159.68  | 549.61   |
| 0.28 | 20960.21   | 83706.45    | 262543.30   | 965669.17    | 0.69 | 13.21  | 46.48   | 132.37  | 450.39   |
| 0.29 | 17230.55   | 68372.76    | 206838.88   | 768876.87    | 0.70 | 10.83  | 37.61   | 105.15  | 338.92   |
| 0.30 | 14002.76   | 54240.81    | 163626.22   | 599683.22    | 0.71 | 8.96   | 30.64   | 84.90   | 271.28   |
| 0.31 | 11328.88   | 43770.91    | 134124.40   | 480646.73    | 0.72 | 7.33   | 24.99   | 69.48   | 216.69   |
| 0.32 | 9456.46    | 36308.58    | 110720.56   | 396714.89    | 0.73 | 5.95   | 20.09   | 55.07   | 175.50   |
| 0.33 | 7878.95    | 30317.12    | 92886.58    | 341470.52    | 0.74 | 4.81   | 16.43   | 44.02   | 141.69   |
| 0.34 | 6537.36    | 25014.15    | 78362.97    | 268654.20    | 0.75 | 3.93   | 12.90   | 34.97   | 110.74   |
| 0.35 | 5500.38    | 20719.67    | 62831.56    | 214530.30    | 0.76 | 3.21   | 10.29   | 28.07   | 84.02    |
| 0.36 | 4511.08    | 17528.94    | 52489.09    | 180874.33    | 0.77 | 2.60   | 8.11    | 22.25   | 67.60    |
| 0.37 | 3768.45    | 14296.78    | 44986.48    | 148810.85    | 0.78 | 2.08   | 6.36    | 17.38   | 52.92    |
| 0.38 | 3151.30    | 11803.24    | 36761.45    | 128993.67    | 0.79 | 1.65   | 5.04    | 13.17   | 40.85    |
| 0.39 | 2645.34    | 9919.69     | 29775.83    | 107375.35    | 0.80 | 1.31   | 3.91    | 10.14   | 30.75    |
| 0.40 | 2228.60    | 8427.85     | 25065.75    | 89152.64     | 0.81 | 1.03   | 3.00    | 8.02    | 23.74    |
| 0.41 | 1858.97    | 6998.95     | 20967.08    | 74030.91     | 0.82 | 0.81   | 2.28    | 6.06    | 17.44    |
| 0.42 | 1576.41    | 5839.55     | 18144.42    | 62176.63     | 0.83 | 0.64   | 1.76    | 4.55    | 12.82    |
| 0.43 | 1307.21    | 4891.77     | 14597.10    | 51597.79     | 0.84 | 0.49   | 1.33    | 3.30    | 9.43     |
| 0.44 | 1088.86    | 4091.03     | 12321.78    | 42558.06     | 0.85 | 0.38   | 0.98    | 2.47    | 6.95     |
| 0.45 | 895.70     | 3372.20     | 10252.37    | 34721.34     | 0.86 | 0.29   | 0.73    | 1.75    | 5.01     |
| 0.46 | 741.51     | 2866.73     | 8685.21     | 28656.04     | 0.87 | 0.22   | 0.54    | 1.25    | 3.41     |
| 0.47 | 627.27     | 2407.14     | 7335.05     | 24350.35     | 0.88 | 0.17   | 0.39    | 0.89    | 2.41     |
| 0.48 | 538.41     | 2042.54     | 6162.72     | 20212.54     | 0.89 | 0.13   | 0.28    | 0.64    | 1.61     |
| 0.49 | 460.53     | 1725.63     | 5179.60     | 17108.58     | 0.90 | 0.10   | 0.20    | 0.44    | 1.05     |
| 0.50 | 391.72     | 1459.85     | 4294.78     | 14545.84     |      |        |         |         |          |

Table S261: Critical values for detector  $\hat{H}_{mov}^{m,0.2}$  with windows size  $n = 0.2$ , and IM-OLS estimation in a model with intercept. The number of integrated regressors is 3 and the highest power of  $x_{kt}$  is 3.

| m    | 90 %       | 95 %       | 97,5 %      | 99 %        | m    | 90 %   | 95 %   | 97,5 %  | 99 %    |
|------|------------|------------|-------------|-------------|------|--------|--------|---------|---------|
| 0.10 | 1380967.13 | 5206957.43 | 15019038.88 | 49428035.19 | 0.51 | 104.08 | 369.55 | 1019.44 | 3080.56 |
| 0.11 | 896564.85  | 3285730.77 | 9804221.94  | 33861589.22 | 0.52 | 86.40  | 307.57 | 848.07  | 2573.63 |
| 0.12 | 604339.05  | 2137143.08 | 6431391.37  | 21664590.79 | 0.53 | 71.64  | 254.78 | 702.47  | 2159.71 |
| 0.13 | 412016.25  | 1491218.68 | 4450988.68  | 14610278.26 | 0.54 | 60.93  | 213.86 | 570.80  | 1791.16 |
| 0.14 | 281295.54  | 1026715.18 | 3029982.42  | 10383619.44 | 0.55 | 51.17  | 177.02 | 490.88  | 1509.86 |
| 0.15 | 204612.81  | 738566.84  | 2266956.74  | 7648768.45  | 0.56 | 42.74  | 144.36 | 403.52  | 1217.61 |
| 0.16 | 146581.19  | 538224.48  | 1573342.58  | 5346709.16  | 0.57 | 36.97  | 123.21 | 334.18  | 1013.76 |
| 0.17 | 108963.44  | 408828.45  | 1140788.24  | 3912847.00  | 0.58 | 31.25  | 101.64 | 283.00  | 890.75  |
| 0.18 | 80656.79   | 305696.54  | 877965.70   | 2878208.18  | 0.59 | 25.99  | 84.57  | 236.78  | 720.37  |
| 0.19 | 61071.79   | 228405.02  | 658699.82   | 2208052.28  | 0.60 | 21.48  | 70.76  | 196.88  | 616.91  |
| 0.20 | 46901.02   | 172944.25  | 497883.60   | 1655086.44  | 0.61 | 18.12  | 60.62  | 167.75  | 524.68  |
| 0.21 | 35848.81   | 133965.82  | 381133.30   | 1309513.28  | 0.62 | 15.26  | 50.41  | 136.76  | 428.78  |
| 0.22 | 27625.22   | 104230.75  | 296828.81   | 984516.54   | 0.63 | 12.80  | 41.44  | 110.06  | 340.55  |
| 0.23 | 21782.69   | 81270.33   | 240347.53   | 767211.51   | 0.64 | 10.56  | 34.38  | 89.79   | 281.85  |
| 0.24 | 17202.67   | 63650.51   | 184299.13   | 606743.81   | 0.65 | 8.75   | 28.50  | 74.30   | 225.17  |
| 0.25 | 13824.43   | 51301.39   | 148127.74   | 488637.66   | 0.66 | 7.20   | 22.71  | 60.30   | 181.62  |
| 0.26 | 11144.86   | 40662.05   | 119390.19   | 376982.45   | 0.67 | 6.03   | 18.95  | 49.50   | 148.16  |
| 0.27 | 8685.80    | 32191.50   | 94738.01    | 300397.71   | 0.68 | 5.04   | 15.17  | 40.11   | 119.69  |
| 0.28 | 7086.91    | 26649.21   | 75096.38    | 244220.93   | 0.69 | 4.09   | 12.62  | 33.39   | 91.79   |
| 0.29 | 5780.23    | 21282.67   | 61274.97    | 189882.57   | 0.70 | 3.40   | 10.40  | 26.59   | 75.25   |
| 0.30 | 4700.49    | 17199.62   | 50773.89    | 154965.43   | 0.71 | 2.80   | 8.23   | 20.99   | 61.98   |
| 0.31 | 3834.82    | 13812.26   | 40763.93    | 131465.68   | 0.72 | 2.33   | 6.78   | 16.96   | 48.65   |
| 0.32 | 3167.48    | 11292.23   | 33682.04    | 108646.72   | 0.73 | 1.92   | 5.57   | 14.13   | 41.02   |
| 0.33 | 2580.47    | 9241.68    | 27581.76    | 86612.48    | 0.74 | 1.55   | 4.48   | 11.03   | 32.16   |
| 0.34 | 2092.32    | 7571.11    | 22776.20    | 67882.63    | 0.75 | 1.27   | 3.55   | 8.83    | 25.64   |
| 0.35 | 1771.28    | 6328.84    | 18716.21    | 57857.48    | 0.76 | 1.04   | 2.85   | 7.03    | 20.01   |
| 0.36 | 1468.51    | 5255.38    | 15671.62    | 47883.59    | 0.77 | 0.83   | 2.28   | 5.53    | 15.85   |
| 0.37 | 1223.42    | 4392.50    | 12676.28    | 40039.39    | 0.78 | 0.68   | 1.83   | 4.39    | 11.74   |
| 0.38 | 1000.58    | 3642.66    | 10634.30    | 33033.95    | 0.79 | 0.54   | 1.41   | 3.33    | 9.20    |
| 0.39 | 862.13     | 3042.48    | 8606.81     | 27661.68    | 0.80 | 0.44   | 1.12   | 2.65    | 6.98    |
| 0.40 | 719.39     | 2489.28    | 7238.91     | 23214.00    | 0.81 | 0.35   | 0.88   | 2.02    | 5.38    |
| 0.41 | 596.11     | 2140.30    | 5827.80     | 19249.76    | 0.82 | 0.28   | 0.68   | 1.58    | 4.09    |
| 0.42 | 501.10     | 1778.32    | 4911.60     | 15721.18    | 0.83 | 0.22   | 0.51   | 1.20    | 2.99    |
| 0.43 | 419.97     | 1472.84    | 4137.52     | 12868.87    | 0.84 | 0.18   | 0.39   | 0.88    | 2.19    |
| 0.44 | 348.50     | 1245.94    | 3438.12     | 10729.77    | 0.85 | 0.14   | 0.29   | 0.65    | 1.62    |
| 0.45 | 292.73     | 1035.78    | 2867.21     | 9035.59     | 0.86 | 0.12   | 0.22   | 0.45    | 1.18    |
| 0.46 | 246.27     | 872.10     | 2353.79     | 7203.70     | 0.87 | 0.10   | 0.17   | 0.33    | 0.81    |
| 0.47 | 208.37     | 730.16     | 1974.05     | 6117.11     | 0.88 | 0.08   | 0.13   | 0.24    | 0.56    |
| 0.48 | 176.89     | 617.89     | 1687.13     | 5189.01     | 0.89 | 0.07   | 0.11   | 0.18    | 0.37    |
| 0.49 | 148.44     | 525.35     | 1475.26     | 4447.14     | 0.90 | 0.06   | 0.09   | 0.13    | 0.25    |
| 0.50 | 124.71     | 436.66     | 1268.82     | 3755.01     |      |        |        |         |         |

Table S262: Critical values for detector  $\hat{H}_{mov}^{m,0.3}$  with windows size  $n = 0.3$ , and FM-OLS and D-OLS estimation in a model with intercept. The number of integrated regressors is 3 and the highest power of  $x_{kt}$  is 3.

| m    | 90 %       | 95 %        | 97,5 %      | 99 %         | m    | 90 %   | 95 %    | 97,5 %  | 99 %     |
|------|------------|-------------|-------------|--------------|------|--------|---------|---------|----------|
| 0.10 | 4820168.42 | 18900058.27 | 59399827.60 | 224253781.82 | 0.51 | 354.57 | 1314.68 | 3847.25 | 12870.03 |
| 0.11 | 3102828.93 | 12388275.58 | 38946243.54 | 144823522.32 | 0.52 | 296.37 | 1086.94 | 3258.18 | 10696.42 |
| 0.12 | 2068360.75 | 8125943.49  | 25882642.69 | 97282018.20  | 0.53 | 248.74 | 921.03  | 2720.43 | 8904.09  |
| 0.13 | 1411619.31 | 5582610.21  | 17809830.50 | 65226697.98  | 0.54 | 210.81 | 769.64  | 2287.30 | 7538.17  |
| 0.14 | 970379.74  | 3859582.81  | 12331861.48 | 46686694.32  | 0.55 | 176.74 | 654.08  | 1913.97 | 6521.61  |
| 0.15 | 687422.27  | 2758487.25  | 8792353.21  | 32290035.74  | 0.56 | 147.70 | 553.77  | 1583.96 | 5290.56  |
| 0.16 | 502002.53  | 1964463.91  | 6452090.35  | 23912772.23  | 0.57 | 125.05 | 456.07  | 1338.76 | 4337.98  |
| 0.17 | 372334.57  | 1473444.65  | 4550572.03  | 16804160.65  | 0.58 | 105.15 | 377.29  | 1117.14 | 3527.82  |
| 0.18 | 280763.41  | 1097867.36  | 3505679.22  | 12756546.43  | 0.59 | 88.54  | 320.98  | 946.24  | 2939.32  |
| 0.19 | 210437.23  | 827036.04   | 2596461.04  | 9519816.32   | 0.60 | 73.77  | 268.41  | 768.35  | 2508.35  |
| 0.20 | 158390.41  | 637686.61   | 1962746.81  | 7343829.68   | 0.61 | 61.22  | 224.29  | 643.23  | 2094.52  |
| 0.21 | 124204.85  | 484441.45   | 1513525.68  | 5522430.20   | 0.62 | 51.46  | 189.14  | 540.49  | 1791.80  |
| 0.22 | 93459.46   | 370244.95   | 1154788.56  | 4249158.02   | 0.63 | 42.93  | 156.62  | 446.48  | 1457.06  |
| 0.23 | 74096.51   | 287088.58   | 919103.01   | 3300446.14   | 0.64 | 35.21  | 126.46  | 376.73  | 1196.63  |
| 0.24 | 58878.19   | 229874.61   | 735252.27   | 2627681.15   | 0.65 | 29.26  | 103.10  | 305.20  | 976.34   |
| 0.25 | 46266.16   | 189370.93   | 591265.90   | 2119208.24   | 0.66 | 24.47  | 84.66   | 249.18  | 807.78   |
| 0.26 | 36707.60   | 144263.16   | 456170.09   | 1704567.98   | 0.67 | 19.97  | 70.89   | 203.54  | 654.63   |
| 0.27 | 29515.91   | 114450.91   | 362189.11   | 1326700.39   | 0.68 | 16.41  | 57.99   | 162.25  | 554.43   |
| 0.28 | 23557.38   | 93704.03    | 291149.87   | 1085513.82   | 0.69 | 13.47  | 47.14   | 133.61  | 454.91   |
| 0.29 | 19337.84   | 76728.04    | 232380.57   | 845374.27    | 0.70 | 10.99  | 37.96   | 105.71  | 340.16   |
| 0.30 | 15660.35   | 60958.94    | 183672.25   | 671572.58    | 0.71 | 9.10   | 30.87   | 85.40   | 273.11   |
| 0.31 | 12690.06   | 48865.29    | 150657.05   | 532202.26    | 0.72 | 7.41   | 25.13   | 69.61   | 216.97   |
| 0.32 | 10563.45   | 40812.48    | 123186.41   | 447637.49    | 0.73 | 6.01   | 20.18   | 55.22   | 175.91   |
| 0.33 | 8785.33    | 33708.41    | 103320.44   | 376205.21    | 0.74 | 4.85   | 16.45   | 44.19   | 141.96   |
| 0.34 | 7251.04    | 27984.12    | 86347.23    | 297408.39    | 0.75 | 3.95   | 12.95   | 34.99   | 110.84   |
| 0.35 | 6116.74    | 22993.28    | 69680.90    | 241881.65    | 0.76 | 3.22   | 10.31   | 28.09   | 84.03    |
| 0.36 | 5003.18    | 19417.50    | 58159.03    | 201646.54    | 0.77 | 2.60   | 8.12    | 22.27   | 67.63    |
| 0.37 | 4159.75    | 15816.92    | 49093.97    | 163554.73    | 0.78 | 2.08   | 6.36    | 17.38   | 52.92    |
| 0.38 | 3491.82    | 12983.71    | 40594.30    | 141266.16    | 0.79 | 1.66   | 5.05    | 13.17   | 40.86    |
| 0.39 | 2936.43    | 10945.19    | 32322.61    | 117377.24    | 0.80 | 1.31   | 3.91    | 10.14   | 30.75    |
| 0.40 | 2460.69    | 9283.92     | 27356.44    | 97328.02     | 0.81 | 1.03   | 3.00    | 8.02    | 23.74    |
| 0.41 | 2045.29    | 7648.21     | 22947.89    | 81284.09     | 0.82 | 0.81   | 2.29    | 6.06    | 17.45    |
| 0.42 | 1720.03    | 6382.31     | 19747.53    | 67161.91     | 0.83 | 0.64   | 1.76    | 4.55    | 12.82    |
| 0.43 | 1433.90    | 5386.93     | 15899.93    | 55869.54     | 0.84 | 0.50   | 1.34    | 3.31    | 9.43     |
| 0.44 | 1193.13    | 4431.52     | 13349.46    | 46125.54     | 0.85 | 0.39   | 0.99    | 2.47    | 6.95     |
| 0.45 | 979.37     | 3663.76     | 11074.42    | 36814.33     | 0.86 | 0.29   | 0.73    | 1.75    | 5.01     |
| 0.46 | 809.51     | 3112.24     | 9345.66     | 30583.94     | 0.87 | 0.23   | 0.54    | 1.25    | 3.41     |
| 0.47 | 680.70     | 2617.80     | 7827.24     | 26088.06     | 0.88 | 0.17   | 0.39    | 0.89    | 2.41     |
| 0.48 | 583.27     | 2199.22     | 6564.54     | 21843.88     | 0.89 | 0.13   | 0.28    | 0.64    | 1.61     |
| 0.49 | 497.97     | 1852.42     | 5549.85     | 18348.92     | 0.90 | 0.10   | 0.20    | 0.44    | 1.06     |
| 0.50 | 423.40     | 1561.59     | 4593.75     | 15381.49     |      |        |         |         |          |

Table S263: Critical values for detector  $\hat{H}_{mov}^{m,0.3}$  with windows size  $n = 0.3$ , and IM-OLS estimation in a model with intercept. The number of integrated regressors is 3 and the highest power of  $x_{kt}$  is 3.



| m    | 90 %       | 95 %       | 97,5 %      | 99 %        | m    | 90 %  | 95 %   | 97,5 % | 99 %    |
|------|------------|------------|-------------|-------------|------|-------|--------|--------|---------|
| 0.10 | 1422391.56 | 4903295.51 | 12841617.00 | 38717004.76 | 0.51 | 83.43 | 283.78 | 777.21 | 2394.01 |
| 0.11 | 901843.50  | 2994469.49 | 8379409.25  | 25589196.90 | 0.52 | 70.58 | 237.88 | 650.64 | 2013.83 |
| 0.12 | 591236.48  | 1970245.19 | 5463329.16  | 16691337.22 | 0.53 | 58.63 | 197.67 | 541.07 | 1648.91 |
| 0.13 | 397295.97  | 1313143.04 | 3597513.19  | 11193660.20 | 0.54 | 49.98 | 166.90 | 453.51 | 1398.41 |
| 0.14 | 259293.56  | 896368.34  | 2508584.55  | 7960889.59  | 0.55 | 42.13 | 140.66 | 388.56 | 1166.59 |
| 0.15 | 184313.03  | 630059.64  | 1817392.62  | 5656425.82  | 0.56 | 35.58 | 116.40 | 318.93 | 968.94  |
| 0.16 | 134117.78  | 450672.85  | 1247515.97  | 3999278.90  | 0.57 | 31.05 | 98.19  | 267.19 | 814.22  |
| 0.17 | 96259.72   | 332737.60  | 912810.46   | 2869007.01  | 0.58 | 26.11 | 83.81  | 226.82 | 705.18  |
| 0.18 | 71865.54   | 244942.12  | 684958.91   | 2099356.17  | 0.59 | 22.03 | 70.29  | 190.43 | 593.65  |
| 0.19 | 53275.64   | 182394.65  | 515219.23   | 1636441.81  | 0.60 | 18.50 | 58.97  | 159.22 | 496.61  |
| 0.20 | 40427.36   | 139014.20  | 374522.94   | 1191550.39  | 0.61 | 15.73 | 50.62  | 137.62 | 432.56  |
| 0.21 | 30852.17   | 105120.17  | 292338.34   | 941721.18   | 0.62 | 13.36 | 42.59  | 115.22 | 350.30  |
| 0.22 | 23651.48   | 81507.14   | 224257.36   | 698167.12   | 0.63 | 11.24 | 35.02  | 92.62  | 285.23  |
| 0.23 | 18130.73   | 63259.89   | 177477.50   | 560133.96   | 0.64 | 9.40  | 29.18  | 77.30  | 239.36  |
| 0.24 | 14248.48   | 49618.20   | 138245.74   | 432762.73   | 0.65 | 7.94  | 24.06  | 63.97  | 193.58  |
| 0.25 | 11473.01   | 39226.02   | 109970.73   | 343636.52   | 0.66 | 6.66  | 20.03  | 52.46  | 154.34  |
| 0.26 | 8873.18    | 31645.10   | 86745.71    | 267234.72   | 0.67 | 5.61  | 16.69  | 43.34  | 127.58  |
| 0.27 | 7091.95    | 25241.47   | 69509.16    | 215883.23   | 0.68 | 4.72  | 13.53  | 35.22  | 104.14  |
| 0.28 | 5703.51    | 20165.72   | 54713.79    | 173793.88   | 0.69 | 3.93  | 11.40  | 29.28  | 83.25   |
| 0.29 | 4670.49    | 15895.97   | 44134.94    | 134450.85   | 0.70 | 3.30  | 9.39   | 24.63  | 69.50   |
| 0.30 | 3730.48    | 12988.43   | 36451.38    | 107493.66   | 0.71 | 2.78  | 7.68   | 19.73  | 56.28   |
| 0.31 | 3035.30    | 10492.40   | 29338.67    | 94125.99    | 0.72 | 2.33  | 6.31   | 16.13  | 45.57   |
| 0.32 | 2505.87    | 8544.76    | 24472.01    | 76462.60    | 0.73 | 1.94  | 5.24   | 13.43  | 37.89   |
| 0.33 | 2045.92    | 7083.77    | 19915.95    | 60210.40    | 0.74 | 1.61  | 4.24   | 10.42  | 31.22   |
| 0.34 | 1660.19    | 5726.52    | 16273.97    | 48285.85    | 0.75 | 1.35  | 3.43   | 8.35   | 24.23   |
| 0.35 | 1403.29    | 4805.33    | 13275.09    | 40964.02    | 0.76 | 1.11  | 2.79   | 6.84   | 19.46   |
| 0.36 | 1147.24    | 4006.43    | 11306.40    | 34015.69    | 0.77 | 0.91  | 2.27   | 5.40   | 15.42   |
| 0.37 | 974.67     | 3342.49    | 9484.41     | 28360.65    | 0.78 | 0.76  | 1.83   | 4.29   | 11.31   |
| 0.38 | 793.12     | 2706.15    | 7882.16     | 23944.54    | 0.79 | 0.61  | 1.45   | 3.40   | 9.06    |
| 0.39 | 674.08     | 2269.06    | 6327.87     | 19871.53    | 0.80 | 0.50  | 1.15   | 2.64   | 6.91    |
| 0.40 | 557.45     | 1906.86    | 5191.49     | 16452.46    | 0.81 | 0.41  | 0.91   | 2.03   | 5.31    |
| 0.41 | 464.70     | 1584.04    | 4267.80     | 13781.72    | 0.82 | 0.32  | 0.72   | 1.62   | 4.15    |
| 0.42 | 387.49     | 1324.22    | 3576.13     | 11605.28    | 0.83 | 0.26  | 0.55   | 1.22   | 3.07    |
| 0.43 | 326.09     | 1108.80    | 3043.20     | 9395.98     | 0.84 | 0.21  | 0.42   | 0.90   | 2.23    |
| 0.44 | 276.58     | 931.72     | 2571.73     | 8073.43     | 0.85 | 0.16  | 0.32   | 0.67   | 1.69    |
| 0.45 | 229.64     | 779.03     | 2170.93     | 6772.40     | 0.86 | 0.13  | 0.24   | 0.48   | 1.17    |
| 0.46 | 194.60     | 658.84     | 1758.99     | 5488.12     | 0.87 | 0.10  | 0.18   | 0.34   | 0.84    |
| 0.47 | 165.06     | 554.51     | 1492.06     | 4650.68     | 0.88 | 0.07  | 0.13   | 0.25   | 0.58    |
| 0.48 | 139.16     | 467.28     | 1277.11     | 3909.50     | 0.89 | 0.06  | 0.10   | 0.17   | 0.38    |
| 0.49 | 116.78     | 402.04     | 1105.31     | 3385.38     | 0.90 | 0.04  | 0.07   | 0.12   | 0.25    |
| 0.50 | 98.53      | 338.55     | 958.98      | 2839.57     |      |       |        |        |         |

Table S264: Critical values for detector  $\hat{H}_{mov}^{m,0.1}$  with windows size  $n = 0.1$ , and FM-OLS and D-OLS estimation in a model with intercept and linear trend. The number of integrated regressors is 3 and the highest power of  $x_{kt}$  is 3.

| m    | 90 %       | 95 %        | 97,5 %      | 99 %         | m    | 90 %   | 95 %   | 97,5 %  | 99 %    |
|------|------------|-------------|-------------|--------------|------|--------|--------|---------|---------|
| 0.10 | 4543354.52 | 16006392.59 | 46977460.15 | 161430168.95 | 0.51 | 256.86 | 924.24 | 2661.34 | 9023.17 |
| 0.11 | 2867445.55 | 10053425.09 | 30038399.30 | 101379074.94 | 0.52 | 217.76 | 766.39 | 2247.04 | 7630.94 |
| 0.12 | 1876996.79 | 6655308.67  | 19478523.15 | 66903069.11  | 0.53 | 181.79 | 651.43 | 1903.09 | 6363.60 |
| 0.13 | 1217886.72 | 4515193.96  | 13050660.26 | 42785860.73  | 0.54 | 155.22 | 557.45 | 1624.90 | 5417.37 |
| 0.14 | 827611.38  | 3045222.00  | 8937735.75  | 29993940.58  | 0.55 | 131.71 | 481.47 | 1365.22 | 4594.39 |
| 0.15 | 581542.89  | 2131218.29  | 6432007.79  | 21891809.04  | 0.56 | 111.91 | 396.01 | 1134.70 | 3945.77 |
| 0.16 | 417401.44  | 1523545.33  | 4519782.14  | 15798797.42  | 0.57 | 94.98  | 332.54 | 952.43  | 3099.83 |
| 0.17 | 300823.75  | 1123815.85  | 3248535.02  | 10998427.14  | 0.58 | 79.93  | 274.24 | 801.48  | 2571.72 |
| 0.18 | 224802.87  | 829093.78   | 2486770.72  | 7939427.90   | 0.59 | 67.90  | 235.51 | 695.68  | 2169.98 |
| 0.19 | 168703.12  | 618686.62   | 1772474.26  | 6181567.41   | 0.60 | 57.18  | 199.28 | 583.76  | 1812.85 |
| 0.20 | 126640.82  | 466965.42   | 1357253.47  | 4822005.42   | 0.61 | 48.73  | 167.90 | 490.61  | 1548.12 |
| 0.21 | 96256.47   | 354914.64   | 1049121.88  | 3475317.83   | 0.62 | 41.53  | 142.07 | 414.30  | 1319.85 |
| 0.22 | 74834.88   | 275664.32   | 821712.25   | 2642652.02   | 0.63 | 34.54  | 117.34 | 341.56  | 1086.80 |
| 0.23 | 57338.80   | 211771.09   | 627894.08   | 2129193.12   | 0.64 | 28.16  | 97.89  | 283.11  | 902.54  |
| 0.24 | 45240.89   | 167431.82   | 496161.21   | 1710234.23   | 0.65 | 23.68  | 82.63  | 235.32  | 750.54  |
| 0.25 | 35609.94   | 130414.30   | 392250.89   | 1372564.22   | 0.66 | 19.91  | 67.53  | 197.36  | 603.59  |
| 0.26 | 28006.99   | 102366.60   | 308745.17   | 1096630.19   | 0.67 | 16.53  | 55.65  | 161.99  | 507.59  |
| 0.27 | 21991.84   | 80858.82    | 244894.55   | 899765.12    | 0.68 | 13.61  | 45.61  | 133.41  | 431.40  |
| 0.28 | 17733.35   | 65039.09    | 191474.58   | 694347.72    | 0.69 | 11.20  | 37.50  | 106.18  | 360.28  |
| 0.29 | 14355.98   | 52534.79    | 154251.79   | 534241.76    | 0.70 | 9.35   | 30.97  | 86.86   | 291.37  |
| 0.30 | 11547.01   | 42342.93    | 124797.25   | 422705.04    | 0.71 | 7.83   | 24.89  | 69.98   | 234.66  |
| 0.31 | 9474.90    | 34147.29    | 99853.89    | 339301.13    | 0.72 | 6.49   | 20.30  | 57.67   | 188.22  |
| 0.32 | 7702.36    | 27612.71    | 81387.01    | 289206.50    | 0.73 | 5.39   | 16.57  | 45.92   | 151.63  |
| 0.33 | 6284.85    | 23262.01    | 69092.12    | 238550.39    | 0.74 | 4.45   | 13.54  | 37.04   | 119.49  |
| 0.34 | 5218.32    | 18952.85    | 56573.21    | 194104.19    | 0.75 | 3.63   | 10.87  | 29.50   | 92.86   |
| 0.35 | 4325.28    | 15173.33    | 46340.26    | 159825.00    | 0.76 | 2.98   | 8.90   | 24.08   | 75.08   |
| 0.36 | 3603.91    | 12702.91    | 37854.87    | 128471.29    | 0.77 | 2.46   | 7.09   | 18.79   | 60.23   |
| 0.37 | 3037.33    | 10705.74    | 31524.62    | 102311.11    | 0.78 | 1.99   | 5.62   | 15.42   | 47.03   |
| 0.38 | 2510.27    | 8993.87     | 26619.64    | 87593.59     | 0.79 | 1.62   | 4.52   | 11.81   | 35.86   |
| 0.39 | 2073.57    | 7627.93     | 21226.71    | 71026.52     | 0.80 | 1.31   | 3.52   | 8.98    | 27.52   |
| 0.40 | 1736.94    | 6361.38     | 17696.47    | 60848.95     | 0.81 | 1.05   | 2.73   | 7.04    | 20.60   |
| 0.41 | 1427.42    | 5269.46     | 14893.85    | 50762.96     | 0.82 | 0.84   | 2.13   | 5.33    | 15.26   |
| 0.42 | 1203.19    | 4358.91     | 12720.56    | 43276.25     | 0.83 | 0.67   | 1.64   | 4.01    | 11.24   |
| 0.43 | 997.94     | 3636.57     | 10742.53    | 36726.53     | 0.84 | 0.53   | 1.26   | 2.95    | 8.28    |
| 0.44 | 840.74     | 3063.14     | 9001.92     | 29388.44     | 0.85 | 0.42   | 0.96   | 2.17    | 6.09    |
| 0.45 | 698.63     | 2555.69     | 7581.86     | 24300.81     | 0.86 | 0.32   | 0.72   | 1.60    | 4.23    |
| 0.46 | 579.52     | 2131.36     | 6556.67     | 20355.70     | 0.87 | 0.25   | 0.53   | 1.15    | 2.99    |
| 0.47 | 495.62     | 1825.65     | 5441.55     | 17666.28     | 0.88 | 0.19   | 0.39   | 0.84    | 2.04    |
| 0.48 | 419.15     | 1550.16     | 4541.62     | 15020.86     | 0.89 | 0.14   | 0.28   | 0.59    | 1.45    |
| 0.49 | 356.97     | 1308.74     | 3791.96     | 12615.04     | 0.90 | 0.11   | 0.20   | 0.41    | 0.97    |
| 0.50 | 302.24     | 1097.30     | 3216.24     | 10353.12     |      |        |        |         |         |

Table S265: Critical values for detector  $\hat{H}_{mov}^{m,0.1}$  with windows size  $n = 0.1$ , and IM-OLS estimation in a model with intercept and linear trend. The number of integrated regressors is 3 and the highest power of  $x_{kt}$  is 3.

| m    | 90 %       | 95 %       | 97,5 %      | 99 %        | m    | 90 %   | 95 %   | 97,5 %  | 99 %    |
|------|------------|------------|-------------|-------------|------|--------|--------|---------|---------|
| 0.10 | 1871702.94 | 6460384.13 | 17516905.23 | 53434200.62 | 0.51 | 109.52 | 369.36 | 1015.03 | 3086.43 |
| 0.11 | 1188359.89 | 4041309.81 | 11423498.96 | 36213895.97 | 0.52 | 91.64  | 309.29 | 853.37  | 2559.33 |
| 0.12 | 781118.62  | 2650359.15 | 7447912.63  | 23066646.53 | 0.53 | 76.54  | 256.49 | 701.30  | 2127.76 |
| 0.13 | 529703.10  | 1774354.86 | 4958037.06  | 15579406.11 | 0.54 | 64.87  | 216.20 | 583.49  | 1789.01 |
| 0.14 | 349309.17  | 1203557.39 | 3416091.98  | 10963896.02 | 0.55 | 54.77  | 182.28 | 497.55  | 1497.87 |
| 0.15 | 246816.10  | 850730.17  | 2465466.25  | 7944185.43  | 0.56 | 45.99  | 149.56 | 406.69  | 1229.44 |
| 0.16 | 179607.86  | 617844.03  | 1725773.34  | 5559329.58  | 0.57 | 39.96  | 125.44 | 341.06  | 1023.81 |
| 0.17 | 129529.03  | 455899.88  | 1250034.07  | 3990386.38  | 0.58 | 33.53  | 105.88 | 287.71  | 893.60  |
| 0.18 | 96472.43   | 335373.72  | 947134.83   | 2891326.45  | 0.59 | 28.04  | 88.16  | 242.28  | 735.37  |
| 0.19 | 71855.16   | 249280.06  | 714382.19   | 2266512.73  | 0.60 | 23.69  | 73.94  | 199.85  | 617.35  |
| 0.20 | 54324.98   | 189598.28  | 521025.82   | 1674704.09  | 0.61 | 19.93  | 62.83  | 169.43  | 524.26  |
| 0.21 | 41462.70   | 143793.95  | 403683.20   | 1318408.67  | 0.62 | 16.75  | 52.95  | 142.28  | 425.85  |
| 0.22 | 31753.98   | 111418.81  | 314460.08   | 990615.55   | 0.63 | 14.10  | 43.20  | 112.83  | 344.34  |
| 0.23 | 24549.26   | 86289.54   | 243121.69   | 778062.21   | 0.64 | 11.75  | 35.50  | 94.25   | 287.12  |
| 0.24 | 19239.52   | 67921.21   | 191096.22   | 605689.28   | 0.65 | 9.85   | 29.29  | 77.03   | 230.41  |
| 0.25 | 15597.82   | 54186.28   | 152072.88   | 478113.90   | 0.66 | 8.26   | 24.11  | 62.99   | 182.43  |
| 0.26 | 12092.97   | 43497.47   | 120738.74   | 379867.31   | 0.67 | 6.91   | 20.09  | 51.54   | 150.04  |
| 0.27 | 9663.31    | 34599.93   | 95973.56    | 304049.42   | 0.68 | 5.73   | 16.16  | 41.53   | 121.54  |
| 0.28 | 7779.37    | 27804.33   | 76045.62    | 245534.64   | 0.69 | 4.75   | 13.45  | 34.68   | 94.93   |
| 0.29 | 6367.65    | 21836.53   | 60953.97    | 186122.13   | 0.70 | 3.98   | 11.19  | 28.38   | 79.53   |
| 0.30 | 5055.30    | 17795.18   | 51059.08    | 150216.50   | 0.71 | 3.33   | 8.97   | 22.75   | 64.13   |
| 0.31 | 4112.44    | 14314.86   | 40242.97    | 129051.49   | 0.72 | 2.77   | 7.20   | 18.17   | 51.25   |
| 0.32 | 3406.29    | 11620.09   | 33779.90    | 104530.82   | 0.73 | 2.28   | 5.99   | 15.20   | 42.47   |
| 0.33 | 2765.49    | 9626.16    | 27435.25    | 83733.48    | 0.74 | 1.88   | 4.81   | 11.61   | 34.12   |
| 0.34 | 2230.09    | 7790.05    | 22550.31    | 66050.20    | 0.75 | 1.55   | 3.87   | 9.23    | 26.53   |
| 0.35 | 1885.96    | 6455.11    | 18202.01    | 56107.94    | 0.76 | 1.27   | 3.10   | 7.50    | 21.10   |
| 0.36 | 1543.80    | 5456.15    | 15356.60    | 46593.74    | 0.77 | 1.03   | 2.50   | 5.84    | 16.65   |
| 0.37 | 1310.98    | 4496.42    | 12796.30    | 38789.95    | 0.78 | 0.84   | 2.00   | 4.59    | 12.06   |
| 0.38 | 1063.06    | 3659.41    | 10559.78    | 32275.40    | 0.79 | 0.67   | 1.57   | 3.63    | 9.58    |
| 0.39 | 908.74     | 3073.80    | 8605.85     | 26919.49    | 0.80 | 0.54   | 1.24   | 2.80    | 7.17    |
| 0.40 | 747.44     | 2578.56    | 7059.81     | 22695.91    | 0.81 | 0.44   | 0.97   | 2.13    | 5.50    |
| 0.41 | 627.41     | 2144.45    | 5840.46     | 18873.72    | 0.82 | 0.35   | 0.75   | 1.68    | 4.27    |
| 0.42 | 521.71     | 1775.34    | 4842.92     | 15680.78    | 0.83 | 0.27   | 0.57   | 1.25    | 3.15    |
| 0.43 | 436.41     | 1483.20    | 4051.49     | 12593.92    | 0.84 | 0.22   | 0.43   | 0.92    | 2.28    |
| 0.44 | 365.03     | 1253.39    | 3458.52     | 10766.89    | 0.85 | 0.17   | 0.33   | 0.68    | 1.71    |
| 0.45 | 304.53     | 1040.20    | 2849.12     | 9034.78     | 0.86 | 0.13   | 0.24   | 0.48    | 1.18    |
| 0.46 | 259.61     | 875.32     | 2352.25     | 7314.89     | 0.87 | 0.10   | 0.18   | 0.34    | 0.84    |
| 0.47 | 218.15     | 733.16     | 1965.95     | 6288.16     | 0.88 | 0.08   | 0.13   | 0.25    | 0.58    |
| 0.48 | 183.23     | 624.08     | 1686.07     | 5234.65     | 0.89 | 0.06   | 0.10   | 0.17    | 0.38    |
| 0.49 | 153.85     | 530.30     | 1447.61     | 4428.83     | 0.90 | 0.05   | 0.07   | 0.12    | 0.26    |
| 0.50 | 129.77     | 439.11     | 1264.10     | 3718.25     |      |        |        |         |         |

Table S266: Critical values for detector  $\hat{H}_{mov}^{m,0.2}$  with windows size  $n = 0.2$ , and FM-OLS and D-OLS estimation in a model with intercept and linear trend. The number of integrated regressors is 3 and the highest power of  $x_{kt}$  is 3.

| m    | 90 %       | 95 %        | 97,5 %      | 99 %         | m    | 90 %   | 95 %    | 97,5 %  | 99 %     |
|------|------------|-------------|-------------|--------------|------|--------|---------|---------|----------|
| 0.10 | 5995924.23 | 21408917.34 | 63281089.60 | 223953545.61 | 0.51 | 333.81 | 1206.66 | 3514.27 | 11636.72 |
| 0.11 | 3760103.01 | 13621458.97 | 40717720.34 | 137372719.14 | 0.52 | 282.26 | 992.31  | 2947.40 | 9956.56  |
| 0.12 | 2490292.65 | 8892454.78  | 26604078.21 | 93127406.39  | 0.53 | 237.43 | 840.51  | 2471.56 | 8164.85  |
| 0.13 | 1615146.85 | 6046879.59  | 17825283.38 | 60621244.44  | 0.54 | 200.13 | 716.72  | 2086.06 | 6961.54  |
| 0.14 | 1098437.05 | 4114935.97  | 12100564.13 | 41657083.20  | 0.55 | 168.62 | 612.64  | 1750.97 | 5894.18  |
| 0.15 | 774059.48  | 2876082.58  | 8727232.50  | 30923582.90  | 0.56 | 144.09 | 500.07  | 1432.20 | 4954.44  |
| 0.16 | 557381.00  | 2033082.52  | 6137564.52  | 22210852.59  | 0.57 | 121.96 | 420.38  | 1212.77 | 3921.35  |
| 0.17 | 402282.26  | 1514140.07  | 4451944.78  | 15424841.95  | 0.58 | 101.75 | 349.93  | 1008.02 | 3231.42  |
| 0.18 | 302910.94  | 1122339.94  | 3407846.73  | 10972810.70  | 0.59 | 85.70  | 298.46  | 874.69  | 2714.69  |
| 0.19 | 225427.65  | 841228.24   | 2474345.14  | 8652086.64   | 0.60 | 72.76  | 248.69  | 725.52  | 2190.76  |
| 0.20 | 169011.45  | 635326.32   | 1860503.25  | 6756301.09   | 0.61 | 61.10  | 211.26  | 598.19  | 1912.43  |
| 0.21 | 130473.79  | 484577.49   | 1450132.59  | 4835120.29   | 0.62 | 51.83  | 175.58  | 508.37  | 1617.24  |
| 0.22 | 101194.11  | 375498.44   | 1131774.70  | 3679546.54   | 0.63 | 42.92  | 145.55  | 418.41  | 1329.43  |
| 0.23 | 77113.00   | 289063.71   | 863454.43   | 2923369.57   | 0.64 | 34.95  | 120.65  | 342.86  | 1080.50  |
| 0.24 | 60430.44   | 227108.76   | 682843.34   | 2350773.16   | 0.65 | 29.32  | 99.43   | 285.34  | 885.64   |
| 0.25 | 48112.68   | 179424.73   | 550624.68   | 1907081.82   | 0.66 | 24.45  | 81.73   | 234.82  | 717.19   |
| 0.26 | 37858.31   | 139784.44   | 427840.12   | 1538450.80   | 0.67 | 20.01  | 66.66   | 194.14  | 594.39   |
| 0.27 | 29782.77   | 109556.75   | 336427.16   | 1245105.99   | 0.68 | 16.58  | 54.10   | 157.12  | 498.49   |
| 0.28 | 24099.03   | 89284.18    | 261085.69   | 965347.69    | 0.69 | 13.60  | 44.58   | 124.75  | 417.77   |
| 0.29 | 19443.68   | 71708.55    | 213644.93   | 749776.16    | 0.70 | 11.21  | 36.13   | 100.63  | 332.95   |
| 0.30 | 15535.12   | 57785.70    | 172170.83   | 579983.57    | 0.71 | 9.29   | 29.01   | 80.63   | 265.47   |
| 0.31 | 12699.90   | 46243.50    | 136447.39   | 466229.35    | 0.72 | 7.68   | 23.40   | 65.90   | 209.42   |
| 0.32 | 10347.30   | 37873.77    | 112347.26   | 402284.72    | 0.73 | 6.33   | 19.04   | 52.18   | 168.60   |
| 0.33 | 8521.21    | 31453.98    | 94744.51    | 324704.68    | 0.74 | 5.16   | 15.28   | 41.48   | 132.67   |
| 0.34 | 7056.25    | 25691.09    | 78006.75    | 265315.31    | 0.75 | 4.19   | 12.16   | 32.87   | 100.87   |
| 0.35 | 5868.97    | 20728.12    | 63064.41    | 217158.84    | 0.76 | 3.39   | 9.88    | 26.59   | 81.22    |
| 0.36 | 4843.04    | 17211.60    | 51719.00    | 175231.40    | 0.77 | 2.78   | 7.87    | 20.65   | 65.63    |
| 0.37 | 4062.77    | 14575.63    | 42389.81    | 141158.41    | 0.78 | 2.23   | 6.12    | 16.48   | 50.11    |
| 0.38 | 3359.50    | 12256.28    | 35916.20    | 118319.81    | 0.79 | 1.80   | 4.86    | 12.55   | 37.80    |
| 0.39 | 2793.91    | 10242.20    | 28923.14    | 98035.26     | 0.80 | 1.43   | 3.79    | 9.61    | 28.70    |
| 0.40 | 2332.57    | 8538.12     | 24113.50    | 80909.25     | 0.81 | 1.13   | 2.91    | 7.35    | 21.44    |
| 0.41 | 1918.32    | 7092.59     | 20315.12    | 67733.29     | 0.82 | 0.90   | 2.24    | 5.52    | 15.73    |
| 0.42 | 1608.23    | 5865.81     | 17231.40    | 58086.19     | 0.83 | 0.72   | 1.71    | 4.13    | 11.64    |
| 0.43 | 1338.58    | 4859.94     | 14427.03    | 49339.21     | 0.84 | 0.56   | 1.30    | 3.04    | 8.38     |
| 0.44 | 1117.35    | 4097.40     | 12195.90    | 38951.56     | 0.85 | 0.43   | 0.98    | 2.21    | 6.20     |
| 0.45 | 926.56     | 3404.40     | 10116.38    | 32910.31     | 0.86 | 0.33   | 0.74    | 1.63    | 4.28     |
| 0.46 | 768.84     | 2823.95     | 8706.36     | 26898.98     | 0.87 | 0.25   | 0.54    | 1.16    | 3.00     |
| 0.47 | 650.62     | 2444.06     | 7255.62     | 23284.21     | 0.88 | 0.19   | 0.40    | 0.84    | 2.05     |
| 0.48 | 548.91     | 2058.91     | 5985.36     | 19945.51     | 0.89 | 0.14   | 0.29    | 0.60    | 1.45     |
| 0.49 | 468.34     | 1723.59     | 4994.28     | 16529.47     | 0.90 | 0.11   | 0.20    | 0.41    | 0.97     |
| 0.50 | 396.52     | 1441.33     | 4167.42     | 13696.30     |      |        |         |         |          |

Table S267: Critical values for detector  $\hat{H}_{mov}^{m,0.2}$  with windows size  $n = 0.2$ , and IM-OLS estimation in a model with intercept and linear trend. The number of integrated regressors is 3 and the highest power of  $x_{kt}$  is 3.

| m    | 90 %       | 95 %       | 97,5 %      | 99 %        | m    | 90 %   | 95 %   | 97,5 %  | 99 %    |
|------|------------|------------|-------------|-------------|------|--------|--------|---------|---------|
| 0.10 | 2011069.71 | 7020573.73 | 19159419.76 | 59414431.04 | 0.51 | 116.22 | 390.28 | 1067.77 | 3257.06 |
| 0.11 | 1281024.67 | 4402447.58 | 12435593.53 | 39865718.15 | 0.52 | 96.64  | 326.26 | 896.56  | 2645.80 |
| 0.12 | 848228.07  | 2860218.35 | 8113477.89  | 25215888.64 | 0.53 | 80.58  | 267.27 | 733.82  | 2221.13 |
| 0.13 | 570351.00  | 1920287.19 | 5431581.17  | 17275852.61 | 0.54 | 68.19  | 226.40 | 608.28  | 1863.04 |
| 0.14 | 376572.32  | 1309355.38 | 3738985.59  | 12177977.94 | 0.55 | 57.50  | 190.57 | 519.62  | 1551.84 |
| 0.15 | 268236.08  | 928049.87  | 2705764.27  | 8670309.21  | 0.56 | 48.34  | 156.53 | 420.00  | 1261.98 |
| 0.16 | 193358.93  | 672586.98  | 1890342.95  | 6159539.36  | 0.57 | 41.83  | 130.66 | 353.34  | 1063.92 |
| 0.17 | 139969.44  | 496672.43  | 1372828.10  | 4390912.75  | 0.58 | 35.12  | 109.32 | 297.77  | 919.46  |
| 0.18 | 104773.61  | 366078.70  | 1036205.25  | 3208175.48  | 0.59 | 29.29  | 90.91  | 249.39  | 757.64  |
| 0.19 | 77987.81   | 271266.58  | 784394.30   | 2497799.32  | 0.60 | 24.69  | 76.31  | 206.18  | 632.49  |
| 0.20 | 59074.53   | 207368.88  | 575272.91   | 1849813.14  | 0.61 | 20.69  | 64.89  | 173.58  | 533.52  |
| 0.21 | 44914.58   | 157177.36  | 438017.92   | 1454597.19  | 0.62 | 17.39  | 54.49  | 145.18  | 435.61  |
| 0.22 | 34376.78   | 121787.22  | 343991.60   | 1079373.09  | 0.63 | 14.60  | 44.35  | 115.62  | 349.84  |
| 0.23 | 26549.08   | 94158.69   | 266989.75   | 851213.79   | 0.64 | 12.08  | 36.24  | 96.00   | 291.17  |
| 0.24 | 20871.09   | 74012.52   | 208223.12   | 670451.00   | 0.65 | 10.12  | 29.80  | 78.20   | 233.41  |
| 0.25 | 16823.55   | 58723.91   | 165647.09   | 529404.93   | 0.66 | 8.48   | 24.59  | 64.16   | 184.82  |
| 0.26 | 13135.93   | 47201.75   | 131093.07   | 413806.56   | 0.67 | 7.05   | 20.37  | 51.87   | 151.88  |
| 0.27 | 10460.47   | 37505.46   | 104454.09   | 330315.35   | 0.68 | 5.84   | 16.37  | 41.97   | 122.82  |
| 0.28 | 8458.34    | 30298.24   | 82782.30    | 267712.60   | 0.69 | 4.83   | 13.61  | 35.01   | 95.73   |
| 0.29 | 6859.92    | 23794.92   | 66016.31    | 203667.43   | 0.70 | 4.04   | 11.28  | 28.58   | 80.09   |
| 0.30 | 5468.64    | 19246.91   | 55405.28    | 164557.20   | 0.71 | 3.37   | 9.02   | 22.85   | 64.24   |
| 0.31 | 4454.45    | 15472.28   | 43647.65    | 143017.62   | 0.72 | 2.79   | 7.24   | 18.27   | 51.40   |
| 0.32 | 3674.14    | 12629.15   | 36654.07    | 113056.95   | 0.73 | 2.29   | 6.01   | 15.22   | 42.58   |
| 0.33 | 2988.91    | 10432.97   | 29867.65    | 91267.60    | 0.74 | 1.89   | 4.83   | 11.63   | 34.12   |
| 0.34 | 2415.13    | 8389.38    | 24368.59    | 71532.62    | 0.75 | 1.56   | 3.88   | 9.24    | 26.53   |
| 0.35 | 2033.77    | 6966.84    | 19748.83    | 61105.42    | 0.76 | 1.27   | 3.10   | 7.51    | 21.10   |
| 0.36 | 1655.84    | 5865.32    | 16719.34    | 50649.07    | 0.77 | 1.03   | 2.51   | 5.85    | 16.66   |
| 0.37 | 1414.86    | 4847.10    | 13864.17    | 42048.20    | 0.78 | 0.85   | 2.01   | 4.60    | 12.07   |
| 0.38 | 1141.73    | 3947.10    | 11442.05    | 35218.52    | 0.79 | 0.68   | 1.57   | 3.63    | 9.58    |
| 0.39 | 978.47     | 3307.09    | 9321.45     | 28963.97    | 0.80 | 0.55   | 1.24   | 2.80    | 7.17    |
| 0.40 | 804.53     | 2768.19    | 7575.57     | 24299.15    | 0.81 | 0.44   | 0.97   | 2.13    | 5.50    |
| 0.41 | 672.93     | 2296.16    | 6259.45     | 20131.07    | 0.82 | 0.35   | 0.75   | 1.68    | 4.27    |
| 0.42 | 559.98     | 1894.24    | 5199.09     | 16852.86    | 0.83 | 0.28   | 0.57   | 1.26    | 3.15    |
| 0.43 | 465.54     | 1583.73    | 4309.03     | 13451.87    | 0.84 | 0.22   | 0.44   | 0.93    | 2.28    |
| 0.44 | 392.70     | 1337.85    | 3663.06     | 11578.77    | 0.85 | 0.17   | 0.33   | 0.69    | 1.71    |
| 0.45 | 325.39     | 1113.76    | 3033.24     | 9570.43     | 0.86 | 0.13   | 0.24   | 0.49    | 1.19    |
| 0.46 | 275.51     | 932.33     | 2498.90     | 7729.26     | 0.87 | 0.10   | 0.18   | 0.34    | 0.85    |
| 0.47 | 232.76     | 777.75     | 2082.42     | 6623.62     | 0.88 | 0.08   | 0.14   | 0.25    | 0.58    |
| 0.48 | 194.94     | 661.87     | 1778.47     | 5476.70     | 0.89 | 0.07   | 0.10   | 0.18    | 0.39    |
| 0.49 | 163.69     | 560.80     | 1537.33     | 4658.15     | 0.90 | 0.05   | 0.08   | 0.13    | 0.26    |
| 0.50 | 137.30     | 464.70     | 1329.82     | 3914.31     |      |        |        |         |         |

Table S268: Critical values for detector  $\hat{H}_{mov}^{m,0.3}$  with windows size  $n = 0.3$ , and FM-OLS and D-OLS estimation in a model with intercept and linear trend. The number of integrated regressors is 3 and the highest power of  $x_{kt}$  is 3.

| m    | 90 %       | 95 %        | 97,5 %      | 99 %         | m    | 90 %   | 95 %    | 97,5 %  | 99 %     |
|------|------------|-------------|-------------|--------------|------|--------|---------|---------|----------|
| 0.10 | 6477140.35 | 23280684.06 | 69266509.24 | 244954618.54 | 0.51 | 353.42 | 1263.46 | 3673.04 | 12266.65 |
| 0.11 | 4031666.50 | 14751099.49 | 44375560.20 | 148572911.94 | 0.52 | 296.25 | 1045.03 | 3081.08 | 10381.27 |
| 0.12 | 2679659.68 | 9646712.21  | 29200252.04 | 101688126.08 | 0.53 | 250.33 | 882.08  | 2574.23 | 8520.57  |
| 0.13 | 1740830.88 | 6520300.93  | 19477920.29 | 67192983.92  | 0.54 | 210.45 | 753.59  | 2179.45 | 7257.79  |
| 0.14 | 1185117.28 | 4452549.08  | 13310096.20 | 46641048.96  | 0.55 | 176.85 | 640.41  | 1825.01 | 6096.27  |
| 0.15 | 833558.72  | 3116665.20  | 9528598.50  | 33679233.15  | 0.56 | 150.94 | 518.52  | 1506.39 | 5170.06  |
| 0.16 | 598697.97  | 2220276.52  | 6769660.98  | 24317291.42  | 0.57 | 127.40 | 436.65  | 1253.14 | 4085.23  |
| 0.17 | 435313.16  | 1636586.21  | 4909867.99  | 17060504.99  | 0.58 | 106.04 | 363.50  | 1034.74 | 3339.34  |
| 0.18 | 325569.55  | 1222342.88  | 3731921.63  | 12010425.17  | 0.59 | 89.19  | 308.07  | 908.34  | 2779.71  |
| 0.19 | 243279.23  | 913522.02   | 2710571.08  | 9562792.94   | 0.60 | 75.76  | 257.64  | 745.04  | 2259.66  |
| 0.20 | 183229.83  | 694148.99   | 2019890.03  | 7422927.74   | 0.61 | 63.29  | 216.85  | 613.94  | 1966.14  |
| 0.21 | 141055.90  | 526394.98   | 1585245.38  | 5316452.41   | 0.62 | 53.49  | 180.30  | 519.78  | 1643.17  |
| 0.22 | 109235.27  | 409851.92   | 1240772.06  | 4049278.93   | 0.63 | 44.16  | 149.06  | 427.62  | 1348.79  |
| 0.23 | 83187.07   | 315919.33   | 940814.32   | 3240744.31   | 0.64 | 35.97  | 122.99  | 351.17  | 1099.54  |
| 0.24 | 65325.80   | 246199.00   | 749461.34   | 2558444.63   | 0.65 | 30.17  | 101.53  | 290.17  | 902.36   |
| 0.25 | 51920.79   | 195289.55   | 596543.01   | 2084611.18   | 0.66 | 25.01  | 83.23   | 236.99  | 725.17   |
| 0.26 | 40840.29   | 152387.22   | 468408.65   | 1685322.75   | 0.67 | 20.44  | 67.73   | 196.32  | 597.66   |
| 0.27 | 32409.81   | 118056.23   | 367264.22   | 1342038.14   | 0.68 | 16.90  | 55.13   | 158.94  | 501.79   |
| 0.28 | 26049.94   | 97158.16    | 285679.71   | 1054179.86   | 0.69 | 13.84  | 44.97   | 126.24  | 419.89   |
| 0.29 | 21024.15   | 78045.22    | 231958.17   | 820169.67    | 0.70 | 11.38  | 36.42   | 101.49  | 334.37   |
| 0.30 | 16794.96   | 62669.94    | 185797.83   | 638841.41    | 0.71 | 9.40   | 29.16   | 81.23   | 266.12   |
| 0.31 | 13734.60   | 50179.97    | 148367.98   | 511554.04    | 0.72 | 7.75   | 23.56   | 66.08   | 209.88   |
| 0.32 | 11142.29   | 40802.83    | 122650.76   | 437402.96    | 0.73 | 6.38   | 19.12   | 52.28   | 169.22   |
| 0.33 | 9201.93    | 34034.76    | 102036.43   | 357432.27    | 0.74 | 5.19   | 15.33   | 41.59   | 132.68   |
| 0.34 | 7571.75    | 27855.58    | 84126.06    | 284955.67    | 0.75 | 4.20   | 12.19   | 32.88   | 100.99   |
| 0.35 | 6319.35    | 22460.27    | 68354.71    | 236368.94    | 0.76 | 3.40   | 9.90    | 26.61   | 81.25    |
| 0.36 | 5217.55    | 18560.72    | 55921.36    | 189487.94    | 0.77 | 2.79   | 7.87    | 20.66   | 65.63    |
| 0.37 | 4367.65    | 15724.83    | 45620.70    | 153354.67    | 0.78 | 2.23   | 6.13    | 16.50   | 50.11    |
| 0.38 | 3592.86    | 13210.52    | 38608.55    | 127330.14    | 0.79 | 1.80   | 4.86    | 12.55   | 37.80    |
| 0.39 | 3006.79    | 11041.62    | 30972.33    | 106078.26    | 0.80 | 1.43   | 3.80    | 9.61    | 28.71    |
| 0.40 | 2499.32    | 9218.03     | 25923.23    | 87270.95     | 0.81 | 1.14   | 2.91    | 7.35    | 21.44    |
| 0.41 | 2055.81    | 7627.01     | 21765.11    | 71883.32     | 0.82 | 0.90   | 2.24    | 5.52    | 15.73    |
| 0.42 | 1718.58    | 6307.04     | 18353.10    | 62117.18     | 0.83 | 0.72   | 1.71    | 4.13    | 11.64    |
| 0.43 | 1431.85    | 5204.16     | 15401.98    | 52863.79     | 0.84 | 0.56   | 1.30    | 3.04    | 8.39     |
| 0.44 | 1189.45    | 4355.56     | 12911.31    | 41911.79     | 0.85 | 0.44   | 0.99    | 2.21    | 6.20     |
| 0.45 | 989.64     | 3611.56     | 10773.80    | 35140.25     | 0.86 | 0.34   | 0.74    | 1.63    | 4.28     |
| 0.46 | 817.68     | 3007.91     | 9221.61     | 28726.79     | 0.87 | 0.26   | 0.54    | 1.16    | 3.00     |
| 0.47 | 691.41     | 2610.96     | 7681.93     | 24517.05     | 0.88 | 0.19   | 0.40    | 0.84    | 2.05     |
| 0.48 | 584.27     | 2175.45     | 6349.51     | 21041.74     | 0.89 | 0.15   | 0.29    | 0.60    | 1.45     |
| 0.49 | 496.31     | 1832.85     | 5294.90     | 17709.18     | 0.90 | 0.11   | 0.21    | 0.41    | 0.97     |
| 0.50 | 419.52     | 1522.50     | 4385.18     | 14358.94     |      |        |         |         |          |

Table S269: Critical values for detector  $\hat{H}_{mov}^{m,0.3}$  with windows size  $n = 0.3$ , and IM-OLS estimation in a model with intercept and linear trend. The number of integrated regressors is 3 and the highest power of  $x_{kt}$  is 3.

#### 4.4 Number of I(1) regressors: 4

| m    | 90 %   | 95 %   | 97,5 %  | 99 %    | m    | 90 % | 95 % | 97,5 % | 99 %  |
|------|--------|--------|---------|---------|------|------|------|--------|-------|
| 0.10 | 566.96 | 911.13 | 1340.86 | 2041.65 | 0.51 | 3.63 | 5.83 | 8.54   | 13.08 |
| 0.11 | 453.01 | 722.56 | 1069.74 | 1618.55 | 0.52 | 3.30 | 5.28 | 7.73   | 11.95 |
| 0.12 | 368.22 | 590.72 | 865.60  | 1328.33 | 0.53 | 3.01 | 4.77 | 7.02   | 10.88 |
| 0.13 | 300.74 | 482.93 | 718.44  | 1086.08 | 0.54 | 2.72 | 4.32 | 6.38   | 9.79  |
| 0.14 | 248.59 | 396.90 | 591.96  | 921.66  | 0.55 | 2.46 | 3.95 | 5.75   | 8.84  |
| 0.15 | 208.99 | 335.68 | 497.35  | 774.10  | 0.56 | 2.25 | 3.59 | 5.23   | 8.00  |
| 0.16 | 175.51 | 283.99 | 420.82  | 649.10  | 0.57 | 2.04 | 3.27 | 4.76   | 7.16  |
| 0.17 | 149.29 | 241.27 | 358.75  | 546.93  | 0.58 | 1.85 | 2.96 | 4.28   | 6.45  |
| 0.18 | 127.81 | 206.99 | 306.33  | 469.93  | 0.59 | 1.69 | 2.67 | 3.85   | 5.82  |
| 0.19 | 110.41 | 175.88 | 265.21  | 411.83  | 0.60 | 1.53 | 2.43 | 3.51   | 5.24  |
| 0.20 | 95.41  | 153.19 | 227.99  | 349.59  | 0.61 | 1.39 | 2.21 | 3.17   | 4.74  |
| 0.21 | 84.27  | 135.25 | 198.95  | 303.67  | 0.62 | 1.26 | 1.98 | 2.88   | 4.29  |
| 0.22 | 74.05  | 118.26 | 174.24  | 267.42  | 0.63 | 1.14 | 1.78 | 2.58   | 3.86  |
| 0.23 | 64.70  | 104.46 | 155.23  | 235.33  | 0.64 | 1.03 | 1.60 | 2.31   | 3.48  |
| 0.24 | 57.01  | 92.82  | 137.61  | 209.97  | 0.65 | 0.92 | 1.43 | 2.07   | 3.09  |
| 0.25 | 50.49  | 82.03  | 121.92  | 187.83  | 0.66 | 0.83 | 1.30 | 1.87   | 2.80  |
| 0.26 | 44.81  | 72.62  | 109.24  | 167.91  | 0.67 | 0.74 | 1.16 | 1.65   | 2.47  |
| 0.27 | 40.08  | 64.81  | 95.78   | 149.12  | 0.68 | 0.67 | 1.03 | 1.48   | 2.22  |
| 0.28 | 35.73  | 58.43  | 85.43   | 133.04  | 0.69 | 0.60 | 0.93 | 1.32   | 1.98  |
| 0.29 | 31.69  | 51.81  | 76.97   | 119.15  | 0.70 | 0.54 | 0.83 | 1.18   | 1.75  |
| 0.30 | 28.05  | 46.09  | 67.86   | 104.85  | 0.71 | 0.48 | 0.74 | 1.05   | 1.55  |
| 0.31 | 25.49  | 41.21  | 61.62   | 94.46   | 0.72 | 0.42 | 0.65 | 0.93   | 1.37  |
| 0.32 | 22.89  | 37.33  | 54.61   | 84.88   | 0.73 | 0.38 | 0.58 | 0.81   | 1.22  |
| 0.33 | 20.71  | 33.63  | 49.07   | 77.18   | 0.74 | 0.34 | 0.51 | 0.73   | 1.08  |
| 0.34 | 18.53  | 30.03  | 44.71   | 70.25   | 0.75 | 0.30 | 0.45 | 0.64   | 0.95  |
| 0.35 | 16.73  | 26.92  | 40.15   | 63.34   | 0.76 | 0.27 | 0.40 | 0.56   | 0.81  |
| 0.36 | 15.16  | 24.31  | 36.18   | 56.26   | 0.77 | 0.23 | 0.35 | 0.49   | 0.71  |
| 0.37 | 13.64  | 22.00  | 32.75   | 50.09   | 0.78 | 0.20 | 0.30 | 0.42   | 0.61  |
| 0.38 | 12.34  | 19.91  | 29.57   | 44.76   | 0.79 | 0.18 | 0.27 | 0.37   | 0.52  |
| 0.39 | 11.28  | 18.05  | 26.84   | 40.73   | 0.80 | 0.15 | 0.23 | 0.32   | 0.45  |
| 0.40 | 10.25  | 16.61  | 24.46   | 37.07   | 0.81 | 0.13 | 0.20 | 0.27   | 0.38  |
| 0.41 | 9.34   | 15.01  | 22.18   | 34.21   | 0.82 | 0.11 | 0.17 | 0.23   | 0.32  |
| 0.42 | 8.49   | 13.69  | 20.40   | 30.99   | 0.83 | 0.10 | 0.14 | 0.20   | 0.27  |
| 0.43 | 7.70   | 12.45  | 18.41   | 28.65   | 0.84 | 0.08 | 0.12 | 0.16   | 0.23  |
| 0.44 | 7.03   | 11.38  | 16.86   | 25.78   | 0.85 | 0.07 | 0.10 | 0.14   | 0.19  |
| 0.45 | 6.36   | 10.27  | 15.18   | 23.48   | 0.86 | 0.06 | 0.08 | 0.11   | 0.15  |
| 0.46 | 5.76   | 9.30   | 13.78   | 21.30   | 0.87 | 0.05 | 0.07 | 0.09   | 0.12  |
| 0.47 | 5.23   | 8.51   | 12.53   | 19.44   | 0.88 | 0.04 | 0.05 | 0.07   | 0.10  |
| 0.48 | 4.77   | 7.80   | 11.45   | 17.64   | 0.89 | 0.03 | 0.04 | 0.06   | 0.08  |
| 0.49 | 4.35   | 7.08   | 10.35   | 15.98   | 0.90 | 0.02 | 0.03 | 0.04   | 0.06  |
| 0.50 | 3.98   | 6.40   | 9.40    | 14.40   |      |      |      |        |       |

Table S270: Critical values for detector  $\hat{H}_{mov}^{m,0.1}$  with windows size  $n = 0.1$ , and FM-OLS and D-OLS estimation in a model with intercept. The number of integrated regressors is 4 and the highest power of  $x_{kt}$  is 1.

| m    | 90 %    | 95 %    | 97,5 %  | 99 %    | m    | 90 % | 95 %  | 97,5 % | 99 %  |
|------|---------|---------|---------|---------|------|------|-------|--------|-------|
| 0.10 | 1146.72 | 1909.50 | 2919.57 | 4649.31 | 0.51 | 7.18 | 11.94 | 18.01  | 28.74 |
| 0.11 | 908.65  | 1516.53 | 2304.90 | 3762.00 | 0.52 | 6.53 | 10.81 | 16.54  | 26.27 |
| 0.12 | 740.04  | 1228.33 | 1870.31 | 2999.28 | 0.53 | 5.96 | 9.89  | 15.07  | 23.87 |
| 0.13 | 604.14  | 998.62  | 1553.58 | 2471.30 | 0.54 | 5.43 | 9.05  | 13.73  | 21.83 |
| 0.14 | 496.72  | 825.63  | 1278.56 | 2100.57 | 0.55 | 4.95 | 8.23  | 12.46  | 19.78 |
| 0.15 | 413.28  | 683.89  | 1079.48 | 1743.07 | 0.56 | 4.52 | 7.42  | 11.29  | 17.80 |
| 0.16 | 352.28  | 585.36  | 913.56  | 1481.01 | 0.57 | 4.11 | 6.75  | 10.12  | 15.99 |
| 0.17 | 299.94  | 503.11  | 771.75  | 1254.30 | 0.58 | 3.74 | 6.10  | 9.18   | 14.47 |
| 0.18 | 256.76  | 429.07  | 659.28  | 1063.11 | 0.59 | 3.36 | 5.51  | 8.31   | 13.07 |
| 0.19 | 220.45  | 370.55  | 570.35  | 918.98  | 0.60 | 3.06 | 5.02  | 7.52   | 11.87 |
| 0.20 | 193.19  | 322.98  | 491.93  | 790.80  | 0.61 | 2.76 | 4.52  | 6.73   | 10.68 |
| 0.21 | 167.99  | 281.51  | 434.73  | 699.03  | 0.62 | 2.51 | 4.09  | 6.01   | 9.62  |
| 0.22 | 146.34  | 245.12  | 376.69  | 612.78  | 0.63 | 2.28 | 3.71  | 5.50   | 8.63  |
| 0.23 | 128.39  | 215.25  | 335.21  | 538.89  | 0.64 | 2.05 | 3.36  | 4.99   | 7.71  |
| 0.24 | 113.31  | 190.76  | 294.30  | 481.33  | 0.65 | 1.85 | 3.04  | 4.52   | 6.94  |
| 0.25 | 101.41  | 171.35  | 260.77  | 421.81  | 0.66 | 1.68 | 2.72  | 4.05   | 6.21  |
| 0.26 | 89.92   | 152.15  | 231.67  | 377.66  | 0.67 | 1.50 | 2.44  | 3.60   | 5.58  |
| 0.27 | 80.22   | 134.32  | 203.49  | 330.06  | 0.68 | 1.35 | 2.17  | 3.19   | 4.90  |
| 0.28 | 71.38   | 120.30  | 182.45  | 295.16  | 0.69 | 1.21 | 1.94  | 2.85   | 4.41  |
| 0.29 | 63.71   | 107.35  | 164.96  | 265.39  | 0.70 | 1.08 | 1.73  | 2.54   | 3.92  |
| 0.30 | 57.32   | 95.24   | 147.03  | 240.75  | 0.71 | 0.96 | 1.54  | 2.26   | 3.51  |
| 0.31 | 51.09   | 85.99   | 132.91  | 217.32  | 0.72 | 0.86 | 1.36  | 2.00   | 3.11  |
| 0.32 | 46.14   | 77.61   | 119.57  | 194.99  | 0.73 | 0.76 | 1.20  | 1.77   | 2.69  |
| 0.33 | 41.60   | 69.99   | 108.26  | 175.65  | 0.74 | 0.68 | 1.07  | 1.58   | 2.38  |
| 0.34 | 37.11   | 62.94   | 97.07   | 158.26  | 0.75 | 0.60 | 0.95  | 1.39   | 2.11  |
| 0.35 | 33.61   | 56.63   | 87.84   | 140.72  | 0.76 | 0.53 | 0.84  | 1.22   | 1.86  |
| 0.36 | 30.31   | 50.75   | 78.27   | 127.74  | 0.77 | 0.46 | 0.74  | 1.07   | 1.62  |
| 0.37 | 27.28   | 45.90   | 70.71   | 114.30  | 0.78 | 0.40 | 0.64  | 0.93   | 1.40  |
| 0.38 | 24.77   | 41.26   | 63.99   | 103.30  | 0.79 | 0.36 | 0.56  | 0.81   | 1.21  |
| 0.39 | 22.47   | 37.68   | 57.27   | 93.34   | 0.80 | 0.31 | 0.49  | 0.69   | 1.04  |
| 0.40 | 20.30   | 34.03   | 52.11   | 85.80   | 0.81 | 0.27 | 0.42  | 0.60   | 0.88  |
| 0.41 | 18.53   | 31.15   | 47.33   | 78.36   | 0.82 | 0.23 | 0.36  | 0.51   | 0.75  |
| 0.42 | 16.90   | 28.21   | 43.28   | 70.47   | 0.83 | 0.20 | 0.31  | 0.44   | 0.64  |
| 0.43 | 15.33   | 25.66   | 39.17   | 63.24   | 0.84 | 0.17 | 0.26  | 0.37   | 0.53  |
| 0.44 | 14.00   | 23.38   | 35.86   | 57.52   | 0.85 | 0.14 | 0.22  | 0.31   | 0.45  |
| 0.45 | 12.69   | 21.29   | 32.91   | 52.15   | 0.86 | 0.12 | 0.18  | 0.26   | 0.37  |
| 0.46 | 11.55   | 19.45   | 29.76   | 47.02   | 0.87 | 0.10 | 0.15  | 0.21   | 0.31  |
| 0.47 | 10.57   | 17.63   | 26.80   | 42.65   | 0.88 | 0.08 | 0.12  | 0.17   | 0.25  |
| 0.48 | 9.59    | 15.98   | 24.34   | 39.00   | 0.89 | 0.07 | 0.10  | 0.14   | 0.20  |
| 0.49 | 8.68    | 14.58   | 21.91   | 35.12   | 0.90 | 0.05 | 0.08  | 0.11   | 0.15  |
| 0.50 | 7.88    | 13.18   | 19.98   | 31.78   |      |      |       |        |       |

Table S271: Critical values for detector  $\hat{H}_{mov}^{m,0.1}$  with windows size  $n = 0.1$ , and IM-OLS estimation in a model with intercept. The number of integrated regressors is 4 and the highest power of  $x_{kt}$  is 1.



| m    | 90 %   | 95 %    | 97,5 %  | 99 %    | m    | 90 % | 95 % | 97,5 % | 99 %  |
|------|--------|---------|---------|---------|------|------|------|--------|-------|
| 0.10 | 911.64 | 1481.38 | 2197.05 | 3367.04 | 0.51 | 5.42 | 8.69 | 12.76  | 19.36 |
| 0.11 | 730.57 | 1175.02 | 1745.20 | 2668.27 | 0.52 | 4.90 | 7.85 | 11.42  | 17.61 |
| 0.12 | 593.84 | 961.50  | 1412.33 | 2178.76 | 0.53 | 4.45 | 7.04 | 10.32  | 15.90 |
| 0.13 | 484.81 | 784.11  | 1169.22 | 1786.57 | 0.54 | 3.98 | 6.34 | 9.36   | 14.32 |
| 0.14 | 401.03 | 643.25  | 972.55  | 1510.56 | 0.55 | 3.62 | 5.75 | 8.40   | 12.70 |
| 0.15 | 336.02 | 547.76  | 811.12  | 1273.54 | 0.56 | 3.28 | 5.19 | 7.58   | 11.52 |
| 0.16 | 283.81 | 463.85  | 687.66  | 1062.93 | 0.57 | 2.95 | 4.71 | 6.86   | 10.24 |
| 0.17 | 240.80 | 394.15  | 586.59  | 893.91  | 0.58 | 2.65 | 4.22 | 6.12   | 9.18  |
| 0.18 | 206.01 | 336.93  | 502.01  | 770.07  | 0.59 | 2.41 | 3.81 | 5.50   | 8.28  |
| 0.19 | 177.56 | 285.84  | 432.65  | 675.19  | 0.60 | 2.18 | 3.46 | 4.97   | 7.39  |
| 0.20 | 154.21 | 249.56  | 372.20  | 576.00  | 0.61 | 1.96 | 3.10 | 4.47   | 6.63  |
| 0.21 | 135.97 | 219.02  | 323.01  | 495.51  | 0.62 | 1.76 | 2.77 | 4.00   | 5.96  |
| 0.22 | 119.24 | 191.49  | 283.74  | 435.94  | 0.63 | 1.58 | 2.46 | 3.55   | 5.32  |
| 0.23 | 104.29 | 168.40  | 251.74  | 383.93  | 0.64 | 1.42 | 2.21 | 3.17   | 4.72  |
| 0.24 | 91.61  | 150.33  | 220.82  | 342.92  | 0.65 | 1.26 | 1.97 | 2.80   | 4.19  |
| 0.25 | 80.81  | 132.57  | 196.98  | 305.67  | 0.66 | 1.12 | 1.76 | 2.51   | 3.72  |
| 0.26 | 71.92  | 116.75  | 175.83  | 274.05  | 0.67 | 1.00 | 1.54 | 2.21   | 3.27  |
| 0.27 | 64.00  | 104.07  | 155.30  | 241.08  | 0.68 | 0.89 | 1.37 | 1.94   | 2.92  |
| 0.28 | 57.04  | 93.73   | 137.23  | 213.53  | 0.69 | 0.79 | 1.22 | 1.72   | 2.55  |
| 0.29 | 50.37  | 83.10   | 123.98  | 191.34  | 0.70 | 0.71 | 1.09 | 1.54   | 2.25  |
| 0.30 | 44.53  | 73.63   | 108.64  | 168.53  | 0.71 | 0.62 | 0.95 | 1.35   | 1.98  |
| 0.31 | 40.39  | 65.57   | 98.27   | 151.42  | 0.72 | 0.54 | 0.83 | 1.17   | 1.73  |
| 0.32 | 36.32  | 59.28   | 87.70   | 136.59  | 0.73 | 0.48 | 0.73 | 1.02   | 1.50  |
| 0.33 | 32.72  | 53.42   | 77.87   | 122.38  | 0.74 | 0.42 | 0.63 | 0.89   | 1.32  |
| 0.34 | 29.25  | 47.60   | 70.85   | 112.11  | 0.75 | 0.37 | 0.56 | 0.78   | 1.14  |
| 0.35 | 26.28  | 42.54   | 63.45   | 99.85   | 0.76 | 0.32 | 0.48 | 0.67   | 0.97  |
| 0.36 | 23.71  | 38.28   | 56.91   | 88.63   | 0.77 | 0.28 | 0.42 | 0.58   | 0.83  |
| 0.37 | 21.32  | 34.41   | 51.75   | 78.94   | 0.78 | 0.24 | 0.36 | 0.49   | 0.70  |
| 0.38 | 19.31  | 31.20   | 46.53   | 69.94   | 0.79 | 0.21 | 0.31 | 0.42   | 0.59  |
| 0.39 | 17.54  | 28.14   | 41.97   | 63.52   | 0.80 | 0.18 | 0.26 | 0.36   | 0.51  |
| 0.40 | 15.93  | 25.81   | 38.13   | 57.91   | 0.81 | 0.15 | 0.22 | 0.30   | 0.42  |
| 0.41 | 14.45  | 23.22   | 34.47   | 52.94   | 0.82 | 0.13 | 0.19 | 0.25   | 0.35  |
| 0.42 | 13.11  | 21.12   | 31.48   | 47.87   | 0.83 | 0.11 | 0.16 | 0.21   | 0.29  |
| 0.43 | 11.88  | 19.20   | 28.35   | 44.07   | 0.84 | 0.09 | 0.13 | 0.17   | 0.24  |
| 0.44 | 10.78  | 17.45   | 25.77   | 39.60   | 0.85 | 0.07 | 0.11 | 0.14   | 0.20  |
| 0.45 | 9.73   | 15.72   | 23.16   | 35.91   | 0.86 | 0.06 | 0.09 | 0.12   | 0.16  |
| 0.46 | 8.78   | 14.15   | 20.96   | 32.58   | 0.87 | 0.05 | 0.07 | 0.10   | 0.13  |
| 0.47 | 7.93   | 12.91   | 18.93   | 29.30   | 0.88 | 0.04 | 0.06 | 0.08   | 0.11  |
| 0.48 | 7.19   | 11.76   | 17.35   | 26.61   | 0.89 | 0.04 | 0.05 | 0.06   | 0.09  |
| 0.49 | 6.54   | 10.63   | 15.54   | 23.96   | 0.90 | 0.03 | 0.04 | 0.06   | 0.07  |
| 0.50 | 5.96   | 9.59    | 14.11   | 21.39   |      |      |      |        |       |

Table S272: Critical values for detector  $\hat{H}_{mov}^{m,0.2}$  with windows size  $n = 0.2$ , and FM-OLS and D-OLS estimation in a model with intercept. The number of integrated regressors is 4 and the highest power of  $x_{kt}$  is 1.

| m    | 90 %    | 95 %    | 97,5 %  | 99 %    | m    | 90 %  | 95 %  | 97,5 % | 99 %  |
|------|---------|---------|---------|---------|------|-------|-------|--------|-------|
| 0.10 | 1836.22 | 3087.66 | 4733.78 | 7644.36 | 0.51 | 10.71 | 17.77 | 26.85  | 43.13 |
| 0.11 | 1460.59 | 2451.82 | 3756.06 | 6160.67 | 0.52 | 9.73  | 16.00 | 24.67  | 38.83 |
| 0.12 | 1188.87 | 1988.96 | 3043.80 | 4919.74 | 0.53 | 8.83  | 14.55 | 22.22  | 35.20 |
| 0.13 | 971.25  | 1625.38 | 2541.98 | 4058.00 | 0.54 | 7.97  | 13.28 | 20.15  | 32.22 |
| 0.14 | 801.49  | 1336.06 | 2087.88 | 3478.31 | 0.55 | 7.24  | 12.01 | 18.13  | 28.76 |
| 0.15 | 664.08  | 1107.95 | 1763.50 | 2863.75 | 0.56 | 6.59  | 10.78 | 16.37  | 25.78 |
| 0.16 | 567.99  | 949.20  | 1489.54 | 2423.46 | 0.57 | 5.97  | 9.77  | 14.62  | 22.94 |
| 0.17 | 483.84  | 817.12  | 1255.96 | 2051.73 | 0.58 | 5.37  | 8.76  | 13.20  | 20.70 |
| 0.18 | 414.58  | 695.76  | 1078.33 | 1738.20 | 0.59 | 4.82  | 7.90  | 11.86  | 18.42 |
| 0.19 | 353.88  | 598.94  | 925.60  | 1507.35 | 0.60 | 4.34  | 7.11  | 10.62  | 16.68 |
| 0.20 | 310.62  | 524.12  | 802.50  | 1290.53 | 0.61 | 3.91  | 6.38  | 9.50   | 14.77 |
| 0.21 | 269.54  | 455.84  | 708.98  | 1145.35 | 0.62 | 3.51  | 5.74  | 8.42   | 13.29 |
| 0.22 | 235.26  | 397.22  | 612.30  | 1000.03 | 0.63 | 3.17  | 5.14  | 7.60   | 11.89 |
| 0.23 | 206.67  | 347.62  | 541.70  | 880.47  | 0.64 | 2.84  | 4.62  | 6.86   | 10.53 |
| 0.24 | 181.97  | 308.44  | 474.73  | 778.66  | 0.65 | 2.54  | 4.15  | 6.18   | 9.35  |
| 0.25 | 162.73  | 275.23  | 421.04  | 685.25  | 0.66 | 2.29  | 3.67  | 5.45   | 8.31  |
| 0.26 | 143.34  | 244.04  | 373.23  | 611.31  | 0.67 | 2.03  | 3.28  | 4.81   | 7.39  |
| 0.27 | 128.35  | 216.05  | 329.72  | 532.28  | 0.68 | 1.81  | 2.90  | 4.25   | 6.47  |
| 0.28 | 114.08  | 192.72  | 292.43  | 475.70  | 0.69 | 1.60  | 2.56  | 3.76   | 5.73  |
| 0.29 | 101.33  | 171.89  | 263.62  | 426.20  | 0.70 | 1.42  | 2.26  | 3.30   | 5.06  |
| 0.30 | 90.71   | 152.24  | 235.07  | 383.13  | 0.71 | 1.25  | 1.99  | 2.92   | 4.49  |
| 0.31 | 81.06   | 136.89  | 211.26  | 348.16  | 0.72 | 1.11  | 1.74  | 2.55   | 3.93  |
| 0.32 | 72.94   | 123.24  | 190.53  | 310.94  | 0.73 | 0.98  | 1.53  | 2.23   | 3.37  |
| 0.33 | 65.47   | 111.07  | 171.77  | 279.48  | 0.74 | 0.86  | 1.34  | 1.95   | 2.92  |
| 0.34 | 58.79   | 99.98   | 154.25  | 250.77  | 0.75 | 0.75  | 1.18  | 1.71   | 2.54  |
| 0.35 | 52.68   | 89.51   | 138.72  | 222.50  | 0.76 | 0.65  | 1.02  | 1.48   | 2.23  |
| 0.36 | 47.49   | 79.82   | 123.86  | 200.61  | 0.77 | 0.56  | 0.88  | 1.28   | 1.91  |
| 0.37 | 42.57   | 71.84   | 110.55  | 179.28  | 0.78 | 0.49  | 0.76  | 1.10   | 1.64  |
| 0.38 | 38.54   | 64.61   | 100.08  | 162.05  | 0.79 | 0.42  | 0.65  | 0.94   | 1.40  |
| 0.39 | 34.89   | 58.58   | 89.52   | 146.54  | 0.80 | 0.36  | 0.56  | 0.79   | 1.17  |
| 0.40 | 31.48   | 52.86   | 81.46   | 133.05  | 0.81 | 0.31  | 0.47  | 0.67   | 0.99  |
| 0.41 | 28.67   | 48.29   | 73.39   | 121.28  | 0.82 | 0.26  | 0.40  | 0.56   | 0.83  |
| 0.42 | 26.01   | 43.62   | 66.70   | 109.61  | 0.83 | 0.22  | 0.34  | 0.48   | 0.69  |
| 0.43 | 23.54   | 39.56   | 60.30   | 97.11   | 0.84 | 0.19  | 0.28  | 0.40   | 0.57  |
| 0.44 | 21.44   | 35.92   | 55.07   | 87.85   | 0.85 | 0.15  | 0.23  | 0.33   | 0.47  |
| 0.45 | 19.39   | 32.65   | 50.25   | 80.00   | 0.86 | 0.13  | 0.19  | 0.27   | 0.39  |
| 0.46 | 17.56   | 29.63   | 45.45   | 71.82   | 0.87 | 0.11  | 0.16  | 0.22   | 0.32  |
| 0.47 | 16.02   | 26.74   | 40.60   | 64.80   | 0.88 | 0.09  | 0.13  | 0.18   | 0.25  |
| 0.48 | 14.51   | 24.07   | 36.65   | 58.80   | 0.89 | 0.07  | 0.10  | 0.14   | 0.20  |
| 0.49 | 13.03   | 21.84   | 33.19   | 52.65   | 0.90 | 0.06  | 0.08  | 0.11   | 0.16  |
| 0.50 | 11.80   | 19.78   | 29.85   | 47.56   |      |       |       |        |       |

Table S273: Critical values for detector  $\hat{H}_{mov}^{m,0.2}$  with windows size  $n = 0.2$ , and IM-OLS estimation in a model with intercept. The number of integrated regressors is 4 and the highest power of  $x_{kt}$  is 1.

| m    | 90 %    | 95 %    | 97,5 %  | 99 %    | m    | 90 % | 95 % | 97,5 % | 99 %  |
|------|---------|---------|---------|---------|------|------|------|--------|-------|
| 0.10 | 1117.40 | 1825.03 | 2718.31 | 4192.77 | 0.51 | 6.13 | 9.81 | 14.38  | 21.73 |
| 0.11 | 894.70  | 1450.96 | 2157.71 | 3331.83 | 0.52 | 5.52 | 8.84 | 12.90  | 19.68 |
| 0.12 | 727.65  | 1179.03 | 1741.93 | 2721.59 | 0.53 | 4.99 | 7.91 | 11.54  | 17.75 |
| 0.13 | 593.05  | 967.18  | 1446.31 | 2220.46 | 0.54 | 4.45 | 7.09 | 10.42  | 15.83 |
| 0.14 | 489.92  | 794.68  | 1204.00 | 1868.39 | 0.55 | 4.03 | 6.39 | 9.32   | 14.04 |
| 0.15 | 412.01  | 673.93  | 1004.58 | 1568.13 | 0.56 | 3.64 | 5.75 | 8.34   | 12.57 |
| 0.16 | 347.87  | 571.92  | 847.44  | 1317.11 | 0.57 | 3.26 | 5.19 | 7.52   | 11.17 |
| 0.17 | 294.52  | 484.77  | 724.50  | 1109.79 | 0.58 | 2.90 | 4.61 | 6.69   | 9.97  |
| 0.18 | 251.84  | 413.71  | 618.61  | 948.96  | 0.59 | 2.62 | 4.14 | 5.98   | 8.96  |
| 0.19 | 216.52  | 350.70  | 532.25  | 830.40  | 0.60 | 2.37 | 3.73 | 5.37   | 7.93  |
| 0.20 | 188.12  | 305.99  | 454.53  | 709.37  | 0.61 | 2.12 | 3.34 | 4.78   | 7.08  |
| 0.21 | 165.35  | 268.49  | 395.23  | 607.95  | 0.62 | 1.89 | 2.98 | 4.28   | 6.32  |
| 0.22 | 144.83  | 233.71  | 347.17  | 533.51  | 0.63 | 1.69 | 2.63 | 3.79   | 5.65  |
| 0.23 | 126.61  | 205.51  | 308.64  | 471.03  | 0.64 | 1.51 | 2.34 | 3.35   | 4.98  |
| 0.24 | 111.29  | 182.65  | 270.21  | 418.29  | 0.65 | 1.33 | 2.07 | 2.95   | 4.38  |
| 0.25 | 98.12   | 160.78  | 240.16  | 374.61  | 0.66 | 1.18 | 1.84 | 2.62   | 3.87  |
| 0.26 | 86.87   | 141.69  | 214.48  | 334.02  | 0.67 | 1.05 | 1.61 | 2.30   | 3.39  |
| 0.27 | 77.43   | 126.36  | 188.99  | 292.82  | 0.68 | 0.93 | 1.42 | 2.02   | 3.01  |
| 0.28 | 68.93   | 113.30  | 166.45  | 259.10  | 0.69 | 0.82 | 1.26 | 1.78   | 2.64  |
| 0.29 | 60.66   | 100.26  | 150.25  | 231.60  | 0.70 | 0.73 | 1.12 | 1.57   | 2.30  |
| 0.30 | 53.49   | 88.74   | 131.25  | 204.46  | 0.71 | 0.64 | 0.97 | 1.37   | 2.01  |
| 0.31 | 48.37   | 78.84   | 118.04  | 182.50  | 0.72 | 0.55 | 0.85 | 1.19   | 1.75  |
| 0.32 | 43.40   | 70.92   | 105.42  | 163.72  | 0.73 | 0.49 | 0.74 | 1.04   | 1.52  |
| 0.33 | 39.01   | 63.70   | 93.46   | 146.54  | 0.74 | 0.43 | 0.64 | 0.90   | 1.33  |
| 0.34 | 34.80   | 56.84   | 84.32   | 133.39  | 0.75 | 0.38 | 0.56 | 0.78   | 1.15  |
| 0.35 | 31.26   | 50.61   | 75.45   | 118.61  | 0.76 | 0.33 | 0.49 | 0.68   | 0.98  |
| 0.36 | 28.00   | 45.35   | 67.59   | 104.91  | 0.77 | 0.28 | 0.42 | 0.58   | 0.83  |
| 0.37 | 25.19   | 40.73   | 61.32   | 93.29   | 0.78 | 0.24 | 0.36 | 0.49   | 0.70  |
| 0.38 | 22.76   | 36.72   | 54.73   | 82.86   | 0.79 | 0.21 | 0.31 | 0.42   | 0.59  |
| 0.39 | 20.59   | 33.12   | 49.35   | 74.72   | 0.80 | 0.18 | 0.26 | 0.36   | 0.51  |
| 0.40 | 18.71   | 30.20   | 44.63   | 67.58   | 0.81 | 0.16 | 0.22 | 0.30   | 0.42  |
| 0.41 | 16.96   | 27.13   | 40.21   | 61.22   | 0.82 | 0.13 | 0.19 | 0.26   | 0.35  |
| 0.42 | 15.23   | 24.68   | 36.63   | 55.26   | 0.83 | 0.11 | 0.16 | 0.21   | 0.30  |
| 0.43 | 13.78   | 22.21   | 32.84   | 51.02   | 0.84 | 0.10 | 0.14 | 0.18   | 0.25  |
| 0.44 | 12.48   | 20.17   | 29.78   | 45.70   | 0.85 | 0.08 | 0.12 | 0.15   | 0.21  |
| 0.45 | 11.21   | 18.16   | 26.69   | 41.23   | 0.86 | 0.07 | 0.10 | 0.13   | 0.17  |
| 0.46 | 10.13   | 16.34   | 24.07   | 37.05   | 0.87 | 0.06 | 0.09 | 0.11   | 0.14  |
| 0.47 | 9.10    | 14.79   | 21.63   | 33.24   | 0.88 | 0.06 | 0.07 | 0.09   | 0.12  |
| 0.48 | 8.21    | 13.44   | 19.76   | 30.22   | 0.89 | 0.05 | 0.06 | 0.08   | 0.11  |
| 0.49 | 7.46    | 12.10   | 17.64   | 27.06   | 0.90 | 0.04 | 0.06 | 0.07   | 0.10  |
| 0.50 | 6.76    | 10.85   | 15.94   | 24.13   |      |      |      |        |       |

Table S274: Critical values for detector  $\hat{H}_{mov}^{m,0.3}$  with windows size  $n = 0.3$ , and FM-OLS and D-OLS estimation in a model with intercept. The number of integrated regressors is 4 and the highest power of  $x_{kt}$  is 1.

| m    | 90 %    | 95 %    | 97,5 %  | 99 %    | m    | 90 %  | 95 %  | 97,5 % | 99 %  |
|------|---------|---------|---------|---------|------|-------|-------|--------|-------|
| 0.10 | 2240.18 | 3793.58 | 5828.58 | 9537.18 | 0.51 | 12.12 | 20.09 | 30.41  | 48.53 |
| 0.11 | 1790.38 | 3015.50 | 4623.37 | 7620.81 | 0.52 | 11.01 | 18.04 | 27.51  | 43.61 |
| 0.12 | 1451.98 | 2445.27 | 3768.64 | 6072.07 | 0.53 | 9.94  | 16.27 | 24.81  | 39.45 |
| 0.13 | 1190.19 | 2000.40 | 3135.90 | 5017.62 | 0.54 | 8.94  | 14.82 | 22.38  | 35.70 |
| 0.14 | 979.68  | 1643.69 | 2572.35 | 4308.82 | 0.55 | 8.08  | 13.29 | 20.03  | 31.95 |
| 0.15 | 811.89  | 1360.95 | 2178.31 | 3543.47 | 0.56 | 7.30  | 11.92 | 18.09  | 28.53 |
| 0.16 | 692.18  | 1165.46 | 1831.43 | 2995.15 | 0.57 | 6.58  | 10.75 | 16.08  | 25.01 |
| 0.17 | 589.54  | 1001.73 | 1547.47 | 2528.96 | 0.58 | 5.90  | 9.60  | 14.35  | 22.61 |
| 0.18 | 504.73  | 850.86  | 1325.40 | 2165.43 | 0.59 | 5.27  | 8.61  | 12.87  | 20.03 |
| 0.19 | 430.85  | 733.84  | 1137.48 | 1854.28 | 0.60 | 4.73  | 7.72  | 11.49  | 17.95 |
| 0.20 | 378.86  | 640.21  | 983.21  | 1598.12 | 0.61 | 4.25  | 6.90  | 10.18  | 15.87 |
| 0.21 | 328.34  | 557.90  | 865.49  | 1404.82 | 0.62 | 3.79  | 6.18  | 9.02   | 14.15 |
| 0.22 | 285.69  | 485.94  | 748.03  | 1214.85 | 0.63 | 3.40  | 5.50  | 8.09   | 12.60 |
| 0.23 | 250.11  | 426.05  | 659.82  | 1079.70 | 0.64 | 3.04  | 4.89  | 7.28   | 11.09 |
| 0.24 | 220.18  | 375.72  | 578.19  | 951.80  | 0.65 | 2.70  | 4.38  | 6.51   | 9.88  |
| 0.25 | 196.98  | 334.23  | 512.23  | 834.90  | 0.66 | 2.42  | 3.88  | 5.71   | 8.71  |
| 0.26 | 173.20  | 295.68  | 454.97  | 737.06  | 0.67 | 2.14  | 3.43  | 5.02   | 7.73  |
| 0.27 | 154.42  | 260.65  | 400.73  | 649.12  | 0.68 | 1.90  | 3.02  | 4.42   | 6.73  |
| 0.28 | 137.12  | 233.94  | 353.54  | 575.39  | 0.69 | 1.67  | 2.66  | 3.89   | 5.89  |
| 0.29 | 121.98  | 206.23  | 318.32  | 515.39  | 0.70 | 1.47  | 2.33  | 3.40   | 5.20  |
| 0.30 | 108.63  | 183.83  | 283.03  | 460.38  | 0.71 | 1.29  | 2.04  | 2.98   | 4.60  |
| 0.31 | 97.03   | 164.50  | 252.82  | 416.46  | 0.72 | 1.14  | 1.78  | 2.60   | 3.99  |
| 0.32 | 87.25   | 147.55  | 227.57  | 373.08  | 0.73 | 1.00  | 1.56  | 2.27   | 3.42  |
| 0.33 | 77.95   | 132.79  | 205.16  | 335.42  | 0.74 | 0.87  | 1.36  | 1.97   | 2.96  |
| 0.34 | 69.78   | 118.95  | 183.86  | 297.29  | 0.75 | 0.76  | 1.19  | 1.72   | 2.56  |
| 0.35 | 62.44   | 106.02  | 164.18  | 263.74  | 0.76 | 0.66  | 1.03  | 1.49   | 2.24  |
| 0.36 | 56.13   | 94.55   | 147.77  | 238.72  | 0.77 | 0.57  | 0.89  | 1.29   | 1.92  |
| 0.37 | 50.40   | 84.99   | 130.96  | 211.07  | 0.78 | 0.49  | 0.76  | 1.10   | 1.64  |
| 0.38 | 45.38   | 76.32   | 117.76  | 189.88  | 0.79 | 0.42  | 0.65  | 0.94   | 1.40  |
| 0.39 | 41.03   | 68.85   | 104.80  | 172.48  | 0.80 | 0.36  | 0.56  | 0.79   | 1.17  |
| 0.40 | 37.01   | 62.02   | 95.71   | 156.08  | 0.81 | 0.31  | 0.47  | 0.67   | 0.99  |
| 0.41 | 33.50   | 56.35   | 86.11   | 141.75  | 0.82 | 0.26  | 0.40  | 0.57   | 0.83  |
| 0.42 | 30.27   | 50.80   | 77.72   | 127.08  | 0.83 | 0.22  | 0.34  | 0.48   | 0.70  |
| 0.43 | 27.41   | 46.08   | 69.50   | 112.41  | 0.84 | 0.19  | 0.28  | 0.40   | 0.57  |
| 0.44 | 24.89   | 41.64   | 63.81   | 101.89  | 0.85 | 0.16  | 0.24  | 0.33   | 0.47  |
| 0.45 | 22.37   | 37.43   | 57.81   | 91.74   | 0.86 | 0.13  | 0.20  | 0.27   | 0.39  |
| 0.46 | 20.21   | 33.99   | 51.97   | 82.65   | 0.87 | 0.11  | 0.16  | 0.22   | 0.32  |
| 0.47 | 18.37   | 30.70   | 46.54   | 74.09   | 0.88 | 0.09  | 0.13  | 0.18   | 0.25  |
| 0.48 | 16.59   | 27.45   | 41.86   | 67.00   | 0.89 | 0.07  | 0.10  | 0.14   | 0.20  |
| 0.49 | 14.86   | 24.88   | 37.91   | 59.85   | 0.90 | 0.06  | 0.08  | 0.11   | 0.16  |
| 0.50 | 13.40   | 22.34   | 33.84   | 53.59   |      |       |       |        |       |

Table S275: Critical values for detector  $\hat{H}_{mov}^{m,0.3}$  with windows size  $n = 0.3$ , and IM-OLS estimation in a model with intercept. The number of integrated regressors is 4 and the highest power of  $x_{kt}$  is 1.

| m    | 90 %    | 95 %     | 97,5 %   | 99 %     | m    | 90 % | 95 %  | 97,5 % | 99 %  |
|------|---------|----------|----------|----------|------|------|-------|--------|-------|
| 0.10 | 8432.55 | 13192.92 | 18871.18 | 28370.84 | 0.51 | 9.11 | 14.28 | 20.67  | 30.79 |
| 0.11 | 6025.71 | 9365.09  | 13472.26 | 20455.17 | 0.52 | 8.15 | 12.71 | 18.42  | 27.67 |
| 0.12 | 4330.56 | 6719.88  | 9638.24  | 14395.79 | 0.53 | 7.24 | 11.29 | 16.45  | 24.58 |
| 0.13 | 3219.57 | 4974.15  | 7178.13  | 10782.13 | 0.54 | 6.50 | 10.16 | 14.70  | 21.47 |
| 0.14 | 2466.20 | 3818.28  | 5452.59  | 8047.33  | 0.55 | 5.76 | 8.96  | 12.93  | 19.51 |
| 0.15 | 1918.47 | 2983.19  | 4307.76  | 6501.55  | 0.56 | 5.14 | 8.10  | 11.62  | 17.33 |
| 0.16 | 1506.06 | 2343.19  | 3374.02  | 5045.57  | 0.57 | 4.63 | 7.16  | 10.38  | 15.15 |
| 0.17 | 1202.11 | 1861.26  | 2668.08  | 3968.27  | 0.58 | 4.08 | 6.36  | 9.13   | 13.50 |
| 0.18 | 958.53  | 1501.85  | 2169.52  | 3243.67  | 0.59 | 3.63 | 5.64  | 8.18   | 12.09 |
| 0.19 | 776.97  | 1215.92  | 1757.04  | 2610.10  | 0.60 | 3.25 | 5.05  | 7.20   | 10.58 |
| 0.20 | 637.94  | 992.82   | 1424.62  | 2163.10  | 0.61 | 2.90 | 4.47  | 6.41   | 9.49  |
| 0.21 | 526.40  | 821.24   | 1203.04  | 1786.93  | 0.62 | 2.58 | 3.97  | 5.70   | 8.45  |
| 0.22 | 435.69  | 680.59   | 986.51   | 1486.84  | 0.63 | 2.27 | 3.54  | 5.07   | 7.42  |
| 0.23 | 367.81  | 575.52   | 829.16   | 1243.40  | 0.64 | 2.01 | 3.13  | 4.49   | 6.65  |
| 0.24 | 308.88  | 483.14   | 694.72   | 1031.24  | 0.65 | 1.79 | 2.78  | 3.96   | 5.80  |
| 0.25 | 262.47  | 413.70   | 593.18   | 875.94   | 0.66 | 1.57 | 2.44  | 3.51   | 5.15  |
| 0.26 | 222.69  | 347.48   | 501.43   | 731.05   | 0.67 | 1.39 | 2.15  | 3.06   | 4.54  |
| 0.27 | 189.92  | 295.64   | 427.74   | 632.10   | 0.68 | 1.23 | 1.91  | 2.71   | 3.94  |
| 0.28 | 163.50  | 255.66   | 367.60   | 553.99   | 0.69 | 1.08 | 1.67  | 2.39   | 3.47  |
| 0.29 | 140.29  | 220.39   | 321.51   | 479.33   | 0.70 | 0.95 | 1.46  | 2.08   | 3.06  |
| 0.30 | 121.97  | 190.12   | 275.91   | 415.05   | 0.71 | 0.83 | 1.28  | 1.81   | 2.64  |
| 0.31 | 106.32  | 165.40   | 239.67   | 359.26   | 0.72 | 0.73 | 1.12  | 1.58   | 2.30  |
| 0.32 | 92.36   | 143.52   | 210.23   | 316.00   | 0.73 | 0.64 | 0.97  | 1.37   | 2.04  |
| 0.33 | 80.20   | 126.17   | 182.95   | 274.24   | 0.74 | 0.56 | 0.85  | 1.19   | 1.73  |
| 0.34 | 70.58   | 110.47   | 159.04   | 242.89   | 0.75 | 0.49 | 0.73  | 1.03   | 1.49  |
| 0.35 | 61.23   | 96.87    | 139.73   | 212.07   | 0.76 | 0.42 | 0.64  | 0.90   | 1.26  |
| 0.36 | 54.07   | 84.78    | 121.93   | 181.21   | 0.77 | 0.36 | 0.55  | 0.76   | 1.08  |
| 0.37 | 47.57   | 75.41    | 107.94   | 157.65   | 0.78 | 0.31 | 0.47  | 0.65   | 0.92  |
| 0.38 | 41.83   | 65.95    | 95.92    | 140.51   | 0.79 | 0.27 | 0.40  | 0.56   | 0.78  |
| 0.39 | 37.15   | 58.43    | 84.39    | 124.79   | 0.80 | 0.23 | 0.34  | 0.46   | 0.65  |
| 0.40 | 33.08   | 51.92    | 74.88    | 111.09   | 0.81 | 0.19 | 0.29  | 0.39   | 0.55  |
| 0.41 | 29.28   | 45.98    | 66.42    | 99.21    | 0.82 | 0.16 | 0.24  | 0.33   | 0.46  |
| 0.42 | 25.98   | 40.68    | 58.71    | 87.86    | 0.83 | 0.14 | 0.20  | 0.28   | 0.39  |
| 0.43 | 23.11   | 36.04    | 51.78    | 77.75    | 0.84 | 0.11 | 0.17  | 0.23   | 0.31  |
| 0.44 | 20.50   | 31.98    | 46.41    | 68.64    | 0.85 | 0.09 | 0.14  | 0.18   | 0.26  |
| 0.45 | 18.23   | 28.71    | 41.38    | 62.49    | 0.86 | 0.08 | 0.11  | 0.15   | 0.21  |
| 0.46 | 16.24   | 25.27    | 36.62    | 55.22    | 0.87 | 0.06 | 0.09  | 0.12   | 0.16  |
| 0.47 | 14.39   | 22.58    | 32.89    | 49.12    | 0.88 | 0.05 | 0.07  | 0.09   | 0.13  |
| 0.48 | 12.89   | 20.21    | 29.23    | 43.61    | 0.89 | 0.04 | 0.05  | 0.07   | 0.10  |
| 0.49 | 11.45   | 18.05    | 25.88    | 38.98    | 0.90 | 0.03 | 0.04  | 0.05   | 0.07  |
| 0.50 | 10.23   | 15.92    | 22.99    | 34.79    |      |      |       |        |       |

Table S276: Critical values for detector  $\hat{H}_{mov}^{m,0.1}$  with windows size  $n = 0.1$ , and FM-OLS and D-OLS estimation in a model with intercept and linear trend. The number of integrated regressors is 4 and the highest power of  $x_{kt}$  is 1.

| m    | 90 %     | 95 %     | 97,5 %   | 99 %     | m    | 90 %  | 95 %  | 97,5 % | 99 %  |
|------|----------|----------|----------|----------|------|-------|-------|--------|-------|
| 0.10 | 16650.53 | 27028.93 | 39720.87 | 61086.32 | 0.51 | 18.08 | 29.38 | 43.77  | 69.78 |
| 0.11 | 11857.20 | 18960.90 | 28171.40 | 43941.59 | 0.52 | 16.11 | 26.18 | 39.01  | 61.50 |
| 0.12 | 8584.43  | 13863.92 | 20297.65 | 30950.96 | 0.53 | 14.39 | 23.31 | 34.63  | 54.34 |
| 0.13 | 6382.68  | 10299.81 | 15185.88 | 23404.03 | 0.54 | 12.81 | 20.84 | 31.23  | 48.33 |
| 0.14 | 4863.93  | 7751.38  | 11463.93 | 17790.30 | 0.55 | 11.48 | 18.52 | 27.72  | 43.54 |
| 0.15 | 3734.53  | 6056.63  | 8848.66  | 13653.37 | 0.56 | 10.23 | 16.53 | 24.74  | 38.78 |
| 0.16 | 2952.09  | 4780.62  | 7079.47  | 10732.48 | 0.57 | 9.12  | 14.78 | 21.95  | 34.36 |
| 0.17 | 2366.20  | 3798.98  | 5635.98  | 8665.97  | 0.58 | 8.09  | 13.14 | 19.47  | 30.13 |
| 0.18 | 1880.91  | 3039.91  | 4482.06  | 6956.26  | 0.59 | 7.22  | 11.60 | 17.25  | 26.47 |
| 0.19 | 1533.75  | 2462.91  | 3676.51  | 5745.02  | 0.60 | 6.41  | 10.38 | 15.31  | 23.17 |
| 0.20 | 1253.14  | 2033.94  | 2961.50  | 4690.37  | 0.61 | 5.72  | 9.20  | 13.41  | 20.46 |
| 0.21 | 1033.93  | 1689.37  | 2505.37  | 3829.22  | 0.62 | 5.12  | 8.12  | 11.89  | 18.15 |
| 0.22 | 864.99   | 1406.82  | 2106.14  | 3272.27  | 0.63 | 4.55  | 7.26  | 10.52  | 16.12 |
| 0.23 | 727.62   | 1179.08  | 1767.36  | 2770.84  | 0.64 | 4.05  | 6.41  | 9.30   | 14.26 |
| 0.24 | 616.70   | 997.38   | 1490.99  | 2337.65  | 0.65 | 3.57  | 5.66  | 8.24   | 12.65 |
| 0.25 | 523.86   | 846.99   | 1255.75  | 1968.94  | 0.66 | 3.14  | 4.99  | 7.32   | 11.10 |
| 0.26 | 442.50   | 712.81   | 1069.40  | 1651.11  | 0.67 | 2.78  | 4.43  | 6.48   | 9.76  |
| 0.27 | 377.35   | 614.04   | 916.41   | 1438.62  | 0.68 | 2.44  | 3.90  | 5.72   | 8.62  |
| 0.28 | 325.88   | 522.41   | 789.06   | 1243.90  | 0.69 | 2.16  | 3.45  | 5.05   | 7.56  |
| 0.29 | 281.28   | 455.69   | 686.44   | 1060.64  | 0.70 | 1.90  | 3.04  | 4.45   | 6.63  |
| 0.30 | 244.33   | 396.55   | 592.61   | 927.19   | 0.71 | 1.67  | 2.65  | 3.87   | 5.85  |
| 0.31 | 211.52   | 342.64   | 515.61   | 808.63   | 0.72 | 1.47  | 2.31  | 3.37   | 5.07  |
| 0.32 | 183.52   | 300.11   | 445.41   | 687.09   | 0.73 | 1.28  | 2.02  | 2.92   | 4.43  |
| 0.33 | 159.74   | 261.06   | 387.10   | 598.39   | 0.74 | 1.11  | 1.76  | 2.56   | 3.84  |
| 0.34 | 140.56   | 227.22   | 343.90   | 528.57   | 0.75 | 0.97  | 1.53  | 2.21   | 3.34  |
| 0.35 | 121.91   | 199.95   | 300.82   | 465.07   | 0.76 | 0.84  | 1.33  | 1.91   | 2.88  |
| 0.36 | 107.24   | 175.26   | 261.65   | 408.43   | 0.77 | 0.73  | 1.14  | 1.65   | 2.44  |
| 0.37 | 93.99    | 153.71   | 231.99   | 362.09   | 0.78 | 0.63  | 0.97  | 1.40   | 2.09  |
| 0.38 | 83.22    | 135.60   | 204.09   | 321.22   | 0.79 | 0.54  | 0.83  | 1.19   | 1.80  |
| 0.39 | 73.88    | 120.13   | 179.83   | 282.26   | 0.80 | 0.46  | 0.71  | 1.00   | 1.51  |
| 0.40 | 65.78    | 106.57   | 159.32   | 249.79   | 0.81 | 0.39  | 0.60  | 0.85   | 1.26  |
| 0.41 | 58.52    | 94.94    | 142.34   | 219.51   | 0.82 | 0.33  | 0.50  | 0.71   | 1.05  |
| 0.42 | 51.81    | 84.15    | 126.02   | 196.19   | 0.83 | 0.28  | 0.42  | 0.60   | 0.87  |
| 0.43 | 46.04    | 74.52    | 111.06   | 176.96   | 0.84 | 0.23  | 0.35  | 0.50   | 0.73  |
| 0.44 | 40.83    | 66.02    | 99.24    | 155.54   | 0.85 | 0.19  | 0.29  | 0.41   | 0.59  |
| 0.45 | 36.31    | 58.87    | 88.25    | 139.80   | 0.86 | 0.16  | 0.24  | 0.33   | 0.48  |
| 0.46 | 32.15    | 52.68    | 78.97    | 124.87   | 0.87 | 0.13  | 0.19  | 0.27   | 0.38  |
| 0.47 | 28.82    | 46.76    | 69.94    | 111.65   | 0.88 | 0.10  | 0.15  | 0.21   | 0.30  |
| 0.48 | 25.77    | 41.38    | 62.88    | 99.11    | 0.89 | 0.08  | 0.12  | 0.17   | 0.24  |
| 0.49 | 22.85    | 37.14    | 55.51    | 87.91    | 0.90 | 0.06  | 0.09  | 0.13   | 0.18  |
| 0.50 | 20.37    | 33.06    | 49.46    | 77.77    |      |       |       |        |       |

Table S277: Critical values for detector  $\hat{H}_{mov}^{m,0.1}$  with windows size  $n = 0.1$ , and IM-OLS estimation in a model with intercept and linear trend. The number of integrated regressors is 4 and the highest power of  $x_{kt}$  is 1.

| m    | 90 %     | 95 %     | 97,5 %   | 99 %     | m    | 90 %  | 95 %  | 97,5 % | 99 %  |
|------|----------|----------|----------|----------|------|-------|-------|--------|-------|
| 0.10 | 11725.04 | 18478.55 | 26490.83 | 40001.70 | 0.51 | 13.12 | 20.53 | 29.73  | 44.22 |
| 0.11 | 8473.27  | 13279.77 | 19216.24 | 28941.07 | 0.52 | 11.64 | 18.29 | 26.39  | 39.61 |
| 0.12 | 6151.64  | 9598.75  | 13843.77 | 20881.82 | 0.53 | 10.33 | 16.13 | 23.38  | 35.07 |
| 0.13 | 4612.44  | 7227.06  | 10465.62 | 15772.97 | 0.54 | 9.22  | 14.44 | 20.89  | 30.44 |
| 0.14 | 3557.21  | 5558.50  | 7998.35  | 11871.29 | 0.55 | 8.13  | 12.72 | 18.29  | 27.49 |
| 0.15 | 2792.45  | 4384.39  | 6371.88  | 9584.15  | 0.56 | 7.26  | 11.29 | 16.35  | 24.22 |
| 0.16 | 2202.31  | 3476.78  | 5037.89  | 7541.23  | 0.57 | 6.46  | 9.98  | 14.42  | 21.23 |
| 0.17 | 1765.85  | 2774.62  | 3996.64  | 6029.69  | 0.58 | 5.67  | 8.87  | 12.57  | 18.64 |
| 0.18 | 1421.49  | 2242.72  | 3275.77  | 4901.35  | 0.59 | 5.04  | 7.78  | 11.24  | 16.60 |
| 0.19 | 1156.27  | 1827.60  | 2651.02  | 3980.53  | 0.60 | 4.46  | 6.95  | 9.85   | 14.46 |
| 0.20 | 951.92   | 1497.83  | 2161.33  | 3300.32  | 0.61 | 3.96  | 6.12  | 8.73   | 12.82 |
| 0.21 | 788.22   | 1244.93  | 1826.43  | 2724.70  | 0.62 | 3.50  | 5.38  | 7.66   | 11.43 |
| 0.22 | 651.92   | 1032.67  | 1508.40  | 2267.41  | 0.63 | 3.06  | 4.76  | 6.80   | 10.01 |
| 0.23 | 551.85   | 872.75   | 1267.76  | 1912.65  | 0.64 | 2.69  | 4.18  | 5.99   | 8.83  |
| 0.24 | 463.79   | 736.03   | 1057.70  | 1589.31  | 0.65 | 2.37  | 3.68  | 5.24   | 7.66  |
| 0.25 | 396.68   | 628.40   | 905.36   | 1346.29  | 0.66 | 2.07  | 3.20  | 4.58   | 6.75  |
| 0.26 | 336.11   | 528.27   | 764.55   | 1117.79  | 0.67 | 1.82  | 2.79  | 3.98   | 5.82  |
| 0.27 | 286.98   | 449.22   | 654.96   | 972.23   | 0.68 | 1.58  | 2.46  | 3.48   | 5.02  |
| 0.28 | 246.43   | 388.51   | 563.01   | 852.82   | 0.69 | 1.39  | 2.12  | 3.03   | 4.40  |
| 0.29 | 212.14   | 334.70   | 490.09   | 740.02   | 0.70 | 1.21  | 1.85  | 2.62   | 3.82  |
| 0.30 | 184.04   | 288.64   | 422.36   | 635.91   | 0.71 | 1.05  | 1.60  | 2.26   | 3.27  |
| 0.31 | 160.37   | 250.81   | 365.78   | 550.16   | 0.72 | 0.90  | 1.38  | 1.95   | 2.85  |
| 0.32 | 139.29   | 218.29   | 319.97   | 481.41   | 0.73 | 0.79  | 1.18  | 1.67   | 2.48  |
| 0.33 | 120.86   | 190.53   | 278.99   | 418.17   | 0.74 | 0.68  | 1.02  | 1.44   | 2.10  |
| 0.34 | 106.49   | 167.30   | 241.50   | 369.96   | 0.75 | 0.58  | 0.88  | 1.22   | 1.76  |
| 0.35 | 92.00    | 146.30   | 212.13   | 320.54   | 0.76 | 0.50  | 0.75  | 1.05   | 1.48  |
| 0.36 | 81.10    | 128.01   | 184.61   | 274.46   | 0.77 | 0.43  | 0.64  | 0.88   | 1.25  |
| 0.37 | 71.25    | 113.39   | 162.99   | 240.09   | 0.78 | 0.36  | 0.53  | 0.74   | 1.05  |
| 0.38 | 62.52    | 99.45    | 144.74   | 213.29   | 0.79 | 0.31  | 0.45  | 0.63   | 0.88  |
| 0.39 | 55.40    | 87.74    | 127.33   | 187.70   | 0.80 | 0.26  | 0.38  | 0.51   | 0.72  |
| 0.40 | 49.31    | 77.54    | 111.65   | 167.67   | 0.81 | 0.21  | 0.31  | 0.43   | 0.61  |
| 0.41 | 43.50    | 68.59    | 99.82    | 148.20   | 0.82 | 0.18  | 0.26  | 0.36   | 0.50  |
| 0.42 | 38.48    | 60.43    | 87.54    | 130.87   | 0.83 | 0.15  | 0.22  | 0.29   | 0.41  |
| 0.43 | 34.16    | 53.45    | 77.00    | 115.53   | 0.84 | 0.12  | 0.18  | 0.24   | 0.33  |
| 0.44 | 30.18    | 47.34    | 68.52    | 102.39   | 0.85 | 0.10  | 0.14  | 0.19   | 0.27  |
| 0.45 | 26.81    | 42.29    | 61.00    | 92.21    | 0.86 | 0.08  | 0.11  | 0.15   | 0.21  |
| 0.46 | 23.77    | 37.10    | 53.77    | 81.14    | 0.87 | 0.06  | 0.09  | 0.12   | 0.17  |
| 0.47 | 21.03    | 33.02    | 48.19    | 72.49    | 0.88 | 0.05  | 0.07  | 0.10   | 0.13  |
| 0.48 | 18.76    | 29.40    | 42.75    | 63.94    | 0.89 | 0.04  | 0.06  | 0.08   | 0.10  |
| 0.49 | 16.66    | 26.18    | 37.71    | 56.60    | 0.90 | 0.03  | 0.05  | 0.06   | 0.08  |
| 0.50 | 14.84    | 23.07    | 33.40    | 50.07    |      |       |       |        |       |

Table S278: Critical values for detector  $\hat{H}_{mov}^{m,0.2}$  with windows size  $n = 0.2$ , and FM-OLS and D-OLS estimation in a model with intercept and linear trend. The number of integrated regressors is 4 and the highest power of  $x_{kt}$  is 1.

| m    | 90 %     | 95 %     | 97,5 %   | 99 %     | m    | 90 %  | 95 %  | 97,5 % | 99 %   |
|------|----------|----------|----------|----------|------|-------|-------|--------|--------|
| 0.10 | 23006.84 | 37803.00 | 55354.24 | 85749.63 | 0.51 | 26.03 | 42.18 | 63.19  | 100.03 |
| 0.11 | 16506.73 | 26877.34 | 40029.18 | 62461.93 | 0.52 | 23.08 | 37.57 | 55.77  | 87.97  |
| 0.12 | 12144.47 | 19649.11 | 28950.90 | 44876.25 | 0.53 | 20.49 | 33.24 | 49.86  | 77.30  |
| 0.13 | 9101.70  | 14834.78 | 21899.54 | 34110.75 | 0.54 | 18.19 | 29.56 | 44.35  | 68.70  |
| 0.14 | 6991.76  | 11327.22 | 16717.70 | 25914.60 | 0.55 | 16.19 | 26.20 | 39.15  | 61.45  |
| 0.15 | 5444.58  | 8917.93  | 13065.51 | 20126.72 | 0.56 | 14.39 | 23.23 | 34.58  | 54.57  |
| 0.16 | 4329.06  | 7058.60  | 10600.83 | 16051.34 | 0.57 | 12.79 | 20.69 | 30.62  | 47.97  |
| 0.17 | 3486.08  | 5625.85  | 8412.45  | 12949.17 | 0.58 | 11.26 | 18.30 | 26.96  | 42.09  |
| 0.18 | 2765.32  | 4537.47  | 6711.27  | 10525.84 | 0.59 | 9.95  | 16.06 | 23.77  | 36.33  |
| 0.19 | 2269.06  | 3678.73  | 5556.08  | 8641.23  | 0.60 | 8.84  | 14.28 | 20.97  | 31.81  |
| 0.20 | 1860.94  | 3059.12  | 4488.86  | 7132.84  | 0.61 | 7.81  | 12.55 | 18.24  | 27.86  |
| 0.21 | 1543.29  | 2541.49  | 3811.45  | 5830.96  | 0.62 | 6.92  | 11.04 | 16.16  | 24.59  |
| 0.22 | 1296.74  | 2122.86  | 3200.40  | 5006.95  | 0.63 | 6.13  | 9.74  | 14.16  | 21.66  |
| 0.23 | 1092.43  | 1782.94  | 2685.54  | 4232.57  | 0.64 | 5.42  | 8.53  | 12.45  | 18.94  |
| 0.24 | 924.04   | 1513.69  | 2272.06  | 3570.29  | 0.65 | 4.74  | 7.51  | 10.96  | 16.66  |
| 0.25 | 790.23   | 1286.58  | 1921.46  | 3001.62  | 0.66 | 4.16  | 6.55  | 9.58   | 14.59  |
| 0.26 | 662.22   | 1083.48  | 1637.46  | 2527.27  | 0.67 | 3.64  | 5.76  | 8.39   | 12.64  |
| 0.27 | 568.83   | 933.37   | 1393.78  | 2201.43  | 0.68 | 3.17  | 5.03  | 7.39   | 11.17  |
| 0.28 | 491.75   | 795.77   | 1205.75  | 1900.27  | 0.69 | 2.78  | 4.42  | 6.43   | 9.65   |
| 0.29 | 424.51   | 691.76   | 1042.10  | 1629.78  | 0.70 | 2.43  | 3.86  | 5.63   | 8.37   |
| 0.30 | 368.15   | 601.16   | 900.83   | 1421.79  | 0.71 | 2.11  | 3.34  | 4.84   | 7.27   |
| 0.31 | 318.45   | 519.33   | 781.74   | 1233.39  | 0.72 | 1.83  | 2.88  | 4.19   | 6.23   |
| 0.32 | 276.90   | 454.78   | 676.67   | 1048.63  | 0.73 | 1.59  | 2.49  | 3.58   | 5.42   |
| 0.33 | 240.84   | 395.61   | 589.40   | 912.04   | 0.74 | 1.37  | 2.14  | 3.09   | 4.66   |
| 0.34 | 210.93   | 343.19   | 521.24   | 800.21   | 0.75 | 1.18  | 1.85  | 2.64   | 4.00   |
| 0.35 | 183.17   | 302.10   | 455.86   | 703.92   | 0.76 | 1.01  | 1.58  | 2.26   | 3.35   |
| 0.36 | 161.06   | 264.97   | 396.67   | 615.75   | 0.77 | 0.86  | 1.34  | 1.93   | 2.84   |
| 0.37 | 140.73   | 231.23   | 350.32   | 547.98   | 0.78 | 0.73  | 1.13  | 1.61   | 2.40   |
| 0.38 | 124.27   | 204.04   | 308.64   | 485.19   | 0.79 | 0.62  | 0.95  | 1.35   | 2.02   |
| 0.39 | 110.09   | 179.84   | 270.43   | 422.42   | 0.80 | 0.53  | 0.80  | 1.12   | 1.69   |
| 0.40 | 97.87    | 159.22   | 238.83   | 375.19   | 0.81 | 0.44  | 0.66  | 0.94   | 1.39   |
| 0.41 | 86.73    | 141.68   | 212.80   | 329.67   | 0.82 | 0.37  | 0.55  | 0.78   | 1.13   |
| 0.42 | 76.80    | 124.81   | 187.85   | 292.65   | 0.83 | 0.30  | 0.46  | 0.64   | 0.93   |
| 0.43 | 68.06    | 110.44   | 164.01   | 263.74   | 0.84 | 0.25  | 0.37  | 0.53   | 0.77   |
| 0.44 | 60.12    | 97.57    | 147.16   | 231.31   | 0.85 | 0.20  | 0.31  | 0.43   | 0.61   |
| 0.45 | 53.34    | 86.79    | 130.70   | 205.72   | 0.86 | 0.17  | 0.25  | 0.34   | 0.49   |
| 0.46 | 47.05    | 77.25    | 116.24   | 183.59   | 0.87 | 0.13  | 0.20  | 0.27   | 0.39   |
| 0.47 | 41.98    | 68.31    | 102.88   | 164.46   | 0.88 | 0.11  | 0.16  | 0.22   | 0.31   |
| 0.48 | 37.53    | 60.37    | 91.69    | 144.10   | 0.89 | 0.08  | 0.12  | 0.17   | 0.24   |
| 0.49 | 33.12    | 53.95    | 80.60    | 126.89   | 0.90 | 0.07  | 0.10  | 0.13   | 0.18   |
| 0.50 | 29.43    | 47.95    | 71.28    | 113.30   |      |       |       |        |        |

Table S279: Critical values for detector  $\hat{H}_{mov}^{m,0.2}$  with windows size  $n = 0.2$ , and IM-OLS estimation in a model with intercept and linear trend. The number of integrated regressors is 4 and the highest power of  $x_{kt}$  is 1.



| m    | 90 %     | 95 %     | 97,5 %   | 99 %     | m    | 90 %  | 95 %  | 97,5 % | 99 %  |
|------|----------|----------|----------|----------|------|-------|-------|--------|-------|
| 0.10 | 13316.22 | 21141.79 | 30390.84 | 46111.60 | 0.51 | 14.48 | 22.66 | 32.74  | 49.00 |
| 0.11 | 9675.23  | 15239.04 | 22249.61 | 33430.18 | 0.52 | 12.85 | 20.13 | 29.02  | 43.60 |
| 0.12 | 7073.52  | 11075.15 | 16036.76 | 24312.23 | 0.53 | 11.35 | 17.77 | 25.60  | 38.56 |
| 0.13 | 5305.15  | 8372.69  | 12166.85 | 18380.48 | 0.54 | 10.09 | 15.77 | 22.72  | 33.08 |
| 0.14 | 4106.83  | 6450.14  | 9350.03  | 13936.67 | 0.55 | 8.89  | 13.82 | 19.88  | 29.77 |
| 0.15 | 3231.80  | 5100.75  | 7433.58  | 11268.86 | 0.56 | 7.88  | 12.24 | 17.68  | 26.31 |
| 0.16 | 2553.35  | 4060.96  | 5898.78  | 8868.27  | 0.57 | 6.98  | 10.76 | 15.56  | 22.89 |
| 0.17 | 2047.83  | 3243.33  | 4700.88  | 7121.34  | 0.58 | 6.12  | 9.54  | 13.52  | 20.03 |
| 0.18 | 1655.17  | 2628.47  | 3847.25  | 5779.40  | 0.59 | 5.40  | 8.36  | 12.05  | 17.69 |
| 0.19 | 1349.12  | 2140.77  | 3124.65  | 4685.27  | 0.60 | 4.78  | 7.42  | 10.49  | 15.35 |
| 0.20 | 1107.00  | 1756.97  | 2547.59  | 3897.16  | 0.61 | 4.20  | 6.51  | 9.26   | 13.57 |
| 0.21 | 918.93   | 1462.18  | 2146.26  | 3216.72  | 0.62 | 3.72  | 5.71  | 8.09   | 12.09 |
| 0.22 | 759.74   | 1211.69  | 1772.90  | 2675.70  | 0.63 | 3.23  | 5.01  | 7.14   | 10.45 |
| 0.23 | 642.90   | 1022.79  | 1494.36  | 2259.20  | 0.64 | 2.82  | 4.39  | 6.28   | 9.21  |
| 0.24 | 541.90   | 861.17   | 1243.18  | 1868.01  | 0.65 | 2.47  | 3.83  | 5.44   | 7.93  |
| 0.25 | 462.66   | 736.44   | 1066.84  | 1585.55  | 0.66 | 2.16  | 3.33  | 4.75   | 6.99  |
| 0.26 | 391.49   | 618.88   | 896.91   | 1322.87  | 0.67 | 1.88  | 2.88  | 4.11   | 6.01  |
| 0.27 | 334.39   | 527.06   | 768.00   | 1144.34  | 0.68 | 1.63  | 2.53  | 3.57   | 5.16  |
| 0.28 | 286.48   | 453.69   | 658.81   | 1001.07  | 0.69 | 1.43  | 2.18  | 3.09   | 4.50  |
| 0.29 | 246.39   | 390.01   | 573.94   | 866.56   | 0.70 | 1.24  | 1.89  | 2.67   | 3.88  |
| 0.30 | 213.38   | 336.11   | 493.93   | 742.07   | 0.71 | 1.07  | 1.63  | 2.30   | 3.32  |
| 0.31 | 185.99   | 291.47   | 427.26   | 641.12   | 0.72 | 0.92  | 1.40  | 1.97   | 2.88  |
| 0.32 | 161.39   | 253.61   | 372.90   | 560.65   | 0.73 | 0.80  | 1.20  | 1.68   | 2.50  |
| 0.33 | 139.80   | 221.00   | 323.11   | 488.80   | 0.74 | 0.69  | 1.03  | 1.45   | 2.11  |
| 0.34 | 122.97   | 193.66   | 279.86   | 430.37   | 0.75 | 0.59  | 0.88  | 1.23   | 1.77  |
| 0.35 | 106.31   | 168.81   | 243.84   | 371.08   | 0.76 | 0.51  | 0.76  | 1.06   | 1.49  |
| 0.36 | 93.39    | 147.53   | 212.95   | 316.74   | 0.77 | 0.43  | 0.64  | 0.89   | 1.25  |
| 0.37 | 81.76    | 130.73   | 187.65   | 277.57   | 0.78 | 0.36  | 0.54  | 0.74   | 1.05  |
| 0.38 | 71.62    | 113.99   | 166.05   | 244.79   | 0.79 | 0.31  | 0.46  | 0.63   | 0.88  |
| 0.39 | 63.42    | 100.45   | 145.91   | 215.68   | 0.80 | 0.26  | 0.38  | 0.52   | 0.73  |
| 0.40 | 56.20    | 88.57    | 127.76   | 191.10   | 0.81 | 0.22  | 0.32  | 0.43   | 0.61  |
| 0.41 | 49.55    | 78.17    | 113.68   | 168.98   | 0.82 | 0.18  | 0.26  | 0.36   | 0.50  |
| 0.42 | 43.72    | 68.68    | 99.66    | 149.04   | 0.83 | 0.15  | 0.22  | 0.29   | 0.41  |
| 0.43 | 38.65    | 60.68    | 87.27    | 131.02   | 0.84 | 0.13  | 0.18  | 0.24   | 0.33  |
| 0.44 | 34.11    | 53.54    | 77.35    | 115.76   | 0.85 | 0.10  | 0.15  | 0.19   | 0.27  |
| 0.45 | 30.22    | 47.55    | 68.59    | 103.77   | 0.86 | 0.08  | 0.12  | 0.16   | 0.21  |
| 0.46 | 26.71    | 41.64    | 60.47    | 91.44    | 0.87 | 0.07  | 0.10  | 0.13   | 0.17  |
| 0.47 | 23.55    | 37.03    | 53.89    | 81.24    | 0.88 | 0.06  | 0.08  | 0.10   | 0.13  |
| 0.48 | 20.98    | 32.85    | 47.77    | 71.08    | 0.89 | 0.05  | 0.06  | 0.08   | 0.11  |
| 0.49 | 18.58    | 29.15    | 42.10    | 62.90    | 0.90 | 0.04  | 0.05  | 0.07   | 0.09  |
| 0.50 | 16.45    | 25.62    | 36.92    | 55.36    |      |       |       |        |       |

Table S280: Critical values for detector  $\hat{H}_{mov}^{m,0.3}$  with windows size  $n = 0.3$ , and FM-OLS and D-OLS estimation in a model with intercept and linear trend. The number of integrated regressors is 4 and the highest power of  $x_{kt}$  is 1.

| m    | 90 %     | 95 %     | 97,5 %   | 99 %     | m    | 90 %  | 95 %  | 97,5 % | 99 %   |
|------|----------|----------|----------|----------|------|-------|-------|--------|--------|
| 0.10 | 26098.11 | 42976.75 | 63579.35 | 99460.45 | 0.51 | 28.87 | 46.66 | 69.96  | 110.45 |
| 0.11 | 18774.24 | 30713.81 | 46061.44 | 72310.64 | 0.52 | 25.45 | 41.47 | 61.37  | 96.42  |
| 0.12 | 13900.63 | 22549.84 | 33385.43 | 52262.82 | 0.53 | 22.58 | 36.47 | 54.79  | 84.66  |
| 0.13 | 10418.31 | 17093.84 | 25318.25 | 39888.17 | 0.54 | 19.92 | 32.28 | 48.46  | 74.87  |
| 0.14 | 8055.72  | 13131.18 | 19435.40 | 30305.07 | 0.55 | 17.69 | 28.56 | 42.45  | 66.31  |
| 0.15 | 6288.81  | 10354.01 | 15243.92 | 23498.27 | 0.56 | 15.67 | 25.31 | 37.42  | 59.17  |
| 0.16 | 4998.44  | 8207.66  | 12384.56 | 18801.17 | 0.57 | 13.88 | 22.33 | 33.14  | 51.73  |
| 0.17 | 4034.33  | 6563.29  | 9791.16  | 15310.75 | 0.58 | 12.17 | 19.72 | 29.04  | 45.27  |
| 0.18 | 3207.63  | 5307.62  | 7893.58  | 12428.24 | 0.59 | 10.70 | 17.22 | 25.47  | 38.88  |
| 0.19 | 2640.81  | 4293.03  | 6532.44  | 10160.12 | 0.60 | 9.46  | 15.25 | 22.43  | 33.98  |
| 0.20 | 2163.81  | 3567.52  | 5264.17  | 8415.51  | 0.61 | 8.32  | 13.35 | 19.39  | 29.51  |
| 0.21 | 1797.34  | 2969.25  | 4477.37  | 6861.06  | 0.62 | 7.34  | 11.69 | 17.11  | 25.87  |
| 0.22 | 1508.43  | 2483.47  | 3759.54  | 5868.58  | 0.63 | 6.48  | 10.27 | 14.90  | 22.76  |
| 0.23 | 1270.23  | 2085.46  | 3159.74  | 4974.07  | 0.64 | 5.71  | 8.95  | 13.05  | 19.81  |
| 0.24 | 1078.58  | 1776.44  | 2667.25  | 4193.27  | 0.65 | 4.98  | 7.85  | 11.42  | 17.41  |
| 0.25 | 918.82   | 1506.14  | 2253.05  | 3549.81  | 0.66 | 4.33  | 6.81  | 9.96   | 15.16  |
| 0.26 | 769.89   | 1269.38  | 1920.80  | 2970.08  | 0.67 | 3.78  | 5.97  | 8.68   | 13.08  |
| 0.27 | 661.11   | 1089.50  | 1633.83  | 2580.35  | 0.68 | 3.29  | 5.19  | 7.61   | 11.49  |
| 0.28 | 572.57   | 927.00   | 1406.99  | 2236.27  | 0.69 | 2.87  | 4.54  | 6.59   | 9.87   |
| 0.29 | 491.77   | 805.80   | 1214.80  | 1909.28  | 0.70 | 2.49  | 3.95  | 5.74   | 8.54   |
| 0.30 | 426.99   | 699.94   | 1051.33  | 1658.21  | 0.71 | 2.15  | 3.41  | 4.94   | 7.40   |
| 0.31 | 368.64   | 603.43   | 909.07   | 1436.26  | 0.72 | 1.86  | 2.92  | 4.26   | 6.30   |
| 0.32 | 320.31   | 527.41   | 787.05   | 1218.82  | 0.73 | 1.61  | 2.52  | 3.63   | 5.47   |
| 0.33 | 278.16   | 458.30   | 684.21   | 1059.20  | 0.74 | 1.39  | 2.17  | 3.11   | 4.70   |
| 0.34 | 242.75   | 398.30   | 603.62   | 927.77   | 0.75 | 1.19  | 1.86  | 2.66   | 4.02   |
| 0.35 | 211.22   | 349.44   | 527.47   | 818.87   | 0.76 | 1.01  | 1.59  | 2.27   | 3.36   |
| 0.36 | 184.97   | 304.39   | 457.30   | 713.85   | 0.77 | 0.87  | 1.34  | 1.93   | 2.84   |
| 0.37 | 161.51   | 265.93   | 401.80   | 630.66   | 0.78 | 0.73  | 1.13  | 1.62   | 2.41   |
| 0.38 | 142.30   | 233.63   | 354.29   | 556.85   | 0.79 | 0.62  | 0.95  | 1.35   | 2.03   |
| 0.39 | 125.75   | 205.88   | 311.74   | 484.86   | 0.80 | 0.53  | 0.80  | 1.12   | 1.69   |
| 0.40 | 111.39   | 181.74   | 272.68   | 430.34   | 0.81 | 0.44  | 0.66  | 0.94   | 1.39   |
| 0.41 | 98.62    | 161.59   | 241.78   | 376.11   | 0.82 | 0.37  | 0.55  | 0.78   | 1.14   |
| 0.42 | 87.36    | 142.30   | 213.61   | 333.33   | 0.83 | 0.30  | 0.46  | 0.64   | 0.93   |
| 0.43 | 77.08    | 125.50   | 186.39   | 297.35   | 0.84 | 0.25  | 0.37  | 0.53   | 0.77   |
| 0.44 | 67.89    | 110.45   | 166.59   | 261.07   | 0.85 | 0.20  | 0.31  | 0.43   | 0.62   |
| 0.45 | 60.12    | 98.04    | 146.84   | 231.69   | 0.86 | 0.17  | 0.25  | 0.35   | 0.50   |
| 0.46 | 52.81    | 86.79    | 130.51   | 205.11   | 0.87 | 0.14  | 0.20  | 0.27   | 0.39   |
| 0.47 | 47.07    | 76.47    | 115.42   | 183.88   | 0.88 | 0.11  | 0.16  | 0.22   | 0.31   |
| 0.48 | 41.92    | 67.36    | 102.96   | 160.67   | 0.89 | 0.09  | 0.12  | 0.17   | 0.24   |
| 0.49 | 36.93    | 59.93    | 89.64    | 141.60   | 0.90 | 0.07  | 0.10  | 0.13   | 0.18   |
| 0.50 | 32.69    | 53.16    | 79.37    | 125.84   |      |       |       |        |        |

Table S281: Critical values for detector  $\hat{H}_{mov}^{m,0.3}$  with windows size  $n = 0.3$ , and IM-OLS estimation in a model with intercept and linear trend. The number of integrated regressors is 4 and the highest power of  $x_{kt}$  is 1.

| m    | 90 %    | 95 %     | 97,5 %   | 99 %      | m    | 90 % | 95 %  | 97,5 % | 99 %  |
|------|---------|----------|----------|-----------|------|------|-------|--------|-------|
| 0.10 | 7945.61 | 19553.41 | 42211.91 | 101306.17 | 0.51 | 9.56 | 19.16 | 36.99  | 80.39 |
| 0.11 | 5724.55 | 14275.69 | 29997.73 | 70657.18  | 0.52 | 8.56 | 17.25 | 32.88  | 70.16 |
| 0.12 | 4264.56 | 10523.85 | 22139.52 | 53799.59  | 0.53 | 7.65 | 15.42 | 28.72  | 60.49 |
| 0.13 | 3257.33 | 8181.94  | 17042.91 | 40565.74  | 0.54 | 6.75 | 13.63 | 25.45  | 52.66 |
| 0.14 | 2466.55 | 6167.71  | 13192.49 | 30413.73  | 0.55 | 6.02 | 12.01 | 22.45  | 46.20 |
| 0.15 | 1948.65 | 4814.42  | 10452.84 | 24111.91  | 0.56 | 5.39 | 10.68 | 19.68  | 40.93 |
| 0.16 | 1517.39 | 3736.50  | 8058.25  | 19276.32  | 0.57 | 4.82 | 9.37  | 17.20  | 36.18 |
| 0.17 | 1225.07 | 2952.52  | 6223.05  | 15058.22  | 0.58 | 4.25 | 8.30  | 15.42  | 32.18 |
| 0.18 | 987.05  | 2380.51  | 5204.31  | 12189.18  | 0.59 | 3.76 | 7.35  | 13.49  | 27.92 |
| 0.19 | 805.81  | 1958.85  | 4215.32  | 9573.16   | 0.60 | 3.35 | 6.46  | 11.79  | 25.01 |
| 0.20 | 658.26  | 1593.63  | 3397.68  | 7840.12   | 0.61 | 2.98 | 5.76  | 10.54  | 21.36 |
| 0.21 | 557.87  | 1334.33  | 2915.02  | 6376.61   | 0.62 | 2.65 | 5.03  | 9.07   | 18.81 |
| 0.22 | 460.11  | 1116.93  | 2375.72  | 5380.85   | 0.63 | 2.35 | 4.48  | 7.97   | 16.02 |
| 0.23 | 390.06  | 937.69   | 1967.83  | 4570.11   | 0.64 | 2.08 | 3.88  | 6.92   | 13.98 |
| 0.24 | 328.74  | 773.59   | 1658.55  | 3723.52   | 0.65 | 1.83 | 3.44  | 6.08   | 12.34 |
| 0.25 | 278.71  | 656.75   | 1405.94  | 3176.51   | 0.66 | 1.61 | 3.03  | 5.30   | 10.59 |
| 0.26 | 237.85  | 552.30   | 1163.40  | 2698.81   | 0.67 | 1.41 | 2.64  | 4.61   | 9.18  |
| 0.27 | 204.14  | 472.28   | 985.96   | 2354.48   | 0.68 | 1.26 | 2.29  | 4.01   | 8.03  |
| 0.28 | 176.35  | 404.88   | 845.08   | 1984.60   | 0.69 | 1.11 | 2.00  | 3.51   | 6.76  |
| 0.29 | 151.61  | 348.14   | 729.98   | 1658.91   | 0.70 | 0.98 | 1.75  | 3.03   | 5.84  |
| 0.30 | 131.42  | 299.30   | 622.08   | 1431.31   | 0.71 | 0.86 | 1.52  | 2.59   | 4.97  |
| 0.31 | 113.71  | 257.98   | 536.99   | 1245.66   | 0.72 | 0.75 | 1.33  | 2.24   | 4.27  |
| 0.32 | 98.32   | 225.52   | 471.50   | 1070.66   | 0.73 | 0.66 | 1.15  | 1.92   | 3.58  |
| 0.33 | 86.49   | 195.08   | 399.20   | 942.66    | 0.74 | 0.57 | 1.01  | 1.66   | 3.06  |
| 0.34 | 76.26   | 171.73   | 352.93   | 822.43    | 0.75 | 0.50 | 0.86  | 1.39   | 2.58  |
| 0.35 | 66.89   | 152.60   | 303.90   | 703.13    | 0.76 | 0.43 | 0.74  | 1.19   | 2.17  |
| 0.36 | 58.76   | 132.10   | 268.74   | 604.92    | 0.77 | 0.37 | 0.63  | 1.01   | 1.79  |
| 0.37 | 51.53   | 115.07   | 232.83   | 525.54    | 0.78 | 0.32 | 0.53  | 0.84   | 1.51  |
| 0.38 | 45.33   | 99.44    | 205.66   | 456.97    | 0.79 | 0.27 | 0.45  | 0.71   | 1.27  |
| 0.39 | 39.91   | 87.36    | 176.83   | 391.91    | 0.80 | 0.23 | 0.38  | 0.59   | 1.02  |
| 0.40 | 35.60   | 76.82    | 154.56   | 340.71    | 0.81 | 0.19 | 0.32  | 0.49   | 0.84  |
| 0.41 | 31.36   | 67.49    | 134.81   | 298.91    | 0.82 | 0.16 | 0.26  | 0.40   | 0.68  |
| 0.42 | 27.54   | 59.52    | 117.87   | 258.94    | 0.83 | 0.14 | 0.22  | 0.33   | 0.56  |
| 0.43 | 24.51   | 51.93    | 102.94   | 222.94    | 0.84 | 0.11 | 0.18  | 0.27   | 0.43  |
| 0.44 | 21.59   | 45.64    | 90.98    | 198.45    | 0.85 | 0.09 | 0.15  | 0.22   | 0.35  |
| 0.45 | 19.39   | 40.54    | 80.48    | 175.25    | 0.86 | 0.08 | 0.12  | 0.17   | 0.27  |
| 0.46 | 17.27   | 36.19    | 70.51    | 155.79    | 0.87 | 0.06 | 0.09  | 0.13   | 0.21  |
| 0.47 | 15.22   | 31.56    | 60.88    | 138.16    | 0.88 | 0.05 | 0.07  | 0.10   | 0.16  |
| 0.48 | 13.60   | 27.97    | 54.01    | 122.10    | 0.89 | 0.04 | 0.06  | 0.08   | 0.12  |
| 0.49 | 12.16   | 25.15    | 47.82    | 108.18    | 0.90 | 0.03 | 0.04  | 0.06   | 0.09  |
| 0.50 | 10.76   | 21.78    | 41.79    | 92.49     |      |      |       |        |       |

Table S282: Critical values for detector  $\hat{H}_{mov}^{m,0.1}$  with windows size  $n = 0.1$ , and FM-OLS and D-OLS estimation in a model with intercept. The number of integrated regressors is 4 and the highest power of  $x_{kt}$  is 2.

| m    | 90 %     | 95 %     | 97,5 %    | 99 %      | m    | 90 %  | 95 %  | 97,5 % | 99 %   |
|------|----------|----------|-----------|-----------|------|-------|-------|--------|--------|
| 0.10 | 18280.29 | 46488.97 | 105906.79 | 261643.13 | 0.51 | 21.56 | 46.81 | 94.66  | 210.90 |
| 0.11 | 13080.24 | 33677.20 | 75505.03  | 188243.43 | 0.52 | 19.31 | 41.25 | 82.51  | 188.21 |
| 0.12 | 9739.30  | 25506.98 | 56635.19  | 142732.72 | 0.53 | 17.15 | 36.56 | 72.93  | 162.90 |
| 0.13 | 7416.01  | 19045.57 | 42493.94  | 105861.44 | 0.54 | 15.17 | 32.36 | 63.39  | 142.00 |
| 0.14 | 5708.85  | 14622.36 | 32497.87  | 81331.24  | 0.55 | 13.50 | 28.59 | 55.40  | 124.42 |
| 0.15 | 4459.43  | 11538.86 | 25604.11  | 64137.00  | 0.56 | 11.89 | 25.08 | 48.79  | 108.00 |
| 0.16 | 3567.66  | 9007.25  | 19633.18  | 50384.58  | 0.57 | 10.59 | 22.03 | 42.81  | 95.50  |
| 0.17 | 2835.80  | 7107.64  | 15724.85  | 39696.52  | 0.58 | 9.44  | 19.44 | 37.47  | 83.80  |
| 0.18 | 2237.71  | 5745.72  | 12439.59  | 31328.25  | 0.59 | 8.44  | 17.38 | 33.05  | 72.83  |
| 0.19 | 1839.15  | 4558.15  | 9918.49   | 24446.57  | 0.60 | 7.49  | 15.42 | 29.36  | 63.77  |
| 0.20 | 1523.75  | 3736.49  | 8063.53   | 20056.30  | 0.61 | 6.71  | 13.64 | 25.47  | 56.31  |
| 0.21 | 1265.81  | 3085.92  | 6718.34   | 16240.48  | 0.62 | 5.91  | 12.06 | 22.59  | 49.09  |
| 0.22 | 1042.03  | 2524.97  | 5569.07   | 13311.64  | 0.63 | 5.25  | 10.66 | 19.84  | 42.40  |
| 0.23 | 885.08   | 2143.29  | 4678.04   | 10934.91  | 0.64 | 4.67  | 9.42  | 17.35  | 37.27  |
| 0.24 | 753.41   | 1839.35  | 4001.52   | 9244.67   | 0.65 | 4.13  | 8.22  | 15.15  | 31.88  |
| 0.25 | 647.44   | 1587.48  | 3411.37   | 8148.17   | 0.66 | 3.64  | 7.13  | 13.11  | 27.47  |
| 0.26 | 546.67   | 1347.88  | 2937.31   | 7117.72   | 0.67 | 3.20  | 6.20  | 11.29  | 23.81  |
| 0.27 | 468.88   | 1131.23  | 2505.42   | 5958.96   | 0.68 | 2.82  | 5.41  | 9.84   | 20.83  |
| 0.28 | 400.19   | 961.14   | 2102.83   | 4991.21   | 0.69 | 2.46  | 4.76  | 8.61   | 18.04  |
| 0.29 | 345.86   | 826.12   | 1805.81   | 4147.91   | 0.70 | 2.16  | 4.17  | 7.58   | 15.46  |
| 0.30 | 298.41   | 710.25   | 1530.39   | 3649.29   | 0.71 | 1.89  | 3.65  | 6.50   | 13.19  |
| 0.31 | 257.02   | 612.27   | 1334.13   | 3081.89   | 0.72 | 1.65  | 3.16  | 5.56   | 11.52  |
| 0.32 | 224.41   | 529.13   | 1139.06   | 2650.60   | 0.73 | 1.44  | 2.72  | 4.85   | 9.81   |
| 0.33 | 196.94   | 460.21   | 981.45    | 2343.07   | 0.74 | 1.26  | 2.34  | 4.10   | 8.33   |
| 0.34 | 171.85   | 401.66   | 864.91    | 2064.40   | 0.75 | 1.09  | 2.01  | 3.49   | 7.08   |
| 0.35 | 151.13   | 352.46   | 763.85    | 1795.89   | 0.76 | 0.94  | 1.70  | 2.93   | 6.03   |
| 0.36 | 132.53   | 307.85   | 658.17    | 1578.62   | 0.77 | 0.80  | 1.45  | 2.52   | 4.96   |
| 0.37 | 116.80   | 268.76   | 577.83    | 1394.96   | 0.78 | 0.69  | 1.23  | 2.09   | 4.02   |
| 0.38 | 102.54   | 235.18   | 506.18    | 1204.85   | 0.79 | 0.59  | 1.04  | 1.74   | 3.29   |
| 0.39 | 90.50    | 205.53   | 434.77    | 1051.95   | 0.80 | 0.50  | 0.87  | 1.44   | 2.75   |
| 0.40 | 79.98    | 183.04   | 381.95    | 902.13    | 0.81 | 0.42  | 0.73  | 1.21   | 2.23   |
| 0.41 | 70.57    | 160.91   | 330.52    | 766.78    | 0.82 | 0.35  | 0.61  | 0.99   | 1.83   |
| 0.42 | 62.15    | 140.29   | 287.81    | 675.23    | 0.83 | 0.30  | 0.51  | 0.82   | 1.46   |
| 0.43 | 54.19    | 123.28   | 252.31    | 595.77    | 0.84 | 0.25  | 0.42  | 0.66   | 1.16   |
| 0.44 | 47.99    | 107.73   | 222.24    | 513.08    | 0.85 | 0.21  | 0.34  | 0.53   | 0.91   |
| 0.45 | 42.72    | 94.81    | 196.08    | 455.78    | 0.86 | 0.17  | 0.28  | 0.43   | 0.72   |
| 0.46 | 38.36    | 85.64    | 174.77    | 395.53    | 0.87 | 0.14  | 0.22  | 0.34   | 0.57   |
| 0.47 | 34.25    | 76.41    | 154.25    | 347.73    | 0.88 | 0.11  | 0.17  | 0.26   | 0.43   |
| 0.48 | 30.40    | 67.13    | 136.10    | 310.55    | 0.89 | 0.09  | 0.14  | 0.20   | 0.32   |
| 0.49 | 27.25    | 59.11    | 120.39    | 270.82    | 0.90 | 0.07  | 0.10  | 0.15   | 0.25   |
| 0.50 | 24.24    | 53.07    | 106.85    | 238.15    |      |       |       |        |        |

Table S283: Critical values for detector  $\hat{H}_{mov}^{m,0.1}$  with windows size  $n = 0.1$ , and IM-OLS estimation in a model with intercept. The number of integrated regressors is 4 and the highest power of  $x_{kt}$  is 2.

| m    | 90 %     | 95 %     | 97,5 %   | 99 %      | m    | 90 %  | 95 %  | 97,5 % | 99 %   |
|------|----------|----------|----------|-----------|------|-------|-------|--------|--------|
| 0.10 | 12298.85 | 30481.49 | 65856.20 | 159686.27 | 0.51 | 13.73 | 27.19 | 51.80  | 112.09 |
| 0.11 | 8890.43  | 22258.95 | 46678.03 | 110617.51 | 0.52 | 12.28 | 24.53 | 46.34  | 98.46  |
| 0.12 | 6575.40  | 16464.86 | 34695.47 | 84312.92  | 0.53 | 10.93 | 21.64 | 40.10  | 82.45  |
| 0.13 | 5033.77  | 12820.39 | 26613.43 | 62503.06  | 0.54 | 9.64  | 19.20 | 35.40  | 72.92  |
| 0.14 | 3836.25  | 9580.36  | 20645.26 | 47543.17  | 0.55 | 8.52  | 16.80 | 30.90  | 63.17  |
| 0.15 | 3007.42  | 7506.42  | 16291.01 | 37570.13  | 0.56 | 7.59  | 14.90 | 27.17  | 55.50  |
| 0.16 | 2336.89  | 5804.88  | 12476.58 | 29915.37  | 0.57 | 6.76  | 13.02 | 23.55  | 48.37  |
| 0.17 | 1892.06  | 4566.29  | 9731.14  | 23592.02  | 0.58 | 5.93  | 11.40 | 20.95  | 43.03  |
| 0.18 | 1521.77  | 3693.20  | 8133.59  | 19012.55  | 0.59 | 5.21  | 9.99  | 18.23  | 36.79  |
| 0.19 | 1244.80  | 3037.01  | 6487.33  | 14912.75  | 0.60 | 4.64  | 8.75  | 15.67  | 32.74  |
| 0.20 | 1018.76  | 2468.87  | 5280.72  | 12052.85  | 0.61 | 4.08  | 7.74  | 13.96  | 28.19  |
| 0.21 | 859.51   | 2061.55  | 4450.67  | 9992.99   | 0.62 | 3.61  | 6.77  | 12.10  | 24.65  |
| 0.22 | 709.82   | 1719.26  | 3683.33  | 8279.47   | 0.63 | 3.19  | 5.93  | 10.43  | 20.79  |
| 0.23 | 602.14   | 1442.80  | 3009.83  | 7081.84   | 0.64 | 2.77  | 5.11  | 9.02   | 18.14  |
| 0.24 | 503.69   | 1191.16  | 2531.41  | 5738.77   | 0.65 | 2.43  | 4.52  | 7.88   | 15.68  |
| 0.25 | 427.89   | 1012.97  | 2148.37  | 4853.71   | 0.66 | 2.13  | 3.94  | 6.85   | 13.33  |
| 0.26 | 366.00   | 844.57   | 1783.83  | 4149.85   | 0.67 | 1.85  | 3.40  | 5.79   | 11.52  |
| 0.27 | 312.80   | 721.42   | 1496.48  | 3589.09   | 0.68 | 1.64  | 2.93  | 5.05   | 10.03  |
| 0.28 | 270.15   | 619.73   | 1290.50  | 3008.76   | 0.69 | 1.43  | 2.54  | 4.38   | 8.33   |
| 0.29 | 233.09   | 528.76   | 1106.67  | 2563.60   | 0.70 | 1.24  | 2.20  | 3.74   | 7.15   |
| 0.30 | 200.89   | 454.49   | 940.11   | 2186.45   | 0.71 | 1.08  | 1.89  | 3.18   | 5.98   |
| 0.31 | 173.10   | 393.27   | 817.96   | 1893.13   | 0.72 | 0.95  | 1.64  | 2.71   | 5.03   |
| 0.32 | 150.01   | 342.35   | 716.43   | 1601.09   | 0.73 | 0.81  | 1.40  | 2.30   | 4.16   |
| 0.33 | 131.31   | 295.14   | 600.11   | 1427.75   | 0.74 | 0.70  | 1.21  | 1.96   | 3.57   |
| 0.34 | 115.64   | 258.84   | 530.13   | 1251.17   | 0.75 | 0.60  | 1.02  | 1.63   | 2.99   |
| 0.35 | 100.92   | 227.87   | 456.55   | 1057.92   | 0.76 | 0.51  | 0.87  | 1.38   | 2.45   |
| 0.36 | 88.79    | 197.59   | 398.99   | 903.36    | 0.77 | 0.43  | 0.72  | 1.15   | 2.02   |
| 0.37 | 77.56    | 172.19   | 349.48   | 776.45    | 0.78 | 0.36  | 0.60  | 0.95   | 1.68   |
| 0.38 | 68.25    | 147.77   | 305.90   | 674.98    | 0.79 | 0.31  | 0.51  | 0.79   | 1.38   |
| 0.39 | 60.07    | 129.91   | 260.32   | 584.49    | 0.80 | 0.26  | 0.42  | 0.64   | 1.11   |
| 0.40 | 53.33    | 113.75   | 226.78   | 503.81    | 0.81 | 0.22  | 0.35  | 0.53   | 0.90   |
| 0.41 | 46.72    | 99.60    | 199.37   | 442.33    | 0.82 | 0.18  | 0.28  | 0.43   | 0.72   |
| 0.42 | 41.19    | 88.23    | 175.58   | 370.76    | 0.83 | 0.15  | 0.23  | 0.35   | 0.59   |
| 0.43 | 36.39    | 76.75    | 151.76   | 323.70    | 0.84 | 0.12  | 0.19  | 0.28   | 0.45   |
| 0.44 | 31.96    | 66.90    | 133.85   | 288.49    | 0.85 | 0.10  | 0.15  | 0.22   | 0.36   |
| 0.45 | 28.64    | 58.99    | 116.69   | 250.19    | 0.86 | 0.08  | 0.12  | 0.18   | 0.27   |
| 0.46 | 25.32    | 52.59    | 102.00   | 222.29    | 0.87 | 0.07  | 0.10  | 0.14   | 0.22   |
| 0.47 | 22.31    | 45.74    | 87.67    | 195.80    | 0.88 | 0.05  | 0.08  | 0.11   | 0.16   |
| 0.48 | 19.84    | 39.99    | 76.72    | 172.50    | 0.89 | 0.04  | 0.06  | 0.08   | 0.12   |
| 0.49 | 17.68    | 36.18    | 68.51    | 151.70    | 0.90 | 0.04  | 0.05  | 0.07   | 0.09   |
| 0.50 | 15.60    | 31.13    | 59.53    | 130.34    |      |       |       |        |        |

Table S284: Critical values for detector  $\hat{H}_{mov}^{m,0.2}$  with windows size  $n = 0.2$ , and FM-OLS and D-OLS estimation in a model with intercept. The number of integrated regressors is 4 and the highest power of  $x_{kt}$  is 2.

| m    | 90 %     | 95 %     | 97,5 %    | 99 %      | m    | 90 %  | 95 %  | 97,5 % | 99 %   |
|------|----------|----------|-----------|-----------|------|-------|-------|--------|--------|
| 0.10 | 28084.09 | 72008.51 | 164594.03 | 410161.78 | 0.51 | 31.11 | 66.31 | 132.63 | 294.91 |
| 0.11 | 20120.97 | 52533.12 | 118157.66 | 298060.88 | 0.52 | 27.64 | 58.73 | 116.28 | 264.14 |
| 0.12 | 14998.17 | 39655.31 | 87885.22  | 221623.47 | 0.53 | 24.33 | 51.37 | 101.38 | 223.42 |
| 0.13 | 11506.72 | 29653.27 | 66549.46  | 167673.08 | 0.54 | 21.48 | 45.15 | 88.37  | 192.71 |
| 0.14 | 8786.50  | 22694.85 | 50784.94  | 127887.65 | 0.55 | 19.01 | 39.86 | 77.22  | 169.55 |
| 0.15 | 6857.34  | 17828.05 | 39768.49  | 101956.36 | 0.56 | 16.75 | 34.87 | 67.13  | 146.98 |
| 0.16 | 5503.63  | 13964.43 | 30567.98  | 78388.49  | 0.57 | 14.80 | 30.53 | 58.25  | 128.75 |
| 0.17 | 4364.89  | 11035.72 | 24554.04  | 62566.22  | 0.58 | 13.12 | 26.84 | 50.89  | 113.85 |
| 0.18 | 3441.01  | 8842.21  | 19304.74  | 49019.38  | 0.59 | 11.61 | 23.77 | 44.84  | 99.43  |
| 0.19 | 2841.10  | 7000.09  | 15346.89  | 38057.78  | 0.60 | 10.25 | 20.79 | 39.31  | 85.58  |
| 0.20 | 2362.42  | 5772.73  | 12457.76  | 31068.93  | 0.61 | 9.14  | 18.35 | 34.40  | 73.75  |
| 0.21 | 1950.72  | 4769.48  | 10350.09  | 25329.44  | 0.62 | 8.00  | 16.09 | 29.96  | 64.13  |
| 0.22 | 1597.81  | 3870.80  | 8582.09   | 20557.57  | 0.63 | 7.05  | 14.12 | 26.27  | 55.41  |
| 0.23 | 1363.17  | 3299.54  | 7158.96   | 16801.80  | 0.64 | 6.22  | 12.37 | 22.76  | 47.80  |
| 0.24 | 1160.65  | 2833.16  | 6164.87   | 14238.49  | 0.65 | 5.45  | 10.73 | 19.76  | 40.55  |
| 0.25 | 991.07   | 2427.73  | 5256.87   | 12571.73  | 0.66 | 4.77  | 9.24  | 16.90  | 35.01  |
| 0.26 | 839.73   | 2062.51  | 4466.50   | 10785.66  | 0.67 | 4.19  | 8.02  | 14.32  | 29.78  |
| 0.27 | 717.94   | 1720.14  | 3823.09   | 9238.34   | 0.68 | 3.65  | 6.89  | 12.35  | 26.04  |
| 0.28 | 611.70   | 1465.44  | 3213.72   | 7541.57   | 0.69 | 3.18  | 6.02  | 10.73  | 22.13  |
| 0.29 | 529.41   | 1270.06  | 2716.26   | 6326.63   | 0.70 | 2.76  | 5.25  | 9.37   | 19.02  |
| 0.30 | 452.42   | 1079.66  | 2329.70   | 5418.30   | 0.71 | 2.38  | 4.56  | 7.94   | 15.68  |
| 0.31 | 391.34   | 923.03   | 2016.27   | 4616.18   | 0.72 | 2.06  | 3.90  | 6.76   | 13.72  |
| 0.32 | 340.21   | 797.11   | 1719.27   | 4038.68   | 0.73 | 1.78  | 3.31  | 5.80   | 11.63  |
| 0.33 | 297.79   | 694.64   | 1485.69   | 3487.59   | 0.74 | 1.55  | 2.83  | 4.85   | 9.72   |
| 0.34 | 259.21   | 602.27   | 1308.27   | 3102.03   | 0.75 | 1.32  | 2.40  | 4.10   | 8.17   |
| 0.35 | 228.12   | 528.63   | 1147.87   | 2711.20   | 0.76 | 1.13  | 2.01  | 3.40   | 6.87   |
| 0.36 | 199.89   | 461.55   | 985.24    | 2330.08   | 0.77 | 0.95  | 1.70  | 2.87   | 5.60   |
| 0.37 | 175.83   | 404.73   | 868.06    | 2073.56   | 0.78 | 0.80  | 1.42  | 2.37   | 4.45   |
| 0.38 | 153.31   | 350.83   | 750.27    | 1798.15   | 0.79 | 0.68  | 1.18  | 1.95   | 3.60   |
| 0.39 | 135.31   | 303.09   | 644.26    | 1556.45   | 0.80 | 0.57  | 0.98  | 1.59   | 2.95   |
| 0.40 | 119.04   | 272.48   | 566.44    | 1332.99   | 0.81 | 0.47  | 0.80  | 1.32   | 2.41   |
| 0.41 | 104.99   | 238.81   | 486.33    | 1132.19   | 0.82 | 0.39  | 0.67  | 1.07   | 1.95   |
| 0.42 | 92.40    | 206.02   | 418.49    | 986.31    | 0.83 | 0.32  | 0.55  | 0.87   | 1.53   |
| 0.43 | 80.34    | 181.54   | 367.28    | 863.76    | 0.84 | 0.27  | 0.44  | 0.70   | 1.21   |
| 0.44 | 70.58    | 157.49   | 323.26    | 749.27    | 0.85 | 0.22  | 0.36  | 0.55   | 0.94   |
| 0.45 | 62.77    | 138.23   | 284.68    | 651.89    | 0.86 | 0.18  | 0.29  | 0.44   | 0.74   |
| 0.46 | 56.02    | 123.67   | 251.87    | 567.26    | 0.87 | 0.14  | 0.23  | 0.35   | 0.57   |
| 0.47 | 49.81    | 109.82   | 221.06    | 492.33    | 0.88 | 0.11  | 0.18  | 0.27   | 0.44   |
| 0.48 | 44.22    | 97.04    | 193.33    | 443.63    | 0.89 | 0.09  | 0.14  | 0.20   | 0.33   |
| 0.49 | 39.42    | 85.75    | 171.37    | 380.10    | 0.90 | 0.07  | 0.11  | 0.16   | 0.25   |
| 0.50 | 35.10    | 75.56    | 150.35    | 338.73    |      |       |       |        |        |

Table S285: Critical values for detector  $\hat{H}_{mov}^{m,0.2}$  with windows size  $n = 0.2$ , and IM-OLS estimation in a model with intercept. The number of integrated regressors is 4 and the highest power of  $x_{kt}$  is 2.

| m    | 90 %     | 95 %     | 97,5 %   | 99 %      | m    | 90 %  | 95 %  | 97,5 % | 99 %   |
|------|----------|----------|----------|-----------|------|-------|-------|--------|--------|
| 0.10 | 14484.97 | 36387.93 | 78490.74 | 190057.36 | 0.51 | 15.24 | 29.90 | 56.45  | 122.45 |
| 0.11 | 10479.12 | 26580.60 | 55839.29 | 132581.94 | 0.52 | 13.55 | 26.97 | 50.41  | 106.00 |
| 0.12 | 7734.97  | 19508.41 | 41321.92 | 100293.92 | 0.53 | 12.03 | 23.61 | 43.44  | 89.10  |
| 0.13 | 5937.19  | 15268.24 | 31675.20 | 74537.06  | 0.54 | 10.61 | 20.95 | 38.12  | 78.51  |
| 0.14 | 4537.84  | 11388.05 | 24571.08 | 56334.82  | 0.55 | 9.32  | 18.20 | 33.37  | 67.68  |
| 0.15 | 3559.12  | 8896.89  | 19362.83 | 44407.71  | 0.56 | 8.26  | 16.10 | 29.18  | 59.40  |
| 0.16 | 2767.74  | 6860.84  | 14824.85 | 35619.37  | 0.57 | 7.31  | 14.02 | 25.21  | 51.13  |
| 0.17 | 2233.72  | 5406.22  | 11499.21 | 27620.20  | 0.58 | 6.39  | 12.19 | 22.23  | 45.09  |
| 0.18 | 1801.34  | 4369.83  | 9627.63  | 22476.49  | 0.59 | 5.61  | 10.64 | 19.36  | 38.89  |
| 0.19 | 1465.78  | 3570.94  | 7637.74  | 17664.91  | 0.60 | 4.98  | 9.31  | 16.56  | 34.49  |
| 0.20 | 1204.83  | 2908.55  | 6191.68  | 14338.61  | 0.61 | 4.36  | 8.16  | 14.65  | 29.46  |
| 0.21 | 1012.51  | 2430.44  | 5236.99  | 11829.83  | 0.62 | 3.83  | 7.14  | 12.63  | 25.62  |
| 0.22 | 833.61   | 2016.78  | 4326.54  | 9693.14   | 0.63 | 3.37  | 6.21  | 10.88  | 21.47  |
| 0.23 | 708.09   | 1690.75  | 3542.95  | 8306.10   | 0.64 | 2.92  | 5.35  | 9.33   | 18.75  |
| 0.24 | 592.09   | 1405.81  | 2956.05  | 6762.72   | 0.65 | 2.55  | 4.71  | 8.12   | 16.11  |
| 0.25 | 506.18   | 1178.41  | 2495.06  | 5717.44   | 0.66 | 2.22  | 4.08  | 7.05   | 13.63  |
| 0.26 | 429.60   | 988.09   | 2086.80  | 4847.08   | 0.67 | 1.92  | 3.51  | 5.97   | 11.72  |
| 0.27 | 365.39   | 843.07   | 1740.54  | 4156.49   | 0.68 | 1.69  | 3.02  | 5.15   | 10.23  |
| 0.28 | 315.10   | 725.32   | 1493.72  | 3478.24   | 0.69 | 1.47  | 2.59  | 4.48   | 8.43   |
| 0.29 | 271.74   | 616.70   | 1278.27  | 2963.07   | 0.70 | 1.27  | 2.24  | 3.80   | 7.20   |
| 0.30 | 233.87   | 527.67   | 1097.04  | 2539.00   | 0.71 | 1.10  | 1.92  | 3.22   | 6.03   |
| 0.31 | 201.87   | 461.01   | 945.47   | 2196.12   | 0.72 | 0.96  | 1.66  | 2.75   | 5.05   |
| 0.32 | 173.76   | 396.52   | 825.29   | 1867.45   | 0.73 | 0.82  | 1.41  | 2.31   | 4.18   |
| 0.33 | 152.18   | 338.72   | 689.68   | 1651.59   | 0.74 | 0.71  | 1.22  | 1.98   | 3.59   |
| 0.34 | 133.44   | 297.93   | 610.10   | 1438.83   | 0.75 | 0.60  | 1.03  | 1.63   | 2.99   |
| 0.35 | 116.78   | 261.80   | 519.84   | 1204.16   | 0.76 | 0.51  | 0.87  | 1.38   | 2.46   |
| 0.36 | 102.72   | 226.83   | 457.20   | 1041.50   | 0.77 | 0.43  | 0.73  | 1.16   | 2.02   |
| 0.37 | 89.48    | 196.55   | 401.51   | 873.08    | 0.78 | 0.37  | 0.61  | 0.95   | 1.68   |
| 0.38 | 78.44    | 169.28   | 348.35   | 770.23    | 0.79 | 0.31  | 0.51  | 0.80   | 1.38   |
| 0.39 | 69.09    | 147.63   | 295.87   | 658.25    | 0.80 | 0.26  | 0.42  | 0.65   | 1.11   |
| 0.40 | 61.27    | 129.51   | 257.33   | 571.34    | 0.81 | 0.22  | 0.35  | 0.53   | 0.90   |
| 0.41 | 53.47    | 113.14   | 224.08   | 499.17    | 0.82 | 0.18  | 0.29  | 0.43   | 0.73   |
| 0.42 | 47.06    | 100.15   | 197.83   | 417.08    | 0.83 | 0.15  | 0.24  | 0.35   | 0.59   |
| 0.43 | 41.23    | 86.77    | 168.91   | 364.03    | 0.84 | 0.13  | 0.20  | 0.28   | 0.45   |
| 0.44 | 36.18    | 75.15    | 150.14   | 320.05    | 0.85 | 0.11  | 0.16  | 0.23   | 0.36   |
| 0.45 | 32.43    | 66.22    | 130.18   | 276.31    | 0.86 | 0.09  | 0.13  | 0.18   | 0.28   |
| 0.46 | 28.49    | 58.78    | 114.02   | 246.41    | 0.87 | 0.07  | 0.11  | 0.15   | 0.22   |
| 0.47 | 25.13    | 51.19    | 97.28    | 215.87    | 0.88 | 0.06  | 0.09  | 0.12   | 0.17   |
| 0.48 | 22.25    | 44.53    | 85.12    | 189.78    | 0.89 | 0.05  | 0.07  | 0.10   | 0.14   |
| 0.49 | 19.79    | 39.95    | 75.40    | 164.84    | 0.90 | 0.05  | 0.06  | 0.08   | 0.11   |
| 0.50 | 17.40    | 34.42    | 65.54    | 141.57    |      |       |       |        |        |

Table S286: Critical values for detector  $\hat{H}_{mov}^{m,0.3}$  with windows size  $n = 0.3$ , and FM-OLS and D-OLS estimation in a model with intercept. The number of integrated regressors is 4 and the highest power of  $x_{kt}$  is 2.

| m    | 90 %     | 95 %     | 97,5 %    | 99 %      | m    | 90 %  | 95 %  | 97,5 % | 99 %   |
|------|----------|----------|-----------|-----------|------|-------|-------|--------|--------|
| 0.10 | 33212.36 | 85436.86 | 193820.87 | 489750.75 | 0.51 | 34.51 | 72.68 | 144.95 | 322.27 |
| 0.11 | 23842.99 | 62292.71 | 140419.58 | 352981.89 | 0.52 | 30.42 | 64.29 | 125.25 | 287.50 |
| 0.12 | 17691.33 | 46967.96 | 103898.51 | 263943.46 | 0.53 | 26.85 | 56.16 | 110.10 | 241.83 |
| 0.13 | 13573.71 | 35350.85 | 78835.25  | 198499.19 | 0.54 | 23.52 | 49.29 | 95.41  | 206.46 |
| 0.14 | 10317.35 | 26787.24 | 59845.85  | 154648.51 | 0.55 | 20.80 | 43.39 | 82.73  | 180.80 |
| 0.15 | 8139.92  | 21066.62 | 47131.04  | 121135.15 | 0.56 | 18.22 | 37.61 | 72.48  | 157.52 |
| 0.16 | 6476.27  | 16488.15 | 36302.55  | 92328.62  | 0.57 | 16.05 | 32.87 | 62.65  | 137.43 |
| 0.17 | 5150.31  | 13061.31 | 29154.24  | 73745.85  | 0.58 | 14.15 | 28.72 | 54.39  | 121.25 |
| 0.18 | 4062.04  | 10451.94 | 22754.27  | 57818.30  | 0.59 | 12.47 | 25.36 | 47.38  | 105.10 |
| 0.19 | 3331.96  | 8230.11  | 18141.89  | 44980.31  | 0.60 | 11.01 | 22.20 | 41.49  | 89.63  |
| 0.20 | 2775.00  | 6771.16  | 14642.15  | 36032.54  | 0.61 | 9.73  | 19.41 | 36.23  | 77.36  |
| 0.21 | 2288.81  | 5615.31  | 12202.62  | 29753.30  | 0.62 | 8.51  | 16.90 | 31.59  | 66.39  |
| 0.22 | 1883.88  | 4540.54  | 10104.26  | 24245.74  | 0.63 | 7.46  | 14.79 | 27.57  | 57.75  |
| 0.23 | 1601.80  | 3880.55  | 8455.50   | 19926.91  | 0.64 | 6.55  | 12.91 | 23.64  | 49.17  |
| 0.24 | 1367.84  | 3295.24  | 7212.43   | 16716.71  | 0.65 | 5.71  | 11.14 | 20.46  | 41.56  |
| 0.25 | 1167.67  | 2836.80  | 6162.28   | 14721.19  | 0.66 | 4.98  | 9.55  | 17.40  | 35.88  |
| 0.26 | 984.66   | 2399.05  | 5217.21   | 12631.42  | 0.67 | 4.36  | 8.28  | 14.75  | 30.46  |
| 0.27 | 842.97   | 2001.03  | 4404.53   | 10788.05  | 0.68 | 3.77  | 7.10  | 12.66  | 26.54  |
| 0.28 | 716.26   | 1705.80  | 3728.34   | 8808.67   | 0.69 | 3.28  | 6.17  | 10.95  | 22.47  |
| 0.29 | 619.82   | 1484.72  | 3158.26   | 7325.96   | 0.70 | 2.83  | 5.37  | 9.53   | 19.20  |
| 0.30 | 529.21   | 1249.08  | 2705.02   | 6330.63   | 0.71 | 2.44  | 4.63  | 8.07   | 15.91  |
| 0.31 | 458.51   | 1069.97  | 2328.76   | 5305.19   | 0.72 | 2.11  | 3.95  | 6.85   | 13.82  |
| 0.32 | 393.94   | 921.57   | 1972.49   | 4664.66   | 0.73 | 1.81  | 3.35  | 5.83   | 11.70  |
| 0.33 | 344.45   | 794.94   | 1711.18   | 3983.72   | 0.74 | 1.56  | 2.86  | 4.90   | 9.75   |
| 0.34 | 299.23   | 694.01   | 1507.84   | 3550.06   | 0.75 | 1.33  | 2.41  | 4.12   | 8.20   |
| 0.35 | 263.91   | 609.22   | 1305.79   | 3093.20   | 0.76 | 1.14  | 2.02  | 3.41   | 6.89   |
| 0.36 | 231.66   | 529.37   | 1132.65   | 2655.61   | 0.77 | 0.95  | 1.70  | 2.88   | 5.61   |
| 0.37 | 201.87   | 464.15   | 990.06    | 2339.05   | 0.78 | 0.80  | 1.42  | 2.38   | 4.45   |
| 0.38 | 176.74   | 402.97   | 846.49    | 2056.84   | 0.79 | 0.68  | 1.18  | 1.95   | 3.60   |
| 0.39 | 154.88   | 346.38   | 728.50    | 1776.98   | 0.80 | 0.57  | 0.98  | 1.59   | 2.96   |
| 0.40 | 135.86   | 309.19   | 641.82    | 1516.99   | 0.81 | 0.47  | 0.81  | 1.32   | 2.41   |
| 0.41 | 120.04   | 272.03   | 550.76    | 1279.98   | 0.82 | 0.39  | 0.67  | 1.07   | 1.95   |
| 0.42 | 105.02   | 233.91   | 468.96    | 1097.91   | 0.83 | 0.32  | 0.55  | 0.87   | 1.53   |
| 0.43 | 91.29    | 204.49   | 411.47    | 960.03    | 0.84 | 0.27  | 0.45  | 0.70   | 1.21   |
| 0.44 | 79.99    | 177.70   | 361.46    | 826.22    | 0.85 | 0.22  | 0.36  | 0.56   | 0.94   |
| 0.45 | 70.98    | 154.80   | 317.04    | 719.77    | 0.86 | 0.18  | 0.29  | 0.44   | 0.74   |
| 0.46 | 63.37    | 137.85   | 280.08    | 620.27    | 0.87 | 0.14  | 0.23  | 0.35   | 0.58   |
| 0.47 | 55.85    | 122.10   | 246.94    | 542.38    | 0.88 | 0.11  | 0.18  | 0.27   | 0.44   |
| 0.48 | 49.64    | 107.35   | 213.81    | 488.99    | 0.89 | 0.09  | 0.14  | 0.21   | 0.33   |
| 0.49 | 44.06    | 94.76    | 188.61    | 419.27    | 0.90 | 0.07  | 0.11  | 0.16   | 0.25   |
| 0.50 | 39.07    | 83.28    | 164.88    | 369.13    |      |       |       |        |        |

Table S287: Critical values for detector  $\hat{H}_{mov}^{m,0.3}$  with windows size  $n = 0.3$ , and IM-OLS estimation in a model with intercept. The number of integrated regressors is 4 and the highest power of  $x_{kt}$  is 2.



| m    | 90 %     | 95 %     | 97,5 %   | 99 %      | m    | 90 %  | 95 %  | 97,5 % | 99 %  |
|------|----------|----------|----------|-----------|------|-------|-------|--------|-------|
| 0.10 | 25070.23 | 47592.78 | 87500.90 | 180621.00 | 0.51 | 16.99 | 29.59 | 49.87  | 96.55 |
| 0.11 | 17693.15 | 33624.49 | 60546.66 | 126351.88 | 0.52 | 14.98 | 26.44 | 43.68  | 84.77 |
| 0.12 | 12588.31 | 24035.22 | 43797.89 | 90631.52  | 0.53 | 13.23 | 23.23 | 39.09  | 73.71 |
| 0.13 | 9285.19  | 17770.91 | 32380.66 | 65292.65  | 0.54 | 11.85 | 20.71 | 34.01  | 63.52 |
| 0.14 | 6916.62  | 12902.21 | 23868.49 | 48250.27  | 0.55 | 10.41 | 18.18 | 29.76  | 55.49 |
| 0.15 | 5326.83  | 10105.57 | 18262.01 | 38047.39  | 0.56 | 9.29  | 16.01 | 26.32  | 47.99 |
| 0.16 | 4089.19  | 7650.08  | 14018.68 | 29227.46  | 0.57 | 8.22  | 14.10 | 22.86  | 41.89 |
| 0.17 | 3196.52  | 5940.52  | 10668.41 | 22168.15  | 0.58 | 7.19  | 12.45 | 20.30  | 37.79 |
| 0.18 | 2555.07  | 4777.84  | 8556.51  | 17941.10  | 0.59 | 6.32  | 10.95 | 17.75  | 32.67 |
| 0.19 | 2030.47  | 3795.01  | 6807.01  | 14201.01  | 0.60 | 5.59  | 9.66  | 15.56  | 29.44 |
| 0.20 | 1654.20  | 3058.54  | 5524.05  | 11346.36  | 0.61 | 4.90  | 8.56  | 13.70  | 25.70 |
| 0.21 | 1356.85  | 2521.57  | 4494.47  | 9124.78   | 0.62 | 4.37  | 7.47  | 12.09  | 22.42 |
| 0.22 | 1104.84  | 2053.67  | 3714.87  | 7487.16   | 0.63 | 3.85  | 6.59  | 10.52  | 18.88 |
| 0.23 | 919.42   | 1702.50  | 2978.50  | 6247.77   | 0.64 | 3.37  | 5.69  | 9.10   | 16.46 |
| 0.24 | 760.50   | 1413.87  | 2482.42  | 5158.08   | 0.65 | 2.94  | 4.97  | 7.99   | 14.26 |
| 0.25 | 634.26   | 1165.48  | 2094.19  | 4238.50   | 0.66 | 2.56  | 4.37  | 7.00   | 12.58 |
| 0.26 | 529.29   | 970.11   | 1721.52  | 3607.89   | 0.67 | 2.24  | 3.82  | 6.08   | 10.67 |
| 0.27 | 449.74   | 822.68   | 1464.93  | 3017.23   | 0.68 | 1.97  | 3.30  | 5.22   | 9.47  |
| 0.28 | 382.23   | 696.73   | 1234.50  | 2543.23   | 0.69 | 1.73  | 2.87  | 4.57   | 7.98  |
| 0.29 | 325.67   | 590.99   | 1045.56  | 2139.22   | 0.70 | 1.49  | 2.49  | 3.94   | 6.87  |
| 0.30 | 279.69   | 504.07   | 894.75   | 1875.99   | 0.71 | 1.30  | 2.15  | 3.41   | 5.88  |
| 0.31 | 239.28   | 434.12   | 767.91   | 1590.76   | 0.72 | 1.13  | 1.88  | 2.92   | 5.03  |
| 0.32 | 206.24   | 376.60   | 670.95   | 1340.25   | 0.73 | 0.98  | 1.61  | 2.51   | 4.20  |
| 0.33 | 177.36   | 323.67   | 569.86   | 1178.83   | 0.74 | 0.85  | 1.38  | 2.13   | 3.61  |
| 0.34 | 154.87   | 281.75   | 498.34   | 1031.32   | 0.75 | 0.73  | 1.17  | 1.80   | 3.02  |
| 0.35 | 133.49   | 244.15   | 426.68   | 881.32    | 0.76 | 0.63  | 1.00  | 1.52   | 2.51  |
| 0.36 | 117.21   | 211.30   | 370.07   | 758.41    | 0.77 | 0.53  | 0.85  | 1.27   | 2.12  |
| 0.37 | 101.76   | 184.53   | 322.26   | 643.06    | 0.78 | 0.45  | 0.71  | 1.07   | 1.76  |
| 0.38 | 89.24    | 160.35   | 279.21   | 562.93    | 0.79 | 0.38  | 0.61  | 0.91   | 1.48  |
| 0.39 | 78.66    | 141.25   | 238.72   | 482.39    | 0.80 | 0.32  | 0.50  | 0.74   | 1.21  |
| 0.40 | 68.63    | 122.41   | 211.24   | 420.07    | 0.81 | 0.27  | 0.42  | 0.62   | 0.99  |
| 0.41 | 60.04    | 106.92   | 182.84   | 362.02    | 0.82 | 0.22  | 0.35  | 0.52   | 0.82  |
| 0.42 | 52.69    | 94.14    | 158.80   | 311.24    | 0.83 | 0.18  | 0.29  | 0.42   | 0.66  |
| 0.43 | 46.25    | 81.94    | 138.98   | 271.15    | 0.84 | 0.15  | 0.23  | 0.33   | 0.53  |
| 0.44 | 40.53    | 72.41    | 122.77   | 234.53    | 0.85 | 0.12  | 0.19  | 0.27   | 0.41  |
| 0.45 | 36.16    | 63.57    | 108.23   | 209.78    | 0.86 | 0.10  | 0.15  | 0.21   | 0.32  |
| 0.46 | 31.69    | 55.91    | 95.00    | 185.17    | 0.87 | 0.08  | 0.12  | 0.17   | 0.25  |
| 0.47 | 27.93    | 49.37    | 83.25    | 164.50    | 0.88 | 0.06  | 0.09  | 0.13   | 0.19  |
| 0.48 | 24.55    | 43.46    | 72.86    | 143.53    | 0.89 | 0.05  | 0.07  | 0.09   | 0.14  |
| 0.49 | 21.90    | 38.39    | 64.09    | 126.67    | 0.90 | 0.03  | 0.05  | 0.07   | 0.10  |
| 0.50 | 19.31    | 33.46    | 56.98    | 110.57    |      |       |       |        |       |

Table S288: Critical values for detector  $\hat{H}_{mov}^{m,0.1}$  with windows size  $n = 0.1$ , and FM-OLS and D-OLS estimation in a model with intercept and linear trend. The number of integrated regressors is 4 and the highest power of  $x_{kt}$  is 2.

| m    | 90 %     | 95 %      | 97,5 %    | 99 %      | m    | 90 %  | 95 %  | 97,5 % | 99 %   |
|------|----------|-----------|-----------|-----------|------|-------|-------|--------|--------|
| 0.10 | 54570.15 | 110276.08 | 210066.87 | 469151.32 | 0.51 | 36.79 | 67.82 | 119.88 | 241.88 |
| 0.11 | 38301.52 | 75581.00  | 145410.68 | 329320.80 | 0.52 | 32.46 | 59.99 | 105.10 | 212.08 |
| 0.12 | 27149.77 | 54926.48  | 105062.53 | 236457.37 | 0.53 | 28.46 | 52.82 | 91.80  | 184.25 |
| 0.13 | 19948.12 | 40268.38  | 76957.55  | 168523.02 | 0.54 | 25.42 | 46.17 | 80.38  | 160.55 |
| 0.14 | 14972.65 | 30056.52  | 56256.77  | 127107.28 | 0.55 | 22.39 | 40.75 | 70.33  | 140.72 |
| 0.15 | 11413.22 | 23001.47  | 43602.44  | 97413.43  | 0.56 | 19.82 | 36.02 | 61.73  | 124.91 |
| 0.16 | 8825.28  | 17577.71  | 33233.52  | 74604.55  | 0.57 | 17.42 | 31.70 | 54.47  | 107.71 |
| 0.17 | 6930.88  | 13601.59  | 25836.55  | 57297.19  | 0.58 | 15.29 | 27.81 | 47.69  | 95.07  |
| 0.18 | 5478.01  | 10831.94  | 19868.73  | 44462.81  | 0.59 | 13.47 | 24.35 | 41.39  | 83.81  |
| 0.19 | 4385.29  | 8457.50   | 15864.04  | 35373.20  | 0.60 | 11.93 | 21.38 | 36.50  | 71.14  |
| 0.20 | 3509.36  | 6821.46   | 12593.29  | 27339.56  | 0.61 | 10.47 | 18.75 | 31.96  | 62.62  |
| 0.21 | 2881.14  | 5585.27   | 10098.93  | 21913.71  | 0.62 | 9.21  | 16.57 | 28.11  | 54.01  |
| 0.22 | 2361.93  | 4575.15   | 8271.01   | 17503.32  | 0.63 | 8.14  | 14.57 | 24.48  | 47.47  |
| 0.23 | 1961.03  | 3802.89   | 6911.71   | 14546.62  | 0.64 | 7.16  | 12.70 | 21.33  | 41.30  |
| 0.24 | 1640.78  | 3155.34   | 5785.60   | 12113.83  | 0.65 | 6.32  | 11.20 | 18.47  | 35.07  |
| 0.25 | 1385.82  | 2644.44   | 4901.45   | 10348.53  | 0.66 | 5.53  | 9.70  | 16.03  | 29.67  |
| 0.26 | 1154.46  | 2228.00   | 4113.53   | 8659.49   | 0.67 | 4.85  | 8.44  | 13.87  | 26.05  |
| 0.27 | 974.82   | 1852.99   | 3471.68   | 7598.94   | 0.68 | 4.22  | 7.34  | 11.95  | 22.78  |
| 0.28 | 834.02   | 1561.46   | 2913.86   | 6393.76   | 0.69 | 3.70  | 6.42  | 10.28  | 19.83  |
| 0.29 | 703.88   | 1339.09   | 2461.38   | 5347.64   | 0.70 | 3.23  | 5.62  | 9.06   | 16.83  |
| 0.30 | 605.18   | 1148.00   | 2122.59   | 4562.76   | 0.71 | 2.80  | 4.87  | 7.86   | 14.49  |
| 0.31 | 520.25   | 992.20    | 1818.70   | 3920.52   | 0.72 | 2.42  | 4.20  | 6.82   | 12.41  |
| 0.32 | 448.10   | 849.04    | 1558.91   | 3372.67   | 0.73 | 2.09  | 3.63  | 5.86   | 10.63  |
| 0.33 | 385.93   | 735.22    | 1339.96   | 2857.89   | 0.74 | 1.80  | 3.12  | 4.97   | 9.03   |
| 0.34 | 333.88   | 638.38    | 1176.20   | 2471.51   | 0.75 | 1.55  | 2.64  | 4.25   | 7.68   |
| 0.35 | 293.31   | 561.82    | 1026.79   | 2149.46   | 0.76 | 1.33  | 2.24  | 3.62   | 6.47   |
| 0.36 | 254.82   | 485.45    | 886.52    | 1840.69   | 0.77 | 1.13  | 1.92  | 3.03   | 5.38   |
| 0.37 | 220.53   | 420.47    | 769.57    | 1640.68   | 0.78 | 0.96  | 1.61  | 2.53   | 4.50   |
| 0.38 | 192.38   | 366.59    | 662.82    | 1400.91   | 0.79 | 0.81  | 1.35  | 2.12   | 3.72   |
| 0.39 | 168.34   | 315.56    | 568.43    | 1218.63   | 0.80 | 0.68  | 1.13  | 1.77   | 3.09   |
| 0.40 | 146.43   | 275.26    | 496.17    | 1030.96   | 0.81 | 0.57  | 0.95  | 1.48   | 2.55   |
| 0.41 | 128.65   | 238.47    | 434.28    | 900.89    | 0.82 | 0.48  | 0.78  | 1.23   | 2.04   |
| 0.42 | 112.80   | 210.52    | 376.64    | 773.46    | 0.83 | 0.39  | 0.64  | 0.99   | 1.64   |
| 0.43 | 98.99    | 184.56    | 333.46    | 685.09    | 0.84 | 0.32  | 0.52  | 0.79   | 1.31   |
| 0.44 | 87.37    | 161.81    | 290.18    | 614.41    | 0.85 | 0.26  | 0.42  | 0.63   | 1.02   |
| 0.45 | 76.79    | 141.68    | 254.84    | 546.83    | 0.86 | 0.21  | 0.34  | 0.50   | 0.80   |
| 0.46 | 68.36    | 127.11    | 226.21    | 475.47    | 0.87 | 0.17  | 0.27  | 0.40   | 0.62   |
| 0.47 | 60.57    | 112.66    | 197.34    | 414.79    | 0.88 | 0.13  | 0.21  | 0.31   | 0.47   |
| 0.48 | 53.79    | 98.90     | 173.90    | 357.99    | 0.89 | 0.10  | 0.16  | 0.23   | 0.36   |
| 0.49 | 47.57    | 86.66     | 151.51    | 312.24    | 0.90 | 0.08  | 0.12  | 0.17   | 0.27   |
| 0.50 | 41.62    | 76.58     | 135.51    | 274.48    |      |       |       |        |        |

Table S289: Critical values for detector  $\hat{H}_{mov}^{m,0.1}$  with windows size  $n = 0.1$ , and IM-OLS estimation in a model with intercept and linear trend. The number of integrated regressors is 4 and the highest power of  $x_{kt}$  is 2.

| m    | 90 %     | 95 %     | 97,5 %    | 99 %      | m    | 90 %  | 95 %  | 97,5 % | 99 %   |
|------|----------|----------|-----------|-----------|------|-------|-------|--------|--------|
| 0.10 | 33707.83 | 63964.14 | 116843.49 | 246293.64 | 0.51 | 23.94 | 41.35 | 69.65  | 134.87 |
| 0.11 | 23985.86 | 45499.50 | 83040.62  | 170199.43 | 0.52 | 21.01 | 37.01 | 60.95  | 117.88 |
| 0.12 | 17258.74 | 32832.49 | 59938.90  | 124706.30 | 0.53 | 18.56 | 32.33 | 53.74  | 100.08 |
| 0.13 | 12865.30 | 24470.69 | 44728.05  | 91433.81  | 0.54 | 16.49 | 28.63 | 46.96  | 86.88  |
| 0.14 | 9672.75  | 18105.12 | 33079.62  | 68124.79  | 0.55 | 14.42 | 25.09 | 40.96  | 75.27  |
| 0.15 | 7516.31  | 14199.10 | 25607.81  | 53070.07  | 0.56 | 12.81 | 22.05 | 35.72  | 64.86  |
| 0.16 | 5778.25  | 10890.53 | 19894.89  | 41435.21  | 0.57 | 11.29 | 19.29 | 31.08  | 56.02  |
| 0.17 | 4551.67  | 8424.72  | 15202.03  | 31206.04  | 0.58 | 9.80  | 16.92 | 27.40  | 50.59  |
| 0.18 | 3642.61  | 6839.74  | 12321.99  | 25670.91  | 0.59 | 8.60  | 14.76 | 23.72  | 43.50  |
| 0.19 | 2926.14  | 5428.93  | 9778.91   | 20248.72  | 0.60 | 7.54  | 12.96 | 20.75  | 38.60  |
| 0.20 | 2386.45  | 4402.59  | 7934.74   | 16339.70  | 0.61 | 6.58  | 11.44 | 18.24  | 33.52  |
| 0.21 | 1964.97  | 3650.10  | 6532.12   | 13287.03  | 0.62 | 5.83  | 9.90  | 15.95  | 29.11  |
| 0.22 | 1608.93  | 2981.54  | 5386.76   | 10918.28  | 0.63 | 5.10  | 8.63  | 13.76  | 24.36  |
| 0.23 | 1341.85  | 2484.17  | 4352.11   | 9134.92   | 0.64 | 4.40  | 7.47  | 11.77  | 21.10  |
| 0.24 | 1108.06  | 2059.42  | 3614.60   | 7486.78   | 0.65 | 3.83  | 6.44  | 10.25  | 18.22  |
| 0.25 | 926.66   | 1699.93  | 3046.99   | 6179.49   | 0.66 | 3.33  | 5.61  | 8.94   | 15.79  |
| 0.26 | 777.82   | 1412.59  | 2524.02   | 5255.46   | 0.67 | 2.88  | 4.85  | 7.69   | 13.37  |
| 0.27 | 660.20   | 1199.39  | 2132.01   | 4386.57   | 0.68 | 2.52  | 4.17  | 6.53   | 11.67  |
| 0.28 | 561.71   | 1028.48  | 1799.41   | 3721.44   | 0.69 | 2.18  | 3.58  | 5.67   | 9.87   |
| 0.29 | 479.27   | 871.65   | 1524.26   | 3138.57   | 0.70 | 1.86  | 3.10  | 4.84   | 8.37   |
| 0.30 | 409.89   | 739.39   | 1305.03   | 2713.94   | 0.71 | 1.61  | 2.64  | 4.13   | 7.10   |
| 0.31 | 351.29   | 639.90   | 1124.41   | 2309.85   | 0.72 | 1.39  | 2.28  | 3.53   | 6.00   |
| 0.32 | 303.77   | 553.79   | 975.53    | 1962.86   | 0.73 | 1.18  | 1.94  | 2.99   | 4.95   |
| 0.33 | 261.03   | 477.21   | 830.83    | 1701.62   | 0.74 | 1.01  | 1.64  | 2.50   | 4.17   |
| 0.34 | 227.39   | 411.68   | 725.63    | 1507.64   | 0.75 | 0.86  | 1.37  | 2.10   | 3.49   |
| 0.35 | 196.80   | 357.51   | 622.04    | 1279.68   | 0.76 | 0.73  | 1.17  | 1.74   | 2.86   |
| 0.36 | 171.67   | 309.64   | 538.96    | 1092.88   | 0.77 | 0.61  | 0.97  | 1.45   | 2.38   |
| 0.37 | 149.43   | 269.51   | 467.71    | 922.79    | 0.78 | 0.51  | 0.80  | 1.20   | 1.95   |
| 0.38 | 130.30   | 233.07   | 404.13    | 819.61    | 0.79 | 0.43  | 0.67  | 1.01   | 1.63   |
| 0.39 | 114.86   | 205.38   | 347.28    | 695.68    | 0.80 | 0.35  | 0.55  | 0.81   | 1.31   |
| 0.40 | 100.03   | 177.94   | 303.95    | 601.74    | 0.81 | 0.29  | 0.45  | 0.67   | 1.05   |
| 0.41 | 87.40    | 154.79   | 262.90    | 519.32    | 0.82 | 0.24  | 0.37  | 0.55   | 0.87   |
| 0.42 | 76.62    | 136.16   | 228.42    | 448.90    | 0.83 | 0.20  | 0.30  | 0.44   | 0.69   |
| 0.43 | 67.01    | 118.57   | 198.90    | 388.66    | 0.84 | 0.16  | 0.24  | 0.35   | 0.55   |
| 0.44 | 58.24    | 103.93   | 176.28    | 336.35    | 0.85 | 0.13  | 0.19  | 0.28   | 0.42   |
| 0.45 | 52.01    | 91.29    | 155.05    | 297.84    | 0.86 | 0.10  | 0.15  | 0.22   | 0.32   |
| 0.46 | 45.45    | 80.24    | 135.64    | 262.33    | 0.87 | 0.08  | 0.12  | 0.17   | 0.25   |
| 0.47 | 40.07    | 70.05    | 118.22    | 231.91    | 0.88 | 0.06  | 0.09  | 0.13   | 0.19   |
| 0.48 | 35.04    | 61.81    | 103.18    | 203.04    | 0.89 | 0.05  | 0.07  | 0.10   | 0.14   |
| 0.49 | 31.21    | 54.39    | 91.17     | 178.59    | 0.90 | 0.04  | 0.06  | 0.07   | 0.10   |
| 0.50 | 27.31    | 47.18    | 80.34     | 155.88    |      |       |       |        |        |

Table S290: Critical values for detector  $\hat{H}_{mov}^{m,0.2}$  with windows size  $n = 0.2$ , and FM-OLS and D-OLS estimation in a model with intercept and linear trend. The number of integrated regressors is 4 and the highest power of  $x_{kt}$  is 2.

| m    | 90 %     | 95 %      | 97,5 %    | 99 %      | m    | 90 %  | 95 %  | 97,5 % | 99 %   |
|------|----------|-----------|-----------|-----------|------|-------|-------|--------|--------|
| 0.10 | 73654.60 | 146694.64 | 280665.13 | 633333.13 | 0.51 | 51.84 | 94.89 | 166.93 | 335.54 |
| 0.11 | 52261.82 | 103007.33 | 197987.62 | 450043.32 | 0.52 | 45.42 | 83.67 | 145.07 | 292.93 |
| 0.12 | 37371.66 | 75040.22  | 143786.78 | 321859.41 | 0.53 | 39.84 | 73.39 | 126.82 | 254.07 |
| 0.13 | 27575.28 | 55205.61  | 104894.34 | 231676.39 | 0.54 | 35.36 | 64.19 | 110.39 | 219.68 |
| 0.14 | 20858.36 | 41648.29  | 79041.84  | 178284.84 | 0.55 | 31.10 | 55.86 | 96.73  | 192.89 |
| 0.15 | 15879.03 | 32081.95  | 61332.34  | 135422.17 | 0.56 | 27.19 | 49.13 | 84.30  | 168.62 |
| 0.16 | 12426.40 | 24779.33  | 46791.53  | 104301.42 | 0.57 | 23.88 | 43.18 | 73.73  | 145.22 |
| 0.17 | 9873.80  | 19252.83  | 36335.03  | 81133.06  | 0.58 | 20.82 | 37.82 | 64.29  | 127.82 |
| 0.18 | 7784.30  | 15357.90  | 28380.55  | 63031.95  | 0.59 | 18.30 | 32.89 | 56.02  | 110.40 |
| 0.19 | 6269.31  | 12097.68  | 22503.28  | 50629.86  | 0.60 | 16.11 | 28.70 | 48.94  | 94.44  |
| 0.20 | 5043.12  | 9820.69   | 18107.43  | 38991.23  | 0.61 | 14.05 | 25.01 | 42.32  | 82.61  |
| 0.21 | 4130.69  | 8064.74   | 14592.24  | 31815.69  | 0.62 | 12.33 | 21.92 | 36.84  | 70.86  |
| 0.22 | 3424.14  | 6620.34   | 11962.40  | 25504.14  | 0.63 | 10.78 | 19.17 | 32.13  | 61.99  |
| 0.23 | 2854.33  | 5506.55   | 10062.88  | 20894.05  | 0.64 | 9.40  | 16.62 | 27.68  | 53.12  |
| 0.24 | 2389.86  | 4599.38   | 8442.61   | 17486.29  | 0.65 | 8.22  | 14.59 | 23.77  | 44.98  |
| 0.25 | 2015.29  | 3853.29   | 7104.32   | 14873.43  | 0.66 | 7.14  | 12.50 | 20.44  | 37.62  |
| 0.26 | 1687.55  | 3250.59   | 5985.52   | 12606.48  | 0.67 | 6.20  | 10.80 | 17.52  | 32.60  |
| 0.27 | 1423.50  | 2697.12   | 5037.09   | 11029.33  | 0.68 | 5.38  | 9.29  | 15.01  | 28.37  |
| 0.28 | 1213.83  | 2280.24   | 4242.02   | 9319.79   | 0.69 | 4.67  | 8.04  | 12.89  | 24.44  |
| 0.29 | 1030.77  | 1965.45   | 3615.40   | 7791.74   | 0.70 | 4.04  | 6.97  | 11.14  | 20.74  |
| 0.30 | 884.73   | 1669.93   | 3065.93   | 6655.79   | 0.71 | 3.49  | 5.99  | 9.60   | 17.47  |
| 0.31 | 758.41   | 1448.27   | 2664.34   | 5697.76   | 0.72 | 2.98  | 5.11  | 8.23   | 14.75  |
| 0.32 | 656.88   | 1236.06   | 2274.90   | 4852.93   | 0.73 | 2.54  | 4.37  | 7.02   | 12.48  |
| 0.33 | 563.78   | 1074.98   | 1951.86   | 4143.87   | 0.74 | 2.17  | 3.73  | 5.89   | 10.42  |
| 0.34 | 489.22   | 935.52    | 1711.05   | 3598.01   | 0.75 | 1.85  | 3.11  | 4.94   | 8.87   |
| 0.35 | 428.34   | 819.46    | 1496.73   | 3105.69   | 0.76 | 1.56  | 2.62  | 4.19   | 7.40   |
| 0.36 | 372.22   | 705.21    | 1297.64   | 2659.67   | 0.77 | 1.31  | 2.22  | 3.47   | 6.04   |
| 0.37 | 321.75   | 614.38    | 1112.84   | 2373.92   | 0.78 | 1.10  | 1.83  | 2.85   | 4.97   |
| 0.38 | 280.28   | 534.51    | 961.92    | 2029.82   | 0.79 | 0.91  | 1.52  | 2.35   | 4.08   |
| 0.39 | 243.95   | 457.96    | 822.38    | 1748.87   | 0.80 | 0.76  | 1.25  | 1.96   | 3.36   |
| 0.40 | 211.59   | 399.05    | 722.15    | 1485.71   | 0.81 | 0.63  | 1.04  | 1.61   | 2.75   |
| 0.41 | 186.05   | 345.35    | 623.82    | 1300.99   | 0.82 | 0.52  | 0.85  | 1.31   | 2.18   |
| 0.42 | 162.67   | 304.84    | 543.32    | 1112.47   | 0.83 | 0.42  | 0.69  | 1.05   | 1.72   |
| 0.43 | 143.22   | 267.71    | 479.30    | 978.81    | 0.84 | 0.34  | 0.55  | 0.83   | 1.37   |
| 0.44 | 125.68   | 232.74    | 412.69    | 870.46    | 0.85 | 0.28  | 0.44  | 0.65   | 1.05   |
| 0.45 | 110.19   | 203.56    | 362.22    | 780.64    | 0.86 | 0.22  | 0.35  | 0.51   | 0.82   |
| 0.46 | 97.80    | 181.71    | 321.55    | 673.82    | 0.87 | 0.17  | 0.27  | 0.41   | 0.63   |
| 0.47 | 86.64    | 161.12    | 279.24    | 581.34    | 0.88 | 0.14  | 0.21  | 0.31   | 0.48   |
| 0.48 | 76.48    | 141.37    | 244.32    | 504.73    | 0.89 | 0.10  | 0.16  | 0.23   | 0.37   |
| 0.49 | 67.32    | 122.78    | 212.78    | 439.47    | 0.90 | 0.08  | 0.12  | 0.17   | 0.27   |
| 0.50 | 58.84    | 107.64    | 188.63    | 385.21    |      |       |       |        |        |

Table S291: Critical values for detector  $\hat{H}_{mov}^{m,0.2}$  with windows size  $n = 0.2$ , and IM-OLS estimation in a model with intercept and linear trend. The number of integrated regressors is 4 and the highest power of  $x_{kt}$  is 2.

| m    | 90 %     | 95 %     | 97,5 %    | 99 %      | m    | 90 %  | 95 %  | 97,5 % | 99 %   |
|------|----------|----------|-----------|-----------|------|-------|-------|--------|--------|
| 0.10 | 37270.93 | 70630.12 | 128217.31 | 273847.52 | 0.51 | 26.25 | 45.11 | 75.87  | 146.54 |
| 0.11 | 26682.11 | 50754.33 | 92618.75  | 189779.86 | 0.52 | 22.98 | 40.14 | 66.22  | 126.10 |
| 0.12 | 19256.64 | 36505.17 | 66670.97  | 139297.12 | 0.53 | 20.20 | 35.11 | 57.90  | 106.91 |
| 0.13 | 14425.41 | 27384.00 | 49500.48  | 101916.18 | 0.54 | 17.87 | 30.92 | 50.69  | 92.66  |
| 0.14 | 10859.59 | 20370.60 | 36911.66  | 76625.78  | 0.55 | 15.62 | 27.04 | 43.96  | 79.96  |
| 0.15 | 8441.50  | 15941.53 | 28591.30  | 59220.95  | 0.56 | 13.79 | 23.64 | 38.21  | 68.43  |
| 0.16 | 6539.43  | 12290.64 | 22173.03  | 46552.79  | 0.57 | 12.14 | 20.55 | 33.02  | 59.65  |
| 0.17 | 5148.57  | 9559.58  | 17113.04  | 35357.33  | 0.58 | 10.48 | 17.95 | 29.10  | 53.33  |
| 0.18 | 4133.61  | 7725.37  | 13933.20  | 28764.84  | 0.59 | 9.18  | 15.68 | 25.13  | 45.55  |
| 0.19 | 3335.38  | 6177.62  | 11000.58  | 22894.15  | 0.60 | 8.01  | 13.72 | 21.90  | 40.45  |
| 0.20 | 2713.57  | 4996.88  | 8972.21   | 18474.90  | 0.61 | 6.95  | 12.02 | 19.16  | 35.09  |
| 0.21 | 2242.86  | 4140.40  | 7390.37   | 15026.47  | 0.62 | 6.13  | 10.36 | 16.61  | 30.41  |
| 0.22 | 1831.43  | 3388.48  | 6107.15   | 12279.26  | 0.63 | 5.34  | 8.99  | 14.30  | 25.24  |
| 0.23 | 1535.20  | 2812.26  | 4935.73   | 10246.83  | 0.64 | 4.60  | 7.75  | 12.25  | 21.77  |
| 0.24 | 1267.54  | 2341.57  | 4086.13   | 8469.84   | 0.65 | 3.98  | 6.66  | 10.59  | 18.68  |
| 0.25 | 1060.87  | 1936.98  | 3453.94   | 6935.13   | 0.66 | 3.45  | 5.79  | 9.19   | 16.22  |
| 0.26 | 888.41   | 1611.37  | 2840.73   | 5953.65   | 0.67 | 2.97  | 4.99  | 7.88   | 13.66  |
| 0.27 | 751.99   | 1362.90  | 2421.65   | 4979.90   | 0.68 | 2.59  | 4.26  | 6.68   | 11.90  |
| 0.28 | 640.87   | 1167.71  | 2039.52   | 4236.32   | 0.69 | 2.23  | 3.66  | 5.78   | 10.02  |
| 0.29 | 543.66   | 986.93   | 1727.64   | 3573.22   | 0.70 | 1.90  | 3.15  | 4.91   | 8.44   |
| 0.30 | 467.40   | 841.86   | 1481.74   | 3082.08   | 0.71 | 1.64  | 2.68  | 4.18   | 7.15   |
| 0.31 | 399.35   | 727.01   | 1273.50   | 2617.87   | 0.72 | 1.40  | 2.30  | 3.56   | 6.05   |
| 0.32 | 345.74   | 629.15   | 1105.93   | 2199.81   | 0.73 | 1.20  | 1.96  | 3.01   | 4.99   |
| 0.33 | 297.72   | 541.59   | 942.73    | 1927.65   | 0.74 | 1.02  | 1.65  | 2.52   | 4.18   |
| 0.34 | 258.72   | 465.96   | 818.47    | 1700.26   | 0.75 | 0.87  | 1.38  | 2.11   | 3.50   |
| 0.35 | 222.82   | 406.04   | 699.82    | 1426.43   | 0.76 | 0.74  | 1.17  | 1.75   | 2.87   |
| 0.36 | 194.85   | 349.19   | 606.11    | 1215.60   | 0.77 | 0.61  | 0.97  | 1.45   | 2.38   |
| 0.37 | 168.71   | 304.68   | 522.94    | 1030.81   | 0.78 | 0.51  | 0.80  | 1.20   | 1.95   |
| 0.38 | 146.84   | 263.60   | 453.00    | 915.35    | 0.79 | 0.43  | 0.67  | 1.01   | 1.63   |
| 0.39 | 129.49   | 231.00   | 390.49    | 766.78    | 0.80 | 0.35  | 0.55  | 0.81   | 1.31   |
| 0.40 | 112.71   | 200.02   | 339.30    | 666.58    | 0.81 | 0.29  | 0.46  | 0.67   | 1.05   |
| 0.41 | 97.96    | 173.60   | 293.15    | 574.31    | 0.82 | 0.24  | 0.38  | 0.55   | 0.87   |
| 0.42 | 86.17    | 151.91   | 255.30    | 497.66    | 0.83 | 0.20  | 0.31  | 0.44   | 0.70   |
| 0.43 | 74.94    | 132.11   | 220.52    | 431.11    | 0.84 | 0.16  | 0.24  | 0.35   | 0.55   |
| 0.44 | 64.96    | 115.59   | 194.70    | 368.42    | 0.85 | 0.13  | 0.20  | 0.28   | 0.43   |
| 0.45 | 57.84    | 101.55   | 170.29    | 327.55    | 0.86 | 0.11  | 0.16  | 0.22   | 0.33   |
| 0.46 | 50.50    | 89.06    | 150.74    | 289.02    | 0.87 | 0.08  | 0.12  | 0.17   | 0.26   |
| 0.47 | 44.47    | 77.52    | 130.19    | 252.75    | 0.88 | 0.07  | 0.10  | 0.13   | 0.20   |
| 0.48 | 38.68    | 68.28    | 113.15    | 219.43    | 0.89 | 0.05  | 0.08  | 0.10   | 0.14   |
| 0.49 | 34.44    | 59.71    | 99.46     | 194.41    | 0.90 | 0.04  | 0.06  | 0.08   | 0.11   |
| 0.50 | 30.02    | 51.41    | 87.83     | 168.83    |      |       |       |        |        |

Table S292: Critical values for detector  $\hat{H}_{mov}^{m,0.3}$  with windows size  $n = 0.3$ , and FM-OLS and D-OLS estimation in a model with intercept and linear trend. The number of integrated regressors is 4 and the highest power of  $x_{kt}$  is 2.

| m    | 90 %     | 95 %      | 97,5 %    | 99 %      | m    | 90 %  | 95 %   | 97,5 % | 99 %   |
|------|----------|-----------|-----------|-----------|------|-------|--------|--------|--------|
| 0.10 | 81185.67 | 161411.75 | 306942.07 | 700654.35 | 0.51 | 56.76 | 103.83 | 181.95 | 363.20 |
| 0.11 | 57863.52 | 113979.95 | 217676.85 | 500597.06 | 0.52 | 49.61 | 91.29  | 157.18 | 312.66 |
| 0.12 | 41689.02 | 83234.44  | 157983.43 | 352502.43 | 0.53 | 43.50 | 79.97  | 136.53 | 271.94 |
| 0.13 | 30787.63 | 61445.92  | 116611.86 | 258477.90 | 0.54 | 38.41 | 69.33  | 118.56 | 235.53 |
| 0.14 | 23406.05 | 46389.04  | 87754.11  | 198493.16 | 0.55 | 33.56 | 60.13  | 103.87 | 206.10 |
| 0.15 | 17889.54 | 35924.91  | 68371.88  | 151536.26 | 0.56 | 29.32 | 52.53  | 89.99  | 179.47 |
| 0.16 | 14006.90 | 27771.47  | 52120.97  | 117260.87 | 0.57 | 25.55 | 46.33  | 78.74  | 153.44 |
| 0.17 | 11119.26 | 21641.26  | 40607.54  | 91054.98  | 0.58 | 22.24 | 40.28  | 68.21  | 135.71 |
| 0.18 | 8790.96  | 17282.84  | 31736.29  | 70793.85  | 0.59 | 19.50 | 34.93  | 59.14  | 115.50 |
| 0.19 | 7126.19  | 13708.86  | 25266.73  | 56140.49  | 0.60 | 17.10 | 30.29  | 51.64  | 98.15  |
| 0.20 | 5717.07  | 11064.84  | 20377.22  | 43687.19  | 0.61 | 14.85 | 26.37  | 44.63  | 86.20  |
| 0.21 | 4699.60  | 9127.34   | 16433.55  | 35817.35  | 0.62 | 13.00 | 22.97  | 38.52  | 74.41  |
| 0.22 | 3886.33  | 7517.93   | 13575.27  | 28636.48  | 0.63 | 11.34 | 19.97  | 33.45  | 64.48  |
| 0.23 | 3240.75  | 6224.42   | 11394.50  | 23547.72  | 0.64 | 9.82  | 17.31  | 28.81  | 54.79  |
| 0.24 | 2725.65  | 5210.60   | 9549.44   | 19820.57  | 0.65 | 8.54  | 15.14  | 24.58  | 46.45  |
| 0.25 | 2290.93  | 4364.35   | 8015.04   | 16931.19  | 0.66 | 7.40  | 12.89  | 21.09  | 38.62  |
| 0.26 | 1921.59  | 3697.19   | 6760.75   | 14313.95  | 0.67 | 6.40  | 11.11  | 17.96  | 33.31  |
| 0.27 | 1620.50  | 3054.83   | 5652.01   | 12416.13  | 0.68 | 5.54  | 9.53   | 15.38  | 29.03  |
| 0.28 | 1382.53  | 2602.44   | 4829.90   | 10546.01  | 0.69 | 4.79  | 8.21   | 13.12  | 24.84  |
| 0.29 | 1172.97  | 2239.03   | 4096.12   | 8746.18   | 0.70 | 4.12  | 7.11   | 11.30  | 21.02  |
| 0.30 | 1007.52  | 1892.74   | 3479.27   | 7510.91   | 0.71 | 3.55  | 6.09   | 9.72   | 17.63  |
| 0.31 | 861.83   | 1639.57   | 3009.05   | 6388.59   | 0.72 | 3.02  | 5.18   | 8.32   | 14.92  |
| 0.32 | 744.43   | 1400.70   | 2580.24   | 5523.37   | 0.73 | 2.57  | 4.42   | 7.09   | 12.56  |
| 0.33 | 638.88   | 1220.79   | 2199.91   | 4651.42   | 0.74 | 2.19  | 3.75   | 5.92   | 10.46  |
| 0.34 | 554.34   | 1057.46   | 1926.50   | 4034.36   | 0.75 | 1.86  | 3.13   | 4.95   | 8.90   |
| 0.35 | 484.30   | 922.37    | 1686.48   | 3490.39   | 0.76 | 1.57  | 2.63   | 4.20   | 7.42   |
| 0.36 | 418.84   | 794.66    | 1462.06   | 2973.67   | 0.77 | 1.32  | 2.22   | 3.47   | 6.05   |
| 0.37 | 363.85   | 695.25    | 1245.94   | 2622.46   | 0.78 | 1.10  | 1.84   | 2.85   | 4.98   |
| 0.38 | 317.09   | 601.51    | 1072.23   | 2271.57   | 0.79 | 0.91  | 1.53   | 2.35   | 4.08   |
| 0.39 | 273.58   | 514.71    | 922.92    | 1969.85   | 0.80 | 0.76  | 1.25   | 1.96   | 3.36   |
| 0.40 | 237.95   | 447.31    | 807.96    | 1661.22   | 0.81 | 0.63  | 1.04   | 1.61   | 2.75   |
| 0.41 | 209.27   | 387.71    | 697.54    | 1440.67   | 0.82 | 0.52  | 0.85   | 1.31   | 2.18   |
| 0.42 | 181.88   | 339.57    | 607.48    | 1223.92   | 0.83 | 0.42  | 0.69   | 1.05   | 1.72   |
| 0.43 | 160.31   | 298.72    | 530.30    | 1079.85   | 0.84 | 0.34  | 0.55   | 0.83   | 1.38   |
| 0.44 | 139.92   | 259.02    | 459.25    | 952.24    | 0.85 | 0.28  | 0.44   | 0.66   | 1.05   |
| 0.45 | 122.77   | 225.74    | 398.87    | 859.07    | 0.86 | 0.22  | 0.35   | 0.52   | 0.82   |
| 0.46 | 108.84   | 200.49    | 353.82    | 740.54    | 0.87 | 0.18  | 0.27   | 0.41   | 0.63   |
| 0.47 | 95.38    | 177.17    | 306.18    | 638.04    | 0.88 | 0.14  | 0.21   | 0.31   | 0.48   |
| 0.48 | 84.22    | 155.82    | 268.37    | 549.46    | 0.89 | 0.11  | 0.16   | 0.23   | 0.37   |
| 0.49 | 74.06    | 134.62    | 232.53    | 480.10    | 0.90 | 0.08  | 0.12   | 0.18   | 0.28   |
| 0.50 | 64.69    | 117.70    | 205.72    | 420.76    |      |       |        |        |        |

Table S293: Critical values for detector  $\hat{H}_{mov}^{m,0.3}$  with windows size  $n = 0.3$ , and IM-OLS estimation in a model with intercept and linear trend. The number of integrated regressors is 4 and the highest power of  $x_{kt}$  is 2.

| m    | 90 %      | 95 %       | 97,5 %     | 99 %        | m    | 90 %  | 95 %   | 97,5 % | 99 %    |
|------|-----------|------------|------------|-------------|------|-------|--------|--------|---------|
| 0.10 | 793876.47 | 2862665.82 | 8515022.19 | 27523564.84 | 0.51 | 76.13 | 267.28 | 757.47 | 2250.78 |
| 0.11 | 519059.60 | 1891940.56 | 5507889.02 | 17644891.95 | 0.52 | 64.64 | 225.14 | 635.78 | 1880.47 |
| 0.12 | 354893.12 | 1277831.58 | 3699858.55 | 12259231.19 | 0.53 | 55.64 | 191.47 | 537.96 | 1648.91 |
| 0.13 | 239468.25 | 867623.10  | 2535781.73 | 8448304.07  | 0.54 | 47.02 | 161.44 | 456.11 | 1390.28 |
| 0.14 | 169822.83 | 610288.14  | 1805145.03 | 5969814.03  | 0.55 | 39.23 | 135.63 | 371.82 | 1166.64 |
| 0.15 | 120270.70 | 435363.64  | 1301576.62 | 4295571.70  | 0.56 | 33.18 | 113.90 | 314.84 | 954.05  |
| 0.16 | 88202.38  | 316026.28  | 945424.93  | 3100027.47  | 0.57 | 27.94 | 94.76  | 259.11 | 813.47  |
| 0.17 | 65202.92  | 229475.49  | 688711.37  | 2244234.33  | 0.58 | 23.47 | 78.83  | 216.92 | 670.31  |
| 0.18 | 48496.47  | 169800.02  | 496651.60  | 1640475.38  | 0.59 | 19.73 | 66.92  | 179.86 | 558.10  |
| 0.19 | 37918.59  | 132341.69  | 386142.33  | 1259282.08  | 0.60 | 16.89 | 55.32  | 151.87 | 482.46  |
| 0.20 | 29226.52  | 103825.46  | 301184.87  | 972506.60   | 0.61 | 14.36 | 47.85  | 124.93 | 399.06  |
| 0.21 | 22918.75  | 80737.64   | 233430.56  | 758566.98   | 0.62 | 11.88 | 39.40  | 105.61 | 329.70  |
| 0.22 | 18227.07  | 63397.95   | 187821.28  | 601178.89   | 0.63 | 10.12 | 33.54  | 88.05  | 264.72  |
| 0.23 | 14246.75  | 51040.63   | 146408.98  | 480761.26   | 0.64 | 8.59  | 28.22  | 72.27  | 221.57  |
| 0.24 | 11486.11  | 41367.76   | 118718.33  | 369063.08   | 0.65 | 7.27  | 23.52  | 60.42  | 177.02  |
| 0.25 | 9135.19   | 32282.22   | 93661.95   | 286244.84   | 0.66 | 6.16  | 19.22  | 51.98  | 154.63  |
| 0.26 | 7284.66   | 26159.26   | 73725.04   | 230954.54   | 0.67 | 5.07  | 16.08  | 42.78  | 122.37  |
| 0.27 | 5791.22   | 21343.32   | 59886.01   | 185060.88   | 0.68 | 4.29  | 13.41  | 35.44  | 105.22  |
| 0.28 | 4694.89   | 16784.21   | 48892.75   | 151004.80   | 0.69 | 3.62  | 10.96  | 28.83  | 85.50   |
| 0.29 | 3838.44   | 13922.47   | 39313.70   | 125022.57   | 0.70 | 2.99  | 9.02   | 23.36  | 70.73   |
| 0.30 | 3048.47   | 11257.96   | 31546.42   | 100175.00   | 0.71 | 2.50  | 7.49   | 19.44  | 58.22   |
| 0.31 | 2522.17   | 9324.15    | 26362.84   | 82348.23    | 0.72 | 2.06  | 6.10   | 15.88  | 47.24   |
| 0.32 | 2085.00   | 7574.38    | 21824.98   | 68111.89    | 0.73 | 1.73  | 4.99   | 12.91  | 37.44   |
| 0.33 | 1719.05   | 6341.59    | 17888.05   | 56387.92    | 0.74 | 1.43  | 4.08   | 10.55  | 29.56   |
| 0.34 | 1425.07   | 5050.70    | 14897.47   | 46107.28    | 0.75 | 1.19  | 3.33   | 8.33   | 24.10   |
| 0.35 | 1184.21   | 4265.95    | 12428.35   | 38567.71    | 0.76 | 0.99  | 2.76   | 6.74   | 18.84   |
| 0.36 | 975.69    | 3524.36    | 10212.18   | 31854.96    | 0.77 | 0.81  | 2.16   | 5.38   | 15.28   |
| 0.37 | 823.31    | 2944.09    | 8527.91    | 26817.47    | 0.78 | 0.66  | 1.71   | 4.09   | 11.67   |
| 0.38 | 706.85    | 2450.17    | 7146.78    | 22472.50    | 0.79 | 0.55  | 1.36   | 3.22   | 8.83    |
| 0.39 | 588.56    | 2073.12    | 5979.19    | 18493.40    | 0.80 | 0.44  | 1.09   | 2.53   | 7.01    |
| 0.40 | 480.14    | 1745.43    | 4986.48    | 15697.35    | 0.81 | 0.36  | 0.86   | 2.00   | 5.26    |
| 0.41 | 407.85    | 1473.28    | 4128.97    | 13138.00    | 0.82 | 0.30  | 0.67   | 1.53   | 3.99    |
| 0.42 | 340.59    | 1205.26    | 3437.99    | 11004.11    | 0.83 | 0.24  | 0.52   | 1.17   | 3.05    |
| 0.43 | 282.10    | 1025.59    | 2958.03    | 9328.82     | 0.84 | 0.19  | 0.40   | 0.87   | 2.19    |
| 0.44 | 236.38    | 847.80     | 2426.65    | 7740.68     | 0.85 | 0.15  | 0.31   | 0.66   | 1.59    |
| 0.45 | 202.87    | 722.68     | 2088.15    | 6481.31     | 0.86 | 0.12  | 0.23   | 0.47   | 1.14    |
| 0.46 | 175.29    | 612.08     | 1724.47    | 5514.87     | 0.87 | 0.09  | 0.17   | 0.35   | 0.84    |
| 0.47 | 148.14    | 514.89     | 1466.63    | 4722.74     | 0.88 | 0.07  | 0.13   | 0.24   | 0.57    |
| 0.48 | 125.42    | 441.41     | 1242.10    | 3883.34     | 0.89 | 0.05  | 0.09   | 0.17   | 0.38    |
| 0.49 | 106.93    | 371.60     | 1036.63    | 3364.39     | 0.90 | 0.04  | 0.07   | 0.12   | 0.25    |
| 0.50 | 89.55     | 310.22     | 882.03     | 2718.26     |      |       |        |        |         |

Table S294: Critical values for detector  $\hat{H}_{mov}^{m,0.1}$  with windows size  $n = 0.1$ , and FM-OLS and D-OLS estimation in a model with intercept. The number of integrated regressors is 4 and the highest power of  $x_{kt}$  is 3.

| m    | 90 %       | 95 %       | 97,5 %      | 99 %         | m    | 90 %   | 95 %   | 97,5 %  | 99 %    |
|------|------------|------------|-------------|--------------|------|--------|--------|---------|---------|
| 0.10 | 2468829.10 | 9658301.36 | 29741494.51 | 105981846.84 | 0.51 | 231.22 | 852.81 | 2511.04 | 8437.83 |
| 0.11 | 1608193.53 | 6109125.34 | 18751540.79 | 67371274.35  | 0.52 | 198.76 | 718.24 | 2133.50 | 7083.37 |
| 0.12 | 1092257.74 | 4165256.49 | 12507699.80 | 45538215.68  | 0.53 | 166.67 | 604.14 | 1742.36 | 5906.07 |
| 0.13 | 736108.90  | 2882469.19 | 8973072.79  | 34951546.28  | 0.54 | 143.04 | 507.56 | 1471.66 | 5032.36 |
| 0.14 | 532772.03  | 2098950.28 | 6473445.83  | 22798663.24  | 0.55 | 121.63 | 426.91 | 1235.06 | 4051.78 |
| 0.15 | 372055.51  | 1468096.45 | 4620665.81  | 16216067.64  | 0.56 | 101.41 | 365.32 | 1050.46 | 3492.08 |
| 0.16 | 278342.23  | 1071243.66 | 3450539.70  | 11346555.74  | 0.57 | 84.57  | 311.88 | 894.52  | 3022.57 |
| 0.17 | 207978.70  | 812125.37  | 2571421.76  | 8533293.82   | 0.58 | 71.27  | 261.52 | 757.90  | 2537.01 |
| 0.18 | 153398.34  | 610058.62  | 1842688.20  | 6269775.35   | 0.59 | 59.81  | 222.82 | 643.97  | 2097.28 |
| 0.19 | 116494.53  | 444484.63  | 1426463.78  | 4913787.63   | 0.60 | 50.20  | 190.89 | 538.62  | 1778.94 |
| 0.20 | 90076.30   | 348586.14  | 1071029.95  | 3781185.54   | 0.61 | 42.63  | 156.92 | 454.28  | 1473.00 |
| 0.21 | 70098.62   | 265671.61  | 843942.13   | 3081137.07   | 0.62 | 35.86  | 130.29 | 375.16  | 1195.64 |
| 0.22 | 55177.77   | 206163.05  | 627868.43   | 2315348.18   | 0.63 | 30.72  | 107.23 | 313.94  | 1000.21 |
| 0.23 | 42814.83   | 162919.12  | 492568.44   | 1783489.62   | 0.64 | 25.86  | 90.53  | 265.14  | 834.80  |
| 0.24 | 34011.59   | 129554.97  | 399505.91   | 1433512.01   | 0.65 | 21.59  | 75.40  | 218.59  | 714.21  |
| 0.25 | 26126.85   | 101664.13  | 312618.04   | 1121830.80   | 0.66 | 18.18  | 63.10  | 179.51  | 576.03  |
| 0.26 | 21213.18   | 81436.38   | 242418.65   | 885918.32    | 0.67 | 15.29  | 52.78  | 146.25  | 473.02  |
| 0.27 | 17197.38   | 66790.23   | 197141.77   | 730572.83    | 0.68 | 12.58  | 43.63  | 120.23  | 391.66  |
| 0.28 | 14102.94   | 54842.38   | 167554.54   | 602431.03    | 0.69 | 10.56  | 36.58  | 101.57  | 311.89  |
| 0.29 | 11676.96   | 44835.24   | 136257.51   | 487117.48    | 0.70 | 8.79   | 29.70  | 81.60   | 251.47  |
| 0.30 | 9470.13    | 36509.00   | 112184.71   | 375734.70    | 0.71 | 7.37   | 24.08  | 66.34   | 198.42  |
| 0.31 | 7651.33    | 29625.49   | 89659.65    | 309984.30    | 0.72 | 6.04   | 19.79  | 54.39   | 166.45  |
| 0.32 | 6471.54    | 24215.45   | 74785.72    | 256899.39    | 0.73 | 5.01   | 16.39  | 44.57   | 136.29  |
| 0.33 | 5350.09    | 20201.37   | 62987.60    | 208157.20    | 0.74 | 4.09   | 13.16  | 35.65   | 112.68  |
| 0.34 | 4400.67    | 17148.61   | 52542.91    | 175010.01    | 0.75 | 3.36   | 10.68  | 29.13   | 87.55   |
| 0.35 | 3617.97    | 13960.05   | 42078.72    | 145429.47    | 0.76 | 2.72   | 8.47   | 23.02   | 70.37   |
| 0.36 | 3019.58    | 11577.40   | 35235.11    | 119422.38    | 0.77 | 2.25   | 6.74   | 18.27   | 52.68   |
| 0.37 | 2529.71    | 9702.89    | 29295.09    | 99708.96     | 0.78 | 1.82   | 5.39   | 14.30   | 42.20   |
| 0.38 | 2120.13    | 8064.55    | 23833.32    | 86620.82     | 0.79 | 1.47   | 4.31   | 11.18   | 33.21   |
| 0.39 | 1758.88    | 6679.06    | 20174.67    | 72368.07     | 0.80 | 1.19   | 3.39   | 8.80    | 25.31   |
| 0.40 | 1481.74    | 5560.68    | 17149.72    | 59034.00     | 0.81 | 0.96   | 2.66   | 6.81    | 19.73   |
| 0.41 | 1228.51    | 4662.06    | 14216.21    | 49873.67     | 0.82 | 0.77   | 2.08   | 5.28    | 15.10   |
| 0.42 | 1011.18    | 3825.18    | 12210.53    | 41838.21     | 0.83 | 0.62   | 1.58   | 3.98    | 11.58   |
| 0.43 | 846.46     | 3256.82    | 10025.86    | 34788.17     | 0.84 | 0.49   | 1.20   | 2.99    | 8.61    |
| 0.44 | 713.30     | 2687.44    | 8172.33     | 28543.17     | 0.85 | 0.38   | 0.91   | 2.27    | 6.23    |
| 0.45 | 605.54     | 2279.50    | 6979.18     | 24287.56     | 0.86 | 0.30   | 0.70   | 1.64    | 4.31    |
| 0.46 | 516.11     | 1938.37    | 5966.10     | 20159.54     | 0.87 | 0.23   | 0.52   | 1.17    | 3.07    |
| 0.47 | 437.58     | 1618.21    | 4878.58     | 16820.33     | 0.88 | 0.18   | 0.39   | 0.83    | 2.17    |
| 0.48 | 377.41     | 1383.55    | 4013.89     | 14339.95     | 0.89 | 0.13   | 0.28   | 0.58    | 1.49    |
| 0.49 | 317.12     | 1170.51    | 3472.51     | 11942.19     | 0.90 | 0.10   | 0.19   | 0.40    | 0.98    |
| 0.50 | 275.18     | 1000.13    | 2973.04     | 10055.83     |      |        |        |         |         |

Table S295: Critical values for detector  $\hat{H}_{mov}^{m,0.1}$  with windows size  $n = 0.1$ , and IM-OLS estimation in a model with intercept. The number of integrated regressors is 4 and the highest power of  $x_{kt}$  is 3.



| m    | 90 %       | 95 %       | 97,5 %      | 99 %        | m    | 90 %   | 95 %   | 97,5 %  | 99 %    |
|------|------------|------------|-------------|-------------|------|--------|--------|---------|---------|
| 0.10 | 1180987.86 | 4268920.42 | 12817002.94 | 41264292.90 | 0.51 | 103.54 | 357.47 | 1005.56 | 2973.44 |
| 0.11 | 769276.32  | 2813520.00 | 8265648.87  | 26776304.02 | 0.52 | 86.91  | 300.12 | 836.68  | 2422.83 |
| 0.12 | 523850.19  | 1886836.19 | 5512359.00  | 18303171.12 | 0.53 | 74.04  | 256.12 | 713.51  | 2152.50 |
| 0.13 | 356602.71  | 1292984.53 | 3794917.33  | 12618993.36 | 0.54 | 62.71  | 212.71 | 600.16  | 1776.23 |
| 0.14 | 250561.39  | 903666.75  | 2695038.48  | 8911838.94  | 0.55 | 51.65  | 176.81 | 485.42  | 1494.97 |
| 0.15 | 177830.50  | 647207.49  | 1957241.15  | 6466803.76  | 0.56 | 43.96  | 147.90 | 411.51  | 1246.65 |
| 0.16 | 130283.25  | 466909.88  | 1402858.61  | 4664834.75  | 0.57 | 36.88  | 122.84 | 334.78  | 1011.46 |
| 0.17 | 96541.74   | 340209.80  | 1028726.53  | 3321447.49  | 0.58 | 30.82  | 101.09 | 277.54  | 850.10  |
| 0.18 | 70565.49   | 251437.45  | 742004.45   | 2448171.13  | 0.59 | 25.75  | 85.94  | 228.13  | 702.12  |
| 0.19 | 55728.71   | 195718.23  | 566603.22   | 1867371.29  | 0.60 | 21.84  | 70.85  | 187.59  | 595.01  |
| 0.20 | 42848.56   | 152546.95  | 445231.03   | 1443200.98  | 0.61 | 18.60  | 60.30  | 156.37  | 494.07  |
| 0.21 | 33455.97   | 118993.18  | 343424.60   | 1113845.20  | 0.62 | 15.33  | 49.44  | 130.85  | 412.25  |
| 0.22 | 26621.54   | 93471.51   | 273199.89   | 870284.32   | 0.63 | 12.83  | 41.57  | 108.22  | 327.80  |
| 0.23 | 20712.27   | 74977.09   | 215110.32   | 701921.87   | 0.64 | 10.87  | 34.82  | 88.85   | 266.92  |
| 0.24 | 16817.51   | 60060.03   | 172382.38   | 546996.32   | 0.65 | 9.19   | 29.01  | 72.97   | 213.91  |
| 0.25 | 13247.70   | 47461.13   | 137738.21   | 420162.35   | 0.66 | 7.62   | 23.45  | 63.20   | 186.47  |
| 0.26 | 10539.92   | 37866.50   | 107483.10   | 333990.91   | 0.67 | 6.28   | 19.52  | 51.08   | 144.54  |
| 0.27 | 8427.48    | 30742.80   | 87495.73    | 268327.67   | 0.68 | 5.33   | 16.06  | 42.04   | 122.02  |
| 0.28 | 6772.34    | 24340.83   | 71712.08    | 219934.26   | 0.69 | 4.46   | 13.01  | 34.27   | 98.14   |
| 0.29 | 5508.95    | 20031.45   | 57029.25    | 179998.08   | 0.70 | 3.62   | 10.61  | 27.24   | 80.61   |
| 0.30 | 4381.21    | 16150.35   | 45595.39    | 144166.30   | 0.71 | 3.01   | 8.73   | 22.37   | 65.41   |
| 0.31 | 3634.60    | 13370.72   | 37882.83    | 120007.94   | 0.72 | 2.45   | 7.07   | 18.16   | 53.06   |
| 0.32 | 2987.41    | 10981.12   | 30989.38    | 98245.15    | 0.73 | 2.05   | 5.77   | 14.46   | 41.60   |
| 0.33 | 2470.48    | 9123.12    | 25547.02    | 80848.92    | 0.74 | 1.68   | 4.64   | 11.79   | 32.45   |
| 0.34 | 2017.26    | 7262.90    | 21101.85    | 65980.15    | 0.75 | 1.37   | 3.75   | 9.31    | 26.31   |
| 0.35 | 1682.56    | 6049.92    | 17519.57    | 55901.51    | 0.76 | 1.14   | 3.05   | 7.42    | 20.24   |
| 0.36 | 1378.73    | 4998.22    | 14596.45    | 45552.83    | 0.77 | 0.92   | 2.39   | 5.80    | 16.23   |
| 0.37 | 1166.14    | 4136.35    | 12208.72    | 38281.55    | 0.78 | 0.75   | 1.87   | 4.44    | 12.46   |
| 0.38 | 991.12     | 3456.73    | 9996.22     | 31637.57    | 0.79 | 0.61   | 1.48   | 3.42    | 9.22    |
| 0.39 | 831.39     | 2902.21    | 8365.84     | 26243.01    | 0.80 | 0.49   | 1.16   | 2.67    | 7.33    |
| 0.40 | 673.12     | 2442.10    | 6959.03     | 21847.52    | 0.81 | 0.39   | 0.90   | 2.08    | 5.46    |
| 0.41 | 568.06     | 2052.97    | 5789.60     | 18306.63    | 0.82 | 0.32   | 0.71   | 1.60    | 4.10    |
| 0.42 | 475.90     | 1673.50    | 4787.33     | 14945.95    | 0.83 | 0.25   | 0.54   | 1.20    | 3.13    |
| 0.43 | 391.81     | 1416.67    | 4050.90     | 12791.06    | 0.84 | 0.20   | 0.41   | 0.89    | 2.23    |
| 0.44 | 327.34     | 1170.67    | 3394.84     | 10497.41    | 0.85 | 0.16   | 0.31   | 0.67    | 1.60    |
| 0.45 | 279.44     | 987.74     | 2851.15     | 8886.88     | 0.86 | 0.12   | 0.24   | 0.48    | 1.15    |
| 0.46 | 239.13     | 834.43     | 2352.31     | 7348.42     | 0.87 | 0.09   | 0.17   | 0.35    | 0.85    |
| 0.47 | 201.77     | 704.07     | 1989.65     | 6240.93     | 0.88 | 0.07   | 0.13   | 0.25    | 0.57    |
| 0.48 | 171.91     | 597.27     | 1674.91     | 5253.48     | 0.89 | 0.06   | 0.09   | 0.17    | 0.39    |
| 0.49 | 144.90     | 499.86     | 1398.46     | 4498.83     | 0.90 | 0.04   | 0.07   | 0.12    | 0.25    |
| 0.50 | 121.35     | 415.23     | 1173.64     | 3611.73     |      |        |        |         |         |

Table S296: Critical values for detector  $\hat{H}_{mov}^{m,0.2}$  with windows size  $n = 0.2$ , and FM-OLS and D-OLS estimation in a model with intercept. The number of integrated regressors is 4 and the highest power of  $x_{kt}$  is 3.

| m    | 90 %       | 95 %        | 97,5 %      | 99 %         | m    | 90 %   | 95 %    | 97,5 %  | 99 %     |
|------|------------|-------------|-------------|--------------|------|--------|---------|---------|----------|
| 0.10 | 3671170.29 | 14362517.68 | 44077422.33 | 161646689.01 | 0.51 | 312.52 | 1139.85 | 3313.25 | 11013.83 |
| 0.11 | 2379819.41 | 9066097.75  | 28189855.44 | 101239644.33 | 0.52 | 266.72 | 965.28  | 2787.19 | 9280.19  |
| 0.12 | 1604881.38 | 6208620.64  | 18925533.76 | 69385651.11  | 0.53 | 221.25 | 797.95  | 2309.66 | 7780.26  |
| 0.13 | 1082508.60 | 4267504.47  | 13376909.33 | 52045523.25  | 0.54 | 189.46 | 671.33  | 1915.92 | 6563.10  |
| 0.14 | 789009.74  | 3102677.11  | 9673143.92  | 34776161.86  | 0.55 | 160.12 | 558.68  | 1600.35 | 5163.47  |
| 0.15 | 551061.89  | 2181327.91  | 6892377.01  | 23971541.10  | 0.56 | 134.12 | 472.27  | 1358.19 | 4494.93  |
| 0.16 | 407368.83  | 1588523.13  | 5117773.60  | 17289067.29  | 0.57 | 111.33 | 403.59  | 1158.46 | 3791.00  |
| 0.17 | 304663.86  | 1200015.99  | 3846254.18  | 12632649.17  | 0.58 | 92.70  | 338.26  | 968.46  | 3159.50  |
| 0.18 | 226123.48  | 897153.10   | 2756394.95  | 9396086.33   | 0.59 | 78.45  | 282.66  | 817.64  | 2642.65  |
| 0.19 | 170865.50  | 656617.21   | 2095539.21  | 7155767.05   | 0.60 | 64.34  | 240.76  | 683.35  | 2245.05  |
| 0.20 | 131268.10  | 512823.86   | 1580681.18  | 5605475.31   | 0.61 | 54.51  | 199.87  | 577.18  | 1824.07  |
| 0.21 | 101743.98  | 387917.89   | 1237637.91  | 4549195.69   | 0.62 | 45.76  | 163.89  | 470.18  | 1472.91  |
| 0.22 | 80414.09   | 300789.71   | 922149.31   | 3432177.60   | 0.63 | 38.70  | 133.76  | 387.41  | 1237.91  |
| 0.23 | 62561.50   | 238265.58   | 720551.14   | 2594588.41   | 0.64 | 32.40  | 112.29  | 322.45  | 1017.91  |
| 0.24 | 49299.13   | 188950.86   | 581217.33   | 2084429.11   | 0.65 | 27.09  | 92.55   | 263.68  | 864.39   |
| 0.25 | 38290.09   | 146769.52   | 455703.83   | 1640302.66   | 0.66 | 22.56  | 77.03   | 216.67  | 701.09   |
| 0.26 | 30592.76   | 118264.04   | 354119.62   | 1290121.34   | 0.67 | 18.87  | 63.89   | 175.29  | 557.72   |
| 0.27 | 25025.55   | 96323.85    | 286669.56   | 1058938.89   | 0.68 | 15.46  | 52.35   | 142.79  | 461.19   |
| 0.28 | 20395.26   | 79199.15    | 242750.00   | 884047.40    | 0.69 | 12.86  | 43.47   | 118.23  | 361.69   |
| 0.29 | 16945.34   | 64495.27    | 194036.21   | 702376.01    | 0.70 | 10.71  | 35.10   | 96.13   | 290.63   |
| 0.30 | 13616.55   | 52598.80    | 159275.66   | 540802.70    | 0.71 | 8.89   | 28.16   | 77.54   | 228.42   |
| 0.31 | 11042.01   | 42200.30    | 128704.90   | 440307.71    | 0.72 | 7.26   | 22.87   | 62.57   | 188.00   |
| 0.32 | 9265.05    | 34570.38    | 106108.62   | 363005.83    | 0.73 | 5.92   | 18.79   | 51.13   | 152.20   |
| 0.33 | 7566.89    | 28621.05    | 89589.27    | 298495.56    | 0.74 | 4.77   | 15.01   | 39.72   | 126.70   |
| 0.34 | 6254.98    | 24334.01    | 75029.49    | 249917.82    | 0.75 | 3.89   | 12.18   | 32.25   | 96.99    |
| 0.35 | 5142.62    | 19780.20    | 59904.10    | 205870.56    | 0.76 | 3.12   | 9.48    | 25.46   | 77.50    |
| 0.36 | 4265.24    | 16435.18    | 50424.37    | 169891.21    | 0.77 | 2.55   | 7.48    | 19.85   | 57.99    |
| 0.37 | 3545.60    | 13783.26    | 40812.36    | 140441.71    | 0.78 | 2.04   | 5.93    | 15.47   | 45.07    |
| 0.38 | 2963.38    | 11298.28    | 33201.66    | 119327.81    | 0.79 | 1.64   | 4.67    | 12.02   | 35.56    |
| 0.39 | 2481.87    | 9281.97     | 28134.40    | 100314.89    | 0.80 | 1.31   | 3.66    | 9.33    | 26.82    |
| 0.40 | 2084.75    | 7805.63     | 24055.64    | 82203.06     | 0.81 | 1.04   | 2.83    | 7.16    | 20.40    |
| 0.41 | 1710.80    | 6495.76     | 19788.43    | 68645.88     | 0.82 | 0.83   | 2.19    | 5.49    | 15.61    |
| 0.42 | 1413.41    | 5318.76     | 16787.91    | 57391.91     | 0.83 | 0.66   | 1.65    | 4.12    | 11.79    |
| 0.43 | 1174.12    | 4478.31     | 13629.29    | 46928.24     | 0.84 | 0.51   | 1.24    | 3.06    | 8.74     |
| 0.44 | 984.50     | 3756.61     | 11220.90    | 38662.54     | 0.85 | 0.40   | 0.94    | 2.33    | 6.30     |
| 0.45 | 831.28     | 3127.11     | 9643.91     | 33066.73     | 0.86 | 0.31   | 0.71    | 1.66    | 4.35     |
| 0.46 | 705.19     | 2657.36     | 8049.80     | 27488.06     | 0.87 | 0.24   | 0.53    | 1.18    | 3.09     |
| 0.47 | 598.83     | 2207.35     | 6657.12     | 22568.05     | 0.88 | 0.18   | 0.39    | 0.83    | 2.18     |
| 0.48 | 513.73     | 1861.40     | 5396.43     | 18780.75     | 0.89 | 0.14   | 0.28    | 0.58    | 1.50     |
| 0.49 | 429.87     | 1581.85     | 4637.44     | 15843.47     | 0.90 | 0.10   | 0.20    | 0.40    | 0.99     |
| 0.50 | 370.42     | 1337.05     | 3947.42     | 13100.71     |      |        |         |         |          |

Table S297: Critical values for detector  $\hat{H}_{mov}^{m,0.2}$  with windows size  $n = 0.2$ , and IM-OLS estimation in a model with intercept. The number of integrated regressors is 4 and the highest power of  $x_{kt}$  is 3.

| m    | 90 %       | 95 %       | 97,5 %      | 99 %        | m    | 90 %   | 95 %   | 97,5 %  | 99 %    |
|------|------------|------------|-------------|-------------|------|--------|--------|---------|---------|
| 0.10 | 1354654.01 | 4889607.80 | 14874312.41 | 48480848.03 | 0.51 | 111.40 | 379.60 | 1068.98 | 3139.99 |
| 0.11 | 879898.06  | 3221918.28 | 9512375.03  | 31128290.48 | 0.52 | 93.64  | 318.40 | 891.00  | 2567.99 |
| 0.12 | 601150.63  | 2175193.35 | 6367758.24  | 21097169.10 | 0.53 | 78.77  | 270.69 | 751.94  | 2274.54 |
| 0.13 | 408898.49  | 1481500.80 | 4368906.13  | 14584564.20 | 0.54 | 66.68  | 225.43 | 629.55  | 1847.13 |
| 0.14 | 286505.23  | 1048271.41 | 3116836.28  | 10359121.64 | 0.55 | 55.12  | 186.61 | 513.23  | 1556.50 |
| 0.15 | 203979.70  | 740683.95  | 2251795.28  | 7430815.41  | 0.56 | 46.51  | 155.47 | 431.68  | 1292.21 |
| 0.16 | 149522.46  | 526788.27  | 1603209.02  | 5342191.27  | 0.57 | 39.19  | 128.71 | 350.88  | 1050.74 |
| 0.17 | 110122.56  | 390080.69  | 1165100.41  | 3849906.56  | 0.58 | 32.43  | 105.97 | 288.45  | 872.75  |
| 0.18 | 80688.41   | 286974.54  | 856404.27   | 2810361.70  | 0.59 | 27.05  | 89.79  | 234.78  | 729.42  |
| 0.19 | 63255.26   | 222073.37  | 649624.78   | 2129760.98  | 0.60 | 22.85  | 73.58  | 193.48  | 615.54  |
| 0.20 | 48532.68   | 173638.48  | 507240.58   | 1653153.29  | 0.61 | 19.38  | 62.19  | 160.88  | 504.27  |
| 0.21 | 37755.98   | 136154.12  | 390185.57   | 1243916.52  | 0.62 | 15.98  | 51.07  | 133.83  | 422.32  |
| 0.22 | 30148.61   | 106702.19  | 310027.23   | 994119.44   | 0.63 | 13.32  | 42.65  | 110.47  | 334.88  |
| 0.23 | 23565.40   | 84962.82   | 246928.63   | 788650.59   | 0.64 | 11.24  | 35.71  | 90.84   | 273.40  |
| 0.24 | 18972.17   | 68402.85   | 194880.56   | 620387.79   | 0.65 | 9.46   | 29.78  | 74.35   | 217.25  |
| 0.25 | 15028.23   | 53589.15   | 155924.51   | 474058.44   | 0.66 | 7.83   | 23.94  | 63.88   | 188.87  |
| 0.26 | 11863.09   | 42868.74   | 120734.04   | 379866.64   | 0.67 | 6.45   | 19.80  | 51.68   | 145.95  |
| 0.27 | 9509.21    | 34820.86   | 99630.64    | 300602.66   | 0.68 | 5.44   | 16.29  | 42.44   | 123.36  |
| 0.28 | 7656.83    | 27327.33   | 80313.36    | 243965.24   | 0.69 | 4.55   | 13.13  | 34.62   | 98.54   |
| 0.29 | 6171.09    | 22457.82   | 64423.15    | 202880.53   | 0.70 | 3.68   | 10.70  | 27.42   | 80.87   |
| 0.30 | 4932.70    | 18217.61   | 51382.43    | 161857.90   | 0.71 | 3.05   | 8.79   | 22.45   | 65.67   |
| 0.31 | 4068.33    | 14960.21   | 42487.13    | 134336.39   | 0.72 | 2.48   | 7.11   | 18.22   | 53.42   |
| 0.32 | 3349.51    | 12250.90   | 34597.08    | 108914.92   | 0.73 | 2.06   | 5.79   | 14.50   | 41.67   |
| 0.33 | 2768.23    | 10136.51   | 28350.51    | 89251.68    | 0.74 | 1.69   | 4.65   | 11.83   | 32.49   |
| 0.34 | 2255.85    | 8088.00    | 23406.86    | 73897.23    | 0.75 | 1.38   | 3.76   | 9.32    | 26.34   |
| 0.35 | 1870.07    | 6745.80    | 19558.22    | 62204.40    | 0.76 | 1.14   | 3.06   | 7.42    | 20.24   |
| 0.36 | 1523.73    | 5553.34    | 16299.94    | 50410.63    | 0.77 | 0.92   | 2.39   | 5.81    | 16.23   |
| 0.37 | 1284.94    | 4546.93    | 13624.19    | 42209.19    | 0.78 | 0.75   | 1.88   | 4.44    | 12.46   |
| 0.38 | 1089.25    | 3786.73    | 11057.39    | 35153.46    | 0.79 | 0.61   | 1.48   | 3.43    | 9.22    |
| 0.39 | 914.16     | 3201.96    | 9125.49     | 28657.23    | 0.80 | 0.49   | 1.17   | 2.67    | 7.33    |
| 0.40 | 743.41     | 2688.74    | 7603.41     | 23658.79    | 0.81 | 0.40   | 0.91   | 2.09    | 5.46    |
| 0.41 | 624.27     | 2243.42    | 6372.92     | 20021.52    | 0.82 | 0.32   | 0.71   | 1.60    | 4.10    |
| 0.42 | 521.62     | 1821.51    | 5252.57     | 16087.47    | 0.83 | 0.25   | 0.54   | 1.20    | 3.13    |
| 0.43 | 431.98     | 1548.39    | 4396.80     | 13809.50    | 0.84 | 0.20   | 0.41   | 0.89    | 2.23    |
| 0.44 | 356.38     | 1279.50    | 3668.01     | 11320.94    | 0.85 | 0.16   | 0.32   | 0.67    | 1.61    |
| 0.45 | 304.76     | 1073.19    | 3088.62     | 9685.65     | 0.86 | 0.13   | 0.24   | 0.48    | 1.15    |
| 0.46 | 259.34     | 906.92     | 2532.38     | 7727.59     | 0.87 | 0.10   | 0.18   | 0.35    | 0.85    |
| 0.47 | 217.81     | 761.96     | 2125.85     | 6717.09     | 0.88 | 0.08   | 0.14   | 0.25    | 0.57    |
| 0.48 | 185.77     | 639.32     | 1795.61     | 5602.02     | 0.89 | 0.07   | 0.10   | 0.18    | 0.39    |
| 0.49 | 157.21     | 536.63     | 1500.27     | 4757.24     | 0.90 | 0.05   | 0.08   | 0.13    | 0.26    |
| 0.50 | 130.38     | 446.41     | 1248.02     | 3836.99     |      |        |        |         |         |

Table S298: Critical values for detector  $\hat{H}_{mov}^{m,0.3}$  with windows size  $n = 0.3$ , and FM-OLS and D-OLS estimation in a model with intercept. The number of integrated regressors is 4 and the highest power of  $x_{kt}$  is 3.

| m    | 90 %       | 95 %        | 97,5 %      | 99 %         | m    | 90 %   | 95 %    | 97,5 %  | 99 %     |
|------|------------|-------------|-------------|--------------|------|--------|---------|---------|----------|
| 0.10 | 4240319.58 | 16582350.06 | 50784929.83 | 185407422.15 | 0.51 | 336.59 | 1223.25 | 3523.21 | 11585.11 |
| 0.11 | 2730382.85 | 10449768.88 | 32309836.93 | 117551544.50 | 0.52 | 286.36 | 1024.70 | 2941.64 | 9753.56  |
| 0.12 | 1851956.56 | 7124219.07  | 21730796.97 | 79839619.58  | 0.53 | 236.52 | 848.38  | 2425.25 | 8157.24  |
| 0.13 | 1248372.81 | 4896996.12  | 15388948.40 | 59967215.04  | 0.54 | 199.76 | 710.56  | 2023.83 | 6811.61  |
| 0.14 | 900955.47  | 3551080.79  | 11109463.68 | 39656502.53  | 0.55 | 170.25 | 589.56  | 1684.42 | 5422.22  |
| 0.15 | 631371.42  | 2492566.50  | 7899168.17  | 27420097.90  | 0.56 | 142.30 | 497.17  | 1424.96 | 4712.27  |
| 0.16 | 465556.85  | 1803577.42  | 5862424.22  | 19712729.53  | 0.57 | 118.44 | 426.97  | 1209.08 | 3890.44  |
| 0.17 | 347179.48  | 1363577.52  | 4392753.59  | 14667058.42  | 0.58 | 97.29  | 353.11  | 1000.05 | 3235.33  |
| 0.18 | 256889.06  | 1026651.53  | 3170564.68  | 10875001.95  | 0.59 | 81.82  | 295.28  | 857.95  | 2717.34  |
| 0.19 | 194180.10  | 746264.22   | 2418541.78  | 8223956.62   | 0.60 | 67.17  | 250.25  | 703.63  | 2324.99  |
| 0.20 | 148960.24  | 583122.00   | 1828106.21  | 6396816.27   | 0.61 | 56.92  | 205.93  | 595.30  | 1870.66  |
| 0.21 | 115471.75  | 443084.38   | 1405393.34  | 5177593.99   | 0.62 | 47.50  | 169.30  | 480.37  | 1511.40  |
| 0.22 | 90665.55   | 342577.12   | 1052955.35  | 3922991.95   | 0.63 | 40.05  | 137.56  | 396.78  | 1269.04  |
| 0.23 | 70687.57   | 269729.26   | 815941.48   | 2959179.26   | 0.64 | 33.51  | 115.09  | 328.74  | 1046.47  |
| 0.24 | 55351.52   | 214408.18   | 647465.49   | 2384850.76   | 0.65 | 27.93  | 94.38   | 269.75  | 873.39   |
| 0.25 | 43247.39   | 165463.39   | 512197.18   | 1856843.60   | 0.66 | 23.29  | 78.41   | 220.34  | 712.00   |
| 0.26 | 34337.43   | 133103.32   | 398184.77   | 1458492.06   | 0.67 | 19.33  | 64.85   | 177.38  | 567.90   |
| 0.27 | 28328.49   | 108174.45   | 320051.31   | 1196604.55   | 0.68 | 15.81  | 53.13   | 144.05  | 466.91   |
| 0.28 | 22977.11   | 89543.49    | 270338.74   | 979813.35    | 0.69 | 13.09  | 43.86   | 119.87  | 363.28   |
| 0.29 | 18971.36   | 72607.21    | 217963.81   | 775537.92    | 0.70 | 10.89  | 35.43   | 96.66   | 292.50   |
| 0.30 | 15299.26   | 59082.29    | 176810.44   | 611143.38    | 0.71 | 8.99   | 28.42   | 78.07   | 229.42   |
| 0.31 | 12296.68   | 47309.26    | 143346.51   | 492518.35    | 0.72 | 7.33   | 22.99   | 62.84   | 188.50   |
| 0.32 | 10351.36   | 38526.99    | 119270.68   | 404145.25    | 0.73 | 5.96   | 18.91   | 51.20   | 152.38   |
| 0.33 | 8516.09    | 31880.18    | 99674.23    | 331785.11    | 0.74 | 4.80   | 15.06   | 39.81   | 126.82   |
| 0.34 | 6988.81    | 26891.28    | 82553.72    | 276421.48    | 0.75 | 3.91   | 12.21   | 32.26   | 97.07    |
| 0.35 | 5723.18    | 21883.20    | 66866.53    | 229228.12    | 0.76 | 3.14   | 9.51    | 25.47   | 77.52    |
| 0.36 | 4744.87    | 18277.96    | 55846.17    | 186215.21    | 0.77 | 2.55   | 7.49    | 19.85   | 58.01    |
| 0.37 | 3949.23    | 15282.15    | 45240.16    | 156466.66    | 0.78 | 2.04   | 5.93    | 15.48   | 45.07    |
| 0.38 | 3275.53    | 12451.84    | 37140.29    | 131305.60    | 0.79 | 1.65   | 4.67    | 12.02   | 35.57    |
| 0.39 | 2737.15    | 10293.28    | 30781.68    | 109654.41    | 0.80 | 1.32   | 3.66    | 9.33    | 26.83    |
| 0.40 | 2296.29    | 8582.73     | 26363.97    | 88108.32     | 0.81 | 1.04   | 2.83    | 7.16    | 20.40    |
| 0.41 | 1876.80    | 7128.41     | 21737.06    | 75080.40     | 0.82 | 0.83   | 2.19    | 5.49    | 15.61    |
| 0.42 | 1536.93    | 5829.05     | 18200.73    | 61782.69     | 0.83 | 0.66   | 1.66    | 4.12    | 11.79    |
| 0.43 | 1279.68    | 4844.30     | 14852.29    | 50771.07     | 0.84 | 0.51   | 1.25    | 3.06    | 8.74     |
| 0.44 | 1077.96    | 4088.49     | 12146.59    | 41970.92     | 0.85 | 0.40   | 0.94    | 2.33    | 6.30     |
| 0.45 | 903.15     | 3404.23     | 10385.35    | 35460.41     | 0.86 | 0.31   | 0.71    | 1.66    | 4.35     |
| 0.46 | 765.09     | 2878.12     | 8681.06     | 29360.91     | 0.87 | 0.24   | 0.53    | 1.18    | 3.09     |
| 0.47 | 648.98     | 2390.46     | 7177.36     | 24043.83     | 0.88 | 0.18   | 0.39    | 0.83    | 2.18     |
| 0.48 | 558.62     | 2003.45     | 5794.71     | 19952.03     | 0.89 | 0.14   | 0.28    | 0.58    | 1.50     |
| 0.49 | 463.88     | 1713.22     | 4887.22     | 16819.58     | 0.90 | 0.10   | 0.20    | 0.40    | 0.99     |
| 0.50 | 398.99     | 1430.04     | 4171.88     | 14136.57     |      |        |         |         |          |

Table S299: Critical values for detector  $\hat{H}_{mov}^{m,0.3}$  with windows size  $n = 0.3$ , and IM-OLS estimation in a model with intercept. The number of integrated regressors is 4 and the highest power of  $x_{kt}$  is 3.

| m    | 90 %       | 95 %       | 97,5 %      | 99 %        | m    | 90 %  | 95 %   | 97,5 % | 99 %    |
|------|------------|------------|-------------|-------------|------|-------|--------|--------|---------|
| 0.10 | 1381451.43 | 4596992.12 | 12520647.68 | 39604824.81 | 0.51 | 89.71 | 294.78 | 818.93 | 2478.60 |
| 0.11 | 893199.48  | 2927576.46 | 8051544.49  | 24330465.94 | 0.52 | 76.27 | 248.49 | 683.98 | 1944.01 |
| 0.12 | 587523.26  | 1908759.36 | 5359918.99  | 16164456.04 | 0.53 | 65.09 | 211.59 | 587.06 | 1734.66 |
| 0.13 | 395582.15  | 1298853.20 | 3565298.19  | 11068767.94 | 0.54 | 54.89 | 178.82 | 492.15 | 1443.57 |
| 0.14 | 269973.87  | 895252.95  | 2509375.37  | 7653300.68  | 0.55 | 45.61 | 148.97 | 404.38 | 1243.07 |
| 0.15 | 187788.13  | 628822.20  | 1753670.34  | 5636595.90  | 0.56 | 38.83 | 125.48 | 341.99 | 993.74  |
| 0.16 | 136253.93  | 452168.54  | 1261589.47  | 4002792.44  | 0.57 | 33.03 | 103.33 | 278.76 | 844.41  |
| 0.17 | 99285.12   | 323955.10  | 907775.15   | 2923996.88  | 0.58 | 27.86 | 86.05  | 232.51 | 701.72  |
| 0.18 | 71620.96   | 240657.50  | 666846.22   | 2020437.73  | 0.59 | 23.66 | 72.70  | 194.78 | 580.62  |
| 0.19 | 55010.28   | 182588.32  | 503457.34   | 1563050.61  | 0.60 | 20.02 | 60.97  | 165.38 | 500.97  |
| 0.20 | 42210.58   | 138202.56  | 380074.76   | 1205549.82  | 0.61 | 16.98 | 52.02  | 133.65 | 412.71  |
| 0.21 | 32450.90   | 108548.59  | 294434.09   | 924965.13   | 0.62 | 14.26 | 42.97  | 112.50 | 349.11  |
| 0.22 | 24953.72   | 82813.32   | 229947.74   | 719950.62   | 0.63 | 12.07 | 36.10  | 93.30  | 283.46  |
| 0.23 | 19467.62   | 65531.96   | 179927.79   | 570372.65   | 0.64 | 10.29 | 30.47  | 77.48  | 232.44  |
| 0.24 | 15809.88   | 52798.35   | 142537.42   | 444699.65   | 0.65 | 8.74  | 25.42  | 63.93  | 191.58  |
| 0.25 | 12459.13   | 41852.75   | 114536.14   | 336119.88   | 0.66 | 7.39  | 21.03  | 55.10  | 163.43  |
| 0.26 | 9836.69    | 32643.72   | 89385.13    | 271432.56   | 0.67 | 6.15  | 17.59  | 45.34  | 130.64  |
| 0.27 | 7747.66    | 26291.28   | 71428.89    | 215849.63   | 0.68 | 5.22  | 14.51  | 37.75  | 108.29  |
| 0.28 | 6177.61    | 21040.65   | 57671.46    | 173997.72   | 0.69 | 4.47  | 11.96  | 30.38  | 88.81   |
| 0.29 | 4984.20    | 17020.53   | 46754.80    | 141338.97   | 0.70 | 3.70  | 9.92   | 24.99  | 74.37   |
| 0.30 | 3995.26    | 13620.78   | 37232.10    | 112335.41   | 0.71 | 3.07  | 8.17   | 20.94  | 61.51   |
| 0.31 | 3235.65    | 11091.17   | 30954.24    | 94268.81    | 0.72 | 2.56  | 6.67   | 17.01  | 49.62   |
| 0.32 | 2638.80    | 9114.60    | 25234.64    | 77190.25    | 0.73 | 2.15  | 5.52   | 13.75  | 39.51   |
| 0.33 | 2191.23    | 7513.02    | 20586.38    | 61294.58    | 0.74 | 1.80  | 4.53   | 11.14  | 30.79   |
| 0.34 | 1797.46    | 6028.65    | 16944.32    | 52172.79    | 0.75 | 1.49  | 3.66   | 8.89   | 24.72   |
| 0.35 | 1486.57    | 5078.52    | 14099.98    | 42296.96    | 0.76 | 1.25  | 2.99   | 7.13   | 19.93   |
| 0.36 | 1218.83    | 4212.00    | 11538.97    | 34811.45    | 0.77 | 1.03  | 2.38   | 5.70   | 15.51   |
| 0.37 | 1025.58    | 3444.57    | 9747.71     | 29493.01    | 0.78 | 0.84  | 1.89   | 4.41   | 12.24   |
| 0.38 | 851.13     | 2870.34    | 8100.80     | 24216.32    | 0.79 | 0.69  | 1.51   | 3.38   | 9.38    |
| 0.39 | 715.08     | 2385.76    | 6652.34     | 20278.05    | 0.80 | 0.56  | 1.21   | 2.67   | 7.44    |
| 0.40 | 585.52     | 2027.11    | 5632.23     | 17060.85    | 0.81 | 0.46  | 0.95   | 2.10   | 5.52    |
| 0.41 | 488.67     | 1682.99    | 4611.72     | 14445.68    | 0.82 | 0.37  | 0.75   | 1.65   | 4.18    |
| 0.42 | 408.65     | 1388.97    | 3869.83     | 11920.56    | 0.83 | 0.30  | 0.59   | 1.25   | 3.20    |
| 0.43 | 339.94     | 1165.52    | 3235.19     | 10130.22    | 0.84 | 0.23  | 0.46   | 0.93   | 2.30    |
| 0.44 | 280.61     | 969.82     | 2704.90     | 8456.76     | 0.85 | 0.18  | 0.35   | 0.70   | 1.66    |
| 0.45 | 242.85     | 810.86     | 2284.00     | 7124.00     | 0.86 | 0.15  | 0.27   | 0.51   | 1.18    |
| 0.46 | 205.10     | 686.03     | 1896.16     | 5780.63     | 0.87 | 0.11  | 0.20   | 0.38   | 0.87    |
| 0.47 | 172.60     | 578.79     | 1626.24     | 5031.71     | 0.88 | 0.08  | 0.14   | 0.26   | 0.60    |
| 0.48 | 147.79     | 489.27     | 1369.37     | 4262.26     | 0.89 | 0.06  | 0.11   | 0.18   | 0.40    |
| 0.49 | 126.67     | 416.46     | 1144.18     | 3576.09     | 0.90 | 0.05  | 0.08   | 0.13   | 0.27    |
| 0.50 | 106.08     | 343.15     | 954.13      | 2875.34     |      |       |        |        |         |

Table S300: Critical values for detector  $\hat{H}_{mov}^{m,0.1}$  with windows size  $n = 0.1$ , and FM-OLS and D-OLS estimation in a model with intercept and linear trend. The number of integrated regressors is 4 and the highest power of  $x_{kt}$  is 3.

| m    | 90 %       | 95 %        | 97,5 %      | 99 %         | m    | 90 %   | 95 %   | 97,5 %  | 99 %    |
|------|------------|-------------|-------------|--------------|------|--------|--------|---------|---------|
| 0.10 | 4104743.11 | 14537504.25 | 41855256.58 | 141359221.70 | 0.51 | 252.65 | 888.24 | 2555.16 | 8407.16 |
| 0.11 | 2574869.66 | 9319967.42  | 27110871.65 | 88185399.88  | 0.52 | 216.34 | 764.92 | 2152.65 | 7182.57 |
| 0.12 | 1720816.92 | 5986504.42  | 17955728.28 | 57186742.93  | 0.53 | 181.72 | 646.41 | 1808.59 | 5901.43 |
| 0.13 | 1157749.29 | 4060892.96  | 12033472.12 | 41800767.83  | 0.54 | 154.45 | 536.35 | 1524.09 | 4859.83 |
| 0.14 | 801403.08  | 2872925.78  | 8710544.18  | 29137238.04  | 0.55 | 131.06 | 445.14 | 1290.59 | 4159.19 |
| 0.15 | 558718.97  | 2015631.58  | 5830509.16  | 19960309.31  | 0.56 | 110.23 | 376.87 | 1099.48 | 3687.12 |
| 0.16 | 396367.69  | 1435266.40  | 4325484.40  | 14186016.43  | 0.57 | 93.12  | 322.02 | 907.59  | 2965.28 |
| 0.17 | 295693.10  | 1052995.82  | 3133083.08  | 10243080.91  | 0.58 | 77.89  | 271.21 | 771.12  | 2490.30 |
| 0.18 | 218720.89  | 788413.84   | 2265788.94  | 7187278.41   | 0.59 | 65.32  | 228.71 | 663.15  | 2093.31 |
| 0.19 | 163785.84  | 589399.91   | 1721960.17  | 5611591.95   | 0.60 | 54.49  | 194.25 | 561.93  | 1785.12 |
| 0.20 | 123413.41  | 435490.32   | 1314584.38  | 4564857.86   | 0.61 | 46.64  | 159.32 | 466.00  | 1480.66 |
| 0.21 | 93421.10   | 336977.12   | 1007111.32  | 3432519.79   | 0.62 | 39.35  | 131.33 | 376.32  | 1200.61 |
| 0.22 | 72251.54   | 257384.95   | 763535.91   | 2610180.66   | 0.63 | 33.07  | 108.99 | 308.82  | 1009.68 |
| 0.23 | 56002.72   | 202365.87   | 583867.50   | 2010001.29   | 0.64 | 28.26  | 90.80  | 262.87  | 811.32  |
| 0.24 | 43425.94   | 157223.35   | 465395.21   | 1609217.27   | 0.65 | 24.02  | 75.98  | 216.09  | 669.90  |
| 0.25 | 33853.18   | 121610.57   | 368266.62   | 1281303.84   | 0.66 | 20.10  | 63.14  | 174.87  | 552.62  |
| 0.26 | 26816.54   | 97420.44    | 278494.77   | 962454.61    | 0.67 | 17.01  | 53.03  | 145.14  | 462.74  |
| 0.27 | 21841.04   | 77645.86    | 225412.98   | 780422.93    | 0.68 | 14.25  | 44.20  | 121.06  | 372.51  |
| 0.28 | 17470.16   | 63082.00    | 183982.35   | 609716.94    | 0.69 | 11.83  | 37.66  | 101.36  | 303.59  |
| 0.29 | 14498.53   | 51524.96    | 150198.65   | 476563.14    | 0.70 | 9.97   | 31.00  | 81.43   | 250.34  |
| 0.30 | 11536.48   | 41684.12    | 120183.85   | 383116.65    | 0.71 | 8.30   | 25.33  | 67.19   | 203.27  |
| 0.31 | 9441.91    | 34424.21    | 96081.35    | 323456.56    | 0.72 | 6.84   | 20.53  | 54.77   | 171.00  |
| 0.32 | 7705.18    | 27872.76    | 81226.41    | 263297.28    | 0.73 | 5.66   | 16.64  | 43.16   | 132.52  |
| 0.33 | 6381.64    | 22654.21    | 66647.37    | 216392.70    | 0.74 | 4.67   | 13.49  | 36.36   | 107.61  |
| 0.34 | 5221.50    | 19439.94    | 55319.06    | 179060.32    | 0.75 | 3.80   | 10.96  | 29.73   | 86.09   |
| 0.35 | 4297.91    | 15992.83    | 46755.23    | 150207.82    | 0.76 | 3.12   | 8.74   | 23.41   | 68.26   |
| 0.36 | 3510.00    | 12953.11    | 38268.64    | 123795.17    | 0.77 | 2.57   | 6.91   | 18.22   | 54.25   |
| 0.37 | 2931.25    | 10762.69    | 31791.09    | 101358.29    | 0.78 | 2.09   | 5.56   | 14.39   | 42.63   |
| 0.38 | 2427.67    | 8736.35     | 25398.14    | 85856.02     | 0.79 | 1.72   | 4.38   | 11.21   | 33.91   |
| 0.39 | 2006.11    | 7150.68     | 20860.68    | 70411.65     | 0.80 | 1.40   | 3.43   | 8.90    | 25.89   |
| 0.40 | 1678.63    | 6050.29     | 17411.06    | 58723.76     | 0.81 | 1.13   | 2.74   | 6.82    | 19.70   |
| 0.41 | 1393.74    | 4988.53     | 14667.14    | 48505.09     | 0.82 | 0.91   | 2.19   | 5.20    | 14.86   |
| 0.42 | 1150.13    | 4116.28     | 12263.18    | 40981.56     | 0.83 | 0.73   | 1.67   | 3.98    | 10.98   |
| 0.43 | 950.74     | 3464.57     | 10157.73    | 33850.32     | 0.84 | 0.57   | 1.29   | 2.98    | 8.20    |
| 0.44 | 795.36     | 2900.00     | 8360.18     | 28133.63     | 0.85 | 0.45   | 0.97   | 2.21    | 5.85    |
| 0.45 | 674.40     | 2432.50     | 7159.63     | 22908.37     | 0.86 | 0.35   | 0.74   | 1.61    | 4.23    |
| 0.46 | 571.95     | 2084.23     | 5981.11     | 19938.90     | 0.87 | 0.27   | 0.54   | 1.16    | 3.08    |
| 0.47 | 487.61     | 1739.48     | 5050.39     | 16719.60     | 0.88 | 0.20   | 0.40   | 0.83    | 2.12    |
| 0.48 | 414.50     | 1485.53     | 4105.74     | 13529.36     | 0.89 | 0.15   | 0.29   | 0.58    | 1.46    |
| 0.49 | 345.79     | 1253.42     | 3542.34     | 11542.23     | 0.90 | 0.11   | 0.21   | 0.40    | 0.97    |
| 0.50 | 298.40     | 1053.65     | 2976.54     | 10092.97     |      |        |        |         |         |

Table S301: Critical values for detector  $\hat{H}_{mov}^{m,0.1}$  with windows size  $n = 0.1$ , and IM-OLS estimation in a model with intercept and linear trend. The number of integrated regressors is 4 and the highest power of  $x_{kt}$  is 3.

| m    | 90 %       | 95 %       | 97,5 %      | 99 %        | m    | 90 %   | 95 %   | 97,5 %  | 99 %    |
|------|------------|------------|-------------|-------------|------|--------|--------|---------|---------|
| 0.10 | 1814926.83 | 6145102.08 | 17037292.42 | 54411435.84 | 0.51 | 118.65 | 383.05 | 1069.19 | 3195.93 |
| 0.11 | 1173134.17 | 3937224.28 | 11065680.28 | 34095859.86 | 0.52 | 100.49 | 326.15 | 893.10  | 2528.30 |
| 0.12 | 777224.62  | 2592192.69 | 7328031.67  | 22510289.36 | 0.53 | 84.89  | 274.89 | 755.97  | 2226.80 |
| 0.13 | 523248.67  | 1760738.22 | 4901944.24  | 15573798.13 | 0.54 | 72.29  | 232.57 | 627.72  | 1835.80 |
| 0.14 | 359234.61  | 1219194.37 | 3465743.90  | 10664937.17 | 0.55 | 59.35  | 191.86 | 518.39  | 1578.69 |
| 0.15 | 250035.73  | 860436.49  | 2411570.99  | 7861848.95  | 0.56 | 50.44  | 161.21 | 439.10  | 1271.48 |
| 0.16 | 183194.25  | 612037.09  | 1745906.73  | 5540703.71  | 0.57 | 42.66  | 132.54 | 352.86  | 1057.05 |
| 0.17 | 133232.49  | 443876.28  | 1256244.34  | 4146742.26  | 0.58 | 35.75  | 109.24 | 296.54  | 869.70  |
| 0.18 | 96160.34   | 329042.47  | 919012.52   | 2817848.41  | 0.59 | 30.40  | 91.85  | 243.91  | 725.70  |
| 0.19 | 74183.40   | 247526.52  | 695686.15   | 2197328.90  | 0.60 | 25.59  | 76.15  | 206.77  | 620.50  |
| 0.20 | 57163.82   | 190292.78  | 520642.56   | 1687932.02  | 0.61 | 21.53  | 64.89  | 167.78  | 507.95  |
| 0.21 | 43576.46   | 148375.42  | 409328.31   | 1264216.76  | 0.62 | 18.11  | 53.50  | 137.64  | 426.52  |
| 0.22 | 33756.11   | 114407.39  | 320385.15   | 1000902.42  | 0.63 | 15.21  | 44.56  | 113.01  | 345.01  |
| 0.23 | 26370.79   | 89801.95   | 252119.78   | 797998.58   | 0.64 | 12.88  | 37.16  | 93.73   | 285.71  |
| 0.24 | 21413.93   | 72256.91   | 199004.16   | 627612.27   | 0.65 | 10.88  | 30.79  | 76.96   | 226.35  |
| 0.25 | 16866.63   | 57370.97   | 156857.76   | 473715.69   | 0.66 | 9.17   | 25.38  | 65.83   | 191.54  |
| 0.26 | 13306.39   | 44955.76   | 123039.06   | 374732.78   | 0.67 | 7.58   | 21.09  | 53.67   | 153.61  |
| 0.27 | 10534.58   | 36192.92   | 98130.13    | 301982.44   | 0.68 | 6.40   | 17.32  | 44.23   | 127.13  |
| 0.28 | 8412.29    | 28831.93   | 79565.87    | 242369.97   | 0.69 | 5.40   | 14.12  | 35.30   | 102.85  |
| 0.29 | 6698.91    | 23139.14   | 64962.88    | 198740.31   | 0.70 | 4.45   | 11.69  | 28.62   | 84.60   |
| 0.30 | 5403.78    | 18594.04   | 51304.13    | 155972.25   | 0.71 | 3.69   | 9.46   | 23.81   | 70.30   |
| 0.31 | 4395.33    | 15274.30   | 43014.84    | 129937.48   | 0.72 | 3.04   | 7.72   | 19.24   | 55.05   |
| 0.32 | 3579.18    | 12439.99   | 35012.33    | 106204.34   | 0.73 | 2.53   | 6.34   | 15.54   | 43.68   |
| 0.33 | 2947.07    | 10248.09   | 28734.00    | 85910.67    | 0.74 | 2.09   | 5.18   | 12.53   | 33.65   |
| 0.34 | 2424.69    | 8302.46    | 23356.51    | 71192.16    | 0.75 | 1.73   | 4.10   | 9.85    | 26.75   |
| 0.35 | 2005.20    | 6936.97    | 19353.81    | 58321.58    | 0.76 | 1.42   | 3.33   | 7.87    | 21.23   |
| 0.36 | 1638.64    | 5742.22    | 15754.67    | 48205.74    | 0.77 | 1.16   | 2.63   | 6.19    | 16.85   |
| 0.37 | 1372.10    | 4702.39    | 13325.83    | 40870.13    | 0.78 | 0.94   | 2.06   | 4.74    | 13.04   |
| 0.38 | 1148.13    | 3880.90    | 11047.86    | 33501.19    | 0.79 | 0.76   | 1.64   | 3.60    | 9.81    |
| 0.39 | 954.22     | 3242.99    | 9046.79     | 27683.60    | 0.80 | 0.61   | 1.30   | 2.83    | 7.82    |
| 0.40 | 784.14     | 2728.43    | 7591.46     | 23062.56    | 0.81 | 0.49   | 1.01   | 2.20    | 5.72    |
| 0.41 | 660.67     | 2279.68    | 6241.19     | 19496.86    | 0.82 | 0.40   | 0.79   | 1.71    | 4.30    |
| 0.42 | 546.34     | 1871.29    | 5213.22     | 15764.26    | 0.83 | 0.31   | 0.61   | 1.29    | 3.27    |
| 0.43 | 456.75     | 1566.04    | 4334.52     | 13461.19    | 0.84 | 0.24   | 0.47   | 0.95    | 2.33    |
| 0.44 | 375.60     | 1289.45    | 3628.63     | 11197.07    | 0.85 | 0.19   | 0.36   | 0.71    | 1.68    |
| 0.45 | 322.39     | 1081.66    | 3039.12     | 9445.30     | 0.86 | 0.15   | 0.27   | 0.51    | 1.19    |
| 0.46 | 271.47     | 916.05     | 2524.10     | 7717.18     | 0.87 | 0.11   | 0.20   | 0.38    | 0.88    |
| 0.47 | 229.89     | 764.56     | 2131.50     | 6639.09     | 0.88 | 0.09   | 0.15   | 0.26    | 0.61    |
| 0.48 | 194.68     | 652.38     | 1815.83     | 5509.25     | 0.89 | 0.06   | 0.11   | 0.19    | 0.40    |
| 0.49 | 166.81     | 547.98     | 1501.67     | 4666.97     | 0.90 | 0.05   | 0.08   | 0.13    | 0.27    |
| 0.50 | 139.81     | 455.16     | 1247.89     | 3754.11     |      |        |        |         |         |

Table S302: Critical values for detector  $\hat{H}_{mov}^{m,0.2}$  with windows size  $n = 0.2$ , and FM-OLS and D-OLS estimation in a model with intercept and linear trend. The number of integrated regressors is 4 and the highest power of  $x_{kt}$  is 3.

| m    | 90 %       | 95 %        | 97,5 %      | 99 %         | m    | 90 %   | 95 %    | 97,5 %  | 99 %     |
|------|------------|-------------|-------------|--------------|------|--------|---------|---------|----------|
| 0.10 | 5361818.78 | 19466355.85 | 57161676.90 | 193804322.78 | 0.51 | 329.84 | 1154.91 | 3314.12 | 10946.44 |
| 0.11 | 3392543.73 | 12576088.91 | 36895233.91 | 119413253.99 | 0.52 | 283.56 | 985.27  | 2761.62 | 9287.91  |
| 0.12 | 2275666.36 | 8063622.52  | 24512225.23 | 79131570.36  | 0.53 | 238.07 | 826.68  | 2341.52 | 7462.29  |
| 0.13 | 1523283.79 | 5507044.31  | 16630563.07 | 58315051.41  | 0.54 | 200.31 | 691.55  | 1970.19 | 6184.34  |
| 0.14 | 1059968.23 | 3878451.56  | 11745812.56 | 40624873.60  | 0.55 | 169.35 | 577.79  | 1646.81 | 5176.21  |
| 0.15 | 742496.83  | 2736536.42  | 8036998.09  | 28044559.85  | 0.56 | 142.01 | 480.71  | 1399.74 | 4602.04  |
| 0.16 | 531183.07  | 1930340.31  | 6004993.41  | 19627462.33  | 0.57 | 119.95 | 412.99  | 1162.21 | 3736.28  |
| 0.17 | 397349.48  | 1444898.38  | 4305951.34  | 14155126.92  | 0.58 | 99.79  | 345.17  | 977.19  | 3137.20  |
| 0.18 | 293655.18  | 1072376.80  | 3143911.87  | 10120986.59  | 0.59 | 83.28  | 289.38  | 839.09  | 2548.85  |
| 0.19 | 220096.39  | 803955.26   | 2362820.35  | 7697789.28   | 0.60 | 69.61  | 241.31  | 691.88  | 2176.62  |
| 0.20 | 165514.83  | 594910.71   | 1824108.98  | 6407387.34   | 0.61 | 58.79  | 197.51  | 575.99  | 1805.66  |
| 0.21 | 126099.45  | 461499.29   | 1401000.46  | 4837974.07   | 0.62 | 49.20  | 163.26  | 462.44  | 1479.74  |
| 0.22 | 97061.10   | 350793.74   | 1043227.46  | 3646939.12   | 0.63 | 41.44  | 135.08  | 375.43  | 1241.79  |
| 0.23 | 75766.22   | 276854.28   | 809859.51   | 2801641.69   | 0.64 | 35.37  | 111.34  | 318.60  | 1003.87  |
| 0.24 | 58708.68   | 214551.92   | 641379.61   | 2253258.79   | 0.65 | 29.72  | 92.20   | 256.07  | 802.57   |
| 0.25 | 45568.01   | 166917.37   | 511876.40   | 1766050.94   | 0.66 | 24.70  | 76.10   | 208.67  | 664.35   |
| 0.26 | 36208.83   | 133624.91   | 384638.31   | 1332153.28   | 0.67 | 20.80  | 63.35   | 172.87  | 540.96   |
| 0.27 | 29557.29   | 106160.39   | 309392.99   | 1071797.14   | 0.68 | 17.35  | 52.71   | 141.21  | 431.54   |
| 0.28 | 23696.61   | 85501.45    | 254166.13   | 844663.33    | 0.69 | 14.34  | 44.47   | 118.03  | 350.17   |
| 0.29 | 19513.96   | 69878.47    | 206289.78   | 665421.36    | 0.70 | 11.99  | 36.58   | 94.78   | 283.02   |
| 0.30 | 15629.20   | 56928.76    | 164706.66   | 536037.30    | 0.71 | 9.87   | 29.46   | 76.52   | 231.57   |
| 0.31 | 12802.99   | 47076.57    | 131358.44   | 445759.97    | 0.72 | 8.05   | 23.87   | 62.63   | 188.85   |
| 0.32 | 10428.88   | 38298.77    | 110447.13   | 365691.65    | 0.73 | 6.64   | 19.20   | 49.42   | 149.44   |
| 0.33 | 8598.10    | 30884.39    | 91248.27    | 299753.80    | 0.74 | 5.42   | 15.38   | 40.49   | 118.08   |
| 0.34 | 7128.97    | 26495.48    | 76757.48    | 246828.11    | 0.75 | 4.40   | 12.41   | 32.70   | 95.11    |
| 0.35 | 5776.16    | 21741.13    | 63956.70    | 205375.39    | 0.76 | 3.57   | 9.71    | 25.85   | 74.20    |
| 0.36 | 4701.23    | 17529.84    | 52478.33    | 167981.82    | 0.77 | 2.91   | 7.67    | 20.12   | 58.62    |
| 0.37 | 3957.34    | 14633.42    | 43581.31    | 140481.04    | 0.78 | 2.33   | 6.06    | 15.32   | 45.36    |
| 0.38 | 3252.71    | 11697.97    | 34953.60    | 117109.02    | 0.79 | 1.91   | 4.75    | 11.98   | 35.89    |
| 0.39 | 2689.91    | 9676.46     | 28357.83    | 95428.19     | 0.80 | 1.52   | 3.71    | 9.46    | 27.09    |
| 0.40 | 2250.33    | 8135.87     | 23185.32    | 79285.01     | 0.81 | 1.22   | 2.92    | 7.20    | 20.46    |
| 0.41 | 1855.38    | 6738.70     | 19657.83    | 64366.86     | 0.82 | 0.97   | 2.30    | 5.46    | 15.30    |
| 0.42 | 1537.12    | 5509.56     | 16414.51    | 54423.29     | 0.83 | 0.77   | 1.74    | 4.12    | 11.31    |
| 0.43 | 1270.33    | 4623.84     | 13605.57    | 45194.61     | 0.84 | 0.60   | 1.33    | 3.04    | 8.30     |
| 0.44 | 1072.56    | 3885.05     | 11224.45    | 36657.93     | 0.85 | 0.46   | 1.00    | 2.25    | 5.90     |
| 0.45 | 888.60     | 3225.15     | 9572.80     | 30833.04     | 0.86 | 0.36   | 0.76    | 1.63    | 4.27     |
| 0.46 | 757.45     | 2730.75     | 7974.23     | 26359.35     | 0.87 | 0.27   | 0.55    | 1.17    | 3.10     |
| 0.47 | 646.18     | 2317.17     | 6629.04     | 22305.11     | 0.88 | 0.21   | 0.41    | 0.84    | 2.13     |
| 0.48 | 545.17     | 1948.07     | 5446.88     | 17862.76     | 0.89 | 0.15   | 0.29    | 0.58    | 1.46     |
| 0.49 | 456.74     | 1653.34     | 4643.91     | 15112.99     | 0.90 | 0.11   | 0.21    | 0.40    | 0.97     |
| 0.50 | 388.44     | 1379.19     | 3933.67     | 13071.23     |      |        |         |         |          |

Table S303: Critical values for detector  $\hat{H}_{mov}^{m,0.2}$  with windows size  $n = 0.2$ , and IM-OLS estimation in a model with intercept and linear trend. The number of integrated regressors is 4 and the highest power of  $x_{kt}$  is 3.



| m    | 90 %       | 95 %       | 97,5 %      | 99 %        | m    | 90 %   | 95 %   | 97,5 %  | 99 %    |
|------|------------|------------|-------------|-------------|------|--------|--------|---------|---------|
| 0.10 | 1946016.40 | 6660759.05 | 18704940.36 | 59651442.86 | 0.51 | 126.25 | 407.11 | 1125.78 | 3346.58 |
| 0.11 | 1266117.37 | 4287621.90 | 12124970.16 | 37696291.53 | 0.52 | 107.17 | 344.12 | 939.25  | 2645.74 |
| 0.12 | 835042.24  | 2814653.86 | 8012026.45  | 25071680.33 | 0.53 | 89.73  | 287.65 | 789.63  | 2300.93 |
| 0.13 | 567093.36  | 1915604.71 | 5343853.24  | 17178397.87 | 0.54 | 76.80  | 244.05 | 655.88  | 1902.31 |
| 0.14 | 387235.28  | 1327874.98 | 3769526.55  | 11690220.73 | 0.55 | 62.65  | 200.59 | 536.15  | 1638.28 |
| 0.15 | 271316.55  | 934084.56  | 2661102.57  | 8708103.51  | 0.56 | 53.16  | 168.01 | 455.10  | 1331.32 |
| 0.16 | 198013.56  | 667966.93  | 1916564.55  | 6056699.98  | 0.57 | 44.83  | 137.93 | 369.68  | 1092.40 |
| 0.17 | 144061.47  | 483690.19  | 1372683.61  | 4547973.78  | 0.58 | 37.36  | 113.58 | 306.37  | 888.66  |
| 0.18 | 103914.34  | 358193.91  | 1004205.59  | 3098766.17  | 0.59 | 31.81  | 94.94  | 251.20  | 750.56  |
| 0.19 | 80156.76   | 269978.93  | 766208.94   | 2438278.72  | 0.60 | 26.61  | 78.73  | 212.72  | 630.52  |
| 0.20 | 61987.45   | 206760.47  | 568765.96   | 1843347.80  | 0.61 | 22.39  | 67.01  | 171.72  | 517.77  |
| 0.21 | 47245.95   | 161603.93  | 448995.65   | 1400972.32  | 0.62 | 18.75  | 54.94  | 140.79  | 437.25  |
| 0.22 | 36776.38   | 124899.77  | 352455.29   | 1104274.96  | 0.63 | 15.76  | 45.92  | 115.65  | 351.76  |
| 0.23 | 28649.48   | 97390.19   | 276958.54   | 875343.41   | 0.64 | 13.28  | 37.96  | 95.80   | 289.80  |
| 0.24 | 23069.93   | 78724.64   | 218446.27   | 681352.27   | 0.65 | 11.16  | 31.44  | 78.39   | 228.96  |
| 0.25 | 18250.86   | 62274.64   | 173203.41   | 515888.92   | 0.66 | 9.40   | 25.78  | 66.75   | 193.90  |
| 0.26 | 14426.40   | 48876.48   | 133912.99   | 409635.76   | 0.67 | 7.74   | 21.36  | 54.47   | 155.14  |
| 0.27 | 11382.28   | 39158.40   | 107179.59   | 328364.82   | 0.68 | 6.53   | 17.58  | 44.77   | 127.87  |
| 0.28 | 9058.97    | 31421.68   | 86790.28    | 266015.02   | 0.69 | 5.48   | 14.32  | 35.53   | 103.25  |
| 0.29 | 7276.76    | 25248.30   | 70561.42    | 217605.46   | 0.70 | 4.52   | 11.80  | 28.90   | 85.01   |
| 0.30 | 5831.77    | 20141.03   | 56021.89    | 171594.97   | 0.71 | 3.74   | 9.51   | 23.87   | 70.42   |
| 0.31 | 4770.77    | 16606.32   | 46769.79    | 141485.95   | 0.72 | 3.07   | 7.78   | 19.35   | 55.11   |
| 0.32 | 3877.46    | 13485.48   | 38070.31    | 114998.21   | 0.73 | 2.55   | 6.37   | 15.58   | 43.84   |
| 0.33 | 3176.16    | 11108.56   | 30830.62    | 93408.21    | 0.74 | 2.10   | 5.20   | 12.57   | 33.70   |
| 0.34 | 2611.64    | 8976.11    | 25367.00    | 77472.96    | 0.75 | 1.73   | 4.11   | 9.86    | 26.80   |
| 0.35 | 2167.49    | 7504.12    | 20855.67    | 63365.77    | 0.76 | 1.43   | 3.34   | 7.88    | 21.24   |
| 0.36 | 1769.94    | 6204.82    | 17148.06    | 52533.43    | 0.77 | 1.16   | 2.63   | 6.19    | 16.86   |
| 0.37 | 1471.60    | 5044.71    | 14398.99    | 44537.35    | 0.78 | 0.94   | 2.06   | 4.74    | 13.04   |
| 0.38 | 1235.86    | 4167.98    | 11920.07    | 35994.49    | 0.79 | 0.76   | 1.64   | 3.60    | 9.81    |
| 0.39 | 1028.16    | 3475.53    | 9786.48     | 29852.31    | 0.80 | 0.61   | 1.30   | 2.83    | 7.83    |
| 0.40 | 844.48     | 2915.70    | 8198.69     | 24840.48    | 0.81 | 0.49   | 1.01   | 2.20    | 5.72    |
| 0.41 | 712.80     | 2443.96    | 6741.18     | 20879.27    | 0.82 | 0.40   | 0.79   | 1.71    | 4.30    |
| 0.42 | 586.87     | 2013.47    | 5561.37     | 16815.56    | 0.83 | 0.31   | 0.62   | 1.29    | 3.27    |
| 0.43 | 489.46     | 1669.30    | 4635.40     | 14345.05    | 0.84 | 0.25   | 0.47   | 0.95    | 2.33    |
| 0.44 | 403.50     | 1378.70    | 3884.33     | 11944.68    | 0.85 | 0.19   | 0.36   | 0.71    | 1.68    |
| 0.45 | 345.02     | 1155.07    | 3252.19     | 10080.41    | 0.86 | 0.15   | 0.27   | 0.52    | 1.19    |
| 0.46 | 290.54     | 979.67     | 2680.42     | 8244.19     | 0.87 | 0.12   | 0.20   | 0.38    | 0.88    |
| 0.47 | 244.83     | 813.23     | 2281.55     | 7010.45     | 0.88 | 0.09   | 0.15   | 0.26    | 0.61    |
| 0.48 | 207.51     | 691.55     | 1922.99     | 5809.79     | 0.89 | 0.07   | 0.11   | 0.19    | 0.40    |
| 0.49 | 177.95     | 580.26     | 1597.43     | 4983.19     | 0.90 | 0.05   | 0.08   | 0.13    | 0.27    |
| 0.50 | 148.64     | 481.45     | 1312.14     | 3956.63     |      |        |        |         |         |

Table S304: Critical values for detector  $\hat{H}_{mov}^{m,0.3}$  with windows size  $n = 0.3$ , and FM-OLS and D-OLS estimation in a model with intercept and linear trend. The number of integrated regressors is 4 and the highest power of  $x_{kt}$  is 3.

| m    | 90 %       | 95 %        | 97,5 %      | 99 %         | m    | 90 %   | 95 %    | 97,5 %  | 99 %     |
|------|------------|-------------|-------------|--------------|------|--------|---------|---------|----------|
| 0.10 | 5778774.92 | 21075751.88 | 62479991.98 | 213790019.31 | 0.51 | 350.39 | 1221.45 | 3484.20 | 11515.55 |
| 0.11 | 3639752.43 | 13636098.13 | 40569898.97 | 130109047.05 | 0.52 | 298.91 | 1032.69 | 2903.17 | 9674.83  |
| 0.12 | 2457726.55 | 8736627.56  | 26525863.22 | 87988187.99  | 0.53 | 251.65 | 865.33  | 2446.95 | 7712.05  |
| 0.13 | 1643726.51 | 5964794.34  | 18087813.30 | 63127280.70  | 0.54 | 211.49 | 724.61  | 2056.05 | 6435.35  |
| 0.14 | 1144088.95 | 4192942.09  | 12852805.10 | 44663546.88  | 0.55 | 177.91 | 603.84  | 1712.83 | 5427.80  |
| 0.15 | 801234.14  | 2961538.28  | 8775838.68  | 30992817.48  | 0.56 | 149.27 | 503.44  | 1451.89 | 4738.89  |
| 0.16 | 571779.51  | 2079108.31  | 6573355.34  | 21491939.23  | 0.57 | 125.56 | 432.44  | 1199.72 | 3832.00  |
| 0.17 | 428487.65  | 1563796.57  | 4704285.61  | 15592812.40  | 0.58 | 104.13 | 358.13  | 1005.79 | 3221.66  |
| 0.18 | 318024.28  | 1172148.15  | 3432749.92  | 11168741.01  | 0.59 | 87.04  | 299.95  | 866.94  | 2621.24  |
| 0.19 | 237742.71  | 875221.21   | 2578450.81  | 8550529.35   | 0.60 | 72.51  | 249.52  | 707.33  | 2238.12  |
| 0.20 | 178972.90  | 651610.75   | 1994031.00  | 7076513.66   | 0.61 | 60.93  | 204.34  | 591.72  | 1842.76  |
| 0.21 | 136038.59  | 501855.23   | 1535834.47  | 5351570.83   | 0.62 | 51.03  | 169.23  | 473.83  | 1498.53  |
| 0.22 | 104807.26  | 383263.59   | 1130461.51  | 3990268.68   | 0.63 | 42.83  | 138.05  | 383.98  | 1272.03  |
| 0.23 | 81478.67   | 303563.27   | 881244.93   | 3102213.26   | 0.64 | 36.26  | 113.78  | 323.96  | 1017.36  |
| 0.24 | 63496.83   | 234164.05   | 702746.44   | 2488558.72   | 0.65 | 30.57  | 93.70   | 261.79  | 812.48   |
| 0.25 | 49148.40   | 181461.32   | 554068.90   | 1956104.98   | 0.66 | 25.35  | 77.44   | 211.76  | 669.64   |
| 0.26 | 39054.64   | 145248.20   | 421744.56   | 1469801.29   | 0.67 | 21.26  | 64.29   | 174.78  | 544.35   |
| 0.27 | 31992.47   | 115029.40   | 336547.00   | 1177838.56   | 0.68 | 17.71  | 53.60   | 142.68  | 436.16   |
| 0.28 | 25644.71   | 92511.02    | 276774.24   | 922530.84    | 0.69 | 14.57  | 44.90   | 119.21  | 351.53   |
| 0.29 | 21073.32   | 75743.98    | 223400.67   | 736780.27    | 0.70 | 12.15  | 37.00   | 95.22   | 285.28   |
| 0.30 | 16926.79   | 61724.34    | 178794.68   | 586329.44    | 0.71 | 9.97   | 29.72   | 77.00   | 232.47   |
| 0.31 | 13801.41   | 50994.37    | 142501.19   | 486786.81    | 0.72 | 8.13   | 24.00   | 62.91   | 189.60   |
| 0.32 | 11293.44   | 41169.24    | 119846.42   | 394968.63    | 0.73 | 6.69   | 19.31   | 49.52   | 149.61   |
| 0.33 | 9308.87    | 33583.03    | 98597.01    | 326569.44    | 0.74 | 5.45   | 15.41   | 40.60   | 118.09   |
| 0.34 | 7659.33    | 28581.10    | 83465.99    | 265671.72    | 0.75 | 4.42   | 12.43   | 32.76   | 95.17    |
| 0.35 | 6204.20    | 23190.17    | 69095.60    | 219478.50    | 0.76 | 3.57   | 9.73    | 25.86   | 74.22    |
| 0.36 | 5067.06    | 18837.76    | 56679.84    | 181716.82    | 0.77 | 2.91   | 7.67    | 20.12   | 58.63    |
| 0.37 | 4257.09    | 15747.75    | 47017.90    | 152118.48    | 0.78 | 2.33   | 6.06    | 15.33   | 45.36    |
| 0.38 | 3504.24    | 12650.66    | 37656.54    | 126923.54    | 0.79 | 1.91   | 4.75    | 11.98   | 35.89    |
| 0.39 | 2873.39    | 10435.46    | 30411.82    | 102700.61    | 0.80 | 1.52   | 3.71    | 9.46    | 27.09    |
| 0.40 | 2413.41    | 8706.60     | 24986.13    | 84911.52     | 0.81 | 1.22   | 2.92    | 7.20    | 20.46    |
| 0.41 | 1991.77    | 7246.28     | 21200.29    | 69019.93     | 0.82 | 0.98   | 2.30    | 5.46    | 15.30    |
| 0.42 | 1647.32    | 5921.88     | 17500.23    | 58043.04     | 0.83 | 0.77   | 1.74    | 4.12    | 11.31    |
| 0.43 | 1356.46    | 4957.65     | 14503.27    | 48386.79     | 0.84 | 0.60   | 1.33    | 3.04    | 8.30     |
| 0.44 | 1146.09    | 4144.04     | 11984.70    | 39076.49     | 0.85 | 0.46   | 1.00    | 2.25    | 5.90     |
| 0.45 | 945.46     | 3428.36     | 10183.50    | 32667.60     | 0.86 | 0.36   | 0.76    | 1.63    | 4.27     |
| 0.46 | 807.22     | 2909.42     | 8477.94     | 27957.77     | 0.87 | 0.27   | 0.55    | 1.17    | 3.10     |
| 0.47 | 689.19     | 2461.52     | 7016.98     | 23482.08     | 0.88 | 0.21   | 0.41    | 0.84    | 2.13     |
| 0.48 | 581.14     | 2076.26     | 5777.37     | 18792.26     | 0.89 | 0.15   | 0.29    | 0.58    | 1.47     |
| 0.49 | 482.66     | 1736.99     | 4888.87     | 15988.58     | 0.90 | 0.11   | 0.21    | 0.40    | 0.98     |
| 0.50 | 412.26     | 1451.99     | 4150.59     | 13712.71     |      |        |         |         |          |

Table S305: Critical values for detector  $\hat{H}_{mov}^{m,0.3}$  with windows size  $n = 0.3$ , and IM-OLS estimation in a model with intercept and linear trend. The number of integrated regressors is 4 and the highest power of  $x_{kt}$  is 3.

## 5 Detector: $\hat{H}_{mov,sn}^{m,n}$

### 5.1 Number of I(1) regressors: 1

| m    | 90 %     | 95 %      | 97,5 %    | 99 %      | m    | 90 %  | 95 %  | 97,5 % | 99 %   |
|------|----------|-----------|-----------|-----------|------|-------|-------|--------|--------|
| 0.10 | 88735.94 | 171474.10 | 297020.42 | 553906.73 | 0.51 | 38.50 | 65.18 | 103.21 | 176.45 |
| 0.11 | 58376.70 | 111877.25 | 193184.69 | 352432.47 | 0.52 | 34.51 | 57.96 | 91.80  | 155.49 |
| 0.12 | 40051.01 | 77217.99  | 132813.02 | 249045.52 | 0.53 | 31.06 | 51.17 | 81.00  | 136.57 |
| 0.13 | 28348.75 | 54524.82  | 93857.42  | 171183.07 | 0.54 | 27.85 | 46.21 | 72.41  | 125.61 |
| 0.14 | 20405.77 | 39016.94  | 67364.79  | 125266.26 | 0.55 | 24.90 | 41.66 | 65.13  | 108.55 |
| 0.15 | 14883.90 | 28141.97  | 48128.73  | 87999.21  | 0.56 | 22.20 | 37.35 | 58.34  | 98.45  |
| 0.16 | 11249.38 | 21382.64  | 36020.67  | 66416.75  | 0.57 | 20.00 | 33.45 | 52.44  | 86.51  |
| 0.17 | 8529.09  | 16181.46  | 27747.22  | 50031.59  | 0.58 | 17.96 | 30.09 | 46.97  | 76.59  |
| 0.18 | 6589.94  | 12700.14  | 21635.26  | 38914.49  | 0.59 | 16.31 | 27.17 | 42.38  | 69.70  |
| 0.19 | 5139.59  | 9742.56   | 16898.94  | 30577.06  | 0.60 | 14.76 | 24.51 | 37.41  | 63.37  |
| 0.20 | 4069.58  | 7681.84   | 13072.91  | 24143.22  | 0.61 | 13.18 | 22.00 | 33.65  | 55.51  |
| 0.21 | 3293.01  | 6192.77   | 10623.78  | 19752.41  | 0.62 | 11.91 | 19.64 | 29.97  | 49.39  |
| 0.22 | 2631.80  | 4966.30   | 8440.87   | 15516.24  | 0.63 | 10.66 | 17.52 | 26.62  | 43.62  |
| 0.23 | 2159.40  | 4022.38   | 6807.23   | 12518.76  | 0.64 | 9.55  | 15.55 | 23.53  | 38.57  |
| 0.24 | 1756.34  | 3246.04   | 5590.62   | 10254.53  | 0.65 | 8.58  | 14.00 | 21.46  | 34.43  |
| 0.25 | 1440.48  | 2715.57   | 4620.64   | 8394.92   | 0.66 | 7.72  | 12.62 | 19.17  | 31.08  |
| 0.26 | 1213.02  | 2251.45   | 3769.63   | 6682.18   | 0.67 | 6.91  | 11.24 | 17.00  | 26.99  |
| 0.27 | 1011.81  | 1858.80   | 3137.16   | 5558.61   | 0.68 | 6.25  | 10.11 | 15.14  | 24.34  |
| 0.28 | 850.29   | 1558.92   | 2610.01   | 4569.95   | 0.69 | 5.59  | 9.00  | 13.50  | 21.13  |
| 0.29 | 715.44   | 1325.09   | 2204.69   | 3841.66   | 0.70 | 5.00  | 7.98  | 11.94  | 18.77  |
| 0.30 | 601.71   | 1112.21   | 1831.04   | 3243.49   | 0.71 | 4.50  | 7.14  | 10.55  | 16.58  |
| 0.31 | 514.82   | 948.61    | 1550.30   | 2741.76   | 0.72 | 4.05  | 6.40  | 9.44   | 14.87  |
| 0.32 | 447.68   | 810.21    | 1334.94   | 2423.81   | 0.73 | 3.61  | 5.74  | 8.47   | 13.16  |
| 0.33 | 382.61   | 689.04    | 1167.98   | 2037.44   | 0.74 | 3.21  | 5.13  | 7.47   | 11.65  |
| 0.34 | 332.92   | 589.49    | 996.14    | 1746.81   | 0.75 | 2.86  | 4.55  | 6.61   | 10.15  |
| 0.35 | 285.08   | 508.26    | 849.91    | 1516.26   | 0.76 | 2.53  | 4.02  | 5.81   | 8.89   |
| 0.36 | 246.42   | 443.30    | 729.24    | 1298.92   | 0.77 | 2.26  | 3.58  | 5.14   | 7.77   |
| 0.37 | 215.76   | 382.48    | 633.54    | 1116.53   | 0.78 | 1.99  | 3.13  | 4.53   | 6.84   |
| 0.38 | 186.92   | 332.35    | 538.12    | 966.42    | 0.79 | 1.74  | 2.73  | 3.98   | 6.05   |
| 0.39 | 164.18   | 290.04    | 469.49    | 822.31    | 0.80 | 1.54  | 2.40  | 3.47   | 5.25   |
| 0.40 | 143.90   | 253.01    | 407.53    | 716.60    | 0.81 | 1.34  | 2.10  | 3.05   | 4.62   |
| 0.41 | 126.33   | 220.83    | 357.29    | 625.13    | 0.82 | 1.17  | 1.83  | 2.63   | 4.03   |
| 0.42 | 111.21   | 194.54    | 312.83    | 534.40    | 0.83 | 1.01  | 1.57  | 2.27   | 3.39   |
| 0.43 | 97.99    | 169.80    | 275.33    | 468.97    | 0.84 | 0.87  | 1.35  | 1.94   | 2.92   |
| 0.44 | 86.34    | 150.82    | 241.75    | 418.24    | 0.85 | 0.74  | 1.13  | 1.62   | 2.41   |
| 0.45 | 76.48    | 133.42    | 214.78    | 363.53    | 0.86 | 0.63  | 0.96  | 1.38   | 2.04   |
| 0.46 | 68.13    | 117.63    | 187.82    | 323.19    | 0.87 | 0.53  | 0.81  | 1.15   | 1.70   |
| 0.47 | 60.98    | 103.76    | 166.72    | 285.90    | 0.88 | 0.45  | 0.66  | 0.94   | 1.40   |
| 0.48 | 53.79    | 91.31     | 146.85    | 261.03    | 0.89 | 0.38  | 0.54  | 0.76   | 1.10   |
| 0.49 | 48.15    | 82.55     | 131.73    | 221.90    | 0.90 | 0.32  | 0.45  | 0.60   | 0.88   |
| 0.50 | 43.14    | 73.71     | 116.78    | 198.76    |      |       |       |        |        |

Table S306: Critical values for detector  $\hat{H}_{mov,sn}^{m,0.1}$  with windows size  $n = 0.1$ , and FM-OLS and D-OLS estimation in a model with intercept. The number of integrated regressors is 1 and the highest power of  $x_{kt}$  is 1.

| m    | 90 %      | 95 %      | 97,5 %     | 99 %       | m    | 90 %   | 95 %   | 97,5 % | 99 %   |
|------|-----------|-----------|------------|------------|------|--------|--------|--------|--------|
| 0.10 | 311650.16 | 611269.68 | 1040415.25 | 1903160.78 | 0.51 | 123.30 | 213.83 | 341.47 | 591.50 |
| 0.11 | 205504.44 | 401216.43 | 689042.87  | 1260825.59 | 0.52 | 110.02 | 189.93 | 301.75 | 517.68 |
| 0.12 | 140489.83 | 273287.71 | 473183.89  | 880404.81  | 0.53 | 97.57  | 169.76 | 268.80 | 453.99 |
| 0.13 | 99284.68  | 190335.49 | 329662.08  | 605777.10  | 0.54 | 87.14  | 151.30 | 238.06 | 403.57 |
| 0.14 | 70769.85  | 136843.41 | 237514.99  | 442638.29  | 0.55 | 78.28  | 134.49 | 212.09 | 361.28 |
| 0.15 | 51921.44  | 100187.91 | 173630.51  | 320535.15  | 0.56 | 70.22  | 119.22 | 189.06 | 320.17 |
| 0.16 | 38986.95  | 74302.99  | 128598.88  | 236157.19  | 0.57 | 62.90  | 106.54 | 169.57 | 286.04 |
| 0.17 | 29559.51  | 56668.79  | 98868.07   | 181549.73  | 0.58 | 56.42  | 94.94  | 150.04 | 252.79 |
| 0.18 | 23050.59  | 44272.67  | 76613.99   | 137923.82  | 0.59 | 50.94  | 84.83  | 133.07 | 227.30 |
| 0.19 | 17841.51  | 34724.51  | 58711.65   | 106919.44  | 0.60 | 45.79  | 76.23  | 119.42 | 201.92 |
| 0.20 | 14217.07  | 27104.14  | 46129.98   | 85808.72   | 0.61 | 41.10  | 68.70  | 106.63 | 179.91 |
| 0.21 | 11350.65  | 21661.90  | 36827.40   | 68591.93   | 0.62 | 37.02  | 61.38  | 95.69  | 159.06 |
| 0.22 | 9067.23   | 17351.81  | 29319.40   | 53991.14   | 0.63 | 33.23  | 54.74  | 85.58  | 140.53 |
| 0.23 | 7322.10   | 13923.76  | 23853.36   | 43894.47   | 0.64 | 29.98  | 49.46  | 76.11  | 125.15 |
| 0.24 | 5978.23   | 11242.16  | 19472.87   | 35722.89   | 0.65 | 27.03  | 44.46  | 67.69  | 111.64 |
| 0.25 | 4893.94   | 9251.86   | 15902.12   | 29162.08   | 0.66 | 24.39  | 39.82  | 60.10  | 99.59  |
| 0.26 | 4070.23   | 7679.76   | 13166.91   | 23789.50   | 0.67 | 22.05  | 35.64  | 53.73  | 88.99  |
| 0.27 | 3384.30   | 6366.34   | 10937.37   | 19696.51   | 0.68 | 19.82  | 31.71  | 47.98  | 77.77  |
| 0.28 | 2845.45   | 5327.67   | 9130.94    | 16400.65   | 0.69 | 17.88  | 28.29  | 42.82  | 68.24  |
| 0.29 | 2387.42   | 4453.27   | 7706.64    | 13843.23   | 0.70 | 16.06  | 25.46  | 38.15  | 60.56  |
| 0.30 | 2021.59   | 3772.64   | 6467.95    | 11712.08   | 0.71 | 14.37  | 22.82  | 33.75  | 53.02  |
| 0.31 | 1715.07   | 3208.92   | 5417.29    | 9811.97    | 0.72 | 12.95  | 20.42  | 30.08  | 46.42  |
| 0.32 | 1469.33   | 2730.71   | 4596.51    | 8277.94    | 0.73 | 11.65  | 18.27  | 26.76  | 40.76  |
| 0.33 | 1262.71   | 2325.99   | 3879.70    | 7147.96    | 0.74 | 10.47  | 16.27  | 23.66  | 36.01  |
| 0.34 | 1087.46   | 1993.91   | 3338.84    | 6084.73    | 0.75 | 9.35   | 14.52  | 21.04  | 31.92  |
| 0.35 | 935.67    | 1740.51   | 2897.75    | 5272.05    | 0.76 | 8.38   | 12.93  | 18.60  | 28.42  |
| 0.36 | 814.80    | 1493.92   | 2511.69    | 4499.03    | 0.77 | 7.48   | 11.51  | 16.49  | 25.11  |
| 0.37 | 708.12    | 1286.57   | 2163.66    | 3821.71    | 0.78 | 6.68   | 10.20  | 14.66  | 21.87  |
| 0.38 | 615.93    | 1119.60   | 1875.90    | 3327.79    | 0.79 | 5.96   | 9.03   | 12.89  | 19.13  |
| 0.39 | 537.09    | 974.14    | 1612.24    | 2922.10    | 0.80 | 5.32   | 8.00   | 11.33  | 16.73  |
| 0.40 | 469.76    | 842.79    | 1403.91    | 2508.50    | 0.81 | 4.74   | 7.07   | 9.97   | 14.59  |
| 0.41 | 410.03    | 734.59    | 1218.65    | 2192.25    | 0.82 | 4.20   | 6.20   | 8.71   | 12.60  |
| 0.42 | 360.13    | 646.26    | 1070.59    | 1884.25    | 0.83 | 3.72   | 5.44   | 7.61   | 10.85  |
| 0.43 | 316.70    | 564.19    | 933.89     | 1664.32    | 0.84 | 3.27   | 4.78   | 6.63   | 9.35   |
| 0.44 | 278.54    | 494.28    | 814.01     | 1445.41    | 0.85 | 2.87   | 4.18   | 5.74   | 8.02   |
| 0.45 | 247.74    | 436.81    | 711.69     | 1265.09    | 0.86 | 2.50   | 3.63   | 4.96   | 6.90   |
| 0.46 | 221.22    | 385.37    | 627.45     | 1098.10    | 0.87 | 2.18   | 3.13   | 4.25   | 5.90   |
| 0.47 | 195.37    | 337.54    | 552.08     | 964.29     | 0.88 | 1.88   | 2.70   | 3.61   | 5.01   |
| 0.48 | 173.63    | 301.51    | 489.17     | 849.96     | 0.89 | 1.63   | 2.31   | 3.06   | 4.21   |
| 0.49 | 154.96    | 267.60    | 432.69     | 745.02     | 0.90 | 1.39   | 1.96   | 2.58   | 3.50   |
| 0.50 | 138.08    | 239.19    | 382.36     | 667.18     |      |        |        |        |        |

Table S307: Critical values for detector  $\hat{H}_{mov,sn}^{m,0.1}$  with windows size  $n = 0.1$ , and IM-OLS estimation in a model with intercept. The number of integrated regressors is 1 and the highest power of  $x_{kt}$  is 1.

| m    | 90 %      | 95 %      | 97,5 %    | 99 %      | m    | 90 %  | 95 %  | 97,5 % | 99 %   |
|------|-----------|-----------|-----------|-----------|------|-------|-------|--------|--------|
| 0.10 | 139233.92 | 272526.42 | 477008.22 | 890978.15 | 0.51 | 57.87 | 98.83 | 157.01 | 268.00 |
| 0.11 | 91350.06  | 177982.32 | 309555.10 | 568830.63 | 0.52 | 51.65 | 87.60 | 138.15 | 233.77 |
| 0.12 | 62860.54  | 123305.91 | 214191.64 | 403750.08 | 0.53 | 46.20 | 77.17 | 122.29 | 205.34 |
| 0.13 | 44565.51  | 86800.78  | 152021.38 | 275879.12 | 0.54 | 41.30 | 69.33 | 108.70 | 187.16 |
| 0.14 | 32115.93  | 62156.34  | 108328.30 | 203005.05 | 0.55 | 36.68 | 62.26 | 96.81  | 161.87 |
| 0.15 | 23503.14  | 44899.56  | 77913.44  | 142815.47 | 0.56 | 32.77 | 55.37 | 87.31  | 146.50 |
| 0.16 | 17806.50  | 34194.07  | 57968.24  | 108275.01 | 0.57 | 29.37 | 49.60 | 77.26  | 128.23 |
| 0.17 | 13483.22  | 26065.62  | 44853.42  | 80906.18  | 0.58 | 26.24 | 44.17 | 69.11  | 112.49 |
| 0.18 | 10378.88  | 20310.10  | 35002.46  | 63108.87  | 0.59 | 23.62 | 39.66 | 62.30  | 102.02 |
| 0.19 | 8138.86   | 15622.83  | 27445.79  | 49720.60  | 0.60 | 21.21 | 35.58 | 55.25  | 91.74  |
| 0.20 | 6429.22   | 12307.16  | 21038.54  | 39185.62  | 0.61 | 18.98 | 31.89 | 48.91  | 79.55  |
| 0.21 | 5206.21   | 9903.24   | 17136.81  | 32060.56  | 0.62 | 17.06 | 28.36 | 43.21  | 71.43  |
| 0.22 | 4171.71   | 7967.18   | 13591.48  | 25355.91  | 0.63 | 15.18 | 25.11 | 38.00  | 62.66  |
| 0.23 | 3418.61   | 6442.23   | 10993.21  | 20220.06  | 0.64 | 13.46 | 21.99 | 33.56  | 55.03  |
| 0.24 | 2774.94   | 5192.31   | 9018.73   | 16473.97  | 0.65 | 12.07 | 19.84 | 30.46  | 48.78  |
| 0.25 | 2285.00   | 4346.38   | 7441.41   | 13652.52  | 0.66 | 10.72 | 17.78 | 27.00  | 43.67  |
| 0.26 | 1908.49   | 3603.92   | 6072.34   | 10813.15  | 0.67 | 9.55  | 15.70 | 23.65  | 37.08  |
| 0.27 | 1594.46   | 2979.35   | 5051.33   | 8931.42   | 0.68 | 8.53  | 14.00 | 21.08  | 33.42  |
| 0.28 | 1336.85   | 2483.67   | 4174.62   | 7372.59   | 0.69 | 7.61  | 12.32 | 18.54  | 28.66  |
| 0.29 | 1130.49   | 2107.65   | 3545.32   | 6225.09   | 0.70 | 6.76  | 10.90 | 16.23  | 25.79  |
| 0.30 | 947.61    | 1775.23   | 2933.76   | 5242.62   | 0.71 | 5.99  | 9.64  | 14.27  | 22.39  |
| 0.31 | 810.05    | 1506.71   | 2476.22   | 4409.06   | 0.72 | 5.35  | 8.51  | 12.59  | 19.89  |
| 0.32 | 701.55    | 1280.21   | 2133.01   | 3896.69   | 0.73 | 4.75  | 7.59  | 11.15  | 17.47  |
| 0.33 | 598.69    | 1087.32   | 1864.03   | 3252.95   | 0.74 | 4.15  | 6.66  | 9.74   | 15.27  |
| 0.34 | 521.10    | 932.72    | 1584.69   | 2799.16   | 0.75 | 3.66  | 5.82  | 8.49   | 12.96  |
| 0.35 | 444.69    | 804.62    | 1355.48   | 2411.28   | 0.76 | 3.19  | 5.06  | 7.36   | 11.20  |
| 0.36 | 383.56    | 698.04    | 1157.41   | 2065.52   | 0.77 | 2.81  | 4.46  | 6.42   | 9.62   |
| 0.37 | 335.88    | 602.29    | 1005.77   | 1766.91   | 0.78 | 2.44  | 3.83  | 5.55   | 8.41   |
| 0.38 | 290.19    | 521.42    | 848.10    | 1531.55   | 0.79 | 2.09  | 3.29  | 4.78   | 7.24   |
| 0.39 | 254.38    | 452.28    | 740.28    | 1297.60   | 0.80 | 1.82  | 2.83  | 4.09   | 6.17   |
| 0.40 | 223.13    | 394.64    | 636.87    | 1120.85   | 0.81 | 1.55  | 2.42  | 3.53   | 5.31   |
| 0.41 | 195.45    | 345.10    | 557.75    | 981.64    | 0.82 | 1.34  | 2.08  | 2.99   | 4.54   |
| 0.42 | 170.71    | 302.48    | 489.24    | 838.74    | 0.83 | 1.17  | 1.75  | 2.51   | 3.77   |
| 0.43 | 150.86    | 263.70    | 429.65    | 733.94    | 0.84 | 1.03  | 1.49  | 2.12   | 3.16   |
| 0.44 | 132.87    | 233.35    | 375.10    | 646.97    | 0.85 | 0.92  | 1.24  | 1.75   | 2.57   |
| 0.45 | 116.85    | 205.65    | 330.93    | 560.98    | 0.86 | 0.82  | 1.08  | 1.48   | 2.17   |
| 0.46 | 103.83    | 181.95    | 291.52    | 496.50    | 0.87 | 0.74  | 0.95  | 1.23   | 1.79   |
| 0.47 | 92.72     | 158.98    | 255.37    | 440.82    | 0.88 | 0.67  | 0.84  | 1.04   | 1.48   |
| 0.48 | 81.32     | 139.33    | 225.85    | 397.72    | 0.89 | 0.62  | 0.76  | 0.91   | 1.18   |
| 0.49 | 72.41     | 125.79    | 201.48    | 339.61    | 0.90 | 0.57  | 0.69  | 0.82   | 1.00   |
| 0.50 | 64.85     | 111.79    | 179.13    | 305.21    |      |       |       |        |        |

Table S308: Critical values for detector  $\hat{H}_{mov,sn}^{m,0.2}$  with windows size  $n = 0.2$ , and FM-OLS and D-OLS estimation in a model with intercept. The number of integrated regressors is 1 and the highest power of  $x_{kt}$  is 1.

| m    | 90 %      | 95 %      | 97,5 %     | 99 %       | m    | 90 %   | 95 %   | 97,5 % | 99 %   |
|------|-----------|-----------|------------|------------|------|--------|--------|--------|--------|
| 0.10 | 493303.98 | 969769.73 | 1679520.06 | 3100883.98 | 0.51 | 188.29 | 324.65 | 520.91 | 900.75 |
| 0.11 | 323927.43 | 638446.89 | 1111873.80 | 2049605.27 | 0.52 | 166.87 | 288.65 | 458.37 | 787.94 |
| 0.12 | 221966.85 | 435256.11 | 761355.30  | 1435942.69 | 0.53 | 147.00 | 255.91 | 408.29 | 684.64 |
| 0.13 | 156318.91 | 305443.65 | 532672.58  | 990219.08  | 0.54 | 130.86 | 227.64 | 360.98 | 608.05 |
| 0.14 | 111895.52 | 219732.57 | 385514.38  | 721525.20  | 0.55 | 117.35 | 202.34 | 320.45 | 540.69 |
| 0.15 | 82431.99  | 160367.90 | 281177.37  | 525229.82  | 0.56 | 105.00 | 178.72 | 283.98 | 477.18 |
| 0.16 | 61970.73  | 119540.08 | 208348.89  | 382927.21  | 0.57 | 93.67  | 159.29 | 251.92 | 423.37 |
| 0.17 | 46988.43  | 91092.05  | 159567.14  | 295792.76  | 0.58 | 83.96  | 141.66 | 223.87 | 373.80 |
| 0.18 | 36599.69  | 71077.69  | 124009.85  | 226205.41  | 0.59 | 75.50  | 126.33 | 197.55 | 332.84 |
| 0.19 | 28490.29  | 56064.43  | 95158.75   | 174694.37  | 0.60 | 67.57  | 112.71 | 176.67 | 296.61 |
| 0.20 | 22558.10  | 43426.95  | 75010.61   | 139793.13  | 0.61 | 60.38  | 100.73 | 155.14 | 262.73 |
| 0.21 | 18090.18  | 34810.90  | 59649.42   | 111325.55  | 0.62 | 54.03  | 89.34  | 139.45 | 230.52 |
| 0.22 | 14368.14  | 27969.95  | 47614.05   | 87504.50   | 0.63 | 48.30  | 79.61  | 124.44 | 201.67 |
| 0.23 | 11667.80  | 22365.24  | 38473.51   | 71612.44   | 0.64 | 43.29  | 71.87  | 110.14 | 178.43 |
| 0.24 | 9504.19   | 18051.24  | 31272.42   | 57807.18   | 0.65 | 38.85  | 64.07  | 97.07  | 158.35 |
| 0.25 | 7779.35   | 14787.65  | 25773.47   | 47387.15   | 0.66 | 35.14  | 57.19  | 86.19  | 140.83 |
| 0.26 | 6438.62   | 12362.36  | 21238.12   | 38663.08   | 0.67 | 31.48  | 50.75  | 76.41  | 123.94 |
| 0.27 | 5367.37   | 10203.52  | 17602.59   | 32032.94   | 0.68 | 28.09  | 44.88  | 67.46  | 109.25 |
| 0.28 | 4502.89   | 8522.25   | 14620.78   | 26604.90   | 0.69 | 25.03  | 39.95  | 59.89  | 94.44  |
| 0.29 | 3787.36   | 7133.49   | 12369.09   | 22406.53   | 0.70 | 22.37  | 35.52  | 52.77  | 81.95  |
| 0.30 | 3197.71   | 6027.69   | 10404.21   | 18949.62   | 0.71 | 19.88  | 31.58  | 46.51  | 71.75  |
| 0.31 | 2722.73   | 5119.49   | 8717.68    | 15919.68   | 0.72 | 17.81  | 27.87  | 41.00  | 62.61  |
| 0.32 | 2317.73   | 4364.05   | 7342.99    | 13424.58   | 0.73 | 15.84  | 24.71  | 36.02  | 54.77  |
| 0.33 | 1989.50   | 3701.73   | 6220.14    | 11408.03   | 0.74 | 14.10  | 21.91  | 31.62  | 47.71  |
| 0.34 | 1709.00   | 3160.65   | 5328.22    | 9782.97    | 0.75 | 12.56  | 19.39  | 27.75  | 42.02  |
| 0.35 | 1475.70   | 2756.31   | 4610.96    | 8444.32    | 0.76 | 11.16  | 17.17  | 24.30  | 36.45  |
| 0.36 | 1278.69   | 2360.86   | 3986.17    | 7135.73    | 0.77 | 9.83   | 15.02  | 21.27  | 31.82  |
| 0.37 | 1113.33   | 2040.09   | 3434.31    | 6106.21    | 0.78 | 8.68   | 13.15  | 18.66  | 27.61  |
| 0.38 | 965.89    | 1759.00   | 2965.51    | 5302.10    | 0.79 | 7.65   | 11.51  | 16.27  | 23.75  |
| 0.39 | 839.39    | 1526.43   | 2547.54    | 4597.58    | 0.80 | 6.73   | 10.05  | 14.12  | 20.44  |
| 0.40 | 732.22    | 1329.00   | 2216.82    | 3941.75    | 0.81 | 5.92   | 8.73   | 12.21  | 17.65  |
| 0.41 | 637.86    | 1148.71   | 1911.63    | 3414.65    | 0.82 | 5.15   | 7.59   | 10.48  | 15.00  |
| 0.42 | 559.05    | 1002.79   | 1679.30    | 2955.97    | 0.83 | 4.50   | 6.53   | 8.95   | 12.79  |
| 0.43 | 489.85    | 879.64    | 1451.86    | 2608.98    | 0.84 | 3.90   | 5.63   | 7.69   | 10.74  |
| 0.44 | 431.56    | 767.82    | 1266.50    | 2264.97    | 0.85 | 3.37   | 4.83   | 6.58   | 9.10   |
| 0.45 | 382.80    | 679.26    | 1109.89    | 1965.08    | 0.86 | 2.90   | 4.14   | 5.58   | 7.61   |
| 0.46 | 339.56    | 595.95    | 966.87     | 1687.03    | 0.87 | 2.50   | 3.53   | 4.71   | 6.42   |
| 0.47 | 300.69    | 522.31    | 855.05     | 1477.62    | 0.88 | 2.14   | 3.00   | 3.95   | 5.37   |
| 0.48 | 266.71    | 463.94    | 755.90     | 1296.75    | 0.89 | 1.82   | 2.54   | 3.30   | 4.49   |
| 0.49 | 237.01    | 411.81    | 661.91     | 1138.92    | 0.90 | 1.55   | 2.13   | 2.75   | 3.69   |
| 0.50 | 210.44    | 364.63    | 583.55     | 1018.24    |      |        |        |        |        |

Table S309: Critical values for detector  $\hat{H}_{mov,sn}^{m,0.2}$  with windows size  $n = 0.2$ , and IM-OLS estimation in a model with intercept. The number of integrated regressors is 1 and the highest power of  $x_{kt}$  is 1.

| m    | 90 %      | 95 %      | 97,5 %    | 99 %       | m    | 90 %  | 95 %   | 97,5 % | 99 %   |
|------|-----------|-----------|-----------|------------|------|-------|--------|--------|--------|
| 0.10 | 167875.68 | 329371.01 | 589284.42 | 1102776.35 | 0.51 | 66.61 | 113.31 | 180.80 | 309.09 |
| 0.11 | 109989.61 | 217364.76 | 380429.09 | 701729.92  | 0.52 | 59.36 | 100.48 | 158.91 | 268.42 |
| 0.12 | 75905.21  | 150658.35 | 262297.61 | 498070.09  | 0.53 | 52.88 | 88.65  | 139.73 | 235.25 |
| 0.13 | 53685.81  | 105894.31 | 187030.86 | 341789.92  | 0.54 | 47.01 | 79.28  | 123.67 | 212.34 |
| 0.14 | 38799.56  | 75787.87  | 133371.84 | 250990.32  | 0.55 | 41.81 | 70.77  | 110.06 | 183.43 |
| 0.15 | 28405.13  | 54609.78  | 95476.54  | 175674.16  | 0.56 | 37.23 | 62.75  | 98.35  | 164.04 |
| 0.16 | 21462.43  | 41681.85  | 70943.14  | 133513.52  | 0.57 | 33.22 | 56.16  | 87.30  | 143.44 |
| 0.17 | 16315.07  | 31839.58  | 54915.99  | 99467.47   | 0.58 | 29.55 | 49.64  | 77.17  | 124.80 |
| 0.18 | 12569.39  | 24606.90  | 42794.33  | 78001.18   | 0.59 | 26.43 | 44.48  | 69.61  | 113.11 |
| 0.19 | 9822.86   | 19043.39  | 33578.32  | 60875.15   | 0.60 | 23.70 | 39.59  | 61.57  | 101.03 |
| 0.20 | 7781.04   | 14952.29  | 25778.67  | 48077.75   | 0.61 | 21.08 | 35.31  | 54.10  | 87.27  |
| 0.21 | 6298.96   | 12094.08  | 20817.67  | 39234.71   | 0.62 | 18.79 | 31.23  | 47.51  | 78.08  |
| 0.22 | 5049.99   | 9720.21   | 16552.28  | 30972.26   | 0.63 | 16.69 | 27.47  | 41.65  | 68.49  |
| 0.23 | 4118.99   | 7848.34   | 13388.60  | 24712.42   | 0.64 | 14.72 | 24.05  | 36.52  | 59.59  |
| 0.24 | 3338.04   | 6315.79   | 10962.45  | 20235.17   | 0.65 | 13.13 | 21.55  | 32.92  | 52.63  |
| 0.25 | 2753.89   | 5270.10   | 9078.41   | 16679.04   | 0.66 | 11.59 | 19.12  | 28.89  | 46.60  |
| 0.26 | 2304.94   | 4367.54   | 7427.42   | 13124.02   | 0.67 | 10.23 | 16.82  | 25.22  | 39.45  |
| 0.27 | 1917.08   | 3602.13   | 6157.30   | 10785.25   | 0.68 | 9.10  | 14.86  | 22.39  | 35.35  |
| 0.28 | 1610.65   | 2985.06   | 5041.84   | 8991.85    | 0.69 | 8.03  | 13.04  | 19.49  | 30.14  |
| 0.29 | 1358.89   | 2549.32   | 4311.42   | 7591.61    | 0.70 | 7.09  | 11.40  | 17.00  | 26.72  |
| 0.30 | 1135.77   | 2131.17   | 3554.87   | 6348.99    | 0.71 | 6.26  | 10.01  | 14.81  | 23.06  |
| 0.31 | 968.99    | 1819.46   | 3003.29   | 5382.18    | 0.72 | 5.55  | 8.79   | 13.02  | 20.60  |
| 0.32 | 839.27    | 1541.03   | 2574.59   | 4711.67    | 0.73 | 4.90  | 7.81   | 11.42  | 17.88  |
| 0.33 | 717.57    | 1307.60   | 2228.26   | 3917.20    | 0.74 | 4.27  | 6.84   | 9.93   | 15.52  |
| 0.34 | 622.44    | 1122.21   | 1892.18   | 3347.27    | 0.75 | 3.76  | 5.94   | 8.63   | 13.15  |
| 0.35 | 530.22    | 960.94    | 1619.19   | 2895.75    | 0.76 | 3.28  | 5.17   | 7.46   | 11.32  |
| 0.36 | 457.07    | 834.61    | 1382.29   | 2480.10    | 0.77 | 2.89  | 4.53   | 6.51   | 9.73   |
| 0.37 | 399.47    | 715.91    | 1195.44   | 2116.93    | 0.78 | 2.51  | 3.91   | 5.64   | 8.50   |
| 0.38 | 343.53    | 620.56    | 1012.08   | 1813.85    | 0.79 | 2.17  | 3.37   | 4.86   | 7.34   |
| 0.39 | 300.94    | 537.52    | 878.69    | 1541.12    | 0.80 | 1.91  | 2.92   | 4.19   | 6.26   |
| 0.40 | 263.75    | 468.18    | 758.78    | 1327.79    | 0.81 | 1.67  | 2.52   | 3.64   | 5.40   |
| 0.41 | 230.62    | 407.93    | 658.63    | 1155.93    | 0.82 | 1.50  | 2.19   | 3.10   | 4.65   |
| 0.42 | 201.81    | 358.51    | 575.28    | 989.90     | 0.83 | 1.37  | 1.87   | 2.63   | 3.87   |
| 0.43 | 177.12    | 312.42    | 506.04    | 871.19     | 0.84 | 1.25  | 1.61   | 2.23   | 3.29   |
| 0.44 | 155.85    | 273.21    | 440.98    | 758.32     | 0.85 | 1.15  | 1.39   | 1.88   | 2.71   |
| 0.45 | 136.65    | 241.81    | 389.95    | 663.53     | 0.86 | 1.07  | 1.26   | 1.61   | 2.29   |
| 0.46 | 121.05    | 212.47    | 341.18    | 573.81     | 0.87 | 1.00  | 1.15   | 1.36   | 1.92   |
| 0.47 | 107.74    | 184.96    | 297.66    | 509.60     | 0.88 | 0.93  | 1.07   | 1.22   | 1.61   |
| 0.48 | 94.61     | 162.41    | 263.08    | 459.84     | 0.89 | 0.87  | 0.99   | 1.11   | 1.32   |
| 0.49 | 83.70     | 146.00    | 232.56    | 393.79     | 0.90 | 0.81  | 0.93   | 1.03   | 1.16   |
| 0.50 | 74.90     | 129.94    | 206.83    | 350.04     |      |       |        |        |        |

Table S310: Critical values for detector  $\hat{H}_{mov,sn}^{m,0.3}$  with windows size  $n = 0.3$ , and FM-OLS and D-OLS estimation in a model with intercept. The number of integrated regressors is 1 and the highest power of  $x_{kt}$  is 1.

| m    | 90 %      | 95 %       | 97,5 %     | 99 %       | m    | 90 %   | 95 %   | 97,5 % | 99 %    |
|------|-----------|------------|------------|------------|------|--------|--------|--------|---------|
| 0.10 | 596787.62 | 1181910.02 | 2069253.94 | 3807148.94 | 0.51 | 217.49 | 374.95 | 598.41 | 1032.90 |
| 0.11 | 392606.41 | 775158.91  | 1364121.47 | 2528974.37 | 0.52 | 192.43 | 333.39 | 530.26 | 902.41  |
| 0.12 | 268700.36 | 531022.67  | 939296.94  | 1778936.60 | 0.53 | 169.47 | 294.61 | 468.67 | 784.78  |
| 0.13 | 188971.34 | 372932.51  | 655452.37  | 1232207.83 | 0.54 | 150.56 | 260.47 | 412.22 | 687.59  |
| 0.14 | 135262.04 | 267474.53  | 472139.59  | 890265.72  | 0.55 | 134.37 | 231.93 | 365.31 | 605.07  |
| 0.15 | 99775.98  | 195520.42  | 345542.10  | 651009.01  | 0.56 | 119.76 | 203.94 | 321.46 | 534.55  |
| 0.16 | 75320.84  | 145453.74  | 255451.78  | 478107.00  | 0.57 | 106.51 | 180.94 | 284.47 | 475.13  |
| 0.17 | 56991.56  | 110915.35  | 195058.75  | 363342.34  | 0.58 | 95.35  | 160.37 | 251.05 | 419.05  |
| 0.18 | 44339.00  | 87018.75   | 152156.04  | 279694.03  | 0.59 | 85.41  | 142.67 | 221.44 | 370.00  |
| 0.19 | 34508.10  | 68293.55   | 116524.37  | 215090.29  | 0.60 | 76.07  | 126.76 | 196.75 | 327.57  |
| 0.20 | 27373.19  | 53102.64   | 92054.14   | 171189.30  | 0.61 | 67.83  | 112.56 | 172.92 | 286.81  |
| 0.21 | 21824.90  | 42395.82   | 73427.66   | 136191.57  | 0.62 | 60.29  | 99.15  | 154.07 | 252.30  |
| 0.22 | 17404.49  | 34088.62   | 58203.59   | 107378.99  | 0.63 | 53.89  | 88.10  | 137.06 | 220.16  |
| 0.23 | 14091.80  | 27228.35   | 47082.89   | 87512.48   | 0.64 | 48.03  | 78.84  | 120.63 | 193.27  |
| 0.24 | 11538.17  | 21964.31   | 38256.09   | 70781.17   | 0.65 | 42.88  | 70.13  | 106.13 | 171.77  |
| 0.25 | 9434.07   | 18015.29   | 31589.02   | 57947.12   | 0.66 | 38.61  | 62.12  | 93.29  | 151.12  |
| 0.26 | 7775.74   | 15005.62   | 25963.92   | 46686.04   | 0.67 | 34.41  | 54.96  | 82.53  | 132.29  |
| 0.27 | 6460.12   | 12372.28   | 21383.43   | 39228.92   | 0.68 | 30.68  | 48.43  | 72.27  | 116.18  |
| 0.28 | 5414.99   | 10318.23   | 17718.82   | 32253.14   | 0.69 | 27.09  | 42.90  | 63.85  | 100.06  |
| 0.29 | 4548.49   | 8642.93    | 14992.89   | 27121.16   | 0.70 | 24.00  | 37.97  | 55.94  | 85.83   |
| 0.30 | 3844.99   | 7280.25    | 12605.05   | 22959.23   | 0.71 | 21.22  | 33.43  | 48.98  | 74.63   |
| 0.31 | 3267.71   | 6166.31    | 10592.20   | 19249.09   | 0.72 | 18.85  | 29.41  | 42.84  | 65.44   |
| 0.32 | 2781.00   | 5276.13    | 8856.20    | 16233.51   | 0.73 | 16.69  | 25.92  | 37.49  | 56.49   |
| 0.33 | 2388.76   | 4456.95    | 7467.65    | 13835.62   | 0.74 | 14.76  | 22.80  | 32.69  | 49.14   |
| 0.34 | 2049.61   | 3804.85    | 6419.93    | 11752.43   | 0.75 | 13.07  | 20.06  | 28.55  | 43.02   |
| 0.35 | 1766.58   | 3299.64    | 5534.14    | 10177.94   | 0.76 | 11.56  | 17.69  | 24.85  | 37.02   |
| 0.36 | 1526.01   | 2820.76    | 4785.31    | 8518.26    | 0.77 | 10.15  | 15.40  | 21.72  | 32.28   |
| 0.37 | 1327.37   | 2437.65    | 4106.48    | 7320.96    | 0.78 | 8.91   | 13.41  | 18.95  | 27.86   |
| 0.38 | 1150.73   | 2101.30    | 3536.82    | 6263.72    | 0.79 | 7.85   | 11.71  | 16.48  | 23.97   |
| 0.39 | 999.07    | 1810.86    | 3031.15    | 5448.09    | 0.80 | 6.88   | 10.21  | 14.28  | 20.57   |
| 0.40 | 871.98    | 1574.82    | 2635.05    | 4679.89    | 0.81 | 6.04   | 8.86   | 12.34  | 17.75   |
| 0.41 | 754.86    | 1367.79    | 2264.80    | 4065.61    | 0.82 | 5.26   | 7.69   | 10.60  | 15.14   |
| 0.42 | 660.28    | 1185.95    | 1983.59    | 3464.99    | 0.83 | 4.60   | 6.63   | 9.06   | 12.91   |
| 0.43 | 577.50    | 1033.25    | 1716.55    | 3072.04    | 0.84 | 4.00   | 5.73   | 7.79   | 10.84   |
| 0.44 | 508.92    | 908.13     | 1498.55    | 2665.54    | 0.85 | 3.47   | 4.94   | 6.68   | 9.19    |
| 0.45 | 448.99    | 796.92     | 1304.47    | 2297.87    | 0.86 | 2.99   | 4.24   | 5.69   | 7.72    |
| 0.46 | 397.93    | 699.85     | 1134.33    | 1969.37    | 0.87 | 2.59   | 3.63   | 4.81   | 6.52    |
| 0.47 | 352.06    | 611.33     | 990.49     | 1712.59    | 0.88 | 2.24   | 3.10   | 4.05   | 5.50    |
| 0.48 | 311.25    | 541.40     | 876.36     | 1502.69    | 0.89 | 1.92   | 2.64   | 3.41   | 4.60    |
| 0.49 | 275.61    | 478.14     | 767.11     | 1318.44    | 0.90 | 1.66   | 2.24   | 2.86   | 3.80    |
| 0.50 | 245.12    | 423.87     | 671.12     | 1175.03    |      |        |        |        |         |

Table S311: Critical values for detector  $\hat{H}_{mov,sn}^{m,0.3}$  with windows size  $n = 0.3$ , and IM-OLS estimation in a model with intercept. The number of integrated regressors is 1 and the highest power of  $x_{kt}$  is 1.



| m    | 90 %       | 95 %       | 97,5 %      | 99 %        | m    | 90 %   | 95 %   | 97,5 % | 99 %   |
|------|------------|------------|-------------|-------------|------|--------|--------|--------|--------|
| 0.10 | 4382771.20 | 7327991.29 | 11362676.64 | 18895283.79 | 0.51 | 237.60 | 382.32 | 578.78 | 936.24 |
| 0.11 | 2566151.59 | 4272230.32 | 6601597.24  | 11096649.70 | 0.52 | 206.84 | 332.55 | 498.37 | 776.98 |
| 0.12 | 1564888.75 | 2627598.13 | 4029590.56  | 6637859.97  | 0.53 | 177.70 | 286.98 | 429.89 | 675.53 |
| 0.13 | 1001126.55 | 1668100.16 | 2591326.77  | 4291667.44  | 0.54 | 156.43 | 250.89 | 371.43 | 592.51 |
| 0.14 | 663422.62  | 1093709.04 | 1715630.81  | 2822732.14  | 0.55 | 135.91 | 218.94 | 324.84 | 516.24 |
| 0.15 | 449375.43  | 747022.46  | 1150045.61  | 1891215.26  | 0.56 | 119.29 | 191.44 | 285.27 | 445.69 |
| 0.16 | 309849.78  | 515883.73  | 795741.72   | 1294708.09  | 0.57 | 103.14 | 166.47 | 249.10 | 385.85 |
| 0.17 | 220106.90  | 366726.84  | 563322.75   | 930280.76   | 0.58 | 90.09  | 145.80 | 217.36 | 337.02 |
| 0.18 | 157032.03  | 262484.38  | 407566.12   | 674926.90   | 0.59 | 79.17  | 126.53 | 188.34 | 294.94 |
| 0.19 | 115291.89  | 190530.86  | 297117.17   | 491959.00   | 0.60 | 68.65  | 110.10 | 161.73 | 258.51 |
| 0.20 | 85841.74   | 142784.71  | 219797.19   | 366290.53   | 0.61 | 59.88  | 95.37  | 140.55 | 224.62 |
| 0.21 | 64995.71   | 107450.11  | 164046.71   | 271790.28   | 0.62 | 52.21  | 83.36  | 122.70 | 193.55 |
| 0.22 | 49437.39   | 82377.51   | 126736.16   | 209911.60   | 0.63 | 45.30  | 72.74  | 106.44 | 167.03 |
| 0.23 | 38271.82   | 63912.48   | 98185.79    | 163202.97   | 0.64 | 39.49  | 62.77  | 92.20  | 142.45 |
| 0.24 | 29789.05   | 49496.47   | 77376.17    | 125528.23   | 0.65 | 34.72  | 54.63  | 80.45  | 123.52 |
| 0.25 | 23499.11   | 38820.28   | 59854.04    | 99780.86    | 0.66 | 30.42  | 47.79  | 69.97  | 106.88 |
| 0.26 | 18505.76   | 30771.63   | 47810.48    | 77373.51    | 0.67 | 26.38  | 41.83  | 60.74  | 93.13  |
| 0.27 | 14828.90   | 24436.01   | 37976.97    | 62917.49    | 0.68 | 23.15  | 36.67  | 53.30  | 79.75  |
| 0.28 | 11955.17   | 19635.57   | 30565.34    | 50181.76    | 0.69 | 20.31  | 31.91  | 46.25  | 69.47  |
| 0.29 | 9649.47    | 15957.53   | 24552.35    | 39466.73    | 0.70 | 17.70  | 27.52  | 39.68  | 60.00  |
| 0.30 | 7848.22    | 12920.44   | 19539.17    | 32476.94    | 0.71 | 15.29  | 23.82  | 34.55  | 51.99  |
| 0.31 | 6378.28    | 10585.40   | 16373.09    | 26720.11    | 0.72 | 13.39  | 20.76  | 30.21  | 45.62  |
| 0.32 | 5237.79    | 8679.56    | 13319.20    | 22045.17    | 0.73 | 11.63  | 17.98  | 26.04  | 39.65  |
| 0.33 | 4360.65    | 7151.78    | 10991.96    | 17887.47    | 0.74 | 10.07  | 15.51  | 22.42  | 33.80  |
| 0.34 | 3619.20    | 5917.27    | 9084.98     | 14887.51    | 0.75 | 8.70   | 13.51  | 19.32  | 28.84  |
| 0.35 | 3007.80    | 4967.14    | 7592.93     | 12421.34    | 0.76 | 7.56   | 11.72  | 16.73  | 24.78  |
| 0.36 | 2515.28    | 4142.27    | 6358.92     | 10551.67    | 0.77 | 6.52   | 10.05  | 14.31  | 21.41  |
| 0.37 | 2106.42    | 3447.58    | 5308.85     | 8747.07     | 0.78 | 5.59   | 8.64   | 12.22  | 18.12  |
| 0.38 | 1779.80    | 2944.97    | 4495.10     | 7282.62     | 0.79 | 4.79   | 7.39   | 10.48  | 15.56  |
| 0.39 | 1518.74    | 2443.23    | 3753.80     | 6157.24     | 0.80 | 4.07   | 6.25   | 8.95   | 13.29  |
| 0.40 | 1268.56    | 2081.54    | 3136.63     | 5087.54     | 0.81 | 3.50   | 5.35   | 7.56   | 11.06  |
| 0.41 | 1074.06    | 1770.53    | 2679.86     | 4334.09     | 0.82 | 2.96   | 4.54   | 6.39   | 9.42   |
| 0.42 | 916.30     | 1501.18    | 2278.44     | 3690.25     | 0.83 | 2.50   | 3.81   | 5.34   | 7.85   |
| 0.43 | 783.76     | 1281.21    | 1957.11     | 3134.92     | 0.84 | 2.07   | 3.18   | 4.52   | 6.50   |
| 0.44 | 677.16     | 1104.82    | 1682.54     | 2664.64     | 0.85 | 1.71   | 2.58   | 3.67   | 5.32   |
| 0.45 | 576.91     | 946.43     | 1420.66     | 2297.97     | 0.86 | 1.40   | 2.12   | 2.99   | 4.33   |
| 0.46 | 499.72     | 808.91     | 1216.51     | 1958.75     | 0.87 | 1.14   | 1.74   | 2.41   | 3.47   |
| 0.47 | 426.44     | 694.82     | 1047.58     | 1672.93     | 0.88 | 0.92   | 1.38   | 1.93   | 2.74   |
| 0.48 | 368.58     | 598.20     | 899.87      | 1435.09     | 0.89 | 0.73   | 1.09   | 1.51   | 2.16   |
| 0.49 | 320.07     | 512.08     | 768.30      | 1227.50     | 0.90 | 0.59   | 0.84   | 1.17   | 1.66   |
| 0.50 | 273.48     | 443.45     | 669.78      | 1066.57     |      |        |        |        |        |

Table S312: Critical values for detector  $\hat{H}_{mov,sn}^{m,0.1}$  with windows size  $n = 0.1$ , and FM-OLS and D-OLS estimation in a model with intercept and linear trend. The number of integrated regressors is 1 and the highest power of  $x_{kt}$  is 1.

| m    | 90 %        | 95 %        | 97,5 %      | 99 %        | m    | 90 %   | 95 %   | 97,5 %  | 99 %    |
|------|-------------|-------------|-------------|-------------|------|--------|--------|---------|---------|
| 0.10 | 11180060.95 | 19294992.76 | 30608946.96 | 52049770.81 | 0.51 | 592.38 | 967.83 | 1501.63 | 2454.01 |
| 0.11 | 6576157.03  | 11254647.45 | 17878544.96 | 31187545.72 | 0.52 | 513.82 | 841.50 | 1281.30 | 2122.17 |
| 0.12 | 4006222.07  | 6885069.91  | 11152437.91 | 18575419.75 | 0.53 | 444.60 | 728.25 | 1111.28 | 1833.65 |
| 0.13 | 2549465.69  | 4344409.27  | 6956736.37  | 11837249.69 | 0.54 | 386.81 | 633.80 | 956.78  | 1594.56 |
| 0.14 | 1681900.88  | 2877532.56  | 4527279.92  | 7479516.57  | 0.55 | 335.50 | 551.94 | 837.54  | 1379.05 |
| 0.15 | 1144143.41  | 1917528.69  | 3023062.75  | 5111971.97  | 0.56 | 293.07 | 481.26 | 729.28  | 1185.17 |
| 0.16 | 784025.17   | 1345013.61  | 2100290.06  | 3510144.15  | 0.57 | 256.53 | 418.39 | 634.35  | 1033.22 |
| 0.17 | 553405.79   | 946159.43   | 1492241.80  | 2533878.11  | 0.58 | 225.20 | 362.95 | 553.65  | 885.23  |
| 0.18 | 396750.61   | 681654.38   | 1080927.26  | 1823890.91  | 0.59 | 197.39 | 315.58 | 479.62  | 773.87  |
| 0.19 | 289898.53   | 497216.88   | 789372.12   | 1332865.91  | 0.60 | 171.63 | 275.66 | 417.40  | 679.16  |
| 0.20 | 215299.90   | 369813.09   | 591318.73   | 992198.77   | 0.61 | 149.94 | 240.64 | 363.48  | 592.66  |
| 0.21 | 162812.58   | 277687.54   | 442594.95   | 748588.38   | 0.62 | 131.21 | 209.68 | 312.95  | 509.71  |
| 0.22 | 124113.44   | 212126.24   | 334645.66   | 568819.67   | 0.63 | 114.91 | 182.87 | 274.18  | 445.18  |
| 0.23 | 95696.41    | 161901.71   | 254614.50   | 426951.81   | 0.64 | 100.00 | 158.39 | 236.15  | 382.40  |
| 0.24 | 74612.53    | 125455.71   | 197853.26   | 335524.37   | 0.65 | 87.75  | 138.56 | 203.67  | 331.47  |
| 0.25 | 58283.85    | 98786.01    | 154514.62   | 262585.71   | 0.66 | 76.76  | 120.64 | 177.07  | 283.71  |
| 0.26 | 46100.15    | 78351.57    | 121543.99   | 205171.00   | 0.67 | 67.28  | 104.96 | 153.73  | 244.40  |
| 0.27 | 36751.00    | 62316.73    | 97443.64    | 161056.19   | 0.68 | 58.86  | 91.14  | 134.25  | 210.27  |
| 0.28 | 29552.23    | 49949.43    | 79262.31    | 130377.21   | 0.69 | 51.71  | 79.61  | 116.17  | 181.21  |
| 0.29 | 23747.62    | 40339.37    | 63898.52    | 106173.39   | 0.70 | 45.10  | 69.51  | 100.20  | 155.20  |
| 0.30 | 19261.65    | 32845.89    | 51625.75    | 87937.97    | 0.71 | 39.45  | 60.47  | 87.15   | 134.06  |
| 0.31 | 15820.86    | 26752.35    | 42000.91    | 72027.79    | 0.72 | 34.31  | 52.72  | 75.03   | 115.86  |
| 0.32 | 13054.21    | 22013.16    | 34226.81    | 59255.63    | 0.73 | 29.95  | 45.96  | 65.56   | 99.35   |
| 0.33 | 10794.25    | 18105.70    | 28161.11    | 47539.00    | 0.74 | 26.11  | 39.90  | 57.03   | 86.12   |
| 0.34 | 8924.04     | 14944.42    | 23242.11    | 39383.43    | 0.75 | 22.76  | 34.91  | 49.64   | 73.28   |
| 0.35 | 7393.62     | 12455.98    | 19221.06    | 32763.35    | 0.76 | 19.79  | 30.22  | 42.94   | 63.27   |
| 0.36 | 6148.32     | 10341.87    | 16215.14    | 27593.60    | 0.77 | 17.24  | 26.20  | 36.83   | 54.22   |
| 0.37 | 5208.15     | 8689.51     | 13667.03    | 22979.16    | 0.78 | 14.94  | 22.56  | 31.69   | 46.90   |
| 0.38 | 4393.05     | 7344.11     | 11452.68    | 19080.81    | 0.79 | 12.84  | 19.54  | 27.09   | 40.28   |
| 0.39 | 3731.44     | 6181.23     | 9684.35     | 16193.43    | 0.80 | 11.12  | 16.68  | 23.45   | 34.08   |
| 0.40 | 3168.88     | 5269.68     | 8114.57     | 13594.38    | 0.81 | 9.60   | 14.33  | 19.98   | 28.95   |
| 0.41 | 2676.00     | 4472.83     | 6851.61     | 11412.84    | 0.82 | 8.25   | 12.26  | 16.94   | 24.37   |
| 0.42 | 2282.45     | 3788.26     | 5809.58     | 9703.31     | 0.83 | 7.06   | 10.40  | 14.36   | 20.83   |
| 0.43 | 1951.20     | 3230.87     | 4966.61     | 8188.20     | 0.84 | 6.05   | 8.91   | 12.16   | 17.40   |
| 0.44 | 1673.31     | 2786.61     | 4295.13     | 6995.49     | 0.85 | 5.14   | 7.54   | 10.21   | 14.54   |
| 0.45 | 1438.05     | 2383.07     | 3656.53     | 6003.47     | 0.86 | 4.34   | 6.33   | 8.59    | 12.07   |
| 0.46 | 1238.76     | 2033.24     | 3152.26     | 5225.96     | 0.87 | 3.63   | 5.29   | 7.17    | 9.94    |
| 0.47 | 1059.37     | 1761.20     | 2704.89     | 4465.49     | 0.88 | 3.03   | 4.38   | 5.92    | 8.10    |
| 0.48 | 910.35      | 1521.25     | 2339.47     | 3871.78     | 0.89 | 2.50   | 3.60   | 4.84    | 6.55    |
| 0.49 | 786.01      | 1306.42     | 2023.69     | 3259.86     | 0.90 | 2.04   | 2.93   | 3.91    | 5.26    |
| 0.50 | 682.64      | 1122.39     | 1733.94     | 2827.58     |      |        |        |         |         |

Table S313: Critical values for detector  $\hat{H}_{mov,sn}^{m,0.1}$  with windows size  $n = 0.1$ , and IM-OLS estimation in a model with intercept and linear trend. The number of integrated regressors is 1 and the highest power of  $x_{kt}$  is 1.

| m    | 90 %       | 95 %        | 97,5 %      | 99 %        | m    | 90 %   | 95 %   | 97,5 % | 99 %    |
|------|------------|-------------|-------------|-------------|------|--------|--------|--------|---------|
| 0.10 | 5981757.90 | 10102869.78 | 15619307.81 | 26448129.13 | 0.51 | 345.05 | 553.42 | 847.20 | 1353.39 |
| 0.11 | 3548330.02 | 5944035.19  | 9255062.57  | 15610711.03 | 0.52 | 299.65 | 482.72 | 720.56 | 1134.72 |
| 0.12 | 2190358.59 | 3696696.79  | 5706941.98  | 9459106.41  | 0.53 | 255.76 | 413.84 | 619.49 | 981.95  |
| 0.13 | 1413149.98 | 2378434.51  | 3718584.17  | 6220828.04  | 0.54 | 224.06 | 362.09 | 537.77 | 860.81  |
| 0.14 | 944127.04  | 1571848.63  | 2466908.37  | 4125011.87  | 0.55 | 193.71 | 314.22 | 466.49 | 738.93  |
| 0.15 | 643317.94  | 1082465.60  | 1680005.06  | 2784489.13  | 0.56 | 170.20 | 274.07 | 407.76 | 632.62  |
| 0.16 | 449393.25  | 754766.64   | 1165928.93  | 1920153.10  | 0.57 | 146.26 | 237.53 | 354.62 | 550.04  |
| 0.17 | 319971.19  | 536759.60   | 834336.76   | 1380540.84  | 0.58 | 127.46 | 206.59 | 307.25 | 477.11  |
| 0.18 | 229053.84  | 388990.19   | 605743.61   | 1016766.89  | 0.59 | 111.35 | 178.99 | 265.05 | 416.99  |
| 0.19 | 169684.92  | 282237.82   | 443039.22   | 740308.91   | 0.60 | 96.35  | 154.60 | 228.03 | 360.01  |
| 0.20 | 126986.00  | 213703.32   | 330498.73   | 556950.62   | 0.61 | 83.42  | 133.44 | 196.68 | 313.99  |
| 0.21 | 96281.40   | 161401.73   | 246207.28   | 412204.47   | 0.62 | 72.39  | 115.75 | 170.30 | 265.11  |
| 0.22 | 73491.87   | 123485.96   | 192205.55   | 318020.12   | 0.63 | 62.25  | 100.26 | 146.21 | 227.94  |
| 0.23 | 57315.40   | 95954.39    | 148815.55   | 247846.90   | 0.64 | 54.01  | 86.39  | 126.59 | 195.86  |
| 0.24 | 44418.89   | 74713.20    | 116934.92   | 189854.77   | 0.65 | 47.25  | 74.42  | 109.46 | 169.89  |
| 0.25 | 35103.64   | 58767.57    | 91258.76    | 152617.26   | 0.66 | 40.89  | 64.50  | 94.60  | 144.02  |
| 0.26 | 27822.87   | 46555.01    | 72404.55    | 118521.03   | 0.67 | 35.35  | 56.25  | 81.47  | 124.98  |
| 0.27 | 22324.07   | 36868.25    | 57722.28    | 96128.40    | 0.68 | 30.77  | 48.71  | 71.45  | 107.03  |
| 0.28 | 17926.23   | 29785.29    | 46616.92    | 76562.05    | 0.69 | 26.84  | 42.06  | 61.08  | 91.76   |
| 0.29 | 14509.82   | 24111.99    | 37240.85    | 60529.08    | 0.70 | 23.04  | 35.89  | 51.56  | 78.40   |
| 0.30 | 11782.96   | 19533.98    | 29769.18    | 49377.66    | 0.71 | 19.80  | 31.00  | 44.74  | 66.50   |
| 0.31 | 9629.14    | 15992.65    | 24934.49    | 41050.01    | 0.72 | 17.14  | 26.69  | 38.72  | 57.92   |
| 0.32 | 7892.23    | 13111.11    | 20275.97    | 33529.98    | 0.73 | 14.75  | 22.89  | 33.18  | 50.13   |
| 0.33 | 6544.16    | 10804.03    | 16629.72    | 27360.37    | 0.74 | 12.63  | 19.54  | 28.26  | 42.51   |
| 0.34 | 5438.29    | 8950.10     | 13790.91    | 22617.59    | 0.75 | 10.75  | 16.79  | 23.99  | 35.44   |
| 0.35 | 4515.86    | 7505.88     | 11550.80    | 18873.07    | 0.76 | 9.21   | 14.33  | 20.56  | 30.16   |
| 0.36 | 3766.37    | 6256.71     | 9598.14     | 16055.98    | 0.77 | 7.90   | 12.13  | 17.29  | 25.62   |
| 0.37 | 3157.55    | 5183.45     | 8018.23     | 13263.96    | 0.78 | 6.67   | 10.29  | 14.45  | 21.41   |
| 0.38 | 2661.39    | 4429.81     | 6796.16     | 11086.23    | 0.79 | 5.60   | 8.64   | 12.22  | 17.96   |
| 0.39 | 2268.15    | 3671.40     | 5659.21     | 9239.01     | 0.80 | 4.70   | 7.17   | 10.25  | 15.11   |
| 0.40 | 1891.47    | 3126.13     | 4735.81     | 7693.61     | 0.81 | 3.95   | 6.04   | 8.56   | 12.40   |
| 0.41 | 1601.92    | 2648.34     | 4005.11     | 6526.88     | 0.82 | 3.29   | 5.05   | 7.06   | 10.30   |
| 0.42 | 1364.41    | 2242.00     | 3416.69     | 5507.75     | 0.83 | 2.74   | 4.16   | 5.83   | 8.51    |
| 0.43 | 1163.74    | 1909.16     | 2927.48     | 4712.45     | 0.84 | 2.26   | 3.41   | 4.84   | 6.94    |
| 0.44 | 1001.59    | 1647.80     | 2510.49     | 3967.47     | 0.85 | 1.84   | 2.75   | 3.89   | 5.65    |
| 0.45 | 851.83     | 1405.53     | 2110.55     | 3392.20     | 0.86 | 1.51   | 2.24   | 3.14   | 4.53    |
| 0.46 | 735.80     | 1197.71     | 1806.73     | 2913.00     | 0.87 | 1.25   | 1.83   | 2.51   | 3.60    |
| 0.47 | 627.29     | 1030.92     | 1551.55     | 2464.12     | 0.88 | 1.06   | 1.47   | 2.02   | 2.83    |
| 0.48 | 539.93     | 880.21      | 1327.11     | 2104.90     | 0.89 | 0.92   | 1.18   | 1.59   | 2.25    |
| 0.49 | 468.81     | 751.58      | 1134.26     | 1801.41     | 0.90 | 0.80   | 0.98   | 1.27   | 1.75    |
| 0.50 | 399.46     | 649.16      | 983.88      | 1553.69     |      |        |        |        |         |

Table S314: Critical values for detector  $\hat{H}_{mov,sn}^{m,0.2}$  with windows size  $n = 0.2$ , and FM-OLS and D-OLS estimation in a model with intercept and linear trend. The number of integrated regressors is 1 and the highest power of  $x_{kt}$  is 1.

| m    | 90 %        | 95 %        | 97,5 %      | 99 %        | m    | 90 %   | 95 %    | 97,5 %  | 99 %    |
|------|-------------|-------------|-------------|-------------|------|--------|---------|---------|---------|
| 0.10 | 15231376.96 | 26544780.70 | 42449909.30 | 72790536.98 | 0.51 | 864.04 | 1406.20 | 2188.66 | 3574.43 |
| 0.11 | 9056977.55  | 15783706.40 | 25102506.92 | 43648507.12 | 0.52 | 747.47 | 1222.29 | 1864.34 | 3092.48 |
| 0.12 | 5567129.75  | 9705903.82  | 15761651.08 | 26284759.25 | 0.53 | 644.15 | 1057.06 | 1604.83 | 2665.04 |
| 0.13 | 3591078.59  | 6204590.20  | 9964308.33  | 17195499.37 | 0.54 | 558.58 | 916.15  | 1382.83 | 2301.12 |
| 0.14 | 2392074.10  | 4138446.62  | 6536072.61  | 11050865.47 | 0.55 | 483.36 | 795.48  | 1197.50 | 1980.79 |
| 0.15 | 1635915.35  | 2775361.52  | 4408825.68  | 7501300.73  | 0.56 | 421.21 | 691.02  | 1043.20 | 1699.16 |
| 0.16 | 1129492.08  | 1966347.33  | 3087465.17  | 5215583.50  | 0.57 | 367.35 | 597.83  | 906.37  | 1456.18 |
| 0.17 | 803642.35   | 1385681.83  | 2210195.66  | 3776750.18  | 0.58 | 320.54 | 518.18  | 784.38  | 1257.97 |
| 0.18 | 579955.15   | 1004026.39  | 1606111.99  | 2729534.83  | 0.59 | 280.22 | 447.83  | 678.93  | 1097.50 |
| 0.19 | 424806.16   | 733934.07   | 1179863.18  | 1991622.49  | 0.60 | 243.54 | 389.44  | 587.87  | 954.36  |
| 0.20 | 316702.57   | 550371.05   | 883728.01   | 1504323.49  | 0.61 | 211.38 | 338.06  | 506.54  | 826.11  |
| 0.21 | 241580.78   | 413882.50   | 667617.68   | 1139411.02  | 0.62 | 184.01 | 293.84  | 435.70  | 706.86  |
| 0.22 | 183662.78   | 317790.00   | 504242.83   | 865714.23   | 0.63 | 160.13 | 254.18  | 378.53  | 611.58  |
| 0.23 | 142646.92   | 242099.85   | 383928.53   | 649223.70   | 0.64 | 139.00 | 219.62  | 326.46  | 521.25  |
| 0.24 | 111109.35   | 189094.66   | 299361.25   | 508482.18   | 0.65 | 120.64 | 190.09  | 281.81  | 447.42  |
| 0.25 | 87227.28    | 148814.67   | 233813.42   | 401712.59   | 0.66 | 105.13 | 164.72  | 242.00  | 384.32  |
| 0.26 | 69203.95    | 118298.57   | 183888.24   | 312414.52   | 0.67 | 91.38  | 142.29  | 207.86  | 329.62  |
| 0.27 | 55016.20    | 94327.75    | 148492.47   | 246677.65   | 0.68 | 79.35  | 123.01  | 179.06  | 282.03  |
| 0.28 | 44304.45    | 75365.30    | 119941.70   | 198234.24   | 0.69 | 69.22  | 106.84  | 155.08  | 239.32  |
| 0.29 | 35598.59    | 61067.27    | 97169.66    | 162238.37   | 0.70 | 59.92  | 92.05   | 133.92  | 203.58  |
| 0.30 | 29008.07    | 49640.87    | 78602.95    | 134675.70   | 0.71 | 52.19  | 79.64   | 114.38  | 172.92  |
| 0.31 | 23819.22    | 40436.88    | 63776.69    | 109846.65   | 0.72 | 45.04  | 68.79   | 98.07   | 148.98  |
| 0.32 | 19659.23    | 33316.27    | 52089.30    | 90135.27    | 0.73 | 38.91  | 59.55   | 84.77   | 126.87  |
| 0.33 | 16184.10    | 27381.93    | 42971.90    | 72267.12    | 0.74 | 33.75  | 51.26   | 72.67   | 108.92  |
| 0.34 | 13403.62    | 22496.84    | 35292.71    | 59721.29    | 0.75 | 29.11  | 44.23   | 62.47   | 92.36   |
| 0.35 | 11097.70    | 18820.11    | 29111.06    | 49473.36    | 0.76 | 24.98  | 37.90   | 53.57   | 77.86   |
| 0.36 | 9252.62     | 15609.21    | 24495.74    | 41753.84    | 0.77 | 21.50  | 32.54   | 45.59   | 66.24   |
| 0.37 | 7803.85     | 13106.99    | 20616.95    | 34513.20    | 0.78 | 18.44  | 27.62   | 38.64   | 56.26   |
| 0.38 | 6593.12     | 11023.82    | 17268.36    | 29063.07    | 0.79 | 15.73  | 23.61   | 32.73   | 47.31   |
| 0.39 | 5596.21     | 9292.57     | 14601.53    | 24432.93    | 0.80 | 13.40  | 19.93   | 27.69   | 39.75   |
| 0.40 | 4731.19     | 7888.13     | 12199.56    | 20454.71    | 0.81 | 11.39  | 16.90   | 23.34   | 33.37   |
| 0.41 | 3997.26     | 6702.79     | 10250.64    | 17048.21    | 0.82 | 9.66   | 14.19   | 19.55   | 27.84   |
| 0.42 | 3393.11     | 5680.93     | 8713.90     | 14510.55    | 0.83 | 8.13   | 11.93   | 16.32   | 23.38   |
| 0.43 | 2900.84     | 4821.21     | 7401.71     | 12275.67    | 0.84 | 6.85   | 10.00   | 13.57   | 19.15   |
| 0.44 | 2484.14     | 4152.83     | 6398.30     | 10443.28    | 0.85 | 5.74   | 8.34    | 11.18   | 15.78   |
| 0.45 | 2133.69     | 3542.02     | 5460.78     | 8949.52     | 0.86 | 4.78   | 6.93    | 9.29    | 12.97   |
| 0.46 | 1825.77     | 3005.14     | 4696.31     | 7725.07     | 0.87 | 3.95   | 5.70    | 7.65    | 10.49   |
| 0.47 | 1566.02     | 2595.39     | 3988.81     | 6608.21     | 0.88 | 3.25   | 4.65    | 6.27    | 8.48    |
| 0.48 | 1337.53     | 2239.58     | 3451.81     | 5681.76     | 0.89 | 2.67   | 3.79    | 5.06    | 6.80    |
| 0.49 | 1155.75     | 1921.36     | 2958.45     | 4795.22     | 0.90 | 2.18   | 3.08    | 4.06    | 5.41    |
| 0.50 | 994.93      | 1646.10     | 2541.58     | 4156.02     |      |        |         |         |         |

Table S315: Critical values for detector  $\hat{H}_{mov,sn}^{m,0.2}$  with windows size  $n = 0.2$ , and IM-OLS estimation in a model with intercept and linear trend. The number of integrated regressors is 1 and the highest power of  $x_{kt}$  is 1.

| m    | 90 %       | 95 %        | 97,5 %      | 99 %        | m    | 90 %   | 95 %   | 97,5 % | 99 %    |
|------|------------|-------------|-------------|-------------|------|--------|--------|--------|---------|
| 0.10 | 6805211.65 | 11462219.94 | 17823207.16 | 30109631.42 | 0.51 | 386.92 | 622.03 | 943.20 | 1506.58 |
| 0.11 | 4056687.95 | 6775240.72  | 10627252.21 | 18069914.66 | 0.52 | 335.21 | 537.74 | 806.03 | 1256.53 |
| 0.12 | 2507972.22 | 4249752.15  | 6547720.73  | 10940524.75 | 0.53 | 284.97 | 461.41 | 691.11 | 1086.46 |
| 0.13 | 1627752.83 | 2742772.55  | 4312756.93  | 7265848.70  | 0.54 | 248.87 | 401.26 | 595.86 | 949.64  |
| 0.14 | 1085441.01 | 1821002.65  | 2860814.77  | 4779410.71  | 0.55 | 214.74 | 347.38 | 516.38 | 811.69  |
| 0.15 | 743855.05  | 1255736.35  | 1956081.26  | 3234802.78  | 0.56 | 187.35 | 302.51 | 449.87 | 693.38  |
| 0.16 | 519099.34  | 877133.02   | 1364628.23  | 2266703.82  | 0.57 | 160.32 | 260.71 | 389.56 | 602.62  |
| 0.17 | 370751.85  | 625306.08   | 976981.62   | 1609145.36  | 0.58 | 139.61 | 226.90 | 335.40 | 519.81  |
| 0.18 | 266244.93  | 453769.54   | 707482.39   | 1197995.80  | 0.59 | 121.38 | 195.41 | 289.37 | 451.59  |
| 0.19 | 197510.69  | 329979.53   | 517442.44   | 871613.19   | 0.60 | 104.67 | 167.57 | 247.76 | 388.66  |
| 0.20 | 148046.95  | 250569.05   | 389732.56   | 656888.75   | 0.61 | 90.39  | 144.56 | 211.92 | 337.29  |
| 0.21 | 112205.27  | 188585.71   | 290143.36   | 486273.51   | 0.62 | 78.15  | 124.10 | 183.31 | 283.29  |
| 0.22 | 85478.05   | 144596.49   | 225653.20   | 374218.33   | 0.63 | 66.84  | 107.16 | 156.28 | 243.84  |
| 0.23 | 66985.18   | 112286.89   | 174950.33   | 291677.73   | 0.64 | 57.77  | 92.05  | 134.80 | 208.13  |
| 0.24 | 51787.88   | 87384.51    | 137412.50   | 223592.81   | 0.65 | 50.24  | 79.06  | 116.10 | 179.58  |
| 0.25 | 40971.75   | 69101.89    | 107276.52   | 178958.36   | 0.66 | 43.25  | 67.90  | 99.47  | 151.45  |
| 0.26 | 32561.53   | 54459.37    | 85191.10    | 138789.83   | 0.67 | 37.19  | 59.14  | 85.37  | 130.81  |
| 0.27 | 26015.45   | 43147.12    | 67516.96    | 112521.61   | 0.68 | 32.24  | 50.81  | 74.24  | 111.55  |
| 0.28 | 20931.84   | 34799.05    | 54554.20    | 89822.25    | 0.69 | 27.89  | 43.73  | 63.40  | 95.14   |
| 0.29 | 16921.84   | 28189.78    | 43576.23    | 70880.50    | 0.70 | 23.86  | 37.07  | 53.19  | 80.80   |
| 0.30 | 13727.09   | 22765.68    | 34807.11    | 57682.66    | 0.71 | 20.41  | 31.91  | 45.93  | 68.09   |
| 0.31 | 11198.73   | 18668.64    | 29078.01    | 47816.61    | 0.72 | 17.54  | 27.28  | 39.51  | 59.13   |
| 0.32 | 9166.20    | 15261.76    | 23596.36    | 39187.00    | 0.73 | 15.04  | 23.32  | 33.81  | 50.96   |
| 0.33 | 7571.91    | 12572.65    | 19339.34    | 31877.91    | 0.74 | 12.83  | 19.82  | 28.59  | 43.02   |
| 0.34 | 6298.83    | 10379.62    | 16107.57    | 26442.29    | 0.75 | 10.92  | 17.00  | 24.22  | 35.72   |
| 0.35 | 5223.54    | 8700.13     | 13469.58    | 21883.87    | 0.76 | 9.34   | 14.47  | 20.72  | 30.37   |
| 0.36 | 4354.21    | 7255.21     | 11168.11    | 18663.95    | 0.77 | 7.99   | 12.24  | 17.44  | 25.79   |
| 0.37 | 3636.02    | 5982.56     | 9257.22     | 15339.69    | 0.78 | 6.77   | 10.39  | 14.54  | 21.47   |
| 0.38 | 3062.52    | 5095.46     | 7855.33     | 12817.28    | 0.79 | 5.70   | 8.74   | 12.33  | 18.07   |
| 0.39 | 2598.72    | 4235.21     | 6528.86     | 10671.28    | 0.80 | 4.80   | 7.27   | 10.36  | 15.20   |
| 0.40 | 2173.23    | 3598.11     | 5458.76     | 8885.09     | 0.81 | 4.07   | 6.15   | 8.65   | 12.52   |
| 0.41 | 1833.37    | 3035.38     | 4595.61     | 7477.83     | 0.82 | 3.42   | 5.16   | 7.19   | 10.42   |
| 0.42 | 1562.24    | 2576.33     | 3918.14     | 6276.21     | 0.83 | 2.87   | 4.29   | 5.95   | 8.60    |
| 0.43 | 1330.35    | 2185.65     | 3340.28     | 5385.22     | 0.84 | 2.39   | 3.53   | 4.97   | 7.06    |
| 0.44 | 1142.20    | 1880.26     | 2869.67     | 4499.50     | 0.85 | 1.97   | 2.89   | 4.02   | 5.78    |
| 0.45 | 968.19     | 1599.42     | 2403.16     | 3846.79     | 0.86 | 1.64   | 2.37   | 3.27   | 4.66    |
| 0.46 | 833.52     | 1361.79     | 2054.26     | 3282.22     | 0.87 | 1.40   | 1.96   | 2.64   | 3.73    |
| 0.47 | 711.63     | 1169.65     | 1757.50     | 2780.70     | 0.88 | 1.22   | 1.60   | 2.14   | 2.97    |
| 0.48 | 608.23     | 994.63      | 1495.36     | 2378.14     | 0.89 | 1.09   | 1.32   | 1.72   | 2.37    |
| 0.49 | 527.70     | 849.43      | 1275.15     | 2029.07     | 0.90 | 0.98   | 1.14   | 1.40   | 1.89    |
| 0.50 | 448.75     | 728.95      | 1099.40     | 1746.71     |      |        |        |        |         |

Table S316: Critical values for detector  $\hat{H}_{mov,sn}^{m,0.3}$  with windows size  $n = 0.3$ , and FM-OLS and D-OLS estimation in a model with intercept and linear trend. The number of integrated regressors is 1 and the highest power of  $x_{kt}$  is 1.

| m    | 90 %        | 95 %        | 97,5 %      | 99 %        | m    | 90 %   | 95 %    | 97,5 %  | 99 %    |
|------|-------------|-------------|-------------|-------------|------|--------|---------|---------|---------|
| 0.10 | 17223541.97 | 30133358.50 | 48050829.33 | 83201702.43 | 0.51 | 970.41 | 1584.67 | 2449.65 | 4012.48 |
| 0.11 | 10259832.18 | 18011253.88 | 28641730.77 | 50536904.88 | 0.52 | 835.94 | 1367.98 | 2085.44 | 3441.58 |
| 0.12 | 6344446.20  | 11101409.09 | 18116801.82 | 30254994.36 | 0.53 | 719.25 | 1177.55 | 1789.53 | 2961.86 |
| 0.13 | 4091688.79  | 7137530.25  | 11480769.08 | 19964327.05 | 0.54 | 622.93 | 1019.32 | 1534.21 | 2536.61 |
| 0.14 | 2750808.96  | 4755794.35  | 7576092.09  | 12809229.21 | 0.55 | 538.11 | 881.41  | 1322.86 | 2178.06 |
| 0.15 | 1885589.22  | 3212759.75  | 5117604.96  | 8785600.75  | 0.56 | 466.37 | 762.00  | 1148.98 | 1854.75 |
| 0.16 | 1303376.07  | 2280012.51  | 3581319.84  | 6112465.82  | 0.57 | 406.67 | 658.75  | 996.42  | 1588.16 |
| 0.17 | 928937.70   | 1608668.27  | 2575883.86  | 4416501.03  | 0.58 | 353.27 | 568.38  | 854.80  | 1373.53 |
| 0.18 | 671370.63   | 1168501.42  | 1869801.28  | 3199925.44  | 0.59 | 307.08 | 490.23  | 742.00  | 1194.89 |
| 0.19 | 493176.57   | 855860.48   | 1373916.75  | 2347441.70  | 0.60 | 265.93 | 424.95  | 636.78  | 1029.29 |
| 0.20 | 367665.44   | 642465.38   | 1037350.87  | 1766395.30  | 0.61 | 230.92 | 366.93  | 548.28  | 889.36  |
| 0.21 | 280850.66   | 483472.32   | 779656.65   | 1340933.87  | 0.62 | 199.85 | 317.90  | 471.87  | 755.31  |
| 0.22 | 213910.31   | 370608.70   | 591876.35   | 1013632.08  | 0.63 | 173.40 | 274.32  | 405.51  | 649.35  |
| 0.23 | 166022.28   | 283217.54   | 452268.73   | 764313.53   | 0.64 | 149.93 | 236.06  | 348.62  | 556.31  |
| 0.24 | 129352.94   | 221037.31   | 351227.00   | 595901.61   | 0.65 | 129.56 | 203.40  | 300.32  | 472.83  |
| 0.25 | 101707.56   | 174235.85   | 274293.48   | 471806.55   | 0.66 | 112.34 | 175.42  | 255.91  | 405.57  |
| 0.26 | 80620.45    | 137998.44   | 215290.47   | 368348.50   | 0.67 | 97.07  | 150.87  | 219.53  | 347.09  |
| 0.27 | 64131.24    | 109910.46   | 173537.84   | 290169.12   | 0.68 | 83.95  | 129.70  | 188.66  | 295.20  |
| 0.28 | 51551.09    | 88113.38    | 139821.74   | 233735.47   | 0.69 | 72.77  | 112.29  | 162.48  | 247.65  |
| 0.29 | 41423.00    | 71065.32    | 113915.44   | 188389.23   | 0.70 | 62.77  | 96.16   | 139.20  | 210.49  |
| 0.30 | 33737.56    | 57816.10    | 91625.85    | 157680.31   | 0.71 | 54.40  | 82.85   | 118.59  | 178.89  |
| 0.31 | 27706.34    | 47104.79    | 74492.35    | 128012.02   | 0.72 | 46.65  | 71.03   | 101.17  | 153.38  |
| 0.32 | 22872.74    | 38734.82    | 60635.32    | 105301.15   | 0.73 | 40.10  | 61.24   | 86.80   | 129.64  |
| 0.33 | 18822.97    | 31807.80    | 50064.14    | 84211.49    | 0.74 | 34.60  | 52.35   | 74.19   | 110.93  |
| 0.34 | 15530.63    | 26020.67    | 41014.25    | 69193.47    | 0.75 | 29.76  | 45.05   | 63.63   | 93.34   |
| 0.35 | 12853.77    | 21819.18    | 33908.04    | 57401.85    | 0.76 | 25.44  | 38.50   | 54.16   | 78.85   |
| 0.36 | 10722.22    | 18113.52    | 28345.73    | 48300.06    | 0.77 | 21.83  | 32.95   | 46.05   | 66.83   |
| 0.37 | 9017.96     | 15155.14    | 23905.60    | 39744.30    | 0.78 | 18.67  | 27.89   | 38.98   | 56.61   |
| 0.38 | 7604.12     | 12711.64    | 19949.79    | 33554.65    | 0.79 | 15.91  | 23.79   | 32.95   | 47.50   |
| 0.39 | 6437.43     | 10714.05    | 16877.43    | 28236.61    | 0.80 | 13.53  | 20.08   | 27.86   | 39.83   |
| 0.40 | 5420.20     | 9113.91     | 13994.23    | 23474.32    | 0.81 | 11.50  | 17.01   | 23.43   | 33.47   |
| 0.41 | 4584.37     | 7712.38     | 11768.24    | 19509.41    | 0.82 | 9.76   | 14.29   | 19.64   | 27.93   |
| 0.42 | 3892.38     | 6528.89     | 9961.06     | 16558.72    | 0.83 | 8.23   | 12.03   | 16.41   | 23.49   |
| 0.43 | 3322.70     | 5509.58     | 8463.35     | 14110.88    | 0.84 | 6.95   | 10.10   | 13.68   | 19.28   |
| 0.44 | 2842.89     | 4747.38     | 7300.96     | 11881.46    | 0.85 | 5.85   | 8.44    | 11.30   | 15.89   |
| 0.45 | 2431.04     | 4027.83     | 6211.33     | 10153.03    | 0.86 | 4.88   | 7.03    | 9.41    | 13.07   |
| 0.46 | 2077.64     | 3421.08     | 5313.24     | 8756.16     | 0.87 | 4.07   | 5.81    | 7.77    | 10.63   |
| 0.47 | 1772.40     | 2939.78     | 4515.30     | 7438.30     | 0.88 | 3.36   | 4.77    | 6.39    | 8.60    |
| 0.48 | 1512.42     | 2535.02     | 3885.54     | 6411.32     | 0.89 | 2.78   | 3.91    | 5.18    | 6.92    |
| 0.49 | 1304.63     | 2168.67     | 3322.86     | 5406.47     | 0.90 | 2.29   | 3.19    | 4.18    | 5.55    |
| 0.50 | 1121.63     | 1857.15     | 2854.52     | 4654.76     |      |        |         |         |         |

Table S317: Critical values for detector  $\hat{H}_{mov,sn}^{m,0.3}$  with windows size  $n = 0.3$ , and IM-OLS estimation in a model with intercept and linear trend. The number of integrated regressors is 1 and the highest power of  $x_{kt}$  is 1.

| m    | 90 %       | 95 %        | 97,5 %      | 99 %         | m    | 90 %   | 95 %   | 97,5 %  | 99 %    |
|------|------------|-------------|-------------|--------------|------|--------|--------|---------|---------|
| 0.10 | 7841801.13 | 20262193.92 | 44964625.05 | 109730515.90 | 0.51 | 264.72 | 662.08 | 1439.64 | 3458.03 |
| 0.11 | 4526527.87 | 11958767.99 | 26997261.71 | 64249806.85  | 0.52 | 222.43 | 566.61 | 1193.63 | 2858.63 |
| 0.12 | 2840254.81 | 7413513.22  | 17001300.42 | 40652658.53  | 0.53 | 190.11 | 477.29 | 993.57  | 2414.04 |
| 0.13 | 1818503.12 | 4704051.82  | 10456444.11 | 25313355.59  | 0.54 | 164.69 | 408.97 | 850.26  | 2088.39 |
| 0.14 | 1192026.20 | 3090243.07  | 7039506.99  | 16863183.36  | 0.55 | 139.88 | 347.37 | 734.56  | 1785.45 |
| 0.15 | 804545.77  | 2121538.74  | 4691167.81  | 11739405.33  | 0.56 | 119.93 | 298.60 | 632.95  | 1508.79 |
| 0.16 | 557709.44  | 1481646.29  | 3248699.16  | 7848442.87   | 0.57 | 103.17 | 255.55 | 543.80  | 1279.23 |
| 0.17 | 389238.58  | 1018271.22  | 2281630.85  | 5618560.73   | 0.58 | 88.34  | 215.19 | 462.58  | 1082.05 |
| 0.18 | 283402.43  | 743504.00   | 1665077.84  | 3934260.29   | 0.59 | 75.22  | 186.20 | 394.34  | 917.03  |
| 0.19 | 206561.55  | 539643.26   | 1203252.01  | 2847427.01   | 0.60 | 64.83  | 156.51 | 336.40  | 772.66  |
| 0.20 | 152016.24  | 400271.74   | 889467.42   | 2130227.35   | 0.61 | 55.86  | 134.54 | 284.20  | 653.44  |
| 0.21 | 113172.05  | 295500.26   | 668353.38   | 1607491.02   | 0.62 | 47.52  | 113.44 | 235.38  | 539.59  |
| 0.22 | 85819.22   | 226857.69   | 500240.66   | 1240955.97   | 0.63 | 41.21  | 95.80  | 205.46  | 455.32  |
| 0.23 | 66392.56   | 173930.15   | 382968.43   | 944779.48    | 0.64 | 34.79  | 80.77  | 167.68  | 373.67  |
| 0.24 | 50361.97   | 133903.74   | 302091.93   | 715323.04    | 0.65 | 29.82  | 69.54  | 140.97  | 319.36  |
| 0.25 | 38877.21   | 102949.83   | 234589.24   | 565419.21    | 0.66 | 25.48  | 58.25  | 120.83  | 275.15  |
| 0.26 | 30297.10   | 79889.54    | 179856.61   | 430197.61    | 0.67 | 21.86  | 49.06  | 97.40   | 222.21  |
| 0.27 | 24058.93   | 63146.23    | 141301.61   | 338060.17    | 0.68 | 18.87  | 41.63  | 82.15   | 177.66  |
| 0.28 | 19262.70   | 50295.56    | 111673.72   | 265496.80    | 0.69 | 15.99  | 35.09  | 69.71   | 148.90  |
| 0.29 | 15332.42   | 39889.44    | 89570.83    | 206394.08    | 0.70 | 13.78  | 29.77  | 58.75   | 122.99  |
| 0.30 | 12483.02   | 32223.01    | 70627.86    | 170499.40    | 0.71 | 11.85  | 25.17  | 49.08   | 103.41  |
| 0.31 | 9871.73    | 25999.42    | 57667.30    | 136250.32    | 0.72 | 10.26  | 21.73  | 40.91   | 87.24   |
| 0.32 | 7961.70    | 20539.38    | 46344.18    | 111959.61    | 0.73 | 8.85   | 18.23  | 34.81   | 72.59   |
| 0.33 | 6571.95    | 17047.69    | 37117.83    | 92990.16     | 0.74 | 7.58   | 15.50  | 29.16   | 60.98   |
| 0.34 | 5291.61    | 13902.52    | 30658.40    | 75491.81     | 0.75 | 6.53   | 12.79  | 24.09   | 50.84   |
| 0.35 | 4272.66    | 11304.20    | 24910.89    | 60930.27     | 0.76 | 5.59   | 10.91  | 20.07   | 42.92   |
| 0.36 | 3554.08    | 9245.00     | 20025.19    | 50091.09     | 0.77 | 4.78   | 9.21   | 16.65   | 35.18   |
| 0.37 | 2913.89    | 7638.38     | 16586.63    | 41733.33     | 0.78 | 4.05   | 7.71   | 13.74   | 27.94   |
| 0.38 | 2469.40    | 6381.16     | 14081.79    | 34957.60     | 0.79 | 3.44   | 6.51   | 11.43   | 22.36   |
| 0.39 | 2046.26    | 5342.00     | 11592.51    | 27673.04     | 0.80 | 2.94   | 5.40   | 9.47    | 18.51   |
| 0.40 | 1685.31    | 4397.48     | 9880.38     | 23362.92     | 0.81 | 2.49   | 4.57   | 7.76    | 14.27   |
| 0.41 | 1428.92    | 3703.39     | 8108.15     | 19266.52     | 0.82 | 2.11   | 3.79   | 6.34    | 11.73   |
| 0.42 | 1188.71    | 3092.09     | 6776.01     | 16376.79     | 0.83 | 1.77   | 3.10   | 5.09    | 9.28    |
| 0.43 | 999.72     | 2595.66     | 5687.23     | 13840.15     | 0.84 | 1.46   | 2.54   | 4.15    | 7.49    |
| 0.44 | 840.97     | 2155.25     | 4898.80     | 11487.89     | 0.85 | 1.20   | 2.05   | 3.32    | 5.88    |
| 0.45 | 708.45     | 1816.17     | 4008.85     | 9621.26      | 0.86 | 0.98   | 1.68   | 2.63    | 4.45    |
| 0.46 | 601.55     | 1523.90     | 3414.54     | 8066.07      | 0.87 | 0.81   | 1.34   | 2.10    | 3.53    |
| 0.47 | 510.32     | 1303.04     | 2850.01     | 6839.87      | 0.88 | 0.65   | 1.07   | 1.63    | 2.67    |
| 0.48 | 431.94     | 1104.67     | 2406.50     | 5761.39      | 0.89 | 0.52   | 0.83   | 1.26    | 2.05    |
| 0.49 | 366.74     | 940.18      | 2067.80     | 4895.03      | 0.90 | 0.41   | 0.64   | 0.95    | 1.56    |
| 0.50 | 307.87     | 796.78      | 1697.42     | 4091.39      |      |        |        |         |         |

Table S318: Critical values for detector  $\hat{H}_{mov,sn}^{m,0.1}$  with windows size  $n = 0.1$ , and FM-OLS and D-OLS estimation in a model with intercept. The number of integrated regressors is 1 and the highest power of  $x_{kt}$  is 2.

| m    | 90 %        | 95 %         | 97,5 %       | 99 %         | m    | 90 %    | 95 %    | 97,5 %   | 99 %     |
|------|-------------|--------------|--------------|--------------|------|---------|---------|----------|----------|
| 0.10 | 54064898.47 | 152421772.10 | 362762930.18 | 929478037.77 | 0.51 | 1688.89 | 4619.42 | 10455.23 | 26129.78 |
| 0.11 | 31904121.26 | 87840370.58  | 215170412.70 | 577632313.94 | 0.52 | 1428.19 | 3865.29 | 8927.83  | 22432.39 |
| 0.12 | 19764821.35 | 55082638.42  | 132747527.40 | 343199236.84 | 0.53 | 1212.10 | 3232.00 | 7429.12  | 19143.81 |
| 0.13 | 12620008.97 | 35024639.23  | 84765427.76  | 226704622.53 | 0.54 | 1026.81 | 2770.72 | 6235.40  | 16404.90 |
| 0.14 | 8312811.64  | 23408428.79  | 54958723.57  | 140455248.76 | 0.55 | 872.62  | 2353.06 | 5316.61  | 13758.88 |
| 0.15 | 5633924.85  | 15796174.22  | 36500248.04  | 93719344.67  | 0.56 | 736.22  | 1965.04 | 4481.79  | 11571.30 |
| 0.16 | 3956249.29  | 10964485.39  | 24819828.65  | 65258178.16  | 0.57 | 628.17  | 1680.67 | 3837.43  | 9850.00  |
| 0.17 | 2773496.18  | 7678293.89   | 17924393.65  | 46077227.36  | 0.58 | 532.94  | 1410.65 | 3279.95  | 8406.96  |
| 0.18 | 1974970.70  | 5580092.20   | 12776815.40  | 33219621.28  | 0.59 | 458.58  | 1207.92 | 2784.61  | 7068.13  |
| 0.19 | 1446014.30  | 3998244.31   | 9378086.99   | 24219858.65  | 0.60 | 393.64  | 1028.40 | 2364.45  | 5972.09  |
| 0.20 | 1059719.29  | 2926100.82   | 7023966.54   | 18377756.48  | 0.61 | 338.43  | 879.12  | 1975.78  | 5000.20  |
| 0.21 | 795541.56   | 2206148.93   | 5257933.63   | 14156303.62  | 0.62 | 289.72  | 736.32  | 1690.52  | 4214.86  |
| 0.22 | 603141.38   | 1662694.13   | 3969921.22   | 10701980.18  | 0.63 | 247.48  | 629.01  | 1437.45  | 3555.68  |
| 0.23 | 465053.20   | 1279525.52   | 3033916.51   | 8087798.14   | 0.64 | 211.11  | 531.28  | 1177.43  | 2955.41  |
| 0.24 | 358536.90   | 983127.35    | 2353504.26   | 6173943.36   | 0.65 | 179.30  | 451.40  | 984.38   | 2474.58  |
| 0.25 | 277830.03   | 760575.97    | 1822283.87   | 4643913.61   | 0.66 | 150.80  | 385.32  | 829.08   | 2035.86  |
| 0.26 | 215895.57   | 601619.21    | 1424185.59   | 3666732.34   | 0.67 | 127.73  | 327.76  | 691.42   | 1717.03  |
| 0.27 | 168618.45   | 470184.48    | 1114759.79   | 2834800.36   | 0.68 | 108.65  | 274.10  | 575.00   | 1412.26  |
| 0.28 | 132179.41   | 370092.95    | 864285.47    | 2251532.48   | 0.69 | 92.23   | 228.31  | 485.87   | 1134.58  |
| 0.29 | 105701.17   | 295010.75    | 682293.63    | 1753846.81   | 0.70 | 77.70   | 188.89  | 403.23   | 945.80   |
| 0.30 | 83860.10    | 235711.69    | 550484.29    | 1383603.18   | 0.71 | 65.09   | 157.54  | 337.71   | 774.01   |
| 0.31 | 67852.85    | 189307.54    | 441599.24    | 1147747.72   | 0.72 | 55.56   | 133.47  | 278.53   | 645.15   |
| 0.32 | 55448.02    | 152678.75    | 362332.63    | 924846.05    | 0.73 | 46.97   | 111.29  | 231.23   | 535.18   |
| 0.33 | 44911.16    | 124313.77    | 295222.35    | 751767.91    | 0.74 | 39.98   | 92.16   | 192.87   | 440.11   |
| 0.34 | 36563.71    | 101282.00    | 239070.62    | 618503.92    | 0.75 | 33.99   | 76.53   | 157.30   | 357.12   |
| 0.35 | 29847.83    | 83360.67     | 194350.01    | 505637.07    | 0.76 | 28.79   | 63.85   | 130.88   | 287.10   |
| 0.36 | 24385.11    | 67795.02     | 159774.47    | 411219.42    | 0.77 | 24.25   | 53.83   | 107.93   | 243.94   |
| 0.37 | 19828.47    | 55271.48     | 134362.83    | 331895.90    | 0.78 | 20.33   | 44.80   | 88.98    | 200.03   |
| 0.38 | 16338.97    | 45837.00     | 110986.46    | 283022.15    | 0.79 | 17.21   | 37.08   | 72.98    | 165.21   |
| 0.39 | 13440.06    | 37506.94     | 89000.83     | 234802.30    | 0.80 | 14.51   | 30.48   | 59.75    | 128.92   |
| 0.40 | 11237.89    | 31142.78     | 72683.05     | 196078.47    | 0.81 | 12.16   | 25.39   | 48.31    | 100.88   |
| 0.41 | 9408.12     | 25795.25     | 60586.44     | 159839.95    | 0.82 | 10.24   | 20.60   | 39.11    | 80.30    |
| 0.42 | 7923.94     | 21587.25     | 51380.88     | 132553.16    | 0.83 | 8.55    | 16.80   | 30.98    | 64.47    |
| 0.43 | 6668.45     | 18124.22     | 42623.80     | 111401.35    | 0.84 | 7.22    | 13.61   | 24.96    | 50.45    |
| 0.44 | 5623.92     | 15167.66     | 35695.43     | 94196.93     | 0.85 | 5.99    | 10.92   | 19.68    | 39.93    |
| 0.45 | 4711.24     | 12956.48     | 29309.78     | 78343.93     | 0.86 | 4.93    | 8.86    | 15.53    | 30.75    |
| 0.46 | 3963.55     | 10796.69     | 24467.61     | 64789.71     | 0.87 | 4.07    | 7.07    | 12.23    | 23.87    |
| 0.47 | 3363.00     | 9076.08      | 20806.20     | 53570.28     | 0.88 | 3.34    | 5.65    | 9.59     | 17.90    |
| 0.48 | 2815.86     | 7653.78      | 17355.01     | 43648.63     | 0.89 | 2.70    | 4.53    | 7.33     | 13.33    |
| 0.49 | 2395.33     | 6371.29      | 14449.92     | 36313.04     | 0.90 | 2.19    | 3.56    | 5.63     | 10.13    |
| 0.50 | 2012.35     | 5406.84      | 12468.90     | 30924.24     |      |         |         |          |          |

Table S319: Critical values for detector  $\hat{H}_{mov,sn}^{m,0.1}$  with windows size  $n = 0.1$ , and IM-OLS estimation in a model with intercept. The number of integrated regressors is 1 and the highest power of  $x_{kt}$  is 2.



| m    | 90 %        | 95 %        | 97,5 %      | 99 %         | m    | 90 %   | 95 %   | 97,5 %  | 99 %    |
|------|-------------|-------------|-------------|--------------|------|--------|--------|---------|---------|
| 0.10 | 11981836.35 | 31303423.88 | 70287785.25 | 172131201.96 | 0.51 | 376.18 | 943.90 | 2036.68 | 4791.91 |
| 0.11 | 6970135.19  | 18507771.62 | 42187033.00 | 101055663.35 | 0.52 | 315.09 | 798.65 | 1696.07 | 3962.95 |
| 0.12 | 4355887.24  | 11475640.07 | 26550573.48 | 63526517.07  | 0.53 | 268.95 | 663.22 | 1395.71 | 3332.19 |
| 0.13 | 2804619.34  | 7276414.12  | 16380901.62 | 39410443.41  | 0.54 | 232.25 | 570.82 | 1180.64 | 2866.39 |
| 0.14 | 1820523.65  | 4778795.96  | 10923567.58 | 26435524.01  | 0.55 | 195.88 | 484.42 | 1013.53 | 2400.27 |
| 0.15 | 1226566.88  | 3273305.88  | 7236474.99  | 18314861.01  | 0.56 | 168.25 | 415.27 | 868.88  | 2041.82 |
| 0.16 | 849622.12   | 2299504.74  | 5052493.44  | 12241947.17  | 0.57 | 144.33 | 353.37 | 744.27  | 1734.07 |
| 0.17 | 598731.99   | 1577128.13  | 3566173.46  | 8677128.25   | 0.58 | 122.23 | 297.01 | 622.97  | 1459.71 |
| 0.18 | 432488.78   | 1147705.57  | 2574717.22  | 6153493.49   | 0.59 | 104.55 | 253.13 | 533.06  | 1242.54 |
| 0.19 | 316629.48   | 831094.07   | 1868114.25  | 4365994.42   | 0.60 | 90.11  | 212.77 | 449.38  | 1027.46 |
| 0.20 | 232518.05   | 613867.85   | 1378653.34  | 3295978.69   | 0.61 | 76.24  | 182.72 | 379.11  | 867.60  |
| 0.21 | 173752.72   | 450794.25   | 1022183.68  | 2494808.36   | 0.62 | 64.52  | 151.07 | 315.95  | 708.43  |
| 0.22 | 130950.55   | 347260.27   | 765610.78   | 1926234.12   | 0.63 | 55.82  | 127.40 | 269.55  | 591.00  |
| 0.23 | 101271.71   | 265574.09   | 589853.68   | 1443526.53   | 0.64 | 47.14  | 107.15 | 218.58  | 483.50  |
| 0.24 | 76617.22    | 205185.04   | 458147.09   | 1091028.22   | 0.65 | 39.95  | 91.60  | 184.00  | 413.72  |
| 0.25 | 59001.35    | 157523.76   | 356608.47   | 864099.42    | 0.66 | 34.04  | 76.43  | 156.97  | 352.34  |
| 0.26 | 45813.61    | 121178.98   | 275259.09   | 660737.40    | 0.67 | 28.90  | 63.47  | 125.77  | 282.59  |
| 0.27 | 36472.16    | 95392.52    | 214971.55   | 516900.68    | 0.68 | 24.81  | 53.88  | 103.68  | 224.88  |
| 0.28 | 29129.27    | 76428.15    | 169574.57   | 404731.24    | 0.69 | 20.90  | 45.00  | 86.63   | 185.45  |
| 0.29 | 23236.68    | 60307.32    | 137102.35   | 315248.09    | 0.70 | 17.94  | 37.86  | 72.67   | 152.07  |
| 0.30 | 18789.78    | 48490.47    | 108044.04   | 256513.97    | 0.71 | 15.25  | 31.82  | 60.61   | 126.25  |
| 0.31 | 14833.30    | 39159.57    | 87158.72    | 205138.48    | 0.72 | 13.04  | 27.21  | 50.51   | 106.00  |
| 0.32 | 11996.87    | 31023.39    | 69420.83    | 170761.91    | 0.73 | 11.18  | 22.68  | 42.00   | 87.06   |
| 0.33 | 9763.43     | 25628.71    | 55484.56    | 138918.21    | 0.74 | 9.50   | 18.89  | 34.94   | 72.08   |
| 0.34 | 7905.04     | 20821.27    | 46273.67    | 114057.49    | 0.75 | 8.09   | 15.47  | 28.58   | 58.98   |
| 0.35 | 6354.26     | 16856.54    | 37459.81    | 91951.77     | 0.76 | 6.83   | 13.04  | 23.69   | 48.91   |
| 0.36 | 5289.11     | 13759.92    | 29794.26    | 74321.77     | 0.77 | 5.76   | 10.92  | 19.21   | 39.95   |
| 0.37 | 4329.41     | 11308.13    | 24757.76    | 62155.39     | 0.78 | 4.82   | 8.99   | 15.87   | 31.43   |
| 0.38 | 3642.90     | 9488.20     | 20911.87    | 52060.57     | 0.79 | 4.04   | 7.48   | 12.92   | 24.98   |
| 0.39 | 3016.79     | 7885.46     | 17007.46    | 40972.53     | 0.80 | 3.38   | 6.16   | 10.56   | 20.19   |
| 0.40 | 2492.42     | 6486.39     | 14461.99    | 34261.56     | 0.81 | 2.83   | 5.10   | 8.51    | 15.46   |
| 0.41 | 2105.91     | 5431.03     | 11895.31    | 28420.05     | 0.82 | 2.36   | 4.18   | 6.90    | 12.52   |
| 0.42 | 1738.01     | 4508.88     | 9936.39     | 23938.31     | 0.83 | 1.94   | 3.37   | 5.48    | 9.87    |
| 0.43 | 1463.29     | 3767.32     | 8351.93     | 20038.91     | 0.84 | 1.59   | 2.73   | 4.40    | 7.84    |
| 0.44 | 1219.83     | 3126.62     | 7113.29     | 16655.84     | 0.85 | 1.30   | 2.18   | 3.48    | 6.11    |
| 0.45 | 1032.03     | 2630.25     | 5756.56     | 13865.79     | 0.86 | 1.09   | 1.77   | 2.73    | 4.58    |
| 0.46 | 867.99      | 2196.41     | 4907.89     | 11304.48     | 0.87 | 0.93   | 1.41   | 2.18    | 3.64    |
| 0.47 | 736.98      | 1875.77     | 4093.92     | 9827.73      | 0.88 | 0.81   | 1.15   | 1.70    | 2.74    |
| 0.48 | 620.98      | 1583.54     | 3467.49     | 8237.02      | 0.89 | 0.71   | 0.94   | 1.33    | 2.11    |
| 0.49 | 526.17      | 1345.84     | 2941.91     | 6940.24      | 0.90 | 0.63   | 0.81   | 1.04    | 1.63    |
| 0.50 | 441.78      | 1124.32     | 2443.59     | 5716.46      |      |        |        |         |         |

Table S320: Critical values for detector  $\hat{H}_{mov,sn}^{m,0.2}$  with windows size  $n = 0.2$ , and FM-OLS and D-OLS estimation in a model with intercept. The number of integrated regressors is 1 and the highest power of  $x_{kt}$  is 2.

| m    | 90 %        | 95 %         | 97,5 %       | 99 %          | m    | 90 %    | 95 %    | 97,5 %   | 99 %     |
|------|-------------|--------------|--------------|---------------|------|---------|---------|----------|----------|
| 0.10 | 82939145.08 | 236553736.96 | 569727454.81 | 1471231432.45 | 0.51 | 2394.74 | 6471.58 | 14808.01 | 36818.97 |
| 0.11 | 48658909.22 | 136551440.44 | 336552804.66 | 905668921.59  | 0.52 | 2015.91 | 5420.29 | 12535.06 | 31153.47 |
| 0.12 | 30230074.68 | 84658697.99  | 206977606.69 | 532654802.90  | 0.53 | 1704.41 | 4569.69 | 10498.22 | 26484.97 |
| 0.13 | 19233408.05 | 54171060.69  | 132148971.56 | 352721315.43  | 0.54 | 1435.95 | 3856.97 | 8690.54  | 22492.11 |
| 0.14 | 12716001.72 | 36066401.46  | 85272654.86  | 220551334.72  | 0.55 | 1216.24 | 3257.63 | 7306.68  | 18852.93 |
| 0.15 | 8650870.12  | 24339942.64  | 56561111.00  | 147077768.61  | 0.56 | 1027.47 | 2729.88 | 6128.09  | 15837.91 |
| 0.16 | 6053282.10  | 16868090.91  | 38655252.26  | 101789673.08  | 0.57 | 868.54  | 2311.69 | 5189.68  | 13302.59 |
| 0.17 | 4244831.06  | 11797859.54  | 27705208.29  | 70979789.41   | 0.58 | 730.80  | 1929.86 | 4416.44  | 11343.49 |
| 0.18 | 3032624.61  | 8601867.89   | 19723115.61  | 51586215.97   | 0.59 | 630.74  | 1639.70 | 3790.43  | 9450.70  |
| 0.19 | 2214129.29  | 6116761.88   | 14451519.09  | 37337356.69   | 0.60 | 537.44  | 1380.66 | 3159.68  | 7862.77  |
| 0.20 | 1614486.40  | 4517906.79   | 10895306.16  | 28725570.22   | 0.61 | 460.82  | 1170.87 | 2631.59  | 6557.71  |
| 0.21 | 1209091.65  | 3387390.88   | 8088592.43   | 21794558.53   | 0.62 | 390.62  | 986.52  | 2242.65  | 5518.31  |
| 0.22 | 918964.09   | 2532488.49   | 6103147.18   | 16562892.20   | 0.63 | 331.37  | 829.36  | 1868.99  | 4633.40  |
| 0.23 | 706056.88   | 1975433.71   | 4645282.53   | 12401151.55   | 0.64 | 280.66  | 701.12  | 1542.98  | 3800.44  |
| 0.24 | 544210.52   | 1502980.64   | 3587349.75   | 9489935.99    | 0.65 | 236.34  | 591.57  | 1273.40  | 3140.36  |
| 0.25 | 420869.41   | 1158252.89   | 2793558.07   | 7143788.47    | 0.66 | 199.76  | 499.27  | 1069.16  | 2600.87  |
| 0.26 | 326891.65   | 915109.23    | 2176396.63   | 5562892.16    | 0.67 | 167.11  | 420.82  | 873.91   | 2142.60  |
| 0.27 | 254421.01   | 712497.93    | 1687947.42   | 4345430.67    | 0.68 | 141.08  | 351.43  | 729.52   | 1770.15  |
| 0.28 | 198921.26   | 558121.22    | 1316800.78   | 3413179.76    | 0.69 | 119.29  | 288.80  | 607.14   | 1422.41  |
| 0.29 | 158968.42   | 442603.66    | 1039550.86   | 2671298.84    | 0.70 | 100.12  | 239.06  | 502.35   | 1167.97  |
| 0.30 | 125570.30   | 355911.16    | 838507.49    | 2096738.22    | 0.71 | 83.34   | 197.95  | 421.01   | 935.39   |
| 0.31 | 102156.94   | 286592.51    | 662869.88    | 1725933.32    | 0.72 | 70.36   | 164.64  | 342.49   | 770.10   |
| 0.32 | 82940.36    | 228611.83    | 544918.95    | 1390035.96    | 0.73 | 58.90   | 136.78  | 281.36   | 630.96   |
| 0.33 | 67349.30    | 185478.23    | 439848.58    | 1138206.45    | 0.74 | 49.70   | 113.04  | 229.53   | 519.12   |
| 0.34 | 54587.10    | 151545.49    | 359039.92    | 916211.54     | 0.75 | 41.97   | 92.65   | 186.87   | 417.21   |
| 0.35 | 44236.10    | 124058.97    | 289132.70    | 749589.45     | 0.76 | 35.08   | 76.20   | 153.83   | 332.68   |
| 0.36 | 36085.08    | 101204.44    | 237937.03    | 609802.77     | 0.77 | 29.25   | 63.57   | 125.40   | 275.71   |
| 0.37 | 29586.40    | 82820.56     | 197993.11    | 494775.96     | 0.78 | 24.58   | 52.35   | 101.71   | 222.62   |
| 0.38 | 24030.81    | 68271.44     | 164540.63    | 414877.36     | 0.79 | 20.49   | 42.67   | 82.61    | 181.83   |
| 0.39 | 19799.89    | 54960.18     | 130970.53    | 343111.35     | 0.80 | 17.07   | 34.89   | 67.38    | 140.85   |
| 0.40 | 16527.68    | 45666.19     | 106495.77    | 286046.68     | 0.81 | 14.10   | 28.46   | 53.43    | 108.71   |
| 0.41 | 13823.49    | 37835.36     | 88907.03     | 234942.32     | 0.82 | 11.73   | 23.05   | 42.77    | 86.14    |
| 0.42 | 11581.63    | 31593.86     | 73941.96     | 190577.13     | 0.83 | 9.67    | 18.52   | 33.61    | 68.75    |
| 0.43 | 9727.10     | 26391.21     | 61856.31     | 162035.41     | 0.84 | 8.04    | 14.86   | 26.75    | 52.84    |
| 0.44 | 8102.98     | 21976.93     | 51684.63     | 137191.31     | 0.85 | 6.63    | 11.80   | 20.83    | 41.76    |
| 0.45 | 6749.82     | 18655.98     | 42440.46     | 112279.67     | 0.86 | 5.38    | 9.47    | 16.28    | 31.81    |
| 0.46 | 5678.29     | 15521.51     | 35417.38     | 92952.90      | 0.87 | 4.38    | 7.48    | 12.68    | 24.63    |
| 0.47 | 4816.83     | 13006.23     | 29860.47     | 77945.53      | 0.88 | 3.57    | 5.91    | 9.87     | 18.33    |
| 0.48 | 4013.51     | 10910.11     | 24634.36     | 62117.71      | 0.89 | 2.87    | 4.71    | 7.54     | 13.54    |
| 0.49 | 3417.09     | 9116.40      | 20638.75     | 51660.38      | 0.90 | 2.33    | 3.72    | 5.78     | 10.27    |
| 0.50 | 2863.61     | 7657.89      | 17584.51     | 42991.07      |      |         |         |          |          |

Table S321: Critical values for detector  $\hat{H}_{mov,sn}^{m,0.2}$  with windows size  $n = 0.2$ , and IM-OLS estimation in a model with intercept. The number of integrated regressors is 1 and the highest power of  $x_{kt}$  is 2.

| m    | 90 %        | 95 %        | 97,5 %      | 99 %         | m    | 90 %   | 95 %    | 97,5 %  | 99 %    |
|------|-------------|-------------|-------------|--------------|------|--------|---------|---------|---------|
| 0.10 | 14110916.26 | 37085967.87 | 84650195.13 | 205362820.70 | 0.51 | 416.64 | 1042.83 | 2234.48 | 5191.42 |
| 0.11 | 8233884.49  | 21870190.31 | 50147929.92 | 121010700.44 | 0.52 | 349.48 | 876.96  | 1850.84 | 4289.10 |
| 0.12 | 5112064.67  | 13567872.86 | 31637729.90 | 75636219.22  | 0.53 | 297.55 | 729.48  | 1507.64 | 3603.40 |
| 0.13 | 3289625.15  | 8604396.08  | 19390335.20 | 46851112.78  | 0.54 | 253.01 | 620.24  | 1282.87 | 3087.76 |
| 0.14 | 2144189.34  | 5634021.03  | 12920629.14 | 31420909.30  | 0.55 | 214.12 | 525.63  | 1093.13 | 2558.63 |
| 0.15 | 1442809.31  | 3877499.14  | 8577578.86  | 21569044.86  | 0.56 | 183.15 | 448.72  | 934.21  | 2177.52 |
| 0.16 | 1000088.74  | 2709078.25  | 5957446.96  | 14318133.85  | 0.57 | 157.00 | 380.16  | 794.62  | 1845.93 |
| 0.17 | 702601.98   | 1861411.89  | 4178318.54  | 10284560.26  | 0.58 | 132.70 | 319.17  | 665.96  | 1530.14 |
| 0.18 | 507945.91   | 1344571.93  | 3056379.25  | 7303684.50   | 0.59 | 113.41 | 270.88  | 561.41  | 1302.73 |
| 0.19 | 371202.40   | 977074.34   | 2223038.28  | 5200840.37   | 0.60 | 97.18  | 226.83  | 475.26  | 1077.75 |
| 0.20 | 273708.66   | 719824.84   | 1632923.11  | 3923142.40   | 0.61 | 81.99  | 193.85  | 400.81  | 903.77  |
| 0.21 | 201537.47   | 529060.88   | 1195925.74  | 2937649.21   | 0.62 | 69.35  | 160.01  | 330.63  | 743.87  |
| 0.22 | 153156.07   | 403055.84   | 903729.40   | 2251217.02   | 0.63 | 59.61  | 134.66  | 282.09  | 616.08  |
| 0.23 | 118078.45   | 309358.42   | 696810.79   | 1686771.71   | 0.64 | 50.02  | 112.59  | 227.66  | 499.81  |
| 0.24 | 88678.32    | 241090.04   | 535336.14   | 1270084.76   | 0.65 | 42.27  | 95.92   | 191.55  | 427.20  |
| 0.25 | 68843.40    | 182924.78   | 416288.83   | 1007562.73   | 0.66 | 35.95  | 79.47   | 162.61  | 361.56  |
| 0.26 | 53454.32    | 140346.69   | 322581.54   | 777751.96    | 0.67 | 30.28  | 66.17   | 129.94  | 289.31  |
| 0.27 | 42334.38    | 111058.96   | 250718.52   | 596756.99    | 0.68 | 25.94  | 55.82   | 106.40  | 229.71  |
| 0.28 | 33828.02    | 88426.03    | 196960.48   | 470377.80    | 0.69 | 21.71  | 46.38   | 88.63   | 188.56  |
| 0.29 | 27035.81    | 69756.55    | 159133.91   | 361567.41    | 0.70 | 18.56  | 38.88   | 74.19   | 154.09  |
| 0.30 | 21729.47    | 55873.38    | 124891.42   | 295729.30    | 0.71 | 15.73  | 32.43   | 61.63   | 128.18  |
| 0.31 | 17139.17    | 45251.95    | 100646.67   | 237590.19    | 0.72 | 13.39  | 27.70   | 51.19   | 106.88  |
| 0.32 | 13812.02    | 35793.05    | 79920.88    | 193784.55    | 0.73 | 11.43  | 23.00   | 42.38   | 87.74   |
| 0.33 | 11236.33    | 29592.32    | 63617.86    | 160175.65    | 0.74 | 9.67   | 19.11   | 35.24   | 72.65   |
| 0.34 | 9059.72     | 23850.82    | 53323.65    | 132805.00    | 0.75 | 8.21   | 15.63   | 28.74   | 59.21   |
| 0.35 | 7297.73     | 19173.85    | 42694.95    | 104619.51    | 0.76 | 6.92   | 13.15   | 23.79   | 49.04   |
| 0.36 | 6025.42     | 15602.70    | 34342.98    | 84755.27     | 0.77 | 5.85   | 10.98   | 19.29   | 40.08   |
| 0.37 | 4962.41     | 12939.76    | 28136.18    | 70403.72     | 0.78 | 4.90   | 9.08    | 15.95   | 31.50   |
| 0.38 | 4154.46     | 10771.50    | 23732.82    | 59027.11     | 0.79 | 4.11   | 7.56    | 12.98   | 25.01   |
| 0.39 | 3430.40     | 8943.91     | 19258.52    | 46474.05     | 0.80 | 3.47   | 6.24    | 10.64   | 20.27   |
| 0.40 | 2837.98     | 7358.28     | 16272.37    | 38632.52     | 0.81 | 2.92   | 5.19    | 8.62    | 15.51   |
| 0.41 | 2378.25     | 6112.92     | 13362.29    | 31981.79     | 0.82 | 2.46   | 4.27    | 6.99    | 12.59   |
| 0.42 | 1963.29     | 5102.77     | 11159.04    | 27115.57     | 0.83 | 2.05   | 3.47    | 5.57    | 9.99    |
| 0.43 | 1646.75     | 4226.09     | 9399.99     | 22299.34     | 0.84 | 1.69   | 2.84    | 4.51    | 7.98    |
| 0.44 | 1376.68     | 3513.62     | 7909.62     | 18609.84     | 0.85 | 1.42   | 2.28    | 3.59    | 6.20    |
| 0.45 | 1161.73     | 2931.17     | 6442.31     | 15172.55     | 0.86 | 1.25   | 1.88    | 2.84    | 4.69    |
| 0.46 | 975.38      | 2456.56     | 5464.69     | 12572.43     | 0.87 | 1.12   | 1.53    | 2.29    | 3.73    |
| 0.47 | 826.28      | 2074.93     | 4560.14     | 10866.06     | 0.88 | 1.02   | 1.28    | 1.82    | 2.86    |
| 0.48 | 692.66      | 1755.83     | 3826.74     | 9000.25      | 0.89 | 0.94   | 1.12    | 1.46    | 2.22    |
| 0.49 | 588.33      | 1486.21     | 3234.60     | 7579.02      | 0.90 | 0.86   | 1.01    | 1.19    | 1.75    |
| 0.50 | 492.87      | 1240.32     | 2676.04     | 6246.41      |      |        |         |         |         |

Table S322: Critical values for detector  $\hat{H}_{mov,sn}^{m,0.3}$  with windows size  $n = 0.3$ , and FM-OLS and D-OLS estimation in a model with intercept. The number of integrated regressors is 1 and the highest power of  $x_{kt}$  is 2.

| m    | 90 %        | 95 %         | 97.5 %       | 99 %          | m    | 90 %    | 95 %    | 97.5 %   | 99 %     |
|------|-------------|--------------|--------------|---------------|------|---------|---------|----------|----------|
| 0.10 | 97741472.85 | 281517653.12 | 674307978.44 | 1755861215.40 | 0.51 | 2651.09 | 7048.56 | 16074.46 | 39880.46 |
| 0.11 | 57281091.61 | 161626233.38 | 401095347.05 | 1075881207.05 | 0.52 | 2215.79 | 5958.12 | 13576.15 | 33185.43 |
| 0.12 | 35570588.22 | 100360637.16 | 246359223.32 | 635641918.57  | 0.53 | 1878.08 | 4977.83 | 11320.39 | 28462.90 |
| 0.13 | 22462387.20 | 63829738.48  | 157620837.38 | 421590759.36  | 0.54 | 1575.28 | 4207.79 | 9387.25  | 23962.31 |
| 0.14 | 14947051.57 | 42385213.22  | 99981358.14  | 263859612.28  | 0.55 | 1324.47 | 3526.44 | 7839.82  | 19962.60 |
| 0.15 | 10164654.93 | 28578186.38  | 66703609.34  | 174205713.56  | 0.56 | 1117.65 | 2953.22 | 6573.57  | 16708.27 |
| 0.16 | 7066346.70  | 19947957.03  | 46085792.17  | 121138085.23  | 0.57 | 944.32  | 2492.38 | 5574.72  | 14102.58 |
| 0.17 | 4954039.35  | 13860265.79  | 32743860.14  | 83316286.54   | 0.58 | 793.66  | 2064.27 | 4704.46  | 11962.34 |
| 0.18 | 3561016.83  | 10072177.59  | 23206781.48  | 60800111.62   | 0.59 | 677.78  | 1752.13 | 4008.63  | 9960.59  |
| 0.19 | 2592474.21  | 7188308.22   | 17021949.96  | 43848133.40   | 0.60 | 577.10  | 1471.51 | 3353.51  | 8192.12  |
| 0.20 | 1882582.52  | 5289131.90   | 12726038.98  | 33547131.54   | 0.61 | 490.93  | 1242.89 | 2769.04  | 6847.11  |
| 0.21 | 1414329.10  | 4001083.38   | 9492787.40   | 25614058.09   | 0.62 | 416.29  | 1044.12 | 2346.33  | 5732.47  |
| 0.22 | 1068311.97  | 2976488.80   | 7188750.47   | 19098352.21   | 0.63 | 352.80  | 871.56  | 1957.22  | 4853.64  |
| 0.23 | 826134.91   | 2293555.32   | 5472781.47   | 14543037.11   | 0.64 | 296.53  | 736.14  | 1611.31  | 3903.42  |
| 0.24 | 631521.27   | 1756487.88   | 4218497.29   | 11097203.76   | 0.65 | 249.54  | 617.02  | 1323.26  | 3237.46  |
| 0.25 | 487954.03   | 1353674.69   | 3240746.09   | 8348020.55    | 0.66 | 209.87  | 518.19  | 1112.38  | 2676.09  |
| 0.26 | 378523.41   | 1069675.11   | 2528477.02   | 6483460.78    | 0.67 | 175.05  | 434.56  | 904.89   | 2189.00  |
| 0.27 | 295118.70   | 829141.92    | 1970234.58   | 5044352.95    | 0.68 | 147.03  | 363.66  | 751.64   | 1795.09  |
| 0.28 | 229768.13   | 646544.75    | 1524951.35   | 3944575.79    | 0.69 | 124.31  | 297.57  | 623.08   | 1454.41  |
| 0.29 | 183002.43   | 509258.58    | 1202952.54   | 3063885.64    | 0.70 | 103.72  | 244.43  | 510.46   | 1183.68  |
| 0.30 | 145582.62   | 410445.16    | 973079.22    | 2431492.51    | 0.71 | 85.83   | 202.37  | 428.57   | 947.54   |
| 0.31 | 117662.60   | 329272.25    | 763051.16    | 2008901.26    | 0.72 | 72.25   | 167.76  | 347.76   | 775.42   |
| 0.32 | 95683.95    | 263643.71    | 627319.69    | 1589939.79    | 0.73 | 60.37   | 138.64  | 284.95   | 634.70   |
| 0.33 | 77244.70    | 213796.96    | 504291.34    | 1310090.77    | 0.74 | 50.54   | 114.36  | 231.62   | 523.08   |
| 0.34 | 62612.00    | 174277.95    | 409956.24    | 1039887.33    | 0.75 | 42.68   | 93.43   | 188.39   | 418.91   |
| 0.35 | 50772.36    | 142089.99    | 329877.47    | 846725.81     | 0.76 | 35.53   | 76.64   | 154.56   | 333.85   |
| 0.36 | 41289.72    | 116065.69    | 271107.92    | 686738.55     | 0.77 | 29.55   | 63.98   | 126.12   | 276.25   |
| 0.37 | 33758.37    | 94039.60     | 223575.52    | 564281.49     | 0.78 | 24.81   | 52.59   | 102.04   | 222.81   |
| 0.38 | 27441.23    | 77485.54     | 185293.25    | 473395.06     | 0.79 | 20.68   | 42.83   | 82.78    | 182.07   |
| 0.39 | 22470.28    | 63043.27     | 147765.68    | 387907.52     | 0.80 | 17.20   | 34.99   | 67.47    | 140.94   |
| 0.40 | 18641.62    | 51387.98     | 120336.36    | 323288.54     | 0.81 | 14.22   | 28.59   | 53.55    | 108.82   |
| 0.41 | 15614.45    | 42646.97     | 100177.00    | 263300.55     | 0.82 | 11.84   | 23.14   | 42.86    | 86.29    |
| 0.42 | 13049.64    | 35428.35     | 82852.96     | 210817.02     | 0.83 | 9.77    | 18.62   | 33.75    | 68.85    |
| 0.43 | 10932.61    | 29531.55     | 69284.79     | 178970.45     | 0.84 | 8.15    | 14.97   | 26.87    | 52.93    |
| 0.44 | 9132.81     | 24551.42     | 57193.91     | 151689.85     | 0.85 | 6.74    | 11.91   | 20.93    | 41.87    |
| 0.45 | 7585.23     | 20742.67     | 47030.43     | 123936.54     | 0.86 | 5.49    | 9.57    | 16.39    | 31.89    |
| 0.46 | 6392.56     | 17313.72     | 39264.06     | 101690.77     | 0.87 | 4.49    | 7.59    | 12.82    | 24.78    |
| 0.47 | 5378.66     | 14492.64     | 32744.44     | 85056.28      | 0.88 | 3.69    | 6.03    | 9.99     | 18.42    |
| 0.48 | 4485.41     | 12116.60     | 27131.24     | 68506.09      | 0.89 | 2.99    | 4.83    | 7.64     | 13.67    |
| 0.49 | 3765.74     | 10131.94     | 22662.27     | 56345.78      | 0.90 | 2.44    | 3.82    | 5.90     | 10.36    |
| 0.50 | 3173.85     | 8412.75      | 19290.60     | 46544.15      |      |         |         |          |          |

Table S323: Critical values for detector  $\hat{H}_{mov,sn}^{m,0.3}$  with windows size  $n = 0.3$ , and IM-OLS estimation in a model with intercept. The number of integrated regressors is 1 and the highest power of  $x_{kt}$  is 2.

| m    | 90 %        | 95 %        | 97,5 %       | 99 %         | m    | 90 %   | 95 %    | 97,5 %  | 99 %    |
|------|-------------|-------------|--------------|--------------|------|--------|---------|---------|---------|
| 0.10 | 35125031.67 | 79773757.56 | 163598152.72 | 366480480.12 | 0.51 | 776.56 | 1609.70 | 3161.83 | 6907.86 |
| 0.11 | 20278026.64 | 45576104.38 | 93426667.05  | 216146904.16 | 0.52 | 661.88 | 1349.17 | 2638.38 | 5843.24 |
| 0.12 | 12066634.92 | 27519774.95 | 55475790.15  | 127534285.96 | 0.53 | 561.64 | 1137.01 | 2196.91 | 4831.83 |
| 0.13 | 7423129.53  | 16528129.19 | 34293990.25  | 79335816.08  | 0.54 | 480.97 | 976.02  | 1876.23 | 4133.79 |
| 0.14 | 4786774.92  | 10720339.41 | 21763368.28  | 50686986.87  | 0.55 | 408.50 | 835.01  | 1598.96 | 3541.80 |
| 0.15 | 3164727.97  | 7137657.26  | 14465254.85  | 33732484.84  | 0.56 | 351.36 | 708.04  | 1359.58 | 2982.97 |
| 0.16 | 2158437.96  | 4773733.84  | 9691925.61   | 22074961.81  | 0.57 | 300.95 | 599.96  | 1147.55 | 2520.91 |
| 0.17 | 1471873.11  | 3281245.59  | 6733393.95   | 15337959.08  | 0.58 | 258.37 | 506.69  | 965.98  | 2141.45 |
| 0.18 | 1034650.14  | 2325416.01  | 4696873.65   | 10497913.61  | 0.59 | 220.44 | 431.62  | 828.62  | 1800.53 |
| 0.19 | 739033.55   | 1637695.20  | 3344276.43   | 7439979.68   | 0.60 | 186.71 | 370.95  | 694.14  | 1532.75 |
| 0.20 | 540161.69   | 1179904.66  | 2446739.92   | 5363078.48   | 0.61 | 160.70 | 317.02  | 594.00  | 1275.29 |
| 0.21 | 391874.40   | 871979.50   | 1771616.95   | 4023020.78   | 0.62 | 136.55 | 265.76  | 485.24  | 1073.44 |
| 0.22 | 292566.01   | 650425.84   | 1316381.83   | 3006438.64   | 0.63 | 115.33 | 224.62  | 414.31  | 902.91  |
| 0.23 | 221482.26   | 486538.37   | 981319.07    | 2252142.21   | 0.64 | 97.82  | 187.62  | 347.14  | 743.96  |
| 0.24 | 169284.93   | 376393.67   | 759502.80    | 1740598.33   | 0.65 | 84.05  | 160.71  | 298.55  | 622.22  |
| 0.25 | 129510.64   | 288488.61   | 591635.15    | 1309537.26   | 0.66 | 71.75  | 136.40  | 252.44  | 517.25  |
| 0.26 | 101796.62   | 222966.85   | 449391.55    | 1033430.40   | 0.67 | 61.07  | 115.67  | 206.61  | 424.05  |
| 0.27 | 79868.83    | 173917.13   | 349452.10    | 798420.70    | 0.68 | 52.16  | 96.56   | 169.91  | 355.80  |
| 0.28 | 63069.96    | 136841.48   | 275975.90    | 614276.10    | 0.69 | 44.63  | 82.05   | 144.36  | 289.63  |
| 0.29 | 49605.44    | 108374.42   | 217364.10    | 478885.41    | 0.70 | 38.26  | 69.83   | 120.52  | 244.42  |
| 0.30 | 39299.91    | 85746.24    | 171571.34    | 391871.38    | 0.71 | 32.20  | 59.24   | 101.84  | 205.71  |
| 0.31 | 31630.20    | 68581.15    | 140645.87    | 315672.47    | 0.72 | 27.92  | 50.14   | 85.12   | 172.08  |
| 0.32 | 25371.98    | 54598.58    | 109454.20    | 256608.23    | 0.73 | 23.80  | 42.38   | 72.97   | 140.86  |
| 0.33 | 20479.65    | 43880.32    | 88305.62     | 205672.47    | 0.74 | 20.05  | 36.19   | 60.84   | 116.76  |
| 0.34 | 16445.06    | 35564.52    | 72318.89     | 164135.92    | 0.75 | 16.98  | 29.98   | 50.47   | 95.55   |
| 0.35 | 13469.24    | 29107.37    | 57241.44     | 132514.41    | 0.76 | 14.48  | 25.27   | 42.65   | 79.59   |
| 0.36 | 11076.96    | 23985.87    | 46766.18     | 107828.56    | 0.77 | 12.17  | 21.29   | 35.36   | 66.03   |
| 0.37 | 9089.49     | 19395.98    | 38118.33     | 89991.24     | 0.78 | 10.26  | 17.74   | 29.49   | 54.08   |
| 0.38 | 7504.40     | 16007.17    | 31920.24     | 72739.16     | 0.79 | 8.64   | 14.65   | 23.91   | 42.85   |
| 0.39 | 6223.45     | 13023.66    | 25740.54     | 59676.99     | 0.80 | 7.19   | 12.05   | 19.52   | 34.62   |
| 0.40 | 5094.99     | 10777.12    | 21315.58     | 49428.15     | 0.81 | 5.99   | 10.05   | 15.76   | 27.47   |
| 0.41 | 4313.58     | 9065.91     | 17727.29     | 40012.68     | 0.82 | 4.99   | 8.28    | 12.83   | 22.09   |
| 0.42 | 3590.19     | 7643.41     | 14793.85     | 33658.73     | 0.83 | 4.09   | 6.73    | 10.32   | 17.36   |
| 0.43 | 3014.44     | 6330.37     | 12267.40     | 27274.59     | 0.84 | 3.32   | 5.49    | 8.46    | 13.94   |
| 0.44 | 2546.14     | 5330.67     | 10222.63     | 22731.00     | 0.85 | 2.67   | 4.37    | 6.65    | 10.81   |
| 0.45 | 2119.78     | 4517.30     | 8617.15      | 19032.48     | 0.86 | 2.15   | 3.49    | 5.20    | 8.37    |
| 0.46 | 1770.02     | 3782.86     | 7422.30      | 16026.48     | 0.87 | 1.72   | 2.73    | 4.09    | 6.65    |
| 0.47 | 1508.67     | 3159.32     | 6175.52      | 13406.86     | 0.88 | 1.35   | 2.13    | 3.14    | 4.98    |
| 0.48 | 1286.29     | 2658.46     | 5185.77      | 11178.59     | 0.89 | 1.04   | 1.63    | 2.40    | 3.74    |
| 0.49 | 1080.51     | 2269.66     | 4454.69      | 9669.83      | 0.90 | 0.79   | 1.22    | 1.78    | 2.75    |
| 0.50 | 912.67      | 1908.97     | 3766.95      | 8125.98      |      |        |         |         |         |

Table S324: Critical values for detector  $\hat{H}_{mov,sn}^{m,0.1}$  with windows size  $n = 0.1$ , and FM-OLS and D-OLS estimation in a model with intercept and linear trend. The number of integrated regressors is 1 and the highest power of  $x_{kt}$  is 2.

| m    | 90 %         | 95 %         | 97,5 %       | 99 %          | m    | 90 %    | 95 %    | 97,5 %   | 99 %     |
|------|--------------|--------------|--------------|---------------|------|---------|---------|----------|----------|
| 0.10 | 142447741.64 | 350147123.07 | 747910772.84 | 1818686212.50 | 0.51 | 2820.65 | 6317.09 | 13326.87 | 31422.80 |
| 0.11 | 83161154.51  | 201655772.42 | 442993686.16 | 1039446538.63 | 0.52 | 2389.28 | 5340.92 | 11151.42 | 26422.52 |
| 0.12 | 48959957.21  | 122726667.84 | 266501336.08 | 638232964.82  | 0.53 | 2015.07 | 4513.52 | 9322.01  | 22820.24 |
| 0.13 | 30249030.54  | 73546929.60  | 161202351.86 | 391609368.99  | 0.54 | 1701.02 | 3826.34 | 8032.94  | 19196.95 |
| 0.14 | 19078323.04  | 47081953.24  | 104351630.19 | 246885042.71  | 0.55 | 1442.13 | 3243.67 | 6754.24  | 16232.79 |
| 0.15 | 12647996.14  | 30811638.23  | 66657128.51  | 161440572.33  | 0.56 | 1225.16 | 2739.10 | 5695.32  | 13693.05 |
| 0.16 | 8592600.52   | 21269181.31  | 44833252.77  | 107563797.41  | 0.57 | 1046.94 | 2307.17 | 4790.44  | 11689.60 |
| 0.17 | 5825863.00   | 14425304.29  | 31421483.40  | 71766111.74   | 0.58 | 882.79  | 1966.05 | 4058.25  | 10133.62 |
| 0.18 | 4094801.73   | 9990904.94   | 21628017.33  | 50909655.52   | 0.59 | 753.89  | 1670.76 | 3461.72  | 8521.89  |
| 0.19 | 2905673.65   | 6937520.51   | 15341250.22  | 35873178.87   | 0.60 | 649.81  | 1413.62 | 2910.02  | 7212.46  |
| 0.20 | 2102206.08   | 5045821.00   | 11074651.99  | 26308467.68   | 0.61 | 551.45  | 1191.98 | 2426.99  | 6060.04  |
| 0.21 | 1537368.36   | 3664563.37   | 8075219.58   | 19027205.32   | 0.62 | 470.21  | 1001.64 | 2054.66  | 4954.59  |
| 0.22 | 1136338.51   | 2705090.11   | 5894662.01   | 14494877.58   | 0.63 | 399.20  | 862.66  | 1737.88  | 4195.94  |
| 0.23 | 864099.34    | 2051253.55   | 4540975.26   | 10966442.62   | 0.64 | 339.80  | 730.86  | 1470.05  | 3528.14  |
| 0.24 | 661127.09    | 1559733.16   | 3459774.23   | 8296782.79    | 0.65 | 290.97  | 616.80  | 1247.50  | 2850.11  |
| 0.25 | 510458.17    | 1213256.02   | 2671227.15   | 6357105.31    | 0.66 | 247.50  | 519.08  | 1035.40  | 2391.31  |
| 0.26 | 389671.07    | 949322.02    | 2029222.56   | 4823138.48    | 0.67 | 211.21  | 437.03  | 870.47   | 1958.51  |
| 0.27 | 304516.95    | 728446.63    | 1564715.94   | 3776722.35    | 0.68 | 179.71  | 370.08  | 740.50   | 1602.55  |
| 0.28 | 238673.98    | 571578.55    | 1234936.58   | 2929065.25    | 0.69 | 152.59  | 310.98  | 613.54   | 1329.84  |
| 0.29 | 187440.20    | 445947.62    | 971991.10    | 2303064.83    | 0.70 | 129.29  | 261.98  | 504.96   | 1106.76  |
| 0.30 | 148056.47    | 350166.63    | 772755.23    | 1831458.91    | 0.71 | 109.44  | 217.16  | 422.53   | 943.36   |
| 0.31 | 118257.50    | 281735.07    | 614877.82    | 1508523.84    | 0.72 | 93.30   | 184.13  | 349.11   | 764.71   |
| 0.32 | 94920.13     | 229135.49    | 495286.47    | 1190587.38    | 0.73 | 79.00   | 154.19  | 290.05   | 630.45   |
| 0.33 | 77203.45     | 182372.02    | 392649.65    | 939854.48     | 0.74 | 66.82   | 128.61  | 238.92   | 526.54   |
| 0.34 | 62067.23     | 147543.41    | 316690.90    | 760304.21     | 0.75 | 56.60   | 107.84  | 198.55   | 428.05   |
| 0.35 | 49993.02     | 118766.66    | 257641.74    | 631056.95     | 0.76 | 48.04   | 90.33   | 164.34   | 347.71   |
| 0.36 | 40513.37     | 96844.36     | 209837.86    | 514583.26     | 0.77 | 40.52   | 75.54   | 136.22   | 281.05   |
| 0.37 | 33423.63     | 79612.46     | 173691.32    | 416248.52     | 0.78 | 34.23   | 62.52   | 112.92   | 228.62   |
| 0.38 | 27459.26     | 65035.99     | 141829.68    | 355235.84     | 0.79 | 28.78   | 51.80   | 92.60    | 188.06   |
| 0.39 | 22812.69     | 53412.41     | 115527.61    | 294836.73     | 0.80 | 24.03   | 42.95   | 75.31    | 148.99   |
| 0.40 | 18832.00     | 43916.95     | 96023.76     | 241219.62     | 0.81 | 20.05   | 35.52   | 60.70    | 119.34   |
| 0.41 | 15728.08     | 36962.47     | 79159.47     | 192473.59     | 0.82 | 16.68   | 29.18   | 48.76    | 96.28    |
| 0.42 | 13112.47     | 30898.54     | 65928.34     | 157616.43     | 0.83 | 13.68   | 23.80   | 39.32    | 75.39    |
| 0.43 | 10977.31     | 25483.96     | 55017.66     | 131572.86     | 0.84 | 11.29   | 19.41   | 31.61    | 59.26    |
| 0.44 | 9162.99      | 21483.66     | 46283.40     | 111833.86     | 0.85 | 9.28    | 15.61   | 25.00    | 45.47    |
| 0.45 | 7681.96      | 18059.97     | 38181.88     | 93661.95      | 0.86 | 7.58    | 12.44   | 19.70    | 35.30    |
| 0.46 | 6424.19      | 14957.91     | 31370.17     | 77532.22      | 0.87 | 6.19    | 9.96    | 15.54    | 27.41    |
| 0.47 | 5455.27      | 12662.79     | 26393.36     | 62913.09      | 0.88 | 4.99    | 7.91    | 11.94    | 20.77    |
| 0.48 | 4591.15      | 10500.10     | 22088.87     | 52838.44      | 0.89 | 3.98    | 6.22    | 9.29     | 15.64    |
| 0.49 | 3866.86      | 8758.77      | 18482.13     | 45232.04      | 0.90 | 3.13    | 4.80    | 7.04     | 11.42    |
| 0.50 | 3291.75      | 7413.92      | 15832.44     | 38065.49      |      |         |         |          |          |

Table S325: Critical values for detector  $\hat{H}_{mov,sn}^{m,0.1}$  with windows size  $n = 0.1$ , and IM-OLS estimation in a model with intercept and linear trend. The number of integrated regressors is 1 and the highest power of  $x_{kt}$  is 2.

| m    | 90 %        | 95 %         | 97,5 %       | 99 %         | m    | 90 %    | 95 %    | 97,5 %  | 99 %    |
|------|-------------|--------------|--------------|--------------|------|---------|---------|---------|---------|
| 0.10 | 46241118.10 | 104397938.43 | 216691622.24 | 496088856.27 | 0.51 | 1089.34 | 2243.00 | 4373.08 | 9383.79 |
| 0.11 | 26750358.75 | 60589987.11  | 125872559.62 | 293057775.49 | 0.52 | 925.60  | 1878.16 | 3600.85 | 7978.72 |
| 0.12 | 16224316.75 | 36889734.16  | 75206106.17  | 174437049.08 | 0.53 | 783.82  | 1577.75 | 3018.43 | 6572.74 |
| 0.13 | 10094051.35 | 22427316.42  | 46448702.15  | 108976017.43 | 0.54 | 668.18  | 1356.00 | 2565.94 | 5594.81 |
| 0.14 | 6518175.74  | 14545904.77  | 30054910.25  | 70371340.15  | 0.55 | 564.34  | 1145.81 | 2177.08 | 4746.48 |
| 0.15 | 4347803.81  | 9801614.17   | 19928700.04  | 47096967.82  | 0.56 | 484.58  | 969.80  | 1853.96 | 4029.15 |
| 0.16 | 2986488.14  | 6567227.35   | 13500361.46  | 30982729.94  | 0.57 | 415.21  | 816.97  | 1553.05 | 3330.70 |
| 0.17 | 2050145.59  | 4544972.82   | 9391964.97   | 21794117.25  | 0.58 | 354.09  | 689.29  | 1289.48 | 2836.43 |
| 0.18 | 1445537.49  | 3229917.86   | 6570864.47   | 14938218.45  | 0.59 | 299.78  | 584.40  | 1106.65 | 2362.34 |
| 0.19 | 1034997.69  | 2280734.44   | 4679055.51   | 10721011.68  | 0.60 | 252.66  | 501.42  | 927.18  | 2030.00 |
| 0.20 | 758870.40   | 1665042.89   | 3449297.25   | 7678061.41   | 0.61 | 215.20  | 420.85  | 783.22  | 1679.63 |
| 0.21 | 556351.82   | 1235601.77   | 2501545.59   | 5710178.83   | 0.62 | 183.83  | 352.18  | 638.85  | 1397.31 |
| 0.22 | 414817.49   | 925350.63    | 1873653.78   | 4318941.62   | 0.63 | 154.52  | 296.64  | 540.75  | 1164.93 |
| 0.23 | 315198.32   | 689831.50    | 1401008.41   | 3262181.41   | 0.64 | 129.59  | 247.30  | 452.68  | 953.71  |
| 0.24 | 240960.05   | 538615.97    | 1077854.93   | 2471126.91   | 0.65 | 110.50  | 210.30  | 385.80  | 798.91  |
| 0.25 | 185468.56   | 413100.28    | 845837.31    | 1905046.23   | 0.66 | 93.97   | 177.20  | 323.63  | 651.25  |
| 0.26 | 145380.42   | 316547.56    | 646160.88    | 1483377.19   | 0.67 | 79.54   | 148.70  | 261.63  | 535.30  |
| 0.27 | 114299.67   | 248130.58    | 502197.65    | 1141603.65   | 0.68 | 67.66   | 123.88  | 215.92  | 441.21  |
| 0.28 | 90153.97    | 196382.80    | 395529.58    | 884595.72    | 0.69 | 57.36   | 103.85  | 180.61  | 359.25  |
| 0.29 | 71476.18    | 155717.63    | 313183.26    | 704236.63    | 0.70 | 48.43   | 88.07   | 150.53  | 295.75  |
| 0.30 | 56613.25    | 123145.98    | 246671.15    | 566841.15    | 0.71 | 40.50   | 73.67   | 125.85  | 247.59  |
| 0.31 | 45647.07    | 98196.09     | 201660.84    | 457233.01    | 0.72 | 34.84   | 62.05   | 104.14  | 204.94  |
| 0.32 | 36509.53    | 78022.83     | 157395.84    | 369337.46    | 0.73 | 29.38   | 51.95   | 88.19   | 166.68  |
| 0.33 | 29573.33    | 62930.77     | 126488.45    | 297317.01    | 0.74 | 24.60   | 43.82   | 72.80   | 136.53  |
| 0.34 | 23690.74    | 50967.73     | 103841.53    | 238743.72    | 0.75 | 20.57   | 36.05   | 59.65   | 111.65  |
| 0.35 | 19323.46    | 41805.46     | 82287.38     | 191773.90    | 0.76 | 17.37   | 29.89   | 49.99   | 92.09   |
| 0.36 | 16009.28    | 34376.43     | 67818.72     | 155080.66    | 0.77 | 14.38   | 24.83   | 40.69   | 75.11   |
| 0.37 | 13148.63    | 27846.85     | 54960.56     | 129474.64    | 0.78 | 11.95   | 20.34   | 33.56   | 60.41   |
| 0.38 | 10765.03    | 22829.29     | 45591.00     | 104955.40    | 0.79 | 9.93    | 16.65   | 26.70   | 47.62   |
| 0.39 | 8920.08     | 18684.44     | 36830.79     | 85142.85     | 0.80 | 8.14    | 13.54   | 21.70   | 38.13   |
| 0.40 | 7306.60     | 15398.56     | 30187.01     | 70144.43     | 0.81 | 6.70    | 11.06   | 17.22   | 29.43   |
| 0.41 | 6169.88     | 12915.03     | 25146.85     | 56853.93     | 0.82 | 5.50    | 9.00    | 13.89   | 23.71   |
| 0.42 | 5153.45     | 10904.52     | 20990.18     | 48149.04     | 0.83 | 4.43    | 7.24    | 11.01   | 18.28   |
| 0.43 | 4293.55     | 9005.38      | 17336.59     | 38545.78     | 0.84 | 3.54    | 5.83    | 8.90    | 14.54   |
| 0.44 | 3621.91     | 7573.66      | 14470.02     | 32157.28     | 0.85 | 2.83    | 4.60    | 6.92    | 11.15   |
| 0.45 | 3002.49     | 6419.46      | 12155.82     | 26618.92     | 0.86 | 2.26    | 3.63    | 5.38    | 8.58    |
| 0.46 | 2521.93     | 5306.54      | 10378.81     | 22539.88     | 0.87 | 1.81    | 2.83    | 4.20    | 6.76    |
| 0.47 | 2141.75     | 4461.85      | 8693.25      | 18730.09     | 0.88 | 1.43    | 2.21    | 3.24    | 5.08    |
| 0.48 | 1820.83     | 3742.81      | 7328.10      | 15720.57     | 0.89 | 1.13    | 1.72    | 2.48    | 3.83    |
| 0.49 | 1525.28     | 3186.26      | 6215.26      | 13546.11     | 0.90 | 0.93    | 1.31    | 1.87    | 2.83    |
| 0.50 | 1280.24     | 2676.41      | 5233.59      | 11315.91     |      |         |         |         |         |

Table S326: Critical values for detector  $\hat{H}_{mov,sn}^{m,0.2}$  with windows size  $n = 0.2$ , and FM-OLS and D-OLS estimation in a model with intercept and linear trend. The number of integrated regressors is 1 and the highest power of  $x_{kt}$  is 2.

| m    | 90 %         | 95 %         | 97,5 %       | 99 %          | m    | 90 %    | 95 %    | 97,5 %   | 99 %     |
|------|--------------|--------------|--------------|---------------|------|---------|---------|----------|----------|
| 0.10 | 186012001.50 | 461999931.91 | 999032604.67 | 2424929491.52 | 0.51 | 3899.17 | 8678.44 | 18262.94 | 43241.04 |
| 0.11 | 109168505.35 | 269593194.97 | 593801664.40 | 1409525103.03 | 0.52 | 3308.67 | 7340.94 | 15246.88 | 36460.04 |
| 0.12 | 64851233.29  | 164441395.36 | 357501631.88 | 867165966.48  | 0.53 | 2795.28 | 6177.64 | 12893.89 | 31036.93 |
| 0.13 | 40587041.53  | 98397296.83  | 216844186.00 | 532249857.39  | 0.54 | 2351.38 | 5223.83 | 10891.92 | 26204.80 |
| 0.14 | 25899510.29  | 64019740.06  | 141211817.92 | 341294420.32  | 0.55 | 1972.17 | 4423.50 | 9214.32  | 21881.17 |
| 0.15 | 17175215.83  | 41994628.97  | 91315374.92  | 222735425.25  | 0.56 | 1685.82 | 3711.85 | 7611.23  | 18387.87 |
| 0.16 | 11728665.60  | 29303663.34  | 62007660.79  | 149966502.63  | 0.57 | 1426.60 | 3115.14 | 6453.90  | 15618.04 |
| 0.17 | 7979913.25   | 19868726.07  | 43763647.86  | 101260738.64  | 0.58 | 1203.62 | 2645.58 | 5450.33  | 13420.31 |
| 0.18 | 5659505.13   | 13882209.30  | 30399582.16  | 71790729.12   | 0.59 | 1023.68 | 2230.86 | 4647.43  | 11302.11 |
| 0.19 | 4026488.42   | 9725238.92   | 21571656.61  | 50396239.62   | 0.60 | 873.22  | 1887.81 | 3822.52  | 9421.26  |
| 0.20 | 2911640.21   | 7052234.33   | 15455994.80  | 37108595.88   | 0.61 | 736.43  | 1587.43 | 3183.78  | 7850.91  |
| 0.21 | 2153442.15   | 5113783.99   | 11341665.88  | 27265945.66   | 0.62 | 626.88  | 1331.37 | 2688.11  | 6515.57  |
| 0.22 | 1590044.44   | 3793560.88   | 8322798.18   | 20595100.32   | 0.63 | 529.72  | 1125.96 | 2263.16  | 5401.28  |
| 0.23 | 1218564.19   | 2872799.16   | 6463225.15   | 15720748.16   | 0.64 | 448.57  | 949.44  | 1909.50  | 4477.08  |
| 0.24 | 934226.42    | 2200211.29   | 4917936.65   | 11792001.60   | 0.65 | 384.68  | 801.87  | 1587.33  | 3649.39  |
| 0.25 | 714997.41    | 1717317.56   | 3773253.96   | 9170336.79    | 0.66 | 324.26  | 672.57  | 1316.72  | 3034.31  |
| 0.26 | 552594.34    | 1347935.53   | 2895477.20   | 7032363.81    | 0.67 | 273.65  | 558.39  | 1102.47  | 2442.41  |
| 0.27 | 433762.50    | 1039228.75   | 2230971.48   | 5439015.69    | 0.68 | 232.38  | 467.84  | 931.09   | 1970.82  |
| 0.28 | 339855.75    | 811690.90    | 1750554.58   | 4218278.92    | 0.69 | 195.41  | 393.49  | 758.52   | 1641.42  |
| 0.29 | 265864.48    | 634034.07    | 1380453.09   | 3310070.37    | 0.70 | 164.92  | 325.68  | 630.84   | 1348.32  |
| 0.30 | 211249.29    | 499737.68    | 1107056.60   | 2655542.87    | 0.71 | 139.11  | 270.29  | 518.31   | 1150.13  |
| 0.31 | 168556.52    | 402453.01    | 881473.80    | 2156536.78    | 0.72 | 117.24  | 225.34  | 423.57   | 910.43   |
| 0.32 | 134676.85    | 326751.30    | 705123.88    | 1711297.48    | 0.73 | 98.85   | 187.85  | 350.24   | 748.06   |
| 0.33 | 110036.16    | 261012.93    | 559870.61    | 1360423.55    | 0.74 | 82.13   | 155.29  | 284.22   | 617.63   |
| 0.34 | 88594.41     | 210715.93    | 452343.24    | 1092232.84    | 0.75 | 69.41   | 129.30  | 232.84   | 490.35   |
| 0.35 | 71472.50     | 169984.95    | 368734.45    | 911467.18     | 0.76 | 58.03   | 107.29  | 192.64   | 401.73   |
| 0.36 | 57834.29     | 137391.63    | 297365.89    | 742353.46     | 0.77 | 48.58   | 88.67   | 156.45   | 320.49   |
| 0.37 | 47609.45     | 113337.75    | 247770.86    | 596300.65     | 0.78 | 40.53   | 72.87   | 128.48   | 255.25   |
| 0.38 | 39330.45     | 92306.97     | 200469.30    | 509359.71     | 0.79 | 33.61   | 59.73   | 104.11   | 208.21   |
| 0.39 | 32492.80     | 75829.51     | 164103.97    | 421610.13     | 0.80 | 27.67   | 49.01   | 84.19    | 163.09   |
| 0.40 | 26857.10     | 62338.60     | 135598.11    | 341105.29     | 0.81 | 22.80   | 39.90   | 66.96    | 129.26   |
| 0.41 | 22204.09     | 52042.59     | 112223.84    | 274423.59     | 0.82 | 18.81   | 32.29   | 53.32    | 102.65   |
| 0.42 | 18506.62     | 43645.37     | 93155.14     | 224553.10     | 0.83 | 15.26   | 25.99   | 42.37    | 80.35    |
| 0.43 | 15508.10     | 36157.56     | 77803.48     | 186812.47     | 0.84 | 12.39   | 20.95   | 33.60    | 62.08    |
| 0.44 | 12896.47     | 30256.61     | 64579.35     | 158145.10     | 0.85 | 10.05   | 16.68   | 26.31    | 47.59    |
| 0.45 | 10800.66     | 25271.99     | 53711.95     | 131351.18     | 0.86 | 8.11    | 13.11   | 20.54    | 36.42    |
| 0.46 | 9068.88      | 21045.93     | 44131.06     | 109462.09     | 0.87 | 6.54    | 10.37   | 16.06    | 28.08    |
| 0.47 | 7665.66      | 17677.08     | 36905.11     | 88888.11      | 0.88 | 5.22    | 8.21    | 12.24    | 21.06    |
| 0.48 | 6446.36      | 14645.01     | 30839.48     | 73275.51      | 0.89 | 4.15    | 6.41    | 9.47     | 15.85    |
| 0.49 | 5416.06      | 12131.12     | 25826.17     | 62398.53      | 0.90 | 3.25    | 4.93    | 7.18     | 11.55    |
| 0.50 | 4600.15      | 10210.16     | 22055.22     | 51741.01      |      |         |         |          |          |

Table S327: Critical values for detector  $\hat{H}_{mov,sn}^{m,0.2}$  with windows size  $n = 0.2$ , and IM-OLS estimation in a model with intercept and linear trend. The number of integrated regressors is 1 and the highest power of  $x_{kt}$  is 2.



| m    | 90 %        | 95 %         | 97,5 %       | 99 %         | m    | 90 %    | 95 %    | 97,5 %  | 99 %     |
|------|-------------|--------------|--------------|--------------|------|---------|---------|---------|----------|
| 0.10 | 50411395.42 | 113548430.33 | 235711443.29 | 547996798.22 | 0.51 | 1194.04 | 2449.39 | 4727.16 | 10069.55 |
| 0.11 | 29424197.99 | 66522947.14  | 137493327.69 | 318547431.95 | 0.52 | 1012.54 | 2040.20 | 3899.51 | 8524.70  |
| 0.12 | 17876510.61 | 40835019.53  | 82395111.94  | 194019841.50 | 0.53 | 853.04  | 1710.14 | 3262.27 | 7067.45  |
| 0.13 | 11039414.49 | 24715139.88  | 51123259.37  | 119585870.50 | 0.54 | 727.64  | 1464.02 | 2766.96 | 6008.67  |
| 0.14 | 7207572.34  | 16141675.22  | 32957587.80  | 77750985.43  | 0.55 | 613.75  | 1234.40 | 2322.72 | 5050.29  |
| 0.15 | 4811195.54  | 10846795.08  | 22089029.47  | 52064771.55  | 0.56 | 523.20  | 1042.78 | 1980.98 | 4290.82  |
| 0.16 | 3300571.45  | 7273085.19   | 15042795.65  | 34625356.90  | 0.57 | 446.60  | 875.43  | 1649.74 | 3532.09  |
| 0.17 | 2285952.71  | 5031959.05   | 10542344.63  | 24241721.17  | 0.58 | 380.25  | 736.01  | 1367.50 | 2999.27  |
| 0.18 | 1615482.58  | 3597619.06   | 7293306.60   | 16788469.63  | 0.59 | 321.08  | 624.29  | 1166.24 | 2476.39  |
| 0.19 | 1149266.03  | 2550351.59   | 5208989.47   | 12029672.49  | 0.60 | 270.44  | 530.73  | 974.63  | 2130.04  |
| 0.20 | 849476.36   | 1859165.28   | 3844667.39   | 8712017.71   | 0.61 | 229.08  | 445.01  | 825.79  | 1749.56  |
| 0.21 | 619873.01   | 1372750.49   | 2818794.47   | 6362475.72   | 0.62 | 195.71  | 370.84  | 668.71  | 1455.27  |
| 0.22 | 465391.01   | 1035440.37   | 2094603.48   | 4812241.04   | 0.63 | 163.15  | 311.03  | 565.23  | 1208.11  |
| 0.23 | 352692.11   | 772363.95    | 1567819.13   | 3685857.63   | 0.64 | 136.54  | 258.62  | 469.93  | 987.48   |
| 0.24 | 270460.40   | 603629.25    | 1199731.99   | 2789468.70   | 0.65 | 115.82  | 219.09  | 399.90  | 820.53   |
| 0.25 | 208211.52   | 462221.41    | 945022.28    | 2151394.62   | 0.66 | 98.08   | 183.87  | 334.73  | 670.95   |
| 0.26 | 163118.28   | 353670.09    | 723497.94    | 1658715.24   | 0.67 | 82.73   | 153.81  | 269.12  | 551.36   |
| 0.27 | 128583.44   | 277329.66    | 561360.13    | 1289222.87   | 0.68 | 70.31   | 127.70  | 221.29  | 452.50   |
| 0.28 | 101253.68   | 220596.68    | 443302.19    | 993653.06    | 0.69 | 59.30   | 106.47  | 184.05  | 364.95   |
| 0.29 | 80222.04    | 173895.66    | 348453.84    | 786974.46    | 0.70 | 49.79   | 89.94   | 152.94  | 300.14   |
| 0.30 | 63596.07    | 137891.69    | 275703.93    | 636733.59    | 0.71 | 41.41   | 75.10   | 128.19  | 249.28   |
| 0.31 | 51094.92    | 109447.48    | 225287.54    | 508629.63    | 0.72 | 35.48   | 63.02   | 105.29  | 208.05   |
| 0.32 | 41032.00    | 87004.96     | 176045.79    | 411977.30    | 0.73 | 29.83   | 52.71   | 88.94   | 167.80   |
| 0.33 | 33178.30    | 70362.67     | 141988.76    | 331028.18    | 0.74 | 24.91   | 44.18   | 73.33   | 137.02   |
| 0.34 | 26565.41    | 57050.99     | 115520.87    | 267968.22    | 0.75 | 20.76   | 36.33   | 59.98   | 111.92   |
| 0.35 | 21699.89    | 46627.78     | 92130.25     | 214975.15    | 0.76 | 17.51   | 30.07   | 50.14   | 92.28    |
| 0.36 | 17941.96    | 38357.39     | 75116.95     | 173400.28    | 0.77 | 14.49   | 24.95   | 40.83   | 75.23    |
| 0.37 | 14712.20    | 31016.86     | 61049.15     | 143288.95    | 0.78 | 12.04   | 20.45   | 33.67   | 60.59    |
| 0.38 | 12061.07    | 25541.68     | 50751.47     | 116217.39    | 0.79 | 10.02   | 16.77   | 26.80   | 47.65    |
| 0.39 | 10007.22    | 20779.62     | 40890.98     | 94649.55     | 0.80 | 8.24    | 13.63   | 21.81   | 38.21    |
| 0.40 | 8164.89     | 17170.65     | 33559.99     | 77131.52     | 0.81 | 6.80    | 11.17   | 17.32   | 29.52    |
| 0.41 | 6864.02     | 14362.29     | 27740.72     | 62534.95     | 0.82 | 5.61    | 9.12    | 14.00   | 23.79    |
| 0.42 | 5743.99     | 12059.66     | 23071.56     | 53075.72     | 0.83 | 4.55    | 7.36    | 11.11   | 18.42    |
| 0.43 | 4765.77     | 9971.77      | 19167.82     | 42826.19     | 0.84 | 3.66    | 5.95    | 9.01    | 14.67    |
| 0.44 | 4012.33     | 8410.05      | 15968.43     | 35406.93     | 0.85 | 2.95    | 4.72    | 7.03    | 11.26    |
| 0.45 | 3333.68     | 7076.79      | 13399.18     | 29090.47     | 0.86 | 2.39    | 3.75    | 5.49    | 8.70     |
| 0.46 | 2795.16     | 5840.10      | 11335.57     | 24422.19     | 0.87 | 1.93    | 2.96    | 4.33    | 6.89     |
| 0.47 | 2373.82     | 4902.61      | 9461.33      | 20467.88     | 0.88 | 1.55    | 2.33    | 3.35    | 5.20     |
| 0.48 | 2002.65     | 4103.80      | 7984.63      | 17109.61     | 0.89 | 1.27    | 1.84    | 2.59    | 3.97     |
| 0.49 | 1678.08     | 3491.50      | 6763.80      | 14601.55     | 0.90 | 1.08    | 1.44    | 2.00    | 2.96     |
| 0.50 | 1405.64     | 2926.83      | 5691.21      | 12287.44     |      |         |         |         |          |

Table S328: Critical values for detector  $\hat{H}_{mov,sn}^{m,0.3}$  with windows size  $n = 0.3$ , and FM-OLS and D-OLS estimation in a model with intercept and linear trend. The number of integrated regressors is 1 and the highest power of  $x_{kt}$  is 2.

| m    | 90 %         | 95 %         | 97,5 %        | 99 %          | m    | 90 %    | 95 %    | 97,5 %   | 99 %     |
|------|--------------|--------------|---------------|---------------|------|---------|---------|----------|----------|
| 0.10 | 202641225.79 | 502264055.01 | 1087388815.17 | 2657180866.25 | 0.51 | 4247.47 | 9393.56 | 19932.55 | 46898.95 |
| 0.11 | 118234705.86 | 293048737.21 | 644900311.74  | 1550276514.71 | 0.52 | 3610.84 | 7962.09 | 16456.01 | 39105.71 |
| 0.12 | 70784351.01  | 178748871.79 | 392105147.71  | 956861111.69  | 0.53 | 3030.62 | 6647.90 | 13880.76 | 32797.09 |
| 0.13 | 44470611.61  | 108388792.80 | 239492694.09  | 590063122.97  | 0.54 | 2547.53 | 5608.02 | 11705.40 | 28043.77 |
| 0.14 | 28440514.53  | 69946220.31  | 156021866.27  | 377635619.83  | 0.55 | 2134.01 | 4769.17 | 9802.18  | 23293.36 |
| 0.15 | 18987074.41  | 45969307.97  | 100595024.15  | 246938677.11  | 0.56 | 1815.54 | 3964.04 | 8164.73  | 19433.73 |
| 0.16 | 12901419.76  | 32084620.34  | 69032991.70   | 166733146.27  | 0.57 | 1539.21 | 3319.25 | 6857.22  | 16417.48 |
| 0.17 | 8855134.61   | 21958632.12  | 48312647.49   | 112992332.83  | 0.58 | 1289.74 | 2816.20 | 5787.01  | 14032.33 |
| 0.18 | 6243060.53   | 15298862.58  | 33764803.22   | 79307100.85   | 0.59 | 1095.86 | 2362.10 | 4914.75  | 11831.51 |
| 0.19 | 4454250.02   | 10746104.68  | 23721514.89   | 55925516.76   | 0.60 | 931.77  | 2000.52 | 4032.81  | 9863.42  |
| 0.20 | 3234150.97   | 7780617.03   | 17112826.40   | 41716477.70   | 0.61 | 784.43  | 1669.98 | 3340.04  | 8123.93  |
| 0.21 | 2393724.83   | 5695449.32   | 12627677.13   | 30444260.05   | 0.62 | 663.01  | 1403.48 | 2829.61  | 6824.91  |
| 0.22 | 1765371.05   | 4234307.50   | 9265817.65    | 22895500.82   | 0.63 | 560.05  | 1186.80 | 2369.80  | 5604.58  |
| 0.23 | 1357189.03   | 3201803.23   | 7222321.16    | 17649682.26   | 0.64 | 472.01  | 993.34  | 1992.17  | 4604.18  |
| 0.24 | 1043211.60   | 2456758.20   | 5471264.02    | 13200318.99   | 0.65 | 402.24  | 839.15  | 1640.61  | 3741.96  |
| 0.25 | 798372.91    | 1901585.93   | 4179683.48    | 10335162.82   | 0.66 | 339.09  | 699.16  | 1356.22  | 3099.31  |
| 0.26 | 616912.18    | 1500729.91   | 3216569.69    | 7818321.83    | 0.67 | 285.40  | 576.57  | 1137.02  | 2490.20  |
| 0.27 | 482101.46    | 1151424.02   | 2483717.18    | 6084609.87    | 0.68 | 241.17  | 482.11  | 954.99   | 2006.00  |
| 0.28 | 379367.73    | 904620.38    | 1945811.21    | 4699115.65    | 0.69 | 202.44  | 403.41  | 777.77   | 1670.25  |
| 0.29 | 296012.71    | 710590.91    | 1545379.84    | 3691208.11    | 0.70 | 169.62  | 333.78  | 641.76   | 1371.09  |
| 0.30 | 235286.17    | 555160.63    | 1229976.96    | 2972893.97    | 0.71 | 142.74  | 275.37  | 524.71   | 1160.67  |
| 0.31 | 188092.66    | 447128.23    | 987845.93     | 2404068.10    | 0.72 | 119.97  | 229.40  | 429.63   | 916.90   |
| 0.32 | 150764.37    | 363948.02    | 786157.19     | 1888349.20    | 0.73 | 100.68  | 190.75  | 354.90   | 753.44   |
| 0.33 | 122400.54    | 290833.73    | 625688.86     | 1534262.83    | 0.74 | 83.41   | 157.01  | 286.65   | 623.23   |
| 0.34 | 98940.49     | 233659.93    | 503608.27     | 1215355.89    | 0.75 | 70.26   | 130.47  | 234.66   | 491.83   |
| 0.35 | 79500.57     | 189389.09    | 406606.25     | 1019343.33    | 0.76 | 58.68   | 108.25  | 193.29   | 402.94   |
| 0.36 | 64381.46     | 152476.55    | 330671.07     | 824219.95     | 0.77 | 48.94   | 89.11   | 157.06   | 321.36   |
| 0.37 | 52964.74     | 124791.75    | 274671.22     | 659157.40     | 0.78 | 40.76   | 73.17   | 128.78   | 255.68   |
| 0.38 | 43792.45     | 101901.73    | 221856.30     | 567440.91     | 0.79 | 33.79   | 59.90   | 104.38   | 208.45   |
| 0.39 | 35980.60     | 84128.49     | 182276.76     | 467626.44     | 0.80 | 27.79   | 49.12   | 84.35    | 163.25   |
| 0.40 | 29676.30     | 68643.40     | 149774.16     | 382188.82     | 0.81 | 22.92   | 40.03   | 67.03    | 129.42   |
| 0.41 | 24600.53     | 57472.07     | 124217.32     | 305585.37     | 0.82 | 18.91   | 32.40   | 53.42    | 102.75   |
| 0.42 | 20503.99     | 47943.93     | 103263.19     | 248512.91     | 0.83 | 15.36   | 26.11   | 42.43    | 80.51    |
| 0.43 | 17151.19     | 39822.48     | 85489.28      | 205358.74     | 0.84 | 12.50   | 21.05   | 33.71    | 62.15    |
| 0.44 | 14257.08     | 33217.46     | 70699.31      | 171848.51     | 0.85 | 10.16   | 16.79   | 26.46    | 47.72    |
| 0.45 | 11964.37     | 27732.45     | 58888.47      | 143010.73     | 0.86 | 8.22    | 13.21   | 20.66    | 36.52    |
| 0.46 | 9991.29      | 23166.68     | 48002.68      | 121294.15     | 0.87 | 6.66    | 10.50   | 16.18    | 28.18    |
| 0.47 | 8386.71      | 19390.99     | 40205.41      | 97092.12      | 0.88 | 5.34    | 8.31    | 12.36    | 21.13    |
| 0.48 | 7074.30      | 16064.58     | 33400.97      | 79749.77      | 0.89 | 4.27    | 6.53    | 9.59     | 15.96    |
| 0.49 | 5949.08      | 13222.36     | 28018.05      | 67494.80      | 0.90 | 3.36    | 5.04    | 7.30     | 11.65    |
| 0.50 | 5030.96      | 11151.36     | 23907.80      | 55613.79      |      |         |         |          |          |

Table S329: Critical values for detector  $\hat{H}_{mov,sn}^{m,0.3}$  with windows size  $n = 0.3$ , and IM-OLS estimation in a model with intercept and linear trend. The number of integrated regressors is 1 and the highest power of  $x_{kt}$  is 2.

| m    | 90 %         | 95 %          | 97,5 %        | 99 %           | m    | 90 %    | 95 %     | 97,5 %   | 99 %      |
|------|--------------|---------------|---------------|----------------|------|---------|----------|----------|-----------|
| 0.10 | 938310916.85 | 3396133197.08 | 9788936704.21 | 32989046557.24 | 0.51 | 3336.93 | 12037.47 | 35369.68 | 106116.33 |
| 0.11 | 498094079.24 | 1843491478.25 | 5394223996.65 | 17366525333.62 | 0.52 | 2739.24 | 9913.29  | 28626.23 | 88360.79  |
| 0.12 | 279162631.06 | 1037466836.61 | 3078538079.95 | 9995576811.33  | 0.53 | 2303.89 | 8277.20  | 23602.93 | 70714.69  |
| 0.13 | 164555989.57 | 610572694.12  | 1857849789.08 | 6008637153.39  | 0.54 | 1877.41 | 6818.58  | 19256.40 | 58821.58  |
| 0.14 | 97180077.26  | 362082306.15  | 1105374645.14 | 3794922184.98  | 0.55 | 1521.90 | 5495.53  | 15434.40 | 48256.47  |
| 0.15 | 61466509.60  | 221768776.23  | 664404191.72  | 2346727348.33  | 0.56 | 1246.69 | 4413.53  | 12787.79 | 40131.91  |
| 0.16 | 39878920.28  | 138590480.32  | 418910266.93  | 1391655179.00  | 0.57 | 992.67  | 3525.67  | 10262.04 | 32065.91  |
| 0.17 | 26538095.24  | 96417022.57   | 267549330.49  | 899897804.76   | 0.58 | 806.40  | 2895.11  | 8343.72  | 26148.67  |
| 0.18 | 17946483.69  | 64639092.61   | 188715206.81  | 619586879.63   | 0.59 | 656.59  | 2329.41  | 6694.17  | 21519.35  |
| 0.19 | 12064829.04  | 44213145.81   | 128761461.35  | 421363949.58   | 0.60 | 536.24  | 1919.68  | 5455.50  | 17570.60  |
| 0.20 | 8336482.03   | 30301189.86   | 88187469.46   | 289025836.74   | 0.61 | 438.54  | 1580.93  | 4458.32  | 13851.18  |
| 0.21 | 5833468.99   | 21262420.46   | 63370094.97   | 203014471.16   | 0.62 | 356.96  | 1258.35  | 3606.27  | 11097.78  |
| 0.22 | 4241901.74   | 15135783.63   | 45184682.60   | 148543138.25   | 0.63 | 291.50  | 1004.70  | 2921.42  | 8807.66   |
| 0.23 | 3054936.03   | 11023344.38   | 32683925.85   | 10644987.24    | 0.64 | 238.00  | 807.24   | 2339.13  | 7052.65   |
| 0.24 | 2206838.34   | 8129881.55    | 23299829.68   | 76163319.29    | 0.65 | 192.87  | 661.42   | 1883.97  | 5459.19   |
| 0.25 | 1604303.93   | 5842145.08    | 17006734.51   | 56820817.30    | 0.66 | 157.48  | 541.42   | 1480.20  | 4326.93   |
| 0.26 | 1197933.38   | 4289494.09    | 12242661.90   | 40486938.78    | 0.67 | 126.01  | 437.54   | 1165.22  | 3450.46   |
| 0.27 | 905573.34    | 3263748.23    | 9288563.94    | 30572331.85    | 0.68 | 105.08  | 346.62   | 932.07   | 2791.27   |
| 0.28 | 674727.74    | 2476079.09    | 6920689.74    | 22106282.76    | 0.69 | 83.46   | 275.50   | 737.84   | 2205.81   |
| 0.29 | 510366.27    | 1816940.62    | 5407383.80    | 17272427.23    | 0.70 | 68.13   | 217.89   | 577.22   | 1741.60   |
| 0.30 | 393184.25    | 1385597.44    | 4041094.83    | 13100657.89    | 0.71 | 54.56   | 178.51   | 458.69   | 1394.82   |
| 0.31 | 302040.19    | 1087522.72    | 3086420.63    | 10132828.88    | 0.72 | 44.52   | 141.30   | 369.33   | 1100.06   |
| 0.32 | 236363.11    | 850835.13     | 2431659.83    | 7851962.24     | 0.73 | 35.94   | 109.75   | 290.99   | 818.81    |
| 0.33 | 183198.48    | 648113.11     | 1928150.70    | 6152985.18     | 0.74 | 28.71   | 87.04    | 228.66   | 657.58    |
| 0.34 | 141366.96    | 512029.83     | 1557627.97    | 4896395.51     | 0.75 | 22.96   | 69.48    | 183.63   | 521.32    |
| 0.35 | 111764.53    | 406031.02     | 1158834.07    | 3908445.61     | 0.76 | 18.47   | 56.15    | 140.04   | 387.41    |
| 0.36 | 89015.39     | 319342.12     | 920863.64     | 2995770.34     | 0.77 | 14.84   | 44.45    | 106.28   | 301.08    |
| 0.37 | 69619.08     | 253577.22     | 728014.65     | 2328417.77     | 0.78 | 11.75   | 34.60    | 84.44    | 223.63    |
| 0.38 | 55904.18     | 203627.30     | 600384.86     | 1887258.20     | 0.79 | 9.44    | 27.12    | 64.54    | 176.04    |
| 0.39 | 43668.70     | 158722.60     | 463925.55     | 1508881.26     | 0.80 | 7.54    | 21.10    | 51.22    | 131.88    |
| 0.40 | 34867.45     | 128415.46     | 365808.79     | 1178102.46     | 0.81 | 5.94    | 16.24    | 38.08    | 98.49     |
| 0.41 | 27789.32     | 101089.28     | 293813.27     | 928500.10      | 0.82 | 4.79    | 12.30    | 29.32    | 75.96     |
| 0.42 | 22060.24     | 82184.74      | 241062.35     | 756538.68      | 0.83 | 3.72    | 9.39     | 21.75    | 57.00     |
| 0.43 | 18048.32     | 64844.71      | 193736.55     | 600355.93      | 0.84 | 2.95    | 7.06     | 16.23    | 41.91     |
| 0.44 | 14538.50     | 52282.84      | 148699.03     | 475868.62      | 0.85 | 2.30    | 5.41     | 12.17    | 29.67     |
| 0.45 | 11756.82     | 43308.05      | 123165.40     | 371221.88      | 0.86 | 1.80    | 4.03     | 8.63     | 21.59     |
| 0.46 | 9534.65      | 35047.72      | 98389.25      | 304784.92      | 0.87 | 1.38    | 2.99     | 6.29     | 15.11     |
| 0.47 | 7690.76      | 28293.41      | 81874.56      | 246347.64      | 0.88 | 1.06    | 2.16     | 4.37     | 10.20     |
| 0.48 | 6189.72      | 22793.92      | 63483.67      | 196311.20      | 0.89 | 0.80    | 1.57     | 3.08     | 6.88      |
| 0.49 | 5121.58      | 18713.05      | 53264.00      | 155182.68      | 0.90 | 0.59    | 1.13     | 2.09     | 4.70      |
| 0.50 | 4156.57      | 14913.03      | 43477.55      | 130736.08      |      |         |          |          |           |

Table S330: Critical values for detector  $\hat{H}_{mov,sn}^{m,0.1}$  with windows size  $n = 0.1$ , and FM-OLS and D-OLS estimation in a model with intercept. The number of integrated regressors is 1 and the highest power of  $x_{kt}$  is 3.

| m    | 90 %           | 95 %           | 97.5 %          | 99 %            | m    | 90 %     | 95 %      | 97.5 %    | 99 %       |
|------|----------------|----------------|-----------------|-----------------|------|----------|-----------|-----------|------------|
| 0.10 | 12074602111.81 | 48462558071.23 | 154206909296.82 | 590113754479.03 | 0.51 | 40162.06 | 151069.40 | 479744.80 | 1698224.95 |
| 0.11 | 6465664570.23  | 26145685031.58 | 82623589758.17  | 302920569506.70 | 0.52 | 32557.60 | 125124.71 | 385288.91 | 1425908.58 |
| 0.12 | 3655683197.88  | 14463187154.12 | 46067060386.93  | 158756125187.04 | 0.53 | 25979.44 | 100655.94 | 315358.38 | 1147021.45 |
| 0.13 | 2105866831.19  | 8543981305.45  | 26978007401.78  | 93462401927.34  | 0.54 | 21351.78 | 83346.00  | 255741.87 | 952239.88  |
| 0.14 | 1275683718.96  | 5154055560.42  | 16484243015.78  | 59061406796.22  | 0.55 | 17602.59 | 66846.01  | 206813.45 | 778056.57  |
| 0.15 | 817566364.93   | 3244287075.21  | 10145095061.79  | 36908933483.32  | 0.56 | 14331.92 | 55140.42  | 170184.29 | 577129.73  |
| 0.16 | 516924047.29   | 2014542704.06  | 6520632181.68   | 23662864061.54  | 0.57 | 11535.08 | 44380.57  | 138220.39 | 467258.99  |
| 0.17 | 335173493.61   | 1335410685.77  | 4362889230.47   | 15336825208.05  | 0.58 | 9488.03  | 36892.90  | 113245.69 | 382077.24  |
| 0.18 | 225145348.78   | 889138922.47   | 2889227378.08   | 10765369104.53  | 0.59 | 7701.79  | 29340.74  | 90740.18  | 317112.37  |
| 0.19 | 156229805.83   | 602005322.22   | 1958118514.00   | 7239776546.39   | 0.60 | 6266.35  | 23514.90  | 74487.59  | 256562.93  |
| 0.20 | 106311268.44   | 415155807.87   | 1325171216.32   | 5111780105.94   | 0.61 | 5062.74  | 19096.19  | 60561.52  | 205369.90  |
| 0.21 | 73360360.71    | 293363429.74   | 945494574.98    | 3493390199.16   | 0.62 | 4177.26  | 15668.12  | 48118.72  | 166116.21  |
| 0.22 | 53542736.96    | 213110239.00   | 662383720.44    | 2522630067.90   | 0.63 | 3364.48  | 12517.51  | 37808.93  | 132042.67  |
| 0.23 | 39162023.29    | 155165180.87   | 491597835.86    | 1805081331.62   | 0.64 | 2721.71  | 10097.95  | 30502.96  | 104072.03  |
| 0.24 | 28322135.15    | 110726638.75   | 345626123.60    | 1282983314.40   | 0.65 | 2200.81  | 8161.47   | 23812.37  | 81973.48   |
| 0.25 | 20742357.30    | 80667468.64    | 255692390.53    | 897830652.12    | 0.66 | 1770.94  | 6562.63   | 19106.13  | 66439.00   |
| 0.26 | 15379307.50    | 60708237.86    | 190542826.94    | 665352269.85    | 0.67 | 1421.08  | 5300.04   | 15349.33  | 50578.04   |
| 0.27 | 11267120.34    | 44797032.89    | 139597747.71    | 505170384.39    | 0.68 | 1153.44  | 4286.12   | 12106.38  | 40341.49   |
| 0.28 | 8603967.14     | 33402137.73    | 106190682.03    | 361784045.45    | 0.69 | 937.91   | 3463.17   | 9798.73   | 31727.44   |
| 0.29 | 6403223.46     | 24894907.19    | 78588404.95     | 273598881.88    | 0.70 | 760.70   | 2750.78   | 7821.36   | 25211.78   |
| 0.30 | 4802483.10     | 19215296.39    | 60916420.11     | 205788649.11    | 0.71 | 605.18   | 2201.97   | 6343.63   | 20060.46   |
| 0.31 | 3779150.36     | 14977897.40    | 48781847.29     | 163994729.96    | 0.72 | 484.45   | 1737.65   | 4999.99   | 15648.80   |
| 0.32 | 2915306.14     | 11820255.79    | 38018322.63     | 128739778.95    | 0.73 | 386.46   | 1376.72   | 3997.07   | 12804.57   |
| 0.33 | 2258969.73     | 9330946.65     | 28868690.47     | 104561537.67    | 0.74 | 308.92   | 1088.65   | 3082.35   | 9893.41    |
| 0.34 | 1767127.63     | 7273473.51     | 22339053.64     | 79712270.70     | 0.75 | 247.90   | 865.39    | 2412.82   | 7530.50    |
| 0.35 | 1371832.80     | 5634836.68     | 17562395.37     | 63593637.80     | 0.76 | 194.46   | 672.87    | 1849.89   | 5830.19    |
| 0.36 | 1091378.36     | 4458913.80     | 14048621.25     | 49515073.51     | 0.77 | 152.09   | 523.72    | 1447.18   | 4533.99    |
| 0.37 | 856725.35      | 3494923.99     | 10948683.61     | 39219973.57     | 0.78 | 119.17   | 406.35    | 1117.45   | 3499.13    |
| 0.38 | 682897.48      | 2769693.45     | 8720549.15      | 31348218.69     | 0.79 | 93.87    | 316.34    | 868.85    | 2595.43    |
| 0.39 | 542894.89      | 2225023.31     | 6980260.71      | 24937410.72     | 0.80 | 71.81    | 243.50    | 666.88    | 1991.40    |
| 0.40 | 438157.47      | 1738158.65     | 5486382.54      | 19756696.97     | 0.81 | 55.94    | 186.80    | 505.65    | 1519.32    |
| 0.41 | 342145.49      | 1375565.67     | 4317679.97      | 15853939.45     | 0.82 | 43.78    | 143.58    | 386.43    | 1152.71    |
| 0.42 | 275869.90      | 1089909.90     | 3436907.56      | 12353790.49     | 0.83 | 33.79    | 107.18    | 289.07    | 860.34     |
| 0.43 | 219682.70      | 875224.10      | 2726328.40      | 9778877.41      | 0.84 | 25.82    | 80.35     | 214.15    | 628.80     |
| 0.44 | 174067.37      | 695555.91      | 2225267.31      | 7795113.20      | 0.85 | 19.25    | 59.19     | 153.27    | 453.69     |
| 0.45 | 141223.26      | 560848.31      | 1782513.65      | 6172945.53      | 0.86 | 14.70    | 43.10     | 110.71    | 321.24     |
| 0.46 | 114380.97      | 451647.07      | 1431449.28      | 4906984.04      | 0.87 | 10.93    | 31.12     | 77.33     | 224.19     |
| 0.47 | 92999.29       | 358446.71      | 1136952.10      | 3951025.40      | 0.88 | 8.13     | 22.12     | 53.81     | 146.67     |
| 0.48 | 74233.48       | 287296.03      | 913042.22       | 3143058.27      | 0.89 | 5.98     | 15.66     | 36.84     | 99.27      |
| 0.49 | 59516.85       | 232431.22      | 739677.54       | 2581450.81      | 0.90 | 4.35     | 10.83     | 24.60     | 66.15      |
| 0.50 | 48512.81       | 188724.00      | 586876.50       | 2053109.06      |      |          |           |           |            |

Table S331: Critical values for detector  $\hat{H}_{mov,sn}^{m,0.1}$  with windows size  $n = 0.1$ , and IM-OLS estimation in a model with intercept. The number of integrated regressors is 1 and the highest power of  $x_{kt}$  is 3.

| m    | 90 %          | 95 %          | 97,5 %         | 99 %           | m    | 90 %    | 95 %     | 97,5 %   | 99 %      |
|------|---------------|---------------|----------------|----------------|------|---------|----------|----------|-----------|
| 0.10 | 1395587841.88 | 5072928564.38 | 14611176569.39 | 49673913015.75 | 0.51 | 4519.01 | 16132.42 | 46623.79 | 140684.94 |
| 0.11 | 737010344.73  | 2761677673.05 | 8026026245.58  | 26340389824.83 | 0.52 | 3709.42 | 13256.80 | 38220.07 | 115209.72 |
| 0.12 | 410746671.14  | 1544312692.66 | 4641797526.66  | 15136217955.20 | 0.53 | 3070.55 | 10849.14 | 31506.58 | 94373.90  |
| 0.13 | 242209511.76  | 910203963.65  | 2760816912.82  | 9128058229.36  | 0.54 | 2505.19 | 9038.31  | 25701.86 | 76521.04  |
| 0.14 | 144137973.49  | 536750211.78  | 1655195501.41  | 5716319999.33  | 0.55 | 2021.30 | 7178.99  | 20302.26 | 61382.40  |
| 0.15 | 91124344.95   | 331645493.20  | 996952731.56   | 3494403111.44  | 0.56 | 1639.22 | 5848.87  | 16649.88 | 52049.93  |
| 0.16 | 58362824.43   | 206269306.44  | 627825451.68   | 2095233928.43  | 0.57 | 1307.28 | 4591.44  | 13312.84 | 41074.39  |
| 0.17 | 39084914.27   | 142349881.62  | 402770532.66   | 1326520717.08  | 0.58 | 1063.51 | 3735.06  | 10761.93 | 33168.33  |
| 0.18 | 26361136.43   | 95701515.23   | 276815841.32   | 921699357.74   | 0.59 | 854.74  | 2983.12  | 8521.59  | 26861.36  |
| 0.19 | 17655616.42   | 64996431.37   | 189281061.02   | 625356842.82   | 0.60 | 693.02  | 2459.22  | 6797.95  | 21458.40  |
| 0.20 | 12287598.34   | 44774217.88   | 130782900.63   | 425623399.60   | 0.61 | 562.43  | 2015.72  | 5575.65  | 17176.19  |
| 0.21 | 8540782.96    | 31192200.10   | 93072162.56    | 301263808.19   | 0.62 | 455.93  | 1574.67  | 4478.32  | 13491.56  |
| 0.22 | 6208696.72    | 22265443.76   | 66371854.92    | 220940404.55   | 0.63 | 369.86  | 1268.52  | 3599.41  | 10725.94  |
| 0.23 | 4453813.55    | 16193993.90   | 48614861.09    | 155275337.51   | 0.64 | 299.80  | 1009.38  | 2838.27  | 8563.25   |
| 0.24 | 3231342.37    | 11816683.23   | 34390958.41    | 110272764.51   | 0.65 | 241.31  | 825.13   | 2266.31  | 6498.43   |
| 0.25 | 2352896.79    | 8457444.17    | 24947504.03    | 84480929.15    | 0.66 | 196.72  | 659.43   | 1776.23  | 5166.09   |
| 0.26 | 1748450.81    | 6287015.12    | 17808553.49    | 60278283.92    | 0.67 | 157.02  | 527.16   | 1413.71  | 4123.12   |
| 0.27 | 1318332.73    | 4750618.67    | 13617024.61    | 44366492.68    | 0.68 | 129.07  | 419.95   | 1113.78  | 3238.59   |
| 0.28 | 976916.74     | 3576194.30    | 10132582.76    | 31721838.02    | 0.69 | 101.96  | 333.41   | 881.18   | 2558.99   |
| 0.29 | 739102.95     | 2645773.31    | 7781391.03     | 25057312.22    | 0.70 | 82.50   | 258.32   | 675.11   | 2008.64   |
| 0.30 | 566508.12     | 2028364.99    | 5836011.50     | 18822620.75    | 0.71 | 65.40   | 211.64   | 531.12   | 1617.07   |
| 0.31 | 436497.10     | 1547659.64    | 4491115.15     | 14609193.76    | 0.72 | 53.22   | 164.40   | 424.39   | 1248.03   |
| 0.32 | 335830.59     | 1220162.16    | 3491492.02     | 11287973.04    | 0.73 | 42.59   | 128.46   | 328.49   | 927.70    |
| 0.33 | 262828.48     | 941289.43     | 2718057.51     | 8881409.64     | 0.74 | 33.84   | 100.80   | 258.15   | 736.25    |
| 0.34 | 200598.15     | 734125.38     | 2187012.89     | 6893925.93     | 0.75 | 26.92   | 78.44    | 203.82   | 572.73    |
| 0.35 | 158225.38     | 584076.26     | 1645759.99     | 5490524.13     | 0.76 | 21.43   | 62.89    | 155.65   | 427.83    |
| 0.36 | 126554.54     | 451509.31     | 1318663.12     | 4280263.84     | 0.77 | 16.91   | 49.52    | 117.11   | 325.84    |
| 0.37 | 99142.78      | 358868.35     | 1026580.16     | 3234385.29     | 0.78 | 13.26   | 37.96    | 91.74    | 242.53    |
| 0.38 | 78677.96      | 287145.07     | 834554.74      | 2657267.34     | 0.79 | 10.57   | 29.60    | 69.04    | 189.24    |
| 0.39 | 61596.08      | 221799.46     | 640323.89      | 2075598.54     | 0.80 | 8.40    | 22.82    | 54.66    | 139.90    |
| 0.40 | 48883.38      | 177795.41     | 504290.07      | 1632647.04     | 0.81 | 6.49    | 17.27    | 40.01    | 101.96    |
| 0.41 | 38598.29      | 141576.40     | 409602.25      | 1308448.69     | 0.82 | 5.18    | 12.94    | 30.43    | 78.42     |
| 0.42 | 31023.38      | 114070.76     | 333443.82      | 1042951.90     | 0.83 | 4.01    | 9.84     | 22.45    | 58.18     |
| 0.43 | 25116.21      | 91062.51      | 262403.52      | 818404.16      | 0.84 | 3.14    | 7.31     | 16.66    | 42.82     |
| 0.44 | 20095.23      | 72466.17      | 205954.43      | 654154.50      | 0.85 | 2.42    | 5.60     | 12.44    | 30.20     |
| 0.45 | 16313.91      | 59413.49      | 167874.42      | 511363.48      | 0.86 | 1.89    | 4.15     | 8.76     | 21.78     |
| 0.46 | 13037.24      | 47668.03      | 135977.18      | 419739.65      | 0.87 | 1.45    | 3.06     | 6.38     | 15.21     |
| 0.47 | 10519.09      | 38535.10      | 111704.46      | 329530.52      | 0.88 | 1.12    | 2.21     | 4.44     | 10.24     |
| 0.48 | 8438.32       | 30869.25      | 85381.23       | 262409.46      | 0.89 | 0.91    | 1.64     | 3.14     | 6.94      |
| 0.49 | 7017.71       | 25061.09      | 71956.63       | 204963.26      | 0.90 | 0.76    | 1.20     | 2.16     | 4.76      |
| 0.50 | 5652.34       | 20095.24      | 58634.49       | 174365.64      |      |         |          |          |           |

Table S332: Critical values for detector  $\hat{H}_{mov,sn}^{m,0.2}$  with windows size  $n = 0.2$ , and FM-OLS and D-OLS estimation in a model with intercept. The number of integrated regressors is 1 and the highest power of  $x_{kt}$  is 3.

| m    | 90 %           | 95 %           | 97.5 %          | 99 %            | m    | 90 %     | 95 %      | 97.5 %    | 99 %       |
|------|----------------|----------------|-----------------|-----------------|------|----------|-----------|-----------|------------|
| 0.10 | 17892020568.45 | 71931541359.57 | 233857911178.30 | 876594862793.33 | 0.51 | 53714.63 | 202439.82 | 623985.48 | 2241890.06 |
| 0.11 | 9542440708.57  | 38852982949.17 | 124219077384.38 | 458654312501.57 | 0.52 | 43595.94 | 166030.15 | 515723.86 | 1867545.68 |
| 0.12 | 5413143479.12  | 21765763667.53 | 68367741084.28  | 239159696437.20 | 0.53 | 34742.61 | 133460.18 | 414277.65 | 1526821.93 |
| 0.13 | 3119850459.18  | 12663463088.74 | 40573070645.40  | 141771454927.00 | 0.54 | 28188.31 | 109981.29 | 338041.63 | 1225946.58 |
| 0.14 | 1894232493.81  | 7684188174.45  | 24606353621.85  | 85313822383.37  | 0.55 | 23136.42 | 88500.35  | 270873.88 | 982052.68  |
| 0.15 | 1203176073.45  | 4818543419.91  | 15223736329.37  | 55318389432.59  | 0.56 | 18846.41 | 71315.60  | 221323.82 | 754874.16  |
| 0.16 | 764749528.59   | 3014700259.57  | 9666494241.73   | 34879052226.54  | 0.57 | 15101.56 | 58073.43  | 179123.80 | 600880.31  |
| 0.17 | 491814011.92   | 1965635214.88  | 6511322101.13   | 22984233557.50  | 0.58 | 12365.85 | 47246.30  | 144570.10 | 482499.75  |
| 0.18 | 329291010.06   | 1325133709.91  | 4249999816.61   | 16036632349.06  | 0.59 | 9865.83  | 37930.91  | 115238.32 | 399474.29  |
| 0.19 | 227746351.18   | 890231455.68   | 2869203737.05   | 10756498041.33  | 0.60 | 8065.51  | 30116.79  | 93803.30  | 320248.35  |
| 0.20 | 154206059.16   | 617339260.25   | 1955279597.91   | 7566681709.27   | 0.61 | 6414.70  | 23964.54  | 74540.76  | 256987.84  |
| 0.21 | 106881053.71   | 433415700.06   | 1382653129.78   | 5147603586.52   | 0.62 | 5274.24  | 19578.60  | 59839.58  | 202457.32  |
| 0.22 | 77551376.38    | 313452440.34   | 978683014.43    | 3694357632.66   | 0.63 | 4299.19  | 15635.56  | 47149.10  | 163679.88  |
| 0.23 | 56956531.30    | 226906540.39   | 717154987.88    | 2638357492.77   | 0.64 | 3408.27  | 12448.22  | 37279.41  | 126803.58  |
| 0.24 | 41371319.07    | 162940518.80   | 507560662.99    | 1861829339.24   | 0.65 | 2747.11  | 10003.70  | 29099.25  | 98893.45   |
| 0.25 | 30086081.56    | 117923399.86   | 371993118.25    | 1326943602.68   | 0.66 | 2216.89  | 8012.26   | 23115.36  | 79526.86   |
| 0.26 | 22050684.58    | 88722178.32    | 276743654.90    | 964271321.48    | 0.67 | 1752.86  | 6347.08   | 18314.55  | 60747.45   |
| 0.27 | 16197865.39    | 65337707.51    | 205572985.11    | 733492711.25    | 0.68 | 1420.69  | 5160.39   | 14476.22  | 47765.80   |
| 0.28 | 12313344.36    | 48116295.84    | 154055386.52    | 534293265.65    | 0.69 | 1142.53  | 4161.86   | 11536.75  | 36865.05   |
| 0.29 | 9203665.44     | 35844416.87    | 115105917.85    | 396622626.72    | 0.70 | 916.75   | 3258.24   | 9174.82   | 29055.64   |
| 0.30 | 6860583.03     | 27407257.66    | 87107521.27     | 297620517.19    | 0.71 | 720.47   | 2565.29   | 7321.02   | 22818.39   |
| 0.31 | 5390645.85     | 21645423.21    | 69611945.94     | 237410240.65    | 0.72 | 576.21   | 2018.18   | 5727.44   | 17667.24   |
| 0.32 | 4177076.85     | 16826672.29    | 54140286.26     | 186310095.10    | 0.73 | 452.84   | 1572.68   | 4550.02   | 14238.91   |
| 0.33 | 3217904.67     | 13214669.12    | 41015225.37     | 150423678.67    | 0.74 | 362.14   | 1247.58   | 3471.17   | 11119.04   |
| 0.34 | 2510495.12     | 10288892.09    | 31756050.04     | 113628538.75    | 0.75 | 285.51   | 983.84    | 2674.02   | 8329.19    |
| 0.35 | 1955326.20     | 8063539.02     | 24751655.12     | 89582738.22     | 0.76 | 225.03   | 750.29    | 2043.07   | 6325.49    |
| 0.36 | 1534255.00     | 6327280.59     | 19936826.13     | 69753976.36     | 0.77 | 173.93   | 577.84    | 1574.32   | 4891.14    |
| 0.37 | 1211828.07     | 4914189.65     | 15231210.80     | 55232653.75     | 0.78 | 134.73   | 446.32    | 1211.60   | 3691.92    |
| 0.38 | 958876.30      | 3918581.53     | 12233650.47     | 44384483.78     | 0.79 | 104.05   | 343.07    | 929.00    | 2737.96    |
| 0.39 | 762903.48      | 3100914.28     | 9810159.19      | 34795425.71     | 0.80 | 78.75    | 262.33    | 706.29    | 2084.99    |
| 0.40 | 607563.18      | 2443018.36     | 7602966.17      | 27688739.32     | 0.81 | 61.32    | 198.93    | 530.40    | 1571.02    |
| 0.41 | 477688.88      | 1923448.48     | 6069603.47      | 21895184.69     | 0.82 | 47.28    | 151.58    | 406.05    | 1188.82    |
| 0.42 | 384053.85      | 1517666.96     | 4817428.20      | 16888927.81     | 0.83 | 36.11    | 112.34    | 297.65    | 879.96     |
| 0.43 | 305640.22      | 1210428.30     | 3806408.03      | 13494290.30     | 0.84 | 27.36    | 83.10     | 219.34    | 645.12     |
| 0.44 | 241333.41      | 953384.15      | 3076176.58      | 10742260.28     | 0.85 | 20.21    | 60.74     | 156.53    | 459.83     |
| 0.45 | 195254.62      | 770216.95      | 2458365.58      | 8474073.92      | 0.86 | 15.22    | 44.05     | 112.34    | 322.36     |
| 0.46 | 157220.15      | 616019.58      | 1911529.40      | 6636862.65      | 0.87 | 11.28    | 31.56     | 78.23     | 224.85     |
| 0.47 | 127230.44      | 493114.33      | 1539087.52      | 5388018.70      | 0.88 | 8.40     | 22.40     | 54.27     | 147.17     |
| 0.48 | 101965.43      | 392680.05      | 1236461.66      | 4343484.16      | 0.89 | 6.14     | 15.85     | 37.09     | 99.58      |
| 0.49 | 81006.15       | 313106.01      | 981083.54       | 3440978.41      | 0.90 | 4.47     | 10.95     | 24.74     | 66.25      |
| 0.50 | 65494.16       | 252405.13      | 774762.09       | 2744307.33      |      |          |           |           |            |

Table S333: Critical values for detector  $\hat{H}_{mov,sn}^{m,0.2}$  with windows size  $n = 0.2$ , and IM-OLS estimation in a model with intercept. The number of integrated regressors is 1 and the highest power of  $x_{kt}$  is 3.

| m    | 90 %          | 95 %          | 97,5 %         | 99 %           | m    | 90 %    | 95 %     | 97,5 %   | 99 %      |
|------|---------------|---------------|----------------|----------------|------|---------|----------|----------|-----------|
| 0.10 | 1603719546.37 | 5869132153.07 | 16959980850.10 | 57260559184.84 | 0.51 | 4856.50 | 17188.99 | 49478.65 | 150781.86 |
| 0.11 | 845059169.25  | 3180418514.79 | 9199929323.57  | 30117338014.01 | 0.52 | 3975.19 | 14169.83 | 40528.18 | 120616.86 |
| 0.12 | 470772377.71  | 1765415907.57 | 5360791197.67  | 17397904896.45 | 0.53 | 3281.97 | 11544.90 | 33017.09 | 100111.65 |
| 0.13 | 278172751.85  | 1042489845.27 | 3200462166.31  | 10446612680.80 | 0.54 | 2682.35 | 9615.06  | 27272.88 | 80572.84  |
| 0.14 | 164837111.11  | 619827841.62  | 1939246713.96  | 6554439151.21  | 0.55 | 2154.51 | 7600.50  | 21543.96 | 64567.20  |
| 0.15 | 104362712.61  | 382702754.93  | 1139739319.13  | 3984581691.71  | 0.56 | 1749.18 | 6162.67  | 17464.12 | 54163.85  |
| 0.16 | 66541406.09   | 235585786.54  | 718125338.86   | 2415661910.01  | 0.57 | 1378.53 | 4830.02  | 13797.19 | 42759.11  |
| 0.17 | 44610256.76   | 162426104.35  | 463908856.09   | 1494319781.64  | 0.58 | 1120.32 | 3892.99  | 11204.07 | 34581.74  |
| 0.18 | 30133040.77   | 109718429.41  | 316904031.21   | 1061657668.74  | 0.59 | 898.72  | 3138.21  | 8904.47  | 27656.56  |
| 0.19 | 20177949.02   | 74400411.12   | 216893013.00   | 703665088.44   | 0.60 | 724.52  | 2554.67  | 7040.30  | 22109.98  |
| 0.20 | 13978472.82   | 51050426.97   | 149410696.09   | 488754178.68   | 0.61 | 586.95  | 2091.90  | 5781.07  | 17595.68  |
| 0.21 | 9679664.78    | 35393706.47   | 105404487.14   | 346385582.55   | 0.62 | 477.25  | 1632.44  | 4588.76  | 13780.89  |
| 0.22 | 7077254.98    | 25250903.52   | 75361471.04    | 250741969.27   | 0.63 | 384.77  | 1306.73  | 3695.30  | 10935.43  |
| 0.23 | 5061507.43    | 18448942.03   | 54869013.18    | 175840474.70   | 0.64 | 309.78  | 1040.57  | 2912.28  | 8694.94   |
| 0.24 | 3673864.06    | 13403591.38   | 38979292.16    | 125955900.88   | 0.65 | 248.88  | 849.08   | 2317.86  | 6601.40   |
| 0.25 | 2666472.78    | 9603104.31    | 28011955.05    | 97139250.38    | 0.66 | 202.34  | 673.00   | 1809.45  | 5197.12   |
| 0.26 | 1976124.09    | 7105272.91    | 20129478.41    | 69056628.12    | 0.67 | 160.97  | 537.24   | 1434.49  | 4147.28   |
| 0.27 | 1487217.86    | 5349306.70    | 15564182.91    | 49752633.86    | 0.68 | 131.84  | 427.19   | 1127.40  | 3252.38   |
| 0.28 | 1099682.55    | 4028758.35    | 11416366.05    | 35966624.94    | 0.69 | 104.00  | 338.16   | 888.64   | 2580.81   |
| 0.29 | 830969.59     | 2975956.46    | 8643166.65     | 27698241.86    | 0.70 | 83.92   | 262.53   | 681.28   | 2021.97   |
| 0.30 | 639023.97     | 2264292.23    | 6519712.29     | 20900529.15    | 0.71 | 66.25   | 213.93   | 535.64   | 1619.61   |
| 0.31 | 490460.93     | 1732733.99    | 5060888.64     | 16281036.57    | 0.72 | 53.82   | 165.59   | 426.40   | 1254.89   |
| 0.32 | 375384.68     | 1361256.30    | 3910425.27     | 12542117.13    | 0.73 | 42.92   | 129.15   | 329.52   | 930.95    |
| 0.33 | 293408.86     | 1047535.15    | 3006101.16     | 9856576.55     | 0.74 | 34.13   | 101.24   | 259.04   | 737.38    |
| 0.34 | 223808.60     | 820545.45     | 2421062.59     | 7584455.37     | 0.75 | 27.06   | 78.71    | 204.14   | 573.23    |
| 0.35 | 176793.15     | 646166.76     | 1840478.65     | 6086097.94     | 0.76 | 21.53   | 63.01    | 155.84   | 427.87    |
| 0.36 | 140056.16     | 504599.37     | 1468900.37     | 4678582.04     | 0.77 | 16.98   | 49.60    | 117.25   | 325.94    |
| 0.37 | 110254.59     | 398407.57     | 1128151.17     | 3547588.81     | 0.78 | 13.33   | 38.03    | 91.83    | 242.70    |
| 0.38 | 87077.73      | 315144.38     | 918070.94      | 2879670.91     | 0.79 | 10.64   | 29.67    | 69.12    | 189.29    |
| 0.39 | 67773.52      | 243527.89     | 709295.92      | 2272849.68     | 0.80 | 8.46    | 22.93    | 54.73    | 139.94    |
| 0.40 | 53901.49      | 195643.70     | 552525.87      | 1794642.15     | 0.81 | 6.59    | 17.36    | 40.09    | 102.00    |
| 0.41 | 42647.66      | 154867.89     | 447567.77      | 1416109.10     | 0.82 | 5.27    | 13.01    | 30.53    | 78.46     |
| 0.42 | 34096.30      | 125259.86     | 358144.62      | 1125262.00     | 0.83 | 4.11    | 9.93     | 22.55    | 58.25     |
| 0.43 | 27520.92      | 99166.25      | 285616.38      | 895420.79      | 0.84 | 3.24    | 7.42     | 16.73    | 42.86     |
| 0.44 | 22095.02      | 79062.90      | 223142.42      | 703534.75      | 0.85 | 2.53    | 5.70     | 12.51    | 30.41     |
| 0.45 | 17768.20      | 64549.11      | 180857.38      | 548123.33      | 0.86 | 2.00    | 4.24     | 8.87     | 21.85     |
| 0.46 | 14185.95      | 51765.73      | 146580.32      | 448323.53      | 0.87 | 1.57    | 3.16     | 6.49     | 15.30     |
| 0.47 | 11438.43      | 41765.41      | 120151.44      | 348397.50      | 0.88 | 1.26    | 2.32     | 4.53     | 10.35     |
| 0.48 | 9168.44       | 33281.82      | 91250.55       | 279811.89      | 0.89 | 1.09    | 1.75     | 3.25     | 7.05      |
| 0.49 | 7588.20       | 26967.89      | 76219.79       | 218959.67      | 0.90 | 0.97    | 1.32     | 2.27     | 4.88      |
| 0.50 | 6103.57       | 21596.02      | 62461.91       | 184846.27      |      |         |          |          |           |

Table S334: Critical values for detector  $\hat{H}_{mov,sn}^{m,0.3}$  with windows size  $n = 0.3$ , and FM-OLS and D-OLS estimation in a model with intercept. The number of integrated regressors is 1 and the highest power of  $x_{kt}$  is 3.

| m    | 90 %           | 95 %           | 97.5 %          | 99 %            | m    | 90 %     | 95 %      | 97.5 %    | 99 %       |
|------|----------------|----------------|-----------------|-----------------|------|----------|-----------|-----------|------------|
| 0.10 | 20392831482.62 | 82950315942.67 | 267558425294.74 | 993001365268.96 | 0.51 | 57501.18 | 216446.68 | 663756.11 | 2389732.35 |
| 0.11 | 10909929592.68 | 44311292560.63 | 142153464743.21 | 522938120485.73 | 0.52 | 46563.28 | 175515.07 | 545340.86 | 1968204.51 |
| 0.12 | 6205870274.10  | 25155437515.20 | 78706187588.52  | 276529291477.28 | 0.53 | 37258.40 | 142106.84 | 435133.68 | 1596571.11 |
| 0.13 | 3591242452.07  | 14532539240.00 | 46702385038.06  | 165565537941.11 | 0.54 | 30173.00 | 116417.58 | 354738.66 | 1302137.32 |
| 0.14 | 2152526464.97  | 8829316099.68  | 28490528748.70  | 98156445552.21  | 0.55 | 24561.05 | 93740.37  | 284617.62 | 1017239.25 |
| 0.15 | 1377681871.98  | 5537048363.16  | 17505711840.34  | 63894515911.56  | 0.56 | 19952.48 | 75175.23  | 232038.31 | 787744.92  |
| 0.16 | 872301446.34   | 3451349334.71  | 11051122352.20  | 39403121166.07  | 0.57 | 15965.61 | 61066.01  | 187722.61 | 625395.38  |
| 0.17 | 558641272.85   | 2256916599.31  | 7431125333.91   | 26358829313.11  | 0.58 | 13039.23 | 49504.77  | 150154.28 | 497264.47  |
| 0.18 | 374786302.19   | 1522848893.44  | 4923700476.73   | 18287450696.39  | 0.59 | 10307.32 | 39443.42  | 120483.62 | 416480.71  |
| 0.19 | 258294289.73   | 1008574742.03  | 3306647524.95   | 12314167275.22  | 0.60 | 8417.70  | 31445.96  | 97253.75  | 326884.96  |
| 0.20 | 174254487.97   | 702762216.64   | 2209513769.05   | 8584168959.76   | 0.61 | 6702.11  | 24931.98  | 76510.95  | 264419.43  |
| 0.21 | 121897890.77   | 492167985.78   | 1578967089.05   | 5835836287.92   | 0.62 | 5496.05  | 20253.36  | 61747.51  | 207317.06  |
| 0.22 | 88321288.61    | 355420285.54   | 1103939906.75   | 4212501071.82   | 0.63 | 4456.26  | 16105.60  | 48156.37  | 166607.69  |
| 0.23 | 64445778.39    | 257610396.19   | 817198202.84    | 3020853523.81   | 0.64 | 3511.82  | 12757.37  | 38355.05  | 127888.48  |
| 0.24 | 46930393.65    | 184839565.05   | 577668491.33    | 2118352633.81   | 0.65 | 2833.97  | 10246.08  | 29848.64  | 100694.30  |
| 0.25 | 33943091.07    | 133915550.13   | 417892364.22    | 1536671018.59   | 0.66 | 2274.05  | 8164.20   | 23487.80  | 80575.12   |
| 0.26 | 25017410.27    | 99846843.58    | 308623712.40    | 1082456341.61   | 0.67 | 1800.30  | 6447.98   | 18517.98  | 61413.04   |
| 0.27 | 18220988.56    | 73841813.92    | 231612443.96    | 816658980.26    | 0.68 | 1450.70  | 5257.01   | 14645.20  | 48024.98   |
| 0.28 | 13835760.61    | 53907178.44    | 173008313.86    | 604104374.47    | 0.69 | 1164.40  | 4205.83   | 11673.06  | 37016.52   |
| 0.29 | 10312889.77    | 40546092.73    | 127946736.43    | 447042185.30    | 0.70 | 932.11   | 3292.19   | 9253.29   | 29210.12   |
| 0.30 | 7721156.10     | 30686026.74    | 97657659.96     | 333592526.42    | 0.71 | 731.00   | 2584.72   | 7400.30   | 22849.26   |
| 0.31 | 5975450.80     | 24200002.51    | 76670561.63     | 266898810.50    | 0.72 | 581.27   | 2032.21   | 5749.33   | 17776.96   |
| 0.32 | 4671817.70     | 18732722.13    | 59714510.71     | 207527104.78    | 0.73 | 458.02   | 1581.11   | 4576.49   | 14253.70   |
| 0.33 | 3596848.50     | 14672771.76    | 45632448.27     | 166017907.52    | 0.74 | 364.10   | 1253.05   | 3481.26   | 11151.44   |
| 0.34 | 2763319.38     | 11361701.51    | 35340532.91     | 124935807.76    | 0.75 | 287.12   | 986.28    | 2677.34   | 8330.57    |
| 0.35 | 2170284.08     | 8883663.86     | 27514081.53     | 97843767.74     | 0.76 | 225.95   | 751.39    | 2044.96   | 6334.58    |
| 0.36 | 1710893.15     | 6986940.40     | 21942995.15     | 76808628.64     | 0.77 | 174.50   | 578.19    | 1574.98   | 4891.38    |
| 0.37 | 1340484.00     | 5469106.56     | 16703917.35     | 61002669.89     | 0.78 | 135.04   | 446.68    | 1212.02   | 3692.36    |
| 0.38 | 1054139.24     | 4331271.25     | 13371921.24     | 48216848.50     | 0.79 | 104.21   | 343.54    | 929.12    | 2738.17    |
| 0.39 | 841444.93      | 3438665.63     | 10789589.25     | 38119526.06     | 0.80 | 78.89    | 262.45    | 706.37    | 2085.12    |
| 0.40 | 666339.61      | 2682440.41     | 8415141.05      | 30193470.77     | 0.81 | 61.44    | 198.96    | 530.50    | 1571.12    |
| 0.41 | 528624.59      | 2106307.50     | 6643268.14      | 23986672.94     | 0.82 | 47.41    | 151.77    | 406.18    | 1188.90    |
| 0.42 | 418918.99      | 1667189.40     | 5260956.60      | 18611616.89     | 0.83 | 36.20    | 112.39    | 297.73    | 880.15     |
| 0.43 | 335531.81      | 1315973.67     | 4141044.35      | 14568564.87     | 0.84 | 27.46    | 83.21     | 219.46    | 645.22     |
| 0.44 | 264451.24      | 1037633.19     | 3325414.93      | 11522216.94     | 0.85 | 20.33    | 60.82     | 156.72    | 459.91     |
| 0.45 | 213431.29      | 835414.56      | 2629161.87      | 9101495.04      | 0.86 | 15.33    | 44.18     | 112.49    | 322.42     |
| 0.46 | 170448.94      | 669451.51      | 2071858.36      | 7165842.54      | 0.87 | 11.39    | 31.68     | 78.34     | 224.95     |
| 0.47 | 137726.06      | 531170.34      | 1650513.59      | 5775223.23      | 0.88 | 8.50     | 22.52     | 54.34     | 147.38     |
| 0.48 | 110294.16      | 423211.94      | 1320660.73      | 4605588.37      | 0.89 | 6.26     | 15.95     | 37.18     | 99.64      |
| 0.49 | 87645.56       | 335506.07      | 1039790.41      | 3681483.26      | 0.90 | 4.58     | 11.03     | 24.82     | 66.32      |
| 0.50 | 70523.51       | 269776.04      | 823631.44       | 2940198.94      |      |          |           |           |            |

Table S335: Critical values for detector  $\hat{H}_{mov,sn}^{m,0.3}$  with windows size  $n = 0.3$ , and IM-OLS estimation in a model with intercept. The number of integrated regressors is 1 and the highest power of  $x_{kt}$  is 3.



| m    | 90 %          | 95 %           | 97,5 %         | 99 %           | m    | 90 %    | 95 %     | 97,5 %   | 99 %      |
|------|---------------|----------------|----------------|----------------|------|---------|----------|----------|-----------|
| 0.10 | 3003473244.56 | 10146042982.00 | 27917754931.49 | 87529805346.90 | 0.51 | 7119.51 | 24176.78 | 67315.53 | 217174.19 |
| 0.11 | 1564864737.58 | 5410488973.40  | 14729083547.23 | 46243581143.03 | 0.52 | 5784.43 | 19852.38 | 56037.19 | 171525.06 |
| 0.12 | 871514546.77  | 3006882963.56  | 8413725921.85  | 25811247935.29 | 0.53 | 4730.70 | 16449.13 | 45163.00 | 139330.87 |
| 0.13 | 497669126.81  | 1726786857.16  | 4934878085.14  | 15144194125.71 | 0.54 | 3931.13 | 13822.98 | 37188.85 | 114766.01 |
| 0.14 | 294808287.66  | 998641571.85   | 2935417245.34  | 9226522142.19  | 0.55 | 3174.27 | 10998.67 | 29637.50 | 94070.64  |
| 0.15 | 182045125.63  | 606593889.16   | 1735431150.67  | 5744026766.41  | 0.56 | 2583.93 | 8904.52  | 24463.76 | 78283.16  |
| 0.16 | 113746440.54  | 383279054.11   | 1058907607.35  | 3555898498.70  | 0.57 | 2069.78 | 7244.26  | 19771.39 | 58845.92  |
| 0.17 | 74750398.65   | 251203192.26   | 680189193.78   | 2209401195.36  | 0.58 | 1678.54 | 5712.19  | 16017.73 | 49376.73  |
| 0.18 | 48964041.08   | 164977197.79   | 456963746.73   | 1494390231.35  | 0.59 | 1364.66 | 4530.65  | 12735.59 | 40211.25  |
| 0.19 | 32949610.47   | 111876889.94   | 308943435.09   | 1014089796.47  | 0.60 | 1100.01 | 3678.02  | 10427.92 | 32242.92  |
| 0.20 | 22562141.25   | 76402835.08    | 211979024.01   | 670568525.18   | 0.61 | 912.69  | 3101.20  | 8350.19  | 26008.16  |
| 0.21 | 15565762.22   | 53546167.13    | 150796411.75   | 476669887.94   | 0.62 | 719.90  | 2465.93  | 6852.25  | 20524.30  |
| 0.22 | 10821631.94   | 37517463.52    | 107334555.37   | 326272471.58   | 0.63 | 593.78  | 1982.14  | 5507.51  | 16829.73  |
| 0.23 | 7808052.24    | 27009465.34    | 76582202.80    | 237385249.21   | 0.64 | 483.51  | 1606.07  | 4451.90  | 13347.39  |
| 0.24 | 5613748.60    | 19122887.47    | 54086183.01    | 170438313.87   | 0.65 | 397.45  | 1277.30  | 3490.84  | 10319.07  |
| 0.25 | 3974559.30    | 13933004.06    | 38696435.83    | 123605487.43   | 0.66 | 325.79  | 1054.94  | 2784.29  | 7985.25   |
| 0.26 | 2953409.02    | 10197335.47    | 28720204.46    | 87796320.62    | 0.67 | 262.00  | 829.17   | 2272.63  | 6479.93   |
| 0.27 | 2222846.38    | 7563915.82     | 21283204.35    | 65491871.60    | 0.68 | 214.98  | 665.06   | 1757.03  | 5157.10   |
| 0.28 | 1652102.82    | 5582541.59     | 15837232.23    | 47279437.24    | 0.69 | 172.16  | 534.76   | 1392.00  | 4153.68   |
| 0.29 | 1231555.66    | 4159633.80     | 11732704.89    | 36459375.82    | 0.70 | 138.77  | 425.54   | 1107.86  | 3285.52   |
| 0.30 | 935680.80     | 3213297.46     | 8793758.86     | 27751979.25    | 0.71 | 113.42  | 343.62   | 867.79   | 2642.61   |
| 0.31 | 712442.12     | 2460099.49     | 6713729.51     | 21334601.49    | 0.72 | 91.19   | 275.32   | 687.32   | 2087.58   |
| 0.32 | 549919.61     | 1922469.16     | 5175479.01     | 16335163.05    | 0.73 | 74.26   | 216.22   | 532.95   | 1597.49   |
| 0.33 | 421076.20     | 1499323.83     | 4011770.58     | 12521513.36    | 0.74 | 60.17   | 173.15   | 428.41   | 1230.82   |
| 0.34 | 327422.61     | 1159358.67     | 3157337.45     | 10110817.73    | 0.75 | 48.65   | 138.99   | 338.43   | 937.35    |
| 0.35 | 253554.28     | 904874.95      | 2495216.18     | 7988752.09     | 0.76 | 39.43   | 106.30   | 267.21   | 717.15    |
| 0.36 | 202031.72     | 705539.29      | 1992446.11     | 6270213.53     | 0.77 | 31.75   | 84.24    | 206.66   | 550.50    |
| 0.37 | 156999.43     | 543650.85      | 1545568.89     | 4672842.03     | 0.78 | 25.53   | 66.38    | 154.92   | 420.54    |
| 0.38 | 122377.35     | 431971.86      | 1236760.32     | 3796409.14     | 0.79 | 20.16   | 51.83    | 122.49   | 323.73    |
| 0.39 | 96036.87      | 338463.70      | 953097.90      | 2990695.53     | 0.80 | 16.34   | 40.46    | 94.37    | 246.55    |
| 0.40 | 76525.83      | 262596.07      | 750108.50      | 2315632.93     | 0.81 | 12.88   | 31.08    | 70.34    | 191.15    |
| 0.41 | 60451.02      | 214895.53      | 591063.21      | 1853897.90     | 0.82 | 10.25   | 23.81    | 53.21    | 140.38    |
| 0.42 | 47774.30      | 170422.72      | 473601.00      | 1440553.94     | 0.83 | 8.00    | 18.05    | 39.43    | 101.30    |
| 0.43 | 39148.90      | 134355.97      | 381614.91      | 1115448.04     | 0.84 | 6.25    | 13.62    | 29.88    | 73.07     |
| 0.44 | 31395.74      | 109226.95      | 302864.18      | 925380.55      | 0.85 | 4.88    | 10.26    | 21.93    | 52.45     |
| 0.45 | 25617.74      | 88585.28       | 245180.28      | 767732.78      | 0.86 | 3.72    | 7.73     | 16.06    | 39.22     |
| 0.46 | 20488.03      | 71060.64       | 200759.76      | 604675.57      | 0.87 | 2.87    | 5.72     | 11.51    | 26.73     |
| 0.47 | 16394.17      | 57628.99       | 159733.34      | 487489.93      | 0.88 | 2.11    | 4.11     | 7.95     | 18.11     |
| 0.48 | 13349.51      | 45749.55       | 125652.28      | 391778.12      | 0.89 | 1.59    | 2.96     | 5.62     | 12.25     |
| 0.49 | 10902.93      | 37203.61       | 102728.10      | 315943.85      | 0.90 | 1.16    | 2.09     | 3.75     | 8.17      |
| 0.50 | 8757.07       | 30271.00       | 85176.89       | 264638.61      |      |         |          |          |           |

Table S336: Critical values for detector  $\hat{H}_{mov,sn}^{m,0.1}$  with windows size  $n = 0.1$ , and FM-OLS and D-OLS estimation in a model with intercept and linear trend. The number of integrated regressors is 1 and the highest power of  $x_{kt}$  is 3.

| m    | 90 %           | 95 %           | 97.5 %          | 99 %            | m    | 90 %     | 95 %      | 97.5 %    | 99 %       |
|------|----------------|----------------|-----------------|-----------------|------|----------|-----------|-----------|------------|
| 0.10 | 21869136442.21 | 80141371386.50 | 241232044471.99 | 803462524495.07 | 0.51 | 45849.86 | 175116.53 | 531090.34 | 1798221.99 |
| 0.11 | 11438209182.98 | 41818271626.79 | 128285896866.26 | 433682868493.15 | 0.52 | 37527.33 | 141272.22 | 416425.34 | 1487431.24 |
| 0.12 | 6376185874.41  | 22601465059.86 | 69606522307.30  | 242582756427.31 | 0.53 | 30205.93 | 114788.04 | 337319.61 | 1204777.76 |
| 0.13 | 3594322672.79  | 13258212169.77 | 39526617137.34  | 132624200919.36 | 0.54 | 24484.58 | 92109.85  | 276367.32 | 976914.30  |
| 0.14 | 2102910032.94  | 7791497558.11  | 23968855430.06  | 79740879493.91  | 0.55 | 19820.46 | 75158.27  | 227776.98 | 799791.30  |
| 0.15 | 1294884107.63  | 4814617942.16  | 14579805379.65  | 49675797824.12  | 0.56 | 16350.76 | 61566.82  | 190604.20 | 633486.77  |
| 0.16 | 807518246.55   | 2994858601.62  | 8929400439.79   | 31083308466.89  | 0.57 | 13362.19 | 50092.42  | 151587.64 | 515564.84  |
| 0.17 | 520046057.48   | 1946675909.00  | 5825238949.68   | 19878004578.72  | 0.58 | 10956.57 | 39785.43  | 123346.95 | 418896.08  |
| 0.18 | 346330798.18   | 1280833376.48  | 3848749434.92   | 13539482802.63  | 0.59 | 8638.63  | 31623.21  | 97380.37  | 327098.87  |
| 0.19 | 233424460.32   | 857694036.66   | 2564772741.94   | 9086516448.61   | 0.60 | 6963.77  | 25347.88  | 77338.07  | 265458.06  |
| 0.20 | 156915573.94   | 586339652.12   | 1765255284.30   | 6321168845.82   | 0.61 | 5643.69  | 20653.91  | 62588.80  | 213299.10  |
| 0.21 | 108167810.80   | 402960411.43   | 1234498736.93   | 4442403368.26   | 0.62 | 4665.49  | 16953.21  | 49575.16  | 166852.88  |
| 0.22 | 75725901.06    | 283245687.62   | 873977985.91    | 3192191918.73   | 0.63 | 3864.88  | 13630.77  | 39323.01  | 131516.63  |
| 0.23 | 55544971.11    | 200888655.52   | 615025361.82    | 2126338584.00   | 0.64 | 3075.19  | 11046.10  | 32047.06  | 105874.33  |
| 0.24 | 39741610.03    | 142633867.85   | 431644155.78    | 1498757295.73   | 0.65 | 2496.38  | 8850.22   | 25790.77  | 81650.38   |
| 0.25 | 28443920.39    | 106121808.76   | 315652450.57    | 1049293405.53   | 0.66 | 2007.79  | 7048.25   | 20064.51  | 67003.06   |
| 0.26 | 20709421.42    | 77507544.05    | 229352401.25    | 764095614.39    | 0.67 | 1632.00  | 5626.51   | 16232.80  | 53028.61   |
| 0.27 | 15441898.49    | 56836917.68    | 165858434.05    | 567050412.60    | 0.68 | 1317.43  | 4555.21   | 12902.98  | 40560.20   |
| 0.28 | 11543774.59    | 42681928.20    | 123997392.26    | 411450668.01    | 0.69 | 1056.73  | 3679.13   | 10252.56  | 32711.45   |
| 0.29 | 8598515.12     | 31956885.76    | 93149290.90     | 307936855.73    | 0.70 | 853.30   | 2941.19   | 8203.84   | 27309.89   |
| 0.30 | 6405431.86     | 24247624.93    | 72202645.74     | 238319154.45    | 0.71 | 673.29   | 2344.46   | 6687.91   | 20911.63   |
| 0.31 | 4862110.45     | 18794728.63    | 56286768.11     | 179473528.89    | 0.72 | 542.24   | 1863.42   | 5277.73   | 16915.08   |
| 0.32 | 3767468.98     | 14567163.60    | 43522297.02     | 141016960.19    | 0.73 | 436.11   | 1480.93   | 4123.83   | 13398.97   |
| 0.33 | 2940669.05     | 11079150.87    | 33533257.05     | 115374961.23    | 0.74 | 347.82   | 1164.26   | 3188.79   | 10300.35   |
| 0.34 | 2296380.84     | 8604746.14     | 25939236.88     | 88241212.60     | 0.75 | 279.25   | 921.85    | 2564.61   | 7900.16    |
| 0.35 | 1774511.90     | 6677128.38     | 20446054.10     | 70271531.23     | 0.76 | 221.10   | 723.61    | 2017.90   | 6026.71    |
| 0.36 | 1403236.18     | 5227384.03     | 15852460.30     | 56122447.59     | 0.77 | 176.50   | 566.92    | 1569.99   | 4664.11    |
| 0.37 | 1077212.44     | 4101766.55     | 12485864.37     | 43886995.96     | 0.78 | 137.63   | 444.37    | 1178.89   | 3649.77    |
| 0.38 | 847095.50      | 3232593.58     | 10109918.18     | 35510740.06     | 0.79 | 108.89   | 343.14    | 908.58    | 2743.42    |
| 0.39 | 677495.74      | 2546403.36     | 7789266.60      | 28322833.35     | 0.80 | 85.78    | 260.16    | 693.33    | 2095.57    |
| 0.40 | 533099.80      | 1992257.32     | 6106039.21      | 22589184.79     | 0.81 | 66.92    | 197.06    | 539.50    | 1618.14    |
| 0.41 | 423077.71      | 1616865.35     | 4813041.77      | 17865425.09     | 0.82 | 51.70    | 151.62    | 398.84    | 1189.76    |
| 0.42 | 335701.37      | 1246857.61     | 3884409.77      | 13944392.11     | 0.83 | 39.81    | 115.82    | 296.47    | 887.13     |
| 0.43 | 266238.92      | 1006130.58     | 3093928.07      | 10679892.40     | 0.84 | 30.28    | 86.13     | 223.02    | 647.22     |
| 0.44 | 214747.21      | 799401.31      | 2460578.55      | 8483213.53      | 0.85 | 23.32    | 63.15     | 160.64    | 455.53     |
| 0.45 | 170613.80      | 641947.48      | 1962606.12      | 6936713.77      | 0.86 | 17.72    | 47.07     | 117.41    | 320.10     |
| 0.46 | 137055.91      | 517968.33      | 1552895.52      | 5597134.68      | 0.87 | 13.43    | 33.70     | 81.27     | 222.83     |
| 0.47 | 111387.50      | 410684.14      | 1268766.18      | 4353613.27      | 0.88 | 10.15    | 24.11     | 56.33     | 151.32     |
| 0.48 | 90124.02       | 332114.69      | 1007432.20      | 3532876.16      | 0.89 | 7.57     | 17.01     | 37.70     | 102.33     |
| 0.49 | 70802.46       | 267982.11      | 815601.69       | 2800156.23      | 0.90 | 5.58     | 11.87     | 25.39     | 65.73      |
| 0.50 | 56332.58       | 215661.78      | 659960.27       | 2294460.06      |      |          |           |           |            |

Table S337: Critical values for detector  $\hat{H}_{mov,sn}^{m,0.1}$  with windows size  $n = 0.1$ , and IM-OLS estimation in a model with intercept and linear trend. The number of integrated regressors is 1 and the highest power of  $x_{kt}$  is 3.

| m    | 90 %          | 95 %           | 97.5 %         | 99 %            | m    | 90 %    | 95 %     | 97.5 %   | 99 %      |
|------|---------------|----------------|----------------|-----------------|------|---------|----------|----------|-----------|
| 0.10 | 3923059681.41 | 13447758918.11 | 37979082265.69 | 118446118036.81 | 0.51 | 9257.32 | 31386.52 | 88530.48 | 280617.02 |
| 0.11 | 2066889011.28 | 7309153901.86  | 20102916996.28 | 64027147275.21  | 0.52 | 7485.19 | 26056.78 | 72500.05 | 221637.31 |
| 0.12 | 1152567075.49 | 4022356995.45  | 11536594458.18 | 35959134796.79  | 0.53 | 6165.67 | 21257.97 | 58308.82 | 180956.18 |
| 0.13 | 663702977.78  | 2325280902.84  | 6735565132.05  | 20834341413.02  | 0.54 | 5104.65 | 17956.74 | 47827.64 | 146873.71 |
| 0.14 | 391176318.89  | 1353663332.39  | 4061022315.67  | 12875197126.14  | 0.55 | 4115.88 | 14281.64 | 38407.84 | 119652.92 |
| 0.15 | 242003332.12  | 825816794.55   | 2391764592.39  | 7973063391.56   | 0.56 | 3335.55 | 11382.23 | 31082.19 | 98429.42  |
| 0.16 | 152752872.07  | 517403899.04   | 1463364090.53  | 4838274721.37   | 0.57 | 2653.29 | 9108.02  | 25171.19 | 74655.06  |
| 0.17 | 100762782.96  | 341835139.17   | 946198170.00   | 3072848105.65   | 0.58 | 2139.91 | 7242.82  | 20291.78 | 62045.52  |
| 0.18 | 65882647.56   | 226068277.26   | 628319164.56   | 2109006727.94   | 0.59 | 1736.33 | 5714.90  | 16189.83 | 50419.39  |
| 0.19 | 44524625.49   | 153249748.24   | 423512339.10   | 1416436236.45   | 0.60 | 1392.40 | 4635.80  | 13000.97 | 40308.05  |
| 0.20 | 30366666.88   | 104966488.81   | 296392050.13   | 927269698.77    | 0.61 | 1151.99 | 3879.94  | 10348.83 | 31709.92  |
| 0.21 | 20978993.16   | 73159814.05    | 208420160.15   | 668333494.50    | 0.62 | 906.16  | 3066.90  | 8397.35  | 25226.82  |
| 0.22 | 14632306.05   | 51578449.18    | 148038911.28   | 460728487.29    | 0.63 | 743.65  | 2446.61  | 6648.08  | 20316.07  |
| 0.23 | 10603468.65   | 37212633.98    | 104474834.73   | 330966264.07    | 0.64 | 599.86  | 1992.73  | 5356.55  | 16021.25  |
| 0.24 | 7595250.11    | 26408081.29    | 74653415.34    | 237940586.09    | 0.65 | 490.90  | 1567.33  | 4255.59  | 12422.37  |
| 0.25 | 5390365.55    | 19024846.02    | 53586779.72    | 173824307.31    | 0.66 | 398.20  | 1277.26  | 3340.33  | 9525.10   |
| 0.26 | 3980502.01    | 14034378.55    | 40069379.26    | 124136981.90    | 0.67 | 321.83  | 997.08   | 2721.22  | 7576.06   |
| 0.27 | 3015286.42    | 10436170.46    | 29596318.40    | 90374271.33     | 0.68 | 261.57  | 800.68   | 2103.37  | 5951.20   |
| 0.28 | 2226735.67    | 7684266.96     | 21729226.14    | 65963638.32     | 0.69 | 207.97  | 635.33   | 1653.01  | 4873.51   |
| 0.29 | 1670305.73    | 5753555.93     | 16171530.28    | 51041050.30     | 0.70 | 167.06  | 502.42   | 1292.24  | 3703.77   |
| 0.30 | 1266703.20    | 4388265.52     | 12282180.91    | 37940316.53     | 0.71 | 135.83  | 401.80   | 1006.73  | 2975.12   |
| 0.31 | 967491.11     | 3363800.35     | 9283128.33     | 29198043.24     | 0.72 | 107.32  | 318.76   | 793.52   | 2398.69   |
| 0.32 | 743148.29     | 2609311.96     | 7178801.88     | 22430834.93     | 0.73 | 86.71   | 248.57   | 606.39   | 1782.87   |
| 0.33 | 567955.36     | 2042027.35     | 5499883.77     | 17452979.94     | 0.74 | 69.61   | 196.67   | 481.78   | 1362.00   |
| 0.34 | 442700.71     | 1576295.33     | 4339635.05     | 13822250.00     | 0.75 | 55.98   | 156.05   | 376.33   | 1037.21   |
| 0.35 | 341834.20     | 1214877.70     | 3386959.15     | 11199632.78     | 0.76 | 45.22   | 118.83   | 293.43   | 773.47    |
| 0.36 | 270005.66     | 960834.55      | 2717382.53     | 8652667.82      | 0.77 | 36.08   | 93.16    | 224.58   | 607.62    |
| 0.37 | 211060.42     | 733600.34      | 2110549.22     | 6393071.40      | 0.78 | 28.70   | 72.46    | 166.88   | 446.42    |
| 0.38 | 162973.54     | 582676.25      | 1678501.45     | 5244607.18      | 0.79 | 22.43   | 56.01    | 130.82   | 343.86    |
| 0.39 | 128718.77     | 455744.11      | 1294047.90     | 4121498.05      | 0.80 | 17.90   | 43.41    | 99.90    | 257.21    |
| 0.40 | 102482.44     | 355743.92      | 1011597.04     | 3186967.93      | 0.81 | 13.93   | 32.90    | 73.28    | 198.12    |
| 0.41 | 80959.29      | 289248.94      | 798699.15      | 2537762.99      | 0.82 | 11.03   | 25.18    | 55.11    | 142.84    |
| 0.42 | 63868.13      | 226664.40      | 636884.55      | 1959007.64      | 0.83 | 8.48    | 18.87    | 40.72    | 104.03    |
| 0.43 | 52253.24      | 179766.58      | 511945.86      | 1524721.51      | 0.84 | 6.59    | 14.07    | 30.68    | 74.49     |
| 0.44 | 41639.92      | 144973.78      | 404527.31      | 1236140.84      | 0.85 | 5.11    | 10.57    | 22.32    | 53.25     |
| 0.45 | 33759.05      | 117609.43      | 331628.11      | 1027452.65      | 0.86 | 3.86    | 7.90     | 16.30    | 39.57     |
| 0.46 | 26799.00      | 94938.15       | 269061.88      | 791503.80       | 0.87 | 2.97    | 5.83     | 11.61    | 26.90     |
| 0.47 | 21679.75      | 76136.29       | 214411.33      | 653840.66       | 0.88 | 2.19    | 4.19     | 8.05     | 18.22     |
| 0.48 | 17668.39      | 59927.54       | 166995.32      | 521794.85       | 0.89 | 1.67    | 3.05     | 5.67     | 12.32     |
| 0.49 | 14343.99      | 48757.91       | 135340.12      | 409555.84       | 0.90 | 1.25    | 2.18     | 3.84     | 8.28      |
| 0.50 | 11477.62      | 39308.11       | 112727.66      | 345191.48       |      |         |          |          |           |

Table S338: Critical values for detector  $\hat{H}_{mov,sn}^{m,0.2}$  with windows size  $n = 0.2$ , and FM-OLS and D-OLS estimation in a model with intercept and linear trend. The number of integrated regressors is 1 and the highest power of  $x_{kt}$  is 3.

| m    | 90 %           | 95 %            | 97,5 %          | 99 %             | m    | 90 %     | 95 %      | 97,5 %    | 99 %       |
|------|----------------|-----------------|-----------------|------------------|------|----------|-----------|-----------|------------|
| 0.10 | 28598257573.74 | 106407221687.80 | 325652846224.59 | 1109783143878.03 | 0.51 | 59576.80 | 228586.28 | 694216.92 | 2368975.87 |
| 0.11 | 14988505754.69 | 56017571326.61  | 173793959510.05 | 587886715373.04  | 0.52 | 48627.07 | 183643.18 | 540700.29 | 1904819.03 |
| 0.12 | 8372710382.77  | 30525983044.54  | 95841200690.06  | 336368896815.66  | 0.53 | 38941.56 | 147632.12 | 430336.98 | 1569471.14 |
| 0.13 | 4757341437.79  | 17857949578.28  | 54190206978.92  | 185459528075.25  | 0.54 | 31549.49 | 119553.08 | 351704.32 | 1238836.88 |
| 0.14 | 2777405589.27  | 10541417376.42  | 32767153571.45  | 109176197070.99  | 0.55 | 25558.16 | 96508.09  | 295489.48 | 1009572.79 |
| 0.15 | 1728655509.33  | 6567764726.57   | 19906148671.71  | 67858815749.22   | 0.56 | 20912.52 | 78308.82  | 241630.49 | 789962.99  |
| 0.16 | 1072490867.60  | 4014958350.43   | 12349918069.01  | 43010510065.24   | 0.57 | 17050.83 | 63733.32  | 192308.02 | 659017.36  |
| 0.17 | 695316775.63   | 2636773980.05   | 7998317429.16   | 27707887114.39   | 0.58 | 13834.29 | 50531.86  | 153720.16 | 520664.93  |
| 0.18 | 463848101.38   | 1740356034.21   | 5339202324.49   | 18563535357.17   | 0.59 | 10932.03 | 40144.94  | 120752.99 | 414966.93  |
| 0.19 | 312881075.55   | 1166499275.40   | 3542385075.13   | 12724790280.17   | 0.60 | 8766.86  | 31913.34  | 96682.26  | 334080.64  |
| 0.20 | 211591495.82   | 805442610.93    | 2442799103.68   | 8860764970.52    | 0.61 | 7081.03  | 25942.88  | 76981.36  | 265428.46  |
| 0.21 | 145494881.80   | 551842018.71    | 1726121927.58   | 6230233371.39    | 0.62 | 5810.66  | 21033.84  | 60872.49  | 204303.80  |
| 0.22 | 102572166.00   | 383640174.93    | 1210795600.41   | 4446680396.10    | 0.63 | 4770.52  | 16906.58  | 48026.89  | 159322.90  |
| 0.23 | 74445281.70    | 275939667.39    | 855069100.87    | 2954676012.55    | 0.64 | 3767.32  | 13433.61  | 39058.58  | 125799.17  |
| 0.24 | 53551000.69    | 194733728.26    | 598231287.23    | 2114930251.56    | 0.65 | 3049.24  | 10875.53  | 31113.17  | 99265.56   |
| 0.25 | 38442004.94    | 144423211.98    | 437332731.91    | 1463631090.87    | 0.66 | 2459.82  | 8562.49   | 24198.81  | 79463.29   |
| 0.26 | 28303590.57    | 107821633.15    | 317770806.65    | 1073930183.50    | 0.67 | 1975.48  | 6752.08   | 19178.14  | 61825.50   |
| 0.27 | 20743495.96    | 77975205.56     | 230733932.95    | 783126671.11     | 0.68 | 1591.87  | 5420.27   | 15244.11  | 48209.52   |
| 0.28 | 15577324.47    | 57982125.69     | 171643543.43    | 569947483.99     | 0.69 | 1279.06  | 4370.26   | 11973.49  | 37611.81   |
| 0.29 | 11540682.55    | 43546485.11     | 129120639.96    | 424844249.57     | 0.70 | 1014.97  | 3446.76   | 9615.70   | 31156.70   |
| 0.30 | 8656577.18     | 33164260.94     | 99658588.50     | 334545026.95     | 0.71 | 793.89   | 2732.40   | 7654.59   | 23889.21   |
| 0.31 | 6550146.44     | 25777750.55     | 76652954.63     | 248222500.89     | 0.72 | 633.50   | 2147.53   | 5977.28   | 19135.89   |
| 0.32 | 5083945.98     | 19688802.76     | 60156128.95     | 193917925.25     | 0.73 | 506.24   | 1687.40   | 4678.81   | 14760.22   |
| 0.33 | 3973962.65     | 15037702.62     | 45718964.14     | 162360673.39     | 0.74 | 403.18   | 1327.62   | 3549.30   | 11383.47   |
| 0.34 | 3107874.26     | 11675139.00     | 35100412.25     | 120262721.52     | 0.75 | 318.69   | 1030.51   | 2837.85   | 8565.09    |
| 0.35 | 2376199.41     | 9166142.46      | 27826733.62     | 96769352.64      | 0.76 | 252.16   | 812.84    | 2227.15   | 6512.18    |
| 0.36 | 1882488.28     | 7123418.48      | 21396717.54     | 76727749.84      | 0.77 | 197.84   | 629.25    | 1707.39   | 5006.29    |
| 0.37 | 1446531.01     | 5513706.59      | 16883652.29     | 61012396.41      | 0.78 | 153.41   | 488.73    | 1277.89   | 3892.40    |
| 0.38 | 1138862.37     | 4401498.81      | 13579857.41     | 48504202.40      | 0.79 | 120.85   | 372.03    | 978.76    | 2898.52    |
| 0.39 | 900718.53      | 3425708.34      | 10438662.70     | 38325021.95      | 0.80 | 93.89    | 278.03    | 739.63    | 2194.83    |
| 0.40 | 713275.87      | 2675607.04      | 8313355.10      | 30698169.51      | 0.81 | 72.50    | 209.46    | 567.84    | 1660.11    |
| 0.41 | 563695.58      | 2156660.33      | 6495419.07      | 24068121.04      | 0.82 | 55.61    | 160.04    | 412.72    | 1230.58    |
| 0.42 | 445600.88      | 1664903.09      | 5240783.91      | 18948093.83      | 0.83 | 42.45    | 121.03    | 307.92    | 906.42     |
| 0.43 | 352803.36      | 1347713.84      | 4184365.48      | 14452592.42      | 0.84 | 31.87    | 89.38     | 228.72    | 663.37     |
| 0.44 | 283817.64      | 1073632.92      | 3259156.01      | 11375608.37      | 0.85 | 24.52    | 64.86     | 164.04    | 460.77     |
| 0.45 | 225667.76      | 851531.91       | 2588810.27      | 9377537.77       | 0.86 | 18.41    | 48.03     | 119.01    | 323.39     |
| 0.46 | 180932.13      | 680059.58       | 2057218.60      | 7524402.92       | 0.87 | 13.87    | 34.32     | 81.77     | 223.79     |
| 0.47 | 145967.53      | 539859.68       | 1674734.28      | 5824065.60       | 0.88 | 10.41    | 24.37     | 56.74     | 151.92     |
| 0.48 | 118559.49      | 436736.73       | 1316880.86      | 4674368.56       | 0.89 | 7.74     | 17.17     | 37.92     | 102.53     |
| 0.49 | 92786.24       | 350508.42       | 1068886.78      | 3668609.25       | 0.90 | 5.69     | 11.99     | 25.47     | 65.88      |
| 0.50 | 73461.84       | 285917.52       | 853900.64       | 2994580.04       |      |          |           |           |            |

Table S339: Critical values for detector  $\hat{H}_{mov,sn}^{m,0.2}$  with windows size  $n = 0.2$ , and IM-OLS estimation in a model with intercept and linear trend. The number of integrated regressors is 1 and the highest power of  $x_{kt}$  is 3.

| m    | 90 %          | 95 %           | 97,5 %         | 99 %            | m    | 90 %    | 95 %     | 97,5 %   | 99 %      |
|------|---------------|----------------|----------------|-----------------|------|---------|----------|----------|-----------|
| 0.10 | 4223721544.31 | 14754373994.86 | 41232677264.31 | 131989650355.42 | 0.51 | 9818.52 | 32955.01 | 93333.45 | 292224.30 |
| 0.11 | 2235514565.67 | 7966118127.88  | 22096060400.54 | 70694335920.75  | 0.52 | 7885.49 | 27495.33 | 76340.86 | 231143.05 |
| 0.12 | 1240450052.70 | 4358599648.89  | 12524835044.16 | 39528022938.61  | 0.53 | 6543.72 | 22376.13 | 61469.85 | 186423.54 |
| 0.13 | 716198994.44  | 2513048520.72  | 7320874186.03  | 22805333563.62  | 0.54 | 5380.47 | 18777.79 | 50522.80 | 154610.44 |
| 0.14 | 422905935.80  | 1460598999.66  | 4429465881.32  | 14140625104.37  | 0.55 | 4304.19 | 14943.55 | 40145.28 | 124309.55 |
| 0.15 | 261442199.84  | 898383229.60   | 2594262372.55  | 8744798503.18   | 0.56 | 3515.44 | 11871.30 | 32497.46 | 102310.02 |
| 0.16 | 165213057.61  | 564481709.20   | 1602711374.03  | 5293211255.17   | 0.57 | 2771.21 | 9453.38  | 26101.27 | 77201.37  |
| 0.17 | 108851783.73  | 373431473.73   | 1032644407.85  | 3394560516.10   | 0.58 | 2234.21 | 7536.71  | 20924.22 | 64129.62  |
| 0.18 | 71303351.88   | 247393405.66   | 684308102.68   | 2315513407.40   | 0.59 | 1808.18 | 5934.69  | 16818.42 | 51783.64  |
| 0.19 | 48116915.59   | 166662997.32   | 465443213.65   | 1569038400.74   | 0.60 | 1453.43 | 4792.72  | 13367.64 | 41577.22  |
| 0.20 | 32829879.73   | 114351038.46   | 323448529.95   | 1014520264.52   | 0.61 | 1190.65 | 3983.08  | 10656.20 | 32370.54  |
| 0.21 | 22675718.91   | 79854688.93    | 227101384.37   | 728567712.28    | 0.62 | 936.82  | 3147.73  | 8664.45  | 25937.28  |
| 0.22 | 15818709.05   | 56578734.73    | 161002497.36   | 511935161.53    | 0.63 | 768.68  | 2508.98  | 6772.18  | 20744.96  |
| 0.23 | 11521851.09   | 40604258.21    | 113616326.38   | 359407617.26    | 0.64 | 616.06  | 2051.66  | 5453.49  | 16347.90  |
| 0.24 | 8211224.67    | 28712673.57    | 81702703.57    | 257340984.38    | 0.65 | 504.23  | 1604.41  | 4330.84  | 12576.18  |
| 0.25 | 5822697.67    | 20570023.24    | 58468845.54    | 188750519.07    | 0.66 | 408.27  | 1302.01  | 3381.74  | 9707.28   |
| 0.26 | 4290627.69    | 15243766.79    | 43358118.67    | 135968903.91    | 0.67 | 328.07  | 1014.38  | 2762.60  | 7658.06   |
| 0.27 | 3266752.04    | 11327083.80    | 32312060.53    | 97842114.73     | 0.68 | 267.65  | 812.47   | 2126.60  | 5987.10   |
| 0.28 | 2403754.66    | 8407028.43     | 23587320.05    | 72024216.05     | 0.69 | 211.49  | 642.33   | 1670.19  | 4912.15   |
| 0.29 | 1807848.62    | 6252388.52     | 17602967.53    | 55554423.66     | 0.70 | 169.74  | 507.89   | 1304.65  | 3709.87   |
| 0.30 | 1371340.27    | 4745771.56     | 13392557.80    | 41547851.52     | 0.71 | 137.53  | 404.63   | 1012.98  | 2992.46   |
| 0.31 | 1050021.44    | 3657805.20     | 10092505.42    | 31823936.29     | 0.72 | 108.64  | 320.39   | 796.01   | 2400.85   |
| 0.32 | 806456.76     | 2831183.57     | 7809859.76     | 24548043.81     | 0.73 | 87.41   | 249.84   | 607.74   | 1788.25   |
| 0.33 | 609812.23     | 2213857.68     | 5977954.54     | 18968284.27     | 0.74 | 70.03   | 197.51   | 483.94   | 1363.91   |
| 0.34 | 474716.11     | 1694088.69     | 4718224.47     | 15089465.67     | 0.75 | 56.27   | 156.22   | 376.80   | 1038.47   |
| 0.35 | 367667.08     | 1312415.13     | 3670358.14     | 12249352.52     | 0.76 | 45.36   | 119.05   | 293.70   | 773.59    |
| 0.36 | 289921.17     | 1031797.60     | 2946113.01     | 9343643.83      | 0.77 | 36.19   | 93.29    | 224.71   | 607.82    |
| 0.37 | 226596.89     | 791821.12      | 2273132.34     | 6981035.95      | 0.78 | 28.79   | 72.56    | 166.95   | 446.46    |
| 0.38 | 175309.07     | 627025.89      | 1820140.98     | 5706703.00      | 0.79 | 22.50   | 56.07    | 130.97   | 343.89    |
| 0.39 | 138231.68     | 486835.20      | 1385800.41     | 4411236.16      | 0.80 | 17.99   | 43.48    | 99.99    | 257.25    |
| 0.40 | 109764.13     | 382752.22      | 1091895.43     | 3456876.22      | 0.81 | 14.05   | 32.98    | 73.40    | 198.15    |
| 0.41 | 86541.91      | 309793.37      | 863945.16      | 2710966.41      | 0.82 | 11.14   | 25.29    | 55.22    | 143.09    |
| 0.42 | 68679.44      | 242062.11      | 682073.82      | 2097578.42      | 0.83 | 8.61    | 18.97    | 40.84    | 104.13    |
| 0.43 | 55918.03      | 192476.17      | 543401.19      | 1641546.46      | 0.84 | 6.71    | 14.18    | 30.80    | 74.54     |
| 0.44 | 44401.28      | 154165.65      | 429357.16      | 1329416.23      | 0.85 | 5.22    | 10.71    | 22.44    | 53.38     |
| 0.45 | 36050.77      | 124955.91      | 349845.30      | 1106355.64      | 0.86 | 3.99    | 8.01     | 16.43    | 39.67     |
| 0.46 | 28549.93      | 100498.02      | 285496.10      | 847103.34       | 0.87 | 3.09    | 5.95     | 11.75    | 26.98     |
| 0.47 | 23052.47      | 80803.60       | 227700.41      | 697006.10       | 0.88 | 2.31    | 4.32     | 8.17     | 18.32     |
| 0.48 | 18730.45      | 63506.73       | 176296.18      | 555299.41       | 0.89 | 1.80    | 3.17     | 5.77     | 12.45     |
| 0.49 | 15206.55      | 51558.77       | 144054.90      | 430995.35       | 0.90 | 1.38    | 2.30     | 3.95     | 8.41      |
| 0.50 | 12162.46      | 41344.90       | 118582.10      | 364780.68       |      |         |          |          |           |

Table S340: Critical values for detector  $\hat{H}_{mov,sn}^{m,0.3}$  with windows size  $n = 0.3$ , and FM-OLS and D-OLS estimation in a model with intercept and linear trend. The number of integrated regressors is 1 and the highest power of  $x_{kt}$  is 3.

| m    | 90 %           | 95 %            | 97.5 %          | 99 %             | m    | 90 %     | 95 %      | 97.5 %    | 99 %       |
|------|----------------|-----------------|-----------------|------------------|------|----------|-----------|-----------|------------|
| 0.10 | 30732544409.66 | 114247914309.99 | 356792301502.28 | 1212824122868.26 | 0.51 | 62877.35 | 240791.54 | 726594.78 | 2505374.11 |
| 0.11 | 16097559699.46 | 60320666993.85  | 190158739143.01 | 642324706621.98  | 0.52 | 51211.16 | 193157.16 | 570327.73 | 1986390.90 |
| 0.12 | 8982451694.61  | 33270667278.92  | 105221479174.48 | 366981510042.44  | 0.53 | 40945.47 | 155175.16 | 454243.71 | 1628657.75 |
| 0.13 | 5119881191.21  | 19315270872.63  | 58899683757.32  | 204936485081.54  | 0.54 | 33256.35 | 124675.07 | 366776.99 | 1281972.52 |
| 0.14 | 3003842570.85  | 11514865352.60  | 35866550259.00  | 120988882132.17  | 0.55 | 26750.72 | 100896.01 | 306177.18 | 1056117.26 |
| 0.15 | 1865537923.10  | 7149815917.65   | 21699078352.67  | 74092551575.56   | 0.56 | 21912.42 | 81629.43  | 252707.79 | 815905.74  |
| 0.16 | 1155652429.25  | 4358495282.35   | 13487827652.01  | 47389094880.18   | 0.57 | 17870.46 | 66334.43  | 199161.07 | 677817.98  |
| 0.17 | 747486456.71   | 2865944576.24   | 8745632226.65   | 30528634181.04   | 0.58 | 14455.13 | 52455.28  | 158119.59 | 536985.10  |
| 0.18 | 501726726.51   | 1902319314.84   | 5825358680.53   | 20401487137.60   | 0.59 | 11357.12 | 41544.04  | 124629.05 | 430843.83  |
| 0.19 | 338241940.87   | 1263453989.78   | 3841857720.41   | 14157049319.98   | 0.60 | 9166.28  | 33046.28  | 99685.65  | 341080.33  |
| 0.20 | 227838917.18   | 876343407.92    | 2673319785.24   | 9714387947.86    | 0.61 | 7319.96  | 26783.43  | 79405.79  | 271180.49  |
| 0.21 | 157604040.63   | 596597955.68    | 1876448528.29   | 6908445893.70    | 0.62 | 5979.53  | 21610.19  | 62545.66  | 208655.94  |
| 0.22 | 110912959.00   | 415064154.07    | 1318813268.77   | 4905703816.08    | 0.63 | 4889.28  | 17265.79  | 49111.07  | 162730.15  |
| 0.23 | 80655552.86    | 300735277.46    | 932766126.00    | 3280065657.85    | 0.64 | 3862.26  | 13789.00  | 39972.67  | 127898.03  |
| 0.24 | 57758800.61    | 212479984.42    | 657777265.54    | 2339261613.14    | 0.65 | 3134.31  | 11086.40  | 31550.15  | 100140.12  |
| 0.25 | 41550591.42    | 156554431.57    | 476451147.89    | 1588462109.79    | 0.66 | 2519.36  | 8726.23   | 24499.08  | 80856.00   |
| 0.26 | 30633266.57    | 117160172.32    | 346285697.87    | 1179558114.59    | 0.67 | 2021.83  | 6853.18   | 19481.78  | 62403.47   |
| 0.27 | 22366592.56    | 84817002.59     | 251342804.27    | 853235112.33     | 0.68 | 1623.54  | 5507.57   | 15395.73  | 48394.14   |
| 0.28 | 16784971.28    | 62803906.28     | 187055032.11    | 623539623.12     | 0.69 | 1299.34  | 4418.52   | 12080.02  | 38056.27   |
| 0.29 | 12445614.71    | 47289478.61     | 141079439.51    | 465451736.87     | 0.70 | 1030.07  | 3484.89   | 9666.96   | 31291.57   |
| 0.30 | 9335762.02     | 35861667.91     | 108481623.31    | 366670751.54     | 0.71 | 802.60   | 2756.15   | 7699.53   | 23907.58   |
| 0.31 | 7088595.59     | 28089840.04     | 83575872.97     | 274075614.34     | 0.72 | 640.49   | 2162.82   | 6001.04   | 19207.66   |
| 0.32 | 5457840.26     | 21367572.72     | 64522615.68     | 210125551.61     | 0.73 | 509.67   | 1694.20   | 4699.16   | 14773.83   |
| 0.33 | 4272059.48     | 16197735.12     | 49686988.28     | 176994504.59     | 0.74 | 405.26   | 1331.13   | 3556.33   | 11394.25   |
| 0.34 | 3335128.39     | 12591888.63     | 37768253.82     | 130048107.26     | 0.75 | 320.11   | 1033.13   | 2842.22   | 8572.96    |
| 0.35 | 2558355.22     | 9873283.16      | 29798934.53     | 104221841.54     | 0.76 | 252.94   | 815.05    | 2229.34   | 6513.73    |
| 0.36 | 2019063.58     | 7673414.81      | 23314044.69     | 8126491.36       | 0.77 | 198.33   | 630.12    | 1707.49   | 5006.80    |
| 0.37 | 1548531.03     | 5920373.15      | 18284320.23     | 65961314.56      | 0.78 | 153.62   | 488.94    | 1278.34   | 3892.67    |
| 0.38 | 1217269.61     | 4714940.20      | 14542264.06     | 52265234.01      | 0.79 | 121.02   | 372.23    | 979.04    | 2898.80    |
| 0.39 | 962837.06      | 3680283.38      | 11199778.61     | 41212372.05      | 0.80 | 94.02    | 278.12    | 739.78    | 2194.93    |
| 0.40 | 763028.28      | 2879746.48      | 8901678.92      | 32949248.24      | 0.81 | 72.59    | 209.66    | 567.99    | 1660.26    |
| 0.41 | 604295.44      | 2298800.53      | 6979340.04      | 25911844.78      | 0.82 | 55.72    | 160.14    | 412.82    | 1230.62    |
| 0.42 | 474673.46      | 1784245.13      | 5601221.11      | 20497079.38      | 0.83 | 42.56    | 121.09    | 308.03    | 906.50     |
| 0.43 | 378949.46      | 1436178.00      | 4465399.37      | 15485634.92      | 0.84 | 32.01    | 89.53     | 228.92    | 663.55     |
| 0.44 | 302392.49      | 1142657.20      | 3475877.94      | 12096124.71      | 0.85 | 24.62    | 64.99     | 164.12    | 460.85     |
| 0.45 | 240477.93      | 902757.40       | 2737886.78      | 9924772.20       | 0.86 | 18.51    | 48.13     | 119.04    | 323.50     |
| 0.46 | 192401.17      | 722363.80       | 2193796.53      | 7926090.83       | 0.87 | 13.96    | 34.41     | 81.85     | 223.87     |
| 0.47 | 155007.39      | 572633.90       | 1770647.83      | 6300373.35       | 0.88 | 10.52    | 24.47     | 56.83     | 151.99     |
| 0.48 | 125570.59      | 460150.93       | 1401487.08      | 4966962.91       | 0.89 | 7.85     | 17.28     | 38.03     | 102.65     |
| 0.49 | 98456.15       | 370316.11       | 1131376.31      | 3854064.14       | 0.90 | 5.81     | 12.09     | 25.60     | 65.95      |
| 0.50 | 77266.44       | 303028.20       | 895622.31       | 3152996.41       |      |          |           |           |            |

Table S341: Critical values for detector  $\hat{H}_{mov,sn}^{m,0.3}$  with windows size  $n = 0.3$ , and IM-OLS estimation in a model with intercept and linear trend. The number of integrated regressors is 1 and the highest power of  $x_{kt}$  is 3.

## 5.2 Number of I(1) regressors: 2

| m    | 90 %      | 95 %      | 97,5 %    | 99 %       | m    | 90 %  | 95 %   | 97,5 % | 99 %   |
|------|-----------|-----------|-----------|------------|------|-------|--------|--------|--------|
| 0.10 | 317280.40 | 570669.12 | 917487.45 | 1542956.61 | 0.51 | 97.78 | 167.13 | 263.61 | 447.08 |
| 0.11 | 210017.86 | 372344.17 | 592751.12 | 1019376.17 | 0.52 | 86.25 | 148.82 | 237.13 | 395.69 |
| 0.12 | 141643.27 | 253040.41 | 407001.99 | 692575.00  | 0.53 | 76.08 | 130.51 | 208.37 | 347.05 |
| 0.13 | 98605.22  | 178195.04 | 292179.97 | 512673.85  | 0.54 | 67.20 | 115.52 | 181.25 | 304.02 |
| 0.14 | 70566.03  | 127671.13 | 210565.23 | 367724.94  | 0.55 | 59.49 | 102.72 | 159.11 | 266.22 |
| 0.15 | 51586.10  | 93059.26  | 154106.86 | 267033.61  | 0.56 | 52.74 | 89.55  | 138.88 | 225.96 |
| 0.16 | 38292.68  | 69438.84  | 113724.56 | 194278.95  | 0.57 | 46.72 | 78.46  | 123.11 | 198.93 |
| 0.17 | 29134.76  | 52243.14  | 86451.32  | 151513.62  | 0.58 | 41.47 | 69.76  | 109.20 | 175.65 |
| 0.18 | 22541.38  | 39801.43  | 64721.27  | 114368.96  | 0.59 | 36.84 | 61.95  | 95.75  | 156.65 |
| 0.19 | 17293.96  | 30867.46  | 50238.46  | 89349.45   | 0.60 | 32.80 | 54.88  | 84.36  | 138.47 |
| 0.20 | 13664.47  | 24220.80  | 39557.04  | 67154.21   | 0.61 | 29.17 | 48.71  | 74.44  | 123.74 |
| 0.21 | 10912.35  | 19352.62  | 31652.37  | 54261.43   | 0.62 | 25.82 | 42.59  | 65.71  | 108.57 |
| 0.22 | 8724.57   | 15590.03  | 25115.61  | 42913.28   | 0.63 | 22.96 | 38.28  | 58.99  | 94.39  |
| 0.23 | 7051.43   | 12642.41  | 20035.52  | 34355.06   | 0.64 | 20.29 | 34.01  | 51.80  | 83.24  |
| 0.24 | 5730.95   | 10334.60  | 16610.37  | 28110.79   | 0.65 | 18.07 | 29.99  | 45.96  | 74.67  |
| 0.25 | 4692.29   | 8434.59   | 13688.52  | 23197.64   | 0.66 | 15.92 | 26.34  | 39.64  | 65.13  |
| 0.26 | 3880.07   | 6887.37   | 11297.58  | 19212.70   | 0.67 | 14.20 | 23.36  | 35.07  | 55.55  |
| 0.27 | 3231.78   | 5733.36   | 9139.86   | 15822.36   | 0.68 | 12.56 | 20.41  | 31.09  | 49.24  |
| 0.28 | 2664.77   | 4753.92   | 7646.16   | 12993.55   | 0.69 | 11.03 | 17.84  | 27.27  | 43.13  |
| 0.29 | 2241.52   | 3981.95   | 6380.70   | 10883.86   | 0.70 | 9.77  | 15.85  | 23.94  | 37.80  |
| 0.30 | 1867.10   | 3336.43   | 5416.88   | 8991.56    | 0.71 | 8.62  | 14.03  | 21.09  | 33.87  |
| 0.31 | 1565.27   | 2801.53   | 4555.84   | 7589.35    | 0.72 | 7.61  | 12.41  | 18.66  | 29.51  |
| 0.32 | 1338.93   | 2378.03   | 3874.48   | 6488.69    | 0.73 | 6.70  | 10.79  | 16.22  | 25.22  |
| 0.33 | 1133.49   | 2061.14   | 3293.29   | 5573.68    | 0.74 | 5.88  | 9.48   | 14.10  | 22.19  |
| 0.34 | 976.67    | 1738.83   | 2824.60   | 4823.69    | 0.75 | 5.22  | 8.34   | 12.46  | 18.90  |
| 0.35 | 832.85    | 1488.68   | 2417.54   | 4068.85    | 0.76 | 4.55  | 7.26   | 10.74  | 16.44  |
| 0.36 | 727.70    | 1290.01   | 2070.68   | 3496.56    | 0.77 | 3.97  | 6.29   | 9.23   | 14.16  |
| 0.37 | 631.40    | 1114.98   | 1784.79   | 3031.19    | 0.78 | 3.48  | 5.49   | 8.10   | 12.39  |
| 0.38 | 542.80    | 959.77    | 1532.91   | 2545.03    | 0.79 | 3.01  | 4.73   | 6.97   | 10.44  |
| 0.39 | 473.66    | 830.35    | 1321.10   | 2196.84    | 0.80 | 2.59  | 4.11   | 5.95   | 8.87   |
| 0.40 | 409.11    | 717.86    | 1148.21   | 1900.93    | 0.81 | 2.24  | 3.51   | 5.06   | 7.69   |
| 0.41 | 358.15    | 628.88    | 1002.21   | 1645.66    | 0.82 | 1.92  | 3.01   | 4.35   | 6.49   |
| 0.42 | 313.93    | 548.48    | 877.43    | 1466.25    | 0.83 | 1.63  | 2.56   | 3.67   | 5.48   |
| 0.43 | 274.14    | 482.44    | 768.29    | 1300.13    | 0.84 | 1.39  | 2.17   | 3.15   | 4.63   |
| 0.44 | 242.76    | 418.65    | 673.73    | 1116.57    | 0.85 | 1.17  | 1.82   | 2.60   | 3.87   |
| 0.45 | 210.71    | 364.87    | 584.90    | 982.84     | 0.86 | 0.97  | 1.50   | 2.12   | 3.14   |
| 0.46 | 182.45    | 317.56    | 510.96    | 852.02     | 0.87 | 0.80  | 1.23   | 1.76   | 2.54   |
| 0.47 | 161.40    | 280.17    | 446.64    | 755.59     | 0.88 | 0.64  | 0.99   | 1.41   | 2.04   |
| 0.48 | 141.83    | 246.38    | 386.66    | 658.89     | 0.89 | 0.52  | 0.79   | 1.12   | 1.63   |
| 0.49 | 124.69    | 217.62    | 343.14    | 576.60     | 0.90 | 0.42  | 0.61   | 0.86   | 1.25   |
| 0.50 | 110.86    | 190.06    | 302.67    | 509.44     |      |       |        |        |        |

Table S342: Critical values for detector  $\hat{H}_{mov,sn}^{m,0.1}$  with windows size  $n = 0.1$ , and FM-OLS and D-OLS estimation in a model with intercept. The number of integrated regressors is 2 and the highest power of  $x_{kt}$  is 1.

| m    | 90 %       | 95 %       | 97,5 %     | 99 %       | m    | 90 %   | 95 %   | 97,5 %  | 99 %    |
|------|------------|------------|------------|------------|------|--------|--------|---------|---------|
| 0.10 | 1335859.84 | 2367244.88 | 3782659.08 | 6516741.41 | 0.51 | 383.79 | 656.41 | 1043.20 | 1740.51 |
| 0.11 | 869219.35  | 1529685.52 | 2485080.86 | 4184866.32 | 0.52 | 339.38 | 575.42 | 915.01  | 1531.41 |
| 0.12 | 589130.41  | 1052905.67 | 1693163.41 | 2825747.99 | 0.53 | 299.33 | 507.41 | 799.33  | 1340.17 |
| 0.13 | 406986.83  | 737580.71  | 1210049.34 | 2014634.54 | 0.54 | 263.81 | 452.18 | 705.55  | 1164.76 |
| 0.14 | 296250.92  | 528492.86  | 863194.24  | 1477051.52 | 0.55 | 233.90 | 396.26 | 619.44  | 1033.18 |
| 0.15 | 217988.60  | 384708.56  | 626967.37  | 1077996.54 | 0.56 | 206.65 | 349.73 | 541.20  | 905.10  |
| 0.16 | 160305.22  | 288175.32  | 467938.81  | 792611.93  | 0.57 | 183.26 | 307.50 | 477.10  | 785.93  |
| 0.17 | 121500.83  | 216055.33  | 349714.91  | 595293.74  | 0.58 | 162.24 | 270.32 | 421.82  | 694.80  |
| 0.18 | 93029.98   | 165078.48  | 266213.56  | 456652.68  | 0.59 | 143.23 | 240.33 | 372.01  | 605.36  |
| 0.19 | 72256.32   | 127493.26  | 208821.06  | 355758.17  | 0.60 | 126.61 | 213.79 | 330.84  | 533.24  |
| 0.20 | 57256.17   | 101183.86  | 162505.40  | 276358.00  | 0.61 | 112.54 | 189.80 | 292.77  | 469.66  |
| 0.21 | 45246.22   | 80766.10   | 129695.92  | 223032.48  | 0.62 | 100.21 | 167.85 | 259.35  | 415.59  |
| 0.22 | 35928.71   | 64570.82   | 103936.52  | 178672.78  | 0.63 | 88.93  | 147.49 | 227.53  | 366.05  |
| 0.23 | 29315.79   | 51949.85   | 84097.56   | 144102.81  | 0.64 | 78.99  | 129.91 | 201.16  | 320.09  |
| 0.24 | 23648.42   | 42566.08   | 68466.33   | 116009.88  | 0.65 | 69.87  | 114.52 | 177.09  | 280.28  |
| 0.25 | 19296.98   | 34215.43   | 56608.59   | 96079.64   | 0.66 | 62.11  | 101.66 | 155.30  | 248.48  |
| 0.26 | 15866.81   | 28544.31   | 46540.95   | 78026.27   | 0.67 | 54.94  | 90.15  | 136.09  | 218.86  |
| 0.27 | 13112.61   | 23685.55   | 38017.18   | 64906.27   | 0.68 | 48.75  | 79.22  | 119.52  | 192.93  |
| 0.28 | 10980.16   | 19452.51   | 31182.95   | 54548.54   | 0.69 | 43.16  | 70.10  | 104.41  | 167.37  |
| 0.29 | 9220.17    | 16197.09   | 26001.25   | 44743.77   | 0.70 | 38.11  | 61.61  | 92.10   | 147.18  |
| 0.30 | 7722.93    | 13601.25   | 21710.01   | 37700.02   | 0.71 | 33.65  | 54.45  | 80.80   | 126.39  |
| 0.31 | 6500.46    | 11480.65   | 18198.25   | 31629.83   | 0.72 | 29.77  | 48.03  | 70.79   | 110.53  |
| 0.32 | 5460.99    | 9676.29    | 15351.92   | 26443.52   | 0.73 | 26.23  | 42.21  | 62.28   | 95.70   |
| 0.33 | 4648.61    | 8170.52    | 13111.91   | 22375.30   | 0.74 | 23.17  | 36.79  | 54.51   | 82.91   |
| 0.34 | 3942.84    | 6980.85    | 11126.52   | 18891.45   | 0.75 | 20.29  | 32.26  | 46.94   | 71.92   |
| 0.35 | 3368.65    | 5888.47    | 9461.87    | 16107.26   | 0.76 | 17.80  | 28.11  | 40.99   | 62.35   |
| 0.36 | 2924.15    | 5087.47    | 8198.64    | 14003.78   | 0.77 | 15.71  | 24.50  | 35.53   | 53.89   |
| 0.37 | 2497.18    | 4417.25    | 7042.12    | 11944.24   | 0.78 | 13.80  | 21.22  | 30.78   | 46.19   |
| 0.38 | 2169.56    | 3789.99    | 6005.26    | 10238.55   | 0.79 | 12.06  | 18.47  | 26.35   | 39.21   |
| 0.39 | 1880.92    | 3267.49    | 5188.35    | 8871.17    | 0.80 | 10.49  | 16.06  | 22.64   | 33.65   |
| 0.40 | 1642.60    | 2835.17    | 4461.74    | 7641.77    | 0.81 | 9.12   | 13.92  | 19.43   | 28.76   |
| 0.41 | 1423.75    | 2470.85    | 3909.19    | 6583.29    | 0.82 | 7.89   | 11.97  | 16.61   | 24.26   |
| 0.42 | 1238.95    | 2164.07    | 3418.25    | 5682.58    | 0.83 | 6.81   | 10.24  | 14.09   | 20.14   |
| 0.43 | 1080.20    | 1883.13    | 3007.86    | 4920.14    | 0.84 | 5.84   | 8.71   | 12.02   | 17.08   |
| 0.44 | 947.40     | 1647.86    | 2608.20    | 4322.10    | 0.85 | 5.00   | 7.40   | 10.21   | 14.35   |
| 0.45 | 829.37     | 1442.47    | 2291.15    | 3778.28    | 0.86 | 4.25   | 6.24   | 8.51    | 11.91   |
| 0.46 | 725.92     | 1261.51    | 2005.67    | 3358.22    | 0.87 | 3.59   | 5.23   | 7.10    | 9.92    |
| 0.47 | 635.66     | 1104.92    | 1765.12    | 2922.62    | 0.88 | 3.00   | 4.35   | 5.89    | 8.18    |
| 0.48 | 558.61     | 972.28     | 1528.73    | 2554.79    | 0.89 | 2.49   | 3.59   | 4.82    | 6.65    |
| 0.49 | 490.04     | 853.13     | 1347.45    | 2270.80    | 0.90 | 2.06   | 2.94   | 3.88    | 5.32    |
| 0.50 | 432.28     | 744.29     | 1191.62    | 1987.62    |      |        |        |         |         |

Table S343: Critical values for detector  $\hat{H}_{mov,sn}^{m,0.1}$  with windows size  $n = 0.1$ , and IM-OLS estimation in a model with intercept. The number of integrated regressors is 2 and the highest power of  $x_{kt}$  is 1.



| m    | 90 %      | 95 %      | 97,5 %     | 99 %       | m    | 90 %   | 95 %   | 97,5 % | 99 %   |
|------|-----------|-----------|------------|------------|------|--------|--------|--------|--------|
| 0.10 | 504541.17 | 915798.56 | 1482681.75 | 2507522.08 | 0.51 | 146.60 | 251.83 | 398.36 | 670.08 |
| 0.11 | 332751.40 | 599635.57 | 963842.45  | 1651783.09 | 0.52 | 128.83 | 224.32 | 353.80 | 591.85 |
| 0.12 | 225492.61 | 407846.36 | 660804.66  | 1128298.91 | 0.53 | 113.20 | 194.78 | 310.51 | 516.39 |
| 0.13 | 157331.45 | 286445.74 | 473396.84  | 833440.81  | 0.54 | 99.43  | 171.98 | 269.13 | 449.64 |
| 0.14 | 112699.70 | 205768.19 | 340678.84  | 594906.37  | 0.55 | 88.28  | 151.10 | 236.55 | 393.35 |
| 0.15 | 82599.38  | 149886.78 | 249735.32  | 432663.26  | 0.56 | 77.56  | 132.31 | 203.69 | 333.59 |
| 0.16 | 61150.50  | 111775.26 | 185375.90  | 317037.48  | 0.57 | 68.34  | 115.40 | 180.63 | 287.85 |
| 0.17 | 46694.65  | 84221.03  | 140257.01  | 245943.10  | 0.58 | 60.61  | 101.86 | 158.51 | 255.49 |
| 0.18 | 36081.89  | 64138.82  | 105338.80  | 187573.96  | 0.59 | 53.45  | 90.18  | 138.39 | 225.84 |
| 0.19 | 27693.01  | 49798.68  | 81131.68   | 145141.97  | 0.60 | 47.20  | 79.29  | 121.29 | 198.74 |
| 0.20 | 21839.54  | 39106.01  | 64142.20   | 109539.44  | 0.61 | 41.75  | 70.06  | 106.56 | 175.58 |
| 0.21 | 17433.83  | 31165.86  | 51403.67   | 88114.92   | 0.62 | 36.77  | 60.87  | 92.72  | 153.83 |
| 0.22 | 13907.19  | 25048.47  | 40597.60   | 69526.45   | 0.63 | 32.44  | 54.13  | 82.96  | 133.12 |
| 0.23 | 11261.51  | 20375.80  | 32359.85   | 55779.78   | 0.64 | 28.55  | 47.86  | 72.76  | 116.16 |
| 0.24 | 9120.44   | 16531.83  | 26888.09   | 45676.56   | 0.65 | 25.13  | 41.78  | 64.29  | 103.44 |
| 0.25 | 7474.45   | 13568.27  | 22092.12   | 37514.35   | 0.66 | 22.08  | 36.48  | 55.25  | 89.31  |
| 0.26 | 6166.58   | 11067.86  | 18107.11   | 31217.44   | 0.67 | 19.50  | 32.13  | 48.30  | 76.28  |
| 0.27 | 5143.85   | 9177.42   | 14622.75   | 25485.40   | 0.68 | 17.05  | 27.76  | 42.16  | 66.49  |
| 0.28 | 4252.62   | 7614.28   | 12281.09   | 20988.88   | 0.69 | 14.91  | 24.14  | 36.87  | 57.91  |
| 0.29 | 3547.34   | 6363.29   | 10287.71   | 17407.83   | 0.70 | 13.07  | 21.31  | 32.11  | 50.33  |
| 0.30 | 2971.32   | 5352.95   | 8695.20    | 14401.01   | 0.71 | 11.41  | 18.55  | 27.82  | 44.48  |
| 0.31 | 2477.00   | 4469.22   | 7274.42    | 12219.07   | 0.72 | 10.00  | 16.19  | 24.34  | 38.63  |
| 0.32 | 2114.07   | 3770.75   | 6182.21    | 10330.43   | 0.73 | 8.72   | 14.02  | 21.08  | 32.83  |
| 0.33 | 1787.64   | 3264.87   | 5264.21    | 8883.39    | 0.74 | 7.53   | 12.07  | 17.92  | 28.26  |
| 0.34 | 1537.76   | 2756.21   | 4486.93    | 7681.10    | 0.75 | 6.60   | 10.53  | 15.63  | 23.94  |
| 0.35 | 1309.91   | 2357.95   | 3837.87    | 6476.32    | 0.76 | 5.69   | 9.02   | 13.30  | 20.21  |
| 0.36 | 1142.08   | 2034.23   | 3265.48    | 5507.00    | 0.77 | 4.88   | 7.75   | 11.28  | 17.26  |
| 0.37 | 985.53    | 1752.72   | 2815.15    | 4756.28    | 0.78 | 4.20   | 6.63   | 9.72   | 14.72  |
| 0.38 | 846.76    | 1502.42   | 2406.41    | 4060.22    | 0.79 | 3.57   | 5.61   | 8.15   | 12.26  |
| 0.39 | 737.89    | 1300.15   | 2071.50    | 3440.69    | 0.80 | 3.03   | 4.78   | 6.96   | 10.28  |
| 0.40 | 634.90    | 1120.52   | 1793.15    | 2951.65    | 0.81 | 2.57   | 3.99   | 5.76   | 8.70   |
| 0.41 | 554.22    | 975.47    | 1563.36    | 2568.21    | 0.82 | 2.16   | 3.36   | 4.84   | 7.16   |
| 0.42 | 484.01    | 852.55    | 1366.21    | 2289.30    | 0.83 | 1.81   | 2.83   | 4.04   | 5.99   |
| 0.43 | 422.20    | 746.51    | 1193.81    | 2014.53    | 0.84 | 1.51   | 2.36   | 3.39   | 4.99   |
| 0.44 | 373.35    | 646.41    | 1042.39    | 1714.23    | 0.85 | 1.27   | 1.95   | 2.77   | 4.10   |
| 0.45 | 322.99    | 559.23    | 897.63     | 1522.96    | 0.86 | 1.07   | 1.60   | 2.24   | 3.30   |
| 0.46 | 279.17    | 485.49    | 782.23     | 1301.89    | 0.87 | 0.92   | 1.31   | 1.85   | 2.66   |
| 0.47 | 246.23    | 427.63    | 679.65     | 1149.63    | 0.88 | 0.81   | 1.08   | 1.49   | 2.12   |
| 0.48 | 215.26    | 373.93    | 587.45     | 999.90     | 0.89 | 0.72   | 0.91   | 1.19   | 1.71   |
| 0.49 | 187.88    | 331.02    | 520.53     | 870.37     | 0.90 | 0.64   | 0.79   | 0.97   | 1.34   |
| 0.50 | 166.65    | 289.59    | 455.87     | 768.54     |      |        |        |        |        |

Table S344: Critical values for detector  $\hat{H}_{mov,sn}^{m,0.2}$  with windows size  $n = 0.2$ , and FM-OLS and D-OLS estimation in a model with intercept. The number of integrated regressors is 2 and the highest power of  $x_{kt}$  is 1.

| m    | 90 %       | 95 %       | 97,5 %     | 99 %        | m    | 90 %   | 95 %   | 97,5 %  | 99 %    |
|------|------------|------------|------------|-------------|------|--------|--------|---------|---------|
| 0.10 | 2117464.17 | 3822112.75 | 6148086.76 | 10654997.28 | 0.51 | 577.89 | 992.49 | 1574.78 | 2604.84 |
| 0.11 | 1383782.23 | 2465873.55 | 4020607.54 | 6858081.57  | 0.52 | 510.99 | 861.35 | 1374.15 | 2283.95 |
| 0.12 | 941056.81  | 1693785.89 | 2746108.18 | 4638285.51  | 0.53 | 448.38 | 757.55 | 1198.29 | 2009.34 |
| 0.13 | 650993.44  | 1185436.77 | 1952903.44 | 3285501.64  | 0.54 | 392.84 | 670.14 | 1049.48 | 1737.41 |
| 0.14 | 472718.89  | 852279.47  | 1405498.69 | 2400173.77  | 0.55 | 348.26 | 589.69 | 918.86  | 1523.21 |
| 0.15 | 348334.36  | 620079.00  | 1020303.77 | 1760449.80  | 0.56 | 305.73 | 514.92 | 795.21  | 1320.67 |
| 0.16 | 257471.34  | 464868.72  | 758887.52  | 1291302.38  | 0.57 | 269.82 | 451.56 | 699.95  | 1155.85 |
| 0.17 | 194164.47  | 348875.18  | 565708.43  | 970072.14   | 0.58 | 238.19 | 397.01 | 616.47  | 1009.69 |
| 0.18 | 148915.73  | 266139.95  | 432948.21  | 745599.20   | 0.59 | 209.71 | 352.61 | 539.87  | 869.11  |
| 0.19 | 115400.95  | 205341.30  | 338445.28  | 579982.71   | 0.60 | 184.19 | 310.24 | 474.99  | 760.34  |
| 0.20 | 91734.67   | 163692.28  | 261781.74  | 450736.98   | 0.61 | 162.53 | 272.95 | 415.88  | 667.89  |
| 0.21 | 72059.02   | 129904.37  | 208682.38  | 362872.95   | 0.62 | 144.28 | 239.40 | 368.31  | 584.50  |
| 0.22 | 57634.90   | 104547.68  | 167323.89  | 290779.34   | 0.63 | 127.42 | 209.11 | 321.91  | 514.48  |
| 0.23 | 46766.89   | 83798.79   | 136123.96  | 233256.03   | 0.64 | 112.29 | 183.82 | 281.30  | 446.50  |
| 0.24 | 37735.79   | 68301.95   | 111422.90  | 186506.55   | 0.65 | 98.49  | 161.40 | 246.46  | 387.93  |
| 0.25 | 30868.49   | 55028.44   | 91623.19   | 155121.71   | 0.66 | 86.90  | 141.44 | 215.23  | 339.82  |
| 0.26 | 25386.09   | 45766.32   | 74900.73   | 126331.19   | 0.67 | 76.73  | 124.44 | 186.65  | 297.29  |
| 0.27 | 20949.36   | 38012.40   | 60937.15   | 105072.97   | 0.68 | 67.27  | 109.01 | 163.03  | 259.82  |
| 0.28 | 17486.63   | 31109.70   | 50158.19   | 87790.27    | 0.69 | 59.22  | 95.39  | 141.76  | 225.45  |
| 0.29 | 14640.22   | 25976.48   | 41636.09   | 72566.58    | 0.70 | 52.02  | 83.10  | 124.02  | 194.84  |
| 0.30 | 12276.92   | 21788.96   | 34714.27   | 60268.83    | 0.71 | 45.55  | 72.50  | 107.31  | 166.75  |
| 0.31 | 10332.26   | 18365.70   | 29103.08   | 50770.09    | 0.72 | 39.78  | 63.66  | 93.44   | 143.76  |
| 0.32 | 8637.62    | 15397.53   | 24646.82   | 42007.63    | 0.73 | 34.92  | 55.32  | 80.92   | 123.43  |
| 0.33 | 7365.02    | 13014.89   | 20911.97   | 35894.79    | 0.74 | 30.50  | 47.76  | 70.04   | 105.80  |
| 0.34 | 6231.72    | 11104.43   | 17700.51   | 30112.06    | 0.75 | 26.42  | 41.35  | 60.28   | 90.14   |
| 0.35 | 5320.06    | 9396.94    | 14979.82   | 25526.33    | 0.76 | 22.88  | 35.85  | 51.88   | 77.56   |
| 0.36 | 4581.11    | 8011.84    | 12933.20   | 22070.73    | 0.77 | 19.83  | 30.84  | 44.30   | 66.60   |
| 0.37 | 3935.44    | 6948.79    | 11074.78   | 18899.76    | 0.78 | 17.24  | 26.40  | 37.73   | 55.94   |
| 0.38 | 3388.04    | 5930.81    | 9436.76    | 16179.17    | 0.79 | 14.91  | 22.56  | 32.04   | 47.16   |
| 0.39 | 2939.59    | 5103.27    | 8194.42    | 13837.18    | 0.80 | 12.77  | 19.26  | 27.04   | 39.84   |
| 0.40 | 2559.90    | 4412.66    | 7011.13    | 11890.56    | 0.81 | 10.92  | 16.48  | 22.77   | 33.27   |
| 0.41 | 2215.28    | 3846.70    | 6098.11    | 10260.64    | 0.82 | 9.27   | 13.92  | 19.22   | 27.48   |
| 0.42 | 1927.50    | 3364.82    | 5313.45    | 8821.40     | 0.83 | 7.88   | 11.76  | 16.03   | 22.68   |
| 0.43 | 1673.61    | 2913.08    | 4663.88    | 7626.15     | 0.84 | 6.65   | 9.82   | 13.37   | 18.79   |
| 0.44 | 1461.46    | 2549.29    | 4049.24    | 6644.94     | 0.85 | 5.58   | 8.21   | 11.16   | 15.53   |
| 0.45 | 1273.76    | 2234.39    | 3537.44    | 5809.48     | 0.86 | 4.70   | 6.79   | 9.21    | 12.81   |
| 0.46 | 1115.83    | 1937.07    | 3071.90    | 5144.86     | 0.87 | 3.91   | 5.64   | 7.55    | 10.48   |
| 0.47 | 972.60     | 1690.72    | 2680.60    | 4503.87     | 0.88 | 3.23   | 4.61   | 6.22    | 8.50    |
| 0.48 | 852.22     | 1481.65    | 2332.18    | 3878.96     | 0.89 | 2.66   | 3.78   | 5.05    | 6.88    |
| 0.49 | 744.72     | 1300.79    | 2043.26    | 3439.69     | 0.90 | 2.19   | 3.07   | 4.04    | 5.47    |
| 0.50 | 654.32     | 1128.30    | 1791.30    | 3006.81     |      |        |        |         |         |

Table S345: Critical values for detector  $\hat{H}_{mov,sn}^{m,0.2}$  with windows size  $n = 0.2$ , and IM-OLS estimation in a model with intercept. The number of integrated regressors is 2 and the highest power of  $x_{kt}$  is 1.

| m    | 90 %      | 95 %       | 97,5 %     | 99 %       | m    | 90 %   | 95 %   | 97,5 % | 99 %   |
|------|-----------|------------|------------|------------|------|--------|--------|--------|--------|
| 0.10 | 615060.58 | 1125737.38 | 1818710.42 | 3107091.91 | 0.51 | 168.06 | 288.31 | 452.67 | 755.08 |
| 0.11 | 404570.49 | 732575.85  | 1188932.68 | 2043362.97 | 0.52 | 146.69 | 255.43 | 399.65 | 666.01 |
| 0.12 | 274046.78 | 500215.15  | 815935.34  | 1393150.01 | 0.53 | 128.65 | 221.36 | 349.98 | 583.87 |
| 0.13 | 192423.40 | 350163.77  | 579961.29  | 1032844.69 | 0.54 | 112.81 | 193.96 | 303.14 | 502.29 |
| 0.14 | 136778.10 | 252400.98  | 419703.96  | 734252.97  | 0.55 | 99.27  | 169.82 | 266.42 | 438.92 |
| 0.15 | 100339.64 | 184275.66  | 307481.45  | 533680.91  | 0.56 | 87.16  | 147.94 | 228.30 | 370.91 |
| 0.16 | 74249.62  | 136650.72  | 227748.99  | 392501.75  | 0.57 | 76.59  | 128.85 | 201.54 | 322.21 |
| 0.17 | 56873.14  | 103056.84  | 172265.37  | 301954.06  | 0.58 | 67.48  | 112.62 | 175.41 | 281.35 |
| 0.18 | 43918.54  | 78343.69   | 129054.87  | 230584.46  | 0.59 | 59.33  | 99.59  | 152.01 | 246.98 |
| 0.19 | 33617.22  | 60835.80   | 99209.71   | 179930.13  | 0.60 | 52.07  | 87.32  | 133.04 | 218.67 |
| 0.20 | 26447.48  | 47853.06   | 79040.94   | 135417.83  | 0.61 | 45.86  | 76.54  | 116.22 | 189.89 |
| 0.21 | 21143.73  | 38054.00   | 63023.54   | 108813.05  | 0.62 | 40.16  | 66.44  | 100.66 | 168.33 |
| 0.22 | 16856.16  | 30597.97   | 49783.15   | 85226.81   | 0.63 | 35.39  | 58.57  | 89.74  | 143.37 |
| 0.23 | 13658.25  | 24755.57   | 39438.05   | 68228.80   | 0.64 | 30.87  | 51.62  | 78.35  | 124.17 |
| 0.24 | 11016.59  | 20067.61   | 32879.96   | 56240.65   | 0.65 | 27.01  | 44.91  | 68.40  | 109.78 |
| 0.25 | 9050.25   | 16458.43   | 27004.28   | 45691.40   | 0.66 | 23.54  | 38.86  | 59.00  | 94.44  |
| 0.26 | 7451.66   | 13487.74   | 21906.30   | 37886.02   | 0.67 | 20.72  | 33.99  | 51.05  | 80.37  |
| 0.27 | 6211.32   | 11105.35   | 17767.85   | 30935.15   | 0.68 | 17.97  | 29.25  | 44.28  | 69.52  |
| 0.28 | 5132.64   | 9193.21    | 14804.17   | 25605.93   | 0.69 | 15.60  | 25.23  | 38.43  | 60.18  |
| 0.29 | 4254.94   | 7684.89    | 12421.39   | 21042.44   | 0.70 | 13.64  | 22.10  | 33.27  | 52.00  |
| 0.30 | 3559.93   | 6458.54    | 10482.87   | 17484.72   | 0.71 | 11.85  | 19.14  | 28.76  | 45.75  |
| 0.31 | 2967.07   | 5400.33    | 8775.32    | 14669.38   | 0.72 | 10.30  | 16.60  | 24.97  | 39.49  |
| 0.32 | 2536.46   | 4532.03    | 7456.00    | 12392.97   | 0.73 | 8.94   | 14.34  | 21.47  | 33.57  |
| 0.33 | 2137.27   | 3918.88    | 6295.68    | 10596.82   | 0.74 | 7.69   | 12.31  | 18.21  | 28.73  |
| 0.34 | 1838.71   | 3294.10    | 5393.65    | 9160.82    | 0.75 | 6.73   | 10.69  | 15.82  | 24.18  |
| 0.35 | 1562.99   | 2805.43    | 4592.35    | 7707.60    | 0.76 | 5.79   | 9.15   | 13.45  | 20.37  |
| 0.36 | 1359.52   | 2428.84    | 3872.97    | 6584.32    | 0.77 | 4.96   | 7.84   | 11.37  | 17.39  |
| 0.37 | 1172.09   | 2091.53    | 3330.67    | 5671.17    | 0.78 | 4.28   | 6.72   | 9.81   | 14.84  |
| 0.38 | 1000.60   | 1780.90    | 2839.36    | 4821.92    | 0.79 | 3.66   | 5.71   | 8.22   | 12.34  |
| 0.39 | 870.86    | 1545.33    | 2469.35    | 4061.69    | 0.80 | 3.13   | 4.87   | 7.05   | 10.36  |
| 0.40 | 746.54    | 1322.02    | 2107.15    | 3487.79    | 0.81 | 2.68   | 4.11   | 5.87   | 8.79   |
| 0.41 | 652.21    | 1151.18    | 1835.24    | 3028.65    | 0.82 | 2.28   | 3.47   | 4.96   | 7.28   |
| 0.42 | 568.33    | 999.73     | 1602.30    | 2688.28    | 0.83 | 1.93   | 2.95   | 4.16   | 6.09   |
| 0.43 | 494.92    | 874.18     | 1401.33    | 2355.48    | 0.84 | 1.64   | 2.48   | 3.51   | 5.10   |
| 0.44 | 434.88    | 757.21     | 1213.60    | 1998.86    | 0.85 | 1.40   | 2.08   | 2.89   | 4.22   |
| 0.45 | 376.33    | 651.00     | 1042.06    | 1767.05    | 0.86 | 1.24   | 1.73   | 2.37   | 3.42   |
| 0.46 | 324.70    | 564.58     | 912.12     | 1502.05    | 0.87 | 1.11   | 1.44   | 1.98   | 2.78   |
| 0.47 | 285.20    | 493.54     | 785.26     | 1329.17    | 0.88 | 1.01   | 1.23   | 1.61   | 2.25   |
| 0.48 | 248.81    | 431.50     | 677.92     | 1151.37    | 0.89 | 0.93   | 1.09   | 1.32   | 1.83   |
| 0.49 | 216.23    | 379.75     | 599.19     | 993.58     | 0.90 | 0.86   | 0.99   | 1.14   | 1.47   |
| 0.50 | 191.29    | 332.08     | 521.85     | 875.53     |      |        |        |        |        |

Table S346: Critical values for detector  $\hat{H}_{mov,sn}^{m,0.3}$  with windows size  $n = 0.3$ , and FM-OLS and D-OLS estimation in a model with intercept. The number of integrated regressors is 2 and the highest power of  $x_{kt}$  is 1.

| m    | 90 %       | 95 %       | 97,5 %     | 99 %        | m    | 90 %   | 95 %    | 97,5 %  | 99 %    |
|------|------------|------------|------------|-------------|------|--------|---------|---------|---------|
| 0.10 | 2573047.46 | 4685977.77 | 7602999.94 | 13168767.47 | 0.51 | 660.50 | 1135.23 | 1795.85 | 2961.71 |
| 0.11 | 1681199.37 | 3019546.70 | 4945193.12 | 8496488.39  | 0.52 | 581.79 | 983.39  | 1559.22 | 2568.22 |
| 0.12 | 1143216.02 | 2072716.09 | 3385184.91 | 5730042.81  | 0.53 | 510.66 | 860.15  | 1353.87 | 2253.10 |
| 0.13 | 794319.42  | 1453987.73 | 2404655.18 | 4095450.85  | 0.54 | 446.86 | 760.15  | 1183.58 | 1960.83 |
| 0.14 | 574499.56  | 1042701.03 | 1736874.28 | 2953160.95  | 0.55 | 392.97 | 663.35  | 1030.28 | 1693.24 |
| 0.15 | 424182.97  | 759083.72  | 1258956.74 | 2171480.20  | 0.56 | 345.38 | 577.63  | 888.60  | 1473.43 |
| 0.16 | 312368.00  | 569371.03  | 936106.14  | 1601446.20  | 0.57 | 302.76 | 503.26  | 776.40  | 1284.58 |
| 0.17 | 236188.26  | 427348.61  | 696265.88  | 1199270.12  | 0.58 | 265.29 | 442.39  | 682.87  | 1108.52 |
| 0.18 | 180967.25  | 324974.36  | 531206.71  | 921334.87   | 0.59 | 233.70 | 390.94  | 593.25  | 956.30  |
| 0.19 | 140187.07  | 250851.96  | 414324.41  | 713881.00   | 0.60 | 204.46 | 341.01  | 520.42  | 831.18  |
| 0.20 | 111278.68  | 200157.93  | 323019.09  | 554956.92   | 0.61 | 179.72 | 300.86  | 455.39  | 727.36  |
| 0.21 | 87538.18   | 158480.67  | 254241.15  | 442313.06   | 0.62 | 158.81 | 261.55  | 398.37  | 630.83  |
| 0.22 | 69918.92   | 127204.50  | 204805.24  | 356413.54   | 0.63 | 139.49 | 227.28  | 347.40  | 554.24  |
| 0.23 | 56728.44   | 101677.88  | 166417.38  | 285895.59   | 0.64 | 122.18 | 198.84  | 301.66  | 478.15  |
| 0.24 | 45688.46   | 82638.39   | 135600.70  | 227157.67   | 0.65 | 106.90 | 173.86  | 263.56  | 413.97  |
| 0.25 | 37352.64   | 66591.56   | 111832.43  | 190408.59   | 0.66 | 93.61  | 151.57  | 229.49  | 359.21  |
| 0.26 | 30719.94   | 55648.10   | 91197.53   | 153769.50   | 0.67 | 81.94  | 132.48  | 198.15  | 313.08  |
| 0.27 | 25292.83   | 45959.99   | 74107.08   | 127649.50   | 0.68 | 71.62  | 115.08  | 171.72  | 272.15  |
| 0.28 | 21081.12   | 37670.28   | 60941.55   | 106646.75   | 0.69 | 62.62  | 100.23  | 148.78  | 234.37  |
| 0.29 | 17605.71   | 31389.06   | 50560.89   | 87568.23    | 0.70 | 54.78  | 86.84   | 129.20  | 201.82  |
| 0.30 | 14756.76   | 26223.17   | 41872.99   | 72513.82    | 0.71 | 47.70  | 75.60   | 111.00  | 172.16  |
| 0.31 | 12380.04   | 22125.91   | 34999.71   | 60934.90    | 0.72 | 41.43  | 65.82   | 96.25   | 147.68  |
| 0.32 | 10334.44   | 18541.52   | 29625.99   | 50410.86    | 0.73 | 36.07  | 56.88   | 83.07   | 126.46  |
| 0.33 | 8785.18    | 15627.67   | 24968.72   | 42790.46    | 0.74 | 31.41  | 48.85   | 71.41   | 107.49  |
| 0.34 | 7429.84    | 13284.56   | 21154.99   | 36104.14    | 0.75 | 27.06  | 42.18   | 61.37   | 91.61   |
| 0.35 | 6328.22    | 11199.15   | 17888.91   | 30520.40    | 0.76 | 23.39  | 36.46   | 52.54   | 78.33   |
| 0.36 | 5418.86    | 9531.69    | 15374.75   | 26198.32    | 0.77 | 20.16  | 31.22   | 44.69   | 66.97   |
| 0.37 | 4646.12    | 8233.98    | 13147.25   | 22399.17    | 0.78 | 17.45  | 26.66   | 37.97   | 56.21   |
| 0.38 | 4023.09    | 7034.10    | 11194.19   | 19312.55    | 0.79 | 15.06  | 22.74   | 32.24   | 47.34   |
| 0.39 | 3485.15    | 6025.44    | 9691.86    | 16388.84    | 0.80 | 12.91  | 19.39   | 27.18   | 39.98   |
| 0.40 | 3010.30    | 5202.59    | 8286.93    | 13981.44    | 0.81 | 11.05  | 16.58   | 22.87   | 33.41   |
| 0.41 | 2612.55    | 4520.39    | 7147.21    | 11925.30    | 0.82 | 9.39   | 14.02   | 19.32   | 27.60   |
| 0.42 | 2258.82    | 3955.73    | 6251.49    | 10348.00    | 0.83 | 7.99   | 11.86   | 16.13   | 22.78   |
| 0.43 | 1963.70    | 3412.47    | 5454.39    | 8908.76     | 0.84 | 6.76   | 9.93    | 13.50   | 18.90   |
| 0.44 | 1707.98    | 2973.05    | 4713.39    | 7717.11     | 0.85 | 5.69   | 8.33    | 11.28   | 15.66   |
| 0.45 | 1486.03    | 2605.46    | 4106.56    | 6742.50     | 0.86 | 4.81   | 6.91    | 9.33    | 12.90   |
| 0.46 | 1295.15    | 2243.82    | 3543.99    | 5933.10     | 0.87 | 4.02   | 5.75    | 7.67    | 10.60   |
| 0.47 | 1126.63    | 1960.20    | 3100.64    | 5161.12     | 0.88 | 3.34   | 4.73    | 6.33    | 8.64    |
| 0.48 | 982.16     | 1717.04    | 2688.40    | 4484.41     | 0.89 | 2.77   | 3.90    | 5.16    | 6.99    |
| 0.49 | 857.26     | 1497.17    | 2337.99    | 3923.17     | 0.90 | 2.30   | 3.19    | 4.15    | 5.60    |
| 0.50 | 751.03     | 1294.20    | 2047.64    | 3405.01     |      |        |         |         |         |

Table S347: Critical values for detector  $\hat{H}_{mov,sn}^{m,0.3}$  with windows size  $n = 0.3$ , and IM-OLS estimation in a model with intercept. The number of integrated regressors is 2 and the highest power of  $x_{kt}$  is 1.

| m    | 90 %       | 95 %        | 97,5 %      | 99 %        | m    | 90 %   | 95 %   | 97,5 %  | 99 %    |
|------|------------|-------------|-------------|-------------|------|--------|--------|---------|---------|
| 0.10 | 9614772.71 | 16042889.03 | 24240476.97 | 39040037.94 | 0.51 | 454.06 | 745.57 | 1140.73 | 1802.97 |
| 0.11 | 5620146.86 | 9234880.40  | 14084875.67 | 22761320.66 | 0.52 | 388.12 | 642.26 | 976.02  | 1562.60 |
| 0.12 | 3486697.46 | 5728718.71  | 8794228.68  | 13815609.85 | 0.53 | 334.35 | 552.12 | 831.64  | 1316.34 |
| 0.13 | 2203891.26 | 3678365.35  | 5592169.58  | 8958728.58  | 0.54 | 291.15 | 471.26 | 711.51  | 1139.16 |
| 0.14 | 1467874.65 | 2417007.79  | 3690016.01  | 5871574.55  | 0.55 | 249.17 | 408.96 | 620.66  | 972.68  |
| 0.15 | 992026.08  | 1626907.46  | 2521532.63  | 3900782.76  | 0.56 | 215.65 | 354.17 | 527.10  | 841.50  |
| 0.16 | 682070.30  | 1126560.61  | 1724280.82  | 2750790.01  | 0.57 | 187.55 | 303.74 | 460.78  | 723.32  |
| 0.17 | 476979.86  | 797340.80   | 1233105.96  | 1968170.93  | 0.58 | 162.14 | 265.83 | 401.31  | 625.43  |
| 0.18 | 343731.04  | 574195.13   | 868096.08   | 1411845.59  | 0.59 | 141.39 | 230.33 | 343.45  | 538.44  |
| 0.19 | 251762.81  | 418594.58   | 632806.73   | 1019984.23  | 0.60 | 122.10 | 198.64 | 298.75  | 470.88  |
| 0.20 | 185281.94  | 309019.98   | 469996.00   | 759001.12   | 0.61 | 106.08 | 173.15 | 256.67  | 403.99  |
| 0.21 | 140257.33  | 232106.65   | 349414.61   | 561762.86   | 0.62 | 92.16  | 148.32 | 223.77  | 344.73  |
| 0.22 | 105195.42  | 175141.09   | 269998.39   | 433545.84   | 0.63 | 80.01  | 129.09 | 193.39  | 298.91  |
| 0.23 | 81484.85   | 135620.09   | 209138.12   | 337820.10   | 0.64 | 69.57  | 111.15 | 166.16  | 259.67  |
| 0.24 | 63473.22   | 105516.92   | 160535.60   | 261204.72   | 0.65 | 60.21  | 96.27  | 142.46  | 224.72  |
| 0.25 | 49374.95   | 82421.25    | 125534.13   | 203158.07   | 0.66 | 52.53  | 83.31  | 124.15  | 195.68  |
| 0.26 | 39148.59   | 65224.78    | 98506.07    | 158437.01   | 0.67 | 45.67  | 72.29  | 107.22  | 167.99  |
| 0.27 | 31075.28   | 51846.52    | 78523.26    | 124110.40   | 0.68 | 39.18  | 63.03  | 92.23   | 142.10  |
| 0.28 | 24643.20   | 40936.83    | 62757.43    | 101746.66   | 0.69 | 34.19  | 54.88  | 79.68   | 121.80  |
| 0.29 | 19911.01   | 33204.89    | 50711.07    | 82718.47    | 0.70 | 29.70  | 47.33  | 68.98   | 106.14  |
| 0.30 | 16247.26   | 26816.48    | 41637.09    | 67791.16    | 0.71 | 25.63  | 40.76  | 59.30   | 89.64   |
| 0.31 | 13175.08   | 21772.38    | 33817.19    | 54794.95    | 0.72 | 22.12  | 34.88  | 51.45   | 77.42   |
| 0.32 | 10783.16   | 17840.89    | 27472.75    | 45402.23    | 0.73 | 18.94  | 29.85  | 43.41   | 66.24   |
| 0.33 | 8895.58    | 14644.66    | 22550.76    | 37247.10    | 0.74 | 16.18  | 25.66  | 37.21   | 55.67   |
| 0.34 | 7413.22    | 12260.38    | 18817.96    | 30709.90    | 0.75 | 13.91  | 21.63  | 31.39   | 47.70   |
| 0.35 | 6065.69    | 10024.46    | 15454.10    | 25085.91    | 0.76 | 11.81  | 18.54  | 26.79   | 40.66   |
| 0.36 | 5107.68    | 8362.28     | 12803.10    | 20985.07    | 0.77 | 10.13  | 15.85  | 22.76   | 34.62   |
| 0.37 | 4260.98    | 7034.17     | 10764.83    | 17608.57    | 0.78 | 8.66   | 13.47  | 19.27   | 28.75   |
| 0.38 | 3580.85    | 5841.65     | 8934.94     | 14820.77    | 0.79 | 7.32   | 11.36  | 16.23   | 24.02   |
| 0.39 | 3006.11    | 4961.59     | 7492.77     | 12338.46    | 0.80 | 6.15   | 9.50   | 13.63   | 20.04   |
| 0.40 | 2536.58    | 4209.90     | 6416.80     | 10123.49    | 0.81 | 5.15   | 8.00   | 11.38   | 16.62   |
| 0.41 | 2144.19    | 3565.96     | 5446.39     | 8597.47     | 0.82 | 4.31   | 6.63   | 9.38    | 14.05   |
| 0.42 | 1833.79    | 3025.63     | 4653.04     | 7385.59     | 0.83 | 3.61   | 5.48   | 7.78    | 11.39   |
| 0.43 | 1568.73    | 2563.62     | 3937.82     | 6235.61     | 0.84 | 2.98   | 4.55   | 6.43    | 9.26    |
| 0.44 | 1332.22    | 2188.52     | 3332.43     | 5374.63     | 0.85 | 2.44   | 3.72   | 5.23    | 7.68    |
| 0.45 | 1146.09    | 1870.57     | 2823.57     | 4513.22     | 0.86 | 1.97   | 3.02   | 4.25    | 6.21    |
| 0.46 | 969.13     | 1606.08     | 2429.37     | 3839.02     | 0.87 | 1.59   | 2.42   | 3.40    | 4.87    |
| 0.47 | 830.27     | 1380.61     | 2076.08     | 3249.36     | 0.88 | 1.27   | 1.90   | 2.65    | 3.84    |
| 0.48 | 711.69     | 1184.49     | 1781.64     | 2788.74     | 0.89 | 0.98   | 1.47   | 2.07    | 2.97    |
| 0.49 | 607.37     | 1013.18     | 1535.33     | 2395.57     | 0.90 | 0.75   | 1.12   | 1.56    | 2.25    |
| 0.50 | 523.45     | 871.54      | 1330.70     | 2077.33     |      |        |        |         |         |

Table S348: Critical values for detector  $\hat{H}_{mov,sn}^{m,0.1}$  with windows size  $n = 0.1$ , and FM-OLS and D-OLS estimation in a model with intercept and linear trend. The number of integrated regressors is 2 and the highest power of  $x_{kt}$  is 1.

| m    | 90 %        | 95 %        | 97,5 %      | 99 %         | m    | 90 %    | 95 %    | 97,5 %  | 99 %    |
|------|-------------|-------------|-------------|--------------|------|---------|---------|---------|---------|
| 0.10 | 31147825.37 | 52342168.76 | 80367801.34 | 129960204.56 | 0.51 | 1422.18 | 2342.76 | 3616.42 | 5637.01 |
| 0.11 | 18296198.88 | 30450112.22 | 46762626.16 | 76964867.35  | 0.52 | 1221.46 | 2024.88 | 3102.23 | 4834.24 |
| 0.12 | 11187520.31 | 18639422.38 | 28499370.63 | 45678936.65  | 0.53 | 1058.05 | 1754.56 | 2647.65 | 4179.00 |
| 0.13 | 7075381.38  | 11766556.61 | 17918240.71 | 28309333.10  | 0.54 | 908.50  | 1511.44 | 2272.72 | 3594.18 |
| 0.14 | 4637317.74  | 7778507.26  | 11746732.28 | 18596675.11  | 0.55 | 787.61  | 1304.16 | 1944.72 | 3134.92 |
| 0.15 | 3137653.66  | 5225955.81  | 7850505.35  | 12677097.16  | 0.56 | 678.66  | 1117.42 | 1699.10 | 2724.83 |
| 0.16 | 2164038.61  | 3624102.86  | 5489277.74  | 8664084.50   | 0.57 | 588.94  | 973.19  | 1486.56 | 2348.87 |
| 0.17 | 1521489.80  | 2550396.78  | 3911060.55  | 6206286.13   | 0.58 | 508.10  | 846.46  | 1283.83 | 2031.48 |
| 0.18 | 1090142.28  | 1840414.12  | 2834574.02  | 4493289.43   | 0.59 | 439.31  | 733.31  | 1108.93 | 1744.62 |
| 0.19 | 794202.88   | 1340845.17  | 2069731.13  | 3329625.51   | 0.60 | 383.80  | 634.28  | 949.59  | 1499.12 |
| 0.20 | 590459.85   | 989449.89   | 1523775.96  | 2495663.57   | 0.61 | 332.66  | 544.78  | 818.61  | 1282.91 |
| 0.21 | 443693.43   | 739566.47   | 1145966.75  | 1859429.46   | 0.62 | 286.69  | 471.70  | 706.98  | 1107.57 |
| 0.22 | 337286.27   | 564930.69   | 861954.08   | 1428979.84   | 0.63 | 250.45  | 407.29  | 605.76  | 962.64  |
| 0.23 | 260735.39   | 437669.89   | 663376.58   | 1085245.87   | 0.64 | 217.71  | 349.05  | 525.14  | 825.00  |
| 0.24 | 202063.04   | 340949.98   | 521345.93   | 840161.38    | 0.65 | 189.63  | 303.68  | 453.81  | 717.19  |
| 0.25 | 157106.05   | 264926.90   | 408661.92   | 653695.79    | 0.66 | 163.99  | 264.02  | 395.46  | 618.99  |
| 0.26 | 124110.65   | 208777.42   | 318815.58   | 518230.18    | 0.67 | 142.27  | 229.87  | 342.78  | 531.20  |
| 0.27 | 98527.46    | 165217.25   | 252597.14   | 409557.00    | 0.68 | 123.11  | 198.92  | 296.18  | 454.09  |
| 0.28 | 79116.03    | 132348.55   | 201936.20   | 327334.36    | 0.69 | 106.51  | 171.54  | 254.52  | 391.65  |
| 0.29 | 63634.68    | 106755.09   | 162430.05   | 261015.94    | 0.70 | 92.69   | 148.06  | 219.85  | 333.91  |
| 0.30 | 51494.74    | 86789.13    | 132458.28   | 214865.35    | 0.71 | 79.75   | 127.96  | 187.14  | 284.93  |
| 0.31 | 41707.16    | 70218.62    | 107690.48   | 173773.47    | 0.72 | 68.62   | 109.52  | 159.43  | 245.97  |
| 0.32 | 34161.55    | 57261.47    | 88617.02    | 143482.06    | 0.73 | 59.28   | 93.05   | 136.50  | 213.53  |
| 0.33 | 27902.56    | 47089.76    | 73623.67    | 118175.40    | 0.74 | 50.89   | 79.16   | 117.10  | 181.68  |
| 0.34 | 23171.21    | 38976.48    | 60685.13    | 98802.70     | 0.75 | 43.59   | 67.88   | 99.73   | 153.42  |
| 0.35 | 19330.98    | 32413.27    | 50124.08    | 83097.75     | 0.76 | 37.47   | 58.19   | 84.01   | 127.43  |
| 0.36 | 16048.80    | 26838.36    | 41812.76    | 68384.33     | 0.77 | 32.03   | 49.73   | 70.90   | 107.10  |
| 0.37 | 13439.24    | 22576.09    | 35140.44    | 56637.13     | 0.78 | 27.30   | 42.37   | 59.95   | 88.96   |
| 0.38 | 11206.83    | 18963.95    | 29076.79    | 48025.26     | 0.79 | 23.20   | 35.62   | 50.81   | 74.09   |
| 0.39 | 9442.94     | 15778.71    | 24459.03    | 40553.11     | 0.80 | 19.71   | 30.05   | 42.95   | 62.77   |
| 0.40 | 7926.76     | 13294.22    | 20634.90    | 33720.13     | 0.81 | 16.70   | 25.24   | 35.81   | 51.71   |
| 0.41 | 6707.76     | 11272.08    | 17396.02    | 28229.49     | 0.82 | 14.09   | 21.26   | 29.91   | 43.33   |
| 0.42 | 5695.22     | 9593.01     | 14743.00    | 23723.85     | 0.83 | 11.83   | 17.80   | 24.80   | 36.15   |
| 0.43 | 4840.00     | 8150.47     | 12479.17    | 20059.86     | 0.84 | 9.87    | 14.76   | 20.63   | 29.53   |
| 0.44 | 4146.42     | 6910.40     | 10603.87    | 16916.01     | 0.85 | 8.21    | 12.20   | 17.06   | 24.25   |
| 0.45 | 3559.59     | 5940.46     | 9059.21     | 14506.89     | 0.86 | 6.81    | 10.03   | 13.89   | 19.66   |
| 0.46 | 3041.33     | 5096.03     | 7717.68     | 12471.34     | 0.87 | 5.59    | 8.23    | 11.28   | 15.78   |
| 0.47 | 2623.66     | 4350.24     | 6582.17     | 10486.65     | 0.88 | 4.55    | 6.66    | 9.02    | 12.59   |
| 0.48 | 2240.38     | 3741.66     | 5645.38     | 8896.81      | 0.89 | 3.67    | 5.33    | 7.13    | 9.89    |
| 0.49 | 1937.14     | 3206.87     | 4844.78     | 7697.19      | 0.90 | 2.92    | 4.20    | 5.62    | 7.67    |
| 0.50 | 1655.17     | 2725.39     | 4164.73     | 6579.66      |      |         |         |         |         |

Table S349: Critical values for detector  $\hat{H}_{mov,sn}^{m,0.1}$  with windows size  $n = 0.1$ , and IM-OLS estimation in a model with intercept and linear trend. The number of integrated regressors is 2 and the highest power of  $x_{kt}$  is 1.

| m    | 90 %        | 95 %        | 97,5 %      | 99 %        | m    | 90 %   | 95 %    | 97,5 %  | 99 %    |
|------|-------------|-------------|-------------|-------------|------|--------|---------|---------|---------|
| 0.10 | 13249388.95 | 22114268.96 | 33674916.38 | 55143902.78 | 0.51 | 657.63 | 1076.46 | 1651.91 | 2621.51 |
| 0.11 | 7806647.79  | 13063349.30 | 19920927.70 | 32307857.02 | 0.52 | 558.90 | 926.39  | 1402.38 | 2263.90 |
| 0.12 | 4913968.67  | 8151032.76  | 12586802.83 | 19829681.05 | 0.53 | 479.70 | 792.09  | 1190.57 | 1887.31 |
| 0.13 | 3138477.74  | 5275930.30  | 8072644.24  | 13010448.47 | 0.54 | 416.88 | 677.30  | 1014.21 | 1632.16 |
| 0.14 | 2094401.98  | 3515799.68  | 5364718.78  | 8610473.64  | 0.55 | 354.56 | 581.47  | 877.70  | 1388.39 |
| 0.15 | 1431767.81  | 2375355.65  | 3693027.81  | 5807929.65  | 0.56 | 304.81 | 500.65  | 744.28  | 1184.59 |
| 0.16 | 992121.44   | 1651048.03  | 2548311.89  | 4072380.13  | 0.57 | 264.01 | 426.67  | 647.89  | 1016.73 |
| 0.17 | 697649.51   | 1177581.54  | 1823623.00  | 2963046.66  | 0.58 | 228.00 | 372.05  | 562.89  | 880.63  |
| 0.18 | 503213.72   | 852830.44   | 1294526.44  | 2120687.93  | 0.59 | 197.81 | 320.84  | 475.75  | 744.53  |
| 0.19 | 370546.54   | 620446.56   | 950969.36   | 1530978.82  | 0.60 | 169.47 | 275.71  | 413.45  | 649.63  |
| 0.20 | 274860.50   | 459830.89   | 707793.37   | 1152774.20  | 0.61 | 146.17 | 239.37  | 352.07  | 546.14  |
| 0.21 | 208680.49   | 348172.77   | 529752.27   | 851608.49   | 0.62 | 126.45 | 204.29  | 306.77  | 469.48  |
| 0.22 | 156784.47   | 263340.38   | 407177.41   | 659054.80   | 0.63 | 108.92 | 176.66  | 262.45  | 405.29  |
| 0.23 | 121599.69   | 204056.79   | 317016.74   | 512843.29   | 0.64 | 93.78  | 150.41  | 224.64  | 350.30  |
| 0.24 | 95090.43    | 159212.10   | 244131.06   | 397099.80   | 0.65 | 80.84  | 129.50  | 191.36  | 297.52  |
| 0.25 | 73896.14    | 124348.62   | 191955.12   | 310600.28   | 0.66 | 69.92  | 110.94  | 165.39  | 258.86  |
| 0.26 | 58749.62    | 98919.95    | 149255.30   | 242333.60   | 0.67 | 60.45  | 95.50   | 141.70  | 220.42  |
| 0.27 | 46688.56    | 78353.33    | 119626.31   | 189730.26   | 0.68 | 51.67  | 82.57   | 121.29  | 185.43  |
| 0.28 | 37150.28    | 61945.92    | 95739.84    | 155731.91   | 0.69 | 44.44  | 71.35   | 103.36  | 156.86  |
| 0.29 | 29960.31    | 50311.87    | 77175.26    | 126323.41   | 0.70 | 38.36  | 60.97   | 88.91   | 135.92  |
| 0.30 | 24443.14    | 40631.71    | 63376.00    | 103889.15   | 0.71 | 32.76  | 52.13   | 75.67   | 113.23  |
| 0.31 | 19784.43    | 32945.76    | 51769.71    | 83774.01    | 0.72 | 28.02  | 44.28   | 64.87   | 97.07   |
| 0.32 | 16236.28    | 26974.40    | 41710.48    | 69123.18    | 0.73 | 23.76  | 37.38   | 54.19   | 82.46   |
| 0.33 | 13386.49    | 22153.49    | 34176.61    | 56955.14    | 0.74 | 20.04  | 31.89   | 45.61   | 68.62   |
| 0.34 | 11093.68    | 18503.68    | 28426.35    | 46823.66    | 0.75 | 17.09  | 26.45   | 38.08   | 58.30   |
| 0.35 | 9099.04     | 15148.07    | 23327.74    | 38244.30    | 0.76 | 14.32  | 22.49   | 32.07   | 48.58   |
| 0.36 | 7663.40     | 12609.76    | 19386.33    | 31612.31    | 0.77 | 12.07  | 18.88   | 27.12   | 40.84   |
| 0.37 | 6378.22     | 10607.33    | 16244.56    | 26606.67    | 0.78 | 10.18  | 15.81   | 22.54   | 33.49   |
| 0.38 | 5329.12     | 8790.60     | 13417.01    | 22456.08    | 0.79 | 8.46   | 13.10   | 18.65   | 27.50   |
| 0.39 | 4486.62     | 7423.41     | 11248.21    | 18562.48    | 0.80 | 7.02   | 10.80   | 15.43   | 22.48   |
| 0.40 | 3777.05     | 6289.06     | 9635.72     | 15292.82    | 0.81 | 5.78   | 8.93    | 12.70   | 18.43   |
| 0.41 | 3182.40     | 5339.02     | 8142.76     | 12864.89    | 0.82 | 4.77   | 7.26    | 10.26   | 15.33   |
| 0.42 | 2719.55     | 4507.71     | 6942.06     | 11047.48    | 0.83 | 3.93   | 5.94    | 8.41    | 12.30   |
| 0.43 | 2320.49     | 3810.45     | 5858.98     | 9356.96     | 0.84 | 3.20   | 4.88    | 6.82    | 9.81    |
| 0.44 | 1963.30     | 3231.20     | 4956.98     | 7973.77     | 0.85 | 2.60   | 3.93    | 5.48    | 8.07    |
| 0.45 | 1684.76     | 2757.05     | 4202.99     | 6703.84     | 0.86 | 2.09   | 3.17    | 4.43    | 6.44    |
| 0.46 | 1420.07     | 2366.42     | 3572.99     | 5649.91     | 0.87 | 1.69   | 2.52    | 3.51    | 5.02    |
| 0.47 | 1217.88     | 2026.24     | 3050.71     | 4796.31     | 0.88 | 1.35   | 1.98    | 2.74    | 3.92    |
| 0.48 | 1036.81     | 1734.53     | 2603.60     | 4089.89     | 0.89 | 1.08   | 1.56    | 2.16    | 3.07    |
| 0.49 | 882.70      | 1471.45     | 2238.37     | 3496.61     | 0.90 | 0.90   | 1.22    | 1.66    | 2.34    |
| 0.50 | 757.57      | 1265.43     | 1923.96     | 3028.26     |      |        |         |         |         |

Table S350: Critical values for detector  $\hat{H}_{mov,sn}^{m,0.2}$  with windows size  $n = 0.2$ , and FM-OLS and D-OLS estimation in a model with intercept and linear trend. The number of integrated regressors is 2 and the highest power of  $x_{kt}$  is 1.

| m    | 90 %        | 95 %        | 97,5 %       | 99 %         | m    | 90 %    | 95 %    | 97,5 %  | 99 %    |
|------|-------------|-------------|--------------|--------------|------|---------|---------|---------|---------|
| 0.10 | 42992357.69 | 72189090.38 | 112327498.86 | 182828077.71 | 0.51 | 2055.84 | 3402.50 | 5233.54 | 8169.62 |
| 0.11 | 25379540.54 | 42857772.47 | 66326623.48  | 110208542.32 | 0.52 | 1759.38 | 2919.35 | 4468.14 | 6981.95 |
| 0.12 | 15627275.32 | 26405405.76 | 40634898.01  | 66487339.04  | 0.53 | 1523.47 | 2519.31 | 3800.74 | 5977.96 |
| 0.13 | 10022279.94 | 16807798.24 | 25875245.28  | 40948516.09  | 0.54 | 1303.29 | 2163.73 | 3241.44 | 5145.66 |
| 0.14 | 6633967.73  | 11215695.94 | 17127261.39  | 27272364.07  | 0.55 | 1122.34 | 1852.02 | 2769.26 | 4447.49 |
| 0.15 | 4500647.44  | 7603116.32  | 11569263.84  | 18533164.22  | 0.56 | 965.26  | 1587.90 | 2395.18 | 3853.34 |
| 0.16 | 3139671.67  | 5308928.41  | 8127536.05   | 12818689.09  | 0.57 | 833.27  | 1371.16 | 2091.89 | 3319.54 |
| 0.17 | 2214587.54  | 3758146.54  | 5811096.77   | 9269622.57   | 0.58 | 716.43  | 1187.97 | 1802.38 | 2845.87 |
| 0.18 | 1598021.94  | 2719972.74  | 4240643.17   | 6779044.34   | 0.59 | 614.19  | 1026.68 | 1544.09 | 2419.55 |
| 0.19 | 1170811.27  | 1994603.02  | 3088886.81   | 5046317.24   | 0.60 | 532.00  | 883.84  | 1320.13 | 2058.90 |
| 0.20 | 871925.64   | 1478975.36  | 2307086.32   | 3784972.20   | 0.61 | 462.20  | 756.57  | 1120.90 | 1768.18 |
| 0.21 | 660879.23   | 1111040.28  | 1734343.53   | 2824606.24   | 0.62 | 395.34  | 646.35  | 967.00  | 1504.68 |
| 0.22 | 501255.88   | 849147.34   | 1312638.73   | 2176412.38   | 0.63 | 341.86  | 556.22  | 826.04  | 1293.64 |
| 0.23 | 390368.91   | 658805.76   | 1004015.25   | 1650282.20   | 0.64 | 296.90  | 475.94  | 710.03  | 1113.80 |
| 0.24 | 300807.32   | 513491.56   | 786655.72    | 1286952.56   | 0.65 | 255.71  | 408.67  | 612.44  | 952.10  |
| 0.25 | 235647.03   | 400611.96   | 620689.41    | 995703.16    | 0.66 | 221.02  | 354.10  | 527.68  | 814.67  |
| 0.26 | 186166.85   | 316960.32   | 483513.10    | 792373.71    | 0.67 | 190.65  | 306.03  | 452.53  | 702.31  |
| 0.27 | 147802.30   | 250301.09   | 384397.55    | 625018.03    | 0.68 | 163.66  | 261.41  | 389.26  | 596.44  |
| 0.28 | 118519.24   | 200392.48   | 308630.19    | 498705.29    | 0.69 | 140.27  | 224.42  | 331.35  | 504.97  |
| 0.29 | 95732.90    | 161990.66   | 246385.42    | 400723.79    | 0.70 | 120.94  | 192.06  | 284.43  | 430.24  |
| 0.30 | 77629.53    | 131310.21   | 201935.01    | 328498.58    | 0.71 | 103.48  | 164.35  | 240.86  | 362.04  |
| 0.31 | 62798.93    | 106181.99   | 163568.51    | 265011.81    | 0.72 | 88.35   | 139.79  | 202.35  | 311.52  |
| 0.32 | 51305.85    | 86705.46    | 135389.91    | 219046.60    | 0.73 | 75.58   | 118.01  | 171.30  | 263.51  |
| 0.33 | 41975.85    | 71361.89    | 111637.76    | 179761.13    | 0.74 | 64.03   | 99.53   | 145.07  | 223.07  |
| 0.34 | 34701.03    | 58966.63    | 92191.19     | 151052.47    | 0.75 | 54.37   | 84.11   | 123.14  | 187.16  |
| 0.35 | 29026.90    | 48961.71    | 75844.20     | 125998.89    | 0.76 | 46.21   | 71.28   | 102.62  | 154.23  |
| 0.36 | 24056.26    | 40419.82    | 63300.42     | 103651.79    | 0.77 | 39.05   | 59.98   | 85.24   | 127.48  |
| 0.37 | 20118.11    | 33965.06    | 52951.94     | 85389.90     | 0.78 | 32.84   | 50.64   | 71.18   | 104.44  |
| 0.38 | 16742.81    | 28479.39    | 43754.54     | 72283.02     | 0.79 | 27.56   | 42.07   | 59.38   | 85.69   |
| 0.39 | 14105.46    | 23756.19    | 36723.06     | 61229.65     | 0.80 | 23.14   | 34.92   | 49.32   | 71.68   |
| 0.40 | 11844.98    | 19927.17    | 31089.90     | 50688.26     | 0.81 | 19.33   | 29.04   | 40.64   | 58.48   |
| 0.41 | 9979.80     | 16834.37    | 26101.59     | 42605.69     | 0.82 | 16.05   | 24.00   | 33.38   | 48.06   |
| 0.42 | 8430.37     | 14310.63    | 21995.93     | 35510.53     | 0.83 | 13.28   | 19.77   | 27.26   | 39.84   |
| 0.43 | 7174.99     | 12144.97    | 18592.45     | 30103.65     | 0.84 | 10.86   | 16.17   | 22.44   | 32.14   |
| 0.44 | 6136.49     | 10272.18    | 15706.24     | 25263.99     | 0.85 | 8.96    | 13.19   | 18.26   | 25.83   |
| 0.45 | 5241.13     | 8802.46     | 13388.78     | 21537.28     | 0.86 | 7.30    | 10.68   | 14.74   | 20.65   |
| 0.46 | 4477.62     | 7496.69     | 11452.46     | 18505.45     | 0.87 | 5.92    | 8.67    | 11.82   | 16.43   |
| 0.47 | 3832.10     | 6405.13     | 9683.27      | 15504.36     | 0.88 | 4.79    | 6.92    | 9.35    | 12.85   |
| 0.48 | 3275.98     | 5475.82     | 8307.24      | 12996.83     | 0.89 | 3.83    | 5.50    | 7.32    | 10.10   |
| 0.49 | 2813.47     | 4688.85     | 7104.33      | 11199.55     | 0.90 | 3.05    | 4.33    | 5.76    | 7.81    |
| 0.50 | 2397.54     | 3983.49     | 6037.59      | 9595.99      |      |         |         |         |         |

Table S351: Critical values for detector  $\hat{H}_{mov,sn}^{m,0.2}$  with windows size  $n = 0.2$ , and IM-OLS estimation in a model with intercept and linear trend. The number of integrated regressors is 2 and the highest power of  $x_{kt}$  is 1.



| m    | 90 %        | 95 %        | 97,5 %      | 99 %        | m    | 90 %   | 95 %    | 97,5 %  | 99 %    |
|------|-------------|-------------|-------------|-------------|------|--------|---------|---------|---------|
| 0.10 | 15005579.24 | 25341485.43 | 38547273.95 | 62909374.94 | 0.51 | 732.70 | 1195.79 | 1827.98 | 2898.83 |
| 0.11 | 8908296.43  | 14934268.11 | 22944784.60 | 37148698.98 | 0.52 | 619.22 | 1025.11 | 1554.62 | 2504.21 |
| 0.12 | 5645271.44  | 9335425.89  | 14494610.42 | 22877226.56 | 0.53 | 529.68 | 877.98  | 1315.27 | 2085.82 |
| 0.13 | 3601280.83  | 6111817.97  | 9362049.58  | 15131500.25 | 0.54 | 459.96 | 748.01  | 1113.61 | 1778.63 |
| 0.14 | 2412593.34  | 4061271.39  | 6207601.23  | 10041028.33 | 0.55 | 389.71 | 637.56  | 959.29  | 1521.43 |
| 0.15 | 1648962.72  | 2749159.37  | 4281440.83  | 6816114.75  | 0.56 | 332.91 | 548.06  | 814.55  | 1288.71 |
| 0.16 | 1146610.74  | 1912400.56  | 2972798.83  | 4780644.69  | 0.57 | 288.08 | 465.05  | 702.70  | 1107.06 |
| 0.17 | 806401.11   | 1371099.47  | 2134916.31  | 3461595.41  | 0.58 | 248.91 | 404.81  | 609.19  | 951.57  |
| 0.18 | 584608.50   | 995381.49   | 1516853.77  | 2489529.65  | 0.59 | 213.85 | 348.43  | 512.92  | 804.44  |
| 0.19 | 430715.32   | 723034.95   | 1116283.74  | 1799380.99  | 0.60 | 182.84 | 296.98  | 444.27  | 696.50  |
| 0.20 | 319457.58   | 535126.92   | 831049.06   | 1364229.08  | 0.61 | 157.33 | 256.38  | 376.16  | 583.07  |
| 0.21 | 242235.84   | 405185.49   | 621443.39   | 999820.31   | 0.62 | 135.74 | 217.30  | 327.51  | 495.01  |
| 0.22 | 182601.00   | 308690.50   | 475981.19   | 774924.22   | 0.63 | 116.13 | 187.75  | 278.87  | 429.67  |
| 0.23 | 141269.02   | 238535.88   | 371766.87   | 605712.10   | 0.64 | 99.55  | 158.99  | 236.86  | 366.65  |
| 0.24 | 110244.61   | 186295.25   | 286957.30   | 468243.91   | 0.65 | 85.37  | 136.60  | 201.58  | 313.07  |
| 0.25 | 85972.45    | 145395.63   | 224719.78   | 365831.38   | 0.66 | 73.26  | 116.66  | 172.89  | 269.94  |
| 0.26 | 68177.67    | 115588.20   | 174751.16   | 285417.01   | 0.67 | 63.13  | 99.69   | 147.59  | 227.56  |
| 0.27 | 54191.84    | 91472.58    | 140266.29   | 222936.16   | 0.68 | 53.77  | 85.51   | 125.43  | 191.99  |
| 0.28 | 43136.50    | 72167.61    | 111930.12   | 183236.10   | 0.69 | 46.06  | 73.80   | 106.31  | 161.31  |
| 0.29 | 34773.13    | 58663.90    | 90484.59    | 147856.78   | 0.70 | 39.45  | 62.80   | 91.30   | 139.41  |
| 0.30 | 28324.20    | 47227.72    | 74178.57    | 121604.52   | 0.71 | 33.61  | 53.34   | 77.10   | 115.49  |
| 0.31 | 22923.62    | 38283.52    | 60301.94    | 97977.57    | 0.72 | 28.61  | 45.16   | 66.06   | 98.59   |
| 0.32 | 18773.74    | 31367.19    | 48563.17    | 80421.04    | 0.73 | 24.17  | 37.91   | 55.05   | 83.39   |
| 0.33 | 15455.79    | 25763.26    | 39806.36    | 66097.41    | 0.74 | 20.32  | 32.25   | 46.11   | 69.22   |
| 0.34 | 12836.20    | 21464.57    | 33029.66    | 54261.77    | 0.75 | 17.30  | 26.72   | 38.34   | 58.75   |
| 0.35 | 10508.14    | 17505.98    | 27007.18    | 44221.50    | 0.76 | 14.48  | 22.65   | 32.30   | 48.85   |
| 0.36 | 8820.64     | 14575.25    | 22453.57    | 36615.03    | 0.77 | 12.18  | 18.98   | 27.26   | 41.01   |
| 0.37 | 7336.20     | 12217.19    | 18713.90    | 30536.93    | 0.78 | 10.29  | 15.91   | 22.67   | 33.54   |
| 0.38 | 6114.81     | 10121.82    | 15474.73    | 25842.58    | 0.79 | 8.56   | 13.20   | 18.76   | 27.58   |
| 0.39 | 5141.89     | 8534.31     | 12911.21    | 21299.77    | 0.80 | 7.12   | 10.91   | 15.55   | 22.59   |
| 0.40 | 4309.51     | 7206.04     | 11024.92    | 17533.14    | 0.81 | 5.90   | 9.04    | 12.81   | 18.53   |
| 0.41 | 3633.07     | 6088.02     | 9293.21     | 14677.02    | 0.82 | 4.89   | 7.39    | 10.36   | 15.45   |
| 0.42 | 3096.70     | 5129.30     | 7903.22     | 12664.69    | 0.83 | 4.05   | 6.07    | 8.53    | 12.42   |
| 0.43 | 2637.55     | 4338.20     | 6656.48     | 10655.32    | 0.84 | 3.33   | 5.00    | 6.94    | 9.90    |
| 0.44 | 2224.16     | 3676.01     | 5626.48     | 9029.04     | 0.85 | 2.72   | 4.05    | 5.60    | 8.20    |
| 0.45 | 1905.86     | 3125.20     | 4758.00     | 7586.31     | 0.86 | 2.22   | 3.29    | 4.55    | 6.54    |
| 0.46 | 1603.42     | 2673.00     | 4025.86     | 6390.95     | 0.87 | 1.81   | 2.65    | 3.64    | 5.16    |
| 0.47 | 1369.78     | 2280.76     | 3437.64     | 5410.76     | 0.88 | 1.48   | 2.12    | 2.86    | 4.04    |
| 0.48 | 1164.31     | 1944.45     | 2922.89     | 4602.00     | 0.89 | 1.22   | 1.68    | 2.28    | 3.19    |
| 0.49 | 989.20      | 1647.87     | 2500.82     | 3919.46     | 0.90 | 1.06   | 1.35    | 1.78    | 2.46    |
| 0.50 | 847.19      | 1411.12     | 2149.66     | 3378.26     |      |        |         |         |         |

Table S352: Critical values for detector  $\hat{H}_{mov,sn}^{m,0.3}$  with windows size  $n = 0.3$ , and FM-OLS and D-OLS estimation in a model with intercept and linear trend. The number of integrated regressors is 2 and the highest power of  $x_{kt}$  is 1.

| m    | 90 %        | 95 %        | 97,5 %       | 99 %         | m    | 90 %    | 95 %    | 97,5 %  | 99 %    |
|------|-------------|-------------|--------------|--------------|------|---------|---------|---------|---------|
| 0.10 | 48522884.76 | 82522513.52 | 128252196.56 | 211997693.30 | 0.51 | 2289.68 | 3783.52 | 5823.25 | 9076.11 |
| 0.11 | 28935455.65 | 48855194.03 | 76400542.16  | 126142096.06 | 0.52 | 1960.47 | 3239.03 | 4945.38 | 7736.89 |
| 0.12 | 17831679.36 | 30343313.76 | 46877137.48  | 76655268.81  | 0.53 | 1686.28 | 2783.34 | 4195.12 | 6600.99 |
| 0.13 | 11466065.44 | 19355269.47 | 29944035.32  | 47677727.34  | 0.54 | 1440.06 | 2378.35 | 3569.37 | 5649.71 |
| 0.14 | 7634054.15  | 12955457.07 | 19844976.23  | 32049648.56  | 0.55 | 1235.99 | 2028.71 | 3035.83 | 4862.81 |
| 0.15 | 5198697.19  | 8835879.44  | 13450856.80  | 21689043.26  | 0.56 | 1058.26 | 1741.95 | 2617.15 | 4190.70 |
| 0.16 | 3627267.65  | 6163302.16  | 9469164.66   | 15010641.52  | 0.57 | 910.71  | 1496.26 | 2272.32 | 3601.41 |
| 0.17 | 2560649.95  | 4362279.67  | 6786981.39   | 10843772.43  | 0.58 | 781.18  | 1289.58 | 1955.75 | 3070.52 |
| 0.18 | 1852017.66  | 3166720.17  | 4952844.54   | 7981024.62   | 0.59 | 668.37  | 1111.07 | 1668.33 | 2598.59 |
| 0.19 | 1353626.90  | 2321937.08  | 3608753.18   | 5927733.25   | 0.60 | 576.22  | 950.02  | 1416.04 | 2227.17 |
| 0.20 | 1011490.06  | 1728921.13  | 2698182.15   | 4457979.97   | 0.61 | 498.07  | 810.32  | 1200.15 | 1889.63 |
| 0.21 | 770057.31   | 1299499.87  | 2026135.20   | 3322620.39   | 0.62 | 424.92  | 690.58  | 1031.64 | 1593.90 |
| 0.22 | 582138.29   | 993201.17   | 1541112.58   | 2561750.66   | 0.63 | 365.19  | 590.73  | 876.40  | 1373.32 |
| 0.23 | 454301.24   | 770421.12   | 1179513.01   | 1943850.14   | 0.64 | 315.56  | 504.49  | 747.87  | 1167.46 |
| 0.24 | 350080.74   | 600299.29   | 921858.82    | 1509242.12   | 0.65 | 270.66  | 432.23  | 642.80  | 998.70  |
| 0.25 | 274250.54   | 468465.46   | 725337.54    | 1169371.53   | 0.66 | 232.48  | 372.13  | 552.79  | 850.59  |
| 0.26 | 216780.62   | 370983.20   | 565091.00    | 929261.10    | 0.67 | 200.62  | 319.19  | 471.81  | 730.61  |
| 0.27 | 171862.97   | 292192.81   | 448222.34    | 730953.12    | 0.68 | 171.29  | 272.63  | 405.15  | 616.92  |
| 0.28 | 137622.99   | 234294.09   | 361481.59    | 583733.15    | 0.69 | 145.91  | 232.85  | 342.73  | 521.28  |
| 0.29 | 110946.82   | 188978.49   | 288413.46    | 470174.48    | 0.70 | 125.12  | 198.38  | 292.56  | 439.51  |
| 0.30 | 90064.89    | 152609.61   | 235420.38    | 382630.16    | 0.71 | 106.87  | 169.06  | 246.44  | 370.38  |
| 0.31 | 72726.16    | 123873.33   | 190553.31    | 309119.58    | 0.72 | 90.63   | 142.77  | 206.14  | 316.63  |
| 0.32 | 59444.25    | 100938.37   | 157550.16    | 253741.46    | 0.73 | 77.38   | 120.43  | 174.33  | 267.61  |
| 0.33 | 48550.02    | 82691.06    | 129836.60    | 209034.37    | 0.74 | 65.29   | 101.12  | 147.32  | 225.55  |
| 0.34 | 40104.99    | 68215.58    | 107211.97    | 175802.72    | 0.75 | 55.22   | 85.06   | 124.21  | 189.21  |
| 0.35 | 33494.52    | 56582.90    | 88073.75     | 145507.14    | 0.76 | 46.80   | 71.96   | 103.41  | 155.53  |
| 0.36 | 27682.26    | 46796.38    | 72991.20     | 120218.20    | 0.77 | 39.44   | 60.46   | 85.80   | 128.29  |
| 0.37 | 23176.88    | 39110.55    | 61168.69     | 98419.70     | 0.78 | 33.08   | 50.94   | 71.45   | 104.96  |
| 0.38 | 19250.06    | 32752.02    | 50393.57     | 83021.81     | 0.79 | 27.73   | 42.25   | 59.54   | 85.81   |
| 0.39 | 16183.60    | 27294.85    | 42217.39     | 70402.82     | 0.80 | 23.27   | 35.05   | 49.48   | 71.78   |
| 0.40 | 13521.11    | 22796.64    | 35730.49     | 58101.16     | 0.81 | 19.44   | 29.14   | 40.74   | 58.58   |
| 0.41 | 11395.01    | 19220.37    | 29775.86     | 48537.42     | 0.82 | 16.16   | 24.10   | 33.48   | 48.20   |
| 0.42 | 9603.13     | 16331.66    | 25227.30     | 40639.30     | 0.83 | 13.40   | 19.87   | 27.37   | 39.95   |
| 0.43 | 8154.15     | 13812.93    | 21201.71     | 34245.43     | 0.84 | 10.98   | 16.29   | 22.52   | 32.24   |
| 0.44 | 6955.61     | 11647.79    | 17782.47     | 28783.33     | 0.85 | 9.08    | 13.31   | 18.38   | 25.92   |
| 0.45 | 5929.95     | 9983.53     | 15087.60     | 24442.20     | 0.86 | 7.42    | 10.79   | 14.83   | 20.81   |
| 0.46 | 5052.21     | 8488.78     | 12912.27     | 20876.45     | 0.87 | 6.04    | 8.78    | 11.91   | 16.53   |
| 0.47 | 4322.36     | 7225.40     | 10884.43     | 17434.84     | 0.88 | 4.89    | 7.04    | 9.46    | 13.01   |
| 0.48 | 3681.76     | 6144.54     | 9329.39      | 14530.13     | 0.89 | 3.94    | 5.62    | 7.45    | 10.21   |
| 0.49 | 3147.50     | 5257.93     | 7956.30      | 12493.05     | 0.90 | 3.16    | 4.44    | 5.87    | 7.93    |
| 0.50 | 2683.79     | 4454.29     | 6753.94      | 10670.35     |      |         |         |         |         |

Table S353: Critical values for detector  $\hat{H}_{mov,sn}^{m,0.3}$  with windows size  $n = 0.3$ , and IM-OLS estimation in a model with intercept and linear trend. The number of integrated regressors is 2 and the highest power of  $x_{kt}$  is 1.

| m    | 90 %        | 95 %        | 97,5 %      | 99 %         | m    | 90 %   | 95 %    | 97,5 %  | 99 %    |
|------|-------------|-------------|-------------|--------------|------|--------|---------|---------|---------|
| 0.10 | 11062810.07 | 28561416.21 | 63377553.98 | 153860289.31 | 0.51 | 438.13 | 1008.26 | 2082.59 | 4718.46 |
| 0.11 | 6532552.22  | 17111219.46 | 38338153.48 | 93290177.35  | 0.52 | 378.68 | 855.90  | 1726.81 | 3947.97 |
| 0.12 | 4105367.31  | 10727812.53 | 23708766.93 | 55566313.90  | 0.53 | 319.86 | 724.87  | 1459.74 | 3382.38 |
| 0.13 | 2629379.52  | 6747993.34  | 14808143.18 | 36457722.70  | 0.54 | 272.97 | 624.63  | 1252.05 | 2827.57 |
| 0.14 | 1799066.88  | 4514775.44  | 9967598.70  | 24632364.06  | 0.55 | 234.60 | 520.45  | 1048.92 | 2357.35 |
| 0.15 | 1211045.65  | 3084930.11  | 6700829.71  | 16645554.96  | 0.56 | 197.16 | 444.65  | 908.38  | 2030.80 |
| 0.16 | 834252.45   | 2084381.14  | 4666504.99  | 11618921.11  | 0.57 | 170.10 | 381.29  | 766.61  | 1736.20 |
| 0.17 | 578730.04   | 1493662.78  | 3293074.29  | 8227893.06   | 0.58 | 146.42 | 325.92  | 652.21  | 1421.50 |
| 0.18 | 413951.29   | 1059895.19  | 2405514.48  | 6025253.09   | 0.59 | 125.46 | 276.94  | 546.58  | 1239.40 |
| 0.19 | 297719.57   | 766685.91   | 1676145.73  | 4217182.61   | 0.60 | 108.90 | 237.63  | 467.02  | 1043.60 |
| 0.20 | 225669.71   | 563865.28   | 1240602.20  | 3151978.47   | 0.61 | 93.66  | 202.16  | 402.35  | 878.45  |
| 0.21 | 167620.67   | 425000.53   | 924393.02   | 2334599.97   | 0.62 | 80.38  | 173.08  | 343.83  | 739.58  |
| 0.22 | 127363.41   | 319151.84   | 704301.38   | 1729248.96   | 0.63 | 69.78  | 148.80  | 297.36  | 642.23  |
| 0.23 | 97548.66    | 248470.95   | 534813.47   | 1301586.18   | 0.64 | 59.82  | 126.84  | 244.62  | 538.26  |
| 0.24 | 75636.47    | 190915.89   | 409112.37   | 1007824.85   | 0.65 | 51.51  | 109.71  | 209.48  | 451.81  |
| 0.25 | 58998.66    | 147955.21   | 320727.19   | 773490.76    | 0.66 | 44.02  | 92.46   | 177.20  | 379.28  |
| 0.26 | 45755.01    | 117636.99   | 255226.54   | 618060.85    | 0.67 | 37.84  | 77.89   | 149.35  | 319.66  |
| 0.27 | 36459.58    | 92085.14    | 202133.84   | 501542.83    | 0.68 | 32.88  | 66.89   | 128.07  | 261.59  |
| 0.28 | 28821.70    | 73762.33    | 161389.48   | 395797.56    | 0.69 | 27.94  | 57.29   | 108.45  | 231.52  |
| 0.29 | 23085.68    | 59216.33    | 130080.52   | 309685.03    | 0.70 | 24.03  | 48.49   | 90.69   | 190.41  |
| 0.30 | 18654.41    | 47644.48    | 104274.81   | 253961.81    | 0.71 | 20.60  | 41.25   | 75.60   | 160.90  |
| 0.31 | 15331.83    | 38180.91    | 84316.79    | 201869.11    | 0.72 | 17.50  | 34.87   | 63.82   | 130.13  |
| 0.32 | 12469.93    | 30634.89    | 66308.71    | 158335.68    | 0.73 | 14.95  | 29.16   | 53.19   | 111.18  |
| 0.33 | 10061.03    | 25017.13    | 53029.65    | 125493.18    | 0.74 | 12.81  | 24.55   | 44.25   | 89.53   |
| 0.34 | 8213.40     | 20483.66    | 43512.92    | 103553.64    | 0.75 | 10.87  | 20.60   | 36.29   | 73.79   |
| 0.35 | 6738.01     | 16525.67    | 36015.42    | 84372.72     | 0.76 | 9.26   | 17.32   | 30.11   | 58.98   |
| 0.36 | 5609.72     | 13794.06    | 29604.67    | 70041.23     | 0.77 | 7.84   | 14.43   | 25.15   | 49.71   |
| 0.37 | 4667.48     | 11410.52    | 24556.69    | 57277.77     | 0.78 | 6.63   | 12.19   | 20.59   | 39.82   |
| 0.38 | 3866.20     | 9421.70     | 20449.51    | 48541.54     | 0.79 | 5.59   | 10.13   | 17.12   | 32.13   |
| 0.39 | 3255.03     | 7766.61     | 16676.36    | 39885.10     | 0.80 | 4.70   | 8.31    | 13.90   | 26.01   |
| 0.40 | 2712.73     | 6479.85     | 14242.41    | 33518.93     | 0.81 | 3.95   | 6.90    | 11.28   | 20.95   |
| 0.41 | 2272.86     | 5467.24     | 11956.31    | 28143.95     | 0.82 | 3.27   | 5.73    | 9.41    | 16.71   |
| 0.42 | 1914.17     | 4539.52     | 9772.38     | 23529.39     | 0.83 | 2.75   | 4.72    | 7.64    | 13.38   |
| 0.43 | 1619.99     | 3791.66     | 8058.96     | 19401.97     | 0.84 | 2.27   | 3.85    | 6.16    | 10.43   |
| 0.44 | 1367.53     | 3275.96     | 6754.97     | 15849.81     | 0.85 | 1.83   | 3.13    | 4.88    | 8.27    |
| 0.45 | 1159.30     | 2709.15     | 5755.73     | 12961.98     | 0.86 | 1.49   | 2.48    | 3.91    | 6.43    |
| 0.46 | 973.49      | 2300.94     | 4728.03     | 11195.83     | 0.87 | 1.20   | 1.97    | 3.02    | 4.94    |
| 0.47 | 836.64      | 1959.76     | 4068.89     | 9401.72      | 0.88 | 0.94   | 1.54    | 2.31    | 3.74    |
| 0.48 | 708.45      | 1647.45     | 3455.75     | 8002.05      | 0.89 | 0.74   | 1.18    | 1.78    | 2.83    |
| 0.49 | 606.55      | 1402.08     | 2908.06     | 6614.45      | 0.90 | 0.56   | 0.89    | 1.31    | 2.09    |
| 0.50 | 512.57      | 1172.64     | 2443.39     | 5599.34      |      |        |         |         |         |

Table S354: Critical values for detector  $\hat{H}_{mov,sn}^{m,0.1}$  with windows size  $n = 0.1$ , and FM-OLS and D-OLS estimation in a model with intercept. The number of integrated regressors is 2 and the highest power of  $x_{kt}$  is 2.

| m    | 90 %        | 95 %         | 97,5 %       | 99 %          | m    | 90 %    | 95 %    | 97,5 %   | 99 %     |
|------|-------------|--------------|--------------|---------------|------|---------|---------|----------|----------|
| 0.10 | 72516994.15 | 192033756.71 | 434575195.20 | 1144070528.81 | 0.51 | 2544.87 | 6450.38 | 13993.22 | 33898.32 |
| 0.11 | 43400622.54 | 115092718.19 | 258666329.87 | 658486256.78  | 0.52 | 2165.98 | 5408.15 | 12044.09 | 28415.33 |
| 0.12 | 26622267.93 | 71149970.54  | 161734090.94 | 402792587.62  | 0.53 | 1828.95 | 4544.15 | 10303.06 | 23702.49 |
| 0.13 | 16885143.42 | 45053257.60  | 103949183.75 | 256163865.60  | 0.54 | 1554.73 | 3855.79 | 8649.77  | 20296.85 |
| 0.14 | 11125040.41 | 29305071.63  | 67908128.96  | 165902472.03  | 0.55 | 1337.75 | 3248.79 | 7119.59  | 16734.66 |
| 0.15 | 7662034.34  | 19970434.06  | 45013466.70  | 110832989.11  | 0.56 | 1142.48 | 2745.04 | 5976.33  | 14384.67 |
| 0.16 | 5312870.70  | 14053371.64  | 31887571.48  | 77070815.51   | 0.57 | 978.70  | 2342.58 | 5059.90  | 12198.60 |
| 0.17 | 3716880.50  | 9892231.28   | 22111418.03  | 56447737.68   | 0.58 | 840.84  | 1999.23 | 4303.64  | 10304.43 |
| 0.18 | 2653731.79  | 7063566.88   | 15794640.90  | 40420998.89   | 0.59 | 717.31  | 1681.77 | 3632.45  | 8817.19  |
| 0.19 | 1923783.53  | 5105086.17   | 11335334.45  | 29476421.06   | 0.60 | 609.96  | 1435.07 | 3095.63  | 7356.13  |
| 0.20 | 1446343.73  | 3847057.35   | 8602742.12   | 21333832.11   | 0.61 | 520.89  | 1236.65 | 2590.38  | 6150.03  |
| 0.21 | 1067819.97  | 2887599.32   | 6563595.12   | 16282379.39   | 0.62 | 448.18  | 1050.83 | 2173.93  | 5204.19  |
| 0.22 | 805359.02   | 2175233.77   | 4929078.95   | 12053880.99   | 0.63 | 381.18  | 899.28  | 1850.30  | 4333.36  |
| 0.23 | 620330.03   | 1619039.89   | 3731029.84   | 9188643.80    | 0.64 | 326.59  | 755.88  | 1548.05  | 3602.65  |
| 0.24 | 477721.44   | 1254513.26   | 2876600.38   | 7225948.08    | 0.65 | 279.18  | 634.65  | 1289.67  | 2982.28  |
| 0.25 | 373429.05   | 972611.82    | 2168887.70   | 5521760.84    | 0.66 | 239.78  | 538.05  | 1092.41  | 2504.50  |
| 0.26 | 288643.90   | 770044.04    | 1735821.38   | 4360232.85    | 0.67 | 202.67  | 456.42  | 909.05   | 2110.39  |
| 0.27 | 227966.34   | 610704.15    | 1390649.04   | 3404117.13    | 0.68 | 173.79  | 384.71  | 770.05   | 1725.14  |
| 0.28 | 180043.33   | 488302.39    | 1113432.05   | 2714238.88    | 0.69 | 148.36  | 326.27  | 651.36   | 1439.65  |
| 0.29 | 146164.21   | 387243.86    | 891720.34    | 2131072.68    | 0.70 | 127.78  | 276.53  | 542.04   | 1187.61  |
| 0.30 | 118145.27   | 307382.77    | 711050.13    | 1733435.25    | 0.71 | 109.09  | 231.82  | 453.26   | 996.93   |
| 0.31 | 95285.12    | 249135.65    | 580521.94    | 1393538.73    | 0.72 | 92.47   | 194.60  | 377.28   | 822.68   |
| 0.32 | 76383.22    | 203167.29    | 451710.23    | 1132814.37    | 0.73 | 78.51   | 163.81  | 315.87   | 682.39   |
| 0.33 | 61464.66    | 164574.03    | 359391.56    | 933104.14     | 0.74 | 66.38   | 138.44  | 265.21   | 563.46   |
| 0.34 | 50207.98    | 133594.61    | 291601.27    | 734623.47     | 0.75 | 56.00   | 116.58  | 219.64   | 466.77   |
| 0.35 | 41180.07    | 110526.32    | 243772.16    | 601803.79     | 0.76 | 47.83   | 96.73   | 183.48   | 393.60   |
| 0.36 | 33983.57    | 90180.34     | 204015.17    | 503205.00     | 0.77 | 40.42   | 80.44   | 152.64   | 320.62   |
| 0.37 | 28257.12    | 74876.95     | 165952.49    | 416871.55     | 0.78 | 33.80   | 66.30   | 126.09   | 264.32   |
| 0.38 | 23394.82    | 61102.25     | 138966.77    | 344096.28     | 0.79 | 28.33   | 55.33   | 103.31   | 211.04   |
| 0.39 | 19427.95    | 50815.05     | 117785.07    | 287887.23     | 0.80 | 23.71   | 45.78   | 83.66    | 166.91   |
| 0.40 | 16321.47    | 42964.38     | 97976.27     | 232534.00     | 0.81 | 19.90   | 37.47   | 66.49    | 131.93   |
| 0.41 | 13738.21    | 36023.11     | 82060.90     | 197542.01     | 0.82 | 16.67   | 30.34   | 53.15    | 104.60   |
| 0.42 | 11488.10    | 30121.73     | 68639.03     | 164667.83     | 0.83 | 13.83   | 24.58   | 42.52    | 83.56    |
| 0.43 | 9610.32     | 24873.61     | 57138.65     | 140941.27     | 0.84 | 11.46   | 20.04   | 33.71    | 65.01    |
| 0.44 | 8115.01     | 20690.81     | 47086.01     | 118953.46     | 0.85 | 9.38    | 16.19   | 26.73    | 50.32    |
| 0.45 | 6840.54     | 17261.63     | 39063.77     | 98837.26      | 0.86 | 7.64    | 12.99   | 21.14    | 38.62    |
| 0.46 | 5772.51     | 14506.10     | 32509.30     | 81684.76      | 0.87 | 6.22    | 10.40   | 16.65    | 29.86    |
| 0.47 | 4884.02     | 12347.96     | 27134.71     | 66939.74      | 0.88 | 4.98    | 8.22    | 12.96    | 22.06    |
| 0.48 | 4115.07     | 10654.84     | 22918.67     | 55618.55      | 0.89 | 3.96    | 6.39    | 9.88     | 16.71    |
| 0.49 | 3500.18     | 9010.27      | 19245.61     | 46586.51      | 0.90 | 3.10    | 4.89    | 7.33     | 12.31    |
| 0.50 | 2970.55     | 7546.10      | 16369.52     | 39828.33      |      |         |         |          |          |

Table S355: Critical values for detector  $\hat{H}_{mov,sn}^{m,0.1}$  with windows size  $n = 0.1$ , and IM-OLS estimation in a model with intercept. The number of integrated regressors is 2 and the highest power of  $x_{kt}$  is 2.

| m    | 90 %        | 95 %        | 97,5 %      | 99 %         | m    | 90 %   | 95 %    | 97,5 %  | 99 %    |
|------|-------------|-------------|-------------|--------------|------|--------|---------|---------|---------|
| 0.10 | 17040037.34 | 44200871.21 | 98195547.62 | 239589901.80 | 0.51 | 630.26 | 1435.67 | 2947.87 | 6539.69 |
| 0.11 | 10054483.51 | 26323869.72 | 59736996.51 | 146385701.46 | 0.52 | 541.27 | 1217.53 | 2440.68 | 5435.95 |
| 0.12 | 6313719.44  | 16688043.13 | 36874933.36 | 88057962.64  | 0.53 | 455.06 | 1026.88 | 2055.93 | 4671.09 |
| 0.13 | 4064951.32  | 10454033.29 | 22964328.36 | 56643706.46  | 0.54 | 387.90 | 877.30  | 1746.95 | 3894.52 |
| 0.14 | 2770172.34  | 7011104.90  | 15350113.55 | 38962186.19  | 0.55 | 330.43 | 728.02  | 1450.90 | 3262.82 |
| 0.15 | 1871385.44  | 4762626.81  | 10357313.30 | 25768738.35  | 0.56 | 277.13 | 613.82  | 1241.22 | 2772.74 |
| 0.16 | 1278943.27  | 3239210.63  | 7240316.52  | 18263939.65  | 0.57 | 237.35 | 529.24  | 1038.57 | 2339.77 |
| 0.17 | 891457.89   | 2302782.26  | 5129012.58  | 12803352.88  | 0.58 | 203.68 | 446.05  | 889.58  | 1907.14 |
| 0.18 | 635881.50   | 1624491.96  | 3715081.64  | 9321938.63   | 0.59 | 174.70 | 375.29  | 742.80  | 1662.29 |
| 0.19 | 458087.00   | 1188022.12  | 2583704.83  | 6543885.76   | 0.60 | 149.43 | 322.25  | 630.69  | 1373.52 |
| 0.20 | 344055.78   | 867848.73   | 1931503.19  | 4878276.99   | 0.61 | 128.21 | 273.52  | 536.60  | 1161.44 |
| 0.21 | 255924.55   | 658398.76   | 1424231.95  | 3613928.03   | 0.62 | 110.08 | 232.62  | 452.20  | 964.83  |
| 0.22 | 194826.07   | 491089.42   | 1080840.63  | 2669294.76   | 0.63 | 94.63  | 201.05  | 391.66  | 833.37  |
| 0.23 | 149041.97   | 381404.05   | 820909.72   | 2005950.58   | 0.64 | 80.30  | 168.68  | 321.85  | 696.84  |
| 0.24 | 114992.12   | 290836.89   | 630508.22   | 1552507.81   | 0.65 | 68.99  | 144.26  | 271.57  | 579.74  |
| 0.25 | 89812.29    | 225905.63   | 488462.87   | 1178172.32   | 0.66 | 58.39  | 121.24  | 226.16  | 479.30  |
| 0.26 | 69865.93    | 178897.88   | 389661.19   | 950501.31    | 0.67 | 49.77  | 101.26  | 189.82  | 405.34  |
| 0.27 | 55188.50    | 140142.19   | 307696.35   | 757771.64    | 0.68 | 42.96  | 85.89   | 162.09  | 327.31  |
| 0.28 | 43663.51    | 111471.27   | 246255.90   | 595396.44    | 0.69 | 36.15  | 72.32   | 137.00  | 282.94  |
| 0.29 | 34993.06    | 89521.59    | 195031.06   | 473637.43    | 0.70 | 31.04  | 61.12   | 112.84  | 233.15  |
| 0.30 | 28273.36    | 71813.81    | 157134.49   | 386576.22    | 0.71 | 26.34  | 51.93   | 93.32   | 194.55  |
| 0.31 | 23032.42    | 58056.04    | 127168.60   | 302806.74    | 0.72 | 22.14  | 43.17   | 77.88   | 156.38  |
| 0.32 | 18805.76    | 46158.96    | 100114.91   | 238912.43    | 0.73 | 18.76  | 35.99   | 64.07   | 132.40  |
| 0.33 | 15105.83    | 37547.00    | 79570.75    | 188036.89    | 0.74 | 15.81  | 30.13   | 52.87   | 106.20  |
| 0.34 | 12350.23    | 30340.48    | 64882.55    | 154899.57    | 0.75 | 13.35  | 24.78   | 42.67   | 85.96   |
| 0.35 | 10123.93    | 24791.34    | 53743.22    | 125723.93    | 0.76 | 11.19  | 20.64   | 35.57   | 68.36   |
| 0.36 | 8359.79     | 20558.02    | 43866.30    | 104041.26    | 0.77 | 9.34   | 16.91   | 29.06   | 56.29   |
| 0.37 | 6965.94     | 17009.31    | 36242.46    | 85366.18     | 0.78 | 7.83   | 14.07   | 23.47   | 44.60   |
| 0.38 | 5775.97     | 14037.93    | 30057.62    | 72190.66     | 0.79 | 6.47   | 11.53   | 19.39   | 35.48   |
| 0.39 | 4826.21     | 11552.29    | 24576.46    | 59179.98     | 0.80 | 5.38   | 9.39    | 15.46   | 28.50   |
| 0.40 | 4028.16     | 9543.47     | 20888.39    | 49027.55     | 0.81 | 4.42   | 7.64    | 12.35   | 22.75   |
| 0.41 | 3349.55     | 8044.92     | 17471.87    | 41505.61     | 0.82 | 3.61   | 6.24    | 10.18   | 17.88   |
| 0.42 | 2830.63     | 6725.68     | 14332.24    | 33688.28     | 0.83 | 2.99   | 5.10    | 8.13    | 14.10   |
| 0.43 | 2381.26     | 5577.82     | 11757.43    | 27905.93     | 0.84 | 2.45   | 4.11    | 6.51    | 10.90   |
| 0.44 | 2005.32     | 4802.49     | 9785.16     | 22750.84     | 0.85 | 1.96   | 3.29    | 5.08    | 8.56    |
| 0.45 | 1698.34     | 3956.49     | 8222.82     | 18820.54     | 0.86 | 1.58   | 2.58    | 4.04    | 6.62    |
| 0.46 | 1425.84     | 3337.54     | 6889.50     | 15880.39     | 0.87 | 1.28   | 2.06    | 3.12    | 5.05    |
| 0.47 | 1214.10     | 2828.75     | 5866.82     | 13431.61     | 0.88 | 1.03   | 1.61    | 2.39    | 3.82    |
| 0.48 | 1025.64     | 2376.96     | 4949.97     | 11391.87     | 0.89 | 0.86   | 1.26    | 1.85    | 2.91    |
| 0.49 | 869.83      | 2011.50     | 4153.33     | 9414.32      | 0.90 | 0.73   | 0.98    | 1.39    | 2.17    |
| 0.50 | 738.23      | 1671.56     | 3509.64     | 7825.59      |      |        |         |         |         |

Table S356: Critical values for detector  $\hat{H}_{mov,sn}^{m,0.2}$  with windows size  $n = 0.2$ , and FM-OLS and D-OLS estimation in a model with intercept. The number of integrated regressors is 2 and the highest power of  $x_{kt}$  is 2.

| m    | 90 %         | 95 %         | 97,5 %       | 99 %          | m    | 90 %    | 95 %    | 97,5 %   | 99 %     |
|------|--------------|--------------|--------------|---------------|------|---------|---------|----------|----------|
| 0.10 | 111868587.91 | 297098715.32 | 678814462.79 | 1778029004.76 | 0.51 | 3644.55 | 9120.80 | 19500.40 | 47406.19 |
| 0.11 | 66341571.64  | 177581390.47 | 403382503.44 | 1032219856.81 | 0.52 | 3086.01 | 7646.84 | 16715.27 | 39354.14 |
| 0.12 | 40720974.52  | 110075914.97 | 250663702.78 | 627245682.73  | 0.53 | 2590.82 | 6412.01 | 14218.12 | 33142.57 |
| 0.13 | 25859118.88  | 69543817.70  | 160926297.23 | 402029542.29  | 0.54 | 2192.39 | 5387.89 | 11886.84 | 27870.87 |
| 0.14 | 17128347.27  | 44977641.82  | 105337277.26 | 258290415.75  | 0.55 | 1870.87 | 4553.62 | 9879.65  | 22657.22 |
| 0.15 | 11742020.54  | 30909834.65  | 69867025.53  | 172233615.24  | 0.56 | 1601.60 | 3810.47 | 8252.15  | 19368.43 |
| 0.16 | 8146929.91   | 21694101.18  | 49407748.61  | 119714925.36  | 0.57 | 1367.60 | 3229.11 | 6884.01  | 16431.06 |
| 0.17 | 5691546.22   | 15263350.09  | 34195290.07  | 88215187.57   | 0.58 | 1163.47 | 2720.86 | 5789.93  | 13639.51 |
| 0.18 | 4065331.39   | 10910160.52  | 24472655.50  | 63317731.22   | 0.59 | 988.96  | 2281.24 | 4899.90  | 11824.17 |
| 0.19 | 2947619.25   | 7827302.27   | 17537240.78  | 45939399.91   | 0.60 | 836.27  | 1940.28 | 4137.32  | 9776.11  |
| 0.20 | 2206655.19   | 5913304.84   | 13203180.45  | 33170140.44   | 0.61 | 710.47  | 1660.44 | 3443.93  | 8091.55  |
| 0.21 | 1635502.40   | 4414825.84   | 10065230.73  | 25267485.78   | 0.62 | 603.55  | 1409.56 | 2872.93  | 6848.99  |
| 0.22 | 1227992.54   | 3349222.98   | 7562924.53   | 18461354.09   | 0.63 | 515.59  | 1185.27 | 2422.09  | 5610.14  |
| 0.23 | 941805.85    | 2484365.01   | 5718093.45   | 14169414.82   | 0.64 | 436.28  | 994.45  | 2009.81  | 4680.13  |
| 0.24 | 728378.19    | 1918615.08   | 4390874.27   | 11032934.93   | 0.65 | 373.16  | 829.82  | 1667.97  | 3789.90  |
| 0.25 | 565650.23    | 1486634.79   | 3336890.41   | 8446369.21    | 0.66 | 316.39  | 696.97  | 1394.87  | 3176.57  |
| 0.26 | 437365.40    | 1170759.58   | 2628566.13   | 6705782.93    | 0.67 | 267.13  | 587.39  | 1157.83  | 2648.97  |
| 0.27 | 343661.43    | 925563.07    | 2116955.48   | 5176982.38    | 0.68 | 226.67  | 493.08  | 971.85   | 2167.29  |
| 0.28 | 272795.48    | 743270.33    | 1695785.51   | 4102829.92    | 0.69 | 192.23  | 412.57  | 809.69   | 1751.19  |
| 0.29 | 220286.12    | 588979.74    | 1346619.40   | 3243195.27    | 0.70 | 163.49  | 346.03  | 674.36   | 1436.97  |
| 0.30 | 177793.41    | 464994.84    | 1076598.38   | 2640621.14    | 0.71 | 138.72  | 288.89  | 560.32   | 1195.85  |
| 0.31 | 143043.39    | 371533.69    | 871425.95    | 2104330.41    | 0.72 | 116.95  | 241.23  | 461.06   | 985.89   |
| 0.32 | 114928.74    | 301830.15    | 675477.71    | 1706331.69    | 0.73 | 98.08   | 200.68  | 379.83   | 802.33   |
| 0.33 | 91702.63     | 246512.86    | 538937.59    | 1411211.17    | 0.74 | 82.11   | 166.81  | 313.26   | 661.71   |
| 0.34 | 75342.13     | 200093.79    | 438356.12    | 1091574.69    | 0.75 | 68.86   | 139.71  | 259.76   | 540.03   |
| 0.35 | 61356.33     | 163937.56    | 362499.03    | 903183.83     | 0.76 | 58.11   | 115.14  | 213.47   | 445.29   |
| 0.36 | 50765.94     | 134599.64    | 302840.43    | 739609.62     | 0.77 | 48.73   | 94.47   | 175.12   | 362.67   |
| 0.37 | 42272.88     | 110598.26    | 245863.55    | 619419.24     | 0.78 | 40.27   | 77.02   | 143.41   | 294.86   |
| 0.38 | 34531.79     | 90487.26     | 203113.40    | 503403.27     | 0.79 | 33.35   | 63.63   | 116.05   | 235.12   |
| 0.39 | 28571.90     | 75117.83     | 173192.18    | 422170.26     | 0.80 | 27.49   | 51.83   | 92.97    | 182.36   |
| 0.40 | 24040.67     | 63524.43     | 143528.31    | 344483.84     | 0.81 | 22.81   | 41.98   | 73.34    | 142.57   |
| 0.41 | 20182.70     | 52743.96     | 119366.01    | 290830.28     | 0.82 | 18.73   | 33.60   | 57.88    | 112.09   |
| 0.42 | 16910.18     | 44060.77     | 100586.85    | 238029.47     | 0.83 | 15.37   | 26.87   | 45.66    | 88.01    |
| 0.43 | 14074.35     | 36371.39     | 83493.19     | 201149.66     | 0.84 | 12.53   | 21.65   | 35.90    | 68.10    |
| 0.44 | 11842.85     | 30301.55     | 68267.92     | 171252.70     | 0.85 | 10.13   | 17.20   | 28.11    | 52.14    |
| 0.45 | 9984.05      | 25123.29     | 56751.98     | 141500.70     | 0.86 | 8.18    | 13.68   | 21.98    | 39.73    |
| 0.46 | 8354.21      | 20824.33     | 46781.33     | 116743.75     | 0.87 | 6.57    | 10.82   | 17.14    | 30.42    |
| 0.47 | 6999.36      | 17643.67     | 38545.19     | 96211.65      | 0.88 | 5.23    | 8.50    | 13.26    | 22.39    |
| 0.48 | 5938.68      | 15118.97     | 32633.49     | 78662.72      | 0.89 | 4.13    | 6.56    | 10.06    | 16.89    |
| 0.49 | 5066.15      | 12783.00     | 27348.79     | 65779.55      | 0.90 | 3.23    | 5.02    | 7.47     | 12.45    |
| 0.50 | 4248.23      | 10789.86     | 22675.63     | 55738.90      |      |         |         |          |          |

Table S357: Critical values for detector  $\hat{H}_{mov,sn}^{m,0.2}$  with windows size  $n = 0.2$ , and IM-OLS estimation in a model with intercept. The number of integrated regressors is 2 and the highest power of  $x_{kt}$  is 2.

| m    | 90 %        | 95 %        | 97,5 %       | 99 %         | m    | 90 %   | 95 %    | 97,5 %  | 99 %    |
|------|-------------|-------------|--------------|--------------|------|--------|---------|---------|---------|
| 0.10 | 20113257.36 | 52299324.73 | 116759527.19 | 288121037.51 | 0.51 | 696.78 | 1584.35 | 3211.12 | 7131.91 |
| 0.11 | 11866905.86 | 31132095.71 | 71279791.24  | 174597070.57 | 0.52 | 597.17 | 1331.66 | 2682.61 | 5883.24 |
| 0.12 | 7435617.33  | 19663354.64 | 43513390.73  | 104970651.06 | 0.53 | 502.89 | 1123.43 | 2225.50 | 5000.31 |
| 0.13 | 4771603.35  | 12305558.40 | 27293459.67  | 67685930.90  | 0.54 | 426.87 | 949.31  | 1905.47 | 4221.42 |
| 0.14 | 3253824.90  | 8249810.37  | 18231714.58  | 46276108.06  | 0.55 | 361.49 | 792.24  | 1565.74 | 3462.65 |
| 0.15 | 2209871.10  | 5612801.12  | 12274245.00  | 30448331.28  | 0.56 | 302.21 | 664.25  | 1322.81 | 2975.21 |
| 0.16 | 1496941.44  | 3815106.20  | 8601625.29   | 21628029.55  | 0.57 | 258.64 | 570.34  | 1114.11 | 2483.84 |
| 0.17 | 1044730.17  | 2729909.80  | 6049277.20   | 15185745.35  | 0.58 | 220.95 | 479.50  | 946.83  | 2026.85 |
| 0.18 | 746524.14   | 1920302.10  | 4373672.15   | 11035714.56  | 0.59 | 189.18 | 401.36  | 792.48  | 1748.21 |
| 0.19 | 539249.70   | 1397086.86  | 3075388.93   | 7689623.15   | 0.60 | 161.64 | 343.24  | 668.63  | 1447.42 |
| 0.20 | 401413.69   | 1017716.16  | 2275865.26   | 5735261.42   | 0.61 | 137.91 | 290.15  | 568.08  | 1217.59 |
| 0.21 | 300227.74   | 775190.24   | 1678849.92   | 4261564.23   | 0.62 | 117.55 | 246.24  | 474.41  | 1003.94 |
| 0.22 | 227025.92   | 577398.89   | 1268403.28   | 3096142.96   | 0.63 | 100.51 | 210.93  | 409.71  | 865.36  |
| 0.23 | 174102.43   | 443967.51   | 961183.65    | 2350154.88   | 0.64 | 85.08  | 177.47  | 335.76  | 725.75  |
| 0.24 | 134560.53   | 340482.07   | 738524.31    | 1823011.10   | 0.65 | 72.68  | 151.12  | 282.66  | 596.31  |
| 0.25 | 104515.23   | 263163.98   | 567412.39    | 1374733.66   | 0.66 | 61.36  | 125.59  | 233.02  | 492.27  |
| 0.26 | 81432.84    | 208317.47   | 454112.80    | 1111138.88   | 0.67 | 52.09  | 104.92  | 195.34  | 415.47  |
| 0.27 | 64361.48    | 163690.49   | 358743.22    | 883917.96    | 0.68 | 44.72  | 88.72   | 166.32  | 333.63  |
| 0.28 | 50663.80    | 129184.76   | 285650.68    | 686762.45    | 0.69 | 37.47  | 74.33   | 140.11  | 288.79  |
| 0.29 | 40587.59    | 104362.05   | 225463.90    | 548031.63    | 0.70 | 31.95  | 62.59   | 114.63  | 237.40  |
| 0.30 | 32885.15    | 83254.68    | 181804.71    | 446507.00    | 0.71 | 27.02  | 52.86   | 94.49   | 197.01  |
| 0.31 | 26694.17    | 66646.87    | 146464.23    | 349860.42    | 0.72 | 22.62  | 43.97   | 78.82   | 158.14  |
| 0.32 | 21813.00    | 53628.17    | 115233.91    | 278860.42    | 0.73 | 19.09  | 36.43   | 64.65   | 133.16  |
| 0.33 | 17534.69    | 43281.95    | 91575.86     | 216546.00    | 0.74 | 16.03  | 30.41   | 53.27   | 106.75  |
| 0.34 | 14265.16    | 34901.89    | 74565.68     | 177113.76    | 0.75 | 13.51  | 24.96   | 42.97   | 86.35   |
| 0.35 | 11679.79    | 28378.48    | 61296.37     | 143850.63    | 0.76 | 11.30  | 20.76   | 35.70   | 68.68   |
| 0.36 | 9587.87     | 23543.98    | 49892.17     | 118244.60    | 0.77 | 9.44   | 17.01   | 29.15   | 56.38   |
| 0.37 | 8000.75     | 19462.96    | 41401.50     | 97483.25     | 0.78 | 7.91   | 14.15   | 23.55   | 44.68   |
| 0.38 | 6594.72     | 16025.77    | 34141.24     | 81128.17     | 0.79 | 6.55   | 11.62   | 19.49   | 35.58   |
| 0.39 | 5518.62     | 13134.14    | 27861.31     | 66157.39     | 0.80 | 5.46   | 9.47    | 15.54   | 28.63   |
| 0.40 | 4615.04     | 10910.73    | 23565.80     | 55305.37     | 0.81 | 4.52   | 7.73    | 12.45   | 22.84   |
| 0.41 | 3810.52     | 9088.72     | 19924.46     | 46643.02     | 0.82 | 3.72   | 6.34    | 10.29   | 17.99   |
| 0.42 | 3206.52     | 7562.35     | 16113.93     | 37268.26     | 0.83 | 3.11   | 5.20    | 8.24    | 14.23   |
| 0.43 | 2696.06     | 6313.23     | 13287.26     | 31058.75     | 0.84 | 2.56   | 4.22    | 6.61    | 10.98   |
| 0.44 | 2268.99     | 5414.45     | 10899.07     | 25569.30     | 0.85 | 2.07   | 3.39    | 5.19    | 8.66    |
| 0.45 | 1920.25     | 4431.44     | 9169.76      | 21028.23     | 0.86 | 1.70   | 2.70    | 4.15    | 6.72    |
| 0.46 | 1597.95     | 3721.28     | 7662.17      | 17596.04     | 0.87 | 1.40   | 2.18    | 3.23    | 5.17    |
| 0.47 | 1357.91     | 3166.04     | 6480.64      | 14754.99     | 0.88 | 1.18   | 1.74    | 2.50    | 3.94    |
| 0.48 | 1145.04     | 2649.36     | 5476.01      | 12357.60     | 0.89 | 1.04   | 1.38    | 1.97    | 3.02    |
| 0.49 | 968.29      | 2237.18     | 4578.67      | 10286.27     | 0.90 | 0.93   | 1.13    | 1.51    | 2.27    |
| 0.50 | 821.37      | 1844.30     | 3833.01      | 8411.17      |      |        |         |         |         |

Table S358: Critical values for detector  $\hat{H}_{mov,sn}^{m,0.3}$  with windows size  $n = 0.3$ , and FM-OLS and D-OLS estimation in a model with intercept. The number of integrated regressors is 2 and the highest power of  $x_{kt}$  is 2.

| m    | 90 %         | 95 %         | 97,5 %       | 99 %          | m    | 90 %    | 95 %    | 97,5 %   | 99 %     |
|------|--------------|--------------|--------------|---------------|------|---------|---------|----------|----------|
| 0.10 | 131743698.89 | 353229036.79 | 806447966.19 | 2134283256.50 | 0.51 | 4031.15 | 9979.39 | 21369.36 | 50831.15 |
| 0.11 | 77690046.29  | 210903060.98 | 483292389.17 | 1233240609.72 | 0.52 | 3400.97 | 8361.05 | 18149.64 | 42643.11 |
| 0.12 | 48028800.42  | 130408875.84 | 298277521.84 | 754225434.07  | 0.53 | 2863.94 | 6976.60 | 15249.12 | 35685.52 |
| 0.13 | 30599865.32  | 82544011.11  | 190886118.89 | 481251162.23  | 0.54 | 2410.24 | 5878.53 | 12769.66 | 29728.51 |
| 0.14 | 20142333.40  | 53385693.91  | 124977287.21 | 304086242.77  | 0.55 | 2038.53 | 4951.71 | 10598.99 | 24239.84 |
| 0.15 | 13759014.26  | 36633590.24  | 82751400.72  | 205639707.20  | 0.56 | 1741.31 | 4123.87 | 8852.69  | 20357.65 |
| 0.16 | 9560618.63   | 25532335.50  | 58188969.26  | 143646217.80  | 0.57 | 1492.78 | 3473.83 | 7349.13  | 17416.90 |
| 0.17 | 6684354.68   | 17912086.23  | 40437648.89  | 103527909.77  | 0.58 | 1260.76 | 2913.68 | 6165.44  | 14395.71 |
| 0.18 | 4762292.40   | 12879530.95  | 28993249.89  | 74711159.07   | 0.59 | 1070.31 | 2437.24 | 5208.87  | 12372.41 |
| 0.19 | 3457441.16   | 9224863.60   | 20665016.03  | 54187313.94   | 0.60 | 898.99  | 2067.65 | 4377.91  | 10221.46 |
| 0.20 | 2585795.75   | 6938260.23   | 15586992.42  | 39013416.94   | 0.61 | 757.53  | 1752.09 | 3641.96  | 8466.34  |
| 0.21 | 1912048.17   | 5180424.05   | 11783473.48  | 29449193.93   | 0.62 | 642.66  | 1488.59 | 3016.03  | 7121.04  |
| 0.22 | 1433228.13   | 3913525.03   | 8848077.65   | 21714896.92   | 0.63 | 548.37  | 1254.21 | 2523.45  | 5833.31  |
| 0.23 | 1099167.48   | 2909423.98   | 6701613.37   | 16784388.28   | 0.64 | 461.75  | 1045.09 | 2099.22  | 4859.81  |
| 0.24 | 852814.87    | 2236707.14   | 5124948.94   | 12827596.90   | 0.65 | 392.15  | 866.09  | 1732.39  | 3910.42  |
| 0.25 | 656989.47    | 1733280.73   | 3889650.65   | 9963719.24    | 0.66 | 331.38  | 725.82  | 1447.93  | 3262.55  |
| 0.26 | 505739.15    | 1362584.21   | 3071126.48   | 7764210.11    | 0.67 | 278.39  | 606.48  | 1189.73  | 2699.29  |
| 0.27 | 397747.90    | 1076144.06   | 2446939.12   | 6012441.58    | 0.68 | 235.71  | 509.57  | 993.95   | 2214.54  |
| 0.28 | 315938.93    | 858508.12    | 1949155.18   | 4774898.82    | 0.69 | 198.55  | 423.66  | 829.74   | 1792.71  |
| 0.29 | 254480.23    | 682182.38    | 1555161.85   | 3745878.15    | 0.70 | 168.38  | 353.62  | 687.62   | 1461.55  |
| 0.30 | 205457.30    | 537756.65    | 1245477.03   | 3062412.65    | 0.71 | 142.42  | 294.97  | 568.04   | 1208.30  |
| 0.31 | 164462.28    | 430066.18    | 1002048.94   | 2420149.86    | 0.72 | 119.61  | 244.98  | 466.63   | 993.90   |
| 0.32 | 133210.15    | 347217.72    | 783327.39    | 1971515.14    | 0.73 | 99.80   | 203.68  | 383.46   | 807.91   |
| 0.33 | 106162.44    | 282987.75    | 621378.83    | 1610589.60    | 0.74 | 83.37   | 168.64  | 316.13   | 664.76   |
| 0.34 | 86748.89     | 229736.59    | 503185.25    | 1265905.86    | 0.75 | 69.78   | 140.98  | 260.70   | 540.82   |
| 0.35 | 70643.68     | 187454.11    | 411794.49    | 1023605.37    | 0.76 | 58.68   | 115.96  | 214.19   | 446.70   |
| 0.36 | 58137.67     | 153740.50    | 342492.31    | 838040.66     | 0.77 | 49.09   | 94.95   | 175.53   | 363.96   |
| 0.37 | 48315.20     | 126224.93    | 277991.53    | 693871.05     | 0.78 | 40.51   | 77.28   | 143.69   | 295.13   |
| 0.38 | 39471.01     | 102619.28    | 231320.76    | 573658.93     | 0.79 | 33.53   | 63.79   | 116.25   | 235.55   |
| 0.39 | 32681.16     | 85153.49     | 195089.60    | 473748.45     | 0.80 | 27.62   | 51.97   | 93.06    | 182.43   |
| 0.40 | 27241.76     | 71450.68     | 162531.15    | 391614.46     | 0.81 | 22.93   | 42.12   | 73.47    | 142.62   |
| 0.41 | 22947.36     | 59217.83     | 135556.70    | 328276.85     | 0.82 | 18.83   | 33.73   | 57.97    | 112.16   |
| 0.42 | 19139.45     | 49531.46     | 112707.22    | 267702.37     | 0.83 | 15.46   | 26.97   | 45.76    | 88.13    |
| 0.43 | 15932.24     | 40941.91     | 92746.44     | 221590.28     | 0.84 | 12.64   | 21.74   | 35.99    | 68.21    |
| 0.44 | 13305.34     | 33828.71     | 75759.63     | 187693.62     | 0.85 | 10.25   | 17.31   | 28.21    | 52.33    |
| 0.45 | 11224.65     | 27904.80     | 63169.95     | 156284.32     | 0.86 | 8.30    | 13.79   | 22.07    | 39.89    |
| 0.46 | 9384.50      | 23243.57     | 52303.48     | 127715.39     | 0.87 | 6.68    | 10.93   | 17.27    | 30.52    |
| 0.47 | 7849.23      | 19582.92     | 42749.96     | 105719.12     | 0.88 | 5.34    | 8.62    | 13.35    | 22.50    |
| 0.48 | 6647.56      | 16669.56     | 35926.71     | 86447.41      | 0.89 | 4.24    | 6.68    | 10.20    | 17.00    |
| 0.49 | 5612.14      | 14060.17     | 29803.68     | 72406.47      | 0.90 | 3.34    | 5.13    | 7.57     | 12.57    |
| 0.50 | 4726.49      | 11913.59     | 24812.58     | 61112.92      |      |         |         |          |          |

Table S359: Critical values for detector  $\hat{H}_{mov,sn}^{m,0.3}$  with windows size  $n = 0.3$ , and IM-OLS estimation in a model with intercept. The number of integrated regressors is 2 and the highest power of  $x_{kt}$  is 2.



| m    | 90 %        | 95 %         | 97,5 %       | 99 %         | m    | 90 %    | 95 %    | 97,5 %  | 99 %    |
|------|-------------|--------------|--------------|--------------|------|---------|---------|---------|---------|
| 0.10 | 48613025.70 | 103503300.38 | 206832401.28 | 459457780.14 | 0.51 | 1203.19 | 2293.24 | 4179.13 | 8473.22 |
| 0.11 | 27955296.79 | 59064368.23  | 117634701.03 | 265288105.65 | 0.52 | 1014.94 | 1955.31 | 3469.14 | 7216.58 |
| 0.12 | 16833101.99 | 35074736.13  | 69956826.83  | 156988462.22 | 0.53 | 855.67  | 1627.17 | 2891.73 | 6228.14 |
| 0.13 | 10380176.88 | 21693821.28  | 42610118.50  | 94792669.06  | 0.54 | 733.32  | 1391.75 | 2436.72 | 5152.08 |
| 0.14 | 6811655.42  | 14038842.55  | 27712377.17  | 62627664.19  | 0.55 | 621.84  | 1163.18 | 2086.89 | 4380.91 |
| 0.15 | 4523126.90  | 9361048.64   | 18223147.32  | 41293402.04  | 0.56 | 529.62  | 1001.34 | 1762.31 | 3682.65 |
| 0.16 | 3049163.75  | 6260674.28   | 12215321.02  | 27920144.02  | 0.57 | 455.16  | 857.13  | 1523.19 | 3092.82 |
| 0.17 | 2129920.83  | 4400403.97   | 8383197.17   | 19269179.23  | 0.58 | 389.39  | 727.69  | 1272.02 | 2602.43 |
| 0.18 | 1505690.46  | 3091903.41   | 5930278.45   | 13379620.78  | 0.59 | 331.08  | 617.63  | 1101.75 | 2233.99 |
| 0.19 | 1069606.41  | 2201004.00   | 4227002.98   | 9329179.25   | 0.60 | 284.82  | 528.15  | 942.20  | 1855.07 |
| 0.20 | 788461.20   | 1600274.16   | 3082786.03   | 6905665.32   | 0.61 | 245.73  | 452.50  | 799.68  | 1588.76 |
| 0.21 | 571669.72   | 1173148.20   | 2246741.65   | 4957167.73   | 0.62 | 208.45  | 385.32  | 672.52  | 1361.44 |
| 0.22 | 433580.94   | 875928.09    | 1691883.94   | 3646507.08   | 0.63 | 179.39  | 333.10  | 586.97  | 1167.92 |
| 0.23 | 325338.08   | 664605.11    | 1280334.34   | 2732591.48   | 0.64 | 152.56  | 282.64  | 486.99  | 977.89  |
| 0.24 | 248161.68   | 508674.48    | 967611.40    | 2059906.36   | 0.65 | 130.09  | 240.41  | 412.70  | 789.89  |
| 0.25 | 190670.77   | 386838.00    | 745224.37    | 1586200.27   | 0.66 | 111.52  | 200.99  | 348.01  | 666.35  |
| 0.26 | 147968.65   | 299862.45    | 586568.99    | 1240649.93   | 0.67 | 94.80   | 173.11  | 294.51  | 561.02  |
| 0.27 | 116417.92   | 238315.58    | 454871.79    | 991773.31    | 0.68 | 80.52   | 145.47  | 242.58  | 474.48  |
| 0.28 | 92294.03    | 187570.03    | 356619.40    | 777764.03    | 0.69 | 69.18   | 124.67  | 211.08  | 401.58  |
| 0.29 | 73457.89    | 147963.15    | 280938.24    | 624712.74    | 0.70 | 58.71   | 104.81  | 173.92  | 340.42  |
| 0.30 | 58241.38    | 117747.55    | 226785.99    | 475331.51    | 0.71 | 50.06   | 87.96   | 149.33  | 287.58  |
| 0.31 | 47473.94    | 94909.52     | 177963.23    | 388164.77    | 0.72 | 42.30   | 74.80   | 122.93  | 233.46  |
| 0.32 | 37837.55    | 76006.95     | 144091.21    | 303485.61    | 0.73 | 35.69   | 62.42   | 104.66  | 197.76  |
| 0.33 | 30482.44    | 60456.94     | 113495.64    | 237600.09    | 0.74 | 29.97   | 52.60   | 85.94   | 160.81  |
| 0.34 | 25046.49    | 49312.41     | 90008.15     | 191488.59    | 0.75 | 25.10   | 43.84   | 72.12   | 133.48  |
| 0.35 | 20260.90    | 40333.64     | 74714.98     | 154373.83    | 0.76 | 21.40   | 36.30   | 59.53   | 108.28  |
| 0.36 | 16637.95    | 33369.53     | 61704.16     | 130001.70    | 0.77 | 17.78   | 30.50   | 49.65   | 90.45   |
| 0.37 | 13778.65    | 27661.34     | 51060.67     | 106687.74    | 0.78 | 14.89   | 25.15   | 40.74   | 71.38   |
| 0.38 | 11333.65    | 22727.75     | 42477.87     | 90272.81     | 0.79 | 12.42   | 20.92   | 33.51   | 57.62   |
| 0.39 | 9273.80     | 18703.82     | 35159.72     | 72629.41     | 0.80 | 10.15   | 17.10   | 26.94   | 46.41   |
| 0.40 | 7751.17     | 15502.69     | 29291.54     | 60357.94     | 0.81 | 8.41    | 13.89   | 21.78   | 37.12   |
| 0.41 | 6475.82     | 12964.76     | 24293.49     | 51448.02     | 0.82 | 6.93    | 11.37   | 17.57   | 29.25   |
| 0.42 | 5459.85     | 10777.40     | 20094.82     | 43147.59     | 0.83 | 5.67    | 9.37    | 14.06   | 23.17   |
| 0.43 | 4604.69     | 8993.66      | 16766.34     | 35762.09     | 0.84 | 4.61    | 7.44    | 11.13   | 18.29   |
| 0.44 | 3864.14     | 7559.78      | 14093.16     | 29378.67     | 0.85 | 3.68    | 5.89    | 8.87    | 14.17   |
| 0.45 | 3245.86     | 6349.58      | 11618.22     | 24652.32     | 0.86 | 2.94    | 4.71    | 6.97    | 10.79   |
| 0.46 | 2728.21     | 5339.51      | 9656.17      | 20453.01     | 0.87 | 2.30    | 3.66    | 5.40    | 8.43    |
| 0.47 | 2310.27     | 4497.35      | 8270.87      | 17590.49     | 0.88 | 1.81    | 2.82    | 4.10    | 6.21    |
| 0.48 | 1958.40     | 3771.10      | 6956.49      | 14615.77     | 0.89 | 1.37    | 2.13    | 3.08    | 4.67    |
| 0.49 | 1658.92     | 3202.62      | 5830.38      | 12043.50     | 0.90 | 1.02    | 1.57    | 2.25    | 3.45    |
| 0.50 | 1414.66     | 2715.50      | 4888.00      | 10058.28     |      |         |         |         |         |

Table S360: Critical values for detector  $\hat{H}_{mov,sn}^{m,0.1}$  with windows size  $n = 0.1$ , and FM-OLS and D-OLS estimation in a model with intercept and linear trend. The number of integrated regressors is 2 and the highest power of  $x_{kt}$  is 2.

| m    | 90 %         | 95 %         | 97,5 %       | 99 %          | m    | 90 %    | 95 %    | 97,5 %   | 99 %     |
|------|--------------|--------------|--------------|---------------|------|---------|---------|----------|----------|
| 0.10 | 209337299.24 | 472543871.58 | 969048944.04 | 2241850754.37 | 0.51 | 4619.03 | 9512.38 | 18243.45 | 39889.71 |
| 0.11 | 118425950.58 | 267348974.43 | 543720363.48 | 1290962224.65 | 0.52 | 3914.02 | 8044.03 | 15402.76 | 34070.75 |
| 0.12 | 70418303.36  | 157299964.25 | 331707689.16 | 759211800.31  | 0.53 | 3334.64 | 6786.31 | 13041.40 | 28743.71 |
| 0.13 | 44029999.63  | 97701421.33  | 199852717.90 | 461568054.93  | 0.54 | 2826.76 | 5655.55 | 10987.17 | 24125.99 |
| 0.14 | 27907151.20  | 61808727.02  | 127589264.16 | 295236341.33  | 0.55 | 2410.22 | 4786.97 | 9199.77  | 20160.89 |
| 0.15 | 18680591.45  | 41295058.16  | 84911244.04  | 201137758.26  | 0.56 | 2042.83 | 4035.29 | 7817.98  | 17195.75 |
| 0.16 | 12564803.01  | 27890481.10  | 57866491.02  | 135752984.22  | 0.57 | 1735.73 | 3418.96 | 6605.96  | 14513.05 |
| 0.17 | 8586783.55   | 19196939.15  | 40285873.98  | 95243583.84   | 0.58 | 1480.23 | 2929.43 | 5547.40  | 12283.63 |
| 0.18 | 6128626.45   | 13418331.15  | 28089480.34  | 66446185.66   | 0.59 | 1274.53 | 2491.21 | 4682.85  | 10627.88 |
| 0.19 | 4412892.06   | 9657576.06   | 19637191.49  | 45748504.68   | 0.60 | 1086.93 | 2131.00 | 4010.92  | 8853.09  |
| 0.20 | 3243666.23   | 7069401.95   | 14352705.58  | 33874239.25   | 0.61 | 929.58  | 1821.50 | 3395.14  | 7607.06  |
| 0.21 | 2389115.77   | 5203198.75   | 10594961.80  | 24653375.66   | 0.62 | 791.16  | 1547.56 | 2893.09  | 6382.68  |
| 0.22 | 1774360.52   | 3885191.01   | 7963283.32   | 18413939.34   | 0.63 | 674.74  | 1306.09 | 2450.94  | 5353.29  |
| 0.23 | 1316896.99   | 2912375.81   | 5947833.64   | 13944104.71   | 0.64 | 578.36  | 1110.11 | 2060.37  | 4491.10  |
| 0.24 | 998260.34    | 2191493.63   | 4496215.57   | 10286494.90   | 0.65 | 490.82  | 943.78  | 1747.01  | 3741.05  |
| 0.25 | 780474.39    | 1690841.96   | 3386564.17   | 7833731.36    | 0.66 | 417.52  | 800.66  | 1462.58  | 3185.98  |
| 0.26 | 608354.34    | 1305592.08   | 2660079.72   | 6204299.15    | 0.67 | 355.59  | 673.39  | 1224.03  | 2642.76  |
| 0.27 | 469055.42    | 1030622.08   | 2080283.02   | 4760464.60    | 0.68 | 303.82  | 563.43  | 1016.55  | 2173.30  |
| 0.28 | 368505.68    | 807720.47    | 1629784.31   | 3724966.41    | 0.69 | 256.74  | 479.02  | 858.38   | 1797.77  |
| 0.29 | 289735.77    | 636673.47    | 1262622.43   | 2890241.23    | 0.70 | 219.24  | 405.82  | 720.28   | 1477.20  |
| 0.30 | 233551.73    | 506968.62    | 995526.09    | 2262533.24    | 0.71 | 185.32  | 341.64  | 598.50   | 1235.28  |
| 0.31 | 185074.81    | 398489.48    | 807153.40    | 1800447.23    | 0.72 | 156.28  | 286.71  | 503.94   | 1024.76  |
| 0.32 | 148716.07    | 319515.68    | 636122.89    | 1456784.59    | 0.73 | 132.53  | 242.48  | 428.45   | 871.04   |
| 0.33 | 120122.79    | 256607.69    | 515215.48    | 1201362.45    | 0.74 | 112.03  | 204.32  | 358.93   | 711.59   |
| 0.34 | 98056.16     | 209320.73    | 420943.57    | 973485.58     | 0.75 | 94.77   | 169.95  | 297.86   | 588.40   |
| 0.35 | 80296.59     | 170633.74    | 345361.65    | 803147.08     | 0.76 | 79.54   | 142.01  | 243.61   | 490.20   |
| 0.36 | 65757.64     | 141277.12    | 287030.70    | 650374.40     | 0.77 | 66.34   | 118.79  | 199.59   | 399.32   |
| 0.37 | 54012.53     | 115718.69    | 233871.00    | 537501.80     | 0.78 | 55.29   | 97.43   | 165.27   | 321.47   |
| 0.38 | 44967.81     | 95140.25     | 193057.38    | 442984.75     | 0.79 | 45.84   | 80.59   | 135.41   | 256.93   |
| 0.39 | 37031.94     | 78836.90     | 158483.63    | 373519.09     | 0.80 | 37.81   | 65.78   | 109.63   | 204.04   |
| 0.40 | 31152.03     | 64515.95     | 133433.49    | 304410.59     | 0.81 | 31.19   | 53.70   | 87.86    | 162.97   |
| 0.41 | 25924.67     | 54108.70     | 108900.24    | 250806.89     | 0.82 | 25.76   | 43.63   | 70.63    | 127.66   |
| 0.42 | 21439.67     | 44927.65     | 89409.31     | 206226.41     | 0.83 | 21.08   | 35.41   | 56.53    | 100.46   |
| 0.43 | 17754.95     | 37322.64     | 74241.83     | 172269.57     | 0.84 | 17.24   | 28.52   | 45.13    | 79.77    |
| 0.44 | 14965.72     | 31550.75     | 62322.78     | 143416.58     | 0.85 | 13.90   | 22.86   | 35.80    | 61.56    |
| 0.45 | 12692.82     | 26520.37     | 51389.08     | 117616.35     | 0.86 | 11.20   | 18.17   | 27.92    | 47.29    |
| 0.46 | 10681.19     | 22050.96     | 42459.16     | 98867.69      | 0.87 | 8.96    | 14.24   | 21.73    | 36.44    |
| 0.47 | 8954.73      | 18502.52     | 35812.11     | 80353.08      | 0.88 | 7.05    | 11.16   | 16.76    | 27.58    |
| 0.48 | 7595.50      | 15604.86     | 30622.73     | 67695.86      | 0.89 | 5.55    | 8.60    | 12.70    | 20.44    |
| 0.49 | 6419.67      | 13228.18     | 25800.28     | 56665.85      | 0.90 | 4.27    | 6.55    | 9.52     | 14.90    |
| 0.50 | 5430.84      | 11151.94     | 21674.37     | 47541.50      |      |         |         |          |          |

Table S361: Critical values for detector  $\hat{H}_{mov,sn}^{m,0.1}$  with windows size  $n = 0.1$ , and IM-OLS estimation in a model with intercept and linear trend. The number of integrated regressors is 2 and the highest power of  $x_{kt}$  is 2.

| m    | 90 %        | 95 %         | 97,5 %       | 99 %         | m    | 90 %    | 95 %    | 97,5 %  | 99 %     |
|------|-------------|--------------|--------------|--------------|------|---------|---------|---------|----------|
| 0.10 | 64662628.61 | 137732617.50 | 275398263.73 | 612016697.53 | 0.51 | 1696.09 | 3214.66 | 5841.59 | 11794.58 |
| 0.11 | 37426881.50 | 79241197.79  | 158219244.75 | 357532396.88 | 0.52 | 1429.38 | 2722.88 | 4819.30 | 9880.55  |
| 0.12 | 22795550.71 | 47709847.18  | 95350826.43  | 214354872.61 | 0.53 | 1200.95 | 2267.55 | 3998.92 | 8399.17  |
| 0.13 | 14201522.05 | 29658299.51  | 58551200.68  | 129463304.51 | 0.54 | 1019.90 | 1927.28 | 3345.93 | 6993.64  |
| 0.14 | 9352841.76  | 19239223.04  | 38347810.61  | 86345691.83  | 0.55 | 865.08  | 1609.37 | 2844.48 | 5910.52  |
| 0.15 | 6289138.57  | 12854795.67  | 25093073.45  | 56880815.21  | 0.56 | 729.62  | 1376.01 | 2403.24 | 4925.30  |
| 0.16 | 4249812.61  | 8777892.58   | 16984209.83  | 39462489.65  | 0.57 | 623.66  | 1176.92 | 2064.85 | 4192.12  |
| 0.17 | 2983988.98  | 6199721.65   | 11852984.70  | 26979550.23  | 0.58 | 531.09  | 990.26  | 1715.04 | 3542.33  |
| 0.18 | 2119886.66  | 4362382.61   | 8387757.49   | 19000622.35  | 0.59 | 448.94  | 838.21  | 1480.28 | 2937.93  |
| 0.19 | 1516725.76  | 3115820.07   | 5985685.72   | 13411275.00  | 0.60 | 383.84  | 712.51  | 1254.81 | 2473.87  |
| 0.20 | 1119068.48  | 2269784.05   | 4387734.72   | 9934512.26   | 0.61 | 329.82  | 605.41  | 1060.34 | 2079.37  |
| 0.21 | 816694.59   | 1671060.96   | 3227107.03   | 7115603.46   | 0.62 | 278.97  | 511.04  | 884.98  | 1768.41  |
| 0.22 | 619063.92   | 1256483.69   | 2433472.49   | 5212667.54   | 0.63 | 238.17  | 440.75  | 768.67  | 1487.77  |
| 0.23 | 469099.11   | 951609.93    | 1833468.06   | 3950637.34   | 0.64 | 202.25  | 370.08  | 635.12  | 1251.16  |
| 0.24 | 357889.49   | 729266.64    | 1397389.63   | 2992311.87   | 0.65 | 171.13  | 310.91  | 530.24  | 1004.39  |
| 0.25 | 275843.27   | 555668.32    | 1069125.59   | 2302294.20   | 0.66 | 145.20  | 260.65  | 444.76  | 844.74   |
| 0.26 | 212832.51   | 433328.41    | 843663.18    | 1812831.43   | 0.67 | 122.91  | 220.93  | 372.93  | 702.41   |
| 0.27 | 168144.22   | 343222.33    | 649901.53    | 1429458.77   | 0.68 | 103.50  | 185.20  | 309.07  | 588.11   |
| 0.28 | 133993.48   | 271754.43    | 514233.61    | 1132527.62   | 0.69 | 87.89   | 157.25  | 262.32  | 495.60   |
| 0.29 | 106364.11   | 214402.15    | 406191.18    | 906271.64    | 0.70 | 74.04   | 131.05  | 217.04  | 409.93   |
| 0.30 | 84647.42    | 171583.92    | 330303.00    | 691456.57    | 0.71 | 62.71   | 109.38  | 182.95  | 341.14   |
| 0.31 | 68748.06    | 136682.22    | 258003.73    | 559837.41    | 0.72 | 52.52   | 92.12   | 150.12  | 277.87   |
| 0.32 | 54914.59    | 109886.34    | 208047.70    | 437419.82    | 0.73 | 43.82   | 75.46   | 127.16  | 235.37   |
| 0.33 | 44183.32    | 88017.34     | 163555.76    | 344411.20    | 0.74 | 36.40   | 63.04   | 102.75  | 187.71   |
| 0.34 | 36434.15    | 71635.87     | 129788.18    | 278903.70    | 0.75 | 30.14   | 51.79   | 84.57   | 153.50   |
| 0.35 | 29471.20    | 58384.90     | 107799.90    | 221775.30    | 0.76 | 25.38   | 42.75   | 68.76   | 124.48   |
| 0.36 | 24083.49    | 48193.61     | 88627.50     | 186396.85    | 0.77 | 20.76   | 35.42   | 56.93   | 102.39   |
| 0.37 | 19917.91    | 40034.30     | 73750.06     | 153049.62    | 0.78 | 17.23   | 28.85   | 45.99   | 79.96    |
| 0.38 | 16325.59    | 32655.77     | 60957.39     | 129171.01    | 0.79 | 14.12   | 23.72   | 37.42   | 63.14    |
| 0.39 | 13378.35    | 26916.75     | 50504.21     | 103692.28    | 0.80 | 11.41   | 19.09   | 29.69   | 50.55    |
| 0.40 | 11206.28    | 22325.08     | 42340.99     | 87150.59     | 0.81 | 9.30    | 15.26   | 23.75   | 40.18    |
| 0.41 | 9311.69     | 18538.35     | 34655.28     | 73900.76     | 0.82 | 7.56    | 12.31   | 18.97   | 31.31    |
| 0.42 | 7851.82     | 15476.29     | 28914.96     | 61497.79     | 0.83 | 6.09    | 10.00   | 14.94   | 24.39    |
| 0.43 | 6597.04     | 12909.01     | 23904.25     | 50510.49     | 0.84 | 4.90    | 7.85    | 11.66   | 19.18    |
| 0.44 | 5549.79     | 10845.34     | 19907.31     | 41408.86     | 0.85 | 3.88    | 6.13    | 9.19    | 14.59    |
| 0.45 | 4643.66     | 9045.80      | 16339.48     | 34329.22     | 0.86 | 3.07    | 4.89    | 7.20    | 11.05    |
| 0.46 | 3888.64     | 7543.91      | 13572.37     | 29163.10     | 0.87 | 2.40    | 3.78    | 5.56    | 8.58     |
| 0.47 | 3293.43     | 6403.20      | 11703.17     | 24532.59     | 0.88 | 1.89    | 2.90    | 4.20    | 6.31     |
| 0.48 | 2788.02     | 5329.37      | 9723.89      | 20494.35     | 0.89 | 1.45    | 2.21    | 3.16    | 4.76     |
| 0.49 | 2346.83     | 4497.29      | 8195.17      | 16827.35     | 0.90 | 1.12    | 1.66    | 2.34    | 3.53     |
| 0.50 | 1998.53     | 3831.53      | 6841.96      | 13825.35     |      |         |         |         |          |

Table S362: Critical values for detector  $\hat{H}_{mov,sn}^{m,0.2}$  with windows size  $n = 0.2$ , and FM-OLS and D-OLS estimation in a model with intercept and linear trend. The number of integrated regressors is 2 and the highest power of  $x_{kt}$  is 2.

| m    | 90 %         | 95 %         | 97,5 %        | 99 %          | m    | 90 %    | 95 %     | 97,5 %   | 99 %     |
|------|--------------|--------------|---------------|---------------|------|---------|----------|----------|----------|
| 0.10 | 276644566.99 | 626002019.14 | 1290390633.56 | 2987089217.35 | 0.51 | 6504.21 | 13181.23 | 25230.46 | 55611.77 |
| 0.11 | 158054557.69 | 354330002.90 | 735563622.74  | 1756446183.03 | 0.52 | 5465.25 | 11143.33 | 21196.74 | 46489.22 |
| 0.12 | 94513165.92  | 210693703.86 | 450394760.59  | 1032040148.61 | 0.53 | 4630.96 | 9397.24  | 17942.93 | 39586.94 |
| 0.13 | 59565813.95  | 131877980.69 | 272189222.89  | 625474697.16  | 0.54 | 3918.33 | 7794.03  | 15023.72 | 32827.77 |
| 0.14 | 38148134.96  | 84947023.74  | 175346607.87  | 407158360.67  | 0.55 | 3330.91 | 6543.83  | 12596.92 | 27143.83 |
| 0.15 | 25763587.24  | 56620974.44  | 117486984.26  | 278545328.34  | 0.56 | 2815.05 | 5518.84  | 10561.93 | 22856.03 |
| 0.16 | 17379779.89  | 38785076.83  | 80244056.15   | 191496729.89  | 0.57 | 2381.64 | 4653.18  | 8876.44  | 19587.57 |
| 0.17 | 12007137.44  | 26742967.36  | 56106699.04   | 134381950.34  | 0.58 | 2019.13 | 3978.63  | 7485.46  | 16443.97 |
| 0.18 | 8596203.31   | 18687080.93  | 39267543.94   | 93187519.01   | 0.59 | 1723.12 | 3370.77  | 6231.77  | 13897.30 |
| 0.19 | 6221224.04   | 13541724.08  | 27565887.40   | 65211826.01   | 0.60 | 1466.32 | 2866.28  | 5319.96  | 11585.92 |
| 0.20 | 4577506.56   | 9940327.75   | 20218366.41   | 47664892.46   | 0.61 | 1248.17 | 2424.98  | 4494.57  | 9785.84  |
| 0.21 | 3375369.91   | 7393171.55   | 14997806.26   | 34860874.39   | 0.62 | 1056.99 | 2039.09  | 3790.48  | 8321.94  |
| 0.22 | 2511787.19   | 5576563.20   | 11361388.01   | 26041818.13   | 0.63 | 893.67  | 1714.84  | 3209.83  | 6836.98  |
| 0.23 | 1863980.03   | 4141184.54   | 8476293.27    | 19916343.82   | 0.64 | 760.19  | 1453.23  | 2660.89  | 5778.79  |
| 0.24 | 1428016.94   | 3130437.45   | 6407877.63    | 14678441.22   | 0.65 | 643.79  | 1220.84  | 2249.21  | 4789.00  |
| 0.25 | 1117655.90   | 2410000.72   | 4874121.45    | 11372322.42   | 0.66 | 544.09  | 1033.10  | 1873.57  | 4026.32  |
| 0.26 | 873165.52    | 1864966.31   | 3813034.38    | 8887682.89    | 0.67 | 460.98  | 861.91   | 1549.27  | 3287.55  |
| 0.27 | 677784.28    | 1481486.94   | 2991668.55    | 6866022.60    | 0.68 | 389.70  | 715.91   | 1276.22  | 2703.38  |
| 0.28 | 532770.89    | 1161519.43   | 2333075.45    | 5357442.97    | 0.69 | 327.95  | 599.99   | 1065.60  | 2213.83  |
| 0.29 | 417110.91    | 912773.69    | 1831409.10    | 4157974.28    | 0.70 | 276.74  | 505.43   | 882.85   | 1798.86  |
| 0.30 | 335451.30    | 726820.81    | 1429836.73    | 3287064.29    | 0.71 | 232.18  | 420.72   | 731.76   | 1476.72  |
| 0.31 | 267001.31    | 572284.56    | 1157757.54    | 2583851.26    | 0.72 | 195.06  | 353.27   | 604.22   | 1237.23  |
| 0.32 | 214424.78    | 460286.37    | 920136.47     | 2096790.01    | 0.73 | 163.21  | 292.91   | 513.53   | 1015.93  |
| 0.33 | 173865.17    | 369617.07    | 744255.13     | 1748763.94    | 0.74 | 136.36  | 245.99   | 425.03   | 827.34   |
| 0.34 | 141206.29    | 302767.12    | 604808.62     | 1397741.83    | 0.75 | 114.39  | 201.89   | 348.54   | 680.21   |
| 0.35 | 115833.37    | 246002.33    | 494701.36     | 1159922.87    | 0.76 | 94.84   | 167.07   | 284.24   | 562.28   |
| 0.36 | 94630.05     | 203233.57    | 409283.45     | 931597.61     | 0.77 | 78.22   | 137.45   | 229.92   | 454.48   |
| 0.37 | 77950.12     | 166226.60    | 335722.93     | 769832.39     | 0.78 | 64.52   | 111.92   | 186.06   | 358.05   |
| 0.38 | 64818.38     | 136289.11    | 276451.25     | 632720.32     | 0.79 | 52.87   | 91.23    | 151.91   | 283.11   |
| 0.39 | 53150.31     | 112524.63    | 226985.50     | 537620.36     | 0.80 | 43.09   | 74.06    | 120.83   | 221.39   |
| 0.40 | 44668.66     | 92417.36     | 188466.36     | 429828.54     | 0.81 | 34.98   | 59.68    | 96.25    | 176.02   |
| 0.41 | 37141.89     | 77322.15     | 154793.55     | 358758.29     | 0.82 | 28.50   | 47.78    | 76.01    | 135.98   |
| 0.42 | 30708.35     | 63820.62     | 126611.49     | 289040.12     | 0.83 | 23.08   | 38.24    | 60.47    | 106.66   |
| 0.43 | 25434.22     | 52940.38     | 105136.59     | 245135.96     | 0.84 | 18.61   | 30.42    | 47.90    | 83.73    |
| 0.44 | 21460.37     | 44568.21     | 88162.25      | 202623.18     | 0.85 | 14.85   | 24.14    | 37.45    | 63.84    |
| 0.45 | 17994.11     | 37630.41     | 72103.67      | 166020.27     | 0.86 | 11.81   | 18.96    | 28.99    | 48.79    |
| 0.46 | 15139.74     | 31253.70     | 59199.31      | 138222.09     | 0.87 | 9.33    | 14.74    | 22.29    | 37.15    |
| 0.47 | 12708.37     | 25948.33     | 50181.52      | 113494.97     | 0.88 | 7.30    | 11.45    | 17.12    | 28.00    |
| 0.48 | 10762.80     | 21862.65     | 43009.57      | 93299.11      | 0.89 | 5.70    | 8.77     | 12.88    | 20.64    |
| 0.49 | 9038.24      | 18592.60     | 36078.45      | 78200.16      | 0.90 | 4.39    | 6.67     | 9.65     | 15.00    |
| 0.50 | 7669.35      | 15503.67     | 30019.51      | 65560.55      |      |         |          |          |          |

Table S363: Critical values for detector  $\hat{H}_{mov,sn}^{m,0.2}$  with windows size  $n = 0.2$ , and IM-OLS estimation in a model with intercept and linear trend. The number of integrated regressors is 2 and the highest power of  $x_{kt}$  is 2.

| m    | 90 %        | 95 %         | 97,5 %       | 99 %         | m    | 90 %    | 95 %    | 97,5 %  | 99 %     |
|------|-------------|--------------|--------------|--------------|------|---------|---------|---------|----------|
| 0.10 | 71012067.13 | 150705791.30 | 300094164.74 | 670160046.56 | 0.51 | 1856.68 | 3512.15 | 6335.65 | 12805.94 |
| 0.11 | 41181541.14 | 87293380.69  | 174102745.92 | 396937147.27 | 0.52 | 1562.00 | 2967.93 | 5208.88 | 10649.69 |
| 0.12 | 25219912.97 | 52365393.11  | 105186374.88 | 236531464.56 | 0.53 | 1305.42 | 2460.03 | 4340.59 | 9015.77  |
| 0.13 | 15790494.60 | 32842213.85  | 64039235.10  | 143409268.61 | 0.54 | 1108.26 | 2083.52 | 3601.22 | 7477.86  |
| 0.14 | 10419448.77 | 21281527.17  | 42544714.03  | 95445703.56  | 0.55 | 937.20  | 1734.26 | 3067.85 | 6309.60  |
| 0.15 | 7005229.72  | 14246357.27  | 27810390.39  | 62671860.99  | 0.56 | 786.03  | 1479.81 | 2562.56 | 5211.74  |
| 0.16 | 4762947.83  | 9800294.51   | 18839433.58  | 44243478.29  | 0.57 | 671.31  | 1259.78 | 2203.09 | 4428.54  |
| 0.17 | 3333739.63  | 6896647.07   | 13196861.34  | 30096725.24  | 0.58 | 570.93  | 1060.88 | 1821.00 | 3750.20  |
| 0.18 | 2380247.58  | 4887719.06   | 9353669.77   | 21058685.52  | 0.59 | 478.65  | 888.85  | 1567.19 | 3109.11  |
| 0.19 | 1708255.21  | 3474544.43   | 6695050.08   | 15057722.63  | 0.60 | 408.36  | 757.64  | 1316.03 | 2573.91  |
| 0.20 | 1260238.27  | 2530774.02   | 4944680.38   | 11169818.56  | 0.61 | 349.61  | 639.18  | 1118.57 | 2176.52  |
| 0.21 | 918743.79   | 1885950.72   | 3605887.97   | 8068861.71   | 0.62 | 294.61  | 536.75  | 927.15  | 1845.20  |
| 0.22 | 698260.16   | 1418241.30   | 2721581.65   | 5879897.15   | 0.63 | 250.37  | 460.70  | 804.95  | 1553.34  |
| 0.23 | 529979.34   | 1073004.79   | 2067851.20   | 4453835.65   | 0.64 | 213.00  | 386.56  | 660.19  | 1292.05  |
| 0.24 | 405037.35   | 821281.55    | 1567699.86   | 3374888.93   | 0.65 | 178.84  | 323.36  | 549.68  | 1039.92  |
| 0.25 | 312086.07   | 628393.21    | 1209339.40   | 2580327.30   | 0.66 | 151.21  | 270.02  | 456.20  | 871.71   |
| 0.26 | 241195.01   | 488801.09    | 945577.40    | 2074160.29   | 0.67 | 127.25  | 227.79  | 383.12  | 717.86   |
| 0.27 | 190589.28   | 386604.22    | 730480.22    | 1605027.14   | 0.68 | 106.89  | 190.89  | 317.46  | 597.11   |
| 0.28 | 151597.56   | 306634.32    | 578729.56    | 1283390.53   | 0.69 | 90.23   | 160.93  | 267.48  | 504.24   |
| 0.29 | 120576.80   | 240437.06    | 455792.33    | 1012943.46   | 0.70 | 75.76   | 133.63  | 220.59  | 413.10   |
| 0.30 | 96040.05    | 193381.69    | 370419.59    | 777225.80    | 0.71 | 63.87   | 111.50  | 185.36  | 343.61   |
| 0.31 | 77767.49    | 154018.73    | 290485.69    | 633507.13    | 0.72 | 53.48   | 93.19   | 151.90  | 280.29   |
| 0.32 | 62071.50    | 124353.71    | 233065.51    | 491465.13    | 0.73 | 44.38   | 76.23   | 128.19  | 236.42   |
| 0.33 | 49908.27    | 99225.87     | 182751.73    | 384553.49    | 0.74 | 36.83   | 63.49   | 103.47  | 188.78   |
| 0.34 | 41033.08    | 80831.93     | 146123.18    | 313598.86    | 0.75 | 30.40   | 52.19   | 85.07   | 154.13   |
| 0.35 | 33171.75    | 65677.83     | 120282.77    | 249404.35    | 0.76 | 25.52   | 42.90   | 68.87   | 124.86   |
| 0.36 | 27093.27    | 54095.51     | 98246.10     | 207484.38    | 0.77 | 20.89   | 35.56   | 57.12   | 102.52   |
| 0.37 | 22453.95    | 44521.20     | 82361.90     | 171086.76    | 0.78 | 17.32   | 28.97   | 46.08   | 80.06    |
| 0.38 | 18308.56    | 36501.61     | 67910.36     | 143750.02    | 0.79 | 14.21   | 23.81   | 37.53   | 63.19    |
| 0.39 | 15003.11    | 30208.34     | 56058.52     | 115805.73    | 0.80 | 11.51   | 19.19   | 29.80   | 50.65    |
| 0.40 | 12560.10    | 25033.35     | 46963.25     | 96618.36     | 0.81 | 9.41    | 15.37   | 23.87   | 40.30    |
| 0.41 | 10425.91    | 20610.17     | 38530.82     | 82127.14     | 0.82 | 7.68    | 12.43   | 19.08   | 31.44    |
| 0.42 | 8763.02     | 17198.26     | 32064.67     | 67736.03     | 0.83 | 6.21    | 10.11   | 15.07   | 24.52    |
| 0.43 | 7337.80     | 14352.64     | 26505.61     | 56001.35     | 0.84 | 5.03    | 7.96    | 11.78   | 19.36    |
| 0.44 | 6177.94     | 12029.36     | 22012.45     | 45835.61     | 0.85 | 3.99    | 6.25    | 9.32    | 14.74    |
| 0.45 | 5155.91     | 9986.97      | 17997.39     | 38009.22     | 0.86 | 3.19    | 5.00    | 7.32    | 11.17    |
| 0.46 | 4310.80     | 8354.28      | 14841.75     | 31739.94     | 0.87 | 2.52    | 3.90    | 5.67    | 8.71     |
| 0.47 | 3634.90     | 7043.17      | 12840.78     | 26806.22     | 0.88 | 2.01    | 3.02    | 4.32    | 6.45     |
| 0.48 | 3084.43     | 5861.69      | 10695.58     | 22120.51     | 0.89 | 1.58    | 2.33    | 3.29    | 4.86     |
| 0.49 | 2580.70     | 4928.42      | 8965.49      | 18154.11     | 0.90 | 1.25    | 1.78    | 2.46    | 3.65     |
| 0.50 | 2193.25     | 4174.45      | 7465.51      | 14934.65     |      |         |         |         |          |

Table S364: Critical values for detector  $\hat{H}_{mov,sn}^{m,0.3}$  with windows size  $n = 0.3$ , and FM-OLS and D-OLS estimation in a model with intercept and linear trend. The number of integrated regressors is 2 and the highest power of  $x_{kt}$  is 2.

| m    | 90 %         | 95 %         | 97,5 %        | 99 %          | m    | 90 %    | 95 %     | 97,5 %   | 99 %     |
|------|--------------|--------------|---------------|---------------|------|---------|----------|----------|----------|
| 0.10 | 303001942.55 | 685470438.31 | 1403769702.07 | 3254789247.56 | 0.51 | 7114.21 | 14286.79 | 27203.03 | 59843.13 |
| 0.11 | 174001805.51 | 388022776.42 | 800454409.01  | 1919740291.79 | 0.52 | 5957.84 | 12085.30 | 22986.32 | 49973.00 |
| 0.12 | 103712034.44 | 230118070.85 | 493724545.41  | 1137312335.56 | 0.53 | 5028.15 | 10181.43 | 19310.14 | 42659.72 |
| 0.13 | 65804748.90  | 145662954.31 | 300801857.49  | 694653945.96  | 0.54 | 4251.53 | 8413.99  | 16027.47 | 35120.00 |
| 0.14 | 42270655.07  | 93817013.29  | 193770349.77  | 447475587.39  | 0.55 | 3592.51 | 7028.34  | 13447.57 | 28850.40 |
| 0.15 | 28514551.59  | 62551155.50  | 130231885.56  | 307553552.34  | 0.56 | 3031.13 | 5896.81  | 11221.76 | 24077.56 |
| 0.16 | 19420947.05  | 43061115.82  | 89212037.62   | 211751843.12  | 0.57 | 2555.51 | 4975.10  | 9438.67  | 20679.06 |
| 0.17 | 13416048.46  | 29651791.52  | 62032084.89   | 149211169.57  | 0.58 | 2164.41 | 4242.24  | 7941.18  | 17289.62 |
| 0.18 | 9613747.52   | 20764227.60  | 43268120.05   | 103231811.24  | 0.59 | 1841.46 | 3582.22  | 6566.76  | 14557.52 |
| 0.19 | 6931868.20   | 15125845.20  | 30650101.60   | 72973154.94   | 0.60 | 1565.58 | 3040.12  | 5607.21  | 12072.61 |
| 0.20 | 5117058.04   | 11094075.53  | 22534608.58   | 53286340.62   | 0.61 | 1324.99 | 2563.43  | 4696.18  | 10180.60 |
| 0.21 | 3787669.60   | 8229997.57   | 16769435.65   | 39037465.91   | 0.62 | 1115.79 | 2143.36  | 3965.65  | 8598.02  |
| 0.22 | 2816379.59   | 6239062.42   | 12696808.90   | 29095641.65   | 0.63 | 943.63  | 1790.94  | 3337.45  | 7064.57  |
| 0.23 | 2103476.41   | 4648751.39   | 9512220.76    | 22282441.80   | 0.64 | 796.23  | 1512.50  | 2756.59  | 5952.39  |
| 0.24 | 1599184.73   | 3494759.36   | 7166496.94    | 16484714.08   | 0.65 | 670.36  | 1273.44  | 2325.12  | 4903.38  |
| 0.25 | 1253019.18   | 2702865.17   | 5465039.87    | 12682814.81   | 0.66 | 566.43  | 1072.80  | 1927.25  | 4138.89  |
| 0.26 | 982415.24    | 2092529.38   | 4260890.06    | 9957139.03    | 0.67 | 477.99  | 889.35   | 1595.42  | 3360.39  |
| 0.27 | 763038.36    | 1650951.85   | 3335854.52    | 7762524.83    | 0.68 | 401.99  | 735.69   | 1307.89  | 2758.71  |
| 0.28 | 601004.93    | 1295185.64   | 2611008.26    | 6066792.73    | 0.69 | 337.32  | 614.15   | 1088.44  | 2247.80  |
| 0.29 | 466768.06    | 1027629.78   | 2041928.80    | 4614018.25    | 0.70 | 283.45  | 515.87   | 900.14   | 1825.68  |
| 0.30 | 375243.06    | 810907.83    | 1600787.03    | 3662986.50    | 0.71 | 237.00  | 428.32   | 741.46   | 1499.64  |
| 0.31 | 300808.30    | 644320.01    | 1290925.07    | 2901607.31    | 0.72 | 198.58  | 358.56   | 614.34   | 1250.93  |
| 0.32 | 241706.64    | 513612.40    | 1028283.88    | 2352084.59    | 0.73 | 165.70  | 296.12   | 518.15   | 1024.29  |
| 0.33 | 195735.98    | 413842.20    | 835048.13     | 1942159.61    | 0.74 | 138.03  | 248.65   | 428.31   | 833.03   |
| 0.34 | 158518.84    | 339538.04    | 679366.54     | 1579708.07    | 0.75 | 115.42  | 203.38   | 350.02   | 682.75   |
| 0.35 | 129835.35    | 275593.08    | 548567.44     | 1298581.43    | 0.76 | 95.62   | 168.17   | 285.47   | 563.73   |
| 0.36 | 106240.18    | 227432.32    | 455681.61     | 1031529.92    | 0.77 | 78.64   | 138.02   | 230.44   | 454.84   |
| 0.37 | 87184.05     | 185616.14    | 373354.86     | 852028.60     | 0.78 | 64.80   | 112.26   | 186.18   | 358.39   |
| 0.38 | 72449.50     | 152544.68    | 305470.22     | 701887.47     | 0.79 | 53.04   | 91.37    | 152.12   | 283.37   |
| 0.39 | 59243.44     | 125088.24    | 252141.90     | 596285.08     | 0.80 | 43.20   | 74.18    | 121.03   | 221.51   |
| 0.40 | 49708.66     | 102886.86    | 207822.54     | 474434.99     | 0.81 | 35.10   | 59.79    | 96.34    | 176.14   |
| 0.41 | 41397.46     | 85843.12     | 170537.50     | 396225.72     | 0.82 | 28.63   | 47.87    | 76.11    | 136.05   |
| 0.42 | 34261.03     | 70817.24     | 139975.76     | 320221.47     | 0.83 | 23.20   | 38.38    | 60.56    | 106.77   |
| 0.43 | 28358.97     | 58649.21     | 115952.57     | 266263.96     | 0.84 | 18.74   | 30.56    | 48.02    | 83.83    |
| 0.44 | 23737.33     | 49454.29     | 97039.82      | 222029.10     | 0.85 | 14.96   | 24.24    | 37.52    | 63.96    |
| 0.45 | 19894.83     | 41403.89     | 78603.55      | 182205.21     | 0.86 | 11.93   | 19.09    | 29.10    | 48.90    |
| 0.46 | 16721.95     | 34251.92     | 65051.94      | 151929.58     | 0.87 | 9.45    | 14.84    | 22.40    | 37.26    |
| 0.47 | 13995.13     | 28443.27     | 54733.92      | 123938.18     | 0.88 | 7.42    | 11.57    | 17.24    | 28.10    |
| 0.48 | 11857.45     | 24081.56     | 46871.27      | 102212.91     | 0.89 | 5.81    | 8.90     | 12.99    | 20.75    |
| 0.49 | 9930.12      | 20292.00     | 39126.79      | 84832.83      | 0.90 | 4.49    | 6.77     | 9.74     | 15.10    |
| 0.50 | 8397.63      | 16989.30     | 32752.97      | 70629.54      |      |         |          |          |          |

Table S365: Critical values for detector  $\hat{H}_{mov,sn}^{m,0.3}$  with windows size  $n = 0.3$ , and IM-OLS estimation in a model with intercept and linear trend. The number of integrated regressors is 2 and the highest power of  $x_{kt}$  is 2.

| m    | 90 %          | 95 %          | 97,5 %         | 99 %           | m    | 90 %    | 95 %     | 97,5 %   | 99 %      |
|------|---------------|---------------|----------------|----------------|------|---------|----------|----------|-----------|
| 0.10 | 1285000535.67 | 4604999654.35 | 13453305227.23 | 44633347749.23 | 0.51 | 4810.29 | 16801.66 | 48499.96 | 147398.42 |
| 0.11 | 683079564.85  | 2398212486.52 | 6920626066.82  | 22928593531.64 | 0.52 | 3937.18 | 13874.61 | 38611.46 | 119594.71 |
| 0.12 | 391195175.23  | 1408748032.22 | 3934406888.30  | 13332656463.15 | 0.53 | 3124.16 | 11100.64 | 30879.70 | 97749.15  |
| 0.13 | 228583633.07  | 821883138.78  | 2359434589.10  | 7716581089.52  | 0.54 | 2577.43 | 9098.49  | 24761.71 | 78619.20  |
| 0.14 | 138165540.50  | 502930990.52  | 1510530423.23  | 4790438756.20  | 0.55 | 2053.85 | 7473.51  | 19984.15 | 64160.65  |
| 0.15 | 87205687.23   | 319194189.75  | 960467625.53   | 3002271282.07  | 0.56 | 1712.78 | 6111.93  | 16874.80 | 51276.91  |
| 0.16 | 54736166.32   | 201773683.29  | 589241728.43   | 2002672207.30  | 0.57 | 1368.04 | 4864.96  | 13465.92 | 39750.07  |
| 0.17 | 35721415.61   | 130076678.67  | 375776962.27   | 1311001310.22  | 0.58 | 1126.36 | 3957.56  | 10994.14 | 32994.68  |
| 0.18 | 23521908.54   | 87299078.19   | 256961658.18   | 858134654.42   | 0.59 | 919.15  | 3214.83  | 8886.92  | 26829.43  |
| 0.19 | 16279193.34   | 60317105.27   | 170883496.60   | 590954418.09   | 0.60 | 753.32  | 2570.70  | 7470.33  | 22552.14  |
| 0.20 | 11282376.83   | 41644580.43   | 122166567.43   | 397489283.60   | 0.61 | 620.88  | 2135.60  | 6037.76  | 18303.59  |
| 0.21 | 8090069.72    | 28535876.05   | 83247645.75    | 291210705.30   | 0.62 | 511.15  | 1721.41  | 4903.53  | 15036.47  |
| 0.22 | 5679151.87    | 20744876.69   | 59250218.38    | 205733917.94   | 0.63 | 419.46  | 1447.76  | 4001.56  | 11887.16  |
| 0.23 | 4180856.46    | 15204072.75   | 43159467.12    | 139467642.31   | 0.64 | 341.78  | 1142.19  | 3187.72  | 9768.85   |
| 0.24 | 2968578.91    | 11070614.53   | 31463632.23    | 102008487.40   | 0.65 | 278.02  | 913.64   | 2550.25  | 7639.88   |
| 0.25 | 2214126.26    | 8062380.03    | 23324901.42    | 74890652.94    | 0.66 | 226.57  | 747.14   | 2028.73  | 6009.50   |
| 0.26 | 1626081.56    | 5950720.71    | 17727116.13    | 56704793.64    | 0.67 | 181.11  | 600.66   | 1617.63  | 4888.58   |
| 0.27 | 1247506.82    | 4503195.21    | 13207236.39    | 42659428.90    | 0.68 | 148.76  | 483.36   | 1284.90  | 4143.71   |
| 0.28 | 941826.56     | 3467330.53    | 9910149.76     | 31963534.80    | 0.69 | 122.56  | 390.74   | 1040.12  | 3158.19   |
| 0.29 | 701840.49     | 2570303.28    | 7426634.06     | 24452287.62    | 0.70 | 99.34   | 313.96   | 819.34   | 2425.45   |
| 0.30 | 535966.97     | 1939972.75    | 5546602.71     | 18252342.49    | 0.71 | 80.44   | 259.43   | 684.70   | 1959.77   |
| 0.31 | 419905.67     | 1506329.74    | 4449815.32     | 14386727.08    | 0.72 | 66.96   | 209.31   | 543.46   | 1572.88   |
| 0.32 | 321364.24     | 1148217.82    | 3370885.47     | 11443890.16    | 0.73 | 53.25   | 164.23   | 423.12   | 1206.32   |
| 0.33 | 253030.83     | 907969.37     | 2687161.73     | 8820365.37     | 0.74 | 43.40   | 131.27   | 331.68   | 922.99    |
| 0.34 | 198754.10     | 700199.63     | 2051209.59     | 7001959.56     | 0.75 | 34.94   | 102.59   | 256.58   | 721.36    |
| 0.35 | 156065.98     | 552031.91     | 1603258.87     | 5356143.59     | 0.76 | 28.11   | 80.88    | 205.21   | 562.22    |
| 0.36 | 121444.94     | 435249.92     | 1237726.62     | 4018328.44     | 0.77 | 22.37   | 65.59    | 161.05   | 450.39    |
| 0.37 | 96430.00      | 343644.87     | 963118.73      | 3219899.30     | 0.78 | 17.79   | 50.86    | 125.73   | 353.10    |
| 0.38 | 77598.37      | 282118.97     | 774538.95      | 2540945.03     | 0.79 | 13.93   | 39.37    | 95.35    | 258.98    |
| 0.39 | 62008.68      | 219658.91     | 618897.78      | 1976965.45     | 0.80 | 11.15   | 30.38    | 73.42    | 187.01    |
| 0.40 | 48843.03      | 177571.84     | 488357.96      | 1619059.46     | 0.81 | 8.86    | 23.02    | 53.78    | 143.45    |
| 0.41 | 39860.85      | 141902.52     | 403656.70      | 1287247.80     | 0.82 | 6.98    | 17.95    | 41.48    | 111.83    |
| 0.42 | 31517.00      | 112537.96     | 321364.66      | 1041115.42     | 0.83 | 5.58    | 13.56    | 30.54    | 78.98     |
| 0.43 | 25492.37      | 92131.36      | 253570.48      | 819176.22      | 0.84 | 4.33    | 10.11    | 22.70    | 56.37     |
| 0.44 | 20248.48      | 72142.85      | 207536.52      | 644445.95      | 0.85 | 3.39    | 7.57     | 16.47    | 40.29     |
| 0.45 | 16287.23      | 58887.44      | 167312.73      | 527056.54      | 0.86 | 2.59    | 5.62     | 11.83    | 28.49     |
| 0.46 | 13389.37      | 46227.78      | 133417.31      | 421949.27      | 0.87 | 2.00    | 4.14     | 8.41     | 20.18     |
| 0.47 | 10869.92      | 38202.98      | 109962.53      | 344051.64      | 0.88 | 1.51    | 3.02     | 5.86     | 13.59     |
| 0.48 | 8884.60       | 30760.54      | 89025.13       | 282538.27      | 0.89 | 1.12    | 2.13     | 4.04     | 9.26      |
| 0.49 | 7164.36       | 24481.82      | 72106.72       | 226142.83      | 0.90 | 0.83    | 1.52     | 2.76     | 5.80      |
| 0.50 | 5794.00       | 20402.58      | 58217.67       | 187027.65      |      |         |          |          |           |

Table S366: Critical values for detector  $\hat{H}_{mov,sn}^{m,0.1}$  with windows size  $n = 0.1$ , and FM-OLS and D-OLS estimation in a model with intercept. The number of integrated regressors is 2 and the highest power of  $x_{kt}$  is 3.

| m    | 90 %           | 95 %           | 97.5 %          | 99 %            | m    | 90 %     | 95 %      | 97.5 %    | 99 %       |
|------|----------------|----------------|-----------------|-----------------|------|----------|-----------|-----------|------------|
| 0.10 | 13889642069.60 | 53442476300.41 | 157523123012.87 | 591378098521.69 | 0.51 | 47172.33 | 187110.87 | 565847.49 | 1893201.51 |
| 0.11 | 7421154755.77  | 28334172837.12 | 86909606665.79  | 304405032118.74 | 0.52 | 38373.12 | 153196.08 | 455536.75 | 1495591.65 |
| 0.12 | 4227237855.27  | 15792365926.69 | 48310958230.64  | 168269875175.52 | 0.53 | 31491.72 | 122756.62 | 363400.09 | 1229863.05 |
| 0.13 | 2394073482.56  | 9099231158.67  | 27592820314.43  | 96322064279.66  | 0.54 | 25557.12 | 98084.97  | 295905.16 | 1007463.97 |
| 0.14 | 1445796385.31  | 5448153565.50  | 16558442319.16  | 59825105329.83  | 0.55 | 21211.66 | 81219.67  | 238993.50 | 819413.26  |
| 0.15 | 885930481.89   | 3379954979.42  | 10534069472.91  | 37201758625.40  | 0.56 | 17035.21 | 65788.72  | 196164.78 | 670645.60  |
| 0.16 | 573651538.91   | 2161417703.76  | 6647986164.17   | 23707946719.33  | 0.57 | 13967.43 | 53770.91  | 161122.37 | 544880.04  |
| 0.17 | 374837765.32   | 1438881998.54  | 4384674659.07   | 15685609676.61  | 0.58 | 11477.73 | 44016.30  | 126990.74 | 445828.08  |
| 0.18 | 254850560.85   | 975102714.88   | 3040097245.55   | 10564157817.06  | 0.59 | 9352.38  | 34733.49  | 105906.25 | 361641.88  |
| 0.19 | 174169164.53   | 665941318.92   | 2050620763.53   | 7467576985.70   | 0.60 | 7540.50  | 28340.34  | 85857.14  | 289317.83  |
| 0.20 | 121243462.32   | 468190825.37   | 1438155772.07   | 5099456616.37   | 0.61 | 6124.31  | 23146.29  | 69554.47  | 231439.02  |
| 0.21 | 83669495.75    | 326927930.40   | 988840020.08    | 3605729444.87   | 0.62 | 4979.69  | 18880.31  | 56730.10  | 180255.78  |
| 0.22 | 59476965.44    | 234171072.72   | 728324853.03    | 2509324201.56   | 0.63 | 4033.48  | 15293.56  | 45643.71  | 146487.39  |
| 0.23 | 42591143.37    | 164972847.67   | 506800302.71    | 1802406993.73   | 0.64 | 3345.58  | 12293.16  | 36809.80  | 117521.15  |
| 0.24 | 31742918.13    | 119175759.23   | 368572699.22    | 1283021858.64   | 0.65 | 2719.70  | 9896.58   | 28948.96  | 91163.17   |
| 0.25 | 23602303.92    | 91274421.61    | 278606127.54    | 965224231.64    | 0.66 | 2197.71  | 7872.68   | 23114.60  | 74847.99   |
| 0.26 | 17362330.03    | 66995139.17    | 207221755.24    | 728062146.04    | 0.67 | 1760.01  | 6363.41   | 18368.56  | 59715.73   |
| 0.27 | 12761343.74    | 50330742.10    | 158294180.62    | 551056085.06    | 0.68 | 1418.77  | 5106.80   | 14642.26  | 48089.55   |
| 0.28 | 9639919.58     | 37882730.41    | 117784756.39    | 425815626.98    | 0.69 | 1131.52  | 4061.61   | 11715.54  | 38209.26   |
| 0.29 | 7235219.37     | 29084932.70    | 88301432.54     | 319657162.52    | 0.70 | 912.24   | 3281.83   | 9251.92   | 29293.73   |
| 0.30 | 5606258.14     | 22144637.52    | 67732662.00     | 236808689.94    | 0.71 | 740.53   | 2606.87   | 7272.27   | 23619.58   |
| 0.31 | 4324198.14     | 16570451.00    | 50243163.60     | 186888708.08    | 0.72 | 604.41   | 2103.01   | 5852.90   | 18802.43   |
| 0.32 | 3365466.71     | 12940723.02    | 39438345.11     | 145964889.91    | 0.73 | 479.52   | 1694.60   | 4598.09   | 14433.65   |
| 0.33 | 2587097.28     | 10048240.86    | 31577116.22     | 109707730.01    | 0.74 | 382.13   | 1313.95   | 3620.81   | 11360.64   |
| 0.34 | 2051458.00     | 7876623.25     | 24789476.36     | 86965643.47     | 0.75 | 306.34   | 1022.69   | 2870.94   | 8634.28    |
| 0.35 | 1596468.12     | 6290159.46     | 19297882.78     | 66713867.95     | 0.76 | 241.08   | 809.17    | 2237.30   | 6610.77    |
| 0.36 | 1252623.51     | 5015479.01     | 14902557.62     | 50119506.57     | 0.77 | 187.75   | 630.50    | 1698.76   | 4978.51    |
| 0.37 | 989120.80      | 3885652.36     | 11542034.30     | 38655619.02     | 0.78 | 149.77   | 484.65    | 1293.76   | 3885.66    |
| 0.38 | 789376.77      | 3052785.00     | 8965576.49      | 31042864.08     | 0.79 | 116.71   | 375.68    | 992.08    | 3085.30    |
| 0.39 | 623709.93      | 2420275.15     | 7278719.98      | 24452552.27     | 0.80 | 89.63    | 287.70    | 769.71    | 2216.36    |
| 0.40 | 496883.51      | 1933078.57     | 5886849.63      | 19321190.39     | 0.81 | 69.65    | 218.95    | 578.93    | 1693.97    |
| 0.41 | 392794.37      | 1536786.57     | 4655016.04      | 15511423.11     | 0.82 | 53.86    | 165.57    | 433.20    | 1244.96    |
| 0.42 | 315218.55      | 1237221.45     | 3786832.27      | 12362662.74     | 0.83 | 41.81    | 121.22    | 312.58    | 882.23     |
| 0.43 | 255329.99      | 991993.23      | 3018702.22      | 10319540.16     | 0.84 | 31.97    | 89.34     | 225.87    | 641.43     |
| 0.44 | 207950.95      | 813010.35      | 2430595.16      | 8228427.59      | 0.85 | 24.12    | 66.07     | 164.41    | 450.96     |
| 0.45 | 166747.95      | 640828.67      | 1954189.54      | 6781565.59      | 0.86 | 18.34    | 48.13     | 118.55    | 319.87     |
| 0.46 | 134175.85      | 523843.07      | 1578649.45      | 5513626.83      | 0.87 | 13.63    | 35.56     | 82.72     | 225.64     |
| 0.47 | 108870.77      | 422986.55      | 1270638.94      | 4463285.50      | 0.88 | 10.12    | 25.16     | 57.78     | 149.25     |
| 0.48 | 88417.28       | 338614.42      | 1033750.98      | 3612072.07      | 0.89 | 7.47     | 17.62     | 39.21     | 100.21     |
| 0.49 | 72059.02       | 273747.62      | 861643.74       | 2838895.15      | 0.90 | 5.54     | 12.27     | 26.62     | 65.44      |
| 0.50 | 57732.10       | 229159.82      | 688144.65       | 2310370.46      |      |          |           |           |            |

Table S367: Critical values for detector  $\hat{H}_{mov,sn}^{m,0.1}$  with windows size  $n = 0.1$ , and IM-OLS estimation in a model with intercept. The number of integrated regressors is 2 and the highest power of  $x_{kt}$  is 3.



| m    | 90 %          | 95 %          | 97,5 %         | 99 %           | m    | 90 %    | 95 %     | 97,5 %   | 99 %      |
|------|---------------|---------------|----------------|----------------|------|---------|----------|----------|-----------|
| 0.10 | 1900142961.80 | 6897070689.33 | 19934263663.37 | 67514911301.17 | 0.51 | 6469.81 | 22382.73 | 64515.35 | 191108.59 |
| 0.11 | 1006959509.45 | 3596093584.30 | 10452133430.86 | 34741816298.82 | 0.52 | 5285.25 | 18543.92 | 50904.38 | 154992.87 |
| 0.12 | 577677490.94  | 2092418913.44 | 5912872955.11  | 20087593181.58 | 0.53 | 4201.64 | 14624.56 | 40435.40 | 127379.05 |
| 0.13 | 339477919.53  | 1227135120.78 | 3528359131.69  | 11638194979.64 | 0.54 | 3428.91 | 11952.24 | 32733.66 | 101213.48 |
| 0.14 | 203743922.48  | 744829438.13  | 2249610011.59  | 7279400999.23  | 0.55 | 2761.38 | 9642.39  | 25954.43 | 82667.74  |
| 0.15 | 127964886.61  | 474997090.48  | 1422033644.31  | 4526542545.08  | 0.56 | 2255.47 | 7971.93  | 21758.38 | 66392.34  |
| 0.16 | 80148966.42   | 298147872.95  | 876686101.17   | 3019883035.69  | 0.57 | 1822.42 | 6297.64  | 17252.80 | 51330.42  |
| 0.17 | 52475515.85   | 192972113.35  | 565842308.39   | 1943865726.10  | 0.58 | 1466.39 | 5101.04  | 14014.37 | 42186.65  |
| 0.18 | 34812316.54   | 128642467.68  | 381371345.00   | 1291520738.41  | 0.59 | 1193.89 | 4123.34  | 11252.50 | 33910.07  |
| 0.19 | 23642222.75   | 88534236.74   | 256201683.24   | 871278496.70   | 0.60 | 963.33  | 3305.05  | 9376.58  | 28176.39  |
| 0.20 | 16547079.75   | 61157546.50   | 179101165.76   | 581072975.39   | 0.61 | 799.29  | 2694.04  | 7556.46  | 22579.41  |
| 0.21 | 11827351.32   | 41895779.81   | 122674440.16   | 429586046.81   | 0.62 | 652.34  | 2165.21  | 6061.48  | 18440.16  |
| 0.22 | 8333004.59    | 30470451.28   | 86624621.38    | 303702685.99   | 0.63 | 527.28  | 1794.71  | 4968.56  | 14449.00  |
| 0.23 | 6114654.34    | 22242403.28   | 63947705.80    | 207662080.14   | 0.64 | 428.52  | 1410.04  | 3901.64  | 11683.31  |
| 0.24 | 4308025.57    | 16254322.80   | 45573171.95    | 149029869.26   | 0.65 | 348.38  | 1138.69  | 3084.67  | 9102.08   |
| 0.25 | 3211726.15    | 11850383.62   | 34095655.58    | 109940779.25   | 0.66 | 279.38  | 907.00   | 2421.46  | 7201.18   |
| 0.26 | 2344603.22    | 8637099.06    | 25514654.80    | 81981146.69    | 0.67 | 225.14  | 719.50   | 1928.12  | 5884.19   |
| 0.27 | 1807813.11    | 6510949.41    | 19030220.83    | 60786335.94    | 0.68 | 183.43  | 584.25   | 1525.14  | 4799.15   |
| 0.28 | 1365403.57    | 5002769.52    | 14175382.05    | 46150358.56    | 0.69 | 149.64  | 468.12   | 1212.15  | 3682.74   |
| 0.29 | 1008908.87    | 3735124.47    | 10740675.47    | 34436330.52    | 0.70 | 120.43  | 372.49   | 957.19   | 2787.99   |
| 0.30 | 766628.50     | 2775657.80    | 7973306.67     | 26014233.92    | 0.71 | 95.97   | 303.31   | 784.44   | 2222.52   |
| 0.31 | 602904.19     | 2163196.59    | 6310283.55     | 20484270.11    | 0.72 | 79.73   | 244.26   | 626.36   | 1784.67   |
| 0.32 | 458135.78     | 1635286.43    | 4784392.40     | 16211364.59    | 0.73 | 62.78   | 189.64   | 485.77   | 1361.93   |
| 0.33 | 360177.67     | 1283409.60    | 3828611.93     | 12604022.31    | 0.74 | 50.82   | 148.04   | 374.72   | 1025.29   |
| 0.34 | 282235.10     | 991189.88     | 2948836.95     | 9952127.23     | 0.75 | 40.63   | 115.09   | 288.73   | 793.89    |
| 0.35 | 220010.97     | 777734.66     | 2310659.59     | 7769661.68     | 0.76 | 32.39   | 90.28    | 227.49   | 606.85    |
| 0.36 | 172071.46     | 618889.21     | 1750417.18     | 5608083.75     | 0.77 | 25.44   | 72.89    | 175.78   | 486.41    |
| 0.37 | 136313.25     | 485467.57     | 1369211.47     | 4418230.59     | 0.78 | 20.06   | 56.21    | 134.65   | 380.11    |
| 0.38 | 109477.72     | 394992.13     | 1089121.40     | 3545186.45     | 0.79 | 15.68   | 42.93    | 102.75   | 272.56    |
| 0.39 | 86807.85      | 305622.87     | 857972.70      | 2756584.55     | 0.80 | 12.34   | 32.58    | 77.37    | 196.83    |
| 0.40 | 68511.07      | 247727.33     | 680818.18      | 2272035.11     | 0.81 | 9.65    | 24.59    | 56.59    | 149.38    |
| 0.41 | 54922.31      | 197360.31     | 562135.18      | 1781662.71     | 0.82 | 7.55    | 18.92    | 43.18    | 114.41    |
| 0.42 | 43732.43      | 156467.27     | 441590.99      | 1451869.08     | 0.83 | 5.93    | 14.22    | 31.51    | 80.42     |
| 0.43 | 35449.88      | 125470.07     | 349766.43      | 1116411.87     | 0.84 | 4.58    | 10.53    | 23.35    | 57.21     |
| 0.44 | 27861.37      | 99084.00      | 279330.14      | 869036.49      | 0.85 | 3.55    | 7.79     | 16.80    | 40.76     |
| 0.45 | 22379.43      | 79840.51      | 226530.18      | 710185.48      | 0.86 | 2.70    | 5.76     | 12.05    | 28.70     |
| 0.46 | 18297.37      | 63496.25      | 181192.97      | 569106.83      | 0.87 | 2.08    | 4.24     | 8.51     | 20.30     |
| 0.47 | 14788.40      | 52207.55      | 148850.60      | 462390.96      | 0.88 | 1.58    | 3.09     | 5.94     | 13.68     |
| 0.48 | 12047.89      | 41882.17      | 119607.76      | 377638.58      | 0.89 | 1.19    | 2.19     | 4.10     | 9.30      |
| 0.49 | 9646.74       | 33004.02      | 95623.59       | 305821.74      | 0.90 | 0.92    | 1.60     | 2.83     | 5.86      |
| 0.50 | 7819.87       | 27118.18      | 77110.47       | 246006.17      |      |         |          |          |           |

Table S368: Critical values for detector  $\hat{H}_{mov,sn}^{m,0.2}$  with windows size  $n = 0.2$ , and FM-OLS and D-OLS estimation in a model with intercept. The number of integrated regressors is 2 and the highest power of  $x_{kt}$  is 3.

| m    | 90 %           | 95 %           | 97.5 %          | 99 %            | m    | 90 %     | 95 %      | 97.5 %    | 99 %       |
|------|----------------|----------------|-----------------|-----------------|------|----------|-----------|-----------|------------|
| 0.10 | 20305592666.05 | 78745452481.40 | 237825350850.43 | 882985080998.12 | 0.51 | 63438.14 | 254006.55 | 747727.10 | 2472020.99 |
| 0.11 | 10970445089.56 | 41980394723.03 | 128893565750.74 | 464074045188.13 | 0.52 | 51315.45 | 201453.22 | 598855.72 | 1968536.80 |
| 0.12 | 6241805563.26  | 23480398192.08 | 72078180168.83  | 249594260675.40 | 0.53 | 41992.84 | 162973.10 | 473760.30 | 1620190.29 |
| 0.13 | 3525618194.82  | 13489274228.10 | 40984590431.47  | 144066313577.18 | 0.54 | 33801.73 | 129992.44 | 387401.30 | 1303038.09 |
| 0.14 | 2119028357.03  | 8081676561.82  | 24744673519.82  | 90587555154.96  | 0.55 | 27891.17 | 106334.57 | 309051.20 | 1047164.11 |
| 0.15 | 1309634375.53  | 5048814881.08  | 15788456842.40  | 56290525695.08  | 0.56 | 22503.42 | 85226.83  | 253647.76 | 858308.75  |
| 0.16 | 847894843.19   | 3199710569.18  | 9779497697.14   | 35901478299.24  | 0.57 | 18382.81 | 69432.50  | 205445.94 | 680857.63  |
| 0.17 | 552688858.00   | 2121261742.91  | 6510553739.19   | 23658423520.46  | 0.58 | 14850.94 | 56387.74  | 164654.88 | 564093.42  |
| 0.18 | 370029647.27   | 1421623345.73  | 4444595726.23   | 15612107113.94  | 0.59 | 12101.32 | 45273.50  | 134659.66 | 463222.66  |
| 0.19 | 254957690.24   | 986142110.12   | 3024626134.72   | 10954322401.55  | 0.60 | 9739.99  | 35966.66  | 108238.17 | 365383.32  |
| 0.20 | 177203304.38   | 692284000.75   | 2100885187.73   | 7534491225.66   | 0.61 | 7813.20  | 29264.58  | 86777.15  | 286407.69  |
| 0.21 | 121880952.90   | 479445293.94   | 1446489554.80   | 5364384302.96   | 0.62 | 6289.24  | 23618.28  | 70056.77  | 221607.71  |
| 0.22 | 86388339.96    | 341796093.05   | 1062015364.92   | 3670324669.31   | 0.63 | 5110.55  | 19081.41  | 55948.10  | 176937.51  |
| 0.23 | 61886761.31    | 240751773.94   | 739556392.66    | 2622987311.22   | 0.64 | 4139.99  | 15304.70  | 44378.41  | 143902.00  |
| 0.24 | 45814704.28    | 173922330.73   | 535743552.84    | 1905731700.01   | 0.65 | 3378.09  | 12099.03  | 35086.68  | 111627.71  |
| 0.25 | 34119193.02    | 131186727.64   | 412188837.88    | 1382096367.81   | 0.66 | 2724.42  | 9552.05   | 27688.02  | 88723.24   |
| 0.26 | 25089867.29    | 97948053.44    | 303981592.64    | 1068634852.80   | 0.67 | 2176.80  | 7648.94   | 21862.81  | 70609.85   |
| 0.27 | 18386456.99    | 72582573.38    | 226795836.14    | 814786431.12    | 0.68 | 1739.12  | 6170.15   | 17277.36  | 55789.85   |
| 0.28 | 13861655.24    | 54704737.96    | 168332351.16    | 615393090.04    | 0.69 | 1378.96  | 4792.88   | 13819.52  | 44348.22   |
| 0.29 | 10384130.46    | 41660598.61    | 126758535.72    | 456518490.80    | 0.70 | 1110.22  | 3868.57   | 10765.37  | 33534.76   |
| 0.30 | 8042551.18     | 31507128.85    | 94927579.74     | 341790383.24    | 0.71 | 880.34   | 3060.30   | 8401.58   | 26844.03   |
| 0.31 | 6172639.37     | 23759618.63    | 71724032.18     | 268314425.42    | 0.72 | 714.64   | 2451.71   | 6749.87   | 20756.78   |
| 0.32 | 4835381.94     | 18481598.78    | 55916515.37     | 208693220.10    | 0.73 | 563.51   | 1931.72   | 5227.44   | 16241.96   |
| 0.33 | 3687047.99     | 14466967.08    | 44727359.17     | 157758396.26    | 0.74 | 443.74   | 1510.09   | 4075.59   | 12693.47   |
| 0.34 | 2917900.45     | 11276870.64    | 35423293.60     | 121554226.32    | 0.75 | 353.83   | 1158.96   | 3168.39   | 9605.65    |
| 0.35 | 2293297.79     | 8854503.18     | 27329224.10     | 94135032.96     | 0.76 | 275.59   | 904.28    | 2472.98   | 7104.13    |
| 0.36 | 1769689.22     | 7069713.58     | 21059171.62     | 70092517.96     | 0.77 | 213.10   | 697.66    | 1859.56   | 5439.81    |
| 0.37 | 1387053.92     | 5488998.79     | 16159869.94     | 54566063.92     | 0.78 | 168.15   | 529.58    | 1396.12   | 4180.22    |
| 0.38 | 1100416.14     | 4293904.32     | 12776179.13     | 43352424.83     | 0.79 | 129.54   | 410.53    | 1068.81   | 3283.05    |
| 0.39 | 875190.11      | 3352293.51     | 10157557.80     | 34038683.88     | 0.80 | 98.71    | 308.74    | 819.33    | 2316.69    |
| 0.40 | 696107.22      | 2682448.20     | 8181531.04      | 26570840.88     | 0.81 | 76.05    | 232.95    | 611.43    | 1779.33    |
| 0.41 | 547054.58      | 2148712.31     | 6426019.55      | 21230442.31     | 0.82 | 57.97    | 174.37    | 452.38    | 1280.33    |
| 0.42 | 436265.06      | 1716915.12     | 5174551.72      | 17121669.55     | 0.83 | 44.47    | 126.54    | 323.89    | 908.33     |
| 0.43 | 355846.95      | 1374178.23     | 4182511.21      | 14155683.40     | 0.84 | 33.62    | 92.80     | 231.63    | 660.79     |
| 0.44 | 286479.53      | 1108897.69     | 3355027.15      | 11252404.40     | 0.85 | 25.29    | 67.95     | 167.78    | 456.76     |
| 0.45 | 228784.53      | 883784.83      | 2673314.97      | 9199848.22      | 0.86 | 19.05    | 49.21     | 120.17    | 321.92     |
| 0.46 | 184803.00      | 714774.35      | 2130570.73      | 7383024.22      | 0.87 | 14.04    | 36.10     | 83.45     | 226.40     |
| 0.47 | 147959.37      | 578546.26      | 1704365.75      | 5988375.19      | 0.88 | 10.37    | 25.44     | 58.25     | 149.79     |
| 0.48 | 120387.44      | 457796.90      | 1396858.54      | 4806256.98      | 0.89 | 7.63     | 17.75     | 39.32     | 100.57     |
| 0.49 | 97177.90       | 368259.79      | 1158476.95      | 3768319.58      | 0.90 | 5.66     | 12.39     | 26.70     | 65.56      |
| 0.50 | 78322.06       | 309545.81      | 918937.65       | 3037868.78      |      |          |           |           |            |

Table S369: Critical values for detector  $\hat{H}_{mov,sn}^{m,0.2}$  with windows size  $n = 0.2$ , and IM-OLS estimation in a model with intercept. The number of integrated regressors is 2 and the highest power of  $x_{kt}$  is 3.

| m    | 90 %          | 95 %          | 97,5 %         | 99 %           | m    | 90 %    | 95 %     | 97,5 %   | 99 %      |
|------|---------------|---------------|----------------|----------------|------|---------|----------|----------|-----------|
| 0.10 | 2163268552.85 | 7916207306.81 | 22953654027.82 | 78160769181.35 | 0.51 | 6962.09 | 23892.10 | 68172.13 | 200952.40 |
| 0.11 | 1155015629.47 | 4106533979.81 | 12010915412.02 | 40506237197.88 | 0.52 | 5651.71 | 19705.71 | 54058.86 | 162503.30 |
| 0.12 | 661315879.11  | 2402856899.93 | 6849939195.79  | 22826704407.50 | 0.53 | 4509.24 | 15654.56 | 42704.60 | 133231.75 |
| 0.13 | 390818249.83  | 1410652052.17 | 4085169787.82  | 13319577429.52 | 0.54 | 3659.14 | 12699.53 | 34518.59 | 106340.23 |
| 0.14 | 233039353.72  | 849907013.03  | 2590675519.49  | 8273018820.72  | 0.55 | 2948.72 | 10201.13 | 27234.10 | 86609.55  |
| 0.15 | 146691214.23  | 545019946.20  | 1615218784.33  | 5237420262.95  | 0.56 | 2399.49 | 8375.17  | 22767.61 | 69493.41  |
| 0.16 | 90644311.64   | 339306281.88  | 1007694516.99  | 3502688880.07  | 0.57 | 1934.52 | 6612.73  | 18023.37 | 53162.22  |
| 0.17 | 59775035.76   | 220204253.25  | 641348931.42   | 2230554156.64  | 0.58 | 1541.02 | 5306.00  | 14529.14 | 43700.66  |
| 0.18 | 39552083.89   | 145966170.85  | 436666962.45   | 1467581228.15  | 0.59 | 1252.93 | 4284.47  | 11713.36 | 34746.69  |
| 0.19 | 27020425.80   | 100887606.70  | 295413036.56   | 996084263.25   | 0.60 | 1007.04 | 3448.90  | 9718.37  | 28925.97  |
| 0.20 | 18652710.44   | 69347545.05   | 203913719.85   | 665543640.49   | 0.61 | 832.24  | 2809.74  | 7784.93  | 23064.39  |
| 0.21 | 13409233.37   | 47882967.18   | 139226137.17   | 489165488.13   | 0.62 | 676.55  | 2235.14  | 6248.36  | 18963.69  |
| 0.22 | 9423823.36    | 34460606.37   | 97912955.56    | 344213454.43   | 0.63 | 546.72  | 1845.25  | 5071.22  | 14768.67  |
| 0.23 | 6918411.56    | 25259173.02   | 72438753.24    | 235063887.71   | 0.64 | 442.43  | 1451.51  | 3983.23  | 11887.19  |
| 0.24 | 4872693.46    | 18583722.78   | 51750182.99    | 169385231.81   | 0.65 | 359.36  | 1165.29  | 3163.04  | 9183.77   |
| 0.25 | 3621432.63    | 13323128.75   | 38106491.18    | 124899857.07   | 0.66 | 289.09  | 924.04   | 2469.88  | 7288.26   |
| 0.26 | 2635958.77    | 9770659.87    | 28583245.69    | 94205394.84    | 0.67 | 231.16  | 731.21   | 1955.96  | 5923.00   |
| 0.27 | 2038591.70    | 7396573.18    | 21506093.41    | 67888621.15    | 0.68 | 187.45  | 592.48   | 1544.78  | 4847.17   |
| 0.28 | 1542860.33    | 5661272.91    | 15981551.68    | 51777729.95    | 0.69 | 152.25  | 474.57   | 1223.72  | 3705.37   |
| 0.29 | 1138889.85    | 4194013.16    | 12039320.33    | 38237015.69    | 0.70 | 122.32  | 376.04   | 967.70   | 2798.38   |
| 0.30 | 856690.14     | 3137928.07    | 8959805.93     | 29144461.06    | 0.71 | 97.24   | 306.16   | 786.49   | 2224.67   |
| 0.31 | 671876.19     | 2415796.11    | 7021434.89     | 22840735.53    | 0.72 | 80.59   | 245.47   | 628.30   | 1793.01   |
| 0.32 | 512379.83     | 1818011.07    | 5301181.30     | 18070603.66    | 0.73 | 63.35   | 190.53   | 487.43   | 1367.75   |
| 0.33 | 403154.62     | 1437297.33    | 4240907.57     | 13977566.48    | 0.74 | 51.13   | 148.51   | 375.33   | 1027.93   |
| 0.34 | 314279.33     | 1103540.03    | 3298483.35     | 10933812.07    | 0.75 | 40.81   | 115.30   | 289.47   | 794.76    |
| 0.35 | 245233.30     | 860964.91     | 2535815.57     | 8461305.76     | 0.76 | 32.54   | 90.37    | 227.61   | 607.51    |
| 0.36 | 192319.21     | 685128.73     | 1928296.96     | 6259728.50     | 0.77 | 25.52   | 72.97    | 175.83   | 486.47    |
| 0.37 | 150439.62     | 533348.99     | 1493978.40     | 4866011.17     | 0.78 | 20.15   | 56.26    | 134.79   | 380.20    |
| 0.38 | 121128.40     | 435115.38     | 1202668.90     | 3874889.18     | 0.79 | 15.76   | 43.03    | 102.82   | 272.64    |
| 0.39 | 95531.91      | 338728.03     | 943379.08      | 3041280.85     | 0.80 | 12.41   | 32.63    | 77.46    | 196.93    |
| 0.40 | 75620.68      | 270945.89     | 750841.02      | 2453165.93     | 0.81 | 9.75    | 24.68    | 56.66    | 149.41    |
| 0.41 | 60287.53      | 217073.15     | 610077.93      | 1941770.71     | 0.82 | 7.64    | 19.01    | 43.25    | 114.56    |
| 0.42 | 47858.59      | 171839.98     | 475863.37      | 1570757.42     | 0.83 | 6.03    | 14.31    | 31.63    | 80.62     |
| 0.43 | 39064.53      | 136735.77     | 376801.59      | 1196458.77     | 0.84 | 4.69    | 10.63    | 23.41    | 57.36     |
| 0.44 | 30453.76      | 107078.85     | 303759.32      | 935508.57      | 0.85 | 3.66    | 7.91     | 16.90    | 40.90     |
| 0.45 | 24424.04      | 86865.82      | 244454.70      | 767953.44      | 0.86 | 2.81    | 5.86     | 12.18    | 28.76     |
| 0.46 | 19933.78      | 69119.20      | 194571.30      | 612951.24      | 0.87 | 2.20    | 4.35     | 8.62     | 20.45     |
| 0.47 | 16060.15      | 56535.46      | 158803.11      | 497161.85      | 0.88 | 1.70    | 3.21     | 6.05     | 13.76     |
| 0.48 | 13023.72      | 44981.00      | 127348.34      | 405260.23      | 0.89 | 1.32    | 2.31     | 4.21     | 9.41      |
| 0.49 | 10363.70      | 35577.65      | 102148.29      | 323881.66      | 0.90 | 1.08    | 1.71     | 2.94     | 6.00      |
| 0.50 | 8428.52       | 28849.97      | 82434.73       | 257562.88      |      |         |          |          |           |

Table S370: Critical values for detector  $\hat{H}_{mov,sn}^{m,0.3}$  with windows size  $n = 0.3$ , and FM-OLS and D-OLS estimation in a model with intercept. The number of integrated regressors is 2 and the highest power of  $x_{kt}$  is 3.

| m    | 90 %           | 95 %           | 97,5 %          | 99 %             | m    | 90 %     | 95 %      | 97,5 %    | 99 %       |
|------|----------------|----------------|-----------------|------------------|------|----------|-----------|-----------|------------|
| 0.10 | 23439276005.42 | 90865915825.82 | 278193628799.56 | 1023715783827.49 | 0.51 | 68608.62 | 271051.89 | 785562.95 | 2621889.98 |
| 0.11 | 12569570278.96 | 48674231026.18 | 150406939622.28 | 538173655501.43  | 0.52 | 54968.44 | 214313.45 | 631664.90 | 2076084.08 |
| 0.12 | 7094600559.48  | 26930081203.20 | 83023901662.48  | 292100941091.14  | 0.53 | 44898.43 | 172072.15 | 501917.66 | 1693996.99 |
| 0.13 | 4009244664.99  | 15457477786.47 | 47500133006.65  | 165386393476.45  | 0.54 | 36134.84 | 137676.62 | 403441.60 | 1367252.21 |
| 0.14 | 2421596029.48  | 9303488769.71  | 28566140860.22  | 105063375316.13  | 0.55 | 29527.48 | 112359.27 | 324386.41 | 1088401.67 |
| 0.15 | 1488639243.74  | 5770329403.02  | 18072185012.44  | 64482566659.38   | 0.56 | 23930.03 | 89666.01  | 267253.11 | 896154.23  |
| 0.16 | 964732193.07   | 3674491732.85  | 11214436990.49  | 40836971012.88   | 0.57 | 19417.18 | 72672.81  | 215079.82 | 709508.57  |
| 0.17 | 629517024.32   | 2410239670.59  | 7467236154.81   | 27168951808.05   | 0.58 | 15708.61 | 58948.61  | 172617.81 | 591195.61  |
| 0.18 | 423178141.20   | 1624963380.66  | 5099007020.20   | 18118905058.24   | 0.59 | 12688.22 | 47438.03  | 140326.48 | 479802.71  |
| 0.19 | 291689801.17   | 1132580155.15  | 3446923806.55   | 12363489364.90   | 0.60 | 10259.70 | 37430.39  | 111787.03 | 373371.19  |
| 0.20 | 201213254.48   | 786965448.51   | 2383147270.12   | 8620078870.60    | 0.61 | 8158.40  | 30180.95  | 90170.33  | 293233.05  |
| 0.21 | 137605015.11   | 540202665.39   | 1642677915.17   | 6128105982.69    | 0.62 | 6580.58  | 24177.89  | 72085.97  | 226142.48  |
| 0.22 | 97459303.07    | 387180485.03   | 1204054496.28   | 4184031548.23    | 0.63 | 5312.45  | 19748.82  | 57460.50  | 180099.92  |
| 0.23 | 69926512.15    | 271073777.08   | 836075728.80    | 2930326243.99    | 0.64 | 4282.91  | 15702.61  | 45494.59  | 145970.88  |
| 0.24 | 51976108.67    | 196985419.83   | 610291296.56    | 2168324664.14    | 0.65 | 3477.83  | 12397.69  | 35697.46  | 113381.68  |
| 0.25 | 38563141.87    | 148845287.65   | 467505051.09    | 1547770080.20    | 0.66 | 2797.35  | 9749.20   | 28154.10  | 90478.94   |
| 0.26 | 28217048.90    | 110060442.47   | 342533326.10    | 1199091477.72    | 0.67 | 2238.04  | 7807.56   | 22025.31  | 71022.50   |
| 0.27 | 20662247.43    | 81286897.33    | 255405401.37    | 903679248.72     | 0.68 | 1774.93  | 6245.30   | 17439.96  | 56607.24   |
| 0.28 | 15634444.27    | 61864425.55    | 190115078.78    | 679553175.50     | 0.69 | 1403.57  | 4866.18   | 13960.44  | 44459.27   |
| 0.29 | 11656001.88    | 46906482.95    | 142702548.61    | 513164219.31     | 0.70 | 1126.26  | 3905.42   | 10866.48  | 33673.13   |
| 0.30 | 9004979.27     | 35212237.39    | 106420224.38    | 380223672.03     | 0.71 | 890.63   | 3074.16   | 8417.49   | 26978.09   |
| 0.31 | 6917324.10     | 26472288.06    | 80497924.10     | 295137762.82     | 0.72 | 721.99   | 2465.91   | 6777.46   | 20806.30   |
| 0.32 | 5377183.70     | 20501995.53    | 62277092.94     | 231297188.95     | 0.73 | 567.92   | 1943.32   | 5238.04   | 16259.40   |
| 0.33 | 4104113.59     | 16119674.81    | 49478232.75     | 174947886.30     | 0.74 | 445.74   | 1514.48   | 4085.33   | 12697.04   |
| 0.34 | 3240246.98     | 12473836.62    | 39103021.67     | 135361569.77     | 0.75 | 356.06   | 1160.19   | 3172.75   | 9611.29    |
| 0.35 | 2547885.65     | 9766403.17     | 30156703.59     | 103300414.30     | 0.76 | 276.25   | 905.99    | 2474.13   | 7108.75    |
| 0.36 | 1971078.55     | 7816583.62     | 23481505.84     | 78042632.78      | 0.77 | 213.54   | 698.62    | 1859.75   | 5439.91    |
| 0.37 | 1536920.63     | 6079414.86     | 17835860.38     | 59667083.33      | 0.78 | 168.41   | 530.05    | 1396.40   | 4180.53    |
| 0.38 | 1216470.36     | 4687265.09     | 14013882.36     | 47166550.95      | 0.79 | 129.69   | 410.80    | 1068.95   | 3283.31    |
| 0.39 | 956341.47      | 3687429.70     | 11208839.53     | 37141185.56      | 0.80 | 98.82    | 308.86    | 819.46    | 2316.77    |
| 0.40 | 765017.63      | 2972628.55     | 8910035.03      | 29309401.41      | 0.81 | 76.18    | 233.04    | 611.51    | 1779.45    |
| 0.41 | 606144.22      | 2351453.88     | 7031574.40      | 23214899.50      | 0.82 | 58.07    | 174.46    | 452.53    | 1280.42    |
| 0.42 | 479185.26      | 1888745.86     | 5618881.59      | 18518440.05      | 0.83 | 44.60    | 126.66    | 324.00    | 908.42     |
| 0.43 | 388433.59      | 1501675.21     | 4493182.07      | 15186386.70      | 0.84 | 33.76    | 92.90     | 231.71    | 660.86     |
| 0.44 | 313204.58      | 1204126.62     | 3613234.45      | 11977108.89      | 0.85 | 25.40    | 68.05     | 167.89    | 456.90     |
| 0.45 | 250268.29      | 964087.83      | 2895756.66      | 9798324.79       | 0.86 | 19.17    | 49.31     | 120.23    | 322.03     |
| 0.46 | 201586.39      | 774533.98      | 2265351.78      | 7833639.38       | 0.87 | 14.16    | 36.25     | 83.57     | 226.55     |
| 0.47 | 160534.81      | 622494.44      | 1816521.05      | 6394845.18       | 0.88 | 10.48    | 25.56     | 58.38     | 149.89     |
| 0.48 | 130563.04      | 496365.12      | 1494130.37      | 5108330.92       | 0.89 | 7.74     | 17.85     | 39.46     | 100.65     |
| 0.49 | 104565.31      | 397817.33      | 1237623.57      | 4007839.18       | 0.90 | 5.77     | 12.49     | 26.83     | 65.61      |
| 0.50 | 84973.19       | 331286.52      | 979811.70       | 3201400.20       |      |          |           |           |            |

Table S371: Critical values for detector  $\hat{H}_{mov,sn}^{m,0.3}$  with windows size  $n = 0.3$ , and IM-OLS estimation in a model with intercept. The number of integrated regressors is 2 and the highest power of  $x_{kt}$  is 3.

| m    | 90 %          | 95 %           | 97,5 %         | 99 %            | m    | 90 %    | 95 %     | 97,5 %   | 99 %      |
|------|---------------|----------------|----------------|-----------------|------|---------|----------|----------|-----------|
| 0.10 | 3646296666.46 | 12209318977.70 | 32887555044.41 | 103077146008.23 | 0.51 | 8841.42 | 30265.15 | 85308.67 | 251254.43 |
| 0.11 | 1896240587.73 | 6108516634.58  | 16800549107.92 | 50863907023.24  | 0.52 | 7172.77 | 24635.32 | 67136.25 | 204381.39 |
| 0.12 | 1055443782.22 | 3456798933.30  | 9490403505.24  | 28690056975.77  | 0.53 | 5840.12 | 19423.84 | 54007.24 | 164865.04 |
| 0.13 | 595760573.43  | 1983046515.39  | 5553426152.31  | 16204256588.13  | 0.54 | 4700.52 | 15997.98 | 43700.57 | 134178.26 |
| 0.14 | 358070883.01  | 1201617864.35  | 3300774866.68  | 10089946256.88  | 0.55 | 3827.75 | 13015.48 | 34500.19 | 105841.30 |
| 0.15 | 221980821.68  | 758200048.68   | 2089356619.40  | 6231258471.54   | 0.56 | 3180.84 | 10770.75 | 29254.21 | 88012.84  |
| 0.16 | 135066714.79  | 465806313.75   | 1293518005.44  | 4100989439.62   | 0.57 | 2586.54 | 8601.61  | 22902.00 | 69257.05  |
| 0.17 | 88351281.07   | 292949171.10   | 805697905.00   | 2590605910.69   | 0.58 | 2077.82 | 7015.92  | 19090.44 | 57356.02  |
| 0.18 | 57611731.65   | 197330706.42   | 548107104.97   | 1691989736.98   | 0.59 | 1696.24 | 5622.90  | 15503.54 | 46083.51  |
| 0.19 | 38987215.89   | 132630689.19   | 363993653.91   | 1163042677.98   | 0.60 | 1397.65 | 4582.96  | 12762.86 | 38397.57  |
| 0.20 | 26573450.62   | 91224282.72    | 245454791.38   | 799952996.84    | 0.61 | 1157.43 | 3727.24  | 10397.16 | 31333.50  |
| 0.21 | 18514177.58   | 62495604.14    | 169978348.40   | 553448236.72    | 0.62 | 948.76  | 2984.64  | 8359.34  | 25541.38  |
| 0.22 | 12728722.32   | 44331853.72    | 124760347.05   | 377414152.16    | 0.63 | 779.28  | 2491.36  | 6878.57  | 20413.95  |
| 0.23 | 9375086.00    | 31706288.39    | 87075464.98    | 273290758.83    | 0.64 | 626.84  | 1973.72  | 5402.34  | 16648.04  |
| 0.24 | 6693406.65    | 22865612.95    | 62959706.49    | 202826071.29    | 0.65 | 513.17  | 1608.39  | 4340.75  | 13066.41  |
| 0.25 | 4851912.27    | 16607606.48    | 46535590.26    | 148144209.96    | 0.66 | 414.28  | 1293.82  | 3486.88  | 10112.45  |
| 0.26 | 3534551.49    | 12147863.52    | 34698143.12    | 110899235.11    | 0.67 | 339.32  | 1032.96  | 2725.30  | 8511.23   |
| 0.27 | 2680726.30    | 9161665.19     | 25631475.11    | 80625197.99     | 0.68 | 278.35  | 830.00   | 2149.91  | 6819.65   |
| 0.28 | 2008923.17    | 6782960.25     | 18776202.72    | 58890954.06     | 0.69 | 231.91  | 666.73   | 1713.07  | 5310.14   |
| 0.29 | 1466526.41    | 5095391.02     | 14202759.19    | 44582185.23     | 0.70 | 184.38  | 533.20   | 1397.11  | 4036.61   |
| 0.30 | 1130109.34    | 3825935.61     | 10725157.45    | 33637221.51     | 0.71 | 150.35  | 431.98   | 1139.49  | 3351.19   |
| 0.31 | 857616.88     | 2938308.41     | 8270854.26     | 26448924.89     | 0.72 | 126.43  | 351.81   | 902.86   | 2563.70   |
| 0.32 | 655605.27     | 2226796.17     | 6277017.28     | 20246773.11     | 0.73 | 101.63  | 281.81   | 704.04   | 1982.21   |
| 0.33 | 510314.16     | 1746639.74     | 4855303.88     | 16143195.65     | 0.74 | 82.42   | 221.59   | 552.59   | 1577.15   |
| 0.34 | 396681.02     | 1345406.80     | 3799646.72     | 12557053.71     | 0.75 | 66.63   | 177.51   | 431.19   | 1215.48   |
| 0.35 | 310987.91     | 1053241.41     | 2962523.58     | 9517782.88      | 0.76 | 53.62   | 141.10   | 344.37   | 961.61    |
| 0.36 | 240727.56     | 832115.62      | 2281465.26     | 7406183.84      | 0.77 | 42.99   | 112.02   | 268.36   | 739.43    |
| 0.37 | 188798.44     | 641587.78      | 1761093.21     | 5544318.69      | 0.78 | 34.21   | 87.06    | 210.00   | 566.90    |
| 0.38 | 148614.12     | 510051.59      | 1420992.94     | 4534478.38      | 0.79 | 27.33   | 67.59    | 157.75   | 421.41    |
| 0.39 | 118628.13     | 404617.22      | 1121081.43     | 3519064.37      | 0.80 | 21.47   | 51.25    | 120.90   | 300.11    |
| 0.40 | 93999.52      | 320813.49      | 890182.42      | 2893103.81      | 0.81 | 17.15   | 39.45    | 91.57    | 233.62    |
| 0.41 | 76710.87      | 259617.60      | 723729.70      | 2235000.05      | 0.82 | 13.52   | 30.80    | 69.16    | 174.43    |
| 0.42 | 60440.64      | 204330.92      | 569403.23      | 1790647.04      | 0.83 | 10.70   | 23.51    | 50.54    | 124.37    |
| 0.43 | 48549.98      | 165407.18      | 453711.41      | 1405297.24      | 0.84 | 8.26    | 17.50    | 37.42    | 91.60     |
| 0.44 | 38498.26      | 132524.88      | 361567.39      | 1103057.96      | 0.85 | 6.42    | 13.05    | 26.94    | 65.00     |
| 0.45 | 31321.54      | 105904.93      | 298844.28      | 897658.88       | 0.86 | 4.90    | 9.67     | 19.30    | 45.86     |
| 0.46 | 25433.45      | 84232.83       | 242228.05      | 739784.94       | 0.87 | 3.75    | 7.14     | 13.82    | 31.64     |
| 0.47 | 20492.57      | 69293.46       | 194000.16      | 596301.22       | 0.88 | 2.79    | 5.13     | 9.64     | 21.49     |
| 0.48 | 16615.73      | 56524.74       | 158616.25      | 476824.07       | 0.89 | 2.03    | 3.67     | 6.63     | 14.46     |
| 0.49 | 13365.77      | 44362.32       | 125006.16      | 392824.82       | 0.90 | 1.48    | 2.59     | 4.45     | 9.20      |
| 0.50 | 10780.19      | 36991.43       | 101635.96      | 305799.73       |      |         |          |          |           |

Table S372: Critical values for detector  $\hat{H}_{mov,sn}^{m,0.1}$  with windows size  $n = 0.1$ , and FM-OLS and D-OLS estimation in a model with intercept and linear trend. The number of integrated regressors is 2 and the highest power of  $x_{kt}$  is 3.

| m    | 90 %           | 95 %           | 97.5 %          | 99 %            | m    | 90 %     | 95 %      | 97.5 %    | 99 %       |
|------|----------------|----------------|-----------------|-----------------|------|----------|-----------|-----------|------------|
| 0.10 | 25663890519.76 | 89094144188.80 | 260699080041.71 | 867513291187.29 | 0.51 | 55795.82 | 213259.39 | 633693.19 | 2022997.62 |
| 0.11 | 13396012164.93 | 47502666103.59 | 136697500752.92 | 440804543613.63 | 0.52 | 45002.57 | 171139.89 | 501738.05 | 1625430.59 |
| 0.12 | 7264939990.38  | 26248145412.30 | 76055744297.84  | 238198159175.04 | 0.53 | 36544.80 | 136536.29 | 397998.90 | 1331584.34 |
| 0.13 | 4203625833.99  | 14744952415.06 | 43374246916.70  | 143105730924.62 | 0.54 | 29985.53 | 111895.88 | 322981.27 | 1089142.00 |
| 0.14 | 2423038442.69  | 8624694165.92  | 25494697401.32  | 91147794150.14  | 0.55 | 24558.99 | 90371.95  | 265808.36 | 901700.47  |
| 0.15 | 1469124087.23  | 5238101507.32  | 15559923480.91  | 51770498745.02  | 0.56 | 20028.45 | 73151.82  | 219344.15 | 722328.99  |
| 0.16 | 942214717.60   | 3284053793.76  | 9907066032.70   | 33676955432.51  | 0.57 | 16321.63 | 59705.55  | 176768.61 | 567525.67  |
| 0.17 | 602507805.58   | 2107847000.78  | 5956406988.87   | 21454857880.98  | 0.58 | 13232.73 | 47876.85  | 141191.17 | 476697.34  |
| 0.18 | 397964227.66   | 1419739571.13  | 3984722990.04   | 13921465926.23  | 0.59 | 10852.87 | 39081.44  | 116546.53 | 388346.58  |
| 0.19 | 262769859.89   | 944175664.86   | 2732592607.49   | 9777959877.19   | 0.60 | 8823.52  | 31734.23  | 94604.38  | 309418.19  |
| 0.20 | 179138916.75   | 658211877.54   | 1920057941.70   | 6503236551.27   | 0.61 | 7161.02  | 25783.18  | 75173.31  | 249737.52  |
| 0.21 | 124924575.38   | 451525497.23   | 1297059194.75   | 4465058961.26   | 0.62 | 5793.39  | 21023.80  | 59836.94  | 196448.95  |
| 0.22 | 87249644.18    | 323261901.28   | 932909991.03    | 3156204836.87   | 0.63 | 4700.03  | 17210.42  | 49105.68  | 159505.20  |
| 0.23 | 62216163.62    | 228141792.51   | 685474889.41    | 2240380756.50   | 0.64 | 3807.69  | 13981.17  | 40257.09  | 128529.43  |
| 0.24 | 45481664.84    | 168677896.74   | 492187141.66    | 1684025507.84   | 0.65 | 3100.86  | 10983.48  | 32108.19  | 102443.20  |
| 0.25 | 33057615.93    | 121428607.63   | 358297197.69    | 1224897969.20   | 0.66 | 2511.07  | 8770.27   | 25944.20  | 80417.86   |
| 0.26 | 24267184.17    | 89979616.84    | 262722717.22    | 918815494.92    | 0.67 | 2028.90  | 7012.63   | 20774.93  | 64415.31   |
| 0.27 | 17736578.10    | 66819067.60    | 197565910.77    | 673152890.58    | 0.68 | 1647.05  | 5619.55   | 16233.92  | 51866.84   |
| 0.28 | 13250455.61    | 49954281.61    | 149478932.59    | 508686621.75    | 0.69 | 1348.13  | 4424.29   | 13015.35  | 41923.92   |
| 0.29 | 9817168.88     | 36636434.89    | 110844039.01    | 386475168.83    | 0.70 | 1095.63  | 3567.48   | 10461.80  | 32249.83   |
| 0.30 | 7549202.34     | 27378991.71    | 81305242.17     | 279688050.86    | 0.71 | 876.38   | 2922.11   | 8091.93   | 26597.68   |
| 0.31 | 5750304.22     | 20790240.83    | 62092874.41     | 218554243.52    | 0.72 | 713.51   | 2359.48   | 6574.32   | 20338.93   |
| 0.32 | 4433597.20     | 16040743.18    | 47742648.92     | 167012151.78    | 0.73 | 575.94   | 1877.39   | 5067.84   | 15712.48   |
| 0.33 | 3418956.10     | 12407722.11    | 36773160.77     | 127801658.85    | 0.74 | 460.48   | 1487.12   | 3965.84   | 12265.39   |
| 0.34 | 2683902.62     | 9600714.29     | 29828382.53     | 101905459.65    | 0.75 | 364.93   | 1165.04   | 3109.97   | 9397.69    |
| 0.35 | 2099769.81     | 7535765.35     | 22796429.40     | 77980852.31     | 0.76 | 288.45   | 920.21    | 2401.71   | 7142.79    |
| 0.36 | 1622357.71     | 5910619.46     | 17257947.40     | 58935756.87     | 0.77 | 228.06   | 707.81    | 1854.53   | 5505.11    |
| 0.37 | 1276357.87     | 4707047.42     | 13490402.84     | 45773514.43     | 0.78 | 180.31   | 554.18    | 1432.98   | 4234.75    |
| 0.38 | 1006963.05     | 3719074.95     | 10815822.13     | 37404279.23     | 0.79 | 142.52   | 421.30    | 1106.73   | 3273.10    |
| 0.39 | 792771.17      | 2954283.75     | 8563738.48      | 29409307.08     | 0.80 | 110.62   | 325.06    | 841.46    | 2448.53    |
| 0.40 | 630288.40      | 2377070.54     | 6823812.03      | 23384495.48     | 0.81 | 86.80    | 248.26    | 640.65    | 1830.16    |
| 0.41 | 489175.72      | 1822460.82     | 5513159.67      | 18642299.13     | 0.82 | 67.43    | 187.31    | 489.39    | 1345.50    |
| 0.42 | 394285.65      | 1454791.07     | 4324494.76      | 14819111.52     | 0.83 | 52.32    | 141.78    | 352.60    | 970.60     |
| 0.43 | 310044.94      | 1144753.49     | 3448047.42      | 11929175.80     | 0.84 | 40.56    | 104.41    | 253.35    | 693.04     |
| 0.44 | 254944.48      | 927114.20      | 2770776.36      | 9226447.95      | 0.85 | 31.04    | 75.37     | 181.04    | 497.20     |
| 0.45 | 203096.58      | 744532.41      | 2202386.70      | 7425804.54      | 0.86 | 23.48    | 55.04     | 128.21    | 344.31     |
| 0.46 | 164602.29      | 609741.73      | 1782729.58      | 6064340.63      | 0.87 | 17.53    | 39.37     | 90.21     | 240.72     |
| 0.47 | 131493.49      | 485254.20      | 1416795.36      | 4908178.48      | 0.88 | 13.04    | 28.57     | 61.29     | 160.10     |
| 0.48 | 106143.72      | 392865.60      | 1188128.67      | 3845655.66      | 0.89 | 9.62     | 19.78     | 41.45     | 104.73     |
| 0.49 | 84965.47       | 317134.24      | 971589.42       | 3158009.77      | 0.90 | 7.04     | 13.91     | 28.40     | 68.58      |
| 0.50 | 69226.30       | 259618.90      | 771300.14       | 2539631.59      |      |          |           |           |            |

Table S373: Critical values for detector  $\hat{H}_{mov,sn}^{m,0.1}$  with windows size  $n = 0.1$ , and IM-OLS estimation in a model with intercept and linear trend. The number of integrated regressors is 2 and the highest power of  $x_{kt}$  is 3.

| m    | 90 %          | 95 %           | 97,5 %         | 99 %            | m    | 90 %     | 95 %     | 97,5 %    | 99 %      |
|------|---------------|----------------|----------------|-----------------|------|----------|----------|-----------|-----------|
| 0.10 | 4770066720.03 | 16399556288.52 | 44607673829.42 | 140847516722.49 | 0.51 | 11542.22 | 39398.44 | 112364.21 | 321429.34 |
| 0.11 | 2496130403.39 | 8106547613.51  | 23103645650.94 | 70988979721.04  | 0.52 | 9378.26  | 32181.53 | 88259.18  | 260753.99 |
| 0.12 | 1395136822.23 | 4705074149.51  | 13016775512.51 | 39539279116.47  | 0.53 | 7616.69  | 25120.64 | 69337.47  | 210641.04 |
| 0.13 | 790998586.48  | 2678169041.47  | 7551646722.52  | 22420290785.50  | 0.54 | 6106.61  | 20676.35 | 55872.95  | 171455.34 |
| 0.14 | 479582661.40  | 1628541780.11  | 4546785249.19  | 14081609037.05  | 0.55 | 4925.05  | 16799.85 | 44002.94  | 135213.64 |
| 0.15 | 293838079.29  | 1026204513.64  | 2886846944.48  | 8691636885.13   | 0.56 | 4091.35  | 13677.08 | 37466.44  | 109539.79 |
| 0.16 | 180691002.44  | 629729199.48   | 1779099669.35  | 5682550436.47   | 0.57 | 3325.48  | 11010.34 | 29053.89  | 87210.02  |
| 0.17 | 118191009.04  | 401575595.94   | 1107719023.44  | 3599750831.50   | 0.58 | 2656.06  | 8924.40  | 23827.62  | 71922.14  |
| 0.18 | 77098697.71   | 269517860.84   | 762194688.66   | 2341357348.66   | 0.59 | 2166.54  | 7111.48  | 19412.69  | 56842.90  |
| 0.19 | 52706229.64   | 180850880.58   | 504883940.27   | 1631379875.89   | 0.60 | 1767.28  | 5734.98  | 15944.53  | 47166.12  |
| 0.20 | 35943024.17   | 124157574.20   | 341552466.58   | 1118046031.91   | 0.61 | 1465.83  | 4650.83  | 12920.56  | 38160.45  |
| 0.21 | 24840558.52   | 85368535.62    | 235862050.65   | 774076661.21    | 0.62 | 1193.18  | 3706.06  | 10250.36  | 31337.40  |
| 0.22 | 17126689.58   | 60812536.70    | 170740418.21   | 529266172.52    | 0.63 | 978.09   | 3083.25  | 8392.75   | 24757.06  |
| 0.23 | 12663530.30   | 43557337.28    | 120874792.62   | 382517882.72    | 0.64 | 786.04   | 2417.22  | 6579.08   | 19899.13  |
| 0.24 | 9061036.83    | 31615763.43    | 87255075.33    | 284277487.80    | 0.65 | 634.67   | 1959.88  | 5259.28   | 15490.55  |
| 0.25 | 6549097.20    | 22968315.84    | 64351297.74    | 208194368.68    | 0.66 | 511.83   | 1567.24  | 4197.46   | 11975.66  |
| 0.26 | 4773208.66    | 16696823.73    | 48091077.27    | 155318048.20    | 0.67 | 415.48   | 1239.62  | 3234.18   | 9948.45   |
| 0.27 | 3620027.09    | 12555201.98    | 35094570.43    | 112409393.24    | 0.68 | 338.69   | 986.73   | 2531.19   | 7959.75   |
| 0.28 | 2709362.57    | 9297564.71     | 25877479.22    | 83523172.14     | 0.69 | 279.78   | 792.51   | 2019.72   | 6209.09   |
| 0.29 | 1982415.36    | 6979692.67     | 19665521.25    | 61411649.43     | 0.70 | 222.81   | 631.90   | 1616.64   | 4635.48   |
| 0.30 | 1517424.21    | 5233295.61     | 14811801.96    | 46962095.21     | 0.71 | 180.81   | 499.91   | 1301.36   | 3766.52   |
| 0.31 | 1157547.97    | 4024731.64     | 11304957.89    | 36945063.02     | 0.72 | 150.15   | 406.65   | 1028.06   | 2921.14   |
| 0.32 | 880852.09     | 3018472.40     | 8550172.33     | 27679845.90     | 0.73 | 119.84   | 325.57   | 796.09    | 2241.46   |
| 0.33 | 688325.09     | 2370054.23     | 6701813.53     | 22420035.01     | 0.74 | 95.87    | 252.30   | 617.06    | 1734.60   |
| 0.34 | 535950.85     | 1831458.18     | 5220699.07     | 17280223.34     | 0.75 | 77.07    | 199.57   | 481.62    | 1323.34   |
| 0.35 | 421036.30     | 1435882.23     | 4048753.94     | 13255323.33     | 0.76 | 61.58    | 156.14   | 378.55    | 1044.05   |
| 0.36 | 323239.78     | 1129085.85     | 3105941.28     | 10179992.37     | 0.77 | 48.83    | 123.58   | 292.09    | 799.09    |
| 0.37 | 253234.45     | 863849.24      | 2367182.72     | 7542751.64      | 0.78 | 38.40    | 95.45    | 225.39    | 601.74    |
| 0.38 | 199436.83     | 696424.39      | 1925748.27     | 6218531.26      | 0.79 | 30.46    | 73.56    | 167.81    | 443.47    |
| 0.39 | 159222.29     | 544686.65      | 1506753.97     | 4718989.86      | 0.80 | 23.54    | 55.21    | 127.83    | 317.65    |
| 0.40 | 126950.76     | 434210.14      | 1200305.37     | 3898737.91      | 0.81 | 18.58    | 41.98    | 95.74     | 245.13    |
| 0.41 | 101522.22     | 347130.63      | 978998.46      | 2966476.00      | 0.82 | 14.53    | 32.39    | 72.22     | 179.61    |
| 0.42 | 80868.98      | 269117.32      | 762876.39      | 2452257.77      | 0.83 | 11.37    | 24.68    | 52.19     | 127.83    |
| 0.43 | 64920.43      | 220422.73      | 608439.06      | 1882405.51      | 0.84 | 8.68     | 18.14    | 38.32     | 93.13     |
| 0.44 | 51295.73      | 176460.32      | 486748.54      | 1493775.42      | 0.85 | 6.66     | 13.40    | 27.50     | 65.74     |
| 0.45 | 41487.99      | 140816.65      | 396233.35      | 1210074.32      | 0.86 | 5.05     | 9.89     | 19.50     | 46.20     |
| 0.46 | 33585.79      | 111682.57      | 319496.10      | 961241.71       | 0.87 | 3.86     | 7.27     | 13.99     | 31.82     |
| 0.47 | 26949.53      | 92291.76       | 257437.05      | 796598.64       | 0.88 | 2.86     | 5.23     | 9.72      | 21.65     |
| 0.48 | 21792.46      | 74482.77       | 207672.23      | 635073.32       | 0.89 | 2.10     | 3.73     | 6.72      | 14.56     |
| 0.49 | 17664.86      | 58327.28       | 164424.68      | 510636.40       | 0.90 | 1.57     | 2.67     | 4.53      | 9.25      |
| 0.50 | 14174.86      | 48368.78       | 135125.38      | 396708.01       |      |          |          |           |           |

Table S374: Critical values for detector  $\hat{H}_{mov,sn}^{m,0.2}$  with windows size  $n = 0.2$ , and FM-OLS and D-OLS estimation in a model with intercept and linear trend. The number of integrated regressors is 2 and the highest power of  $x_{kt}$  is 3.

| m    | 90 %           | 95 %            | 97,5 %          | 99 %             | m    | 90 %     | 95 %      | 97,5 %    | 99 %       |
|------|----------------|-----------------|-----------------|------------------|------|----------|-----------|-----------|------------|
| 0.10 | 33703471439.10 | 119046635090.26 | 351504348024.80 | 1182896514429.21 | 0.51 | 73139.64 | 275037.01 | 824183.67 | 2613297.94 |
| 0.11 | 17665055121.26 | 63196983119.99  | 185505540875.32 | 601769718278.92  | 0.52 | 58707.53 | 222040.96 | 653889.70 | 2077817.66 |
| 0.12 | 9684934981.94  | 35484677511.91  | 103726577538.50 | 326079957558.35  | 0.53 | 46825.64 | 177209.34 | 514444.32 | 1738204.51 |
| 0.13 | 5595445827.78  | 19683257531.67  | 59507523656.60  | 197915349487.94  | 0.54 | 38326.93 | 144882.89 | 411173.27 | 1396103.68 |
| 0.14 | 3229256590.39  | 11677545161.11  | 35026398248.07  | 126002877292.36  | 0.55 | 31498.61 | 115647.89 | 340009.95 | 1128449.65 |
| 0.15 | 1954780674.26  | 7071721441.12   | 21428028075.56  | 71913747695.99   | 0.56 | 25842.12 | 92992.47  | 280498.02 | 913491.25  |
| 0.16 | 1251502498.72  | 4481862182.44   | 13429813502.21  | 45858192490.06   | 0.57 | 20810.63 | 75079.24  | 220972.71 | 711570.87  |
| 0.17 | 808234623.34   | 2858454183.92   | 8259538217.06   | 29798411895.59   | 0.58 | 16849.80 | 60558.58  | 177664.75 | 594720.56  |
| 0.18 | 532343579.98   | 1937513045.20   | 5501867913.75   | 19479792047.56   | 0.59 | 13747.47 | 48854.50  | 146185.46 | 485475.34  |
| 0.19 | 353802210.21   | 1287075925.34   | 3773835440.64   | 13208069343.13   | 0.60 | 11114.19 | 39074.27  | 116739.34 | 383876.78  |
| 0.20 | 240087495.81   | 888524736.35    | 2644671124.33   | 8963919080.05    | 0.61 | 9001.63  | 31815.99  | 93158.17  | 308159.08  |
| 0.21 | 167656442.40   | 618768011.22    | 1788741153.99   | 6220093253.40    | 0.62 | 7212.81  | 26176.69  | 73569.13  | 238740.68  |
| 0.22 | 117876718.52   | 439693707.88    | 1292500936.22   | 4434165337.62    | 0.63 | 5851.79  | 21284.73  | 60371.46  | 192933.35  |
| 0.23 | 82767250.44    | 310405817.31    | 940910183.32    | 3128882285.35    | 0.64 | 4682.40  | 17168.56  | 48436.37  | 155408.20  |
| 0.24 | 61255613.35    | 228294455.77    | 681142922.03    | 2337182478.90    | 0.65 | 3809.87  | 13336.44  | 38519.32  | 122696.60  |
| 0.25 | 44189834.18    | 165925617.84    | 496343120.65    | 1706934455.26    | 0.66 | 3083.79  | 10527.45  | 30908.92  | 94818.71   |
| 0.26 | 32615250.67    | 122599440.31    | 361939485.21    | 1284206576.02    | 0.67 | 2460.83  | 8392.69   | 24551.71  | 75933.80   |
| 0.27 | 24012314.01    | 90524936.37     | 273794445.82    | 942928678.07     | 0.68 | 1981.20  | 6640.42   | 19138.26  | 59856.28   |
| 0.28 | 17863508.02    | 68135465.53     | 206795367.53    | 698560672.45     | 0.69 | 1608.38  | 5257.55   | 15373.58  | 48647.38   |
| 0.29 | 13184311.96    | 50070603.74     | 151407138.62    | 539761512.31     | 0.70 | 1302.34  | 4155.46   | 12123.63  | 36913.34   |
| 0.30 | 10218626.39    | 37146523.83     | 111613340.24    | 386777434.46     | 0.71 | 1041.98  | 3370.63   | 9458.04   | 29998.01   |
| 0.31 | 7771101.42     | 28214880.37     | 84405052.29     | 302622248.27     | 0.72 | 841.33   | 2713.83   | 7636.18   | 22768.89   |
| 0.32 | 5944100.39     | 21794493.97     | 65154389.21     | 231113207.88     | 0.73 | 674.56   | 2141.48   | 5825.97   | 17273.61   |
| 0.33 | 4625523.61     | 16931170.74     | 49803859.24     | 177556381.41     | 0.74 | 531.84   | 1695.51   | 4484.80   | 13624.13   |
| 0.34 | 3606483.03     | 13060116.14     | 40624650.42     | 140139782.71     | 0.75 | 418.92   | 1316.81   | 3452.24   | 10332.87   |
| 0.35 | 2785141.60     | 10226551.69     | 31126527.88     | 105904443.70     | 0.76 | 329.11   | 1018.76   | 2634.51   | 7750.49    |
| 0.36 | 2181795.29     | 8001423.14      | 23642500.24     | 80667805.39      | 0.77 | 256.80   | 781.84    | 2033.35   | 5904.77    |
| 0.37 | 1712659.26     | 6340488.52      | 18054418.06     | 63673757.40      | 0.78 | 202.47   | 603.69    | 1526.67   | 4514.15    |
| 0.38 | 1349847.84     | 4969233.14      | 14574964.74     | 51169896.57      | 0.79 | 157.63   | 457.72    | 1179.57   | 3490.05    |
| 0.39 | 1054728.07     | 3989716.69      | 11602737.88     | 39572148.73      | 0.80 | 120.81   | 349.20    | 894.07    | 2585.47    |
| 0.40 | 835314.93      | 3204967.33      | 9240543.76      | 31315241.04      | 0.81 | 94.76    | 263.65    | 674.28    | 1899.50    |
| 0.41 | 651306.99      | 2463173.98      | 7414487.91      | 25236805.42      | 0.82 | 72.77    | 197.09    | 513.24    | 1389.87    |
| 0.42 | 522302.37      | 1928723.45      | 5855897.62      | 19977868.34      | 0.83 | 55.58    | 147.16    | 361.58    | 996.84     |
| 0.43 | 411860.40      | 1542468.12      | 4604111.14      | 15876657.37      | 0.84 | 42.64    | 107.82    | 260.99    | 710.15     |
| 0.44 | 336719.10      | 1241050.26      | 3657872.56      | 12211686.09      | 0.85 | 32.43    | 77.66     | 184.82    | 503.50     |
| 0.45 | 267868.20      | 992820.28       | 2946526.65      | 9970225.53       | 0.86 | 24.30    | 56.20     | 129.59    | 347.18     |
| 0.46 | 217470.10      | 807755.70       | 2348555.95      | 8016673.09       | 0.87 | 18.03    | 40.02     | 90.88     | 241.48     |
| 0.47 | 173359.19      | 638994.86       | 1887663.26      | 6534656.51       | 0.88 | 13.33    | 28.86     | 61.76     | 161.01     |
| 0.48 | 138771.33      | 519723.77       | 1558689.11      | 4992118.61       | 0.89 | 9.78     | 19.95     | 41.68     | 104.96     |
| 0.49 | 111005.07      | 415010.31       | 1255281.08      | 4145236.14       | 0.90 | 7.15     | 14.00     | 28.49     | 68.70      |
| 0.50 | 89564.98       | 343191.80       | 1007383.49      | 3329234.55       |      |          |           |           |            |

Table S375: Critical values for detector  $\hat{H}_{mov,sn}^{m,0.2}$  with windows size  $n = 0.2$ , and IM-OLS estimation in a model with intercept and linear trend. The number of integrated regressors is 2 and the highest power of  $x_{kt}$  is 3.



| m    | 90 %          | 95 %           | 97,5 %         | 99 %            | m    | 90 %     | 95 %     | 97,5 %    | 99 %      |
|------|---------------|----------------|----------------|-----------------|------|----------|----------|-----------|-----------|
| 0.10 | 5114871616.17 | 17793573319.69 | 48453423413.25 | 154550193853.40 | 0.51 | 12200.57 | 41571.17 | 118330.69 | 336467.94 |
| 0.11 | 2684763667.20 | 8802607069.52  | 25203310560.09 | 78045791381.62  | 0.52 | 9933.06  | 33755.77 | 92452.67  | 275444.20 |
| 0.12 | 1497637133.17 | 5119079149.63  | 14124293014.65 | 43108059314.08  | 0.53 | 8026.91  | 26359.87 | 72334.94  | 218546.25 |
| 0.13 | 852164332.39  | 2911688967.21  | 8256154254.27  | 24835056713.01  | 0.54 | 6428.00  | 21696.47 | 58167.07  | 178323.41 |
| 0.14 | 517832015.35  | 1769313330.79  | 4967950057.11  | 15523368363.68  | 0.55 | 5192.90  | 17443.78 | 46078.36  | 139814.23 |
| 0.15 | 315803850.10  | 1112625720.08  | 3153945665.20  | 9577993696.36   | 0.56 | 4263.69  | 14245.88 | 38787.20  | 112981.62 |
| 0.16 | 195099429.19  | 680770339.99   | 1937486598.79  | 6243661200.82   | 0.57 | 3464.24  | 11485.50 | 30314.44  | 89884.40  |
| 0.17 | 128046581.73  | 438595638.38   | 1214326707.17  | 3997716637.51   | 0.58 | 2773.32  | 9270.85  | 24645.51  | 73988.21  |
| 0.18 | 83604379.70   | 293358551.21   | 834563001.53   | 2591988650.63   | 0.59 | 2261.19  | 7346.21  | 20002.28  | 58369.54  |
| 0.19 | 56960599.79   | 197759654.63   | 550372003.62   | 1798080340.03   | 0.60 | 1835.56  | 5920.15  | 16479.95  | 48471.18  |
| 0.20 | 38749977.74   | 134344257.26   | 376217894.51   | 1225660675.75   | 0.61 | 1523.11  | 4754.92  | 13278.48  | 38918.76  |
| 0.21 | 26831024.17   | 92786747.36    | 257422901.67   | 850165222.19    | 0.62 | 1237.50  | 3816.68  | 10495.09  | 31853.87  |
| 0.22 | 18585350.70   | 66077728.42    | 185312736.62   | 582933868.27    | 0.63 | 1008.28  | 3158.33  | 8574.69   | 25180.55  |
| 0.23 | 13709284.19   | 47561417.83    | 131810299.83   | 421368673.03    | 0.64 | 810.19   | 2473.57  | 6723.00   | 20096.48  |
| 0.24 | 9786458.09    | 34456641.36    | 95351521.82    | 312845282.12    | 0.65 | 654.19   | 1995.65  | 5337.87   | 15779.55  |
| 0.25 | 7075415.93    | 25000459.22    | 69825237.88    | 227667779.76    | 0.66 | 523.56   | 1590.36  | 4244.83   | 12237.60  |
| 0.26 | 5175551.58    | 18178089.99    | 52311866.43    | 169271109.79    | 0.67 | 424.95   | 1261.40  | 3267.11   | 10092.14  |
| 0.27 | 3929301.70    | 13692399.58    | 38388328.43    | 123168206.19    | 0.68 | 344.19   | 999.45   | 2552.11   | 8001.93   |
| 0.28 | 2922014.79    | 10097114.38    | 28377277.71    | 91552277.02     | 0.69 | 284.11   | 801.83   | 2042.73   | 6228.08   |
| 0.29 | 2131901.36    | 7577889.66     | 21460220.01    | 67224285.68     | 0.70 | 225.93   | 636.67   | 1633.05   | 4653.41   |
| 0.30 | 1633793.06    | 5664518.47     | 16124936.17    | 51284872.64     | 0.71 | 182.50   | 504.12   | 1309.29   | 3781.28   |
| 0.31 | 1249672.60    | 4344165.92     | 12409431.56    | 40602819.84     | 0.72 | 151.50   | 409.23   | 1031.84   | 2926.16   |
| 0.32 | 958949.72     | 3258933.32     | 9372946.01     | 30537025.94     | 0.73 | 120.77   | 327.11   | 798.37    | 2244.45   |
| 0.33 | 740993.03     | 2574461.12     | 7257657.52     | 24152855.38     | 0.74 | 96.38    | 253.46   | 618.41    | 1735.15   |
| 0.34 | 577237.32     | 1981488.40     | 5622107.41     | 18665357.90     | 0.75 | 77.37    | 200.00   | 482.08    | 1324.58   |
| 0.35 | 456120.85     | 1551345.93     | 4400797.07     | 14392261.74     | 0.76 | 61.82    | 156.37   | 378.71    | 1044.40   |
| 0.36 | 348131.69     | 1223854.94     | 3348074.51     | 11044248.41     | 0.77 | 48.95    | 123.71   | 292.17    | 799.41    |
| 0.37 | 273115.37     | 935084.66      | 2577151.55     | 8169018.21      | 0.78 | 38.49    | 95.58    | 225.46    | 601.92    |
| 0.38 | 214970.60     | 747589.62      | 2070346.81     | 6732449.38      | 0.79 | 30.54    | 73.64    | 167.90    | 443.61    |
| 0.39 | 170810.21     | 586320.02      | 1623618.17     | 5139132.74      | 0.80 | 23.65    | 55.32    | 127.94    | 317.79    |
| 0.40 | 135379.56     | 466341.18      | 1288858.79     | 4191366.89      | 0.81 | 18.69    | 42.06    | 95.86     | 245.25    |
| 0.41 | 109157.42     | 374239.30      | 1053674.69     | 3213771.51      | 0.82 | 14.64    | 32.53    | 72.30     | 179.72    |
| 0.42 | 85974.15      | 289736.33      | 819655.12      | 2616848.18      | 0.83 | 11.48    | 24.76    | 52.32     | 127.97    |
| 0.43 | 69660.56      | 235577.45      | 650535.95      | 2000869.26      | 0.84 | 8.80     | 18.26    | 38.44     | 93.25     |
| 0.44 | 54991.27      | 187608.93      | 519933.24      | 1604735.35      | 0.85 | 6.78     | 13.53    | 27.62     | 65.81     |
| 0.45 | 44481.76      | 150777.02      | 424956.47      | 1285575.84      | 0.86 | 5.17     | 10.00    | 19.63     | 46.30     |
| 0.46 | 35836.05      | 119272.07      | 336710.99      | 1031326.91      | 0.87 | 3.98     | 7.39     | 14.12     | 31.93     |
| 0.47 | 28652.10      | 98328.86       | 274326.44      | 840993.18       | 0.88 | 2.99     | 5.36     | 9.86      | 21.73     |
| 0.48 | 23199.64      | 79171.91       | 220380.71      | 671117.02       | 0.89 | 2.22     | 3.85     | 6.85      | 14.66     |
| 0.49 | 18630.54      | 61762.11       | 174213.33      | 537600.40       | 0.90 | 1.70     | 2.79     | 4.66      | 9.36      |
| 0.50 | 14975.85      | 50956.84       | 142896.87      | 418864.26       |      |          |          |           |           |

Table S376: Critical values for detector  $\hat{H}_{mov,sn}^{m,0.3}$  with windows size  $n = 0.3$ , and FM-OLS and D-OLS estimation in a model with intercept and linear trend. The number of integrated regressors is 2 and the highest power of  $x_{kt}$  is 3.

| m    | 90 %           | 95 %            | 97,5 %          | 99 %             | m    | 90 %     | 95 %      | 97,5 %    | 99 %       |
|------|----------------|-----------------|-----------------|------------------|------|----------|-----------|-----------|------------|
| 0.10 | 36142642283.70 | 129431514394.75 | 383784193187.27 | 1294438784159.78 | 0.51 | 76773.79 | 288911.24 | 861496.23 | 2729776.88 |
| 0.11 | 19032802386.97 | 68770823440.39  | 199666373281.44 | 657908393993.67  | 0.52 | 61778.76 | 231945.29 | 684009.02 | 2196515.71 |
| 0.12 | 10448257877.20 | 38470865047.55  | 112825697266.53 | 354859196447.49  | 0.53 | 49400.53 | 186732.34 | 537192.57 | 1808726.21 |
| 0.13 | 6019531845.34  | 21314278856.63  | 64961451870.19  | 216696480588.14  | 0.54 | 40164.81 | 152404.04 | 431991.44 | 1460676.29 |
| 0.14 | 3498241450.01  | 12674153352.79  | 37858045878.34  | 138420513177.08  | 0.55 | 33022.84 | 120833.09 | 355877.04 | 1167940.70 |
| 0.15 | 2099391089.31  | 7693164662.75   | 23383710647.72  | 79146078532.66   | 0.56 | 27043.46 | 96962.83  | 292339.43 | 948322.79  |
| 0.16 | 1353469866.52  | 4895776968.38   | 14766430502.58  | 50349472150.67   | 0.57 | 21746.71 | 78214.79  | 230545.09 | 738628.49  |
| 0.17 | 870973268.83   | 3109632972.28   | 8994073128.83   | 32990555991.81   | 0.58 | 17531.40 | 63018.14  | 184106.33 | 613459.82  |
| 0.18 | 573100915.66   | 2095915551.56   | 5975670174.38   | 21498651698.90   | 0.59 | 14252.84 | 50485.99  | 149747.08 | 503040.92  |
| 0.19 | 382859012.20   | 1393119833.96   | 4114857896.98   | 14600187602.40   | 0.60 | 11513.87 | 40249.74  | 120026.04 | 395385.56  |
| 0.20 | 259768527.40   | 965690932.86    | 2921650532.16   | 9830012689.86    | 0.61 | 9332.08  | 32631.63  | 96154.17  | 316355.67  |
| 0.21 | 179790016.02   | 675614637.81    | 1949518403.36   | 6807785796.72    | 0.62 | 7489.80  | 26826.70  | 75349.31  | 243191.89  |
| 0.22 | 127324887.28   | 478541958.30    | 1423942582.30   | 4895445544.24    | 0.63 | 6010.23  | 21841.01  | 61833.50  | 196684.92  |
| 0.23 | 90088865.76    | 336391196.71    | 1022465470.95   | 3424230217.28    | 0.64 | 4807.52  | 17561.34  | 49492.32  | 157016.97  |
| 0.24 | 66266772.76    | 250439117.98    | 737609650.48    | 2559624457.43    | 0.65 | 3906.15  | 13556.49  | 39147.25  | 124568.83  |
| 0.25 | 47859956.01    | 181247276.74    | 546927980.34    | 1871797760.23    | 0.66 | 3157.05  | 10735.51  | 31346.44  | 96427.43   |
| 0.26 | 35007981.78    | 132696991.43    | 396124320.61    | 1397689150.70    | 0.67 | 2511.05  | 8547.55   | 24851.72  | 76516.94   |
| 0.27 | 25755153.81    | 97831572.98     | 300329233.84    | 1040897151.88    | 0.68 | 2016.40  | 6718.71   | 19388.50  | 60498.02   |
| 0.28 | 19246070.11    | 74086328.45     | 223996276.56    | 765755149.48     | 0.69 | 1633.86  | 5334.26   | 15487.13  | 48892.97   |
| 0.29 | 14180755.32    | 54489700.27     | 164763919.31    | 582151230.13     | 0.70 | 1317.56  | 4185.09   | 12188.97  | 37130.18   |
| 0.30 | 11055180.71    | 40451788.57     | 121290690.08    | 423964805.84     | 0.71 | 1052.77  | 3396.56   | 9494.76   | 30138.57   |
| 0.31 | 8385323.50     | 30395578.33     | 91692025.09     | 328002706.35     | 0.72 | 846.80   | 2724.35   | 7655.19   | 22816.47   |
| 0.32 | 6401324.38     | 23720586.34     | 70457560.16     | 252035982.54     | 0.73 | 679.89   | 2151.66   | 5838.70   | 17371.30   |
| 0.33 | 4955598.04     | 18394245.80     | 53795158.33     | 191312745.06     | 0.74 | 535.81   | 1697.93   | 4507.72   | 13625.04   |
| 0.34 | 3866454.54     | 14048252.06     | 43717650.07     | 151485333.18     | 0.75 | 420.77   | 1319.49   | 3457.53   | 10345.17   |
| 0.35 | 2989242.75     | 11028932.61     | 34062423.56     | 115273566.54     | 0.76 | 330.10   | 1020.11   | 2635.88   | 7755.33    |
| 0.36 | 2363211.83     | 8644612.63      | 25564807.26     | 87664401.72      | 0.77 | 257.40   | 782.66    | 2036.41   | 5908.58    |
| 0.37 | 1841342.27     | 6779023.42      | 19488030.33     | 68820296.60      | 0.78 | 202.74   | 603.99    | 1527.01   | 4514.42    |
| 0.38 | 1450152.33     | 5330198.12      | 15643259.74     | 55001018.85      | 0.79 | 157.78   | 457.92    | 1179.65   | 3490.29    |
| 0.39 | 1126173.96     | 4284096.62      | 12563692.28     | 42779422.82      | 0.80 | 120.95   | 349.32    | 894.19    | 2585.60    |
| 0.40 | 891970.58      | 3416510.20      | 9922101.45      | 33640450.43      | 0.81 | 94.85    | 263.76    | 674.45    | 1899.69    |
| 0.41 | 695584.00      | 2640100.24      | 7963257.18      | 27103724.77      | 0.82 | 72.92    | 197.25    | 513.35    | 1390.00    |
| 0.42 | 557032.01      | 2073200.05      | 6313431.12      | 21365023.98      | 0.83 | 55.71    | 147.25    | 361.67    | 996.93     |
| 0.43 | 438885.61      | 1641521.19      | 4918400.72      | 17020908.57      | 0.84 | 42.77    | 107.92    | 261.07    | 710.29     |
| 0.44 | 357902.07      | 1331787.80      | 3924659.06      | 12967206.86      | 0.85 | 32.54    | 77.77     | 185.04    | 503.59     |
| 0.45 | 284681.36      | 1058350.63      | 3132131.87      | 10620699.35      | 0.86 | 24.41    | 56.34     | 129.76    | 347.30     |
| 0.46 | 230456.40      | 859981.81       | 2502790.31      | 8542734.74       | 0.87 | 18.13    | 40.16     | 90.97     | 241.54     |
| 0.47 | 184765.87      | 677125.78       | 2004138.15      | 6862551.03       | 0.88 | 13.44    | 28.99     | 61.93     | 161.13     |
| 0.48 | 147808.22      | 548721.97       | 1660406.00      | 5349175.80       | 0.89 | 9.89     | 20.05     | 41.76     | 105.08     |
| 0.49 | 118084.98      | 438843.17       | 1313108.72      | 4362093.24       | 0.90 | 7.26     | 14.11     | 28.59     | 68.83      |
| 0.50 | 94580.31       | 362770.54       | 1063654.37      | 3513503.83       |      |          |           |           |            |

Table S377: Critical values for detector  $\hat{H}_{mov,sn}^{m,0.3}$  with windows size  $n = 0.3$ , and IM-OLS estimation in a model with intercept and linear trend. The number of integrated regressors is 2 and the highest power of  $x_{kt}$  is 3.

### 5.3 Number of I(1) regressors: 3

| m    | 90 %      | 95 %       | 97,5 %     | 99 %       | m    | 90 %   | 95 %   | 97,5 % | 99 %   |
|------|-----------|------------|------------|------------|------|--------|--------|--------|--------|
| 0.10 | 733792.03 | 1256543.19 | 1974005.92 | 3235690.90 | 0.51 | 195.41 | 329.07 | 514.37 | 838.02 |
| 0.11 | 479045.77 | 822869.38  | 1295056.30 | 2159170.53 | 0.52 | 171.17 | 290.72 | 449.88 | 740.91 |
| 0.12 | 326423.90 | 562852.60  | 883248.34  | 1461126.98 | 0.53 | 151.09 | 255.79 | 395.86 | 653.85 |
| 0.13 | 230670.06 | 397317.73  | 615849.73  | 1022685.14 | 0.54 | 133.43 | 227.69 | 345.07 | 572.10 |
| 0.14 | 163952.25 | 283707.87  | 442642.37  | 725031.08  | 0.55 | 117.72 | 197.32 | 306.99 | 500.98 |
| 0.15 | 119760.34 | 208151.28  | 328564.49  | 544241.65  | 0.56 | 104.28 | 176.10 | 268.34 | 431.13 |
| 0.16 | 89542.89  | 154915.45  | 247796.37  | 414685.96  | 0.57 | 91.79  | 154.50 | 236.39 | 377.97 |
| 0.17 | 67323.20  | 117623.14  | 184874.92  | 311608.64  | 0.58 | 80.65  | 135.23 | 209.28 | 327.47 |
| 0.18 | 51592.60  | 90297.63   | 142702.04  | 238018.85  | 0.59 | 71.05  | 119.51 | 184.13 | 290.15 |
| 0.19 | 40173.63  | 69252.34   | 110625.41  | 180123.46  | 0.60 | 63.04  | 104.39 | 160.28 | 257.97 |
| 0.20 | 31403.35  | 54307.45   | 85814.58   | 141368.82  | 0.61 | 55.34  | 92.84  | 140.13 | 223.99 |
| 0.21 | 24989.21  | 43189.04   | 68433.13   | 113680.07  | 0.62 | 49.09  | 81.24  | 124.18 | 196.82 |
| 0.22 | 19887.61  | 34287.15   | 55411.47   | 91246.93   | 0.63 | 43.13  | 71.51  | 108.76 | 172.18 |
| 0.23 | 16121.62  | 27737.15   | 44331.76   | 73358.40   | 0.64 | 37.96  | 62.41  | 95.31  | 148.38 |
| 0.24 | 13155.27  | 22586.69   | 36018.59   | 60126.64   | 0.65 | 33.06  | 54.95  | 83.35  | 133.90 |
| 0.25 | 10690.63  | 18491.48   | 29175.50   | 48052.44   | 0.66 | 29.03  | 47.79  | 72.52  | 116.67 |
| 0.26 | 8787.98   | 15372.29   | 23872.15   | 40200.27   | 0.67 | 25.46  | 41.91  | 63.06  | 101.96 |
| 0.27 | 7286.33   | 12633.02   | 20079.29   | 33287.23   | 0.68 | 22.35  | 36.69  | 56.12  | 87.95  |
| 0.28 | 6022.10   | 10589.52   | 16547.15   | 27153.29   | 0.69 | 19.53  | 32.04  | 48.59  | 78.55  |
| 0.29 | 5012.48   | 8763.09    | 13628.06   | 22489.87   | 0.70 | 17.09  | 28.13  | 42.94  | 68.09  |
| 0.30 | 4208.29   | 7251.57    | 11419.37   | 18866.93   | 0.71 | 15.03  | 24.65  | 37.25  | 58.43  |
| 0.31 | 3563.41   | 6067.11    | 9655.67    | 15498.82   | 0.72 | 13.22  | 21.47  | 31.93  | 49.91  |
| 0.32 | 3006.63   | 5170.02    | 8156.71    | 13317.24   | 0.73 | 11.57  | 18.50  | 27.70  | 42.23  |
| 0.33 | 2551.50   | 4356.83    | 6883.17    | 11349.04   | 0.74 | 10.03  | 15.98  | 23.77  | 36.66  |
| 0.34 | 2191.18   | 3724.35    | 5901.19    | 9583.07    | 0.75 | 8.65   | 13.79  | 20.38  | 31.75  |
| 0.35 | 1869.16   | 3215.82    | 5020.97    | 8256.63    | 0.76 | 7.50   | 12.10  | 17.92  | 27.78  |
| 0.36 | 1587.40   | 2758.60    | 4352.81    | 6993.38    | 0.77 | 6.53   | 10.35  | 15.33  | 23.29  |
| 0.37 | 1375.73   | 2382.77    | 3728.85    | 6142.22    | 0.78 | 5.61   | 8.91   | 13.19  | 19.88  |
| 0.38 | 1184.13   | 2053.62    | 3230.10    | 5272.19    | 0.79 | 4.81   | 7.59   | 11.07  | 16.88  |
| 0.39 | 1014.11   | 1767.76    | 2766.71    | 4509.65    | 0.80 | 4.08   | 6.48   | 9.37   | 14.30  |
| 0.40 | 882.12    | 1517.78    | 2361.00    | 3970.03    | 0.81 | 3.50   | 5.51   | 7.97   | 12.11  |
| 0.41 | 765.91    | 1327.70    | 2048.37    | 3397.45    | 0.82 | 2.93   | 4.64   | 6.73   | 10.12  |
| 0.42 | 664.14    | 1134.60    | 1788.66    | 2974.82    | 0.83 | 2.48   | 3.92   | 5.65   | 8.41   |
| 0.43 | 574.80    | 988.69     | 1533.35    | 2613.58    | 0.84 | 2.06   | 3.22   | 4.70   | 7.01   |
| 0.44 | 503.08    | 861.79     | 1348.33    | 2199.96    | 0.85 | 1.72   | 2.67   | 3.83   | 5.69   |
| 0.45 | 439.50    | 752.26     | 1184.70    | 1940.37    | 0.86 | 1.42   | 2.17   | 3.12   | 4.65   |
| 0.46 | 383.52    | 656.63     | 1024.35    | 1695.12    | 0.87 | 1.14   | 1.76   | 2.50   | 3.68   |
| 0.47 | 334.10    | 571.86     | 890.17     | 1481.68    | 0.88 | 0.91   | 1.42   | 1.99   | 2.90   |
| 0.48 | 290.96    | 503.53     | 775.68     | 1260.80    | 0.89 | 0.72   | 1.10   | 1.54   | 2.25   |
| 0.49 | 253.72    | 434.98     | 679.24     | 1115.49    | 0.90 | 0.56   | 0.84   | 1.18   | 1.73   |
| 0.50 | 222.27    | 375.72     | 588.56     | 970.20     |      |        |        |        |        |

Table S378: Critical values for detector  $\hat{H}_{mov,sn}^{m,0.1}$  with windows size  $n = 0.1$ , and FM-OLS and D-OLS estimation in a model with intercept. The number of integrated regressors is 3 and the highest power of  $x_{kt}$  is 1.

| m    | 90 %       | 95 %       | 97,5 %     | 99 %        | m    | 90 %   | 95 %    | 97,5 %  | 99 %    |
|------|------------|------------|------------|-------------|------|--------|---------|---------|---------|
| 0.10 | 3355059.14 | 5665499.81 | 8779420.95 | 14357497.39 | 0.51 | 862.06 | 1450.53 | 2260.63 | 3656.42 |
| 0.11 | 2198507.61 | 3745462.15 | 5778854.23 | 9626070.29  | 0.52 | 757.57 | 1268.06 | 1968.17 | 3213.28 |
| 0.12 | 1497309.25 | 2557614.06 | 3919945.98 | 6528574.87  | 0.53 | 663.42 | 1108.05 | 1719.33 | 2784.28 |
| 0.13 | 1045955.80 | 1769440.78 | 2768723.07 | 4483170.52  | 0.54 | 587.15 | 977.27  | 1501.94 | 2452.19 |
| 0.14 | 746479.65  | 1275036.67 | 2004380.98 | 3273677.28  | 0.55 | 519.52 | 858.83  | 1316.17 | 2127.64 |
| 0.15 | 546220.02  | 929206.09  | 1468562.59 | 2451134.04  | 0.56 | 455.62 | 759.64  | 1148.17 | 1864.62 |
| 0.16 | 405570.29  | 687448.32  | 1084200.82 | 1821048.96  | 0.57 | 401.94 | 668.76  | 1004.48 | 1632.42 |
| 0.17 | 304909.01  | 525388.73  | 813918.57  | 1355292.87  | 0.58 | 353.91 | 586.55  | 884.90  | 1408.08 |
| 0.18 | 233031.20  | 400112.26  | 629222.73  | 1056260.81  | 0.59 | 311.00 | 514.91  | 779.61  | 1232.85 |
| 0.19 | 181826.93  | 307631.25  | 486625.74  | 803039.27   | 0.60 | 272.34 | 455.31  | 681.82  | 1067.99 |
| 0.20 | 141019.33  | 238821.36  | 376255.78  | 623985.88   | 0.61 | 239.48 | 398.59  | 596.81  | 939.65  |
| 0.21 | 112441.82  | 191435.68  | 294450.88  | 482353.11   | 0.62 | 211.32 | 350.98  | 526.07  | 821.80  |
| 0.22 | 89189.13   | 152704.90  | 236416.17  | 386805.48   | 0.63 | 186.79 | 306.66  | 464.10  | 729.46  |
| 0.23 | 71801.80   | 122556.31  | 192836.58  | 309303.04   | 0.64 | 164.69 | 268.76  | 407.67  | 634.01  |
| 0.24 | 58535.95   | 98846.68   | 154880.18  | 257597.81   | 0.65 | 144.00 | 235.81  | 357.31  | 559.16  |
| 0.25 | 47856.84   | 80879.62   | 126104.98  | 209064.86   | 0.66 | 126.48 | 207.04  | 311.24  | 488.57  |
| 0.26 | 39363.71   | 66003.70   | 103553.38  | 171225.59   | 0.67 | 111.58 | 179.61  | 269.93  | 422.51  |
| 0.27 | 32511.35   | 54990.73   | 86187.20   | 141685.04   | 0.68 | 97.97  | 157.64  | 234.08  | 371.47  |
| 0.28 | 27036.85   | 45925.60   | 70885.10   | 119128.34   | 0.69 | 85.49  | 137.73  | 205.10  | 322.35  |
| 0.29 | 22558.59   | 38593.01   | 59004.99   | 97829.14    | 0.70 | 75.26  | 120.72  | 179.44  | 281.08  |
| 0.30 | 18915.73   | 32254.05   | 48926.01   | 81463.12    | 0.71 | 65.97  | 104.61  | 156.03  | 245.10  |
| 0.31 | 15933.58   | 27097.89   | 41838.57   | 69117.71    | 0.72 | 57.55  | 91.15   | 134.29  | 211.21  |
| 0.32 | 13546.60   | 23048.86   | 35250.76   | 58370.60    | 0.73 | 50.27  | 79.52   | 117.32  | 182.37  |
| 0.33 | 11493.85   | 19534.06   | 30017.92   | 48637.25    | 0.74 | 43.77  | 69.55   | 101.07  | 154.40  |
| 0.34 | 9760.22    | 16550.92   | 25552.05   | 41430.74    | 0.75 | 37.95  | 59.84   | 87.33   | 131.49  |
| 0.35 | 8339.04    | 14086.62   | 21867.50   | 35072.09    | 0.76 | 32.83  | 51.41   | 75.23   | 112.75  |
| 0.36 | 7096.60    | 12107.43   | 18712.99   | 30120.41    | 0.77 | 28.38  | 44.15   | 64.57   | 96.92   |
| 0.37 | 6121.85    | 10350.78   | 16010.78   | 26177.83    | 0.78 | 24.42  | 37.84   | 54.90   | 82.84   |
| 0.38 | 5323.56    | 9010.08    | 13704.94   | 22533.94    | 0.79 | 21.08  | 32.40   | 47.02   | 70.59   |
| 0.39 | 4544.47    | 7750.54    | 11945.24   | 19366.37    | 0.80 | 18.02  | 27.63   | 39.87   | 59.67   |
| 0.40 | 3919.39    | 6642.11    | 10321.53   | 16694.72    | 0.81 | 15.37  | 23.54   | 33.66   | 50.00   |
| 0.41 | 3378.22    | 5769.32    | 8878.10    | 14572.09    | 0.82 | 13.11  | 19.91   | 28.29   | 42.13   |
| 0.42 | 2942.49    | 4999.52    | 7695.75    | 12408.88    | 0.83 | 11.20  | 16.81   | 23.71   | 34.90   |
| 0.43 | 2547.59    | 4353.93    | 6714.41    | 10723.52    | 0.84 | 9.41   | 14.11   | 19.75   | 28.69   |
| 0.44 | 2222.43    | 3803.54    | 5862.40    | 9525.68     | 0.85 | 7.87   | 11.83   | 16.48   | 23.66   |
| 0.45 | 1949.64    | 3317.61    | 5048.37    | 8223.28     | 0.86 | 6.56   | 9.82    | 13.56   | 19.26   |
| 0.46 | 1699.44    | 2861.15    | 4433.91    | 7265.41     | 0.87 | 5.41   | 8.04    | 11.02   | 15.44   |
| 0.47 | 1477.97    | 2490.59    | 3885.96    | 6394.48     | 0.88 | 4.45   | 6.51    | 8.86    | 12.42   |
| 0.48 | 1285.12    | 2185.13    | 3389.80    | 5563.59     | 0.89 | 3.60   | 5.22    | 7.09    | 9.79    |
| 0.49 | 1128.41    | 1905.14    | 2966.45    | 4821.49     | 0.90 | 2.88   | 4.15    | 5.60    | 7.68    |
| 0.50 | 984.23     | 1661.93    | 2585.99    | 4217.58     |      |        |         |         |         |

Table S379: Critical values for detector  $\hat{H}_{mov,sn}^{m,0.1}$  with windows size  $n = 0.1$ , and IM-OLS estimation in a model with intercept. The number of integrated regressors is 3 and the highest power of  $x_{kt}$  is 1.

| m    | 90 %       | 95 %       | 97,5 %     | 99 %       | m    | 90 %   | 95 %   | 97,5 % | 99 %    |
|------|------------|------------|------------|------------|------|--------|--------|--------|---------|
| 0.10 | 1167258.83 | 2024398.00 | 3200995.42 | 5291746.01 | 0.51 | 291.91 | 491.71 | 770.01 | 1267.73 |
| 0.11 | 767299.96  | 1330439.96 | 2099216.93 | 3534525.51 | 0.52 | 255.45 | 433.14 | 672.03 | 1105.53 |
| 0.12 | 523688.25  | 908889.51  | 1445355.26 | 2396205.17 | 0.53 | 223.00 | 380.21 | 585.71 | 977.73  |
| 0.13 | 369497.87  | 638376.56  | 1002585.37 | 1670904.66 | 0.54 | 196.78 | 335.32 | 510.12 | 838.43  |
| 0.14 | 263520.85  | 457537.16  | 721342.92  | 1191527.74 | 0.55 | 172.66 | 291.07 | 450.66 | 730.41  |
| 0.15 | 192051.47  | 337601.11  | 537365.65  | 894421.63  | 0.56 | 152.08 | 257.02 | 391.05 | 625.72  |
| 0.16 | 143220.85  | 251006.97  | 401893.13  | 678043.97  | 0.57 | 133.48 | 225.56 | 342.77 | 545.65  |
| 0.17 | 107696.20  | 190052.27  | 300650.41  | 508378.03  | 0.58 | 116.64 | 194.66 | 301.51 | 473.70  |
| 0.18 | 82737.64   | 145354.86  | 231586.55  | 390474.00  | 0.59 | 102.17 | 171.86 | 264.75 | 413.75  |
| 0.19 | 64346.79   | 112163.74  | 179836.56  | 294878.16  | 0.60 | 89.95  | 149.59 | 228.40 | 364.90  |
| 0.20 | 50504.34   | 87537.38   | 139455.06  | 231032.33  | 0.61 | 78.51  | 131.52 | 198.98 | 312.92  |
| 0.21 | 40024.59   | 69671.25   | 110846.26  | 186022.72  | 0.62 | 69.01  | 114.23 | 173.14 | 276.19  |
| 0.22 | 31838.26   | 55522.90   | 89936.58   | 148335.43  | 0.63 | 60.56  | 99.67  | 151.55 | 239.33  |
| 0.23 | 25794.71   | 44597.29   | 71455.73   | 118852.64  | 0.64 | 52.89  | 86.62  | 131.26 | 204.12  |
| 0.24 | 21053.91   | 36341.87   | 58227.91   | 97414.03   | 0.65 | 45.50  | 75.62  | 114.16 | 182.75  |
| 0.25 | 17149.12   | 29721.57   | 46786.74   | 77937.09   | 0.66 | 39.50  | 65.29  | 98.34  | 157.26  |
| 0.26 | 14047.57   | 24654.89   | 38483.50   | 65065.49   | 0.67 | 34.69  | 56.71  | 84.73  | 136.50  |
| 0.27 | 11607.57   | 20279.77   | 32287.93   | 53868.73   | 0.68 | 30.18  | 49.27  | 74.98  | 116.53  |
| 0.28 | 9609.52    | 16873.59   | 26609.63   | 43521.25   | 0.69 | 26.26  | 42.73  | 64.43  | 103.31  |
| 0.29 | 7967.23    | 13999.68   | 21966.43   | 36272.68   | 0.70 | 22.72  | 37.03  | 56.12  | 88.33   |
| 0.30 | 6688.25    | 11563.70   | 18244.03   | 30256.99   | 0.71 | 19.73  | 32.09  | 48.20  | 75.36   |
| 0.31 | 5645.24    | 9700.45    | 15428.44   | 24839.31   | 0.72 | 17.15  | 27.81  | 40.95  | 63.81   |
| 0.32 | 4760.46    | 8218.89    | 13020.21   | 21327.94   | 0.73 | 14.77  | 23.67  | 35.03  | 53.53   |
| 0.33 | 4022.44    | 6905.96    | 11004.02   | 18011.89   | 0.74 | 12.70  | 20.13  | 29.97  | 45.68   |
| 0.34 | 3451.37    | 5892.65    | 9315.64    | 15246.00   | 0.75 | 10.81  | 17.26  | 25.27  | 38.83   |
| 0.35 | 2936.47    | 5087.17    | 7921.10    | 13109.07   | 0.76 | 9.27   | 14.80  | 21.78  | 33.54   |
| 0.36 | 2496.78    | 4332.27    | 6847.33    | 11034.10   | 0.77 | 7.92   | 12.50  | 18.30  | 27.89   |
| 0.37 | 2147.83    | 3738.00    | 5858.06    | 9720.12    | 0.78 | 6.70   | 10.66  | 15.60  | 23.56   |
| 0.38 | 1851.71    | 3204.20    | 5079.29    | 8279.01    | 0.79 | 5.66   | 8.84   | 12.84  | 19.44   |
| 0.39 | 1578.27    | 2751.85    | 4338.47    | 7061.75    | 0.80 | 4.71   | 7.44   | 10.75  | 16.35   |
| 0.40 | 1372.06    | 2363.10    | 3696.46    | 6204.20    | 0.81 | 3.96   | 6.21   | 8.92   | 13.50   |
| 0.41 | 1182.51    | 2063.58    | 3206.56    | 5308.77    | 0.82 | 3.27   | 5.15   | 7.41   | 11.07   |
| 0.42 | 1028.52    | 1758.64    | 2766.59    | 4601.29    | 0.83 | 2.73   | 4.27   | 6.12   | 9.07    |
| 0.43 | 886.64     | 1515.91    | 2365.64    | 4021.87    | 0.84 | 2.24   | 3.46   | 5.03   | 7.44    |
| 0.44 | 771.59     | 1326.41    | 2082.36    | 3390.58    | 0.85 | 1.85   | 2.83   | 4.05   | 5.98    |
| 0.45 | 672.19     | 1159.56    | 1813.47    | 2954.42    | 0.86 | 1.52   | 2.29   | 3.27   | 4.84    |
| 0.46 | 585.27     | 1007.66    | 1564.14    | 2582.00    | 0.87 | 1.22   | 1.85   | 2.60   | 3.81    |
| 0.47 | 507.08     | 869.64     | 1355.00    | 2262.39    | 0.88 | 1.01   | 1.50   | 2.08   | 2.99    |
| 0.48 | 440.27     | 760.66     | 1172.90    | 1905.10    | 0.89 | 0.84   | 1.18   | 1.63   | 2.33    |
| 0.49 | 383.11     | 653.03     | 1029.49    | 1688.70    | 0.90 | 0.72   | 0.95   | 1.27   | 1.83    |
| 0.50 | 333.51     | 565.70     | 881.19     | 1463.37    |      |        |        |        |         |

Table S380: Critical values for detector  $\hat{H}_{mov,sn}^{m,0.2}$  with windows size  $n = 0.2$ , and FM-OLS and D-OLS estimation in a model with intercept. The number of integrated regressors is 3 and the highest power of  $x_{kt}$  is 1.

| m    | 90 %       | 95 %       | 97,5 %      | 99 %        | m    | 90 %    | 95 %    | 97,5 %  | 99 %    |
|------|------------|------------|-------------|-------------|------|---------|---------|---------|---------|
| 0.10 | 5348896.40 | 9146616.08 | 14282190.61 | 23511507.51 | 0.51 | 1289.51 | 2171.26 | 3399.70 | 5507.77 |
| 0.11 | 3520728.29 | 6041390.98 | 9456791.13  | 15745856.40 | 0.52 | 1128.57 | 1899.35 | 2932.05 | 4733.13 |
| 0.12 | 2397664.66 | 4139624.33 | 6403127.33  | 10703444.85 | 0.53 | 984.28  | 1649.17 | 2553.33 | 4108.00 |
| 0.13 | 1681668.11 | 2871183.12 | 4494364.04  | 7353799.96  | 0.54 | 865.89  | 1439.61 | 2207.34 | 3579.80 |
| 0.14 | 1195786.02 | 2064746.01 | 3285105.16  | 5392878.87  | 0.55 | 760.01  | 1258.32 | 1932.55 | 3119.22 |
| 0.15 | 878045.28  | 1501231.18 | 2395626.86  | 3991907.79  | 0.56 | 666.99  | 1113.16 | 1678.93 | 2726.09 |
| 0.16 | 652770.68  | 1113707.16 | 1777492.12  | 2972446.52  | 0.57 | 585.30  | 972.65  | 1462.21 | 2375.46 |
| 0.17 | 490108.05  | 849753.54  | 1319199.30  | 2226762.19  | 0.58 | 513.51  | 845.99  | 1281.06 | 2031.36 |
| 0.18 | 374504.23  | 648168.64  | 1018373.01  | 1730696.77  | 0.59 | 448.34  | 740.24  | 1120.88 | 1750.19 |
| 0.19 | 292607.20  | 499124.59  | 792036.57   | 1309195.17  | 0.60 | 390.34  | 648.35  | 972.75  | 1511.01 |
| 0.20 | 226126.17  | 386067.11  | 610985.53   | 1019020.19  | 0.61 | 342.49  | 568.64  | 844.42  | 1332.69 |
| 0.21 | 180659.09  | 309832.21  | 476534.83   | 782963.27   | 0.62 | 299.30  | 495.77  | 734.66  | 1154.45 |
| 0.22 | 143058.72  | 246749.53  | 384002.97   | 627928.37   | 0.63 | 263.31  | 430.67  | 647.06  | 1010.70 |
| 0.23 | 114916.66  | 198533.14  | 311353.73   | 502539.39   | 0.64 | 230.64  | 374.37  | 566.69  | 880.14  |
| 0.24 | 93778.46   | 159182.16  | 250106.99   | 417043.61   | 0.65 | 200.02  | 325.35  | 490.36  | 768.11  |
| 0.25 | 76590.46   | 129934.29  | 202919.59   | 339134.56   | 0.66 | 174.36  | 283.30  | 425.70  | 664.04  |
| 0.26 | 62857.02   | 106776.35  | 167181.15   | 278212.92   | 0.67 | 152.33  | 244.77  | 366.24  | 572.83  |
| 0.27 | 51801.63   | 88205.97   | 138601.17   | 228936.30   | 0.68 | 132.51  | 213.94  | 315.60  | 493.21  |
| 0.28 | 43018.78   | 73366.68   | 113777.23   | 192079.38   | 0.69 | 114.96  | 183.66  | 270.79  | 429.61  |
| 0.29 | 35912.91   | 61731.52   | 94760.58    | 157502.91   | 0.70 | 100.02  | 159.65  | 234.58  | 368.27  |
| 0.30 | 30066.84   | 51431.83   | 78581.77    | 131152.12   | 0.71 | 86.86   | 137.42  | 203.36  | 318.07  |
| 0.31 | 25309.28   | 43245.46   | 66807.35    | 110339.99   | 0.72 | 75.53   | 118.64  | 173.00  | 271.69  |
| 0.32 | 21375.90   | 36619.71   | 56521.14    | 93199.19    | 0.73 | 65.15   | 102.14  | 149.11  | 231.52  |
| 0.33 | 18143.31   | 31056.09   | 47617.65    | 77478.99    | 0.74 | 56.31   | 88.35   | 127.92  | 194.39  |
| 0.34 | 15389.26   | 26095.50   | 40548.93    | 66483.99    | 0.75 | 48.11   | 75.33   | 109.00  | 162.90  |
| 0.35 | 13159.00   | 22248.50   | 34678.99    | 55690.62    | 0.76 | 41.14   | 63.75   | 92.44   | 137.63  |
| 0.36 | 11175.16   | 19039.43   | 29594.61    | 47620.74    | 0.77 | 35.11   | 54.14   | 78.08   | 116.26  |
| 0.37 | 9635.50    | 16306.57   | 25231.43    | 41068.14    | 0.78 | 29.84   | 45.82   | 66.13   | 98.13   |
| 0.38 | 8317.42    | 14115.63   | 21510.81    | 35538.11    | 0.79 | 25.31   | 38.62   | 55.38   | 82.42   |
| 0.39 | 7085.16    | 12130.65   | 18690.09    | 30341.73    | 0.80 | 21.30   | 32.53   | 46.46   | 68.40   |
| 0.40 | 6122.73    | 10356.38   | 16082.47    | 25984.73    | 0.81 | 17.93   | 27.10   | 38.46   | 56.48   |
| 0.41 | 5230.84    | 9012.41    | 13808.30    | 22645.42    | 0.82 | 14.99   | 22.63   | 31.91   | 46.87   |
| 0.42 | 4551.28    | 7750.76    | 11966.59    | 19355.42    | 0.83 | 12.61   | 18.66   | 26.16   | 37.94   |
| 0.43 | 3934.08    | 6706.89    | 10395.98    | 16452.74    | 0.84 | 10.46   | 15.50   | 21.56   | 31.20   |
| 0.44 | 3418.17    | 5847.47    | 8983.90     | 14526.01    | 0.85 | 8.60    | 12.80   | 17.68   | 25.42   |
| 0.45 | 2984.99    | 5091.99    | 7798.59     | 12554.43    | 0.86 | 7.06    | 10.49   | 14.39   | 20.19   |
| 0.46 | 2603.42    | 4384.99    | 6801.88     | 11108.96    | 0.87 | 5.75    | 8.46    | 11.53   | 16.04   |
| 0.47 | 2250.85    | 3799.78    | 5896.55     | 9731.70     | 0.88 | 4.68    | 6.77    | 9.16    | 12.77   |
| 0.48 | 1952.12    | 3315.10    | 5138.68     | 8437.87     | 0.89 | 3.76    | 5.40    | 7.29    | 10.01   |
| 0.49 | 1704.20    | 2876.45    | 4472.74     | 7281.15     | 0.90 | 3.00    | 4.29    | 5.72    | 7.82    |
| 0.50 | 1476.45    | 2507.25    | 3910.44     | 6333.57     |      |         |         |         |         |

Table S381: Critical values for detector  $\hat{H}_{mov,sn}^{m,0.2}$  with windows size  $n = 0.2$ , and IM-OLS estimation in a model with intercept. The number of integrated regressors is 3 and the highest power of  $x_{kt}$  is 1.

| m    | 90 %       | 95 %       | 97,5 %     | 99 %       | m    | 90 %   | 95 %   | 97,5 % | 99 %    |
|------|------------|------------|------------|------------|------|--------|--------|--------|---------|
| 0.10 | 1417134.33 | 2486742.01 | 3957924.10 | 6577223.95 | 0.51 | 331.42 | 556.03 | 875.78 | 1427.19 |
| 0.11 | 936692.46  | 1632172.93 | 2582050.64 | 4359348.28 | 0.52 | 288.86 | 488.60 | 758.22 | 1244.78 |
| 0.12 | 638535.21  | 1110735.66 | 1778388.99 | 2954428.33 | 0.53 | 251.66 | 428.11 | 661.09 | 1091.52 |
| 0.13 | 447169.61  | 785647.16  | 1236595.10 | 2067025.25 | 0.54 | 220.69 | 374.70 | 572.66 | 936.61  |
| 0.14 | 321783.96  | 560122.93  | 888451.48  | 1478829.36 | 0.55 | 192.89 | 324.66 | 502.26 | 809.62  |
| 0.15 | 234630.29  | 414158.88  | 664263.31  | 1105406.93 | 0.56 | 169.19 | 285.76 | 433.12 | 693.53  |
| 0.16 | 174617.16  | 307098.82  | 491907.30  | 840732.49  | 0.57 | 147.66 | 249.87 | 378.63 | 598.32  |
| 0.17 | 131134.88  | 233673.59  | 369960.39  | 625268.27  | 0.58 | 129.22 | 214.95 | 330.79 | 516.17  |
| 0.18 | 100599.90  | 177854.13  | 285167.13  | 479424.03  | 0.59 | 112.16 | 188.66 | 289.95 | 452.55  |
| 0.19 | 78198.61   | 137315.53  | 220126.07  | 364768.26  | 0.60 | 98.32  | 163.13 | 248.61 | 397.43  |
| 0.20 | 61434.48   | 106724.65  | 171247.41  | 285040.25  | 0.61 | 85.44  | 142.96 | 215.90 | 338.02  |
| 0.21 | 48691.63   | 84943.40   | 135940.76  | 227293.93  | 0.62 | 75.07  | 123.37 | 186.71 | 296.08  |
| 0.22 | 38622.61   | 67342.96   | 109826.37  | 181891.37  | 0.63 | 65.36  | 107.10 | 162.74 | 255.31  |
| 0.23 | 31256.76   | 54359.90   | 87140.99   | 145667.84  | 0.64 | 56.80  | 92.67  | 139.34 | 216.19  |
| 0.24 | 25490.60   | 44246.94   | 70773.75   | 118080.66  | 0.65 | 48.60  | 80.44  | 120.69 | 191.89  |
| 0.25 | 20666.55   | 36072.91   | 56867.39   | 94883.09   | 0.66 | 41.98  | 69.03  | 103.65 | 164.43  |
| 0.26 | 16945.22   | 29919.01   | 46658.80   | 78951.59   | 0.67 | 36.72  | 59.68  | 88.93  | 142.89  |
| 0.27 | 13983.82   | 24572.82   | 39146.58   | 65552.60   | 0.68 | 31.68  | 51.46  | 77.95  | 120.75  |
| 0.28 | 11579.78   | 20342.00   | 32219.58   | 53225.56   | 0.69 | 27.32  | 44.49  | 66.78  | 106.66  |
| 0.29 | 9579.93    | 16894.74   | 26497.31   | 43625.85   | 0.70 | 23.53  | 38.28  | 57.89  | 90.91   |
| 0.30 | 8027.26    | 13921.24   | 22030.35   | 36454.42   | 0.71 | 20.34  | 32.93  | 49.56  | 77.23   |
| 0.31 | 6751.29    | 11679.41   | 18575.40   | 29853.77   | 0.72 | 17.57  | 28.37  | 41.80  | 65.06   |
| 0.32 | 5683.25    | 9856.31    | 15669.34   | 25571.81   | 0.73 | 15.08  | 24.09  | 35.60  | 54.40   |
| 0.33 | 4797.38    | 8264.01    | 13117.63   | 21451.23   | 0.74 | 12.93  | 20.45  | 30.27  | 46.17   |
| 0.34 | 4108.12    | 7054.08    | 11095.26   | 18130.33   | 0.75 | 10.95  | 17.49  | 25.51  | 39.07   |
| 0.35 | 3492.94    | 6063.65    | 9436.14    | 15774.51   | 0.76 | 9.38   | 14.93  | 21.93  | 33.76   |
| 0.36 | 2962.81    | 5122.59    | 8160.80    | 13181.14   | 0.77 | 8.00   | 12.61  | 18.40  | 28.06   |
| 0.37 | 2540.40    | 4423.41    | 6914.83    | 11443.73   | 0.78 | 6.79   | 10.74  | 15.67  | 23.67   |
| 0.38 | 2183.15    | 3801.06    | 5991.80    | 9728.91    | 0.79 | 5.75   | 8.92   | 12.96  | 19.50   |
| 0.39 | 1861.08    | 3247.01    | 5120.82    | 8396.70    | 0.80 | 4.81   | 7.54   | 10.84  | 16.41   |
| 0.40 | 1607.85    | 2790.02    | 4358.83    | 7271.86    | 0.81 | 4.06   | 6.32   | 9.04   | 13.61   |
| 0.41 | 1388.23    | 2423.15    | 3769.26    | 6236.34    | 0.82 | 3.38   | 5.26   | 7.53   | 11.20   |
| 0.42 | 1202.97    | 2052.88    | 3241.08    | 5357.08    | 0.83 | 2.85   | 4.39   | 6.24   | 9.19    |
| 0.43 | 1035.23    | 1771.73    | 2769.24    | 4667.59    | 0.84 | 2.36   | 3.59   | 5.16   | 7.57    |
| 0.44 | 895.14     | 1540.45    | 2421.07    | 3952.10    | 0.85 | 1.97   | 2.96   | 4.18   | 6.10    |
| 0.45 | 776.30     | 1342.34    | 2104.87    | 3445.95    | 0.86 | 1.65   | 2.41   | 3.38   | 4.97    |
| 0.46 | 676.20     | 1165.75    | 1808.89    | 2975.41    | 0.87 | 1.35   | 1.98   | 2.73   | 3.93    |
| 0.47 | 584.11     | 1001.83    | 1546.62    | 2590.97    | 0.88 | 1.16   | 1.62   | 2.20   | 3.10    |
| 0.48 | 505.98     | 874.52     | 1346.61    | 2165.48    | 0.89 | 1.02   | 1.31   | 1.76   | 2.47    |
| 0.49 | 438.49     | 744.12     | 1172.91    | 1913.16    | 0.90 | 0.91   | 1.09   | 1.40   | 1.95    |
| 0.50 | 379.31     | 646.16     | 1006.01    | 1657.46    |      |        |        |        |         |

Table S382: Critical values for detector  $\hat{H}_{mov,sn}^{m,0.3}$  with windows size  $n = 0.3$ , and FM-OLS and D-OLS estimation in a model with intercept. The number of integrated regressors is 3 and the highest power of  $x_{kt}$  is 1.

| m    | 90 %       | 95 %        | 97,5 %      | 99 %        | m    | 90 %    | 95 %    | 97,5 %  | 99 %    |
|------|------------|-------------|-------------|-------------|------|---------|---------|---------|---------|
| 0.10 | 6512289.76 | 11250170.46 | 17693015.47 | 29232507.37 | 0.51 | 1465.08 | 2467.14 | 3837.84 | 6159.97 |
| 0.11 | 4289831.17 | 7424313.50  | 11665264.98 | 19460370.09 | 0.52 | 1277.51 | 2145.50 | 3307.12 | 5316.09 |
| 0.12 | 2926325.42 | 5078746.25  | 7901688.31  | 13177478.72 | 0.53 | 1106.33 | 1851.26 | 2853.07 | 4613.01 |
| 0.13 | 2046121.62 | 3529024.13  | 5549467.16  | 9089369.91  | 0.54 | 971.20  | 1614.23 | 2476.92 | 3983.26 |
| 0.14 | 1458318.87 | 2530388.66  | 4033844.40  | 6653638.79  | 0.55 | 849.37  | 1409.81 | 2155.23 | 3460.75 |
| 0.15 | 1069814.20 | 1847566.39  | 2944153.24  | 4931236.97  | 0.56 | 742.70  | 1236.37 | 1862.09 | 3001.81 |
| 0.16 | 796308.63  | 1367712.60  | 2196213.28  | 3684017.70  | 0.57 | 651.38  | 1078.94 | 1611.68 | 2614.05 |
| 0.17 | 598378.24  | 1038736.53  | 1626116.85  | 2753008.69  | 0.58 | 567.20  | 934.40  | 1409.96 | 2220.46 |
| 0.18 | 456625.92  | 794846.95   | 1253284.95  | 2149664.54  | 0.59 | 494.31  | 810.92  | 1224.41 | 1912.36 |
| 0.19 | 356916.02  | 611122.33   | 964667.36   | 1608528.09  | 0.60 | 427.41  | 707.93  | 1061.20 | 1648.42 |
| 0.20 | 276345.40  | 471870.33   | 747660.65   | 1249562.86  | 0.61 | 373.10  | 617.07  | 915.20  | 1434.33 |
| 0.21 | 219462.93  | 377987.28   | 583824.40   | 960337.70   | 0.62 | 324.58  | 535.77  | 789.99  | 1238.02 |
| 0.22 | 173469.61  | 300491.80   | 469594.91   | 770690.24   | 0.63 | 285.09  | 465.26  | 689.33  | 1081.43 |
| 0.23 | 139642.59  | 242572.94   | 380063.10   | 612700.60   | 0.64 | 247.89  | 400.46  | 599.61  | 934.15  |
| 0.24 | 113497.48  | 194055.22   | 305631.39   | 508436.70   | 0.65 | 214.20  | 345.78  | 520.19  | 808.56  |
| 0.25 | 92528.69   | 157792.09   | 247011.52   | 414020.62   | 0.66 | 185.73  | 300.10  | 448.36  | 696.46  |
| 0.26 | 75946.48   | 129796.54   | 202613.00   | 338342.59   | 0.67 | 161.64  | 258.53  | 384.40  | 599.89  |
| 0.27 | 62507.61   | 107022.51   | 167700.71   | 277754.80   | 0.68 | 139.48  | 223.84  | 328.85  | 516.53  |
| 0.28 | 51854.88   | 88706.72    | 138371.82   | 231334.98   | 0.69 | 120.28  | 191.75  | 280.91  | 443.43  |
| 0.29 | 43257.65   | 74295.23    | 114640.60   | 190535.60   | 0.70 | 104.17  | 165.57  | 242.06  | 379.65  |
| 0.30 | 36186.74   | 61815.29    | 94827.54    | 158196.47   | 0.71 | 89.99   | 141.89  | 208.71  | 326.20  |
| 0.31 | 30367.92   | 51807.00    | 80591.04    | 132321.10   | 0.72 | 77.78   | 121.71  | 177.26  | 276.94  |
| 0.32 | 25633.20   | 43861.16    | 68012.15    | 112283.66   | 0.73 | 66.91   | 104.56  | 151.79  | 234.76  |
| 0.33 | 21709.92   | 37105.22    | 57097.68    | 93575.97    | 0.74 | 57.49   | 89.79   | 129.91  | 197.01  |
| 0.34 | 18364.62   | 31114.19    | 48332.99    | 79266.98    | 0.75 | 48.96   | 76.29   | 110.18  | 164.35  |
| 0.35 | 15651.23   | 26578.84    | 41242.13    | 66532.02    | 0.76 | 41.78   | 64.42   | 93.30   | 138.82  |
| 0.36 | 13244.55   | 22637.46    | 35144.71    | 56795.48    | 0.77 | 35.48   | 54.52   | 78.43   | 116.85  |
| 0.37 | 11437.83   | 19288.44    | 29863.91    | 48539.75    | 0.78 | 30.04   | 46.15   | 66.49   | 98.52   |
| 0.38 | 9805.82    | 16707.31    | 25368.52    | 42049.31    | 0.79 | 25.46   | 38.80   | 55.58   | 82.60   |
| 0.39 | 8359.37    | 14314.92    | 21965.82    | 35845.94    | 0.80 | 21.43   | 32.67   | 46.58   | 68.51   |
| 0.40 | 7195.27    | 12202.76    | 18885.30    | 30561.75    | 0.81 | 18.05   | 27.22   | 38.54   | 56.61   |
| 0.41 | 6144.39    | 10582.81    | 16175.03    | 26535.24    | 0.82 | 15.11   | 22.74   | 32.04   | 47.01   |
| 0.42 | 5322.27    | 9065.54     | 14002.19    | 22549.10    | 0.83 | 12.73   | 18.76   | 26.27   | 38.04   |
| 0.43 | 4591.88    | 7831.92     | 12106.58    | 19123.38    | 0.84 | 10.56   | 15.61   | 21.68   | 31.32   |
| 0.44 | 3980.97    | 6794.76     | 10438.07    | 16794.20    | 0.85 | 8.72    | 12.93   | 17.77   | 25.57   |
| 0.45 | 3464.19    | 5903.38     | 9007.50     | 14526.01    | 0.86 | 7.18    | 10.60   | 14.51   | 20.30   |
| 0.46 | 3002.24    | 5071.77     | 7862.57     | 12724.08    | 0.87 | 5.87    | 8.56    | 11.63   | 16.16   |
| 0.47 | 2591.02    | 4385.61     | 6758.26     | 11126.63    | 0.88 | 4.79    | 6.89    | 9.29    | 12.86   |
| 0.48 | 2239.41    | 3805.46     | 5848.85     | 9658.78     | 0.89 | 3.87    | 5.52    | 7.39    | 10.12   |
| 0.49 | 1946.83    | 3285.92     | 5100.45     | 8261.91     | 0.90 | 3.12    | 4.40    | 5.84    | 7.93    |
| 0.50 | 1689.88    | 2855.67     | 4436.73     | 7161.10     |      |         |         |         |         |

Table S383: Critical values for detector  $\hat{H}_{mov,sn}^{m,0.3}$  with windows size  $n = 0.3$ , and IM-OLS estimation in a model with intercept. The number of integrated regressors is 3 and the highest power of  $x_{kt}$  is 1.



| m    | 90 %        | 95 %        | 97,5 %      | 99 %        | m    | 90 %   | 95 %    | 97,5 %  | 99 %    |
|------|-------------|-------------|-------------|-------------|------|--------|---------|---------|---------|
| 0.10 | 17074759.61 | 27743671.65 | 41525292.28 | 63969857.13 | 0.51 | 763.71 | 1254.65 | 1871.09 | 2914.68 |
| 0.11 | 10046758.81 | 16317809.87 | 24247437.70 | 37923614.42 | 0.52 | 649.28 | 1062.40 | 1609.25 | 2537.93 |
| 0.12 | 6182341.51  | 10034107.20 | 15099513.74 | 23537863.69 | 0.53 | 560.86 | 919.32  | 1379.73 | 2174.22 |
| 0.13 | 3926564.96  | 6342020.04  | 9651644.87  | 15068358.08 | 0.54 | 484.62 | 792.33  | 1195.08 | 1880.32 |
| 0.14 | 2602545.83  | 4208864.44  | 6316722.62  | 10149516.98 | 0.55 | 422.35 | 684.94  | 1024.63 | 1609.20 |
| 0.15 | 1765733.40  | 2880791.55  | 4304839.88  | 6801163.06  | 0.56 | 363.74 | 586.48  | 877.99  | 1376.21 |
| 0.16 | 1222650.94  | 2025334.63  | 3017350.74  | 4789650.89  | 0.57 | 314.15 | 507.81  | 754.51  | 1180.58 |
| 0.17 | 866303.35   | 1417673.32  | 2159988.55  | 3359677.04  | 0.58 | 270.56 | 439.83  | 654.42  | 1005.72 |
| 0.18 | 624469.41   | 1025119.89  | 1514044.00  | 2387697.92  | 0.59 | 235.66 | 380.38  | 570.98  | 873.07  |
| 0.19 | 453090.94   | 736194.24   | 1111523.49  | 1743686.02  | 0.60 | 203.59 | 327.55  | 487.85  | 753.10  |
| 0.20 | 333180.58   | 551303.31   | 828762.64   | 1313210.17  | 0.61 | 175.78 | 284.06  | 421.31  | 669.30  |
| 0.21 | 250133.68   | 410106.86   | 622406.29   | 962674.78   | 0.62 | 152.26 | 244.52  | 362.03  | 569.20  |
| 0.22 | 190459.85   | 312066.47   | 469207.10   | 739443.37   | 0.63 | 131.79 | 211.74  | 311.53  | 480.38  |
| 0.23 | 147019.09   | 239328.46   | 359512.94   | 566941.50   | 0.64 | 112.52 | 181.67  | 269.70  | 412.83  |
| 0.24 | 112941.84   | 184546.60   | 278064.19   | 442665.96   | 0.65 | 96.98  | 156.22  | 230.72  | 347.11  |
| 0.25 | 87998.15    | 145016.28   | 219252.79   | 347811.58   | 0.66 | 84.21  | 134.37  | 196.50  | 300.50  |
| 0.26 | 69395.94    | 114200.23   | 170690.71   | 273881.32   | 0.67 | 72.23  | 115.76  | 170.91  | 256.83  |
| 0.27 | 55658.25    | 89937.52    | 135384.00   | 217422.88   | 0.68 | 62.25  | 99.40   | 145.15  | 218.75  |
| 0.28 | 44331.77    | 72456.11    | 109436.26   | 176048.04   | 0.69 | 53.18  | 84.58   | 124.28  | 189.90  |
| 0.29 | 35597.59    | 58200.57    | 88955.04    | 139487.10   | 0.70 | 45.97  | 73.15   | 106.23  | 161.23  |
| 0.30 | 28618.51    | 47129.99    | 71571.54    | 111827.60   | 0.71 | 39.04  | 62.74   | 92.16   | 138.65  |
| 0.31 | 23249.24    | 38241.85    | 57240.64    | 91265.90    | 0.72 | 33.58  | 52.86   | 78.71   | 119.55  |
| 0.32 | 19127.71    | 31015.38    | 47165.87    | 73677.37    | 0.73 | 28.55  | 45.44   | 66.62   | 101.52  |
| 0.33 | 15584.36    | 25653.04    | 38515.00    | 61178.99    | 0.74 | 24.27  | 38.36   | 55.98   | 85.58   |
| 0.34 | 12916.57    | 21185.35    | 31860.88    | 50545.14    | 0.75 | 20.65  | 32.64   | 47.70   | 72.31   |
| 0.35 | 10702.56    | 17726.99    | 26859.20    | 41983.54    | 0.76 | 17.66  | 27.86   | 40.51   | 60.54   |
| 0.36 | 8981.87     | 14682.77    | 22225.69    | 34750.82    | 0.77 | 15.00  | 23.53   | 33.66   | 50.30   |
| 0.37 | 7491.53     | 12397.60    | 18430.21    | 28961.91    | 0.78 | 12.68  | 19.84   | 28.70   | 42.39   |
| 0.38 | 6208.35     | 10179.74    | 15374.78    | 24199.64    | 0.79 | 10.57  | 16.49   | 23.70   | 35.50   |
| 0.39 | 5238.65     | 8649.90     | 12922.10    | 20338.00    | 0.80 | 8.82   | 13.84   | 19.99   | 29.69   |
| 0.40 | 4413.81     | 7197.59     | 10927.24    | 17022.44    | 0.81 | 7.36   | 11.40   | 16.42   | 25.02   |
| 0.41 | 3733.55     | 6131.97     | 9202.16     | 14392.79    | 0.82 | 6.11   | 9.52    | 13.70   | 20.16   |
| 0.42 | 3168.41     | 5167.92     | 7825.50     | 12356.12    | 0.83 | 5.08   | 7.91    | 11.18   | 16.29   |
| 0.43 | 2652.34     | 4395.25     | 6572.68     | 10462.71    | 0.84 | 4.11   | 6.46    | 9.10    | 13.41   |
| 0.44 | 2247.63     | 3706.16     | 5596.29     | 8893.08     | 0.85 | 3.35   | 5.11    | 7.29    | 10.70   |
| 0.45 | 1931.54     | 3143.84     | 4764.26     | 7614.39     | 0.86 | 2.67   | 4.10    | 5.74    | 8.46    |
| 0.46 | 1656.84     | 2720.05     | 4146.29     | 6542.09     | 0.87 | 2.12   | 3.23    | 4.52    | 6.61    |
| 0.47 | 1410.93     | 2328.20     | 3502.12     | 5532.53     | 0.88 | 1.65   | 2.51    | 3.54    | 5.15    |
| 0.48 | 1212.79     | 1981.54     | 2999.22     | 4763.30     | 0.89 | 1.28   | 1.92    | 2.66    | 3.86    |
| 0.49 | 1026.61     | 1699.08     | 2542.61     | 3962.95     | 0.90 | 0.96   | 1.43    | 1.99    | 2.92    |
| 0.50 | 886.87      | 1456.20     | 2179.14     | 3408.72     |      |        |         |         |         |

Table S384: Critical values for detector  $\hat{H}_{mov,sn}^{m,0.1}$  with windows size  $n = 0.1$ , and FM-OLS and D-OLS estimation in a model with intercept and linear trend. The number of integrated regressors is 3 and the highest power of  $x_{kt}$  is 1.

| m    | 90 %        | 95 %         | 97,5 %       | 99 %         | m    | 90 %    | 95 %    | 97,5 %  | 99 %     |
|------|-------------|--------------|--------------|--------------|------|---------|---------|---------|----------|
| 0.10 | 63121154.79 | 104163018.10 | 155683244.84 | 242221048.05 | 0.51 | 2723.05 | 4471.97 | 6672.20 | 10405.28 |
| 0.11 | 37314263.75 | 60122756.59  | 90808670.73  | 145846513.17 | 0.52 | 2342.69 | 3852.45 | 5744.98 | 8987.31  |
| 0.12 | 22592247.55 | 36781121.20  | 54764738.32  | 86346219.19  | 0.53 | 2022.01 | 3302.31 | 4944.15 | 7645.33  |
| 0.13 | 14435965.77 | 23385385.10  | 34966735.02  | 55241997.40  | 0.54 | 1740.22 | 2859.69 | 4266.45 | 6632.25  |
| 0.14 | 9490584.68  | 15395318.31  | 23187862.02  | 36419987.26  | 0.55 | 1498.08 | 2463.05 | 3693.89 | 5693.64  |
| 0.15 | 6415598.36  | 10570721.96  | 15953682.73  | 24886196.17  | 0.56 | 1301.59 | 2121.89 | 3180.55 | 4892.45  |
| 0.16 | 4458821.16  | 7249780.00   | 10895691.52  | 17024470.47  | 0.57 | 1127.61 | 1813.83 | 2724.27 | 4234.48  |
| 0.17 | 3154019.71  | 5155970.81   | 7657292.65   | 12056528.35  | 0.58 | 973.63  | 1560.93 | 2334.97 | 3655.18  |
| 0.18 | 2244843.55  | 3691531.16   | 5490458.82   | 8586801.22   | 0.59 | 839.86  | 1352.75 | 2017.53 | 3150.16  |
| 0.19 | 1624737.85  | 2656455.27   | 4003768.19   | 6267949.29   | 0.60 | 726.68  | 1172.25 | 1747.00 | 2707.45  |
| 0.20 | 1199270.76  | 1945800.19   | 2929193.05   | 4639311.90   | 0.61 | 627.74  | 1015.98 | 1497.30 | 2348.34  |
| 0.21 | 898265.77   | 1449798.15   | 2191102.39   | 3436428.84   | 0.62 | 544.15  | 880.84  | 1298.13 | 2025.90  |
| 0.22 | 678154.05   | 1112549.85   | 1654702.82   | 2622164.15   | 0.63 | 469.97  | 756.91  | 1123.20 | 1739.69  |
| 0.23 | 520355.27   | 855715.12    | 1294882.83   | 2036832.05   | 0.64 | 404.16  | 656.53  | 979.37  | 1502.93  |
| 0.24 | 404119.47   | 660585.85    | 999510.20    | 1573369.83   | 0.65 | 347.46  | 561.85  | 834.84  | 1298.90  |
| 0.25 | 315097.32   | 520551.03    | 776958.20    | 1231523.44   | 0.66 | 296.24  | 482.91  | 718.06  | 1104.89  |
| 0.26 | 249694.13   | 409069.94    | 615142.13    | 957220.58    | 0.67 | 256.34  | 417.02  | 616.48  | 940.83   |
| 0.27 | 196966.68   | 324443.12    | 486759.66    | 748006.53    | 0.68 | 221.38  | 357.98  | 525.37  | 806.82   |
| 0.28 | 158144.93   | 259534.41    | 396464.91    | 616776.25    | 0.69 | 189.93  | 303.70  | 446.51  | 679.84   |
| 0.29 | 127613.11   | 209743.63    | 318948.46    | 498098.74    | 0.70 | 163.71  | 260.05  | 381.27  | 586.89   |
| 0.30 | 103633.38   | 170015.45    | 256426.75    | 411761.35    | 0.71 | 140.51  | 222.41  | 324.61  | 496.75   |
| 0.31 | 84919.06    | 139206.99    | 208352.76    | 330397.82    | 0.72 | 120.72  | 190.66  | 276.11  | 423.82   |
| 0.32 | 69225.83    | 112915.38    | 169773.75    | 269052.54    | 0.73 | 103.51  | 162.76  | 236.32  | 360.27   |
| 0.33 | 56707.68    | 92937.03     | 139565.83    | 219169.71    | 0.74 | 88.69   | 138.13  | 200.73  | 302.77   |
| 0.34 | 46595.10    | 76023.30     | 114581.22    | 180344.87    | 0.75 | 75.40   | 118.06  | 169.44  | 253.57   |
| 0.35 | 38499.23    | 63351.60     | 94899.61     | 149759.16    | 0.76 | 64.05   | 99.98   | 143.14  | 212.16   |
| 0.36 | 32173.45    | 52747.33     | 79145.21     | 123707.51    | 0.77 | 54.31   | 84.35   | 120.80  | 177.55   |
| 0.37 | 26747.60    | 43962.17     | 66432.44     | 103820.37    | 0.78 | 45.77   | 71.07   | 101.56  | 149.89   |
| 0.38 | 22495.79    | 36840.72     | 55596.52     | 86469.98     | 0.79 | 38.64   | 59.59   | 84.54   | 125.76   |
| 0.39 | 18827.41    | 30968.17     | 46745.09     | 73255.82     | 0.80 | 32.25   | 49.43   | 70.42   | 102.83   |
| 0.40 | 15916.35    | 26018.16     | 39504.00     | 61415.61     | 0.81 | 26.70   | 41.35   | 58.28   | 85.72    |
| 0.41 | 13511.08    | 22054.80     | 33415.76     | 52000.87     | 0.82 | 22.26   | 34.06   | 48.49   | 71.10    |
| 0.42 | 11488.29    | 18729.55     | 28065.50     | 43950.75     | 0.83 | 18.47   | 28.13   | 39.73   | 58.09    |
| 0.43 | 9718.54     | 15951.58     | 23806.65     | 37097.47     | 0.84 | 15.26   | 23.05   | 32.44   | 47.18    |
| 0.44 | 8179.00     | 13578.68     | 20110.78     | 31814.04     | 0.85 | 12.49   | 18.82   | 26.28   | 38.40    |
| 0.45 | 6962.68     | 11477.66     | 17270.41     | 27193.62     | 0.86 | 10.19   | 15.17   | 21.05   | 30.24    |
| 0.46 | 5953.14     | 9773.99      | 14864.05     | 23400.65     | 0.87 | 8.20    | 12.15   | 16.65   | 23.85    |
| 0.47 | 5085.72     | 8373.56      | 12662.44     | 20074.83     | 0.88 | 6.52    | 9.60    | 13.12   | 18.42    |
| 0.48 | 4354.54     | 7160.52      | 10812.99     | 16985.34     | 0.89 | 5.13    | 7.51    | 10.30   | 14.30    |
| 0.49 | 3726.42     | 6097.07      | 9180.11      | 14433.25     | 0.90 | 3.99    | 5.82    | 7.88    | 10.95    |
| 0.50 | 3187.61     | 5216.13      | 7762.30      | 12059.91     |      |         |         |         |          |

Table S385: Critical values for detector  $\hat{H}_{mov,sn}^{m,0.1}$  with windows size  $n = 0.1$ , and IM-OLS estimation in a model with intercept and linear trend. The number of integrated regressors is 3 and the highest power of  $x_{kt}$  is 1.

| m    | 90 %        | 95 %        | 97,5 %      | 99 %        | m    | 90 %    | 95 %    | 97,5 %  | 99 %    |
|------|-------------|-------------|-------------|-------------|------|---------|---------|---------|---------|
| 0.10 | 23645023.77 | 38652657.33 | 58425370.25 | 90238916.53 | 0.51 | 1100.82 | 1811.56 | 2699.53 | 4197.55 |
| 0.11 | 14075763.93 | 22858747.69 | 34527315.96 | 53987443.79 | 0.52 | 931.28  | 1529.46 | 2310.36 | 3651.17 |
| 0.12 | 8766816.31  | 14308590.72 | 21581085.09 | 33860281.83 | 0.53 | 799.57  | 1317.01 | 1978.07 | 3116.19 |
| 0.13 | 5588114.12  | 9125958.06  | 13925978.64 | 22023415.39 | 0.54 | 687.53  | 1122.53 | 1703.38 | 2668.62 |
| 0.14 | 3737353.14  | 6091078.42  | 9236288.38  | 14867798.68 | 0.55 | 598.18  | 971.97  | 1450.80 | 2278.05 |
| 0.15 | 2560549.40  | 4219349.20  | 6346621.71  | 10044642.41 | 0.56 | 512.32  | 825.73  | 1233.29 | 1919.74 |
| 0.16 | 1787534.14  | 2969155.15  | 4473696.80  | 7160562.28  | 0.57 | 440.36  | 713.56  | 1057.24 | 1643.01 |
| 0.17 | 1272017.28  | 2102237.84  | 3217860.26  | 5090889.45  | 0.58 | 377.29  | 611.84  | 911.19  | 1400.10 |
| 0.18 | 920339.72   | 1524320.35  | 2270813.66  | 3594886.89  | 0.59 | 327.57  | 526.15  | 792.02  | 1216.86 |
| 0.19 | 671101.83   | 1101257.85  | 1678259.19  | 2648711.16  | 0.60 | 279.73  | 452.86  | 670.95  | 1038.45 |
| 0.20 | 497099.30   | 826300.66   | 1250162.68  | 1985802.29  | 0.61 | 240.84  | 388.33  | 578.51  | 911.57  |
| 0.21 | 372694.35   | 617153.08   | 944033.77   | 1471000.59  | 0.62 | 207.45  | 333.31  | 491.73  | 768.98  |
| 0.22 | 284666.54   | 470346.70   | 711746.42   | 1126455.80  | 0.63 | 178.02  | 286.28  | 421.33  | 643.19  |
| 0.23 | 220465.67   | 360872.58   | 547335.73   | 866084.06   | 0.64 | 151.39  | 243.39  | 359.59  | 552.41  |
| 0.24 | 168737.98   | 279854.11   | 425154.30   | 675723.72   | 0.65 | 129.34  | 208.70  | 305.64  | 461.42  |
| 0.25 | 132388.90   | 219287.39   | 335165.08   | 531526.36   | 0.66 | 111.16  | 176.80  | 258.66  | 393.63  |
| 0.26 | 104458.64   | 173078.29   | 260694.09   | 418044.79   | 0.67 | 95.06   | 152.05  | 222.49  | 335.79  |
| 0.27 | 83498.87    | 136121.98   | 206380.57   | 330904.76   | 0.68 | 81.11   | 129.14  | 187.82  | 280.39  |
| 0.28 | 66726.85    | 109741.05   | 166760.70   | 271006.08   | 0.69 | 68.58   | 109.12  | 159.54  | 242.45  |
| 0.29 | 53397.06    | 88281.02    | 136114.84   | 212495.92   | 0.70 | 58.88   | 93.24   | 134.90  | 203.40  |
| 0.30 | 43089.66    | 71415.78    | 109070.83   | 171617.46   | 0.71 | 49.56   | 79.34   | 115.60  | 174.16  |
| 0.31 | 34936.38    | 57934.14    | 87295.22    | 139590.14   | 0.72 | 42.14   | 66.19   | 97.95   | 148.25  |
| 0.32 | 28654.84    | 46931.60    | 71821.59    | 112847.63   | 0.73 | 35.44   | 56.13   | 81.75   | 124.55  |
| 0.33 | 23459.72    | 38826.16    | 58570.81    | 93483.67    | 0.74 | 29.89   | 46.91   | 68.11   | 103.24  |
| 0.34 | 19343.33    | 31949.39    | 48330.26    | 77295.41    | 0.75 | 25.12   | 39.53   | 57.33   | 86.46   |
| 0.35 | 16063.45    | 26788.26    | 40636.46    | 64212.70    | 0.76 | 21.19   | 33.23   | 47.94   | 71.33   |
| 0.36 | 13459.49    | 22176.37    | 33570.46    | 52963.39    | 0.77 | 17.70   | 27.86   | 39.43   | 58.77   |
| 0.37 | 11217.28    | 18626.25    | 27798.91    | 44091.12    | 0.78 | 14.77   | 23.09   | 33.25   | 48.75   |
| 0.38 | 9278.97     | 15275.28    | 23159.17    | 36602.54    | 0.79 | 12.17   | 18.86   | 26.98   | 40.11   |
| 0.39 | 7813.42     | 12998.95    | 19306.96    | 30272.45    | 0.80 | 9.96    | 15.56   | 22.36   | 33.09   |
| 0.40 | 6573.85     | 10745.08    | 16383.54    | 25530.04    | 0.81 | 8.19    | 12.61   | 18.10   | 27.46   |
| 0.41 | 5556.20     | 9126.96     | 13803.09    | 21556.44    | 0.82 | 6.69    | 10.40   | 14.82   | 21.88   |
| 0.42 | 4703.46     | 7669.43     | 11666.43    | 18387.80    | 0.83 | 5.49    | 8.50    | 11.98   | 17.41   |
| 0.43 | 3926.31     | 6477.59     | 9761.30     | 15498.96    | 0.84 | 4.39    | 6.85    | 9.64    | 14.09   |
| 0.44 | 3309.27     | 5476.52     | 8292.81     | 13121.24    | 0.85 | 3.54    | 5.36    | 7.65    | 11.13   |
| 0.45 | 2843.09     | 4666.32     | 7046.69     | 11342.07    | 0.86 | 2.81    | 4.26    | 5.95    | 8.71    |
| 0.46 | 2428.34     | 3987.14     | 6115.33     | 9586.11     | 0.87 | 2.22    | 3.34    | 4.65    | 6.77    |
| 0.47 | 2068.00     | 3406.62     | 5139.58     | 8123.50     | 0.88 | 1.74    | 2.60    | 3.64    | 5.24    |
| 0.48 | 1766.89     | 2888.02     | 4400.01     | 6896.79     | 0.89 | 1.37    | 2.00    | 2.74    | 3.94    |
| 0.49 | 1490.74     | 2477.42     | 3711.88     | 5785.44     | 0.90 | 1.06    | 1.53    | 2.09    | 3.01    |
| 0.50 | 1279.18     | 2109.55     | 3148.31     | 4931.43     |      |         |         |         |         |

Table S386: Critical values for detector  $\hat{H}_{mov,sn}^{m,0.2}$  with windows size  $n = 0.2$ , and FM-OLS and D-OLS estimation in a model with intercept and linear trend. The number of integrated regressors is 3 and the highest power of  $x_{kt}$  is 1.

| m    | 90 %        | 95 %         | 97,5 %       | 99 %         | m    | 90 %    | 95 %    | 97,5 %  | 99 %     |
|------|-------------|--------------|--------------|--------------|------|---------|---------|---------|----------|
| 0.10 | 87247257.09 | 143844747.08 | 218075459.75 | 342708140.32 | 0.51 | 3929.33 | 6462.02 | 9615.17 | 14947.42 |
| 0.11 | 52290598.81 | 84925383.41  | 128474358.30 | 204896773.82 | 0.52 | 3361.06 | 5525.56 | 8230.06 | 12882.17 |
| 0.12 | 31937665.85 | 52298321.16  | 78969756.78  | 124895968.43 | 0.53 | 2885.17 | 4734.48 | 7115.20 | 10986.94 |
| 0.13 | 20535797.29 | 33775217.61  | 50813939.57  | 80301012.08  | 0.54 | 2477.37 | 4078.90 | 6061.63 | 9460.86  |
| 0.14 | 13623060.06 | 22357424.89  | 33840527.59  | 53965434.61  | 0.55 | 2127.19 | 3506.09 | 5227.22 | 7970.40  |
| 0.15 | 9313709.33  | 15440853.82  | 23452995.35  | 37193173.99  | 0.56 | 1832.19 | 2998.48 | 4493.77 | 6898.65  |
| 0.16 | 6500627.42  | 10658910.99  | 16162569.45  | 25420824.31  | 0.57 | 1581.82 | 2554.43 | 3830.72 | 5938.25  |
| 0.17 | 4638668.15  | 7619274.47   | 11400005.64  | 18030310.14  | 0.58 | 1359.58 | 2177.87 | 3262.65 | 5090.35  |
| 0.18 | 3316328.24  | 5477307.62   | 8258190.43   | 12937973.16  | 0.59 | 1166.06 | 1877.88 | 2798.17 | 4330.76  |
| 0.19 | 2406840.78  | 3970699.46   | 6040640.43   | 9467077.96   | 0.60 | 1000.38 | 1612.79 | 2392.61 | 3710.34  |
| 0.20 | 1779013.54  | 2927690.31   | 4402847.31   | 7089840.58   | 0.61 | 863.98  | 1395.03 | 2052.10 | 3224.19  |
| 0.21 | 1334716.16  | 2179827.07   | 3318999.07   | 5231864.21   | 0.62 | 742.31  | 1202.79 | 1761.74 | 2723.78  |
| 0.22 | 1011106.55  | 1675790.27   | 2513048.83   | 3957737.00   | 0.63 | 639.76  | 1029.43 | 1513.35 | 2348.40  |
| 0.23 | 776113.59   | 1296594.60   | 1978244.93   | 3122057.15   | 0.64 | 545.38  | 880.52  | 1312.67 | 1998.98  |
| 0.24 | 607593.00   | 1001119.49   | 1519822.90   | 2399958.74   | 0.65 | 465.24  | 751.65  | 1111.64 | 1722.30  |
| 0.25 | 472891.55   | 788179.45    | 1185195.39   | 1889334.78   | 0.66 | 395.14  | 642.99  | 949.87  | 1457.48  |
| 0.26 | 375220.18   | 618242.50    | 939937.25    | 1467976.78   | 0.67 | 338.23  | 548.82  | 807.53  | 1226.03  |
| 0.27 | 297272.46   | 492870.84    | 743106.25    | 1141777.08   | 0.68 | 288.76  | 466.74  | 683.62  | 1031.46  |
| 0.28 | 238389.55   | 394464.65    | 604260.10    | 943610.20    | 0.69 | 247.36  | 393.48  | 573.39  | 874.87   |
| 0.29 | 191927.25   | 319477.82    | 484863.13    | 763391.80    | 0.70 | 211.06  | 331.92  | 484.46  | 747.39   |
| 0.30 | 156365.56   | 258173.34    | 392197.21    | 628842.36    | 0.71 | 179.38  | 282.63  | 408.00  | 632.13   |
| 0.31 | 128235.50   | 210817.64    | 316271.48    | 504357.69    | 0.72 | 152.93  | 239.02  | 345.54  | 522.43   |
| 0.32 | 104318.08   | 170831.90    | 258060.84    | 410633.95    | 0.73 | 129.73  | 202.13  | 292.12  | 438.33   |
| 0.33 | 85270.95    | 140733.72    | 212694.82    | 332262.04    | 0.74 | 109.75  | 169.50  | 244.21  | 366.55   |
| 0.34 | 69969.24    | 114541.79    | 174513.62    | 274443.66    | 0.75 | 92.39   | 143.60  | 204.13  | 304.66   |
| 0.35 | 58076.42    | 95678.48     | 143475.80    | 226505.41    | 0.76 | 77.54   | 120.43  | 170.86  | 252.27   |
| 0.36 | 48170.19    | 79484.10     | 119121.93    | 187331.52    | 0.77 | 65.13   | 100.59  | 143.03  | 207.90   |
| 0.37 | 39985.17    | 66195.82     | 100250.48    | 156685.70    | 0.78 | 54.04   | 83.66   | 118.19  | 172.49   |
| 0.38 | 33599.15    | 55438.13     | 83616.48     | 130086.62    | 0.79 | 44.95   | 68.91   | 97.29   | 143.27   |
| 0.39 | 28102.61    | 46369.07     | 70423.82     | 109989.95    | 0.80 | 37.06   | 56.43   | 79.77   | 116.10   |
| 0.40 | 23651.33    | 39060.02     | 59236.32     | 92043.12     | 0.81 | 30.34   | 46.34   | 65.20   | 95.02    |
| 0.41 | 20109.91    | 32997.71     | 50013.50     | 78060.15     | 0.82 | 24.88   | 37.71   | 53.44   | 77.87    |
| 0.42 | 17020.52    | 27875.05     | 41769.57     | 65534.63     | 0.83 | 20.32   | 30.70   | 43.30   | 62.52    |
| 0.43 | 14360.90    | 23656.85     | 35495.39     | 55153.88     | 0.84 | 16.58   | 24.86   | 34.80   | 50.06    |
| 0.44 | 12064.21    | 20156.30     | 29873.86     | 47033.69     | 0.85 | 13.38   | 20.08   | 27.89   | 40.41    |
| 0.45 | 10231.03    | 16918.93     | 25532.20     | 40278.49     | 0.86 | 10.75   | 15.92   | 21.99   | 31.33    |
| 0.46 | 8742.48     | 14394.25     | 21944.35     | 34642.53     | 0.87 | 8.59    | 12.61   | 17.22   | 24.58    |
| 0.47 | 7450.53     | 12289.29     | 18679.28     | 29440.05     | 0.88 | 6.75    | 9.88    | 13.42   | 18.80    |
| 0.48 | 6348.50     | 10460.89     | 15825.79     | 24925.75     | 0.89 | 5.28    | 7.70    | 10.49   | 14.54    |
| 0.49 | 5420.64     | 8902.85      | 13456.36     | 20955.61     | 0.90 | 4.11    | 5.95    | 8.01    | 11.06    |
| 0.50 | 4610.34     | 7586.83      | 11237.40     | 17562.67     |      |         |         |         |          |

Table S387: Critical values for detector  $\hat{H}_{mov,sn}^{m,0.2}$  with windows size  $n = 0.2$ , and IM-OLS estimation in a model with intercept and linear trend. The number of integrated regressors is 3 and the highest power of  $x_{kt}$  is 1.

| m    | 90 %        | 95 %        | 97,5 %      | 99 %         | m    | 90 %    | 95 %    | 97,5 %  | 99 %    |
|------|-------------|-------------|-------------|--------------|------|---------|---------|---------|---------|
| 0.10 | 26800977.27 | 44073128.08 | 66763844.43 | 103489728.39 | 0.51 | 1220.67 | 2008.60 | 3003.42 | 4682.36 |
| 0.11 | 16043992.83 | 26316797.53 | 39832919.59 | 62701161.83  | 0.52 | 1030.23 | 1690.77 | 2554.69 | 4016.44 |
| 0.12 | 10024993.31 | 16449648.02 | 25039807.62 | 39558206.78  | 0.53 | 881.56  | 1447.45 | 2175.92 | 3415.64 |
| 0.13 | 6398722.34  | 10566729.86 | 16162973.07 | 25650834.68  | 0.54 | 754.53  | 1231.37 | 1866.55 | 2926.29 |
| 0.14 | 4297880.45  | 7053370.21  | 10779524.41 | 17296510.18  | 0.55 | 654.66  | 1062.53 | 1579.84 | 2482.12 |
| 0.15 | 2943951.87  | 4898369.20  | 7393190.29  | 11777036.96  | 0.56 | 559.33  | 903.02  | 1345.75 | 2087.89 |
| 0.16 | 2068084.08  | 3457683.79  | 5239137.97  | 8353626.16   | 0.57 | 478.41  | 775.51  | 1143.17 | 1773.02 |
| 0.17 | 1473280.11  | 2447331.79  | 3769427.24  | 5974444.45   | 0.58 | 408.80  | 660.23  | 983.40  | 1513.44 |
| 0.18 | 1068981.82  | 1779561.67  | 2664232.64  | 4215177.24   | 0.59 | 352.57  | 565.71  | 851.64  | 1313.66 |
| 0.19 | 779252.78   | 1289554.10  | 1961323.34  | 3111678.05   | 0.60 | 300.23  | 484.36  | 717.09  | 1115.31 |
| 0.20 | 578187.81   | 964852.69   | 1465357.76  | 2340623.31   | 0.61 | 258.08  | 413.73  | 615.85  | 968.50  |
| 0.21 | 433426.35   | 724019.91   | 1108264.11  | 1729007.21   | 0.62 | 220.16  | 353.66  | 523.18  | 811.35  |
| 0.22 | 330627.53   | 549643.25   | 833616.26   | 1326138.35   | 0.63 | 188.26  | 302.30  | 444.22  | 680.16  |
| 0.23 | 256289.17   | 421893.64   | 644096.77   | 1018447.37   | 0.64 | 160.29  | 256.56  | 378.88  | 578.35  |
| 0.24 | 196265.48   | 327177.79   | 500154.39   | 798943.02    | 0.65 | 135.95  | 219.14  | 320.02  | 483.39  |
| 0.25 | 153803.45   | 256642.68   | 393329.29   | 625275.50    | 0.66 | 116.25  | 184.16  | 270.16  | 409.09  |
| 0.26 | 121321.95   | 202199.55   | 305885.37   | 488640.19    | 0.67 | 98.85   | 157.68  | 230.74  | 347.34  |
| 0.27 | 97136.25    | 159199.97   | 242101.75   | 389223.02    | 0.68 | 83.99   | 133.29  | 193.25  | 289.00  |
| 0.28 | 77482.02    | 128005.36   | 194277.77   | 318911.47    | 0.69 | 70.73   | 112.21  | 163.52  | 247.96  |
| 0.29 | 62021.19    | 103307.16   | 158308.52   | 250755.34    | 0.70 | 60.53   | 95.51   | 137.81  | 208.70  |
| 0.30 | 49873.18    | 83410.50    | 127471.75   | 201032.37    | 0.71 | 50.77   | 81.02   | 117.52  | 176.98  |
| 0.31 | 40433.25    | 67508.36    | 101805.89   | 163148.09    | 0.72 | 42.92   | 67.22   | 99.29   | 150.14  |
| 0.32 | 33057.68    | 54440.28    | 83639.26    | 131075.62    | 0.73 | 35.94   | 56.83   | 82.67   | 125.51  |
| 0.33 | 27131.15    | 44896.57    | 68045.69    | 108724.87    | 0.74 | 30.24   | 47.40   | 68.76   | 104.15  |
| 0.34 | 22311.33    | 37038.22    | 56108.99    | 89648.59     | 0.75 | 25.34   | 39.84   | 57.73   | 87.02   |
| 0.35 | 18556.21    | 30942.51    | 46896.38    | 74352.94     | 0.76 | 21.35   | 33.43   | 48.16   | 71.57   |
| 0.36 | 15438.33    | 25563.19    | 38760.71    | 61164.97     | 0.77 | 17.83   | 27.99   | 39.56   | 58.98   |
| 0.37 | 12856.07    | 21391.45    | 31959.31    | 50661.05     | 0.78 | 14.86   | 23.21   | 33.36   | 48.85   |
| 0.38 | 10626.55    | 17564.33    | 26509.55    | 42070.95     | 0.79 | 12.26   | 18.96   | 27.05   | 40.22   |
| 0.39 | 8937.71     | 14900.13    | 22191.74    | 34712.21     | 0.80 | 10.07   | 15.66   | 22.46   | 33.20   |
| 0.40 | 7527.53     | 12295.20    | 18757.36    | 29366.70     | 0.81 | 8.30    | 12.73   | 18.23   | 27.60   |
| 0.41 | 6329.75     | 10411.89    | 15743.05    | 24621.35     | 0.82 | 6.81    | 10.52   | 14.94   | 21.99   |
| 0.42 | 5340.34     | 8712.38     | 13270.37    | 20859.93     | 0.83 | 5.60    | 8.63    | 12.11   | 17.56   |
| 0.43 | 4453.00     | 7355.33     | 11061.55    | 17600.34     | 0.84 | 4.51    | 6.98    | 9.76    | 14.23   |
| 0.44 | 3743.73     | 6224.02     | 9383.19     | 14870.36     | 0.85 | 3.66    | 5.49    | 7.75    | 11.25   |
| 0.45 | 3209.22     | 5265.95     | 7969.44     | 12789.04     | 0.86 | 2.93    | 4.38    | 6.07    | 8.85    |
| 0.46 | 2725.01     | 4485.89     | 6894.28     | 10790.61     | 0.87 | 2.34    | 3.46    | 4.77    | 6.88    |
| 0.47 | 2325.14     | 3827.68     | 5759.82     | 9089.92      | 0.88 | 1.86    | 2.72    | 3.75    | 5.39    |
| 0.48 | 1974.21     | 3235.63     | 4917.05     | 7731.42      | 0.89 | 1.49    | 2.12    | 2.87    | 4.07    |
| 0.49 | 1668.90     | 2764.34     | 4137.36     | 6465.07      | 0.90 | 1.20    | 1.65    | 2.21    | 3.14    |
| 0.50 | 1422.85     | 2344.05     | 3505.72     | 5492.34      |      |         |         |         |         |

Table S388: Critical values for detector  $\hat{H}_{mov,sn}^{m,0.3}$  with windows size  $n = 0.3$ , and FM-OLS and D-OLS estimation in a model with intercept and linear trend. The number of integrated regressors is 3 and the highest power of  $x_{kt}$  is 1.

| m    | 90 %        | 95 %         | 97,5 %       | 99 %         | m    | 90 %    | 95 %    | 97,5 %   | 99 %     |
|------|-------------|--------------|--------------|--------------|------|---------|---------|----------|----------|
| 0.10 | 98769331.71 | 164207579.11 | 250566987.76 | 394079665.00 | 0.51 | 4364.66 | 7158.09 | 10643.64 | 16530.42 |
| 0.11 | 59298666.19 | 97425362.77  | 147901796.58 | 235532654.35 | 0.52 | 3714.66 | 6100.39 | 9077.53  | 14154.31 |
| 0.12 | 36513808.78 | 60065868.74  | 91436623.47  | 144395250.94 | 0.53 | 3179.93 | 5210.66 | 7812.89  | 12153.80 |
| 0.13 | 23485578.85 | 38893066.92  | 59226613.61  | 93510149.18  | 0.54 | 2713.90 | 4468.51 | 6636.58  | 10402.31 |
| 0.14 | 15656999.03 | 25751711.29  | 39274015.38  | 63048910.55  | 0.55 | 2328.73 | 3832.80 | 5703.60  | 8713.55  |
| 0.15 | 10724798.87 | 17883373.20  | 27318509.45  | 43433116.69  | 0.56 | 2004.77 | 3266.01 | 4888.93  | 7469.80  |
| 0.16 | 7509454.68  | 12376053.74  | 18865148.86  | 29769842.31  | 0.57 | 1717.33 | 2776.41 | 4140.59  | 6389.10  |
| 0.17 | 5367944.45  | 8862101.61   | 13303077.90  | 21202495.25  | 0.58 | 1474.02 | 2353.81 | 3521.18  | 5481.09  |
| 0.18 | 3847964.18  | 6371945.02   | 9640112.42   | 15234487.06  | 0.59 | 1258.81 | 2019.33 | 3008.85  | 4653.72  |
| 0.19 | 2800028.55  | 4639151.73   | 7062941.30   | 11134757.39  | 0.60 | 1077.26 | 1727.12 | 2555.10  | 3965.89  |
| 0.20 | 2066004.29  | 3418716.21   | 5181421.07   | 8311597.06   | 0.61 | 924.15  | 1489.39 | 2179.94  | 3432.04  |
| 0.21 | 1552232.66  | 2554594.82   | 3905032.69   | 6176926.38   | 0.62 | 790.67  | 1277.03 | 1870.24  | 2887.33  |
| 0.22 | 1176770.48  | 1964425.70   | 2965819.70   | 4667171.38   | 0.63 | 676.80  | 1090.11 | 1598.21  | 2482.30  |
| 0.23 | 903095.69   | 1517544.51   | 2325393.41   | 3662158.40   | 0.64 | 577.67  | 927.43  | 1380.67  | 2105.13  |
| 0.24 | 708313.61   | 1170409.57   | 1785263.44   | 2824945.96   | 0.65 | 490.26  | 787.70  | 1162.43  | 1801.45  |
| 0.25 | 549655.69   | 920911.53    | 1389675.64   | 2217544.63   | 0.66 | 414.44  | 673.19  | 987.11   | 1517.34  |
| 0.26 | 435773.47   | 721239.97    | 1101303.10   | 1731714.83   | 0.67 | 353.34  | 572.24  | 837.94   | 1268.35  |
| 0.27 | 345228.55   | 575654.02    | 873129.16    | 1344333.45   | 0.68 | 299.52  | 484.08  | 707.68   | 1061.24  |
| 0.28 | 276559.64   | 460788.71    | 707730.95    | 1104344.87   | 0.69 | 256.04  | 406.77  | 591.60   | 895.51   |
| 0.29 | 222711.70   | 372861.90    | 566688.61    | 895190.41    | 0.70 | 217.24  | 341.67  | 496.56   | 761.95   |
| 0.30 | 181170.49   | 300591.93    | 457501.12    | 736354.66    | 0.71 | 183.95  | 288.92  | 416.52   | 645.32   |
| 0.31 | 148668.21   | 245293.80    | 368521.74    | 590267.25    | 0.72 | 156.21  | 243.73  | 351.34   | 530.65   |
| 0.32 | 120338.80   | 198440.79    | 299902.41    | 479073.59    | 0.73 | 132.13  | 205.32  | 296.25   | 443.97   |
| 0.33 | 98428.77    | 163053.93    | 247188.72    | 385444.17    | 0.74 | 111.28  | 171.44  | 246.75   | 369.86   |
| 0.34 | 80791.89    | 132796.75    | 201860.19    | 320585.18    | 0.75 | 93.33   | 144.92  | 205.63   | 306.37   |
| 0.35 | 66893.15    | 110422.03    | 165974.06    | 263812.87    | 0.76 | 78.16   | 121.34  | 171.86   | 253.66   |
| 0.36 | 55471.35    | 91813.72     | 137876.96    | 216880.00    | 0.77 | 65.56   | 101.02  | 143.63   | 208.59   |
| 0.37 | 46087.94    | 76290.70     | 115810.69    | 181132.26    | 0.78 | 54.28   | 83.92   | 118.44   | 173.04   |
| 0.38 | 38539.49    | 63594.91     | 95959.84     | 149764.69    | 0.79 | 45.13   | 69.08   | 97.58    | 143.49   |
| 0.39 | 32112.92    | 53098.03     | 81002.92     | 126616.97    | 0.80 | 37.20   | 56.56   | 79.85    | 116.25   |
| 0.40 | 26992.17    | 44626.45     | 67793.86     | 105405.00    | 0.81 | 30.43   | 46.45   | 65.33    | 95.13    |
| 0.41 | 22889.82    | 37722.91     | 57079.22     | 89022.77     | 0.82 | 24.99   | 37.82   | 53.55    | 77.99    |
| 0.42 | 19355.63    | 31766.14     | 47618.00     | 74821.36     | 0.83 | 20.45   | 30.83   | 43.42    | 62.63    |
| 0.43 | 16292.45    | 26866.43     | 40263.93     | 62713.12     | 0.84 | 16.71   | 24.98   | 34.93    | 50.18    |
| 0.44 | 13651.52    | 22829.06     | 33835.63     | 53142.10     | 0.85 | 13.51   | 20.21   | 28.02    | 40.51    |
| 0.45 | 11567.21    | 19116.67     | 28734.60     | 45624.59     | 0.86 | 10.87   | 16.04   | 22.12    | 31.47    |
| 0.46 | 9845.50     | 16246.49     | 24723.64     | 39006.77     | 0.87 | 8.69    | 12.71   | 17.33    | 24.67    |
| 0.47 | 8361.08     | 13828.31     | 20961.31     | 33118.81     | 0.88 | 6.86    | 9.99    | 13.52    | 18.91    |
| 0.48 | 7122.01     | 11729.78     | 17780.41     | 27773.73     | 0.89 | 5.40    | 7.81    | 10.59    | 14.63    |
| 0.49 | 6056.36     | 9949.00      | 15026.24     | 23300.24     | 0.90 | 4.22    | 6.06    | 8.12     | 11.18    |
| 0.50 | 5140.55     | 8437.04      | 12492.51     | 19554.41     |      |         |         |          |          |

Table S389: Critical values for detector  $\hat{H}_{mov,sn}^{m,0.3}$  with windows size  $n = 0.3$ , and IM-OLS estimation in a model with intercept and linear trend. The number of integrated regressors is 3 and the highest power of  $x_{kt}$  is 1.

| m    | 90 %        | 95 %        | 97,5 %      | 99 %         | m    | 90 %   | 95 %    | 97,5 %  | 99 %    |
|------|-------------|-------------|-------------|--------------|------|--------|---------|---------|---------|
| 0.10 | 15599585.90 | 39195087.34 | 84313463.35 | 208026872.01 | 0.51 | 681.59 | 1455.03 | 2929.46 | 6457.29 |
| 0.11 | 9253177.88  | 23265318.25 | 50091781.00 | 123117772.07 | 0.52 | 584.85 | 1243.47 | 2483.89 | 5400.28 |
| 0.12 | 5722127.90  | 14323972.50 | 31696332.69 | 76342827.28  | 0.53 | 499.97 | 1072.12 | 2092.06 | 4631.82 |
| 0.13 | 3643063.66  | 9035841.09  | 20245308.84 | 47108791.31  | 0.54 | 426.75 | 908.03  | 1816.73 | 3914.73 |
| 0.14 | 2412398.75  | 5989522.84  | 13232957.17 | 32345088.75  | 0.55 | 370.48 | 787.12  | 1507.24 | 3281.13 |
| 0.15 | 1628251.64  | 4123454.49  | 9128368.36  | 21369430.56  | 0.56 | 317.49 | 672.12  | 1299.68 | 2734.66 |
| 0.16 | 1136598.04  | 2887811.57  | 6282626.13  | 14693578.14  | 0.57 | 274.45 | 574.59  | 1100.44 | 2318.78 |
| 0.17 | 802868.11   | 2035295.87  | 4419105.14  | 10573890.77  | 0.58 | 232.46 | 490.74  | 950.61  | 1974.73 |
| 0.18 | 582490.16   | 1464122.92  | 3173588.74  | 7600634.09   | 0.59 | 201.49 | 417.79  | 790.62  | 1655.75 |
| 0.19 | 425000.87   | 1060245.86  | 2258925.31  | 5444611.96   | 0.60 | 173.77 | 352.11  | 680.09  | 1471.12 |
| 0.20 | 312872.09   | 785043.47   | 1692736.63  | 4008802.39   | 0.61 | 149.13 | 305.10  | 573.84  | 1253.56 |
| 0.21 | 235889.45   | 588881.03   | 1255602.64  | 3012360.05   | 0.62 | 127.84 | 262.23  | 495.64  | 1067.77 |
| 0.22 | 179744.90   | 448363.22   | 940372.03   | 2289591.66   | 0.63 | 109.86 | 224.85  | 417.64  | 886.98  |
| 0.23 | 141039.07   | 344237.90   | 739654.76   | 1775786.68   | 0.64 | 94.97  | 191.76  | 358.09  | 734.76  |
| 0.24 | 109120.45   | 265571.81   | 569684.08   | 1375145.22   | 0.65 | 81.25  | 161.01  | 299.42  | 629.17  |
| 0.25 | 84017.82    | 204693.96   | 442833.00   | 1044882.18   | 0.66 | 69.79  | 138.09  | 254.91  | 532.30  |
| 0.26 | 67514.11    | 161914.26   | 345061.70   | 820776.84    | 0.67 | 59.98  | 118.87  | 217.54  | 448.12  |
| 0.27 | 53302.46    | 128209.87   | 271216.88   | 630416.38    | 0.68 | 51.48  | 101.89  | 185.58  | 377.79  |
| 0.28 | 42436.62    | 102096.78   | 216941.10   | 516409.19    | 0.69 | 44.37  | 86.90   | 155.88  | 319.78  |
| 0.29 | 33609.28    | 82149.28    | 175407.53   | 418141.09    | 0.70 | 37.84  | 72.44   | 131.22  | 261.81  |
| 0.30 | 27040.29    | 65690.86    | 138876.64   | 332444.08    | 0.71 | 32.47  | 61.37   | 109.35  | 216.90  |
| 0.31 | 21665.15    | 53477.35    | 111632.04   | 260945.64    | 0.72 | 27.73  | 51.44   | 92.36   | 181.94  |
| 0.32 | 17898.84    | 43090.65    | 89945.13    | 211182.61    | 0.73 | 23.40  | 43.55   | 77.51   | 150.67  |
| 0.33 | 14526.44    | 35159.33    | 74441.11    | 171568.19    | 0.74 | 19.87  | 37.02   | 62.76   | 123.32  |
| 0.34 | 12012.88    | 28152.26    | 60470.69    | 139078.35    | 0.75 | 16.79  | 30.76   | 52.35   | 102.51  |
| 0.35 | 9964.42     | 23044.11    | 48990.02    | 116147.47    | 0.76 | 14.32  | 26.06   | 44.37   | 85.08   |
| 0.36 | 8314.00     | 19005.27    | 40315.71    | 95683.39     | 0.77 | 11.82  | 21.63   | 36.82   | 69.88   |
| 0.37 | 6883.46     | 15930.61    | 33110.99    | 77570.80     | 0.78 | 10.11  | 18.20   | 30.38   | 57.52   |
| 0.38 | 5680.84     | 13265.23    | 27786.95    | 62407.90     | 0.79 | 8.37   | 14.81   | 24.91   | 45.03   |
| 0.39 | 4867.04     | 11027.14    | 22799.45    | 51862.48     | 0.80 | 7.00   | 12.20   | 20.10   | 36.19   |
| 0.40 | 4095.98     | 9272.61     | 19333.96    | 43185.38     | 0.81 | 5.85   | 10.08   | 16.30   | 29.66   |
| 0.41 | 3421.56     | 7810.84     | 15971.14    | 36310.71     | 0.82 | 4.80   | 8.19    | 13.03   | 23.04   |
| 0.42 | 2875.92     | 6510.29     | 13489.46    | 30454.20     | 0.83 | 3.98   | 6.68    | 10.50   | 18.17   |
| 0.43 | 2438.36     | 5499.62     | 11200.27    | 25980.92     | 0.84 | 3.23   | 5.45    | 8.43    | 14.65   |
| 0.44 | 2066.33     | 4660.96     | 9466.20     | 21824.93     | 0.85 | 2.63   | 4.36    | 6.74    | 11.36   |
| 0.45 | 1746.93     | 3937.72     | 8001.83     | 18381.30     | 0.86 | 2.11   | 3.48    | 5.39    | 8.78    |
| 0.46 | 1473.26     | 3330.54     | 6859.97     | 15357.20     | 0.87 | 1.66   | 2.69    | 4.07    | 6.74    |
| 0.47 | 1257.35     | 2832.72     | 5682.68     | 12594.61     | 0.88 | 1.30   | 2.07    | 3.11    | 5.03    |
| 0.48 | 1082.49     | 2377.02     | 4918.32     | 11023.40     | 0.89 | 0.99   | 1.58    | 2.37    | 3.81    |
| 0.49 | 917.11      | 2030.07     | 4108.57     | 9434.99      | 0.90 | 0.75   | 1.18    | 1.74    | 2.73    |
| 0.50 | 782.69      | 1727.72     | 3452.37     | 7815.68      |      |        |         |         |         |

Table S390: Critical values for detector  $\hat{H}_{mov,sn}^{m,0.1}$  with windows size  $n = 0.1$ , and FM-OLS and D-OLS estimation in a model with intercept. The number of integrated regressors is 3 and the highest power of  $x_{kt}$  is 2.

| m    | 90 %        | 95 %         | 97,5 %       | 99 %          | m    | 90 %    | 95 %    | 97,5 %   | 99 %     |
|------|-------------|--------------|--------------|---------------|------|---------|---------|----------|----------|
| 0.10 | 96171728.22 | 251746852.83 | 565548067.61 | 1423598157.66 | 0.51 | 3802.21 | 8732.88 | 17871.19 | 41935.70 |
| 0.11 | 56888759.17 | 147216105.53 | 328039367.54 | 821190374.38  | 0.52 | 3264.85 | 7476.80 | 15448.31 | 35822.57 |
| 0.12 | 35926451.34 | 92731137.50  | 204679787.89 | 513961572.54  | 0.53 | 2789.95 | 6320.99 | 13199.57 | 30501.87 |
| 0.13 | 22904876.29 | 59612053.74  | 133822143.81 | 324309133.92  | 0.54 | 2374.69 | 5452.74 | 11213.53 | 26466.77 |
| 0.14 | 15128813.87 | 39691418.09  | 88336205.24  | 213351247.75  | 0.55 | 2024.24 | 4635.73 | 9560.34  | 22332.35 |
| 0.15 | 10210541.40 | 26597735.24  | 59401504.44  | 143868864.52  | 0.56 | 1735.51 | 3970.83 | 8153.03  | 18681.32 |
| 0.16 | 7047177.55  | 18197170.89  | 42035315.17  | 102823815.15  | 0.57 | 1490.69 | 3397.06 | 6911.59  | 15814.67 |
| 0.17 | 4995850.35  | 12878369.07  | 29491338.42  | 73743380.88   | 0.58 | 1277.99 | 2901.64 | 5871.94  | 13509.74 |
| 0.18 | 3546797.41  | 9035417.05   | 20788314.17  | 53008068.17   | 0.59 | 1098.85 | 2473.11 | 4989.23  | 11408.27 |
| 0.19 | 2563947.62  | 6760200.61   | 15199345.25  | 37390549.22   | 0.60 | 938.00  | 2083.27 | 4255.04  | 9550.13  |
| 0.20 | 1905722.02  | 4997884.67   | 11006324.16  | 26658800.20   | 0.61 | 810.20  | 1764.95 | 3597.22  | 7926.27  |
| 0.21 | 1423369.97  | 3616530.92   | 8126041.76   | 20377923.04   | 0.62 | 693.17  | 1507.72 | 3037.80  | 6767.76  |
| 0.22 | 1085683.17  | 2746004.57   | 6159277.98   | 14971767.78   | 0.63 | 595.92  | 1282.13 | 2586.41  | 5807.12  |
| 0.23 | 831997.71   | 2110616.25   | 4711668.91   | 11816230.05   | 0.64 | 509.74  | 1084.35 | 2191.28  | 4857.60  |
| 0.24 | 639556.69   | 1636561.79   | 3638150.02   | 8922202.76    | 0.65 | 436.53  | 918.87  | 1824.42  | 4037.57  |
| 0.25 | 501871.67   | 1272997.75   | 2828072.14   | 7070746.16    | 0.66 | 370.05  | 774.67  | 1535.09  | 3430.28  |
| 0.26 | 393975.69   | 1026591.56   | 2207420.23   | 5585595.99    | 0.67 | 316.65  | 649.93  | 1283.26  | 2905.72  |
| 0.27 | 313270.54   | 805593.84    | 1728742.69   | 4368603.16    | 0.68 | 270.88  | 552.39  | 1089.37  | 2411.66  |
| 0.28 | 247859.42   | 629497.01    | 1402870.72   | 3370002.16    | 0.69 | 232.17  | 466.82  | 909.55   | 2014.53  |
| 0.29 | 198962.67   | 499051.75    | 1116589.74   | 2711620.37    | 0.70 | 197.47  | 396.01  | 750.14   | 1682.39  |
| 0.30 | 158977.32   | 397454.62    | 902340.41    | 2245415.96    | 0.71 | 167.17  | 335.82  | 626.38   | 1372.71  |
| 0.31 | 129342.11   | 323033.00    | 726241.88    | 1796352.09    | 0.72 | 142.08  | 280.89  | 513.88   | 1122.60  |
| 0.32 | 105079.64   | 261508.26    | 578781.41    | 1417798.26    | 0.73 | 120.50  | 234.89  | 433.88   | 916.99   |
| 0.33 | 85964.07    | 211946.44    | 469601.42    | 1171611.10    | 0.74 | 102.36  | 198.14  | 356.91   | 725.56   |
| 0.34 | 70808.99    | 173891.62    | 383805.50    | 954289.04     | 0.75 | 86.66   | 165.78  | 296.21   | 591.45   |
| 0.35 | 58847.41    | 143009.32    | 310190.42    | 753635.87     | 0.76 | 73.13   | 138.63  | 243.07   | 487.00   |
| 0.36 | 47298.82    | 117170.48    | 256523.79    | 616733.86     | 0.77 | 60.93   | 115.19  | 201.55   | 401.56   |
| 0.37 | 39392.63    | 97861.83     | 207765.84    | 505645.16     | 0.78 | 51.24   | 95.26   | 167.34   | 327.35   |
| 0.38 | 32921.90    | 81155.31     | 172440.43    | 419046.68     | 0.79 | 42.94   | 77.56   | 136.50   | 266.74   |
| 0.39 | 27676.17    | 67903.38     | 144458.42    | 347593.35     | 0.80 | 35.68   | 63.61   | 110.15   | 216.55   |
| 0.40 | 23312.81    | 56714.24     | 120177.85    | 285991.63     | 0.81 | 29.39   | 51.90   | 88.18    | 170.30   |
| 0.41 | 19570.57    | 46845.25     | 102641.11    | 243448.35     | 0.82 | 24.41   | 42.47   | 70.25    | 137.03   |
| 0.42 | 16320.09    | 39057.42     | 84515.62     | 200370.60     | 0.83 | 20.11   | 34.42   | 56.78    | 105.45   |
| 0.43 | 13736.84    | 32883.89     | 71830.51     | 168368.68     | 0.84 | 16.55   | 28.03   | 45.29    | 83.32    |
| 0.44 | 11613.18    | 27687.13     | 59771.37     | 141203.77     | 0.85 | 13.46   | 22.56   | 35.51    | 64.41    |
| 0.45 | 9857.40     | 23356.34     | 49894.89     | 119159.99     | 0.86 | 10.86   | 17.93   | 27.93    | 49.11    |
| 0.46 | 8353.89     | 19689.69     | 41523.51     | 98998.30      | 0.87 | 8.69    | 14.10   | 21.82    | 37.29    |
| 0.47 | 7142.53     | 16655.77     | 35151.62     | 83927.43      | 0.88 | 6.90    | 11.01   | 16.76    | 28.05    |
| 0.48 | 6203.53     | 14157.42     | 29534.73     | 71045.72      | 0.89 | 5.41    | 8.52    | 12.61    | 20.76    |
| 0.49 | 5281.69     | 11981.44     | 25001.12     | 60070.41      | 0.90 | 4.18    | 6.47    | 9.47     | 15.07    |
| 0.50 | 4468.05     | 10237.41     | 21201.06     | 50510.40      |      |         |         |          |          |

Table S391: Critical values for detector  $\hat{H}_{mov,sn}^{m,0.1}$  with windows size  $n = 0.1$ , and IM-OLS estimation in a model with intercept. The number of integrated regressors is 3 and the highest power of  $x_{kt}$  is 2.



| m    | 90 %        | 95 %        | 97,5 %       | 99 %         | m    | 90 %   | 95 %    | 97,5 %  | 99 %    |
|------|-------------|-------------|--------------|--------------|------|--------|---------|---------|---------|
| 0.10 | 24014536.28 | 60775952.04 | 131234601.28 | 328075624.82 | 0.51 | 981.21 | 2088.03 | 4142.43 | 9003.10 |
| 0.11 | 14240158.36 | 36126197.25 | 78110782.54  | 196342557.82 | 0.52 | 839.13 | 1774.01 | 3453.87 | 7548.90 |
| 0.12 | 8796379.25  | 22260967.37 | 49407978.93  | 119238807.34 | 0.53 | 712.63 | 1509.28 | 2928.38 | 6474.97 |
| 0.13 | 5633940.70  | 13955213.99 | 31565360.69  | 73552500.61  | 0.54 | 606.51 | 1279.89 | 2543.72 | 5365.76 |
| 0.14 | 3719316.52  | 9256913.12  | 20743689.45  | 50134588.61  | 0.55 | 520.72 | 1095.67 | 2078.80 | 4505.13 |
| 0.15 | 2506842.41  | 6413646.87  | 14244998.97  | 33223335.10  | 0.56 | 445.34 | 939.15  | 1780.14 | 3739.61 |
| 0.16 | 1754761.59  | 4472758.71  | 9828823.02   | 23006475.67  | 0.57 | 383.82 | 796.34  | 1521.52 | 3152.98 |
| 0.17 | 1240752.56  | 3145924.22  | 6834721.16   | 16626018.15  | 0.58 | 324.26 | 671.51  | 1288.46 | 2647.93 |
| 0.18 | 894667.73   | 2262164.74  | 4880006.42   | 11851423.88  | 0.59 | 278.81 | 573.07  | 1064.20 | 2209.66 |
| 0.19 | 652051.08   | 1636814.43  | 3461782.57   | 8444506.25   | 0.60 | 239.09 | 481.16  | 915.02  | 1936.92 |
| 0.20 | 481423.97   | 1203004.58  | 2628037.11   | 6234138.72   | 0.61 | 205.07 | 409.98  | 769.55  | 1631.85 |
| 0.21 | 362601.44   | 903543.64   | 1933266.48   | 4653071.78   | 0.62 | 174.49 | 349.45  | 654.86  | 1390.50 |
| 0.22 | 276194.56   | 687271.17   | 1466813.00   | 3516067.16   | 0.63 | 149.16 | 299.30  | 549.65  | 1148.21 |
| 0.23 | 216717.54   | 527270.62   | 1135928.41   | 2730572.25   | 0.64 | 127.23 | 253.63  | 467.46  | 952.34  |
| 0.24 | 167622.32   | 407452.89   | 881255.85    | 2124034.05   | 0.65 | 108.51 | 213.32  | 387.22  | 801.20  |
| 0.25 | 128281.23   | 310941.76   | 679783.10    | 1608845.55   | 0.66 | 92.24  | 179.94  | 328.55  | 669.94  |
| 0.26 | 102866.51   | 246097.73   | 529459.68    | 1245267.11   | 0.67 | 78.68  | 153.91  | 278.82  | 561.51  |
| 0.27 | 81438.54    | 194890.65   | 412718.46    | 960305.57    | 0.68 | 67.19  | 130.21  | 235.38  | 467.70  |
| 0.28 | 64853.99    | 155153.67   | 332806.37    | 787659.36    | 0.69 | 57.12  | 111.01  | 197.57  | 397.51  |
| 0.29 | 51135.82    | 124742.35   | 263983.75    | 640519.01    | 0.70 | 48.33  | 91.60   | 163.49  | 320.49  |
| 0.30 | 41150.29    | 100167.10   | 212328.92    | 498170.62    | 0.71 | 41.14  | 76.49   | 135.30  | 262.85  |
| 0.31 | 32900.94    | 80802.05    | 168214.96    | 399823.70    | 0.72 | 34.72  | 64.03   | 111.92  | 218.74  |
| 0.32 | 27123.72    | 65149.15    | 136320.66    | 318847.38    | 0.73 | 29.13  | 53.12   | 93.88   | 178.18  |
| 0.33 | 22044.13    | 53324.89    | 111922.20    | 259140.71    | 0.74 | 24.41  | 44.77   | 74.88   | 144.27  |
| 0.34 | 18228.38    | 42278.02    | 90625.33     | 209868.06    | 0.75 | 20.45  | 37.01   | 61.64   | 119.22  |
| 0.35 | 15072.70    | 34564.28    | 73706.94     | 172070.66    | 0.76 | 17.17  | 30.94   | 51.51   | 98.12   |
| 0.36 | 12485.64    | 28631.57    | 60802.89     | 142582.67    | 0.77 | 14.07  | 25.32   | 42.25   | 79.92   |
| 0.37 | 10369.02    | 23765.99    | 49220.62     | 114531.35    | 0.78 | 11.83  | 21.05   | 34.75   | 64.16   |
| 0.38 | 8567.22     | 19733.50    | 41218.71     | 91947.81     | 0.79 | 9.64   | 16.75   | 27.87   | 49.97   |
| 0.39 | 7285.69     | 16477.25    | 33597.40     | 76763.26     | 0.80 | 7.94   | 13.67   | 22.17   | 39.24   |
| 0.40 | 6087.62     | 13720.43    | 28657.76     | 63943.43     | 0.81 | 6.50   | 11.12   | 17.87   | 31.77   |
| 0.41 | 5090.06     | 11563.49    | 23472.74     | 52419.41     | 0.82 | 5.28   | 8.89    | 14.00   | 24.44   |
| 0.42 | 4269.23     | 9682.34     | 19795.40     | 44728.50     | 0.83 | 4.30   | 7.17    | 11.15   | 19.08   |
| 0.43 | 3598.12     | 8092.13     | 16173.04     | 37805.36     | 0.84 | 3.47   | 5.76    | 8.87    | 15.21   |
| 0.44 | 3057.52     | 6842.81     | 13814.99     | 31609.34     | 0.85 | 2.78   | 4.58    | 7.03    | 11.74   |
| 0.45 | 2574.72     | 5695.66     | 11624.82     | 26310.01     | 0.86 | 2.22   | 3.62    | 5.55    | 9.01    |
| 0.46 | 2170.75     | 4878.39     | 9896.99      | 21878.54     | 0.87 | 1.74   | 2.79    | 4.18    | 6.88    |
| 0.47 | 1836.04     | 4103.20     | 8159.89      | 18094.48     | 0.88 | 1.37   | 2.15    | 3.21    | 5.12    |
| 0.48 | 1578.67     | 3426.94     | 7066.85      | 15495.01     | 0.89 | 1.07   | 1.66    | 2.44    | 3.88    |
| 0.49 | 1325.47     | 2916.70     | 5874.15      | 13213.73     | 0.90 | 0.86   | 1.26    | 1.83    | 2.82    |
| 0.50 | 1131.87     | 2463.78     | 4913.44      | 10927.24     |      |        |         |         |         |

Table S392: Critical values for detector  $\hat{H}_{mov,sn}^{m,0.2}$  with windows size  $n = 0.2$ , and FM-OLS and D-OLS estimation in a model with intercept. The number of integrated regressors is 3 and the highest power of  $x_{kt}$  is 2.

| m    | 90 %         | 95 %         | 97,5 %       | 99 %          | m    | 90 %    | 95 %     | 97,5 %   | 99 %     |
|------|--------------|--------------|--------------|---------------|------|---------|----------|----------|----------|
| 0.10 | 147811361.47 | 392019584.47 | 883253254.35 | 2232379936.88 | 0.51 | 5439.07 | 12409.25 | 25151.95 | 59100.93 |
| 0.11 | 87483472.75  | 227936244.81 | 514597471.61 | 1276592462.12 | 0.52 | 4639.48 | 10641.81 | 21602.83 | 49403.77 |
| 0.12 | 55192256.38  | 144210947.27 | 317971022.90 | 803727065.86  | 0.53 | 3969.00 | 8926.33  | 18459.75 | 41603.90 |
| 0.13 | 35234209.69  | 92712631.57  | 208281761.33 | 507978811.63  | 0.54 | 3379.56 | 7578.76  | 15614.26 | 36055.03 |
| 0.14 | 23374611.58  | 62023241.29  | 137163677.67 | 333472581.50  | 0.55 | 2859.78 | 6515.59  | 13232.11 | 30573.28 |
| 0.15 | 15658689.59  | 41385265.96  | 91791374.79  | 222805291.03  | 0.56 | 2439.26 | 5482.28  | 11232.26 | 25407.39 |
| 0.16 | 10854669.14  | 28267534.05  | 65489292.76  | 161471108.25  | 0.57 | 2079.82 | 4659.31  | 9408.60  | 21371.40 |
| 0.17 | 7687450.77   | 19886646.01  | 45002819.41  | 115005274.69  | 0.58 | 1766.86 | 3960.25  | 7953.00  | 18259.99 |
| 0.18 | 5478761.12   | 13920681.38  | 32166164.64  | 82733682.11   | 0.59 | 1518.27 | 3351.17  | 6724.72  | 15137.81 |
| 0.19 | 3942460.02   | 10432060.42  | 23599081.68  | 58354686.48   | 0.60 | 1289.39 | 2823.26  | 5632.63  | 12664.22 |
| 0.20 | 2927636.54   | 7706469.11   | 17028641.99  | 41496993.60   | 0.61 | 1105.11 | 2385.17  | 4753.81  | 10470.52 |
| 0.21 | 2180605.85   | 5570992.93   | 12559842.42  | 31281879.24   | 0.62 | 936.40  | 2008.38  | 4009.81  | 8829.69  |
| 0.22 | 1658873.17   | 4197860.97   | 9506977.94   | 23215150.37   | 0.63 | 800.58  | 1708.04  | 3380.75  | 7412.22  |
| 0.23 | 1270810.98   | 3225518.68   | 7235363.29   | 18297226.83   | 0.64 | 685.76  | 1434.96  | 2840.60  | 6271.65  |
| 0.24 | 982975.15    | 2497143.52   | 5597249.21   | 13824475.70   | 0.65 | 579.28  | 1206.09  | 2362.63  | 5156.18  |
| 0.25 | 770476.12    | 1945444.96   | 4372471.92   | 10822406.79   | 0.66 | 488.85  | 1009.30  | 1967.67  | 4336.71  |
| 0.26 | 600791.49    | 1565720.66   | 3390261.68   | 8539832.44    | 0.67 | 413.22  | 840.86   | 1635.18  | 3655.28  |
| 0.27 | 475770.84    | 1236542.22   | 2640562.42   | 6701632.84    | 0.68 | 350.92  | 704.43   | 1377.49  | 2996.92  |
| 0.28 | 376269.17    | 956941.91    | 2118486.90   | 5157126.70    | 0.69 | 298.74  | 592.08   | 1140.23  | 2479.29  |
| 0.29 | 302260.27    | 755903.08    | 1700233.50   | 4165476.83    | 0.70 | 252.38  | 500.52   | 936.39   | 2039.12  |
| 0.30 | 242117.70    | 603522.70    | 1364968.52   | 3366139.30    | 0.71 | 210.90  | 419.54   | 764.78   | 1670.04  |
| 0.31 | 196124.66    | 487505.16    | 1096298.08   | 2684344.77    | 0.72 | 179.49  | 346.92   | 624.57   | 1327.48  |
| 0.32 | 158882.11    | 392931.71    | 870775.12    | 2136904.03    | 0.73 | 150.21  | 286.25   | 515.72   | 1086.23  |
| 0.33 | 129371.28    | 319952.24    | 700832.86    | 1757830.52    | 0.74 | 125.88  | 239.36   | 422.63   | 849.33   |
| 0.34 | 106274.43    | 260851.27    | 577079.20    | 1430517.41    | 0.75 | 105.95  | 198.59   | 348.55   | 681.36   |
| 0.35 | 87594.22     | 213560.29    | 464750.21    | 1131995.30    | 0.76 | 87.82   | 164.77   | 285.37   | 556.67   |
| 0.36 | 71245.44     | 175234.15    | 378776.28    | 916539.29     | 0.77 | 72.73   | 134.74   | 233.60   | 454.44   |
| 0.37 | 58888.30     | 145675.36    | 310130.47    | 757464.67     | 0.78 | 60.38   | 109.90   | 189.75   | 365.87   |
| 0.38 | 49175.85     | 120184.02    | 255240.32    | 616033.24     | 0.79 | 49.99   | 88.89    | 152.04   | 296.67   |
| 0.39 | 41410.11     | 99725.69     | 211596.58    | 507999.16     | 0.80 | 40.92   | 71.93    | 122.52   | 235.90   |
| 0.40 | 34648.00     | 84059.65     | 177090.30    | 421927.76     | 0.81 | 33.22   | 57.65    | 96.23    | 184.05   |
| 0.41 | 28940.76     | 69472.32     | 150729.87    | 355190.18     | 0.82 | 27.22   | 46.50    | 75.91    | 146.56   |
| 0.42 | 24108.91     | 57850.61     | 122847.83    | 290993.74     | 0.83 | 22.13   | 37.30    | 60.42    | 111.53   |
| 0.43 | 20309.42     | 48333.21     | 104595.21    | 243169.66     | 0.84 | 17.95   | 29.92    | 47.93    | 86.58    |
| 0.44 | 17039.82     | 40161.96     | 86608.94     | 204544.21     | 0.85 | 14.38   | 23.74    | 37.19    | 66.61    |
| 0.45 | 14457.52     | 34023.21     | 71539.92     | 172731.06     | 0.86 | 11.47   | 18.75    | 28.86    | 50.65    |
| 0.46 | 12292.54     | 28551.93     | 60089.02     | 140578.15     | 0.87 | 9.08    | 14.59    | 22.44    | 37.94    |
| 0.47 | 10418.76     | 24012.44     | 50732.47     | 119142.45     | 0.88 | 7.13    | 11.29    | 17.08    | 28.40    |
| 0.48 | 8952.97      | 20392.19     | 41963.33     | 100101.97     | 0.89 | 5.57    | 8.69     | 12.81    | 20.97    |
| 0.49 | 7581.20      | 17159.25     | 35462.57     | 84675.39      | 0.90 | 4.29    | 6.60     | 9.60     | 15.16    |
| 0.50 | 6439.77      | 14487.43     | 30123.44     | 71042.75      |      |         |          |          |          |

Table S393: Critical values for detector  $\hat{H}_{mov,sn}^{m,0.2}$  with windows size  $n = 0.2$ , and IM-OLS estimation in a model with intercept. The number of integrated regressors is 3 and the highest power of  $x_{kt}$  is 2.

| m    | 90 %        | 95 %        | 97,5 %       | 99 %         | m    | 90 %    | 95 %    | 97,5 %  | 99 %    |
|------|-------------|-------------|--------------|--------------|------|---------|---------|---------|---------|
| 0.10 | 28396832.91 | 72353054.05 | 157288229.27 | 392387559.45 | 0.51 | 1086.54 | 2296.90 | 4525.35 | 9817.72 |
| 0.11 | 16834970.00 | 42695385.91 | 93370014.72  | 233029645.45 | 0.52 | 927.22  | 1942.81 | 3755.71 | 8320.35 |
| 0.12 | 10373319.30 | 26304074.34 | 58708426.09  | 140855565.36 | 0.53 | 785.34  | 1640.40 | 3162.66 | 6968.76 |
| 0.13 | 6648405.28  | 16552161.54 | 37505264.03  | 88186757.17  | 0.54 | 665.04  | 1393.29 | 2742.01 | 5744.20 |
| 0.14 | 4375849.93  | 10938397.44 | 24435567.66  | 59383899.07  | 0.55 | 572.93  | 1193.25 | 2247.12 | 4811.55 |
| 0.15 | 2953927.35  | 7571648.58  | 16809704.10  | 39635543.05  | 0.56 | 485.25  | 1017.27 | 1930.83 | 3973.43 |
| 0.16 | 2071092.72  | 5315318.88  | 11593396.60  | 27085113.93  | 0.57 | 417.46  | 858.60  | 1627.10 | 3338.60 |
| 0.17 | 1456654.62  | 3704045.37  | 8081457.67   | 19443490.56  | 0.58 | 351.74  | 722.64  | 1371.51 | 2800.49 |
| 0.18 | 1050792.87  | 2662488.95  | 5731624.14   | 14044461.05  | 0.59 | 301.57  | 612.32  | 1134.22 | 2325.26 |
| 0.19 | 768073.70   | 1925427.70  | 4111058.87   | 9851208.40   | 0.60 | 257.67  | 510.99  | 961.88  | 2018.40 |
| 0.20 | 566706.34   | 1420687.55  | 3092892.07   | 7317690.13   | 0.61 | 220.78  | 436.28  | 811.19  | 1693.63 |
| 0.21 | 427423.01   | 1059691.95  | 2276702.08   | 5458592.45   | 0.62 | 186.20  | 368.99  | 690.16  | 1450.29 |
| 0.22 | 324361.67   | 805089.71   | 1720548.19   | 4151059.08   | 0.63 | 158.12  | 313.28  | 574.49  | 1190.54 |
| 0.23 | 254386.56   | 618600.29   | 1326392.00   | 3191130.13   | 0.64 | 134.03  | 266.06  | 485.11  | 987.01  |
| 0.24 | 196816.17   | 475970.40   | 1032860.09   | 2479345.71   | 0.65 | 113.90  | 222.96  | 401.05  | 834.31  |
| 0.25 | 149903.66   | 363229.22   | 791797.34    | 1864417.89   | 0.66 | 96.55   | 186.89  | 337.98  | 688.57  |
| 0.26 | 120807.85   | 287766.69   | 617208.26    | 1432302.19   | 0.67 | 81.88   | 158.81  | 286.83  | 574.05  |
| 0.27 | 95156.82    | 227508.75   | 482542.72    | 1116697.20   | 0.68 | 69.61   | 134.09  | 240.66  | 477.53  |
| 0.28 | 75688.99    | 180452.06   | 385017.58    | 918084.41    | 0.69 | 58.92   | 113.50  | 202.32  | 405.39  |
| 0.29 | 59496.95    | 144911.97   | 304275.19    | 742348.70    | 0.70 | 49.55   | 93.71   | 166.44  | 324.42  |
| 0.30 | 47862.06    | 115828.06   | 246690.06    | 577223.27    | 0.71 | 42.03   | 77.97   | 137.51  | 266.55  |
| 0.31 | 38329.40    | 92980.86    | 195247.40    | 457380.29    | 0.72 | 35.42   | 64.99   | 113.24  | 220.56  |
| 0.32 | 31427.30    | 75095.57    | 156372.86    | 364645.83    | 0.73 | 29.59   | 53.70   | 94.87   | 179.63  |
| 0.33 | 25569.73    | 61751.17    | 129175.99    | 295437.96    | 0.74 | 24.71   | 45.19   | 75.23   | 144.85  |
| 0.34 | 21058.95    | 48817.19    | 103327.14    | 240221.48    | 0.75 | 20.66   | 37.28   | 61.95   | 119.78  |
| 0.35 | 17341.33    | 39665.29    | 84247.68     | 196451.13    | 0.76 | 17.30   | 31.12   | 51.76   | 98.32   |
| 0.36 | 14373.56    | 32944.04    | 69330.10     | 164209.01    | 0.77 | 14.17   | 25.43   | 42.36   | 80.16   |
| 0.37 | 11923.76    | 27221.51    | 55928.88     | 130471.87    | 0.78 | 11.93   | 21.12   | 34.83   | 64.35   |
| 0.38 | 9891.39     | 22491.75    | 46764.15     | 104249.56    | 0.79 | 9.72    | 16.84   | 27.95   | 50.07   |
| 0.39 | 8351.59     | 18711.37    | 38128.03     | 87241.00     | 0.80 | 8.03    | 13.74   | 22.26   | 39.42   |
| 0.40 | 6954.58     | 15633.27    | 32303.50     | 71592.44     | 0.81 | 6.61    | 11.23   | 17.97   | 31.91   |
| 0.41 | 5817.01     | 13100.22    | 26446.06     | 58877.73     | 0.82 | 5.38    | 9.00    | 14.11   | 24.51   |
| 0.42 | 4867.86     | 11028.81    | 22227.86     | 50194.65     | 0.83 | 4.41    | 7.27    | 11.26   | 19.17   |
| 0.43 | 4097.00     | 9118.74     | 18170.84     | 41916.83     | 0.84 | 3.58    | 5.89    | 8.98    | 15.32   |
| 0.44 | 3450.79     | 7703.33     | 15405.22     | 35020.06     | 0.85 | 2.90    | 4.70    | 7.14    | 11.84   |
| 0.45 | 2893.65     | 6379.26     | 12985.78     | 29198.79     | 0.86 | 2.33    | 3.74    | 5.66    | 9.11    |
| 0.46 | 2453.76     | 5441.43     | 10990.59     | 23956.45     | 0.87 | 1.86    | 2.90    | 4.29    | 6.99    |
| 0.47 | 2064.36     | 4570.70     | 9060.79      | 19940.82     | 0.88 | 1.49    | 2.28    | 3.32    | 5.22    |
| 0.48 | 1769.77     | 3819.29     | 7825.43      | 17085.44     | 0.89 | 1.20    | 1.78    | 2.57    | 4.01    |
| 0.49 | 1480.32     | 3230.60     | 6454.12      | 14401.08     | 0.90 | 1.01    | 1.38    | 1.95    | 2.94    |
| 0.50 | 1262.60     | 2722.41     | 5425.83      | 11972.88     |      |         |         |         |         |

Table S394: Critical values for detector  $\hat{H}_{mov,sn}^{m,0.3}$  with windows size  $n = 0.3$ , and FM-OLS and D-OLS estimation in a model with intercept. The number of integrated regressors is 3 and the highest power of  $x_{kt}$  is 2.

| m    | 90 %         | 95 %         | 97,5 %        | 99 %          | m    | 90 %    | 95 %     | 97,5 %   | 99 %     |
|------|--------------|--------------|---------------|---------------|------|---------|----------|----------|----------|
| 0.10 | 174073939.92 | 463734076.62 | 1055278053.03 | 2666658302.45 | 0.51 | 6013.34 | 13579.16 | 27550.32 | 64295.47 |
| 0.11 | 102804999.09 | 270509704.88 | 613623916.52  | 1530218950.90 | 0.52 | 5133.25 | 11621.11 | 23562.13 | 53903.63 |
| 0.12 | 65081912.09  | 171194733.21 | 376875977.52  | 945027233.95  | 0.53 | 4385.26 | 9750.82  | 20075.47 | 44828.01 |
| 0.13 | 41409278.25  | 109240030.21 | 248722107.84  | 602554705.82  | 0.54 | 3712.30 | 8252.99  | 16822.17 | 38206.34 |
| 0.14 | 27390220.29  | 73119358.48  | 162801502.12  | 393771300.65  | 0.55 | 3116.80 | 7050.48  | 14266.26 | 32375.65 |
| 0.15 | 18502111.37  | 48692244.84  | 108924778.25  | 265547734.66  | 0.56 | 2668.00 | 5898.53  | 12045.91 | 27119.63 |
| 0.16 | 12743325.20  | 33473575.26  | 77463391.41   | 192979723.01  | 0.57 | 2261.22 | 4980.58  | 10077.92 | 22712.02 |
| 0.17 | 9067795.43   | 23419402.45  | 53260560.25   | 137777509.56  | 0.58 | 1914.57 | 4231.48  | 8472.42  | 19307.71 |
| 0.18 | 6425113.69   | 16462917.27  | 37900149.56   | 97562103.27   | 0.59 | 1639.15 | 3576.85  | 7143.83  | 16017.14 |
| 0.19 | 4637211.16   | 12172485.13  | 27950832.21   | 68536054.54   | 0.60 | 1383.25 | 3015.25  | 5966.95  | 13253.51 |
| 0.20 | 3450916.38   | 8997815.30   | 20093424.62   | 49054510.13   | 0.61 | 1179.03 | 2532.25  | 5027.56  | 10994.42 |
| 0.21 | 2548528.29   | 6525475.67   | 14759269.95   | 36564261.75   | 0.62 | 996.95  | 2125.55  | 4197.20  | 9136.47  |
| 0.22 | 1954239.72   | 4933103.02   | 11155062.81   | 27393756.95   | 0.63 | 849.81  | 1795.65  | 3515.58  | 7682.31  |
| 0.23 | 1489500.01   | 3771800.06   | 8481593.31    | 21561909.73   | 0.64 | 723.81  | 1505.94  | 2951.16  | 6473.00  |
| 0.24 | 1148926.01   | 2934876.33   | 6553181.27    | 15980880.44   | 0.65 | 609.12  | 1258.96  | 2445.46  | 5296.19  |
| 0.25 | 896919.83    | 2273825.59   | 5091854.41    | 12695615.28   | 0.66 | 510.35  | 1051.56  | 2026.99  | 4452.38  |
| 0.26 | 701677.60    | 1822052.76   | 3941163.94    | 9887129.77    | 0.67 | 430.59  | 869.32   | 1682.99  | 3730.60  |
| 0.27 | 556429.26    | 1436228.26   | 3074362.39    | 7756790.01    | 0.68 | 364.57  | 726.97   | 1409.55  | 3059.38  |
| 0.28 | 437868.69    | 1110400.69   | 2454049.07    | 5978768.94    | 0.69 | 308.39  | 607.12   | 1166.79  | 2522.64  |
| 0.29 | 351647.01    | 872702.48    | 1971856.30    | 4789781.10    | 0.70 | 259.13  | 509.48   | 952.69   | 2070.21  |
| 0.30 | 282046.85    | 700037.40    | 1575126.15    | 3921504.31    | 0.71 | 215.56  | 426.93   | 776.89   | 1687.77  |
| 0.31 | 227398.42    | 565324.02    | 1257464.55    | 3062375.56    | 0.72 | 183.01  | 351.92   | 632.51   | 1343.05  |
| 0.32 | 183946.55    | 454210.07    | 999729.55     | 2450130.65    | 0.73 | 152.56  | 290.34   | 520.04   | 1093.72  |
| 0.33 | 149573.90    | 367112.29    | 805822.05     | 2002876.46    | 0.74 | 127.62  | 241.36   | 424.93   | 854.52   |
| 0.34 | 123264.74    | 298625.82    | 656496.43     | 1628924.20    | 0.75 | 107.02  | 200.23   | 350.40   | 683.34   |
| 0.35 | 100519.18    | 244617.48    | 532497.81     | 1282247.61    | 0.76 | 88.57   | 165.75   | 286.48   | 559.00   |
| 0.36 | 81785.99     | 200297.03    | 431900.96     | 1039014.90    | 0.77 | 73.15   | 135.15   | 234.18   | 455.07   |
| 0.37 | 68073.78     | 166050.32    | 349955.00     | 859075.96     | 0.78 | 60.66   | 110.15   | 190.18   | 366.48   |
| 0.38 | 56374.54     | 136967.26    | 289808.60     | 691405.49     | 0.79 | 50.14   | 89.08    | 152.14   | 296.89   |
| 0.39 | 47286.46     | 113831.95    | 238267.59     | 571904.69     | 0.80 | 41.03   | 72.01    | 122.63   | 236.01   |
| 0.40 | 39451.43     | 95032.60     | 199377.96     | 473003.01     | 0.81 | 33.34   | 57.79    | 96.39    | 184.21   |
| 0.41 | 32963.78     | 78479.05     | 171009.75     | 396713.26     | 0.82 | 27.34   | 46.60    | 76.06    | 146.66   |
| 0.42 | 27324.54     | 65479.32     | 138092.26     | 324229.49     | 0.83 | 22.23   | 37.42    | 60.52    | 111.61   |
| 0.43 | 22928.24     | 54543.37     | 116334.01     | 270495.18     | 0.84 | 18.05   | 30.01    | 48.06    | 86.68    |
| 0.44 | 19304.62     | 45226.02     | 97103.29      | 224532.23     | 0.85 | 14.49   | 23.86    | 37.31    | 66.78    |
| 0.45 | 16217.48     | 38046.70     | 79903.95      | 191921.38     | 0.86 | 11.58   | 18.85    | 28.98    | 50.82    |
| 0.46 | 13760.16     | 31920.44     | 67047.39      | 155287.18     | 0.87 | 9.18    | 14.70    | 22.56    | 38.04    |
| 0.47 | 11726.81     | 26759.13     | 56516.98      | 131707.77     | 0.88 | 7.24    | 11.41    | 17.19    | 28.48    |
| 0.48 | 10039.98     | 22611.22     | 46145.83      | 109547.67     | 0.89 | 5.68    | 8.80     | 12.91    | 21.09    |
| 0.49 | 8474.56      | 19010.79     | 38795.74      | 92508.65      | 0.90 | 4.40    | 6.69     | 9.69     | 15.28    |
| 0.50 | 7153.30      | 15936.26     | 32788.05      | 77002.96      |      |         |          |          |          |

Table S395: Critical values for detector  $\hat{H}_{mov,sn}^{m,0.3}$  with windows size  $n = 0.3$ , and IM-OLS estimation in a model with intercept. The number of integrated regressors is 3 and the highest power of  $x_{kt}$  is 2.

| m    | 90 %        | 95 %         | 97,5 %       | 99 %         | m    | 90 %    | 95 %    | 97,5 %  | 99 %     |
|------|-------------|--------------|--------------|--------------|------|---------|---------|---------|----------|
| 0.10 | 67371073.41 | 133885876.67 | 256531655.05 | 555168472.82 | 0.51 | 1744.31 | 3206.69 | 5618.43 | 11261.83 |
| 0.11 | 38698211.56 | 77077473.04  | 145831286.22 | 320784110.00 | 0.52 | 1479.44 | 2735.03 | 4709.63 | 9492.61  |
| 0.12 | 23440036.81 | 45985485.92  | 86688102.96  | 189102577.31 | 0.53 | 1261.49 | 2340.61 | 4003.84 | 8058.92  |
| 0.13 | 14522805.45 | 28831417.22  | 54428960.02  | 112804004.27 | 0.54 | 1073.83 | 2000.76 | 3417.93 | 6855.74  |
| 0.14 | 9420135.06  | 18669256.45  | 34712238.31  | 73452136.78  | 0.55 | 922.00  | 1697.67 | 2910.79 | 5586.58  |
| 0.15 | 6256288.92  | 12354843.81  | 23029845.68  | 49076829.43  | 0.56 | 792.45  | 1425.01 | 2443.76 | 4713.92  |
| 0.16 | 4264309.33  | 8511240.55   | 15665957.92  | 33237705.54  | 0.57 | 675.08  | 1222.94 | 2084.82 | 4044.91  |
| 0.17 | 2973739.93  | 5808242.64   | 10839550.60  | 23028568.51  | 0.58 | 575.10  | 1042.83 | 1788.56 | 3349.18  |
| 0.18 | 2094462.00  | 4073085.65   | 7609966.28   | 16308479.19  | 0.59 | 495.44  | 888.10  | 1518.26 | 2875.44  |
| 0.19 | 1490230.30  | 2924837.09   | 5437455.48   | 11590550.91  | 0.60 | 421.85  | 757.66  | 1294.50 | 2488.68  |
| 0.20 | 1090642.96  | 2134556.79   | 3946165.45   | 8334591.08   | 0.61 | 359.40  | 651.48  | 1095.56 | 2139.28  |
| 0.21 | 802307.27   | 1570162.78   | 2874191.69   | 6177313.26   | 0.62 | 307.21  | 562.17  | 941.45  | 1801.46  |
| 0.22 | 602481.70   | 1159461.47   | 2149221.00   | 4617659.25   | 0.63 | 263.90  | 475.87  | 796.57  | 1522.89  |
| 0.23 | 462839.62   | 898311.63    | 1606576.64   | 3429990.18   | 0.64 | 223.98  | 405.96  | 678.36  | 1286.60  |
| 0.24 | 350945.29   | 687194.94    | 1236521.81   | 2606957.31   | 0.65 | 190.69  | 337.83  | 578.42  | 1104.01  |
| 0.25 | 271394.63   | 526796.38    | 956631.46    | 2006748.95   | 0.66 | 161.86  | 288.12  | 485.02  | 914.11   |
| 0.26 | 211184.22   | 410530.87    | 741348.22    | 1580029.59   | 0.67 | 137.97  | 243.31  | 405.63  | 780.94   |
| 0.27 | 164147.79   | 317473.56    | 579829.18    | 1231606.56   | 0.68 | 116.57  | 205.08  | 339.04  | 638.51   |
| 0.28 | 130536.12   | 253157.36    | 458861.13    | 964948.73    | 0.69 | 98.56   | 171.49  | 287.96  | 546.54   |
| 0.29 | 103305.08   | 199201.40    | 363844.59    | 765353.17    | 0.70 | 82.91   | 146.47  | 243.39  | 449.69   |
| 0.30 | 82252.49    | 159530.14    | 290618.66    | 605422.59    | 0.71 | 70.40   | 122.81  | 202.92  | 371.98   |
| 0.31 | 66021.49    | 125458.27    | 229806.94    | 483473.15    | 0.72 | 59.56   | 103.47  | 168.16  | 308.99   |
| 0.32 | 53256.41    | 101882.42    | 186596.77    | 389382.46    | 0.73 | 50.10   | 86.89   | 141.13  | 251.78   |
| 0.33 | 43635.98    | 82481.63     | 151233.61    | 314380.43    | 0.74 | 42.06   | 71.72   | 116.27  | 205.18   |
| 0.34 | 35309.89    | 67124.98     | 122524.40    | 252716.50    | 0.75 | 35.42   | 60.23   | 97.12   | 171.75   |
| 0.35 | 28735.95    | 54852.37     | 99840.81     | 208351.71    | 0.76 | 29.85   | 50.56   | 80.47   | 140.88   |
| 0.36 | 23607.26    | 45096.16     | 81554.11     | 169722.17    | 0.77 | 24.77   | 41.67   | 65.98   | 114.50   |
| 0.37 | 19725.57    | 37086.47     | 66161.70     | 137300.01    | 0.78 | 20.67   | 34.73   | 54.83   | 96.18    |
| 0.38 | 16220.99    | 30650.27     | 54457.78     | 114236.49    | 0.79 | 16.84   | 28.31   | 44.52   | 75.12    |
| 0.39 | 13470.70    | 25331.55     | 45439.61     | 92709.78     | 0.80 | 14.01   | 23.05   | 35.51   | 59.90    |
| 0.40 | 11288.34    | 21101.45     | 37873.40     | 75856.70     | 0.81 | 11.47   | 18.86   | 28.81   | 48.14    |
| 0.41 | 9455.29     | 17436.97     | 32035.51     | 64774.36     | 0.82 | 9.34    | 15.37   | 23.22   | 38.77    |
| 0.42 | 7883.09     | 14663.66     | 26179.08     | 53604.52     | 0.83 | 7.67    | 12.23   | 18.57   | 30.33    |
| 0.43 | 6581.62     | 12254.12     | 21653.42     | 45616.60     | 0.84 | 6.20    | 9.92    | 14.94   | 24.16    |
| 0.44 | 5579.26     | 10386.43     | 18315.20     | 37908.07     | 0.85 | 4.90    | 7.86    | 11.62   | 18.72    |
| 0.45 | 4671.01     | 8792.41      | 15511.06     | 31450.57     | 0.86 | 3.87    | 6.14    | 9.14    | 14.31    |
| 0.46 | 3970.67     | 7404.30      | 12922.90     | 26047.60     | 0.87 | 2.97    | 4.70    | 6.88    | 10.72    |
| 0.47 | 3368.13     | 6234.16      | 10994.17     | 21441.63     | 0.88 | 2.28    | 3.57    | 5.23    | 8.02     |
| 0.48 | 2837.78     | 5334.90      | 9388.61      | 18814.51     | 0.89 | 1.72    | 2.69    | 3.91    | 5.91     |
| 0.49 | 2417.44     | 4467.48      | 7846.19      | 15792.77     | 0.90 | 1.27    | 1.96    | 2.81    | 4.25     |
| 0.50 | 2057.09     | 3803.62      | 6691.97      | 13145.85     |      |         |         |         |          |

Table S396: Critical values for detector  $\hat{H}_{mov,sn}^{m,0.1}$  with windows size  $n = 0.1$ , and FM-OLS and D-OLS estimation in a model with intercept and linear trend. The number of integrated regressors is 3 and the highest power of  $x_{kt}$  is 2.

| m    | 90 %         | 95 %         | 97,5 %        | 99 %          | m    | 90 %    | 95 %     | 97,5 %   | 99 %     |
|------|--------------|--------------|---------------|---------------|------|---------|----------|----------|----------|
| 0.10 | 300178548.89 | 617399068.48 | 1252129816.15 | 2856694103.23 | 0.51 | 7184.72 | 13747.32 | 25137.70 | 54667.32 |
| 0.11 | 169345202.54 | 358522117.80 | 710236106.71  | 1598681894.37 | 0.52 | 6113.20 | 11683.14 | 21178.57 | 46425.83 |
| 0.12 | 103003747.00 | 214205801.83 | 418545929.68  | 972305126.42  | 0.53 | 5237.31 | 9955.15  | 18059.48 | 38739.58 |
| 0.13 | 64469421.67  | 134138259.97 | 261285857.68  | 586099843.67  | 0.54 | 4483.80 | 8564.08  | 15562.83 | 32494.34 |
| 0.14 | 41255161.62  | 86246942.73  | 169146774.43  | 378972869.26  | 0.55 | 3820.77 | 7375.17  | 13201.16 | 27919.52 |
| 0.15 | 27332942.32  | 56738917.41  | 111378721.32  | 249945537.57  | 0.56 | 3267.08 | 6201.45  | 11345.19 | 22736.70 |
| 0.16 | 18357671.49  | 38708494.49  | 76232381.71   | 172863860.52  | 0.57 | 2782.32 | 5306.57  | 9508.96  | 19235.34 |
| 0.17 | 12767029.28  | 26524174.27  | 52777181.31   | 117970529.97  | 0.58 | 2381.21 | 4498.91  | 7965.79  | 16561.77 |
| 0.18 | 8973199.13   | 18529844.59  | 36997643.38   | 84289275.57   | 0.59 | 2016.63 | 3781.88  | 6866.61  | 14027.44 |
| 0.19 | 6408639.51   | 13370576.48  | 26612615.35   | 60438174.51   | 0.60 | 1718.38 | 3206.93  | 5827.22  | 11928.99 |
| 0.20 | 4646565.36   | 9559929.77   | 18900766.26   | 43441202.49   | 0.61 | 1463.99 | 2741.51  | 4874.01  | 10182.63 |
| 0.21 | 3419085.73   | 6980150.59   | 13553031.80   | 30979029.75   | 0.62 | 1254.50 | 2343.01  | 4171.46  | 8429.19  |
| 0.22 | 2553698.19   | 5246931.93   | 10175544.74   | 22740291.33   | 0.63 | 1075.71 | 2016.06  | 3557.48  | 7120.08  |
| 0.23 | 1924289.76   | 3928216.19   | 7804354.31    | 16774795.27   | 0.64 | 919.26  | 1696.23  | 2961.98  | 5881.58  |
| 0.24 | 1485317.30   | 3008443.52   | 5833046.14    | 12847373.62   | 0.65 | 776.95  | 1444.54  | 2493.08  | 5044.97  |
| 0.25 | 1137376.68   | 2292287.94   | 4446296.50    | 10022599.80   | 0.66 | 659.44  | 1213.84  | 2101.72  | 4201.86  |
| 0.26 | 890709.91    | 1801370.32   | 3464208.55    | 7701959.35    | 0.67 | 557.53  | 1020.81  | 1771.75  | 3515.15  |
| 0.27 | 697711.64    | 1415222.28   | 2731694.84    | 6142167.07    | 0.68 | 472.29  | 861.74   | 1497.04  | 2897.54  |
| 0.28 | 552063.05    | 1107027.62   | 2098277.68    | 4846504.41    | 0.69 | 396.87  | 725.07   | 1255.63  | 2406.33  |
| 0.29 | 438083.95    | 875902.17    | 1672194.21    | 3749843.59    | 0.70 | 335.13  | 608.77   | 1048.26  | 2031.95  |
| 0.30 | 351565.39    | 695797.06    | 1345606.65    | 2922133.47    | 0.71 | 284.86  | 508.61   | 875.34   | 1690.92  |
| 0.31 | 281310.17    | 566616.57    | 1081874.15    | 2354776.33    | 0.72 | 241.58  | 421.72   | 719.78   | 1412.14  |
| 0.32 | 226546.96    | 456001.44    | 867885.92     | 1924459.92    | 0.73 | 203.63  | 355.72   | 598.44   | 1162.33  |
| 0.33 | 182900.38    | 363572.64    | 697241.33     | 1549495.27    | 0.74 | 169.99  | 296.68   | 488.65   | 941.57   |
| 0.34 | 148408.13    | 297164.27    | 565894.92     | 1235136.99    | 0.75 | 142.90  | 246.66   | 399.63   | 766.63   |
| 0.35 | 122387.68    | 241401.98    | 451630.61     | 999528.95     | 0.76 | 119.59  | 207.08   | 333.21   | 616.03   |
| 0.36 | 100331.45    | 198445.54    | 372559.13     | 816691.04     | 0.77 | 100.47  | 170.60   | 278.78   | 497.41   |
| 0.37 | 83058.42     | 162066.17    | 305571.74     | 677834.37     | 0.78 | 83.39   | 141.65   | 228.78   | 410.28   |
| 0.38 | 68254.54     | 135336.67    | 252545.05     | 551197.89     | 0.79 | 68.79   | 116.52   | 185.28   | 329.53   |
| 0.39 | 56479.34     | 111282.61    | 206170.50     | 450026.90     | 0.80 | 56.70   | 95.09    | 150.31   | 267.98   |
| 0.40 | 47336.15     | 91575.28     | 170182.31     | 374794.25     | 0.81 | 46.19   | 77.29    | 121.14   | 214.21   |
| 0.41 | 39432.86     | 76176.38     | 142755.07     | 308825.68     | 0.82 | 37.59   | 62.10    | 98.00    | 173.17   |
| 0.42 | 32832.62     | 64430.72     | 119383.41     | 251673.10     | 0.83 | 30.48   | 49.94    | 78.37    | 135.60   |
| 0.43 | 27581.33     | 53305.12     | 99348.52      | 214357.27     | 0.84 | 24.58   | 40.25    | 61.86    | 105.97   |
| 0.44 | 22989.62     | 44753.91     | 82831.81      | 182403.82     | 0.85 | 19.68   | 31.85    | 48.73    | 83.46    |
| 0.45 | 19519.34     | 38092.04     | 69986.78      | 151842.63     | 0.86 | 15.69   | 25.09    | 38.11    | 62.71    |
| 0.46 | 16549.83     | 32137.59     | 59168.40      | 126255.03     | 0.87 | 12.33   | 19.49    | 29.16    | 48.00    |
| 0.47 | 14200.47     | 27202.58     | 49178.25      | 105627.84     | 0.88 | 9.61    | 15.11    | 22.18    | 35.54    |
| 0.48 | 11975.48     | 22997.49     | 41624.03      | 88296.31      | 0.89 | 7.39    | 11.50    | 16.57    | 25.95    |
| 0.49 | 10050.85     | 19364.33     | 35333.48      | 76097.60      | 0.90 | 5.61    | 8.59     | 12.35    | 18.64    |
| 0.50 | 8474.34      | 16361.34     | 29906.17      | 63165.45      |      |         |          |          |          |

Table S397: Critical values for detector  $\hat{H}_{mov,sn}^{m,0.1}$  with windows size  $n = 0.1$ , and IM-OLS estimation in a model with intercept and linear trend. The number of integrated regressors is 3 and the highest power of  $x_{kt}$  is 2.

| m    | 90 %        | 95 %         | 97,5 %       | 99 %         | m    | 90 %    | 95 %    | 97,5 %  | 99 %     |
|------|-------------|--------------|--------------|--------------|------|---------|---------|---------|----------|
| 0.10 | 90295363.39 | 179069913.67 | 346856214.94 | 744629818.94 | 0.51 | 2460.00 | 4505.05 | 7870.20 | 15815.63 |
| 0.11 | 52315040.52 | 103702543.37 | 196426301.04 | 438774929.78 | 0.52 | 2075.73 | 3811.05 | 6525.11 | 13131.65 |
| 0.12 | 32124572.70 | 63016736.28  | 118889164.80 | 264419973.82 | 0.53 | 1762.49 | 3255.86 | 5560.03 | 10973.46 |
| 0.13 | 20098572.90 | 39675918.12  | 74518308.11  | 156544417.27 | 0.54 | 1502.52 | 2766.78 | 4718.33 | 9341.94  |
| 0.14 | 13077220.56 | 25817207.49  | 47668651.07  | 102449966.21 | 0.55 | 1284.96 | 2333.61 | 3973.18 | 7597.34  |
| 0.15 | 8792994.98  | 17299142.04  | 32293913.58  | 68259771.85  | 0.56 | 1090.92 | 1954.73 | 3343.76 | 6399.08  |
| 0.16 | 6019549.25  | 11967055.07  | 22099564.55  | 46036618.56  | 0.57 | 930.18  | 1663.58 | 2835.20 | 5381.89  |
| 0.17 | 4215788.69  | 8259783.63   | 15261513.92  | 32290333.12  | 0.58 | 787.47  | 1415.73 | 2422.71 | 4496.12  |
| 0.18 | 2979313.87  | 5784287.75   | 10751175.78  | 23290344.47  | 0.59 | 670.89  | 1194.14 | 2017.73 | 3784.50  |
| 0.19 | 2132516.05  | 4166576.09   | 7728415.92   | 16632814.97  | 0.60 | 571.29  | 1019.68 | 1722.48 | 3226.93  |
| 0.20 | 1566793.50  | 3069368.57   | 5661552.93   | 11953390.55  | 0.61 | 484.08  | 871.39  | 1456.09 | 2766.56  |
| 0.21 | 1158995.97  | 2261772.26   | 4160983.94   | 8947643.85   | 0.62 | 409.68  | 740.56  | 1236.00 | 2336.55  |
| 0.22 | 865607.10   | 1673521.33   | 3065821.37   | 6678062.04   | 0.63 | 349.53  | 625.74  | 1042.45 | 1955.21  |
| 0.23 | 668701.90   | 1303747.66   | 2352860.74   | 5010604.51   | 0.64 | 295.08  | 532.22  | 875.54  | 1653.33  |
| 0.24 | 509572.66   | 995991.88    | 1796995.07   | 3813036.77   | 0.65 | 250.02  | 439.37  | 745.58  | 1394.83  |
| 0.25 | 394573.91   | 763781.91    | 1394454.09   | 2910184.37   | 0.66 | 209.78  | 370.65  | 617.71  | 1150.92  |
| 0.26 | 307264.88   | 598592.33    | 1081852.25   | 2279660.41   | 0.67 | 178.21  | 310.67  | 517.20  | 979.93   |
| 0.27 | 238449.14   | 461792.07    | 840840.10    | 1796570.86   | 0.68 | 149.18  | 260.32  | 425.45  | 791.27   |
| 0.28 | 190355.66   | 369011.17    | 666728.73    | 1399071.76   | 0.69 | 124.36  | 216.20  | 358.18  | 674.39   |
| 0.29 | 151310.76   | 289484.07    | 527747.73    | 1112925.87   | 0.70 | 103.77  | 182.57  | 299.27  | 545.26   |
| 0.30 | 120223.15   | 232562.51    | 423524.01    | 879212.80    | 0.71 | 87.87   | 151.57  | 247.06  | 453.08   |
| 0.31 | 96302.99    | 183482.44    | 332396.22    | 709057.80    | 0.72 | 73.43   | 126.74  | 203.55  | 366.95   |
| 0.32 | 77795.08    | 148680.60    | 270123.29    | 564423.28    | 0.73 | 61.14   | 104.82  | 168.28  | 298.51   |
| 0.33 | 63772.63    | 120369.54    | 218750.09    | 451965.90    | 0.74 | 50.81   | 85.97   | 137.37  | 238.85   |
| 0.34 | 51549.24    | 97729.85     | 178300.70    | 367352.96    | 0.75 | 42.20   | 71.06   | 113.05  | 197.38   |
| 0.35 | 42007.24    | 79863.47     | 145136.36    | 302963.54    | 0.76 | 35.07   | 59.03   | 93.20   | 161.44   |
| 0.36 | 34486.60    | 65750.29     | 118170.74    | 247456.08    | 0.77 | 28.71   | 48.16   | 75.38   | 128.72   |
| 0.37 | 28760.31    | 53856.34     | 95782.77     | 199272.21    | 0.78 | 23.77   | 39.47   | 61.96   | 106.57   |
| 0.38 | 23641.33    | 44394.52     | 78600.08     | 163820.08    | 0.79 | 19.00   | 31.85   | 49.76   | 82.56    |
| 0.39 | 19612.50    | 36745.36     | 65522.28     | 132739.82    | 0.80 | 15.62   | 25.55   | 38.92   | 64.78    |
| 0.40 | 16347.25    | 30454.66     | 54552.27     | 108985.49    | 0.81 | 12.57   | 20.53   | 31.23   | 51.86    |
| 0.41 | 13661.28    | 25162.81     | 46078.74     | 92349.91     | 0.82 | 10.13   | 16.54   | 24.87   | 41.06    |
| 0.42 | 11418.38    | 21197.46     | 37503.02     | 76691.57     | 0.83 | 8.23    | 13.04   | 19.58   | 31.78    |
| 0.43 | 9488.88     | 17596.28     | 31042.47     | 64911.79     | 0.84 | 6.55    | 10.43   | 15.64   | 25.16    |
| 0.44 | 8005.61     | 14931.99     | 26341.86     | 53424.70     | 0.85 | 5.13    | 8.17    | 12.02   | 19.27    |
| 0.45 | 6687.51     | 12629.02     | 22057.89     | 43509.88     | 0.86 | 4.02    | 6.34    | 9.37    | 14.61    |
| 0.46 | 5678.99     | 10650.72     | 18481.83     | 37370.92     | 0.87 | 3.08    | 4.82    | 7.02    | 10.91    |
| 0.47 | 4806.53     | 8910.97      | 15700.21     | 30160.37     | 0.88 | 2.38    | 3.66    | 5.34    | 8.12     |
| 0.48 | 4038.32     | 7578.26      | 13296.07     | 26381.54     | 0.89 | 1.81    | 2.77    | 4.00    | 6.00     |
| 0.49 | 3438.55     | 6310.28      | 11028.44     | 22134.37     | 0.90 | 1.37    | 2.05    | 2.91    | 4.33     |
| 0.50 | 2910.08     | 5350.91      | 9404.34      | 18502.37     |      |         |         |         |          |

Table S398: Critical values for detector  $\hat{H}_{mov,sn}^{m,0.2}$  with windows size  $n = 0.2$ , and FM-OLS and D-OLS estimation in a model with intercept and linear trend. The number of integrated regressors is 3 and the highest power of  $x_{kt}$  is 2.

| m    | 90 %         | 95 %         | 97,5 %        | 99 %          | m    | 90 %     | 95 %     | 97,5 %   | 99 %     |
|------|--------------|--------------|---------------|---------------|------|----------|----------|----------|----------|
| 0.10 | 398024813.33 | 822106536.38 | 1672495794.24 | 3800285930.30 | 0.51 | 10069.52 | 19204.51 | 34611.50 | 75070.50 |
| 0.11 | 227853355.20 | 481402725.99 | 948950446.88  | 2143670655.27 | 0.52 | 8572.52  | 16282.69 | 29439.49 | 63844.64 |
| 0.12 | 139657409.85 | 292247877.84 | 564479677.75  | 1310067127.72 | 0.53 | 7318.03  | 13822.77 | 25127.14 | 52984.90 |
| 0.13 | 88645455.72  | 182497568.76 | 357967891.08  | 802989575.07  | 0.54 | 6254.37  | 11796.17 | 21203.67 | 44580.18 |
| 0.14 | 57011472.95  | 118440600.56 | 233325416.11  | 535026565.85  | 0.55 | 5285.84  | 10090.05 | 18010.07 | 37717.67 |
| 0.15 | 38167452.81  | 79165752.35  | 153881993.10  | 356693211.96  | 0.56 | 4505.56  | 8529.29  | 15438.77 | 30676.22 |
| 0.16 | 25793513.58  | 53878504.19  | 106030410.65  | 243006578.21  | 0.57 | 3816.48  | 7228.40  | 12836.29 | 26044.27 |
| 0.17 | 17900374.67  | 37221018.71  | 73769914.29   | 166138595.45  | 0.58 | 3241.14  | 6090.22  | 10769.91 | 22026.87 |
| 0.18 | 12666694.39  | 26108934.25  | 51655734.12   | 118535454.59  | 0.59 | 2733.00  | 5096.02  | 9176.87  | 18667.31 |
| 0.19 | 9093564.19   | 18868343.26  | 37549741.78   | 85919583.38   | 0.60 | 2326.22  | 4307.20  | 7714.17  | 15846.99 |
| 0.20 | 6640065.00   | 13633342.51  | 27038516.38   | 62044483.43   | 0.61 | 1960.14  | 3669.25  | 6417.66  | 13351.22 |
| 0.21 | 4883105.63   | 9927070.71   | 19332150.97   | 43530209.39   | 0.62 | 1669.71  | 3112.10  | 5492.02  | 11035.53 |
| 0.22 | 3660702.90   | 7525892.44   | 14527252.02   | 32734653.14   | 0.63 | 1427.79  | 2636.94  | 4619.52  | 9201.68  |
| 0.23 | 2778853.93   | 5628833.07   | 11241862.21   | 24211839.35   | 0.64 | 1212.78  | 2216.05  | 3849.30  | 7642.35  |
| 0.24 | 2146669.71   | 4330882.11   | 8282272.06    | 18566021.93   | 0.65 | 1017.60  | 1880.60  | 3206.55  | 6301.23  |
| 0.25 | 1643174.58   | 3320198.89   | 6363852.50    | 14461824.01   | 0.66 | 858.12   | 1566.31  | 2668.01  | 5354.60  |
| 0.26 | 1293973.87   | 2598919.03   | 4957243.60    | 11221359.22   | 0.67 | 719.43   | 1306.11  | 2247.09  | 4393.38  |
| 0.27 | 1010205.63   | 2041374.00   | 3922508.44    | 8901746.54    | 0.68 | 602.47   | 1091.69  | 1875.34  | 3602.69  |
| 0.28 | 802227.26    | 1601564.49   | 3045772.89    | 6978243.27    | 0.69 | 502.75   | 912.12   | 1558.49  | 2996.69  |
| 0.29 | 635636.74    | 1272460.03   | 2416787.76    | 5444319.96    | 0.70 | 421.33   | 756.79   | 1287.78  | 2477.73  |
| 0.30 | 510756.20    | 1014990.65   | 1939382.69    | 4233837.05    | 0.71 | 355.07   | 629.14   | 1065.65  | 2037.31  |
| 0.31 | 409779.81    | 824209.84    | 1562231.03    | 3399167.71    | 0.72 | 297.44   | 515.63   | 865.27   | 1691.12  |
| 0.32 | 329085.34    | 657027.72    | 1254293.53    | 2755072.76    | 0.73 | 248.56   | 429.54   | 714.63   | 1363.80  |
| 0.33 | 266461.54    | 529017.96    | 1007658.57    | 2218700.92    | 0.74 | 206.15   | 355.09   | 577.56   | 1093.85  |
| 0.34 | 216308.92    | 431140.44    | 821853.77     | 1788741.11    | 0.75 | 170.89   | 292.34   | 468.62   | 884.04   |
| 0.35 | 177636.65    | 350204.31    | 653945.90     | 1446369.05    | 0.76 | 141.08   | 242.88   | 383.42   | 702.60   |
| 0.36 | 145299.31    | 286172.60    | 532122.26     | 1176822.52    | 0.77 | 117.33   | 197.06   | 316.65   | 565.14   |
| 0.37 | 120349.88    | 235300.86    | 441486.30     | 971838.13     | 0.78 | 96.47    | 161.66   | 258.78   | 459.04   |
| 0.38 | 98696.63     | 196013.80    | 362444.40     | 790697.16     | 0.79 | 78.74    | 131.27   | 206.55   | 367.16   |
| 0.39 | 82003.54     | 160242.34    | 295422.47     | 636151.09     | 0.80 | 63.92    | 105.67   | 165.76   | 294.86   |
| 0.40 | 68496.07     | 131323.92    | 245806.99     | 534177.89     | 0.81 | 51.31    | 84.90    | 131.86   | 231.36   |
| 0.41 | 57070.57     | 109440.81    | 205134.20     | 444809.25     | 0.82 | 41.28    | 67.47    | 105.11   | 183.43   |
| 0.42 | 47347.97     | 92291.43     | 170257.93     | 359642.92     | 0.83 | 32.95    | 53.58    | 83.28    | 143.01   |
| 0.43 | 39695.45     | 76705.33     | 140891.56     | 304747.44     | 0.84 | 26.31    | 42.63    | 65.06    | 110.66   |
| 0.44 | 32959.93     | 64131.68     | 117816.95     | 259417.47     | 0.85 | 20.77    | 33.33    | 50.61    | 86.37    |
| 0.45 | 27944.51     | 54129.53     | 99480.39      | 213572.83     | 0.86 | 16.38    | 26.01    | 39.28    | 64.40    |
| 0.46 | 23596.10     | 45408.89     | 83469.24      | 174871.33     | 0.87 | 12.78    | 20.04    | 29.86    | 48.72    |
| 0.47 | 20235.82     | 38332.05     | 69214.31      | 149134.58     | 0.88 | 9.85     | 15.39    | 22.57    | 35.94    |
| 0.48 | 16967.75     | 32360.07     | 58515.21      | 124689.92     | 0.89 | 7.56     | 11.68    | 16.76    | 26.20    |
| 0.49 | 14264.42     | 27226.36     | 49510.95      | 105089.31     | 0.90 | 5.72     | 8.71     | 12.48    | 18.74    |
| 0.50 | 11949.86     | 22946.78     | 41579.69      | 88369.06      |      |          |          |          |          |

Table S399: Critical values for detector  $\hat{H}_{mov,sn}^{m,0.2}$  with windows size  $n = 0.2$ , and IM-OLS estimation in a model with intercept and linear trend. The number of integrated regressors is 3 and the highest power of  $x_{kt}$  is 2.



| m    | 90 %        | 95 %         | 97,5 %       | 99 %         | m    | 90 %    | 95 %    | 97,5 %  | 99 %     |
|------|-------------|--------------|--------------|--------------|------|---------|---------|---------|----------|
| 0.10 | 99422334.53 | 197296593.08 | 382539150.01 | 829498023.40 | 0.51 | 2694.20 | 4925.85 | 8548.26 | 17103.83 |
| 0.11 | 57825809.00 | 114106670.37 | 216063222.56 | 477056744.96 | 0.52 | 2274.98 | 4150.12 | 7058.79 | 14186.87 |
| 0.12 | 35666927.42 | 69815366.34  | 131698224.94 | 292375744.30 | 0.53 | 1919.10 | 3523.64 | 6012.28 | 11807.33 |
| 0.13 | 22413041.76 | 44061797.14  | 82729543.16  | 173865501.89 | 0.54 | 1630.05 | 2996.60 | 5089.27 | 9971.24  |
| 0.14 | 14619716.87 | 28779551.69  | 53210434.99  | 112841707.94 | 0.55 | 1388.28 | 2515.96 | 4274.82 | 8161.69  |
| 0.15 | 9877230.80  | 19446043.12  | 36216702.70  | 77092626.26  | 0.56 | 1176.66 | 2097.46 | 3578.56 | 6818.18  |
| 0.16 | 6783188.06  | 13428718.36  | 24765777.98  | 51514968.23  | 0.57 | 998.62  | 1779.16 | 3012.62 | 5694.82  |
| 0.17 | 4738222.60  | 9287444.32   | 17043563.92  | 35963638.71  | 0.58 | 842.78  | 1507.92 | 2564.23 | 4773.21  |
| 0.18 | 3370568.62  | 6510085.62   | 12110571.59  | 26015601.53  | 0.59 | 716.45  | 1271.26 | 2146.10 | 4000.59  |
| 0.19 | 2416925.77  | 4696059.96   | 8673947.58   | 18680823.64  | 0.60 | 606.42  | 1078.67 | 1809.50 | 3401.73  |
| 0.20 | 1770066.15  | 3457398.38   | 6331238.92   | 13370172.71  | 0.61 | 512.63  | 919.40  | 1530.57 | 2900.28  |
| 0.21 | 1315252.70  | 2556659.07   | 4695769.98   | 10021123.50  | 0.62 | 432.38  | 779.70  | 1290.64 | 2428.98  |
| 0.22 | 981363.81   | 1900087.41   | 3470056.70   | 7515779.04   | 0.63 | 367.39  | 654.82  | 1088.59 | 2032.23  |
| 0.23 | 760057.91   | 1471689.65   | 2654125.25   | 5648014.95   | 0.64 | 308.74  | 554.66  | 909.13  | 1699.55  |
| 0.24 | 579289.55   | 1128438.74   | 2035680.69   | 4265378.29   | 0.65 | 260.68  | 456.42  | 770.56  | 1440.94  |
| 0.25 | 448922.99   | 862331.44    | 1575458.92   | 3287728.41   | 0.66 | 217.35  | 383.07  | 637.02  | 1177.04  |
| 0.26 | 349045.27   | 674145.12    | 1227802.01   | 2556685.19   | 0.67 | 184.01  | 320.23  | 531.03  | 996.74   |
| 0.27 | 269832.36   | 523626.92    | 951553.72    | 2031582.61   | 0.68 | 153.65  | 268.16  | 435.34  | 807.65   |
| 0.28 | 216737.73   | 419864.42    | 755113.02    | 1577261.97   | 0.69 | 127.68  | 220.67  | 365.17  | 687.75   |
| 0.29 | 171357.16   | 328798.89    | 592720.78    | 1248811.54   | 0.70 | 106.10  | 185.93  | 303.34  | 555.17   |
| 0.30 | 136942.17   | 264386.77    | 479703.27    | 1000118.98   | 0.71 | 89.54   | 154.00  | 250.42  | 457.96   |
| 0.31 | 109331.68   | 207366.17    | 376799.56    | 791695.98    | 0.72 | 74.52   | 128.47  | 205.75  | 371.09   |
| 0.32 | 88207.00    | 168834.29    | 304248.87    | 633710.35    | 0.73 | 61.84   | 105.78  | 169.88  | 300.70   |
| 0.33 | 72265.62    | 135894.49    | 245537.14    | 510257.63    | 0.74 | 51.25   | 86.61   | 138.12  | 240.27   |
| 0.34 | 58237.94    | 110392.86    | 200207.37    | 410841.62    | 0.75 | 42.49   | 71.49   | 113.50  | 198.30   |
| 0.35 | 47534.37    | 90116.59     | 163115.77    | 340864.98    | 0.76 | 35.27   | 59.24   | 93.46   | 161.59   |
| 0.36 | 38968.74    | 73913.19     | 132364.22    | 279849.03    | 0.77 | 28.85   | 48.31   | 75.58   | 128.92   |
| 0.37 | 32364.24    | 60651.62     | 107590.37    | 222956.09    | 0.78 | 23.87   | 39.58   | 62.09   | 106.62   |
| 0.38 | 26637.21    | 49760.54     | 87578.18     | 182905.41    | 0.79 | 19.10   | 31.95   | 49.84   | 82.66    |
| 0.39 | 22030.66    | 41075.31     | 73327.56     | 148243.36    | 0.80 | 15.73   | 25.67   | 39.00   | 64.84    |
| 0.40 | 18360.89    | 33897.50     | 60801.63     | 120807.69    | 0.81 | 12.68   | 20.67   | 31.37   | 51.98    |
| 0.41 | 15311.38    | 28073.11     | 51221.09     | 102581.73    | 0.82 | 10.26   | 16.65   | 24.99   | 41.18    |
| 0.42 | 12783.71    | 23589.80     | 41785.48     | 84794.88     | 0.83 | 8.35    | 13.13   | 19.72   | 31.92    |
| 0.43 | 10603.75    | 19575.95     | 34545.49     | 71538.64     | 0.84 | 6.66    | 10.56   | 15.77   | 25.29    |
| 0.44 | 8906.02     | 16555.10     | 29248.24     | 58704.51     | 0.85 | 5.24    | 8.28    | 12.14   | 19.39    |
| 0.45 | 7434.45     | 13983.40     | 24272.03     | 47672.96     | 0.86 | 4.14    | 6.46    | 9.51    | 14.76    |
| 0.46 | 6304.25     | 11762.43     | 20410.51     | 40664.16     | 0.87 | 3.19    | 4.94    | 7.15    | 11.03    |
| 0.47 | 5305.08     | 9807.05      | 17237.50     | 32929.71     | 0.88 | 2.49    | 3.78    | 5.45    | 8.24     |
| 0.48 | 4448.50     | 8349.79      | 14620.45     | 28698.37     | 0.89 | 1.93    | 2.89    | 4.11    | 6.14     |
| 0.49 | 3777.98     | 6920.87      | 12064.86     | 24348.90     | 0.90 | 1.48    | 2.17    | 3.02    | 4.45     |
| 0.50 | 3197.81     | 5874.19      | 10248.89     | 20032.13     |      |         |         |         |          |

Table S400: Critical values for detector  $\hat{H}_{mov,sn}^{m,0.3}$  with windows size  $n = 0.3$ , and FM-OLS and D-OLS estimation in a model with intercept and linear trend. The number of integrated regressors is 3 and the highest power of  $x_{kt}$  is 2.

| m    | 90 %         | 95 %         | 97,5 %        | 99 %          | m    | 90 %     | 95 %     | 97,5 %   | 99 %     |
|------|--------------|--------------|---------------|---------------|------|----------|----------|----------|----------|
| 0.10 | 439062628.09 | 904369980.95 | 1824298932.51 | 4175996274.27 | 0.51 | 11036.81 | 20938.47 | 37765.07 | 80917.02 |
| 0.11 | 250673243.40 | 530707297.67 | 1047287247.43 | 2359210223.42 | 0.52 | 9344.34  | 17685.61 | 31809.84 | 68326.45 |
| 0.12 | 154031104.65 | 320768654.23 | 624515394.92  | 1452067625.76 | 0.53 | 7975.86  | 14995.82 | 27070.74 | 56664.04 |
| 0.13 | 98874206.69  | 201938004.14 | 396511411.33  | 894143391.83  | 0.54 | 6764.62  | 12713.14 | 22771.52 | 47272.33 |
| 0.14 | 63543041.40  | 131219886.47 | 258482704.98  | 601028674.24  | 0.55 | 5728.10  | 10871.79 | 19284.67 | 39668.29 |
| 0.15 | 42780700.35  | 87936237.60  | 171148924.81  | 397984934.74  | 0.56 | 4854.16  | 9164.35  | 16489.43 | 32447.42 |
| 0.16 | 28897390.80  | 59827552.50  | 118249491.68  | 271070318.70  | 0.57 | 4102.34  | 7716.63  | 13612.28 | 27420.30 |
| 0.17 | 20054041.83  | 41719362.85  | 82530502.44   | 186407369.19  | 0.58 | 3454.10  | 6489.97  | 11391.47 | 23315.49 |
| 0.18 | 14306017.63  | 29383223.32  | 57561665.56   | 132128897.78  | 0.59 | 2917.17  | 5424.08  | 9728.87  | 19607.03 |
| 0.19 | 10258058.03  | 21038315.19  | 41960985.84   | 95417200.00   | 0.60 | 2467.11  | 4566.00  | 8117.16  | 16581.01 |
| 0.20 | 7499368.09   | 15273670.21  | 30368805.56   | 69039348.24   | 0.61 | 2074.03  | 3853.11  | 6714.33  | 13911.07 |
| 0.21 | 5537873.68   | 11199147.60  | 21548383.93   | 49130665.86   | 0.62 | 1762.88  | 3257.80  | 5742.61  | 11493.82 |
| 0.22 | 4133551.69   | 8448534.26   | 16359279.79   | 36817646.18   | 0.63 | 1501.52  | 2760.36  | 4819.18  | 9529.47  |
| 0.23 | 3149948.41   | 6344833.18   | 12571095.13   | 27287881.84   | 0.64 | 1267.97  | 2304.54  | 3995.01  | 7861.27  |
| 0.24 | 2427637.27   | 4881031.82   | 9301867.50    | 20801623.10   | 0.65 | 1060.91  | 1953.51  | 3317.06  | 6511.81  |
| 0.25 | 1860691.41   | 3764760.63   | 7205548.63    | 16188597.88   | 0.66 | 889.62   | 1626.26  | 2745.65  | 5479.83  |
| 0.26 | 1461788.00   | 2925025.96   | 5602144.50    | 12583709.19   | 0.67 | 744.08   | 1343.49  | 2304.24  | 4493.34  |
| 0.27 | 1143315.47   | 2307679.67   | 4440012.68    | 10022599.47   | 0.68 | 621.68   | 1122.12  | 1919.86  | 3678.37  |
| 0.28 | 912002.57    | 1804305.17   | 3429906.93    | 7830753.62    | 0.69 | 516.87   | 933.12   | 1588.05  | 3054.44  |
| 0.29 | 723013.96    | 1430972.17   | 2724025.43    | 6134724.02    | 0.70 | 430.81   | 772.42   | 1307.31  | 2528.81  |
| 0.30 | 576755.91    | 1144193.89   | 2187014.44    | 4790692.25    | 0.71 | 361.76   | 641.14   | 1081.49  | 2064.38  |
| 0.31 | 464781.82    | 934298.10    | 1763748.74    | 3803855.23    | 0.72 | 302.18   | 522.43   | 877.21   | 1705.74  |
| 0.32 | 371421.92    | 743157.49    | 1413568.30    | 3098278.30    | 0.73 | 251.38   | 433.90   | 720.32   | 1372.82  |
| 0.33 | 300327.98    | 596539.31    | 1134099.42    | 2499115.42    | 0.74 | 208.05   | 357.65   | 580.60   | 1098.59  |
| 0.34 | 245075.15    | 484664.61    | 919179.90     | 1993311.21    | 0.75 | 172.28   | 294.00   | 470.94   | 887.95   |
| 0.35 | 200301.44    | 393352.70    | 729855.83     | 1609510.82    | 0.76 | 141.97   | 243.72   | 385.21   | 705.39   |
| 0.36 | 163789.03    | 321030.29    | 599159.87     | 1312570.32    | 0.77 | 117.77   | 197.69   | 317.16   | 566.35   |
| 0.37 | 135098.53    | 262800.93    | 492092.06     | 1085465.74    | 0.78 | 96.74    | 161.94   | 259.29   | 459.74   |
| 0.38 | 111052.22    | 219270.90    | 403632.05     | 882288.45     | 0.79 | 78.91    | 131.55   | 206.73   | 367.36   |
| 0.39 | 91914.17     | 179322.79    | 327717.47     | 708176.76     | 0.80 | 64.04    | 105.77   | 165.93   | 294.97   |
| 0.40 | 76452.06     | 147197.52    | 272191.78     | 591931.56     | 0.81 | 51.43    | 85.01    | 131.97   | 231.42   |
| 0.41 | 63820.29     | 122136.82    | 227494.44     | 490201.74     | 0.82 | 41.41    | 67.58    | 105.20   | 183.59   |
| 0.42 | 52928.08     | 102537.76    | 187917.52     | 400312.59     | 0.83 | 33.07    | 53.71    | 83.38    | 143.09   |
| 0.43 | 44194.81     | 85019.31     | 155977.89     | 336686.28     | 0.84 | 26.41    | 42.71    | 65.16    | 110.74   |
| 0.44 | 36748.65     | 71348.67     | 130723.02     | 283364.92     | 0.85 | 20.87    | 33.44    | 50.72    | 86.51    |
| 0.45 | 31026.11     | 60021.80     | 109706.55     | 235032.97     | 0.86 | 16.51    | 26.12    | 39.41    | 64.57    |
| 0.46 | 26165.75     | 50333.47     | 91160.63      | 191291.92     | 0.87 | 12.89    | 20.15    | 29.96    | 48.83    |
| 0.47 | 22345.09     | 42248.42     | 76023.93      | 163267.76     | 0.88 | 9.97     | 15.50    | 22.67    | 36.05    |
| 0.48 | 18714.03     | 35453.33     | 64116.18      | 136275.42     | 0.89 | 7.68     | 11.79    | 16.87    | 26.29    |
| 0.49 | 15668.12     | 29882.40     | 54004.88      | 114751.60     | 0.90 | 5.83     | 8.82     | 12.59    | 18.87    |
| 0.50 | 13091.38     | 25065.43     | 45242.07      | 95641.20      |      |          |          |          |          |

Table S401: Critical values for detector  $\hat{H}_{mov,sn}^{m,0.3}$  with windows size  $n = 0.3$ , and IM-OLS estimation in a model with intercept and linear trend. The number of integrated regressors is 3 and the highest power of  $x_{kt}$  is 2.

| m    | 90 %          | 95 %          | 97,5 %         | 99 %           | m    | 90 %    | 95 %     | 97,5 %   | 99 %      |
|------|---------------|---------------|----------------|----------------|------|---------|----------|----------|-----------|
| 0.10 | 1712784529.15 | 6326777235.17 | 18127800762.26 | 61104461431.55 | 0.51 | 6067.67 | 21201.64 | 61363.36 | 190669.57 |
| 0.11 | 918236076.41  | 3370139658.29 | 9855136344.57  | 33373897667.09 | 0.52 | 4927.96 | 17224.98 | 49189.11 | 148113.34 |
| 0.12 | 518577206.89  | 1879432293.23 | 5526142164.16  | 17712129095.53 | 0.53 | 4012.54 | 13849.85 | 39444.21 | 120799.70 |
| 0.13 | 306187996.06  | 1099763817.82 | 3292471345.28  | 10405669249.35 | 0.54 | 3235.73 | 11108.25 | 32203.25 | 102336.58 |
| 0.14 | 181778484.90  | 663379431.66  | 1980514554.77  | 6368515950.35  | 0.55 | 2667.37 | 9038.82  | 26168.66 | 82169.47  |
| 0.15 | 112710590.95  | 411709750.99  | 1225075648.79  | 4035513638.64  | 0.56 | 2184.12 | 7457.83  | 20678.54 | 64849.46  |
| 0.16 | 72627587.59   | 268263622.73  | 761724479.98   | 2560233709.65  | 0.57 | 1825.84 | 6155.87  | 17102.61 | 53258.57  |
| 0.17 | 47291653.31   | 176135987.90  | 487493179.48   | 1665124336.75  | 0.58 | 1499.89 | 4976.76  | 14147.05 | 45817.50  |
| 0.18 | 32292602.65   | 117964146.99  | 339280915.16   | 1108988856.95  | 0.59 | 1215.97 | 4150.85  | 11378.08 | 35957.90  |
| 0.19 | 22065438.88   | 79018653.15   | 226406026.20   | 781220897.84   | 0.60 | 991.93  | 3300.91  | 9326.43  | 28952.05  |
| 0.20 | 15218752.66   | 54963685.10   | 158534000.44   | 511701657.75   | 0.61 | 814.03  | 2751.67  | 7746.54  | 24940.11  |
| 0.21 | 10689828.12   | 38739716.56   | 114529985.49   | 366969411.33   | 0.62 | 678.12  | 2252.80  | 6279.85  | 19826.46  |
| 0.22 | 7509009.80    | 27409423.17   | 78744024.49    | 264112344.09   | 0.63 | 552.92  | 1823.02  | 4924.52  | 15242.62  |
| 0.23 | 5366810.88    | 20193114.38   | 58583417.82    | 192253658.13   | 0.64 | 448.20  | 1469.98  | 4069.46  | 12352.97  |
| 0.24 | 3901036.16    | 14709385.83   | 42713760.46    | 136384756.29   | 0.65 | 366.27  | 1177.20  | 3185.89  | 9828.61   |
| 0.25 | 2899097.05    | 10708993.58   | 31890836.41    | 102285548.46   | 0.66 | 294.17  | 952.97   | 2558.94  | 7620.86   |
| 0.26 | 2165307.18    | 7899375.99    | 23105864.65    | 75587311.75    | 0.67 | 242.03  | 768.44   | 2015.50  | 6420.07   |
| 0.27 | 1596884.72    | 5936426.05    | 17397279.24    | 57414648.77    | 0.68 | 197.98  | 611.59   | 1631.70  | 4792.89   |
| 0.28 | 1212538.51    | 4411603.97    | 12893326.81    | 41936300.95    | 0.69 | 159.51  | 492.21   | 1282.70  | 3783.15   |
| 0.29 | 911410.24     | 3356001.23    | 9640597.52     | 31205550.90    | 0.70 | 130.84  | 399.20   | 1034.29  | 3051.54   |
| 0.30 | 697350.36     | 2587424.10    | 7499152.59     | 23203915.05    | 0.71 | 104.82  | 321.21   | 811.91   | 2436.04   |
| 0.31 | 538806.54     | 1932356.09    | 5680708.70     | 18250056.52    | 0.72 | 86.59   | 257.24   | 657.47   | 1948.70   |
| 0.32 | 413540.11     | 1509470.00    | 4441812.97     | 14646608.41    | 0.73 | 70.22   | 205.54   | 538.90   | 1567.50   |
| 0.33 | 326919.82     | 1151207.84    | 3459568.35     | 11288963.22    | 0.74 | 56.54   | 162.87   | 413.73   | 1210.66   |
| 0.34 | 252792.82     | 904281.69     | 2655564.83     | 8793796.05     | 0.75 | 45.65   | 128.34   | 329.63   | 937.05    |
| 0.35 | 199064.97     | 715212.39     | 2063690.87     | 6717025.36     | 0.76 | 37.35   | 102.77   | 256.65   | 738.55    |
| 0.36 | 156136.50     | 572781.96     | 1659440.81     | 5387271.28     | 0.77 | 29.77   | 81.57    | 195.82   | 568.44    |
| 0.37 | 125255.59     | 450320.76     | 1317313.20     | 4175634.53     | 0.78 | 24.11   | 64.00    | 154.42   | 419.62    |
| 0.38 | 97547.28      | 354332.80     | 1041159.45     | 3330394.87     | 0.79 | 18.95   | 49.59    | 118.93   | 323.59    |
| 0.39 | 78521.88      | 279067.26     | 807187.69      | 2601868.39     | 0.80 | 15.26   | 38.55    | 90.80    | 243.80    |
| 0.40 | 63652.82      | 221323.37     | 644486.09      | 2094920.39     | 0.81 | 12.12   | 29.82    | 69.11    | 183.04    |
| 0.41 | 50561.28      | 179063.55     | 514673.25      | 1576544.77     | 0.82 | 9.48    | 22.61    | 51.91    | 139.48    |
| 0.42 | 40641.88      | 146291.79     | 412141.20      | 1277830.17     | 0.83 | 7.47    | 17.12    | 39.87    | 101.49    |
| 0.43 | 32250.40      | 118568.53     | 329563.11      | 1009120.30     | 0.84 | 5.86    | 12.92    | 28.90    | 74.88     |
| 0.44 | 25976.36      | 93649.28      | 270093.42      | 810833.67      | 0.85 | 4.59    | 9.69     | 20.87    | 54.06     |
| 0.45 | 20637.96      | 76206.63      | 218591.38      | 668545.44      | 0.86 | 3.51    | 7.11     | 14.68    | 36.86     |
| 0.46 | 16765.17      | 61247.48      | 173355.42      | 534638.43      | 0.87 | 2.66    | 5.28     | 10.17    | 25.57     |
| 0.47 | 13902.92      | 49357.94      | 137989.60      | 440645.64      | 0.88 | 2.01    | 3.84     | 7.21     | 17.45     |
| 0.48 | 11318.48      | 40080.32      | 112528.52      | 362760.46      | 0.89 | 1.49    | 2.79     | 5.04     | 11.36     |
| 0.49 | 9060.89       | 32245.41      | 92396.97       | 288088.02      | 0.90 | 1.08    | 1.97     | 3.52     | 7.29      |
| 0.50 | 7402.49       | 26398.59      | 78181.53       | 235691.00      |      |         |          |          |           |

Table S402: Critical values for detector  $\hat{H}_{mov,sn}^{m,0.1}$  with windows size  $n = 0.1$ , and FM-OLS and D-OLS estimation in a model with intercept. The number of integrated regressors is 3 and the highest power of  $x_{kt}$  is 3.

| m    | 90 %           | 95 %           | 97.5 %          | 99 %            | m    | 90 %     | 95 %      | 97.5 %    | 99 %       |
|------|----------------|----------------|-----------------|-----------------|------|----------|-----------|-----------|------------|
| 0.10 | 16542463781.13 | 63031993512.37 | 194915851283.13 | 693016363595.86 | 0.51 | 54715.69 | 203428.38 | 592604.32 | 1976875.09 |
| 0.11 | 8727564669.18  | 34515675891.99 | 103214709739.19 | 382970238363.94 | 0.52 | 44514.63 | 163574.05 | 490354.68 | 1610867.44 |
| 0.12 | 4931677923.27  | 18770267318.70 | 58931674047.28  | 215493700174.86 | 0.53 | 36074.41 | 134445.10 | 402755.29 | 1311264.66 |
| 0.13 | 2878851590.90  | 11071931843.30 | 34961588468.75  | 122446349081.87 | 0.54 | 29548.07 | 109990.85 | 326071.09 | 1110929.89 |
| 0.14 | 1698445561.65  | 6639110064.56  | 20607854688.97  | 75955905536.61  | 0.55 | 24116.14 | 89772.57  | 265508.10 | 900265.62  |
| 0.15 | 1051481118.38  | 4119188994.95  | 12753407442.52  | 46983463265.61  | 0.56 | 19817.75 | 74250.80  | 213021.54 | 713876.91  |
| 0.16 | 680414359.19   | 2573037354.71  | 8279025943.56   | 30088309986.99  | 0.57 | 16252.30 | 60447.43  | 175546.37 | 550939.10  |
| 0.17 | 445406338.53   | 1714684056.16  | 5216905680.58   | 18494283379.28  | 0.58 | 13414.07 | 48065.83  | 139562.56 | 454726.69  |
| 0.18 | 299688913.28   | 1169454375.66  | 3612796986.12   | 12649557633.34  | 0.59 | 10925.12 | 40082.01  | 115129.31 | 365903.07  |
| 0.19 | 203640992.01   | 773407008.82   | 2376632976.78   | 8521122620.87   | 0.60 | 8941.73  | 32658.86  | 93184.70  | 304290.05  |
| 0.20 | 140142005.00   | 547459009.03   | 1666093647.03   | 5920082928.89   | 0.61 | 7261.28  | 26941.38  | 75923.46  | 249227.40  |
| 0.21 | 97897515.53    | 380518308.36   | 1155950093.69   | 4171316564.33   | 0.62 | 5913.46  | 22092.88  | 63630.52  | 202935.83  |
| 0.22 | 69030863.71    | 264816993.00   | 833971558.80    | 2956615820.90   | 0.63 | 4765.47  | 17642.44  | 50986.56  | 160882.02  |
| 0.23 | 48837925.76    | 187891449.36   | 585262209.13    | 2023911585.39   | 0.64 | 3851.43  | 14253.89  | 41014.21  | 130462.19  |
| 0.24 | 36129422.04    | 139412225.80   | 436218956.04    | 1472977939.26   | 0.65 | 3145.04  | 11394.61  | 33708.13  | 107289.33  |
| 0.25 | 26389688.14    | 104788331.81   | 324784226.82    | 1144310553.65   | 0.66 | 2543.27  | 9057.98   | 26865.28  | 87819.37   |
| 0.26 | 19776641.36    | 75609743.10    | 227834972.99    | 824176118.99    | 0.67 | 2049.98  | 7367.26   | 21081.60  | 68739.94   |
| 0.27 | 14618463.12    | 56417429.79    | 175530370.54    | 619805831.48    | 0.68 | 1644.85  | 5926.97   | 16683.95  | 55954.41   |
| 0.28 | 10862974.33    | 42181092.10    | 129188403.94    | 478591083.47    | 0.69 | 1325.11  | 4765.49   | 13214.12  | 43998.07   |
| 0.29 | 8313189.16     | 32158816.57    | 96385933.85     | 342553868.69    | 0.70 | 1081.43  | 3778.18   | 10629.21  | 33802.22   |
| 0.30 | 6397329.77     | 23877009.16    | 72932620.91     | 253107707.54    | 0.71 | 865.34   | 3014.44   | 8431.14   | 25968.07   |
| 0.31 | 4818435.76     | 18459683.47    | 56033547.88     | 192043469.28    | 0.72 | 697.74   | 2403.26   | 6651.75   | 20926.05   |
| 0.32 | 3799631.42     | 14215896.91    | 43375450.67     | 147977056.35    | 0.73 | 556.64   | 1923.94   | 5224.93   | 16741.09   |
| 0.33 | 2938791.33     | 11156789.20    | 34401808.52     | 115922098.66    | 0.74 | 445.77   | 1510.60   | 4124.57   | 12791.03   |
| 0.34 | 2308800.60     | 8742243.79     | 26700824.18     | 91346359.49     | 0.75 | 356.89   | 1157.46   | 3171.97   | 10065.24   |
| 0.35 | 1831383.87     | 6800096.85     | 20950191.56     | 71593258.52     | 0.76 | 281.18   | 911.47    | 2513.92   | 7547.59    |
| 0.36 | 1439819.69     | 5450669.88     | 16444194.98     | 56055177.10     | 0.77 | 227.93   | 714.46    | 1979.06   | 5826.26    |
| 0.37 | 1127173.62     | 4277995.42     | 13167956.91     | 43429590.95     | 0.78 | 179.88   | 556.08    | 1490.74   | 4560.11    |
| 0.38 | 891732.28      | 3442332.52     | 10517167.82     | 35141934.43     | 0.79 | 141.58   | 427.28    | 1116.56   | 3461.91    |
| 0.39 | 719188.40      | 2720854.88     | 8150129.46      | 28480225.28     | 0.80 | 110.06   | 323.20    | 829.96    | 2583.63    |
| 0.40 | 582336.65      | 2186878.26     | 6485489.08      | 22332534.71     | 0.81 | 84.94    | 248.72    | 658.02    | 1963.83    |
| 0.41 | 463291.55      | 1740513.71     | 5107515.35      | 17853103.43     | 0.82 | 66.47    | 189.58    | 502.22    | 1404.73    |
| 0.42 | 376714.14      | 1373595.93     | 4163552.10      | 13996904.79     | 0.83 | 51.39    | 142.68    | 365.21    | 996.89     |
| 0.43 | 298746.56      | 1097225.51     | 3263107.98      | 11080258.13     | 0.84 | 39.15    | 105.25    | 262.89    | 742.17     |
| 0.44 | 234398.87      | 885017.46      | 2628149.17      | 8956957.90      | 0.85 | 29.66    | 77.76     | 192.38    | 535.14     |
| 0.45 | 187290.63      | 710242.26      | 2137917.21      | 6930863.08      | 0.86 | 22.63    | 55.92     | 136.00    | 371.37     |
| 0.46 | 150704.20      | 577890.34      | 1716282.43      | 5428697.43      | 0.87 | 16.91    | 39.94     | 94.85     | 249.75     |
| 0.47 | 121198.44      | 463632.43      | 1398754.97      | 4506554.75      | 0.88 | 12.55    | 28.89     | 66.04     | 166.56     |
| 0.48 | 100019.77      | 378141.34      | 1129622.27      | 3701265.99      | 0.89 | 9.41     | 20.47     | 45.24     | 111.49     |
| 0.49 | 81552.95       | 308547.63      | 922524.99       | 3000846.89      | 0.90 | 6.91     | 13.98     | 30.25     | 72.63      |
| 0.50 | 67505.40       | 247078.01      | 745354.92       | 2365521.57      |      |          |           |           |            |

Table S403: Critical values for detector  $\hat{H}_{mov,sn}^{m,0.1}$  with windows size  $n = 0.1$ , and IM-OLS estimation in a model with intercept. The number of integrated regressors is 3 and the highest power of  $x_{kt}$  is 3.

| m    | 90 %          | 95 %          | 97,5 %         | 99 %           | m    | 90 %    | 95 %     | 97,5 %   | 99 %      |
|------|---------------|---------------|----------------|----------------|------|---------|----------|----------|-----------|
| 0.10 | 2535894780.78 | 9378147721.10 | 27168640532.75 | 91945081447.07 | 0.51 | 8235.87 | 28601.17 | 80302.73 | 252972.17 |
| 0.11 | 1358617473.03 | 5031619908.61 | 14848775992.61 | 50278752077.21 | 0.52 | 6603.99 | 23189.13 | 64881.32 | 195699.78 |
| 0.12 | 762710569.18  | 2787417183.99 | 8320947102.07  | 26491804676.25 | 0.53 | 5357.60 | 18163.98 | 52510.81 | 157700.10 |
| 0.13 | 451575790.55  | 1625279957.95 | 4946562194.38  | 15567399150.93 | 0.54 | 4351.29 | 14724.68 | 41829.71 | 132822.45 |
| 0.14 | 266535350.69  | 972380138.22  | 2960462102.36  | 9545405287.36  | 0.55 | 3547.48 | 11929.20 | 34291.13 | 106334.99 |
| 0.15 | 165099495.26  | 608437615.27  | 1826521707.86  | 6092029491.24  | 0.56 | 2877.55 | 9722.80  | 26914.67 | 83492.92  |
| 0.16 | 106864931.22  | 395336469.58  | 1141560049.66  | 3862758766.98  | 0.57 | 2401.31 | 8010.50  | 22090.84 | 66704.12  |
| 0.17 | 70131471.70   | 258330921.14  | 730838594.42   | 2494734067.37  | 0.58 | 1976.53 | 6423.38  | 17982.23 | 58898.25  |
| 0.18 | 47110783.75   | 172825814.68  | 502111153.66   | 1652402714.83  | 0.59 | 1568.93 | 5327.84  | 14406.92 | 44472.10  |
| 0.19 | 32182205.60   | 116586748.28  | 329984867.76   | 1146480245.45  | 0.60 | 1286.99 | 4244.84  | 11642.25 | 36356.93  |
| 0.20 | 22220474.38   | 81442351.21   | 233254384.76   | 761809046.30   | 0.61 | 1047.42 | 3473.40  | 9671.15  | 30818.83  |
| 0.21 | 15661344.94   | 57183174.56   | 166582649.95   | 545289164.08   | 0.62 | 868.26  | 2841.72  | 7782.75  | 23643.48  |
| 0.22 | 11003712.74   | 40175724.85   | 115996015.86   | 391678767.60   | 0.63 | 707.82  | 2262.50  | 6110.11  | 18753.39  |
| 0.23 | 7787167.91    | 29629816.24   | 84794214.84    | 278585491.83   | 0.64 | 567.79  | 1814.97  | 5027.07  | 15192.97  |
| 0.24 | 5712361.96    | 21396799.43   | 62377643.58    | 200169653.60   | 0.65 | 461.22  | 1445.27  | 3852.21  | 11910.42  |
| 0.25 | 4209008.29    | 15710234.25   | 46535595.85    | 149312527.26   | 0.66 | 367.11  | 1154.07  | 3078.48  | 9170.91   |
| 0.26 | 3159082.76    | 11615935.18   | 33588883.33    | 108874125.71   | 0.67 | 302.65  | 931.05   | 2433.13  | 7475.97   |
| 0.27 | 2325691.76    | 8603464.47    | 25072610.49    | 81767073.96    | 0.68 | 245.07  | 736.02   | 1952.18  | 5663.75   |
| 0.28 | 1753688.38    | 6347959.70    | 18764709.84    | 61665504.69    | 0.69 | 196.71  | 588.18   | 1513.69  | 4383.55   |
| 0.29 | 1320249.44    | 4795838.33    | 13934451.21    | 45905643.58    | 0.70 | 159.36  | 474.84   | 1203.01  | 3514.29   |
| 0.30 | 1002311.82    | 3719076.97    | 10849069.45    | 33632303.77    | 0.71 | 126.26  | 375.19   | 940.96   | 2816.28   |
| 0.31 | 774010.28     | 2809600.02    | 8191825.94     | 26243478.98    | 0.72 | 103.08  | 299.40   | 751.26   | 2202.76   |
| 0.32 | 595841.84     | 2157145.07    | 6314164.99     | 20718867.82    | 0.73 | 84.03   | 237.15   | 610.35   | 1741.87   |
| 0.33 | 464958.80     | 1633294.90    | 5010776.47     | 15940083.58    | 0.74 | 66.53   | 186.19   | 468.61   | 1344.04   |
| 0.34 | 357753.63     | 1300411.70    | 3773647.42     | 12315645.33    | 0.75 | 53.44   | 144.09   | 363.35   | 1028.82   |
| 0.35 | 283039.29     | 1014516.66    | 2969370.42     | 9481928.98     | 0.76 | 43.17   | 115.89   | 280.01   | 800.30    |
| 0.36 | 222415.18     | 812005.82     | 2350152.68     | 7691512.20     | 0.77 | 34.32   | 90.07    | 213.46   | 616.02    |
| 0.37 | 176062.04     | 643027.08     | 1856365.67     | 5903067.32     | 0.78 | 27.23   | 70.56    | 167.51   | 452.38    |
| 0.38 | 136002.38     | 496918.13     | 1456755.08     | 4667245.76     | 0.79 | 21.28   | 53.80    | 127.59   | 342.79    |
| 0.39 | 111338.39     | 394208.86     | 1121593.33     | 3693010.43     | 0.80 | 16.80   | 41.63    | 95.53    | 254.15    |
| 0.40 | 88774.18      | 311637.61     | 892651.25      | 2934712.03     | 0.81 | 13.24   | 31.71    | 72.10    | 190.40    |
| 0.41 | 70936.48      | 250874.27     | 715522.15      | 2246902.55     | 0.82 | 10.22   | 23.88    | 54.07    | 143.53    |
| 0.42 | 56802.88      | 202426.41     | 574344.03      | 1776564.87     | 0.83 | 7.96    | 17.89    | 41.01    | 103.65    |
| 0.43 | 45197.70      | 162395.68     | 455929.54      | 1383108.34     | 0.84 | 6.18    | 13.39    | 29.59    | 75.86     |
| 0.44 | 35856.27      | 129424.11     | 373416.99      | 1092135.30     | 0.85 | 4.80    | 9.97     | 21.28    | 54.73     |
| 0.45 | 28624.90      | 105021.71     | 297528.65      | 895100.24      | 0.86 | 3.64    | 7.29     | 14.85    | 37.23     |
| 0.46 | 23093.58      | 84667.87      | 237517.15      | 729192.80      | 0.87 | 2.75    | 5.38     | 10.29    | 25.72     |
| 0.47 | 19044.25      | 67251.84      | 187572.93      | 590004.25      | 0.88 | 2.09    | 3.92     | 7.29     | 17.55     |
| 0.48 | 15385.61      | 54124.76      | 152655.41      | 480125.13      | 0.89 | 1.56    | 2.86     | 5.10     | 11.42     |
| 0.49 | 12377.28      | 43642.53      | 125085.93      | 386695.09      | 0.90 | 1.16    | 2.05     | 3.59     | 7.35      |
| 0.50 | 10098.29      | 35516.28      | 103914.90      | 314647.21      |      |         |          |          |           |

Table S404: Critical values for detector  $\hat{H}_{mov,sn}^{m,0.2}$  with windows size  $n = 0.2$ , and FM-OLS and D-OLS estimation in a model with intercept. The number of integrated regressors is 3 and the highest power of  $x_{kt}$  is 3.

| m    | 90 %           | 95 %           | 97.5 %          | 99 %             | m    | 90 %     | 95 %      | 97.5 %    | 99 %       |
|------|----------------|----------------|-----------------|------------------|------|----------|-----------|-----------|------------|
| 0.10 | 24367208585.29 | 94321802195.64 | 292828973901.93 | 1041938899420.40 | 0.51 | 74060.88 | 273075.16 | 791980.51 | 2598531.62 |
| 0.11 | 12847030343.16 | 50998733415.32 | 155684995249.14 | 576859044236.37  | 0.52 | 58947.04 | 215981.38 | 643512.79 | 2101794.25 |
| 0.12 | 7300241857.73  | 27931212455.50 | 88490347500.23  | 324576503072.22  | 0.53 | 48009.50 | 176761.21 | 519995.39 | 1724052.31 |
| 0.13 | 4241846561.42  | 16505272617.89 | 52804324505.50  | 187481073683.74  | 0.54 | 39325.99 | 144019.39 | 431710.91 | 1434692.60 |
| 0.14 | 2514786339.77  | 9877173100.09  | 30312659095.92  | 112819396789.53  | 0.55 | 31881.41 | 117761.46 | 341173.47 | 1153825.26 |
| 0.15 | 1533370588.82  | 6048294319.28  | 18997638809.77  | 70543648930.59   | 0.56 | 26085.43 | 96338.08  | 274730.41 | 922824.07  |
| 0.16 | 998918039.02   | 3833122105.32  | 12269175678.03  | 44780401327.05   | 0.57 | 21149.36 | 78407.34  | 225763.76 | 709261.05  |
| 0.17 | 654701113.93   | 2542753541.63  | 7746203486.08   | 28180320452.36   | 0.58 | 17531.30 | 62113.77  | 180362.53 | 568412.82  |
| 0.18 | 439761769.89   | 1722521872.74  | 5279141817.79   | 19054452468.82   | 0.59 | 14226.31 | 51156.12  | 147407.37 | 463274.98  |
| 0.19 | 298939585.06   | 1134394682.23  | 3549236435.09   | 12554369210.12   | 0.60 | 11530.30 | 41256.87  | 117751.91 | 377949.02  |
| 0.20 | 204420853.22   | 808939392.57   | 2436733981.58   | 8752699199.26    | 0.61 | 9299.97  | 33989.64  | 96050.97  | 304445.09  |
| 0.21 | 142164534.72   | 561004948.83   | 1710674528.97   | 6187865979.77    | 0.62 | 7556.34  | 27859.64  | 78884.76  | 244816.70  |
| 0.22 | 100454718.63   | 386408231.94   | 1220471734.84   | 4313523206.32    | 0.63 | 6073.47  | 22131.66  | 62201.55  | 199370.94  |
| 0.23 | 71274810.42    | 275134698.28   | 858122167.00    | 2969020196.13    | 0.64 | 4860.06  | 17591.14  | 50190.65  | 155497.96  |
| 0.24 | 52391514.15    | 204086942.94   | 639013550.28    | 2174177948.79    | 0.65 | 3929.60  | 13903.68  | 40500.17  | 128055.34  |
| 0.25 | 38400710.96    | 151586779.95   | 468745234.25    | 1690013627.42    | 0.66 | 3160.14  | 11091.07  | 32211.32  | 105564.34  |
| 0.26 | 28465262.69    | 110334510.45   | 333387619.53    | 1211317577.04    | 0.67 | 2530.15  | 9008.22   | 25084.42  | 80841.86   |
| 0.27 | 21171824.80    | 81642371.77    | 255637401.18    | 899670195.22     | 0.68 | 2021.96  | 7145.74   | 19764.50  | 65122.40   |
| 0.28 | 15634270.88    | 60829640.39    | 186300341.37    | 684698187.48     | 0.69 | 1622.71  | 5713.35   | 15534.10  | 51020.60   |
| 0.29 | 11907704.18    | 46297080.04    | 139517898.59    | 499856643.55     | 0.70 | 1306.28  | 4450.98   | 12184.35  | 38904.58   |
| 0.30 | 9175251.32     | 34648815.43    | 104580533.70    | 370699448.20     | 0.71 | 1036.37  | 3518.26   | 9692.35   | 29932.98   |
| 0.31 | 6938235.25     | 26365818.22    | 81095535.93     | 276978538.09     | 0.72 | 823.48   | 2782.03   | 7588.73   | 23477.85   |
| 0.32 | 5438810.62     | 20259994.11    | 62566001.61     | 213082638.38     | 0.73 | 656.02   | 2206.23   | 5926.80   | 18893.12   |
| 0.33 | 4206257.69     | 15969487.90    | 49082365.43     | 165713844.02     | 0.74 | 519.31   | 1728.51   | 4667.61   | 14166.79   |
| 0.34 | 3282966.41     | 12334673.70    | 37873228.85     | 131498867.28     | 0.75 | 413.91   | 1312.42   | 3538.07   | 10968.08   |
| 0.35 | 2558656.31     | 9622535.60     | 29677205.77     | 103241395.64     | 0.76 | 324.23   | 1014.45   | 2775.76   | 8216.10    |
| 0.36 | 2029112.51     | 7779262.69     | 23285053.95     | 80364680.85      | 0.77 | 258.21   | 786.29    | 2156.30   | 6272.46    |
| 0.37 | 1593336.87     | 6078193.14     | 18438450.65     | 62080729.75      | 0.78 | 201.99   | 608.03    | 1619.14   | 4818.16    |
| 0.38 | 1264838.65     | 4824030.98     | 14807632.22     | 49461126.09      | 0.79 | 156.96   | 462.70    | 1193.94   | 3668.42    |
| 0.39 | 1003873.92     | 3822978.20     | 11369956.16     | 39915661.84      | 0.80 | 120.80   | 349.39    | 877.34    | 2708.57    |
| 0.40 | 815701.80      | 3062141.77     | 9039120.94      | 30980669.61      | 0.81 | 92.78    | 264.74    | 688.80    | 2049.99    |
| 0.41 | 652692.33      | 2425466.15     | 6995080.78      | 25202218.73      | 0.82 | 71.44    | 200.21    | 523.61    | 1440.01    |
| 0.42 | 523348.84      | 1921709.20     | 5753284.37      | 19323195.49      | 0.83 | 54.60    | 148.85    | 377.22    | 1019.62    |
| 0.43 | 411105.88      | 1527642.96     | 4517909.62      | 15233260.92      | 0.84 | 41.36    | 108.83    | 269.32    | 754.88     |
| 0.44 | 326170.26      | 1217610.04     | 3590163.36      | 12171083.80      | 0.85 | 31.00    | 79.63     | 195.95    | 541.60     |
| 0.45 | 258399.81      | 975692.06      | 2915862.98      | 9565283.81       | 0.86 | 23.42    | 57.10     | 138.20    | 374.74     |
| 0.46 | 205034.02      | 787273.08      | 2329097.26      | 7468325.08       | 0.87 | 17.41    | 40.51     | 95.26     | 250.64     |
| 0.47 | 165527.09      | 628929.76      | 1885698.36      | 6125404.90       | 0.88 | 12.79    | 29.14     | 66.53     | 167.10     |
| 0.48 | 135649.18      | 511225.54      | 1539154.79      | 5003918.86       | 0.89 | 9.56     | 20.62     | 45.39     | 111.68     |
| 0.49 | 110872.11      | 416610.04      | 1230567.11      | 4037610.75       | 0.90 | 7.03     | 14.10     | 30.34     | 72.72      |
| 0.50 | 90798.20       | 335283.07      | 1003148.01      | 3199828.64       |      |          |           |           |            |

Table S405: Critical values for detector  $\hat{H}_{mov,sn}^{m,0.2}$  with windows size  $n = 0.2$ , and IM-OLS estimation in a model with intercept. The number of integrated regressors is 3 and the highest power of  $x_{kt}$  is 3.

| m    | 90 %          | 95 %           | 97,5 %         | 99 %            | m    | 90 %    | 95 %     | 97,5 %   | 99 %      |
|------|---------------|----------------|----------------|-----------------|------|---------|----------|----------|-----------|
| 0.10 | 2909463475.38 | 10798988338.82 | 31488346147.67 | 104622847317.49 | 0.51 | 8824.13 | 30605.74 | 85324.47 | 270450.40 |
| 0.11 | 1568382333.40 | 5761975817.48  | 17101308214.09 | 57512413824.53  | 0.52 | 7066.20 | 24705.95 | 69041.46 | 208857.81 |
| 0.12 | 869931018.64  | 3205662352.58  | 9598336799.40  | 30709045055.77  | 0.53 | 5736.46 | 19224.52 | 55586.61 | 165814.41 |
| 0.13 | 517548541.40  | 1865451356.90  | 5694194641.49  | 17864913265.95  | 0.54 | 4616.73 | 15519.62 | 44217.42 | 138371.90 |
| 0.14 | 304032668.98  | 1117117923.98  | 3393803945.92  | 11039463612.63  | 0.55 | 3777.55 | 12586.97 | 36030.03 | 112192.60 |
| 0.15 | 188748553.17  | 697634080.52   | 2100088435.08  | 7055207002.61   | 0.56 | 3041.39 | 10219.71 | 28208.40 | 86805.97  |
| 0.16 | 121605967.26  | 451234742.68   | 1319837696.65  | 4424241536.60   | 0.57 | 2566.61 | 8441.22  | 23013.73 | 69045.20  |
| 0.17 | 79768715.48   | 294877429.94   | 837088847.09   | 2865416040.38   | 0.58 | 2087.95 | 6737.93  | 18607.15 | 61062.60  |
| 0.18 | 53836708.25   | 197126359.84   | 573289665.74   | 1903918631.85   | 0.59 | 1658.34 | 5563.43  | 15027.26 | 45948.97  |
| 0.19 | 36810586.11   | 132187288.58   | 377369739.94   | 1315587694.61   | 0.60 | 1355.97 | 4385.15  | 12055.05 | 37549.21  |
| 0.20 | 25102198.05   | 92314814.94    | 264827421.72   | 867041131.83    | 0.61 | 1093.84 | 3574.85  | 9974.24  | 31348.95  |
| 0.21 | 17734744.87   | 64746691.44    | 187462939.33   | 624897644.38    | 0.62 | 907.71  | 2937.46  | 7975.25  | 24313.76  |
| 0.22 | 12479895.14   | 45467468.49    | 131799219.61   | 443712971.12    | 0.63 | 734.43  | 2335.04  | 6278.61  | 19075.24  |
| 0.23 | 8807631.47    | 33537922.36    | 95911928.13    | 315283158.18    | 0.64 | 586.96  | 1869.71  | 5113.35  | 15381.64  |
| 0.24 | 6522097.89    | 24294438.43    | 70763289.06    | 227245024.02    | 0.65 | 476.79  | 1484.86  | 3927.27  | 12101.09  |
| 0.25 | 4777105.79    | 17708613.65    | 52244416.77    | 166928045.60    | 0.66 | 378.53  | 1182.27  | 3124.51  | 9293.27   |
| 0.26 | 3555631.25    | 13079730.62    | 37845437.90    | 122223441.60    | 0.67 | 310.79  | 947.97   | 2472.88  | 7561.74   |
| 0.27 | 2612257.17    | 9697201.66     | 28274648.12    | 91358897.39     | 0.68 | 250.52  | 747.12   | 1973.98  | 5709.41   |
| 0.28 | 1962799.93    | 7075778.85     | 21040598.25    | 69641648.69     | 0.69 | 200.41  | 596.60   | 1527.30  | 4429.36   |
| 0.29 | 1478996.42    | 5390166.61     | 15671978.58    | 50760113.46     | 0.70 | 162.02  | 480.10   | 1211.08  | 3539.44   |
| 0.30 | 1126362.24    | 4143986.50     | 12084189.07    | 37652748.47     | 0.71 | 128.19  | 378.60   | 944.94   | 2821.55   |
| 0.31 | 869491.34     | 3167794.59     | 9077452.05     | 29108932.65     | 0.72 | 104.48  | 301.50   | 756.62   | 2214.17   |
| 0.32 | 665551.78     | 2417379.02     | 7055602.40     | 22773410.26     | 0.73 | 84.73   | 237.88   | 612.16   | 1745.25   |
| 0.33 | 518035.08     | 1833609.84     | 5556777.07     | 17755467.17     | 0.74 | 66.91   | 186.51   | 469.21   | 1346.76   |
| 0.34 | 400370.48     | 1453854.24     | 4181798.05     | 13573205.92     | 0.75 | 53.64   | 144.80   | 364.13   | 1029.23   |
| 0.35 | 315397.65     | 1134852.94     | 3306284.26     | 10480943.37     | 0.76 | 43.33   | 116.04   | 280.17   | 800.47    |
| 0.36 | 245843.53     | 899222.78      | 2583908.09     | 8379272.52      | 0.77 | 34.42   | 90.18    | 213.54   | 616.45    |
| 0.37 | 195023.02     | 706237.94      | 2041453.25     | 6514665.01      | 0.78 | 27.31   | 70.62    | 167.64   | 452.55    |
| 0.38 | 150771.92     | 551108.42      | 1603892.66     | 5110650.11      | 0.79 | 21.35   | 53.87    | 127.67   | 342.91    |
| 0.39 | 122717.65     | 431896.98      | 1221198.83     | 4044000.65      | 0.80 | 16.88   | 41.73    | 95.63    | 254.24    |
| 0.40 | 97668.90      | 342590.78      | 968331.28      | 3167441.49      | 0.81 | 13.36   | 31.80    | 72.16    | 190.44    |
| 0.41 | 77951.17      | 275902.00      | 781273.58      | 2480244.35      | 0.82 | 10.33   | 23.95    | 54.20    | 143.58    |
| 0.42 | 62095.95      | 220141.15      | 626359.41      | 1971720.26      | 0.83 | 8.06    | 18.02    | 41.19    | 103.78    |
| 0.43 | 49405.52      | 176766.89      | 495484.71      | 1498089.48      | 0.84 | 6.30    | 13.52    | 29.71    | 75.94     |
| 0.44 | 39263.78      | 140990.68      | 407398.92      | 1189822.50      | 0.85 | 4.92    | 10.10    | 21.37    | 54.85     |
| 0.45 | 31064.82      | 113245.94      | 317497.89      | 963834.39       | 0.86 | 3.76    | 7.41     | 14.98    | 37.28     |
| 0.46 | 25047.52      | 91625.77       | 254589.38      | 776027.38       | 0.87 | 2.86    | 5.50     | 10.44    | 25.76     |
| 0.47 | 20684.92      | 73120.42       | 201814.02      | 631790.54       | 0.88 | 2.20    | 4.04     | 7.37     | 17.71     |
| 0.48 | 16651.30      | 58545.29       | 162614.93      | 516410.93       | 0.89 | 1.68    | 2.98     | 5.21     | 11.57     |
| 0.49 | 13358.64      | 46937.20       | 134177.86      | 413310.22       | 0.90 | 1.29    | 2.17     | 3.70     | 7.47      |
| 0.50 | 10875.09      | 37962.20       | 110521.39      | 333066.91       |      |         |          |          |           |

Table S406: Critical values for detector  $\hat{H}_{mov,sn}^{m,0.3}$  with windows size  $n = 0.3$ , and FM-OLS and D-OLS estimation in a model with intercept. The number of integrated regressors is 3 and the highest power of  $x_{kt}$  is 3.

| m    | 90 %           | 95 %            | 97,5 %          | 99 %             | m    | 90 %     | 95 %      | 97,5 %    | 99 %       |
|------|----------------|-----------------|-----------------|------------------|------|----------|-----------|-----------|------------|
| 0.10 | 27876461248.38 | 107756817814.39 | 339998876581.49 | 1206352001973.20 | 0.51 | 79731.36 | 292167.66 | 843068.08 | 2752014.50 |
| 0.11 | 14708461220.22 | 58159243999.87  | 181593681174.22 | 658871634271.72  | 0.52 | 62982.52 | 232258.14 | 680677.11 | 2232445.17 |
| 0.12 | 8363090017.70  | 31972769622.23  | 101223346284.02 | 374778865910.53  | 0.53 | 51457.12 | 187098.31 | 547767.57 | 1805074.60 |
| 0.13 | 4883584124.03  | 18930436387.62  | 60713274401.01  | 216563325836.81  | 0.54 | 41801.93 | 152641.79 | 454339.58 | 1495614.39 |
| 0.14 | 2873276461.79  | 11378506867.35  | 34731494463.12  | 131302504499.71  | 0.55 | 33896.57 | 124401.49 | 360435.87 | 1199061.12 |
| 0.15 | 1749519789.49  | 6950980698.18   | 21922959948.75  | 81313589994.24   | 0.56 | 27636.21 | 100766.45 | 289358.41 | 957966.88  |
| 0.16 | 1137606672.06  | 4404135259.31   | 14185256909.10  | 51282695738.57   | 0.57 | 22484.05 | 82221.02  | 236568.70 | 735431.94  |
| 0.17 | 743349796.28   | 2915117701.95   | 8911582450.08   | 31910493837.01   | 0.58 | 18462.56 | 65195.55  | 186735.46 | 583449.16  |
| 0.18 | 502243424.01   | 1963657191.76   | 6025223002.31   | 21975139339.19   | 0.59 | 15029.25 | 53418.84  | 152395.31 | 478120.38  |
| 0.19 | 341729752.83   | 1290488917.35   | 4031151162.35   | 14183672025.43   | 0.60 | 12092.47 | 42640.48  | 120971.34 | 388439.45  |
| 0.20 | 231904050.81   | 919544921.31    | 2771365802.96   | 10126378349.94   | 0.61 | 9763.08  | 35197.70  | 98555.56  | 313151.91  |
| 0.21 | 162102566.53   | 640458220.76    | 1930355096.68   | 7040261978.65    | 0.62 | 7909.46  | 28832.90  | 81331.67  | 254352.93  |
| 0.22 | 113725007.12   | 438150544.57    | 1392131867.75   | 4857180390.36    | 0.63 | 6308.13  | 22845.56  | 63930.32  | 204334.84  |
| 0.23 | 80915571.81    | 309394901.90    | 972993437.01    | 3387811469.69    | 0.64 | 5039.54  | 18126.52  | 51076.05  | 157599.33  |
| 0.24 | 59637108.88    | 231117585.33    | 716185966.65    | 2459660669.77    | 0.65 | 4055.58  | 14348.15  | 41328.08  | 130464.31  |
| 0.25 | 43446534.35    | 171151011.16    | 532135729.59    | 1915273012.70    | 0.66 | 3254.07  | 11291.42  | 32786.37  | 107297.16  |
| 0.26 | 32001617.05    | 124849662.71    | 377777750.97    | 1364757706.52    | 0.67 | 2604.66  | 9168.60   | 25447.00  | 81965.85   |
| 0.27 | 23831733.52    | 91492614.22     | 287783802.70    | 1018265710.04    | 0.68 | 2060.11  | 7242.71   | 19989.30  | 65782.57   |
| 0.28 | 17573614.33    | 68573814.02     | 209114586.80    | 759358729.89     | 0.69 | 1654.07  | 5783.61   | 15659.30  | 51366.90   |
| 0.29 | 13290516.36    | 52024971.82     | 155969226.34    | 560503474.58     | 0.70 | 1327.51  | 4491.65   | 12258.90  | 39022.14   |
| 0.30 | 10258512.07    | 39000947.90     | 116982604.63    | 414480244.23     | 0.71 | 1050.92  | 3542.29   | 9742.41   | 30193.37   |
| 0.31 | 7760106.50     | 29489036.81     | 90937612.89     | 309520625.56     | 0.72 | 833.09   | 2797.96   | 7614.09   | 23548.38   |
| 0.32 | 6060435.13     | 22573874.40     | 69913421.34     | 236095953.90     | 0.73 | 661.18   | 2217.14   | 5944.63   | 18973.60   |
| 0.33 | 4675183.30     | 17736712.19     | 54825513.47     | 185859751.38     | 0.74 | 522.68   | 1731.88   | 4680.37   | 14228.16   |
| 0.34 | 3655804.78     | 13794158.32     | 42201162.48     | 146625116.20     | 0.75 | 415.69   | 1316.63   | 3539.42   | 10981.14   |
| 0.35 | 2864112.81     | 10645666.93     | 32928597.55     | 114535325.36     | 0.76 | 325.20   | 1015.53   | 2778.43   | 8216.42    |
| 0.36 | 2257104.13     | 8629915.08      | 25779500.79     | 88647504.75      | 0.77 | 258.83   | 787.05    | 2156.60   | 6273.41    |
| 0.37 | 1762377.75     | 6711422.76      | 20389761.32     | 68895653.69      | 0.78 | 202.21   | 608.39    | 1619.42   | 4818.68    |
| 0.38 | 1406416.99     | 5324353.22      | 16135366.99     | 55209065.10      | 0.79 | 157.07   | 462.85    | 1194.02   | 3668.56    |
| 0.39 | 1110623.55     | 4236812.22      | 12339559.72     | 43153044.59      | 0.80 | 120.91   | 349.50    | 877.41    | 2708.67    |
| 0.40 | 900168.95      | 3392086.59      | 9843523.09      | 33569428.66      | 0.81 | 92.89    | 264.87    | 688.87    | 2050.16    |
| 0.41 | 717229.92      | 2643723.71      | 7612714.67      | 26987079.97      | 0.82 | 71.57    | 200.30    | 523.75    | 1440.13    |
| 0.42 | 569866.62      | 2099781.61      | 6216943.02      | 20855346.83      | 0.83 | 54.71    | 148.91    | 377.33    | 1019.71    |
| 0.43 | 449016.07      | 1655443.72      | 4925067.09      | 16510417.46      | 0.84 | 41.47    | 108.93    | 269.40    | 754.96     |
| 0.44 | 355564.83      | 1341952.28      | 3886900.50      | 13253421.65      | 0.85 | 31.09    | 79.74     | 196.03    | 541.70     |
| 0.45 | 281305.30      | 1059235.70      | 3142753.14      | 10428370.91      | 0.86 | 23.53    | 57.22     | 138.32    | 374.79     |
| 0.46 | 223219.03      | 848173.03       | 2488315.56      | 8100200.85       | 0.87 | 17.53    | 40.63     | 95.38     | 250.79     |
| 0.47 | 179749.87      | 678990.21       | 2034461.50      | 6574825.13       | 0.88 | 12.90    | 29.25     | 66.62     | 167.24     |
| 0.48 | 146767.77      | 550159.14       | 1628706.34      | 5390952.26       | 0.89 | 9.66     | 20.73     | 45.51     | 111.81     |
| 0.49 | 120231.45      | 446802.96       | 1314769.46      | 4256823.23       | 0.90 | 7.14     | 14.19     | 30.47     | 72.85      |
| 0.50 | 97840.53       | 361645.18       | 1065109.27      | 3372552.24       |      |          |           |           |            |

Table S407: Critical values for detector  $\hat{H}_{mov,sn}^{m,0.3}$  with windows size  $n = 0.3$ , and IM-OLS estimation in a model with intercept. The number of integrated regressors is 3 and the highest power of  $x_{kt}$  is 3.



| m    | 90 %          | 95 %           | 97,5 %         | 99 %            | m    | 90 %     | 95 %     | 97,5 %   | 99 %      |
|------|---------------|----------------|----------------|-----------------|------|----------|----------|----------|-----------|
| 0.10 | 4430383559.80 | 14918403912.53 | 40096383341.85 | 121566140704.94 | 0.51 | 10471.93 | 35534.18 | 99926.53 | 293440.93 |
| 0.11 | 2342857702.58 | 7651177486.00  | 21050435647.19 | 65476103943.52  | 0.52 | 8462.98  | 28653.65 | 78146.17 | 239862.86 |
| 0.12 | 1281954602.62 | 4215814167.96  | 11811137752.14 | 35074409235.72  | 0.53 | 6896.22  | 22282.84 | 62537.28 | 193177.73 |
| 0.13 | 738571739.96  | 2439781850.56  | 6737188150.78  | 20125185509.66  | 0.54 | 5609.82  | 18133.90 | 52009.73 | 154817.71 |
| 0.14 | 417330473.53  | 1435664226.07  | 4039154753.12  | 12274575600.27  | 0.55 | 4595.33  | 14787.58 | 41868.78 | 124611.54 |
| 0.15 | 256727971.54  | 887495496.68   | 2485540505.60  | 7646318498.36   | 0.56 | 3731.59  | 11970.01 | 33475.84 | 100172.90 |
| 0.16 | 164665071.87  | 554764211.25   | 1536620673.28  | 4875550243.90   | 0.57 | 3143.70  | 9865.01  | 27371.44 | 81437.99  |
| 0.17 | 105091232.81  | 355284949.93   | 968573600.08   | 3126130216.86   | 0.58 | 2563.28  | 8157.49  | 22144.11 | 68969.04  |
| 0.18 | 69479841.50   | 240160312.34   | 638390971.28   | 2030372925.38   | 0.59 | 2097.59  | 6620.06  | 17975.97 | 55079.38  |
| 0.19 | 46574416.58   | 159611251.53   | 435220570.62   | 1392897707.67   | 0.60 | 1701.32  | 5396.06  | 14398.61 | 44959.14  |
| 0.20 | 32000776.33   | 109047419.20   | 299333581.15   | 932982099.51    | 0.61 | 1414.41  | 4517.41  | 11894.81 | 37207.78  |
| 0.21 | 22185573.23   | 75620590.67    | 211137119.22   | 668445030.48    | 0.62 | 1174.43  | 3645.99  | 9546.22  | 29634.28  |
| 0.22 | 15592126.67   | 53297203.22    | 145867886.56   | 460279346.41    | 0.63 | 951.33   | 2887.79  | 7736.26  | 23571.93  |
| 0.23 | 10912690.24   | 38066312.45    | 106061203.08   | 329062286.52    | 0.64 | 782.66   | 2364.67  | 6360.89  | 18960.08  |
| 0.24 | 7979051.34    | 27321422.80    | 76488831.34    | 241182349.84    | 0.65 | 633.25   | 1902.19  | 5046.87  | 14488.03  |
| 0.25 | 5844376.73    | 20279340.10    | 55157429.36    | 173512933.52    | 0.66 | 520.29   | 1515.60  | 3994.44  | 11853.52  |
| 0.26 | 4228046.09    | 15052864.09    | 41596176.33    | 126996220.83    | 0.67 | 424.94   | 1211.20  | 3165.45  | 9380.62   |
| 0.27 | 3172852.41    | 11089229.52    | 30654001.13    | 94345532.73     | 0.68 | 350.23   | 972.89   | 2498.12  | 7404.57   |
| 0.28 | 2359105.44    | 8195493.75     | 22739482.33    | 70551199.18     | 0.69 | 280.50   | 796.35   | 1998.00  | 5726.96   |
| 0.29 | 1771743.27    | 6089060.93     | 16736500.77    | 50593436.46     | 0.70 | 231.87   | 638.63   | 1619.85  | 4712.70   |
| 0.30 | 1323587.94    | 4623932.76     | 12832761.04    | 38330059.02     | 0.71 | 190.06   | 511.29   | 1273.87  | 3637.95   |
| 0.31 | 1024575.73    | 3503001.69     | 9756432.77     | 31040406.06     | 0.72 | 155.80   | 407.73   | 1010.28  | 2878.69   |
| 0.32 | 773098.17     | 2684618.86     | 7701175.61     | 23656816.79     | 0.73 | 127.22   | 330.35   | 826.21   | 2293.15   |
| 0.33 | 602873.98     | 2084693.13     | 5803439.84     | 17959916.51     | 0.74 | 102.48   | 259.35   | 636.78   | 1809.82   |
| 0.34 | 462279.84     | 1565104.16     | 4513929.48     | 13850498.95     | 0.75 | 83.46    | 206.92   | 495.36   | 1356.00   |
| 0.35 | 365677.89     | 1250458.34     | 3512909.13     | 10841448.82     | 0.76 | 67.05    | 165.54   | 391.47   | 1089.62   |
| 0.36 | 286098.54     | 993473.83      | 2784559.74     | 8538490.51      | 0.77 | 54.07    | 130.87   | 304.65   | 851.78    |
| 0.37 | 229168.68     | 774771.90      | 2220196.39     | 6852566.03      | 0.78 | 43.70    | 104.45   | 234.43   | 619.20    |
| 0.38 | 176502.52     | 609355.31      | 1731270.23     | 5368382.72      | 0.79 | 34.67    | 80.27    | 184.62   | 481.96    |
| 0.39 | 143244.78     | 481872.73      | 1344194.06     | 4185402.28      | 0.80 | 27.77    | 62.35    | 139.85   | 361.55    |
| 0.40 | 112434.80     | 383600.23      | 1037706.11     | 3330176.47      | 0.81 | 21.76    | 48.47    | 105.25   | 275.10    |
| 0.41 | 90709.11      | 307837.34      | 834485.72      | 2583424.51      | 0.82 | 17.14    | 37.01    | 80.63    | 215.92    |
| 0.42 | 71683.58      | 246310.23      | 671503.31      | 2021044.19      | 0.83 | 13.37    | 28.14    | 59.99    | 155.21    |
| 0.43 | 57106.49      | 194966.94      | 535721.90      | 1606578.72      | 0.84 | 10.40    | 21.28    | 44.51    | 110.73    |
| 0.44 | 46056.55      | 156973.92      | 437400.13      | 1295583.61      | 0.85 | 8.05     | 15.95    | 32.57    | 82.01     |
| 0.45 | 36534.30      | 125330.70      | 351578.47      | 1041748.37      | 0.86 | 6.13     | 11.64    | 22.57    | 56.30     |
| 0.46 | 29895.62      | 99898.85       | 274781.46      | 832450.99       | 0.87 | 4.60     | 8.54     | 16.21    | 38.73     |
| 0.47 | 24206.24      | 79727.29       | 218787.16      | 676855.24       | 0.88 | 3.41     | 6.20     | 11.45    | 26.78     |
| 0.48 | 19411.21      | 64942.46       | 182841.80      | 567858.42       | 0.89 | 2.51     | 4.47     | 7.81     | 17.42     |
| 0.49 | 15592.88      | 53785.24       | 150381.89      | 454846.19       | 0.90 | 1.80     | 3.12     | 5.35     | 11.26     |
| 0.50 | 12796.16      | 43794.06       | 126978.57      | 378537.61       |      |          |          |          |           |

Table S408: Critical values for detector  $\hat{H}_{mov,sn}^{m,0.1}$  with windows size  $n = 0.1$ , and FM-OLS and D-OLS estimation in a model with intercept and linear trend. The number of integrated regressors is 3 and the highest power of  $x_{kt}$  is 3.

| m    | 90 %           | 95 %            | 97,5 %          | 99 %             | m    | 90 %     | 95 %      | 97,5 %    | 99 %       |
|------|----------------|-----------------|-----------------|------------------|------|----------|-----------|-----------|------------|
| 0.10 | 30519391949.70 | 105782083521.97 | 310179048856.45 | 1032882169831.56 | 0.51 | 66079.94 | 235758.64 | 685805.10 | 2209790.62 |
| 0.11 | 15704812462.91 | 55473735403.79  | 162939428431.92 | 537663381392.48  | 0.52 | 53817.21 | 190484.26 | 556093.48 | 1847294.95 |
| 0.12 | 8661124065.15  | 30556041696.59  | 89427284931.20  | 295115726925.62  | 0.53 | 43721.91 | 155098.34 | 451462.21 | 1503208.71 |
| 0.13 | 4893138183.08  | 17579941151.72  | 50945920861.86  | 171501108328.07  | 0.54 | 36197.16 | 128291.54 | 365176.08 | 1225794.15 |
| 0.14 | 2851167273.34  | 10217678523.62  | 29866440602.35  | 101081590198.19  | 0.55 | 29341.17 | 105305.32 | 301159.00 | 964650.21  |
| 0.15 | 1729186970.82  | 6212849462.44   | 18995261286.60  | 60695291311.45   | 0.56 | 23965.46 | 84347.87  | 240106.87 | 795734.45  |
| 0.16 | 1090947632.85  | 3867707642.76   | 11753638610.82  | 40197690455.72   | 0.57 | 19722.93 | 67600.84  | 193350.48 | 626738.41  |
| 0.17 | 703911263.18   | 2547016954.68   | 7309517607.79   | 24372374136.29   | 0.58 | 15831.70 | 55066.91  | 157237.76 | 500615.28  |
| 0.18 | 462910736.99   | 1661056305.67   | 4894044575.85   | 15765729293.94   | 0.59 | 13089.80 | 45603.37  | 131577.00 | 402805.52  |
| 0.19 | 313224298.42   | 1114927932.89   | 3248463607.27   | 11350209087.65   | 0.60 | 10720.68 | 36996.85  | 107685.35 | 323851.35  |
| 0.20 | 211727014.07   | 778713679.24    | 2222800152.58   | 7748429661.69    | 0.61 | 8884.87  | 30474.89  | 85456.81  | 268996.15  |
| 0.21 | 145546985.02   | 537003956.39    | 1599953096.16   | 5181934085.10    | 0.62 | 7360.95  | 25338.02  | 70922.24  | 220555.01  |
| 0.22 | 103404078.51   | 379374681.77    | 1112017621.16   | 3695471980.80    | 0.63 | 5879.43  | 20132.49  | 57232.25  | 181813.35  |
| 0.23 | 72988554.93    | 263545002.81    | 768638914.16    | 2582600447.24    | 0.64 | 4679.20  | 16177.25  | 45455.96  | 144975.69  |
| 0.24 | 52578584.71    | 191594279.31    | 554574624.64    | 1863553428.19    | 0.65 | 3827.59  | 13173.74  | 37316.50  | 116271.08  |
| 0.25 | 38016249.56    | 139790779.98    | 420362679.28    | 1414881137.12    | 0.66 | 3077.22  | 10562.99  | 30093.57  | 90361.28   |
| 0.26 | 28051294.34    | 101383508.82    | 302211648.28    | 1035519302.87    | 0.67 | 2476.54  | 8409.48   | 24363.73  | 75932.16   |
| 0.27 | 20539440.68    | 73644713.99     | 224973013.74    | 789398137.40     | 0.68 | 1974.49  | 6631.84   | 19068.12  | 59952.82   |
| 0.28 | 15256628.90    | 55074083.98     | 164308233.95    | 567945897.62     | 0.69 | 1598.35  | 5303.70   | 14740.78  | 48752.74   |
| 0.29 | 11613681.74    | 42083681.91     | 121997531.98    | 404269709.80     | 0.70 | 1292.69  | 4241.13   | 11788.14  | 38686.78   |
| 0.30 | 8715811.92     | 30985766.95     | 89901339.26     | 300172429.39     | 0.71 | 1048.56  | 3287.00   | 9113.62   | 29897.09   |
| 0.31 | 6629725.93     | 23433352.11     | 68870209.98     | 223810525.51     | 0.72 | 849.67   | 2656.41   | 7370.32   | 23786.43   |
| 0.32 | 5075896.20     | 18036997.61     | 52832992.18     | 181610287.46     | 0.73 | 683.78   | 2098.37   | 5797.90   | 18512.35   |
| 0.33 | 3922940.78     | 14317799.00     | 41357344.64     | 136587433.76     | 0.74 | 549.66   | 1660.31   | 4564.82   | 14086.22   |
| 0.34 | 3036372.19     | 10837543.64     | 32734869.95     | 108100660.82     | 0.75 | 438.70   | 1285.68   | 3504.25   | 10979.46   |
| 0.35 | 2390785.57     | 8330215.36      | 24925584.01     | 83434851.27      | 0.76 | 351.18   | 1028.31   | 2755.92   | 8613.29    |
| 0.36 | 1887042.16     | 6520069.38      | 19366089.19     | 63706266.20      | 0.77 | 282.56   | 797.86    | 2128.76   | 6685.25    |
| 0.37 | 1498981.49     | 5250464.80      | 14959636.20     | 49333815.74      | 0.78 | 224.51   | 622.99    | 1640.58   | 5083.82    |
| 0.38 | 1178461.32     | 4202486.06      | 12234155.17     | 39602960.19      | 0.79 | 178.52   | 485.40    | 1227.61   | 3696.08    |
| 0.39 | 931253.06      | 3362206.09      | 9263268.75      | 30872254.09      | 0.80 | 140.25   | 368.57    | 918.91    | 2751.56    |
| 0.40 | 731766.42      | 2658679.19      | 7468278.32      | 24397688.27      | 0.81 | 108.21   | 281.49    | 694.91    | 2074.70    |
| 0.41 | 570482.55      | 2108536.12      | 5876787.26      | 19455272.73      | 0.82 | 84.40    | 212.72    | 526.11    | 1505.87    |
| 0.42 | 461858.65      | 1665128.45      | 4780083.89      | 15896789.69      | 0.83 | 66.44    | 160.86    | 382.35    | 1044.70    |
| 0.43 | 364441.18      | 1314180.97      | 3781245.78      | 12467709.57      | 0.84 | 51.01    | 119.30    | 273.56    | 770.01     |
| 0.44 | 291373.48      | 1057180.91      | 3054182.48      | 9745660.76       | 0.85 | 39.44    | 88.03     | 200.55    | 553.31     |
| 0.45 | 231567.16      | 839533.27       | 2446307.51      | 7857564.91       | 0.86 | 29.94    | 65.25     | 145.48    | 368.15     |
| 0.46 | 184997.58      | 681986.14       | 1992341.79      | 6383302.92       | 0.87 | 22.36    | 47.07     | 101.60    | 257.88     |
| 0.47 | 150600.39      | 554600.14       | 1646996.10      | 5159812.19       | 0.88 | 16.67    | 34.05     | 70.90     | 173.33     |
| 0.48 | 123340.17      | 446104.55       | 1313575.76      | 4227604.31       | 0.89 | 12.21    | 23.96     | 49.25     | 120.46     |
| 0.49 | 100438.68      | 359779.85       | 1058399.83      | 3363791.32       | 0.90 | 8.87     | 16.84     | 33.79     | 77.55      |
| 0.50 | 80914.73       | 293220.36       | 849452.95       | 2666601.62       |      |          |           |           |            |

Table S409: Critical values for detector  $\hat{H}_{mov,sn}^{m,0.1}$  with windows size  $n = 0.1$ , and IM-OLS estimation in a model with intercept and linear trend. The number of integrated regressors is 3 and the highest power of  $x_{kt}$  is 3.

| m    | 90 %          | 95 %           | 97,5 %         | 99 %            | m    | 90 %     | 95 %     | 97,5 %    | 99 %      |
|------|---------------|----------------|----------------|-----------------|------|----------|----------|-----------|-----------|
| 0.10 | 5819571380.65 | 20075618787.72 | 54259125251.44 | 164986613658.07 | 0.51 | 13754.45 | 46860.47 | 130445.63 | 378168.97 |
| 0.11 | 3062268435.54 | 10272428147.23 | 28532230151.38 | 90608328762.51  | 0.52 | 11125.70 | 37303.32 | 102093.27 | 308663.61 |
| 0.12 | 1689346893.90 | 5640446361.30  | 16161638716.45 | 49307419190.60  | 0.53 | 9072.52  | 28952.99 | 81533.59  | 250256.93 |
| 0.13 | 976659132.93  | 3257184708.48  | 9228906015.98  | 27945259539.87  | 0.54 | 7367.80  | 23371.55 | 66644.20  | 198379.56 |
| 0.14 | 559085592.26  | 1943734757.62  | 5628078634.65  | 17256523363.51  | 0.55 | 5997.85  | 19141.38 | 53524.79  | 158217.77 |
| 0.15 | 346942672.41  | 1193795342.37  | 3395764621.82  | 10732444120.59  | 0.56 | 4862.76  | 15278.59 | 42964.05  | 128366.86 |
| 0.16 | 220035041.37  | 759895863.68   | 2120342684.06  | 6832680876.95   | 0.57 | 4060.38  | 12597.32 | 34641.60  | 102743.60 |
| 0.17 | 141608482.89  | 489214890.82   | 1337921627.65  | 4365974095.67   | 0.58 | 3299.39  | 10289.63 | 27998.32  | 86718.48  |
| 0.18 | 93150582.77   | 328496413.07   | 889265964.84   | 2849238180.77   | 0.59 | 2683.16  | 8378.21  | 22613.21  | 68681.37  |
| 0.19 | 62469432.83   | 217022089.28   | 604331035.24   | 1951834047.03   | 0.60 | 2179.15  | 6818.01  | 18199.29  | 55663.92  |
| 0.20 | 43118133.05   | 149952442.89   | 416270856.56   | 1302842660.19   | 0.61 | 1795.91  | 5670.15  | 14769.21  | 45835.45  |
| 0.21 | 29993985.31   | 103111079.57   | 287504187.33   | 931949960.14    | 0.62 | 1480.12  | 4553.33  | 11923.58  | 36179.90  |
| 0.22 | 20963285.56   | 72680651.00    | 203738277.96   | 648649978.87    | 0.63 | 1199.32  | 3583.45  | 9432.61   | 28072.47  |
| 0.23 | 14800203.67   | 52233632.32    | 148271654.40   | 465193458.05    | 0.64 | 976.35   | 2876.02  | 7702.33   | 23008.87  |
| 0.24 | 10761265.95   | 37409870.41    | 106954092.08   | 335328716.43    | 0.65 | 794.73   | 2343.29  | 6139.97   | 17566.28  |
| 0.25 | 7866576.87    | 27834479.16    | 76455371.21    | 241895433.38    | 0.66 | 642.37   | 1825.23  | 4848.06   | 14107.62  |
| 0.26 | 5728832.64    | 20678612.34    | 57813716.52    | 176278314.82    | 0.67 | 526.46   | 1459.24  | 3797.58   | 11034.19  |
| 0.27 | 4301813.81    | 15238420.79    | 43150809.10    | 130332029.82    | 0.68 | 426.40   | 1158.67  | 2972.56   | 8589.55   |
| 0.28 | 3201506.75    | 11298066.58    | 31449109.61    | 99671870.53     | 0.69 | 341.60   | 938.44   | 2328.86   | 6607.97   |
| 0.29 | 2389525.51    | 8286184.01     | 23290105.49    | 71132448.72     | 0.70 | 279.57   | 748.88   | 1893.53   | 5392.58   |
| 0.30 | 1785520.49    | 6344144.46     | 17717375.56    | 52315951.94     | 0.71 | 227.12   | 599.55   | 1460.54   | 4194.73   |
| 0.31 | 1384055.76    | 4790012.77     | 13377320.44    | 42508471.34     | 0.72 | 185.23   | 471.29   | 1157.15   | 3220.09   |
| 0.32 | 1045391.42    | 3657476.17     | 10577133.35    | 32594010.91     | 0.73 | 149.51   | 376.47   | 930.68    | 2566.13   |
| 0.33 | 814894.30     | 2848222.72     | 7987044.17     | 24651501.61     | 0.74 | 120.37   | 295.76   | 710.34    | 1973.35   |
| 0.34 | 623151.48     | 2125865.66     | 6224792.72     | 19005770.82     | 0.75 | 96.32    | 233.38   | 546.31    | 1482.87   |
| 0.35 | 492356.66     | 1696412.31     | 4870305.71     | 14914947.31     | 0.76 | 77.28    | 184.97   | 427.96    | 1176.70   |
| 0.36 | 383960.52     | 1348854.88     | 3846330.72     | 11581844.90     | 0.77 | 61.13    | 144.88   | 330.04    | 910.46    |
| 0.37 | 308658.94     | 1060521.31     | 3022361.94     | 9324594.71      | 0.78 | 49.00    | 114.29   | 251.89    | 657.20    |
| 0.38 | 237952.93     | 826612.35      | 2358631.85     | 7316187.54      | 0.79 | 38.32    | 86.86    | 197.14    | 508.88    |
| 0.39 | 192848.03     | 655971.71      | 1831856.69     | 5751551.78      | 0.80 | 30.51    | 67.17    | 147.82    | 378.49    |
| 0.40 | 150764.56     | 518885.71      | 1411646.97     | 4591844.76      | 0.81 | 23.48    | 51.43    | 110.43    | 284.90    |
| 0.41 | 122078.76     | 417384.13      | 1116637.46     | 3464550.76      | 0.82 | 18.34    | 39.10    | 83.96     | 221.66    |
| 0.42 | 96772.55      | 331595.44      | 895582.97      | 2779476.84      | 0.83 | 14.16    | 29.39    | 62.00     | 159.91    |
| 0.43 | 76685.48      | 262783.28      | 718841.94      | 2182413.18      | 0.84 | 10.86    | 22.08    | 45.42     | 112.97    |
| 0.44 | 61213.85      | 210630.06      | 587778.34      | 1713889.40      | 0.85 | 8.34     | 16.40    | 33.17     | 83.19     |
| 0.45 | 48854.14      | 166856.89      | 468233.48      | 1414261.65      | 0.86 | 6.31     | 11.89    | 22.89     | 56.51     |
| 0.46 | 39864.24      | 133691.13      | 362590.94      | 1108022.30      | 0.87 | 4.72     | 8.69     | 16.37     | 38.85     |
| 0.47 | 32407.99      | 105590.40      | 289723.83      | 910442.51       | 0.88 | 3.50     | 6.29     | 11.54     | 26.89     |
| 0.48 | 25762.01      | 85777.63       | 242614.83      | 749860.60       | 0.89 | 2.60     | 4.54     | 7.89      | 17.46     |
| 0.49 | 20684.21      | 71345.39       | 197138.18      | 597664.44       | 0.90 | 1.89     | 3.21     | 5.44      | 11.34     |
| 0.50 | 16858.87      | 57091.30       | 165574.37      | 484468.13       |      |          |          |           |           |

Table S410: Critical values for detector  $\hat{H}_{mov,sn}^{m,0.2}$  with windows size  $n = 0.2$ , and FM-OLS and D-OLS estimation in a model with intercept and linear trend. The number of integrated regressors is 3 and the highest power of  $x_{kt}$  is 3.

| m    | 90 %           | 95 %            | 97,5 %          | 99 %             | m    | 90 %     | 95 %      | 97,5 %    | 99 %       |
|------|----------------|-----------------|-----------------|------------------|------|----------|-----------|-----------|------------|
| 0.10 | 40001531092.82 | 142067902697.61 | 420097637830.69 | 1418215987450.10 | 0.51 | 86023.89 | 308961.60 | 882893.05 | 2878015.57 |
| 0.11 | 20724593446.51 | 73838488475.95  | 223501761514.13 | 740028831655.35  | 0.52 | 69803.20 | 245323.78 | 721403.19 | 2365791.74 |
| 0.12 | 11488342682.31 | 41076893244.57  | 121477972157.12 | 414138984617.09  | 0.53 | 57268.71 | 201478.54 | 585598.60 | 1923558.68 |
| 0.13 | 6453610617.40  | 23652437421.97  | 70606720152.58  | 238922126987.94  | 0.54 | 46729.84 | 164994.02 | 474365.86 | 1573071.18 |
| 0.14 | 3782199619.74  | 13925876361.36  | 40639299925.27  | 141375891073.31  | 0.55 | 38081.13 | 135691.94 | 382695.83 | 1255712.31 |
| 0.15 | 2319852133.05  | 8423859292.93   | 25742067715.73  | 84760823905.01   | 0.56 | 30954.70 | 106778.19 | 308538.44 | 1008998.36 |
| 0.16 | 1447990487.83  | 5248549885.92   | 15997497550.27  | 55896106072.44   | 0.57 | 25309.01 | 85700.82  | 243048.32 | 778230.52  |
| 0.17 | 949985149.10   | 3450155945.42   | 9990421707.09   | 33431102000.49   | 0.58 | 20420.92 | 69706.78  | 196996.55 | 615681.65  |
| 0.18 | 625203889.35   | 2253337321.45   | 6838932537.70   | 22040148878.54   | 0.59 | 16616.46 | 57336.75  | 165906.92 | 501145.94  |
| 0.19 | 422037281.25   | 1511841994.26   | 4435638842.31   | 15542282460.91   | 0.60 | 13543.14 | 46473.51  | 133725.92 | 404081.68  |
| 0.20 | 283016279.14   | 1061467410.03   | 3075046567.85   | 10670941219.98   | 0.61 | 11217.53 | 37999.27  | 105918.15 | 334032.50  |
| 0.21 | 197302973.55   | 733683477.43    | 2190953497.73   | 7209563217.02    | 0.62 | 9254.70  | 31215.37  | 85712.16  | 266591.62  |
| 0.22 | 139851547.49   | 515400433.00    | 1538668797.64   | 5120577341.01    | 0.63 | 7337.32  | 24916.79  | 70093.73  | 219278.64  |
| 0.23 | 98294529.06    | 361329519.50    | 1057433557.41   | 3613111983.53    | 0.64 | 5823.23  | 19898.95  | 55938.97  | 172999.92  |
| 0.24 | 71026849.64    | 261789310.22    | 773596541.00    | 2586221351.56    | 0.65 | 4738.28  | 15973.36  | 45163.90  | 135955.45  |
| 0.25 | 51382293.98    | 192780898.66    | 577500345.12    | 1955520298.83    | 0.66 | 3764.24  | 12779.80  | 35861.15  | 107263.46  |
| 0.26 | 37766332.81    | 138861819.61    | 415304294.93    | 1440911102.77    | 0.67 | 3027.36  | 10045.52  | 28625.85  | 87500.54   |
| 0.27 | 27875389.62    | 99996429.93     | 306234190.49    | 1091654596.79    | 0.68 | 2411.14  | 7908.57   | 22228.27  | 68790.47   |
| 0.28 | 20570916.88    | 75170412.32     | 228150837.31    | 785764065.04     | 0.69 | 1919.37  | 6266.14   | 17290.06  | 55188.28   |
| 0.29 | 15697449.57    | 57298143.96     | 168075922.41    | 564124510.66     | 0.70 | 1556.56  | 4967.08   | 13580.74  | 43937.47   |
| 0.30 | 11840203.04    | 42291449.03     | 124776061.13    | 413442221.47     | 0.71 | 1249.44  | 3833.55   | 10506.46  | 34409.15   |
| 0.31 | 9006101.44     | 31978252.74     | 93944757.08     | 309435649.91     | 0.72 | 1004.86  | 3085.85   | 8422.30   | 26590.66   |
| 0.32 | 6862847.33     | 24629882.85     | 72866761.58     | 250780459.40     | 0.73 | 803.93   | 2402.34   | 6486.19   | 20526.80   |
| 0.33 | 5255482.06     | 19398088.55     | 56941610.00     | 188905903.03     | 0.74 | 640.77   | 1889.61   | 5137.09   | 15557.78   |
| 0.34 | 4109232.39     | 14786371.06     | 44325531.32     | 147860509.40     | 0.75 | 505.07   | 1445.49   | 3967.78   | 12151.05   |
| 0.35 | 3207658.02     | 11337065.30     | 33688359.58     | 113451201.10     | 0.76 | 401.22   | 1138.16   | 3045.96   | 9312.19    |
| 0.36 | 2539756.58     | 8865043.24      | 26050645.59     | 86478248.73      | 0.77 | 319.60   | 883.42    | 2333.58   | 7204.53    |
| 0.37 | 2003927.66     | 7123224.07      | 20329249.46     | 67464135.52      | 0.78 | 251.62   | 683.65    | 1764.19   | 5422.90    |
| 0.38 | 1571750.43     | 5679522.53      | 16441455.82     | 54403337.79      | 0.79 | 197.69   | 528.40    | 1320.44   | 3879.25    |
| 0.39 | 1254915.01     | 4522089.41      | 12546283.20     | 42005799.15      | 0.80 | 153.06   | 394.62    | 980.47    | 2883.70    |
| 0.40 | 983235.96      | 3558655.22      | 10112960.71     | 33248159.32      | 0.81 | 117.40   | 298.96    | 727.20    | 2169.72    |
| 0.41 | 761987.75      | 2802100.65      | 7981242.85      | 26218916.48      | 0.82 | 90.55    | 224.53    | 545.18    | 1542.46    |
| 0.42 | 618313.19      | 2229430.95      | 6367186.83      | 21255896.11      | 0.83 | 70.53    | 167.25    | 395.69    | 1071.64    |
| 0.43 | 488950.09      | 1757283.40      | 5092999.70      | 16651890.38      | 0.84 | 53.60    | 123.58    | 280.37    | 782.29     |
| 0.44 | 387656.76      | 1412954.52      | 4108207.57      | 13025268.16      | 0.85 | 41.01    | 90.48     | 204.61    | 560.27     |
| 0.45 | 307767.75      | 1126248.64      | 3281287.77      | 10363357.75      | 0.86 | 30.84    | 66.52     | 147.47    | 372.43     |
| 0.46 | 245507.96      | 905016.61       | 2668319.56      | 8547801.57       | 0.87 | 22.87    | 47.79     | 102.43    | 259.15     |
| 0.47 | 198050.37      | 724198.97       | 2169209.17      | 6885571.78       | 0.88 | 16.99    | 34.39     | 71.31     | 174.43     |
| 0.48 | 162287.78      | 591408.18       | 1746354.00      | 5591858.80       | 0.89 | 12.37    | 24.15     | 49.48     | 120.62     |
| 0.49 | 131312.49      | 476140.09       | 1402142.33      | 4395016.73       | 0.90 | 8.97     | 16.97     | 33.88     | 77.64      |
| 0.50 | 106030.74      | 384797.32       | 1109430.60      | 3461038.91       |      |          |           |           |            |

Table S411: Critical values for detector  $\hat{H}_{mov,sn}^{m,0.2}$  with windows size  $n = 0.2$ , and IM-OLS estimation in a model with intercept and linear trend. The number of integrated regressors is 3 and the highest power of  $x_{kt}$  is 3.

| m    | 90 %          | 95 %           | 97,5 %         | 99 %            | m    | 90 %     | 95 %     | 97,5 %    | 99 %      |
|------|---------------|----------------|----------------|-----------------|------|----------|----------|-----------|-----------|
| 0.10 | 6252755657.89 | 21598586109.54 | 59062508206.49 | 184164369668.14 | 0.51 | 14644.81 | 49551.61 | 136477.65 | 397177.96 |
| 0.11 | 3288796381.65 | 11217627631.98 | 31377605984.23 | 100118228581.86 | 0.52 | 11778.29 | 39353.19 | 107629.76 | 323084.51 |
| 0.12 | 1818260992.64 | 6105445388.80  | 17572324027.51 | 54279199116.08  | 0.53 | 9608.47  | 30336.72 | 85942.04  | 260544.21 |
| 0.13 | 1052982371.78 | 3529083973.18  | 10081781419.73 | 30731777036.39  | 0.54 | 7756.64  | 24474.40 | 69389.50  | 208009.68 |
| 0.14 | 604778724.28  | 2108545553.61  | 6138352903.52  | 19101829304.45  | 0.55 | 6337.56  | 20106.61 | 55712.13  | 163778.69 |
| 0.15 | 374078076.66  | 1296999356.80  | 3719499391.23  | 11833629663.23  | 0.56 | 5138.33  | 15883.80 | 44602.35  | 133946.07 |
| 0.16 | 237668997.99  | 824018258.00   | 2316839796.07  | 7540930934.70   | 0.57 | 4263.77  | 13088.46 | 35864.62  | 107533.29 |
| 0.17 | 153003886.16  | 534015623.64   | 1462451854.68  | 4780420134.17   | 0.58 | 3453.48  | 10718.21 | 28735.81  | 89626.24  |
| 0.18 | 100665938.85  | 357415209.27   | 975373628.94   | 3145535321.80   | 0.59 | 2803.27  | 8655.71  | 23243.97  | 71098.90  |
| 0.19 | 67362592.23   | 236390708.58   | 653771289.44   | 2153948594.46   | 0.60 | 2271.11  | 7065.85  | 18723.45  | 56945.27  |
| 0.20 | 46675851.23   | 163581182.90   | 455909203.29   | 1434305561.24   | 0.61 | 1858.81  | 5832.80  | 15273.97  | 47208.87  |
| 0.21 | 32375105.25   | 112409909.29   | 315274190.67   | 1025318677.67   | 0.62 | 1535.70  | 4696.60  | 12213.35  | 36928.09  |
| 0.22 | 22706968.68   | 79654854.60    | 224315405.10   | 711191292.84    | 0.63 | 1238.78  | 3683.94  | 9670.50   | 28854.66  |
| 0.23 | 15994549.17   | 56480725.16    | 162700915.69   | 511250546.69    | 0.64 | 1005.47  | 2947.26  | 7863.49   | 23433.26  |
| 0.24 | 11651782.84   | 40799408.93    | 116485114.27   | 370200217.02    | 0.65 | 820.52   | 2387.96  | 6261.94   | 17863.71  |
| 0.25 | 8541301.95    | 30227518.72    | 84663694.11    | 263804071.05    | 0.66 | 658.80   | 1863.15  | 4914.32   | 14247.72  |
| 0.26 | 6200704.56    | 22301163.19    | 63387592.76    | 193425373.90    | 0.67 | 538.19   | 1492.97  | 3846.66   | 11150.46  |
| 0.27 | 4653809.66    | 16556416.85    | 46990974.37    | 143681372.98    | 0.68 | 435.09   | 1175.42  | 3010.74   | 8672.41   |
| 0.28 | 3483626.84    | 12272197.83    | 34306921.83    | 108652723.46    | 0.69 | 347.58   | 953.05   | 2344.02   | 6650.48   |
| 0.29 | 2583914.43    | 9025882.76     | 25137131.66    | 77763916.79     | 0.70 | 283.68   | 756.86   | 1903.96   | 5418.32   |
| 0.30 | 1928284.22    | 6839981.19     | 19308801.20    | 57533722.47     | 0.71 | 229.90   | 605.04   | 1469.16   | 4210.92   |
| 0.31 | 1490431.65    | 5187230.60     | 14497787.94    | 46512111.71     | 0.72 | 187.01   | 474.09   | 1162.70   | 3234.29   |
| 0.32 | 1132742.76    | 3963142.12     | 11495897.22    | 35541253.23     | 0.73 | 150.63   | 378.49   | 933.75    | 2571.98   |
| 0.33 | 879438.30     | 3066616.20     | 8609598.73     | 26777034.72     | 0.74 | 121.12   | 296.49   | 711.28    | 1975.54   |
| 0.34 | 670113.56     | 2293097.52     | 6797285.29     | 20766044.56     | 0.75 | 96.74    | 234.14   | 546.95    | 1484.39   |
| 0.35 | 527755.34     | 1823586.75     | 5258089.17     | 16087034.89     | 0.76 | 77.54    | 185.29   | 428.27    | 1177.52   |
| 0.36 | 412006.22     | 1447208.05     | 4167685.21     | 12509604.88     | 0.77 | 61.33    | 145.02   | 330.23    | 911.00    |
| 0.37 | 331656.63     | 1140333.53     | 3292592.32     | 10149751.87     | 0.78 | 49.11    | 114.37   | 252.00    | 657.39    |
| 0.38 | 255825.50     | 889758.57      | 2551338.33     | 7971166.82      | 0.79 | 38.41    | 86.95    | 197.22    | 508.95    |
| 0.39 | 206374.29     | 706251.04      | 1961297.10     | 6110985.03      | 0.80 | 30.64    | 67.24    | 147.94    | 378.57    |
| 0.40 | 161884.35     | 554863.88      | 1521893.83     | 4921235.81      | 0.81 | 23.58    | 51.53    | 110.64    | 285.15    |
| 0.41 | 130963.28     | 447326.87      | 1205927.60     | 3788268.91      | 0.82 | 18.46    | 39.19    | 84.08     | 221.79    |
| 0.42 | 104079.66     | 354991.06      | 965541.35      | 2980725.11      | 0.83 | 14.29    | 29.52    | 62.11     | 160.08    |
| 0.43 | 81640.35      | 281813.78      | 766529.31      | 2337500.15      | 0.84 | 10.98    | 22.21    | 45.54     | 113.13    |
| 0.44 | 65479.87      | 225608.90      | 627435.60      | 1835494.59      | 0.85 | 8.46     | 16.54    | 33.26     | 83.37     |
| 0.45 | 52448.08      | 179589.84      | 498815.72      | 1497019.72      | 0.86 | 6.44     | 12.00    | 23.05     | 56.64     |
| 0.46 | 42665.11      | 142229.78      | 386726.29      | 1172976.86      | 0.87 | 4.84     | 8.81     | 16.52     | 38.94     |
| 0.47 | 34559.16      | 112366.40      | 306263.97      | 959359.65       | 0.88 | 3.63     | 6.42     | 11.64     | 27.03     |
| 0.48 | 27584.40      | 91052.06       | 257220.41      | 788399.40       | 0.89 | 2.72     | 4.66     | 7.99      | 17.59     |
| 0.49 | 22030.45      | 75357.89       | 208360.31      | 625473.03       | 0.90 | 2.01     | 3.33     | 5.58      | 11.47     |
| 0.50 | 17844.55      | 60771.84       | 174790.09      | 509025.15       |      |          |          |           |           |

Table S412: Critical values for detector  $\hat{H}_{mov,sn}^{m,0.3}$  with windows size  $n = 0.3$ , and FM-OLS and D-OLS estimation in a model with intercept and linear trend. The number of integrated regressors is 3 and the highest power of  $x_{kt}$  is 3.

| m    | 90 %           | 95 %            | 97,5 %          | 99 %             | m    | 90 %     | 95 %      | 97,5 %    | 99 %       |
|------|----------------|-----------------|-----------------|------------------|------|----------|-----------|-----------|------------|
| 0.10 | 43033437037.10 | 154092073168.08 | 457798851134.49 | 1554399361433.51 | 0.51 | 90787.14 | 324669.80 | 934263.87 | 3038987.26 |
| 0.11 | 22352850312.99 | 80516075310.64  | 244283690079.74 | 819080705238.58  | 0.52 | 73632.81 | 257945.34 | 753763.02 | 2473657.54 |
| 0.12 | 12346158625.73 | 44634767073.50  | 133513628805.79 | 467653857532.76  | 0.53 | 60369.37 | 211100.87 | 614366.01 | 2011300.84 |
| 0.13 | 6937471483.01  | 25483921229.08  | 76903130402.14  | 262023528320.72  | 0.54 | 48935.03 | 172942.37 | 494949.20 | 1642858.75 |
| 0.14 | 4088808074.46  | 15140568617.92  | 44217874717.96  | 156547471783.95  | 0.55 | 39896.62 | 141394.87 | 398912.38 | 1308002.27 |
| 0.15 | 2503569535.50  | 9160352862.42   | 28299409807.59  | 93864177284.71   | 0.56 | 32438.06 | 111233.69 | 320771.55 | 1050838.99 |
| 0.16 | 1561975114.88  | 5742618804.65   | 17478789873.85  | 61718555437.85   | 0.57 | 26519.66 | 89443.02  | 251546.70 | 808645.80  |
| 0.17 | 1028923193.77  | 3732231310.68   | 10922671017.86  | 36934896865.50   | 0.58 | 21346.59 | 72160.47  | 203828.49 | 641308.91  |
| 0.18 | 675002530.13   | 2456946991.47   | 7524651251.71   | 24420121373.15   | 0.59 | 17268.41 | 59129.41  | 171244.46 | 512025.21  |
| 0.19 | 456455674.63   | 1657827613.17   | 4848874612.27   | 17227524164.77   | 0.60 | 14046.68 | 47935.74  | 137448.12 | 414090.64  |
| 0.20 | 306789925.39   | 1151037658.80   | 3366299958.39   | 11699732634.18   | 0.61 | 11625.17 | 39290.41  | 108419.64 | 340199.81  |
| 0.21 | 212355006.24   | 796563716.95    | 2404458884.26   | 7891842256.47    | 0.62 | 9566.32  | 32165.56  | 87379.40  | 272584.55  |
| 0.22 | 151117484.92   | 561216315.04    | 1682361811.96   | 5625085711.07    | 0.63 | 7596.28  | 25519.03  | 71459.59  | 222638.10  |
| 0.23 | 106020684.77   | 394144135.67    | 1162700952.46   | 3938584970.97    | 0.64 | 6012.72  | 20348.43  | 56917.65  | 175575.71  |
| 0.24 | 77009594.77    | 283618286.84    | 843987932.42    | 2822537332.10    | 0.65 | 4858.69  | 16255.11  | 45978.92  | 137106.71  |
| 0.25 | 55653139.41    | 208754429.86    | 625370732.13    | 2163259278.48    | 0.66 | 3864.30  | 13014.86  | 36338.89  | 109063.38  |
| 0.26 | 40694340.02    | 151025045.00    | 453667313.49    | 1569552686.28    | 0.67 | 3093.76  | 10241.78  | 28927.98  | 88685.02   |
| 0.27 | 30014745.88    | 108496835.29    | 333400018.97    | 1188397826.57    | 0.68 | 2456.52  | 8014.16   | 22646.01  | 69279.36   |
| 0.28 | 22166716.40    | 81191122.95     | 246845426.40    | 857392205.80     | 0.69 | 1948.91  | 6344.30   | 17425.59  | 55462.99   |
| 0.29 | 16842661.42    | 62491300.23     | 184000327.72    | 611696439.68     | 0.70 | 1577.29  | 5018.13   | 13705.38  | 44038.45   |
| 0.30 | 12807815.88    | 45883907.33     | 134526766.69    | 453066160.57     | 0.71 | 1263.32  | 3865.85   | 10567.75  | 34459.17   |
| 0.31 | 9700013.67     | 34760000.64     | 102816337.51    | 340476477.00     | 0.72 | 1012.78  | 3098.90   | 8443.89   | 26619.90   |
| 0.32 | 7363287.38     | 26561923.97     | 79312808.55     | 272971668.20     | 0.73 | 809.98   | 2410.35   | 6503.28   | 20542.80   |
| 0.33 | 5649579.23     | 20907555.40     | 61696943.05     | 206400503.93     | 0.74 | 644.78   | 1895.01   | 5142.29   | 15593.11   |
| 0.34 | 4415388.73     | 15852667.25     | 47983916.29     | 160334655.44     | 0.75 | 507.14   | 1448.79   | 3969.48   | 12153.40   |
| 0.35 | 3460534.87     | 12249803.92     | 36596825.92     | 123496967.26     | 0.76 | 402.23   | 1140.00   | 3049.38   | 9314.34    |
| 0.36 | 2720968.36     | 9616712.52      | 28268676.19     | 93271140.33      | 0.77 | 320.18   | 883.87    | 2334.02   | 7206.24    |
| 0.37 | 2158204.32     | 7727202.57      | 22092948.80     | 72984311.52      | 0.78 | 252.10   | 683.77    | 1764.60   | 5424.48    |
| 0.38 | 1689069.75     | 6131308.72      | 17640177.80     | 58617609.60      | 0.79 | 197.88   | 528.52    | 1320.50   | 3879.53    |
| 0.39 | 1344139.55     | 4882014.87      | 13476574.90     | 45151250.55      | 0.80 | 153.23   | 394.69    | 980.58    | 2883.80    |
| 0.40 | 1055060.57     | 3816376.84      | 10852230.03     | 36145349.09      | 0.81 | 117.51   | 299.06    | 727.28    | 2169.84    |
| 0.41 | 817557.24      | 3011933.83      | 8547415.03      | 27955024.41      | 0.82 | 90.65    | 224.65    | 545.25    | 1542.59    |
| 0.42 | 659980.35      | 2377018.88      | 6841597.46      | 22706755.54      | 0.83 | 70.65    | 167.38    | 395.84    | 1071.75    |
| 0.43 | 520167.55      | 1884535.99      | 5492723.74      | 17785206.22      | 0.84 | 53.73    | 123.67    | 280.47    | 782.38     |
| 0.44 | 413691.01      | 1508141.56      | 4403648.62      | 13954668.72      | 0.85 | 41.12    | 90.62     | 204.75    | 560.39     |
| 0.45 | 327830.71      | 1194893.60      | 3492494.66      | 11057980.38      | 0.86 | 30.96    | 66.60     | 147.58    | 372.55     |
| 0.46 | 261000.53      | 973013.95       | 2838376.54      | 9073090.30       | 0.87 | 23.00    | 47.88     | 102.58    | 259.28     |
| 0.47 | 210535.64      | 775851.69       | 2306269.94      | 7341256.62       | 0.88 | 17.10    | 34.50     | 71.41     | 174.59     |
| 0.48 | 172850.89      | 629647.35       | 1846023.35      | 5900947.53       | 0.89 | 12.48    | 24.26     | 49.60     | 120.68     |
| 0.49 | 139069.88      | 504358.86       | 1478268.80      | 4664235.06       | 0.90 | 9.08     | 17.07     | 33.95     | 77.78      |
| 0.50 | 111742.39      | 405147.00       | 1163127.81      | 3665278.11       |      |          |           |           |            |

Table S413: Critical values for detector  $\hat{H}_{mov,sn}^{m,0.3}$  with windows size  $n = 0.3$ , and IM-OLS estimation in a model with intercept and linear trend. The number of integrated regressors is 3 and the highest power of  $x_{kt}$  is 3.

## 5.4 Number of I(1) regressors: 4

| m    | 90 %       | 95 %       | 97,5 %     | 99 %       | m    | 90 %   | 95 %   | 97,5 % | 99 %    |
|------|------------|------------|------------|------------|------|--------|--------|--------|---------|
| 0.10 | 1415926.11 | 2333219.70 | 3575095.53 | 5714436.43 | 0.51 | 352.00 | 594.44 | 909.31 | 1448.37 |
| 0.11 | 928512.51  | 1548243.40 | 2369208.40 | 3773151.88 | 0.52 | 310.51 | 519.02 | 789.18 | 1275.83 |
| 0.12 | 636634.65  | 1057993.17 | 1616859.28 | 2583479.63 | 0.53 | 270.70 | 449.27 | 695.75 | 1113.87 |
| 0.13 | 444726.23  | 741756.89  | 1141658.67 | 1796729.02 | 0.54 | 237.22 | 393.43 | 604.52 | 964.39  |
| 0.14 | 317117.79  | 535424.00  | 810540.65  | 1287839.91 | 0.55 | 209.27 | 345.03 | 518.76 | 830.29  |
| 0.15 | 230340.59  | 393058.38  | 600358.71  | 958084.03  | 0.56 | 182.57 | 304.19 | 455.84 | 728.78  |
| 0.16 | 172109.00  | 286833.80  | 444175.87  | 709106.70  | 0.57 | 159.81 | 265.99 | 402.45 | 635.43  |
| 0.17 | 128314.27  | 216119.07  | 334488.24  | 535891.14  | 0.58 | 138.76 | 229.11 | 347.62 | 549.86  |
| 0.18 | 98998.21   | 165420.73  | 252918.85  | 414259.89  | 0.59 | 122.60 | 200.01 | 302.73 | 476.36  |
| 0.19 | 76125.96   | 128328.41  | 196225.00  | 318020.97  | 0.60 | 107.79 | 175.89 | 264.76 | 418.12  |
| 0.20 | 60053.28   | 99482.33   | 151552.51  | 249317.44  | 0.61 | 94.54  | 155.58 | 232.13 | 362.11  |
| 0.21 | 47670.52   | 79602.53   | 121696.54  | 198701.18  | 0.62 | 83.29  | 136.02 | 202.09 | 320.24  |
| 0.22 | 37845.20   | 63958.17   | 98097.32   | 155955.77  | 0.63 | 72.31  | 119.45 | 179.29 | 280.74  |
| 0.23 | 30683.68   | 51365.61   | 78079.67   | 124163.25  | 0.64 | 63.50  | 104.38 | 155.24 | 244.95  |
| 0.24 | 24886.94   | 41842.79   | 63843.87   | 102036.81  | 0.65 | 55.74  | 90.61  | 135.66 | 212.79  |
| 0.25 | 20026.97   | 33677.07   | 52113.51   | 83579.65   | 0.66 | 48.15  | 79.07  | 118.67 | 185.28  |
| 0.26 | 16523.00   | 27782.18   | 42869.84   | 70078.53   | 0.67 | 41.88  | 68.49  | 103.26 | 158.88  |
| 0.27 | 13700.95   | 22951.21   | 35280.55   | 57088.69   | 0.68 | 36.78  | 59.36  | 89.40  | 142.07  |
| 0.28 | 11345.49   | 19237.71   | 29603.93   | 47288.23   | 0.69 | 32.02  | 52.40  | 76.97  | 123.41  |
| 0.29 | 9480.57    | 16134.86   | 24507.67   | 40108.10   | 0.70 | 27.97  | 45.65  | 68.21  | 107.49  |
| 0.30 | 7913.17    | 13331.27   | 20246.98   | 33214.39   | 0.71 | 24.41  | 39.43  | 58.43  | 90.53   |
| 0.31 | 6685.91    | 11171.32   | 17004.54   | 28311.11   | 0.72 | 20.98  | 34.02  | 50.89  | 78.72   |
| 0.32 | 5614.96    | 9444.29    | 14400.42   | 23542.34   | 0.73 | 18.18  | 28.92  | 43.51  | 68.53   |
| 0.33 | 4743.96    | 8034.65    | 12240.51   | 19934.42   | 0.74 | 15.80  | 25.32  | 37.56  | 58.24   |
| 0.34 | 4052.31    | 6843.99    | 10440.35   | 17130.48   | 0.75 | 13.67  | 21.85  | 32.17  | 50.07   |
| 0.35 | 3459.33    | 5798.50    | 8893.42    | 14683.94   | 0.76 | 11.79  | 18.84  | 27.46  | 42.56   |
| 0.36 | 2976.05    | 4937.65    | 7608.89    | 12158.78   | 0.77 | 10.19  | 15.97  | 23.33  | 35.68   |
| 0.37 | 2503.64    | 4227.39    | 6459.74    | 10456.74   | 0.78 | 8.64   | 13.63  | 19.62  | 30.12   |
| 0.38 | 2172.07    | 3614.78    | 5530.13    | 8919.47    | 0.79 | 7.34   | 11.58  | 16.73  | 24.98   |
| 0.39 | 1882.77    | 3132.54    | 4760.85    | 7695.30    | 0.80 | 6.21   | 9.79   | 14.05  | 20.57   |
| 0.40 | 1621.02    | 2727.42    | 4136.73    | 6617.83    | 0.81 | 5.23   | 8.19   | 11.83  | 17.49   |
| 0.41 | 1402.45    | 2336.61    | 3599.28    | 5880.84    | 0.82 | 4.38   | 6.84   | 9.82   | 14.53   |
| 0.42 | 1217.56    | 2031.31    | 3133.56    | 5102.84    | 0.83 | 3.64   | 5.65   | 8.10   | 12.00   |
| 0.43 | 1051.00    | 1764.38    | 2704.51    | 4385.41    | 0.84 | 3.00   | 4.68   | 6.72   | 9.91    |
| 0.44 | 916.97     | 1537.13    | 2363.02    | 3841.91    | 0.85 | 2.44   | 3.81   | 5.49   | 8.05    |
| 0.45 | 796.74     | 1335.81    | 2029.92    | 3329.38    | 0.86 | 2.00   | 3.09   | 4.42   | 6.48    |
| 0.46 | 690.07     | 1160.73    | 1773.56    | 2876.34    | 0.87 | 1.60   | 2.46   | 3.49   | 5.11    |
| 0.47 | 600.51     | 1006.67    | 1551.37    | 2493.61    | 0.88 | 1.26   | 1.93   | 2.73   | 3.99    |
| 0.48 | 524.26     | 886.14     | 1369.95    | 2186.23    | 0.89 | 0.97   | 1.47   | 2.08   | 3.04    |
| 0.49 | 459.20     | 777.52     | 1189.09    | 1904.55    | 0.90 | 0.74   | 1.12   | 1.58   | 2.31    |
| 0.50 | 404.04     | 675.97     | 1038.26    | 1653.48    |      |        |        |        |         |

Table S414: Critical values for detector  $\hat{H}_{mov,sn}^{m,0.1}$  with windows size  $n = 0.1$ , and FM-OLS and D-OLS estimation in a model with intercept. The number of integrated regressors is 4 and the highest power of  $x_{kt}$  is 1.

| m    | 90 %       | 95 %        | 97,5 %      | 99 %        | m    | 90 %    | 95 %    | 97,5 %  | 99 %    |
|------|------------|-------------|-------------|-------------|------|---------|---------|---------|---------|
| 0.10 | 6718589.74 | 11080622.71 | 16861155.77 | 27089391.83 | 0.51 | 1637.68 | 2697.72 | 4065.81 | 6422.81 |
| 0.11 | 4404335.11 | 7292715.91  | 11106720.68 | 17995174.08 | 0.52 | 1430.70 | 2364.92 | 3569.36 | 5635.60 |
| 0.12 | 3006795.06 | 4981310.54  | 7497083.28  | 12078926.36 | 0.53 | 1258.16 | 2081.15 | 3136.18 | 4975.32 |
| 0.13 | 2100148.49 | 3441484.21  | 5227579.46  | 8462431.24  | 0.54 | 1109.14 | 1825.85 | 2759.90 | 4352.40 |
| 0.14 | 1499285.62 | 2460151.56  | 3778659.30  | 6144883.53  | 0.55 | 971.64  | 1598.80 | 2389.63 | 3772.97 |
| 0.15 | 1082620.66 | 1798441.74  | 2763998.33  | 4458680.57  | 0.56 | 850.44  | 1394.38 | 2091.04 | 3268.20 |
| 0.16 | 802815.41  | 1336773.21  | 2049031.42  | 3343541.03  | 0.57 | 748.00  | 1219.86 | 1821.71 | 2852.03 |
| 0.17 | 609340.52  | 1004916.69  | 1536391.84  | 2528942.59  | 0.58 | 652.05  | 1060.35 | 1593.59 | 2482.60 |
| 0.18 | 463747.48  | 773934.51   | 1181339.66  | 1899879.17  | 0.59 | 571.69  | 924.91  | 1392.72 | 2166.77 |
| 0.19 | 360524.82  | 596857.71   | 905221.09   | 1446625.72  | 0.60 | 501.08  | 814.06  | 1208.83 | 1887.55 |
| 0.20 | 283914.49  | 471599.75   | 714789.53   | 1141288.02  | 0.61 | 438.39  | 710.44  | 1058.27 | 1626.19 |
| 0.21 | 223824.62  | 374451.11   | 566370.25   | 900706.28   | 0.62 | 384.71  | 627.97  | 926.99  | 1413.50 |
| 0.22 | 178020.51  | 297440.99   | 453040.61   | 714767.94   | 0.63 | 338.65  | 550.18  | 810.28  | 1255.03 |
| 0.23 | 143799.96  | 238592.83   | 363967.52   | 579412.43   | 0.64 | 295.95  | 478.77  | 710.63  | 1083.59 |
| 0.24 | 116007.61  | 193883.53   | 296671.32   | 477227.14   | 0.65 | 258.19  | 419.10  | 620.52  | 947.48  |
| 0.25 | 95075.88   | 159315.01   | 243031.49   | 388413.44   | 0.66 | 225.43  | 363.09  | 536.46  | 826.20  |
| 0.26 | 78173.48   | 130430.80   | 200532.85   | 316857.78   | 0.67 | 197.27  | 316.82  | 468.94  | 719.44  |
| 0.27 | 64536.33   | 107571.85   | 161793.81   | 259516.99   | 0.68 | 171.74  | 276.42  | 403.64  | 627.94  |
| 0.28 | 53845.11   | 88402.71    | 134748.56   | 214779.58   | 0.69 | 149.46  | 238.32  | 348.71  | 538.81  |
| 0.29 | 44431.36   | 74095.16    | 113201.71   | 179092.23   | 0.70 | 129.16  | 206.23  | 305.01  | 468.35  |
| 0.30 | 37076.64   | 62168.32    | 94821.96    | 151152.55   | 0.71 | 112.17  | 179.05  | 264.02  | 405.63  |
| 0.31 | 31016.16   | 52461.47    | 80057.64    | 127514.55   | 0.72 | 97.16   | 155.11  | 226.50  | 350.23  |
| 0.32 | 26455.61   | 43945.50    | 67698.41    | 107775.97   | 0.73 | 84.28   | 133.37  | 194.77  | 298.15  |
| 0.33 | 22383.68   | 37161.86    | 57288.19    | 91162.71    | 0.74 | 72.72   | 115.34  | 167.43  | 255.94  |
| 0.34 | 18907.60   | 31518.29    | 48468.94    | 77701.32    | 0.75 | 63.02   | 98.86   | 143.38  | 219.98  |
| 0.35 | 15949.01   | 27076.67    | 41053.41    | 65927.14    | 0.76 | 53.94   | 84.28   | 122.80  | 186.32  |
| 0.36 | 13661.38   | 22976.15    | 35051.05    | 56743.99    | 0.77 | 46.16   | 72.46   | 105.65  | 158.36  |
| 0.37 | 11732.76   | 19436.14    | 30039.72    | 47528.88    | 0.78 | 39.70   | 61.87   | 89.49   | 133.35  |
| 0.38 | 10112.76   | 16765.31    | 25431.86    | 40422.78    | 0.79 | 33.79   | 52.12   | 75.05   | 112.41  |
| 0.39 | 8712.49    | 14347.30    | 21860.94    | 34844.85    | 0.80 | 28.71   | 44.22   | 62.95   | 93.63   |
| 0.40 | 7478.21    | 12544.44    | 18845.57    | 30471.94    | 0.81 | 24.23   | 37.19   | 52.65   | 77.31   |
| 0.41 | 6507.86    | 10824.68    | 16531.66    | 26799.58    | 0.82 | 20.37   | 31.23   | 44.15   | 64.28   |
| 0.42 | 5683.94    | 9394.90     | 14237.43    | 23198.40    | 0.83 | 17.04   | 25.95   | 36.78   | 53.95   |
| 0.43 | 4903.44    | 8089.94     | 12317.72    | 19681.62    | 0.84 | 14.16   | 21.51   | 30.39   | 44.32   |
| 0.44 | 4256.16    | 7084.45     | 10802.83    | 17156.67    | 0.85 | 11.72   | 17.62   | 24.89   | 35.69   |
| 0.45 | 3699.10    | 6163.82     | 9254.38     | 14750.77    | 0.86 | 9.61    | 14.44   | 20.21   | 28.94   |
| 0.46 | 3225.73    | 5372.14     | 8091.77     | 12887.32    | 0.87 | 7.83    | 11.68   | 16.32   | 23.01   |
| 0.47 | 2823.22    | 4700.87     | 7066.53     | 10965.78    | 0.88 | 6.30    | 9.31    | 12.86   | 18.05   |
| 0.48 | 2460.74    | 4082.42     | 6090.68     | 9723.70     | 0.89 | 5.01    | 7.32    | 9.96    | 14.11   |
| 0.49 | 2146.08    | 3550.14     | 5320.79     | 8388.70     | 0.90 | 3.93    | 5.70    | 7.68    | 10.77   |
| 0.50 | 1868.33    | 3103.64     | 4670.38     | 7358.79     |      |         |         |         |         |

Table S415: Critical values for detector  $\hat{H}_{mov,sn}^{m,0.1}$  with windows size  $n = 0.1$ , and IM-OLS estimation in a model with intercept. The number of integrated regressors is 4 and the highest power of  $x_{kt}$  is 1.



| m    | 90 %       | 95 %       | 97,5 %     | 99 %       | m    | 90 %   | 95 %   | 97,5 %  | 99 %    |
|------|------------|------------|------------|------------|------|--------|--------|---------|---------|
| 0.10 | 2264110.15 | 3768738.69 | 5800951.97 | 9373854.59 | 0.51 | 523.34 | 886.60 | 1352.27 | 2150.48 |
| 0.11 | 1490364.70 | 2510311.97 | 3845688.24 | 6200032.14 | 0.52 | 462.19 | 773.33 | 1170.27 | 1883.03 |
| 0.12 | 1025574.44 | 1711920.52 | 2639054.44 | 4232124.55 | 0.53 | 399.80 | 665.24 | 1025.30 | 1630.50 |
| 0.13 | 715017.48  | 1208564.26 | 1855668.93 | 2930352.90 | 0.54 | 348.38 | 578.82 | 881.77  | 1410.06 |
| 0.14 | 509608.57  | 871168.63  | 1315012.94 | 2108253.33 | 0.55 | 305.23 | 506.06 | 756.96  | 1206.37 |
| 0.15 | 369244.96  | 637169.74  | 980592.73  | 1564848.68 | 0.56 | 264.63 | 442.18 | 662.77  | 1060.92 |
| 0.16 | 276516.45  | 466070.69  | 726838.83  | 1168792.08 | 0.57 | 230.36 | 386.37 | 579.49  | 908.62  |
| 0.17 | 206950.84  | 351202.27  | 545093.53  | 877498.38  | 0.58 | 199.05 | 328.55 | 497.11  | 787.73  |
| 0.18 | 159285.57  | 268165.48  | 412953.76  | 679766.92  | 0.59 | 174.58 | 285.80 | 432.13  | 675.38  |
| 0.19 | 122610.79  | 208685.25  | 320347.31  | 518013.98  | 0.60 | 153.17 | 248.92 | 375.41  | 587.28  |
| 0.20 | 96448.36   | 160770.10  | 245733.05  | 406927.57  | 0.61 | 132.75 | 218.52 | 325.42  | 507.00  |
| 0.21 | 76658.00   | 128706.79  | 197823.05  | 325013.74  | 0.62 | 116.59 | 190.39 | 282.35  | 447.05  |
| 0.22 | 60887.01   | 103464.43  | 159839.94  | 252954.11  | 0.63 | 101.15 | 165.33 | 247.39  | 388.57  |
| 0.23 | 49233.26   | 83004.77   | 126940.57  | 202420.30  | 0.64 | 87.70  | 143.59 | 215.23  | 333.64  |
| 0.24 | 39812.84   | 67407.66   | 103273.24  | 164578.84  | 0.65 | 76.13  | 124.02 | 185.08  | 286.91  |
| 0.25 | 32148.92   | 54340.89   | 84465.64   | 135977.36  | 0.66 | 65.32  | 107.10 | 159.98  | 248.61  |
| 0.26 | 26413.73   | 44693.10   | 69131.51   | 113802.74  | 0.67 | 56.54  | 92.19  | 137.63  | 211.36  |
| 0.27 | 21895.78   | 36786.91   | 56986.04   | 91472.74   | 0.68 | 48.94  | 79.40  | 117.67  | 186.67  |
| 0.28 | 18028.88   | 30749.75   | 47598.54   | 76249.12   | 0.69 | 42.42  | 68.97  | 101.25  | 161.01  |
| 0.29 | 15067.10   | 25834.08   | 39306.32   | 64073.13   | 0.70 | 36.69  | 59.66  | 88.72   | 137.85  |
| 0.30 | 12565.20   | 21241.73   | 32529.56   | 53089.85   | 0.71 | 31.71  | 51.07  | 74.94   | 115.78  |
| 0.31 | 10575.93   | 17819.04   | 27075.21   | 44917.54   | 0.72 | 26.93  | 43.35  | 64.49   | 99.53   |
| 0.32 | 8878.72    | 15006.08   | 22922.86   | 37460.10   | 0.73 | 23.13  | 36.69  | 54.60   | 85.58   |
| 0.33 | 7511.42    | 12687.52   | 19437.43   | 31868.08   | 0.74 | 19.77  | 31.66  | 46.36   | 71.37   |
| 0.34 | 6376.48    | 10832.56   | 16531.80   | 27093.21   | 0.75 | 16.86  | 26.93  | 39.36   | 60.52   |
| 0.35 | 5446.66    | 9118.49    | 14043.16   | 23220.54   | 0.76 | 14.34  | 22.72  | 33.24   | 51.05   |
| 0.36 | 4662.15    | 7792.71    | 11961.67   | 19146.97   | 0.77 | 12.28  | 19.03  | 27.70   | 42.22   |
| 0.37 | 3920.20    | 6622.01    | 10182.38   | 16369.51   | 0.78 | 10.20  | 16.05  | 23.16   | 34.74   |
| 0.38 | 3376.69    | 5645.15    | 8590.86    | 13939.13   | 0.79 | 8.54   | 13.41  | 19.28   | 28.60   |
| 0.39 | 2929.15    | 4872.30    | 7396.75    | 12056.26   | 0.80 | 7.12   | 11.12  | 15.93   | 23.12   |
| 0.40 | 2510.55    | 4219.88    | 6425.10    | 10286.18   | 0.81 | 5.87   | 9.16   | 13.16   | 19.42   |
| 0.41 | 2163.33    | 3617.15    | 5591.77    | 9180.68    | 0.82 | 4.85   | 7.51   | 10.67   | 15.79   |
| 0.42 | 1878.95    | 3140.87    | 4831.63    | 7890.33    | 0.83 | 3.96   | 6.13   | 8.73    | 12.84   |
| 0.43 | 1613.82    | 2710.16    | 4176.29    | 6725.66    | 0.84 | 3.22   | 5.01   | 7.14    | 10.49   |
| 0.44 | 1401.62    | 2360.00    | 3620.08    | 5850.33    | 0.85 | 2.60   | 4.02   | 5.76    | 8.43    |
| 0.45 | 1215.18    | 2036.50    | 3097.58    | 5041.54    | 0.86 | 2.11   | 3.24   | 4.60    | 6.69    |
| 0.46 | 1047.96    | 1764.76    | 2690.49    | 4415.47    | 0.87 | 1.68   | 2.56   | 3.61    | 5.26    |
| 0.47 | 909.99     | 1526.00    | 2344.42    | 3823.59    | 0.88 | 1.34   | 2.02   | 2.81    | 4.08    |
| 0.48 | 789.14     | 1335.90    | 2059.83    | 3294.52    | 0.89 | 1.06   | 1.55   | 2.17    | 3.12    |
| 0.49 | 688.29     | 1170.11    | 1786.30    | 2852.72    | 0.90 | 0.86   | 1.22   | 1.68    | 2.41    |
| 0.50 | 601.93     | 1011.98    | 1547.16    | 2456.94    |      |        |        |         |         |

Table S416: Critical values for detector  $\hat{H}_{mov,sn}^{m,0.2}$  with windows size  $n = 0.2$ , and FM-OLS and D-OLS estimation in a model with intercept. The number of integrated regressors is 4 and the highest power of  $x_{kt}$  is 1.

| m    | 90 %        | 95 %        | 97,5 %      | 99 %        | m    | 90 %    | 95 %    | 97,5 %  | 99 %    |
|------|-------------|-------------|-------------|-------------|------|---------|---------|---------|---------|
| 0.10 | 10757670.07 | 17904403.45 | 27558085.07 | 44293282.11 | 0.51 | 2442.93 | 4016.85 | 6070.91 | 9567.38 |
| 0.11 | 7063000.04  | 11846445.03 | 18113682.76 | 29562583.51 | 0.52 | 2115.90 | 3511.98 | 5270.07 | 8293.83 |
| 0.12 | 4849908.92  | 8088776.42  | 12272312.37 | 19801158.70 | 0.53 | 1865.17 | 3055.75 | 4584.22 | 7295.12 |
| 0.13 | 3367721.48  | 5565016.79  | 8522794.13  | 13873714.51 | 0.54 | 1636.59 | 2682.12 | 4040.71 | 6383.52 |
| 0.14 | 2407969.55  | 3993450.48  | 6165465.41  | 10048791.67 | 0.55 | 1420.53 | 2328.35 | 3482.29 | 5514.05 |
| 0.15 | 1744611.96  | 2917395.39  | 4519993.29  | 7316380.63  | 0.56 | 1237.39 | 2026.20 | 3054.66 | 4739.17 |
| 0.16 | 1292241.33  | 2175612.02  | 3342399.52  | 5477873.64  | 0.57 | 1079.33 | 1762.62 | 2638.33 | 4103.65 |
| 0.17 | 979937.83   | 1638277.85  | 2501616.46  | 4149694.39  | 0.58 | 937.75  | 1519.64 | 2285.05 | 3517.38 |
| 0.18 | 747341.72   | 1255666.65  | 1926062.60  | 3106199.36  | 0.59 | 816.11  | 1321.62 | 1985.63 | 3060.76 |
| 0.19 | 581402.59   | 966501.36   | 1479183.79  | 2371637.97  | 0.60 | 715.29  | 1152.31 | 1716.12 | 2652.68 |
| 0.20 | 456922.65   | 764916.42   | 1159878.86  | 1860672.65  | 0.61 | 617.46  | 1001.05 | 1487.01 | 2285.03 |
| 0.21 | 360324.25   | 606229.29   | 922232.63   | 1472004.50  | 0.62 | 541.67  | 875.51  | 1290.35 | 1977.09 |
| 0.22 | 284996.18   | 480525.41   | 732456.30   | 1162654.12  | 0.63 | 471.89  | 766.25  | 1114.09 | 1718.93 |
| 0.23 | 230165.10   | 384564.87   | 589823.31   | 943832.59   | 0.64 | 410.27  | 661.63  | 978.46  | 1476.67 |
| 0.24 | 185974.21   | 312650.26   | 479605.12   | 770258.25   | 0.65 | 355.29  | 571.83  | 847.23  | 1285.56 |
| 0.25 | 152275.60   | 257560.13   | 391228.53   | 624660.12   | 0.66 | 308.28  | 493.89  | 727.93  | 1107.42 |
| 0.26 | 125116.86   | 209504.78   | 322716.30   | 514654.40   | 0.67 | 266.93  | 425.67  | 629.51  | 962.03  |
| 0.27 | 103177.36   | 172497.41   | 262220.82   | 418392.33   | 0.68 | 229.97  | 367.28  | 534.44  | 828.84  |
| 0.28 | 85817.21    | 141732.53   | 216054.30   | 347226.64   | 0.69 | 197.84  | 314.69  | 456.82  | 712.86  |
| 0.29 | 70949.99    | 118511.57   | 181366.01   | 288844.81   | 0.70 | 169.63  | 268.62  | 395.71  | 606.39  |
| 0.30 | 58982.37    | 98668.71    | 152013.05   | 241256.23   | 0.71 | 145.63  | 232.02  | 339.74  | 518.72  |
| 0.31 | 49197.57    | 83702.58    | 127844.71   | 205169.22   | 0.72 | 125.59  | 198.49  | 287.78  | 445.69  |
| 0.32 | 41840.96    | 69696.96    | 108142.42   | 172281.84   | 0.73 | 106.93  | 168.89  | 245.13  | 372.88  |
| 0.33 | 35291.42    | 58797.95    | 91466.84    | 145315.87   | 0.74 | 91.78   | 144.24  | 208.08  | 316.43  |
| 0.34 | 29801.89    | 49932.50    | 76617.26    | 123752.53   | 0.75 | 78.46   | 121.95  | 176.68  | 267.64  |
| 0.35 | 25121.48    | 42668.79    | 64861.21    | 104280.68   | 0.76 | 66.48   | 103.07  | 149.13  | 225.09  |
| 0.36 | 21467.68    | 36042.09    | 55057.68    | 89108.91    | 0.77 | 56.16   | 87.10   | 126.10  | 188.01  |
| 0.37 | 18300.95    | 30496.88    | 47147.76    | 74526.02    | 0.78 | 47.48   | 73.10   | 104.71  | 155.67  |
| 0.38 | 15766.20    | 26278.76    | 40023.78    | 63535.11    | 0.79 | 39.83   | 61.21   | 86.85   | 129.52  |
| 0.39 | 13557.71    | 22411.50    | 34046.44    | 54128.03    | 0.80 | 33.36   | 50.69   | 71.91   | 105.55  |
| 0.40 | 11614.10    | 19341.89    | 29229.97    | 47055.75    | 0.81 | 27.72   | 42.23   | 59.18   | 86.30   |
| 0.41 | 10063.70    | 16735.02    | 25485.56    | 41335.31    | 0.82 | 22.94   | 34.71   | 48.84   | 70.84   |
| 0.42 | 8752.98     | 14531.64    | 22049.54    | 35729.10    | 0.83 | 18.96   | 28.46   | 40.12   | 58.31   |
| 0.43 | 7531.68     | 12450.74    | 18987.62    | 30393.81    | 0.84 | 15.46   | 23.25   | 32.65   | 47.31   |
| 0.44 | 6522.60     | 10901.61    | 16552.51    | 26299.37    | 0.85 | 12.60   | 18.79   | 26.43   | 37.54   |
| 0.45 | 5642.48     | 9452.49     | 14076.65    | 22703.23    | 0.86 | 10.20   | 15.20   | 21.18   | 30.13   |
| 0.46 | 4903.54     | 8180.98     | 12343.82    | 19496.57    | 0.87 | 8.19    | 12.14   | 16.87   | 23.72   |
| 0.47 | 4289.74     | 7107.61     | 10740.20    | 16732.56    | 0.88 | 6.55    | 9.59    | 13.19   | 18.51   |
| 0.48 | 3712.13     | 6163.87     | 9220.96     | 14740.13    | 0.89 | 5.17    | 7.50    | 10.13   | 14.36   |
| 0.49 | 3221.29     | 5369.86     | 7968.20     | 12652.94    | 0.90 | 4.04    | 5.81    | 7.79    | 10.91   |
| 0.50 | 2789.75     | 4647.91     | 6977.26     | 10963.22    |      |         |         |         |         |

Table S417: Critical values for detector  $\hat{H}_{mov,sn}^{m,0.2}$  with windows size  $n = 0.2$ , and IM-OLS estimation in a model with intercept. The number of integrated regressors is 4 and the highest power of  $x_{kt}$  is 1.

| m    | 90 %       | 95 %       | 97,5 %     | 99 %        | m    | 90 %   | 95 %   | 97,5 %  | 99 %    |
|------|------------|------------|------------|-------------|------|--------|--------|---------|---------|
| 0.10 | 2759241.76 | 4627193.85 | 7184700.70 | 11607249.60 | 0.51 | 593.39 | 997.38 | 1521.83 | 2415.40 |
| 0.11 | 1822494.70 | 3093879.24 | 4740720.33 | 7613195.86  | 0.52 | 520.58 | 873.28 | 1316.71 | 2104.74 |
| 0.12 | 1254652.39 | 2104498.94 | 3253210.46 | 5214860.00  | 0.53 | 447.65 | 748.75 | 1142.72 | 1810.38 |
| 0.13 | 875799.37  | 1484809.86 | 2280818.25 | 3621956.07  | 0.54 | 388.21 | 644.97 | 987.65  | 1567.55 |
| 0.14 | 623172.83  | 1070348.32 | 1621568.08 | 2595631.78  | 0.55 | 340.13 | 564.92 | 842.84  | 1338.43 |
| 0.15 | 452064.79  | 782426.85  | 1212109.37 | 1931935.71  | 0.56 | 292.90 | 488.99 | 731.87  | 1162.79 |
| 0.16 | 337023.09  | 576824.78  | 896689.07  | 1438137.65  | 0.57 | 253.70 | 424.72 | 637.83  | 993.51  |
| 0.17 | 253595.90  | 430287.99  | 676056.70  | 1080205.39  | 0.58 | 218.15 | 359.11 | 541.95  | 849.50  |
| 0.18 | 194784.63  | 329293.75  | 509598.28  | 838563.66   | 0.59 | 190.59 | 311.86 | 468.80  | 735.89  |
| 0.19 | 149050.53  | 254201.20  | 392562.46  | 636622.77   | 0.60 | 166.00 | 269.37 | 406.14  | 632.02  |
| 0.20 | 117552.62  | 196368.16  | 302220.87  | 497737.90   | 0.61 | 143.87 | 235.61 | 350.47  | 543.61  |
| 0.21 | 93052.72   | 157098.74  | 242412.69  | 398611.49   | 0.62 | 125.58 | 204.34 | 302.35  | 475.88  |
| 0.22 | 73960.34   | 126272.16  | 195460.62  | 310217.17   | 0.63 | 108.26 | 176.43 | 263.15  | 412.46  |
| 0.23 | 59628.62   | 101286.45  | 154756.58  | 248857.35   | 0.64 | 93.74  | 152.40 | 227.37  | 354.04  |
| 0.24 | 48140.37   | 81874.56   | 125685.33  | 200507.90   | 0.65 | 80.59  | 130.84 | 194.75  | 301.40  |
| 0.25 | 38863.33   | 65924.95   | 103006.61  | 166618.45   | 0.66 | 68.94  | 112.36 | 166.92  | 259.94  |
| 0.26 | 31908.93   | 54218.22   | 83833.91   | 139069.74   | 0.67 | 59.38  | 96.47  | 143.22  | 219.16  |
| 0.27 | 26414.11   | 44350.48   | 68838.30   | 111123.47   | 0.68 | 51.09  | 82.60  | 122.13  | 192.97  |
| 0.28 | 21737.68   | 37209.90   | 57786.53   | 92650.10    | 0.69 | 44.07  | 71.27  | 104.42  | 165.15  |
| 0.29 | 18084.57   | 31179.64   | 47321.59   | 77328.10    | 0.70 | 37.88  | 61.39  | 90.93   | 141.09  |
| 0.30 | 15076.65   | 25572.25   | 39321.17   | 64315.77    | 0.71 | 32.57  | 52.21  | 76.63   | 118.17  |
| 0.31 | 12668.78   | 21406.72   | 32552.26   | 53894.61    | 0.72 | 27.53  | 44.19  | 65.68   | 101.33  |
| 0.32 | 10612.31   | 17971.84   | 27575.57   | 44893.93    | 0.73 | 23.56  | 37.26  | 55.30   | 86.61   |
| 0.33 | 8960.55    | 15180.57   | 23296.54   | 37870.10    | 0.74 | 20.07  | 32.08  | 46.87   | 72.02   |
| 0.34 | 7612.24    | 12950.67   | 19673.45   | 32270.98    | 0.75 | 17.06  | 27.17  | 39.70   | 60.96   |
| 0.35 | 6437.01    | 10836.83   | 16651.86   | 27437.35    | 0.76 | 14.49  | 22.88  | 33.42   | 51.31   |
| 0.36 | 5501.78    | 9202.73    | 14223.71   | 22654.47    | 0.77 | 12.38  | 19.16  | 27.87   | 42.33   |
| 0.37 | 4633.02    | 7848.86    | 12045.85   | 19370.28    | 0.78 | 10.28  | 16.14  | 23.23   | 34.84   |
| 0.38 | 3969.64    | 6655.23    | 10090.27   | 16414.27    | 0.79 | 8.63   | 13.51  | 19.36   | 28.70   |
| 0.39 | 3439.38    | 5756.67    | 8726.52    | 14175.21    | 0.80 | 7.22   | 11.22  | 16.03   | 23.22   |
| 0.40 | 2945.66    | 4937.04    | 7548.71    | 12040.52    | 0.81 | 5.98   | 9.26   | 13.27   | 19.54   |
| 0.41 | 2525.18    | 4241.95    | 6550.78    | 10725.03    | 0.82 | 4.97   | 7.62   | 10.76   | 15.92   |
| 0.42 | 2189.53    | 3679.42    | 5611.75    | 9216.94     | 0.83 | 4.08   | 6.24   | 8.83    | 12.95   |
| 0.43 | 1874.36    | 3157.52    | 4843.75    | 7812.90     | 0.84 | 3.34   | 5.13   | 7.25    | 10.62   |
| 0.44 | 1623.23    | 2742.99    | 4195.92    | 6718.69     | 0.85 | 2.72   | 4.14   | 5.87    | 8.54    |
| 0.45 | 1405.91    | 2344.22    | 3585.31    | 5819.17     | 0.86 | 2.23   | 3.36   | 4.73    | 6.81    |
| 0.46 | 1206.73    | 2036.16    | 3098.70    | 5074.92     | 0.87 | 1.81   | 2.69   | 3.74    | 5.37    |
| 0.47 | 1044.17    | 1745.42    | 2668.08    | 4363.88     | 0.88 | 1.47   | 2.13   | 2.94    | 4.19    |
| 0.48 | 902.95     | 1522.11    | 2345.47    | 3751.65     | 0.89 | 1.19   | 1.68   | 2.29    | 3.23    |
| 0.49 | 782.80     | 1334.92    | 2027.02    | 3241.74     | 0.90 | 1.01   | 1.34   | 1.81    | 2.53    |
| 0.50 | 684.97     | 1147.80    | 1752.90    | 2775.78     |      |        |        |         |         |

Table S418: Critical values for detector  $\hat{H}_{mov,sn}^{m,0.3}$  with windows size  $n = 0.3$ , and FM-OLS and D-OLS estimation in a model with intercept. The number of integrated regressors is 4 and the highest power of  $x_{kt}$  is 1.

| m    | 90 %        | 95 %        | 97,5 %      | 99 %        | m    | 90 %    | 95 %    | 97,5 %  | 99 %     |
|------|-------------|-------------|-------------|-------------|------|---------|---------|---------|----------|
| 0.10 | 13144812.85 | 22046047.89 | 34018202.80 | 54945437.65 | 0.51 | 2762.15 | 4545.76 | 6836.62 | 10787.22 |
| 0.11 | 8651877.80  | 14604570.29 | 22395449.31 | 36699904.69 | 0.52 | 2387.52 | 3960.96 | 5935.65 | 9297.41  |
| 0.12 | 5919196.48  | 9979814.96  | 15162311.36 | 24673730.16 | 0.53 | 2094.92 | 3427.17 | 5143.60 | 8154.42  |
| 0.13 | 4127380.49  | 6866191.58  | 10511967.90 | 17261305.64 | 0.54 | 1827.02 | 2983.50 | 4465.01 | 7066.51  |
| 0.14 | 2940642.40  | 4914645.80  | 7602540.72  | 12395386.50 | 0.55 | 1584.30 | 2593.83 | 3870.02 | 6100.23  |
| 0.15 | 2133243.36  | 3597171.45  | 5558624.69  | 9067056.71  | 0.56 | 1370.72 | 2240.37 | 3383.07 | 5195.99  |
| 0.16 | 1577428.11  | 2675836.51  | 4113275.93  | 6797975.44  | 0.57 | 1190.04 | 1941.41 | 2892.75 | 4464.96  |
| 0.17 | 1192235.36  | 2009370.35  | 3076733.72  | 5128486.99  | 0.58 | 1029.38 | 1670.71 | 2495.98 | 3839.92  |
| 0.18 | 910737.75   | 1539298.24  | 2367549.77  | 3830098.25  | 0.59 | 893.98  | 1441.01 | 2162.81 | 3327.02  |
| 0.19 | 707787.81   | 1185661.28  | 1829102.38  | 2926806.40  | 0.60 | 779.42  | 1250.65 | 1855.73 | 2875.41  |
| 0.20 | 556188.72   | 934219.10   | 1424240.94  | 2282939.53  | 0.61 | 670.20  | 1081.89 | 1597.99 | 2462.45  |
| 0.21 | 438571.96   | 740586.68   | 1130842.18  | 1812862.57  | 0.62 | 582.96  | 940.03  | 1382.36 | 2115.44  |
| 0.22 | 346364.83   | 584226.88   | 894669.56   | 1424731.57  | 0.63 | 507.22  | 820.04  | 1185.52 | 1813.10  |
| 0.23 | 278813.18   | 468611.13   | 719249.14   | 1156128.97  | 0.64 | 438.29  | 704.49  | 1033.22 | 1565.16  |
| 0.24 | 225477.25   | 379954.40   | 584917.13   | 942921.03   | 0.65 | 377.92  | 605.51  | 893.47  | 1349.26  |
| 0.25 | 184507.20   | 312267.81   | 476699.27   | 764642.51   | 0.66 | 326.17  | 519.74  | 763.54  | 1151.51  |
| 0.26 | 151082.09   | 253504.70   | 393098.84   | 624479.46   | 0.67 | 280.50  | 444.16  | 655.60  | 999.75   |
| 0.27 | 124394.74   | 208799.86   | 319181.85   | 508055.29   | 0.68 | 240.80  | 383.16  | 555.34  | 859.17   |
| 0.28 | 103144.86   | 170863.05   | 261850.70   | 422011.51   | 0.69 | 205.84  | 326.01  | 472.86  | 731.44   |
| 0.29 | 85279.31    | 142560.21   | 218184.99   | 349237.98   | 0.70 | 175.55  | 277.89  | 406.04  | 623.23   |
| 0.30 | 70627.93    | 119068.30   | 183223.41   | 292250.50   | 0.71 | 150.10  | 238.22  | 347.25  | 529.94   |
| 0.31 | 58838.71    | 100483.64   | 153649.41   | 247176.91   | 0.72 | 128.61  | 202.77  | 293.46  | 453.15   |
| 0.32 | 49981.25    | 83586.32    | 129934.56   | 206295.00   | 0.73 | 109.17  | 172.11  | 248.87  | 377.63   |
| 0.33 | 42126.15    | 70188.14    | 109276.99   | 175346.01   | 0.74 | 93.21   | 146.03  | 210.77  | 319.48   |
| 0.34 | 35316.89    | 59558.24    | 91692.28    | 147888.23   | 0.75 | 79.50   | 123.33  | 178.18  | 270.16   |
| 0.35 | 29756.44    | 50581.08    | 77477.65    | 124675.20   | 0.76 | 67.19   | 103.84  | 150.14  | 225.99   |
| 0.36 | 25293.87    | 42846.35    | 64964.23    | 105127.39   | 0.77 | 56.56   | 87.58   | 126.69  | 188.77   |
| 0.37 | 21571.61    | 36059.65    | 55672.83    | 88317.64    | 0.78 | 47.74   | 73.45   | 105.13  | 155.94   |
| 0.38 | 18553.89    | 30974.25    | 47223.21    | 74871.16    | 0.79 | 40.02   | 61.36   | 87.04   | 129.69   |
| 0.39 | 15919.74    | 26352.47    | 40051.14    | 63618.44    | 0.80 | 33.48   | 50.80   | 72.02   | 105.70   |
| 0.40 | 13639.81    | 22765.99    | 34385.93    | 55543.19    | 0.81 | 27.82   | 42.35   | 59.27   | 86.47    |
| 0.41 | 11793.37    | 19545.27    | 29865.95    | 48244.58    | 0.82 | 23.04   | 34.81   | 48.95   | 70.93    |
| 0.42 | 10225.64    | 16952.56    | 25717.07    | 41433.79    | 0.83 | 19.07   | 28.60   | 40.23   | 58.47    |
| 0.43 | 8753.72     | 14490.71    | 22035.98    | 35134.79    | 0.84 | 15.58   | 23.37   | 32.74   | 47.44    |
| 0.44 | 7557.76     | 12619.76    | 19097.74    | 30584.62    | 0.85 | 12.72   | 18.90   | 26.54   | 37.65    |
| 0.45 | 6523.94     | 10919.95    | 16276.23    | 26043.86    | 0.86 | 10.31   | 15.31   | 21.28   | 30.24    |
| 0.46 | 5650.76     | 9422.31     | 14204.86    | 22288.67    | 0.87 | 8.31    | 12.27   | 16.98   | 23.81    |
| 0.47 | 4913.16     | 8136.89     | 12366.87    | 19193.54    | 0.88 | 6.66    | 9.70    | 13.31   | 18.64    |
| 0.48 | 4244.05     | 7053.76     | 10547.42    | 16793.41    | 0.89 | 5.29    | 7.61    | 10.24   | 14.44    |
| 0.49 | 3659.51     | 6118.01     | 9137.79     | 14365.96    | 0.90 | 4.16    | 5.92    | 7.91    | 11.02    |
| 0.50 | 3168.11     | 5266.48     | 7912.12     | 12349.09    |      |         |         |         |          |

Table S419: Critical values for detector  $\hat{H}_{mov,sn}^{m,0.3}$  with windows size  $n = 0.3$ , and IM-OLS estimation in a model with intercept. The number of integrated regressors is 4 and the highest power of  $x_{kt}$  is 1.

| m    | 90 %        | 95 %        | 97,5 %      | 99 %         | m    | 90 %    | 95 %    | 97,5 %  | 99 %    |
|------|-------------|-------------|-------------|--------------|------|---------|---------|---------|---------|
| 0.10 | 28184792.60 | 45025682.35 | 66306528.56 | 102846366.28 | 0.51 | 1189.03 | 1934.73 | 2892.14 | 4447.81 |
| 0.11 | 16570545.64 | 26544137.16 | 39512629.34 | 60753676.00  | 0.52 | 1029.05 | 1667.97 | 2473.92 | 3805.55 |
| 0.12 | 10050014.31 | 16082561.75 | 23967660.77 | 36925312.60  | 0.53 | 879.35  | 1421.59 | 2110.63 | 3263.48 |
| 0.13 | 6373789.49  | 10204225.50 | 15063239.38 | 23361524.70  | 0.54 | 764.96  | 1228.76 | 1807.27 | 2801.00 |
| 0.14 | 4238345.77  | 6751204.53  | 9938286.95  | 15295723.80  | 0.55 | 649.21  | 1049.40 | 1555.98 | 2437.67 |
| 0.15 | 2865548.10  | 4599068.05  | 6835867.86  | 10449418.76  | 0.56 | 558.50  | 913.76  | 1350.27 | 2094.56 |
| 0.16 | 1974091.84  | 3172199.84  | 4627202.58  | 7311706.20   | 0.57 | 483.36  | 781.96  | 1157.65 | 1773.67 |
| 0.17 | 1397335.80  | 2224239.97  | 3275135.65  | 5099301.14   | 0.58 | 414.03  | 668.03  | 988.23  | 1507.99 |
| 0.18 | 1005928.47  | 1603996.43  | 2354285.60  | 3718296.43   | 0.59 | 356.29  | 572.94  | 860.91  | 1317.59 |
| 0.19 | 726974.42   | 1184134.14  | 1749478.09  | 2658546.23   | 0.60 | 308.44  | 496.70  | 738.00  | 1119.20 |
| 0.20 | 541106.59   | 868829.82   | 1314717.93  | 1981826.04   | 0.61 | 266.04  | 426.04  | 624.99  | 969.63  |
| 0.21 | 403004.07   | 654860.93   | 973481.43   | 1528282.68   | 0.62 | 229.74  | 366.01  | 541.83  | 840.53  |
| 0.22 | 303511.28   | 494939.17   | 742950.22   | 1159052.79   | 0.63 | 197.97  | 315.87  | 464.42  | 714.48  |
| 0.23 | 235098.53   | 380364.63   | 569995.42   | 881099.00    | 0.64 | 169.05  | 270.09  | 400.42  | 615.35  |
| 0.24 | 181818.75   | 293516.63   | 435488.14   | 680132.71    | 0.65 | 145.89  | 231.66  | 345.24  | 527.69  |
| 0.25 | 142468.04   | 230144.53   | 342223.27   | 525147.05    | 0.66 | 124.61  | 199.82  | 296.89  | 455.78  |
| 0.26 | 111407.76   | 179577.06   | 265804.74   | 403181.40    | 0.67 | 107.02  | 170.84  | 251.50  | 388.12  |
| 0.27 | 87999.48    | 141862.42   | 211772.71   | 325136.26    | 0.68 | 91.32   | 147.68  | 215.87  | 332.01  |
| 0.28 | 70570.31    | 113827.70   | 170149.65   | 263485.94    | 0.69 | 78.50   | 125.89  | 186.06  | 281.88  |
| 0.29 | 56486.12    | 91733.38    | 136147.41   | 213487.68    | 0.70 | 67.58   | 107.34  | 157.56  | 242.11  |
| 0.30 | 45923.92    | 73877.74    | 109989.94   | 169282.55    | 0.71 | 57.53   | 90.90   | 133.46  | 201.64  |
| 0.31 | 37476.95    | 60196.46    | 88882.31    | 139314.25    | 0.72 | 49.08   | 77.49   | 114.43  | 170.94  |
| 0.32 | 30649.08    | 49508.07    | 74021.22    | 112885.80    | 0.73 | 41.80   | 66.05   | 96.91   | 146.12  |
| 0.33 | 25155.46    | 40600.63    | 60668.53    | 94686.62     | 0.74 | 35.59   | 56.24   | 81.44   | 123.51  |
| 0.34 | 20663.21    | 33615.37    | 49664.99    | 78470.91     | 0.75 | 29.98   | 47.59   | 67.97   | 103.15  |
| 0.35 | 17028.74    | 27667.55    | 41107.35    | 63938.12     | 0.76 | 25.44   | 39.88   | 57.57   | 86.22   |
| 0.36 | 14079.78    | 23087.54    | 33830.45    | 52248.52     | 0.77 | 21.34   | 33.22   | 47.84   | 71.67   |
| 0.37 | 11792.35    | 19139.19    | 28559.81    | 43610.92     | 0.78 | 17.78   | 27.61   | 39.37   | 59.08   |
| 0.38 | 9881.50     | 16049.06    | 23561.68    | 36385.78     | 0.79 | 14.96   | 23.31   | 33.20   | 49.26   |
| 0.39 | 8279.11     | 13521.10    | 19657.89    | 30154.39     | 0.80 | 12.31   | 19.12   | 27.32   | 39.53   |
| 0.40 | 7013.05     | 11329.44    | 16764.17    | 25753.22     | 0.81 | 10.19   | 15.76   | 22.68   | 33.38   |
| 0.41 | 5921.75     | 9635.88     | 14216.92    | 21776.79     | 0.82 | 8.44    | 12.97   | 18.60   | 27.14   |
| 0.42 | 4995.35     | 8120.44     | 12081.37    | 18470.60     | 0.83 | 6.91    | 10.52   | 15.08   | 21.91   |
| 0.43 | 4227.31     | 6852.12     | 10164.65    | 15962.44     | 0.84 | 5.59    | 8.62    | 12.12   | 17.47   |
| 0.44 | 3572.19     | 5787.04     | 8664.38     | 13469.35     | 0.85 | 4.46    | 6.82    | 9.72    | 13.98   |
| 0.45 | 3055.10     | 4979.73     | 7419.86     | 11560.99     | 0.86 | 3.56    | 5.43    | 7.61    | 11.07   |
| 0.46 | 2613.05     | 4195.67     | 6281.06     | 9879.88      | 0.87 | 2.79    | 4.24    | 6.00    | 8.52    |
| 0.47 | 2224.79     | 3591.27     | 5329.31     | 8468.99      | 0.88 | 2.15    | 3.26    | 4.54    | 6.59    |
| 0.48 | 1906.03     | 3081.60     | 4553.26     | 7171.01      | 0.89 | 1.64    | 2.46    | 3.39    | 4.90    |
| 0.49 | 1635.91     | 2652.18     | 3907.58     | 6088.10      | 0.90 | 1.23    | 1.84    | 2.53    | 3.62    |
| 0.50 | 1401.22     | 2248.89     | 3326.59     | 5189.42      |      |         |         |         |         |

Table S420: Critical values for detector  $\hat{H}_{mov,sn}^{m,0.1}$  with windows size  $n = 0.1$ , and FM-OLS and D-OLS estimation in a model with intercept and linear trend. The number of integrated regressors is 4 and the highest power of  $x_{kt}$  is 1.

| m    | 90 %         | 95 %         | 97,5 %       | 99 %         | m    | 90 %    | 95 %    | 97,5 %   | 99 %     |
|------|--------------|--------------|--------------|--------------|------|---------|---------|----------|----------|
| 0.10 | 111634676.30 | 179329158.94 | 262369848.89 | 409771617.17 | 0.51 | 4683.48 | 7527.59 | 11263.23 | 17660.13 |
| 0.11 | 65388242.87  | 104112534.73 | 153597954.24 | 239308651.88 | 0.52 | 4020.85 | 6457.76 | 9657.08  | 15068.53 |
| 0.12 | 40254627.69  | 64081212.66  | 92922038.79  | 144173784.23 | 0.53 | 3446.03 | 5547.22 | 8307.09  | 12799.65 |
| 0.13 | 25363668.77  | 40804196.55  | 59878934.97  | 91643364.17  | 0.54 | 2948.59 | 4818.61 | 7110.38  | 10990.03 |
| 0.14 | 16810473.21  | 26688984.40  | 39366863.50  | 59795956.01  | 0.55 | 2542.49 | 4121.20 | 6107.13  | 9523.39  |
| 0.15 | 11234091.43  | 18022233.70  | 26475769.31  | 40014145.28  | 0.56 | 2202.60 | 3534.48 | 5262.71  | 8196.78  |
| 0.16 | 7794260.03   | 12392661.05  | 18417724.19  | 28301131.82  | 0.57 | 1908.47 | 3052.27 | 4571.95  | 6963.95  |
| 0.17 | 5492902.67   | 8763868.82   | 12937380.52  | 20097633.31  | 0.58 | 1639.09 | 2608.63 | 3814.50  | 5933.17  |
| 0.18 | 3898050.90   | 6239694.37   | 9277301.84   | 14479794.94  | 0.59 | 1405.67 | 2229.52 | 3270.51  | 5064.96  |
| 0.19 | 2856494.91   | 4572989.60   | 6779884.03   | 10551273.05  | 0.60 | 1211.31 | 1935.51 | 2796.45  | 4248.34  |
| 0.20 | 2111231.31   | 3366777.32   | 4986251.86   | 7813598.87   | 0.61 | 1039.68 | 1664.77 | 2391.42  | 3640.09  |
| 0.21 | 1583077.75   | 2566456.03   | 3787514.76   | 5836742.88   | 0.62 | 892.98  | 1432.08 | 2078.74  | 3084.93  |
| 0.22 | 1193505.56   | 1948578.48   | 2895159.07   | 4449174.90   | 0.63 | 772.24  | 1223.79 | 1774.94  | 2664.38  |
| 0.23 | 919020.07    | 1497536.24   | 2224994.65   | 3406003.71   | 0.64 | 663.51  | 1047.30 | 1520.51  | 2280.25  |
| 0.24 | 717508.27    | 1163546.46   | 1720136.23   | 2657789.12   | 0.65 | 565.81  | 899.92  | 1311.59  | 1960.14  |
| 0.25 | 565303.83    | 897496.03    | 1348701.75   | 2089274.61   | 0.66 | 484.89  | 775.12  | 1118.77  | 1687.47  |
| 0.26 | 439962.73    | 704141.32    | 1055741.14   | 1615006.45   | 0.67 | 418.21  | 659.72  | 961.43   | 1443.04  |
| 0.27 | 348720.12    | 557826.97    | 834214.65    | 1313824.96   | 0.68 | 356.91  | 562.63  | 824.78   | 1266.39  |
| 0.28 | 278672.98    | 445926.37    | 659921.78    | 1036829.65   | 0.69 | 304.69  | 483.38  | 708.97   | 1053.72  |
| 0.29 | 224715.55    | 363414.73    | 532385.34    | 817367.90    | 0.70 | 261.48  | 412.64  | 600.97   | 898.72   |
| 0.30 | 182282.81    | 291305.94    | 436133.19    | 671732.02    | 0.71 | 222.32  | 352.02  | 510.68   | 759.59   |
| 0.31 | 146701.42    | 237849.03    | 355956.56    | 547248.61    | 0.72 | 189.24  | 297.72  | 437.66   | 640.86   |
| 0.32 | 120167.11    | 196048.91    | 288283.10    | 444329.71    | 0.73 | 161.97  | 254.41  | 367.62   | 545.70   |
| 0.33 | 98309.29     | 160239.65    | 237556.97    | 365362.41    | 0.74 | 137.68  | 215.40  | 310.53   | 462.14   |
| 0.34 | 81617.81     | 131048.71    | 195048.81    | 302154.54    | 0.75 | 116.17  | 182.08  | 263.89   | 390.92   |
| 0.35 | 66924.01     | 108625.41    | 161753.32    | 253373.46    | 0.76 | 98.47   | 153.62  | 220.87   | 329.86   |
| 0.36 | 55711.80     | 90234.35     | 135053.30    | 207824.01    | 0.77 | 82.82   | 128.32  | 185.60   | 274.85   |
| 0.37 | 46450.45     | 75010.94     | 112248.62    | 174038.14    | 0.78 | 69.50   | 106.80  | 153.29   | 225.82   |
| 0.38 | 38978.11     | 63070.24     | 93465.28     | 144786.95    | 0.79 | 58.01   | 89.61   | 127.89   | 188.04   |
| 0.39 | 32814.07     | 53103.86     | 78915.91     | 119791.81    | 0.80 | 48.41   | 73.98   | 104.10   | 154.00   |
| 0.40 | 27636.68     | 44563.10     | 66656.91     | 101329.36    | 0.81 | 40.07   | 61.10   | 86.39    | 126.72   |
| 0.41 | 23454.20     | 37953.15     | 56639.83     | 86763.38     | 0.82 | 33.06   | 50.27   | 70.86    | 102.37   |
| 0.42 | 19837.97     | 31956.31     | 48021.66     | 73994.51     | 0.83 | 27.23   | 41.11   | 57.87    | 82.99    |
| 0.43 | 16768.94     | 27050.58     | 40520.98     | 62989.98     | 0.84 | 22.25   | 33.47   | 46.52    | 67.50    |
| 0.44 | 14221.90     | 22907.92     | 34254.05     | 53798.69     | 0.85 | 17.94   | 26.95   | 37.44    | 54.19    |
| 0.45 | 12072.25     | 19615.69     | 29072.44     | 45754.93     | 0.86 | 14.38   | 21.48   | 29.76    | 42.70    |
| 0.46 | 10253.61     | 16755.86     | 24769.90     | 38484.15     | 0.87 | 11.44   | 16.97   | 23.42    | 33.32    |
| 0.47 | 8790.22      | 14335.91     | 21054.13     | 33134.34     | 0.88 | 8.99    | 13.26   | 18.13    | 25.57    |
| 0.48 | 7479.27      | 12218.48     | 18192.88     | 28219.69     | 0.89 | 6.99    | 10.25   | 13.79    | 19.40    |
| 0.49 | 6416.36      | 10388.55     | 15577.30     | 24421.18     | 0.90 | 5.33    | 7.75    | 10.52    | 14.57    |
| 0.50 | 5469.27      | 8827.25      | 13336.96     | 20678.38     |      |         |         |          |          |

Table S421: Critical values for detector  $\hat{H}_{mov,sn}^{m,0.1}$  with windows size  $n = 0.1$ , and IM-OLS estimation in a model with intercept and linear trend. The number of integrated regressors is 4 and the highest power of  $x_{kt}$  is 1.

| m    | 90 %        | 95 %        | 97,5 %      | 99 %         | m    | 90 %    | 95 %    | 97,5 %  | 99 %    |
|------|-------------|-------------|-------------|--------------|------|---------|---------|---------|---------|
| 0.10 | 38968334.08 | 62878251.64 | 92831136.82 | 145060732.74 | 0.51 | 1708.23 | 2778.27 | 4141.24 | 6426.20 |
| 0.11 | 23167326.25 | 37545034.69 | 56199746.01 | 87302780.63  | 0.52 | 1471.00 | 2394.13 | 3556.50 | 5452.97 |
| 0.12 | 14271993.05 | 23063307.30 | 34340441.10 | 53043239.82  | 0.53 | 1251.91 | 2025.44 | 2994.67 | 4663.86 |
| 0.13 | 9085655.91  | 14695412.98 | 21934975.30 | 34193900.69  | 0.54 | 1084.98 | 1741.51 | 2570.48 | 3983.41 |
| 0.14 | 6070224.77  | 9852512.35  | 14552662.65 | 22469074.80  | 0.55 | 918.65  | 1476.20 | 2188.04 | 3445.47 |
| 0.15 | 4150528.02  | 6714496.73  | 10108446.51 | 15499073.44  | 0.56 | 785.50  | 1282.54 | 1891.64 | 2945.57 |
| 0.16 | 2878115.42  | 4697459.35  | 6878582.18  | 11009164.82  | 0.57 | 675.07  | 1092.81 | 1607.58 | 2459.65 |
| 0.17 | 2055367.90  | 3307874.67  | 4907569.49  | 7684508.17   | 0.58 | 575.34  | 928.85  | 1370.41 | 2087.21 |
| 0.18 | 1485388.88  | 2394454.38  | 3551258.50  | 5611753.23   | 0.59 | 492.77  | 790.26  | 1185.36 | 1817.41 |
| 0.19 | 1077224.42  | 1770954.96  | 2636363.53  | 4043042.46   | 0.60 | 423.90  | 683.21  | 1006.27 | 1537.52 |
| 0.20 | 802835.80   | 1310418.35  | 1982480.92  | 3030669.14   | 0.61 | 362.24  | 580.45  | 851.53  | 1309.79 |
| 0.21 | 601778.73   | 985355.28   | 1480039.08  | 2333414.11   | 0.62 | 310.77  | 497.71  | 730.46  | 1136.65 |
| 0.22 | 453445.37   | 747094.88   | 1121362.29  | 1780006.89   | 0.63 | 266.00  | 424.81  | 623.05  | 949.10  |
| 0.23 | 352386.56   | 574886.85   | 862435.83   | 1351091.30   | 0.64 | 226.25  | 362.02  | 533.07  | 814.49  |
| 0.24 | 272352.00   | 445261.95   | 662430.40   | 1039936.64   | 0.65 | 193.33  | 306.06  | 456.74  | 695.49  |
| 0.25 | 214341.97   | 349883.34   | 521075.26   | 806972.03    | 0.66 | 164.31  | 262.64  | 387.95  | 595.80  |
| 0.26 | 168293.75   | 272567.54   | 404793.01   | 622421.82    | 0.67 | 139.76  | 222.50  | 327.09  | 503.44  |
| 0.27 | 132789.77   | 215781.77   | 322949.10   | 499140.46    | 0.68 | 117.99  | 189.05  | 277.87  | 427.85  |
| 0.28 | 106388.01   | 173398.50   | 259597.13   | 402670.60    | 0.69 | 100.75  | 160.80  | 238.17  | 358.23  |
| 0.29 | 84938.48    | 139553.10   | 207215.62   | 327419.77    | 0.70 | 85.93   | 136.58  | 198.90  | 301.68  |
| 0.30 | 69169.67    | 112156.33   | 167798.79   | 259809.05    | 0.71 | 72.49   | 114.23  | 166.21  | 250.36  |
| 0.31 | 56485.69    | 91333.25    | 135629.09   | 212372.42    | 0.72 | 61.01   | 95.97   | 140.83  | 211.16  |
| 0.32 | 46159.34    | 74787.79    | 112912.58   | 172547.02    | 0.73 | 51.39   | 81.05   | 117.70  | 178.00  |
| 0.33 | 37775.77    | 61311.35    | 92140.51    | 144027.87    | 0.74 | 43.30   | 68.29   | 98.60   | 148.38  |
| 0.34 | 31071.27    | 50808.94    | 75278.92    | 119458.58    | 0.75 | 36.01   | 57.02   | 81.26   | 122.68  |
| 0.35 | 25569.33    | 41764.05    | 62280.46    | 96344.60     | 0.76 | 30.11   | 47.06   | 67.81   | 101.29  |
| 0.36 | 21119.27    | 34719.33    | 51055.15    | 78905.13     | 0.77 | 24.92   | 38.70   | 55.67   | 82.26   |
| 0.37 | 17623.95    | 28883.68    | 43025.37    | 65938.35     | 0.78 | 20.54   | 31.85   | 45.21   | 67.27   |
| 0.38 | 14743.14    | 24089.75    | 35512.21    | 54959.40     | 0.79 | 16.97   | 26.39   | 37.50   | 55.10   |
| 0.39 | 12350.01    | 20272.11    | 29675.98    | 45310.11     | 0.80 | 13.79   | 21.34   | 30.29   | 43.94   |
| 0.40 | 10459.10    | 16944.43    | 24959.74    | 38492.64     | 0.81 | 11.24   | 17.38   | 24.73   | 36.41   |
| 0.41 | 8785.79     | 14363.77    | 21197.72    | 32552.58     | 0.82 | 9.20    | 14.05   | 20.13   | 29.06   |
| 0.42 | 7404.17     | 12059.10    | 17951.64    | 27420.84     | 0.83 | 7.41    | 11.27   | 16.03   | 23.40   |
| 0.43 | 6238.99     | 10157.21    | 15102.05    | 23723.98     | 0.84 | 5.95    | 9.11    | 12.77   | 18.39   |
| 0.44 | 5260.38     | 8582.39     | 12794.35    | 20048.61     | 0.85 | 4.68    | 7.11    | 10.13   | 14.50   |
| 0.45 | 4467.88     | 7317.41     | 10900.42    | 17022.16     | 0.86 | 3.72    | 5.61    | 7.87    | 11.41   |
| 0.46 | 3829.16     | 6155.27     | 9228.21     | 14419.22     | 0.87 | 2.90    | 4.36    | 6.13    | 8.70    |
| 0.47 | 3236.06     | 5249.20     | 7837.34     | 12326.76     | 0.88 | 2.23    | 3.36    | 4.65    | 6.70    |
| 0.48 | 2762.98     | 4488.98     | 6628.08     | 10444.48     | 0.89 | 1.72    | 2.55    | 3.48    | 4.99    |
| 0.49 | 2358.84     | 3843.17     | 5680.50     | 8828.04      | 0.90 | 1.32    | 1.94    | 2.63    | 3.71    |
| 0.50 | 2015.42     | 3247.23     | 4811.35     | 7516.67      |      |         |         |         |         |

Table S422: Critical values for detector  $\hat{H}_{mov,sn}^{m,0.2}$  with windows size  $n = 0.2$ , and FM-OLS and D-OLS estimation in a model with intercept and linear trend. The number of integrated regressors is 4 and the highest power of  $x_{kt}$  is 1.

| m    | 90 %         | 95 %         | 97,5 %       | 99 %         | m    | 90 %    | 95 %     | 97,5 %   | 99 %     |
|------|--------------|--------------|--------------|--------------|------|---------|----------|----------|----------|
| 0.10 | 155196262.76 | 250493171.12 | 367296902.88 | 577552652.39 | 0.51 | 6711.54 | 10813.71 | 16242.46 | 25559.77 |
| 0.11 | 91327051.77  | 146660976.30 | 218428567.77 | 342099871.44 | 0.52 | 5761.69 | 9260.53  | 13839.44 | 21583.52 |
| 0.12 | 57036153.03  | 91403508.26  | 134076884.66 | 207838331.90 | 0.53 | 4901.79 | 7889.57  | 11868.10 | 18279.07 |
| 0.13 | 36204154.12  | 58538788.64  | 86789541.62  | 133586576.35 | 0.54 | 4169.97 | 6845.48  | 10104.82 | 15552.14 |
| 0.14 | 24253608.86  | 38796935.61  | 57638030.32  | 88018318.77  | 0.55 | 3597.22 | 5847.07  | 8610.31  | 13405.36 |
| 0.15 | 16272026.78  | 26495905.54  | 39127141.08  | 59087840.36  | 0.56 | 3093.09 | 4975.70  | 7411.71  | 11509.79 |
| 0.16 | 11372666.48  | 18382976.12  | 27415678.19  | 42104145.70  | 0.57 | 2666.46 | 4255.66  | 6378.22  | 9669.24  |
| 0.17 | 8072544.41   | 12973897.20  | 19376399.77  | 30217315.77  | 0.58 | 2283.73 | 3623.53  | 5302.17  | 8202.86  |
| 0.18 | 5758342.11   | 9280025.95   | 13907299.10  | 21918009.37  | 0.59 | 1951.79 | 3083.03  | 4522.41  | 6978.28  |
| 0.19 | 4228551.22   | 6817813.17   | 10260661.59  | 16043325.55  | 0.60 | 1669.80 | 2644.72  | 3837.33  | 5846.19  |
| 0.20 | 3143498.22   | 5061200.96   | 7558944.59   | 11824635.67  | 0.61 | 1426.44 | 2277.69  | 3269.15  | 4910.30  |
| 0.21 | 2365425.76   | 3854066.97   | 5741046.33   | 8855364.23   | 0.62 | 1210.89 | 1941.85  | 2807.13  | 4147.01  |
| 0.22 | 1787188.04   | 2947686.85   | 4402451.66   | 6798121.28   | 0.63 | 1041.18 | 1648.52  | 2384.97  | 3566.59  |
| 0.23 | 1381389.74   | 2262288.06   | 3385050.86   | 5217419.07   | 0.64 | 889.42  | 1402.92  | 2035.71  | 3027.99  |
| 0.24 | 1075397.22   | 1767519.58   | 2630418.49   | 4075203.10   | 0.65 | 753.38  | 1191.98  | 1731.43  | 2584.22  |
| 0.25 | 850065.16    | 1368157.41   | 2056124.69   | 3192752.05   | 0.66 | 639.54  | 1018.10  | 1475.43  | 2206.66  |
| 0.26 | 662955.99    | 1066582.58   | 1608735.44   | 2481877.78   | 0.67 | 547.83  | 858.67   | 1250.81  | 1868.51  |
| 0.27 | 524726.86    | 846577.82    | 1274007.26   | 2000325.60   | 0.68 | 463.01  | 728.36   | 1060.14  | 1614.32  |
| 0.28 | 418881.43    | 679970.07    | 1009396.35   | 1589395.66   | 0.69 | 392.75  | 617.99   | 903.46   | 1340.44  |
| 0.29 | 339520.93    | 550996.13    | 814972.43    | 1261945.85   | 0.70 | 334.31  | 526.27   | 763.04   | 1135.25  |
| 0.30 | 274730.28    | 442645.24    | 662978.21    | 1026542.95   | 0.71 | 281.12  | 442.54   | 641.93   | 950.08   |
| 0.31 | 221577.21    | 359597.33    | 542173.77    | 835678.92    | 0.72 | 237.13  | 371.36   | 540.25   | 787.39   |
| 0.32 | 180985.97    | 296243.88    | 438896.57    | 676737.85    | 0.73 | 200.97  | 312.43   | 450.42   | 665.94   |
| 0.33 | 148135.62    | 242749.37    | 359750.28    | 554726.72    | 0.74 | 168.82  | 262.12   | 375.75   | 560.15   |
| 0.34 | 122602.05    | 198258.73    | 295854.20    | 458158.68    | 0.75 | 141.44  | 219.74   | 316.78   | 462.96   |
| 0.35 | 100444.01    | 163667.60    | 244950.66    | 384357.64    | 0.76 | 117.81  | 183.49   | 260.80   | 388.56   |
| 0.36 | 83410.15     | 135942.44    | 203863.27    | 316281.00    | 0.77 | 97.77   | 150.51   | 216.83   | 318.48   |
| 0.37 | 69695.80     | 112345.38    | 169207.52    | 263711.24    | 0.78 | 81.15   | 124.24   | 177.27   | 259.50   |
| 0.38 | 58114.98     | 94482.66     | 141004.25    | 218595.29    | 0.79 | 66.74   | 102.09   | 144.84   | 212.35   |
| 0.39 | 48775.50     | 79875.70     | 118291.48    | 180704.63    | 0.80 | 55.16   | 83.48    | 117.00   | 171.57   |
| 0.40 | 41041.78     | 66703.04     | 99953.90     | 152367.21    | 0.81 | 44.91   | 67.69    | 95.40    | 139.17   |
| 0.41 | 34744.64     | 56497.74     | 84424.68     | 129813.64    | 0.82 | 36.49   | 55.09    | 77.37    | 110.50   |
| 0.42 | 29396.01     | 47393.23     | 71547.34     | 110371.37    | 0.83 | 29.64   | 44.36    | 62.14    | 88.82    |
| 0.43 | 24726.53     | 40120.43     | 59950.57     | 93408.04     | 0.84 | 23.86   | 35.69    | 49.41    | 71.60    |
| 0.44 | 20891.46     | 33914.87     | 50570.99     | 79463.35     | 0.85 | 18.99   | 28.44    | 39.29    | 56.60    |
| 0.45 | 17724.41     | 28924.64     | 42892.69     | 67352.23     | 0.86 | 15.06   | 22.36    | 30.90    | 44.32    |
| 0.46 | 15016.82     | 24599.52     | 36368.50     | 56952.09     | 0.87 | 11.85   | 17.53    | 24.07    | 34.14    |
| 0.47 | 12815.89     | 20948.94     | 30820.84     | 48311.51     | 0.88 | 9.26    | 13.59    | 18.49    | 25.93    |
| 0.48 | 10883.62     | 17823.30     | 26593.97     | 40982.95     | 0.89 | 7.15    | 10.43    | 13.96    | 19.60    |
| 0.49 | 9286.38      | 15088.73     | 22612.06     | 35491.52     | 0.90 | 5.45    | 7.86     | 10.64    | 14.71    |
| 0.50 | 7884.96      | 12803.37     | 19314.14     | 29964.75     |      |         |          |          |          |

Table S423: Critical values for detector  $\hat{H}_{mov,sn}^{m,0.2}$  with windows size  $n = 0.2$ , and IM-OLS estimation in a model with intercept and linear trend. The number of integrated regressors is 4 and the highest power of  $x_{kt}$  is 1.



| m    | 90 %        | 95 %        | 97,5 %       | 99 %         | m    | 90 %    | 95 %    | 97,5 %  | 99 %    |
|------|-------------|-------------|--------------|--------------|------|---------|---------|---------|---------|
| 0.10 | 44393312.18 | 71629952.68 | 106886516.50 | 166789758.11 | 0.51 | 1889.96 | 3072.85 | 4595.22 | 7065.36 |
| 0.11 | 26471384.51 | 43200180.83 | 64670844.07  | 100487973.46 | 0.52 | 1619.82 | 2639.12 | 3923.99 | 5985.95 |
| 0.12 | 16341711.58 | 26534230.49 | 39638550.58  | 61588061.76  | 0.53 | 1376.55 | 2221.99 | 3291.42 | 5107.91 |
| 0.13 | 10427082.46 | 16985079.21 | 25469776.02  | 39720950.53  | 0.54 | 1188.44 | 1904.99 | 2817.34 | 4339.50 |
| 0.14 | 7016442.59  | 11450329.71 | 16910988.40  | 26324388.63  | 0.55 | 1003.92 | 1611.75 | 2388.24 | 3746.55 |
| 0.15 | 4785506.41  | 7799204.33  | 11778667.56  | 18201184.01  | 0.56 | 852.60  | 1392.73 | 2051.88 | 3189.52 |
| 0.16 | 3338706.63  | 5485809.23  | 8104259.67   | 12945614.50  | 0.57 | 729.84  | 1186.55 | 1738.51 | 2664.32 |
| 0.17 | 2379159.93  | 3856772.50  | 5765253.84   | 8992124.40   | 0.58 | 620.80  | 998.76  | 1473.28 | 2253.88 |
| 0.18 | 1719949.11  | 2790753.19  | 4186395.70   | 6608795.63   | 0.59 | 529.30  | 849.05  | 1265.67 | 1952.99 |
| 0.19 | 1250964.41  | 2068600.69  | 3086177.01   | 4750469.30   | 0.60 | 453.01  | 729.76  | 1066.20 | 1635.14 |
| 0.20 | 935421.53   | 1531199.23  | 2324395.60   | 3574218.33   | 0.61 | 386.09  | 618.07  | 901.66  | 1394.11 |
| 0.21 | 701191.60   | 1153303.48  | 1731472.03   | 2747707.69   | 0.62 | 329.63  | 526.03  | 771.03  | 1201.25 |
| 0.22 | 529088.30   | 875208.75   | 1317476.85   | 2095583.23   | 0.63 | 280.51  | 447.15  | 656.13  | 1000.21 |
| 0.23 | 409412.47   | 674179.88   | 1012045.31   | 1597933.08   | 0.64 | 237.70  | 379.44  | 558.49  | 853.39  |
| 0.24 | 317512.02   | 520464.00   | 776293.50    | 1228078.34   | 0.65 | 202.11  | 319.58  | 474.89  | 723.88  |
| 0.25 | 249342.21   | 409326.30   | 609858.60    | 951156.44    | 0.66 | 171.09  | 273.14  | 403.17  | 618.64  |
| 0.26 | 195477.67   | 318666.23   | 474957.69    | 733827.23    | 0.67 | 144.88  | 230.48  | 338.04  | 520.96  |
| 0.27 | 154558.39   | 252051.22   | 378993.75    | 582739.03    | 0.68 | 121.96  | 194.87  | 286.52  | 438.78  |
| 0.28 | 123478.12   | 202484.09   | 303704.66    | 470811.79    | 0.69 | 103.73  | 164.82  | 244.38  | 366.44  |
| 0.29 | 98604.29    | 162830.64   | 241907.39    | 382459.77    | 0.70 | 87.73   | 139.57  | 203.12  | 307.74  |
| 0.30 | 80196.99    | 130683.57   | 195771.64    | 304025.66    | 0.71 | 73.99   | 116.32  | 169.12  | 253.64  |
| 0.31 | 65512.96    | 106075.35   | 157683.56    | 248405.71    | 0.72 | 62.01   | 97.37   | 142.85  | 214.50  |
| 0.32 | 53333.53    | 86740.63    | 131555.29    | 201961.19    | 0.73 | 52.06   | 82.07   | 118.95  | 179.93  |
| 0.33 | 43603.87    | 71088.27    | 106809.92    | 166985.48    | 0.74 | 43.70   | 68.90   | 99.29   | 149.53  |
| 0.34 | 35842.03    | 58595.64    | 87228.37     | 138662.27    | 0.75 | 36.28   | 57.34   | 81.76   | 123.18  |
| 0.35 | 29460.69    | 48224.97    | 72024.87     | 110915.63    | 0.76 | 30.31   | 47.26   | 68.12   | 101.71  |
| 0.36 | 24261.67    | 39951.79    | 58946.34     | 90938.34     | 0.77 | 25.05   | 38.83   | 55.79   | 82.50   |
| 0.37 | 20248.03    | 33101.26    | 49354.79     | 76045.84     | 0.78 | 20.63   | 31.95   | 45.30   | 67.42   |
| 0.38 | 16846.12    | 27571.07    | 40955.76     | 63180.69     | 0.79 | 17.06   | 26.49   | 37.60   | 55.18   |
| 0.39 | 14064.16    | 23222.85    | 34047.57     | 52165.71     | 0.80 | 13.91   | 21.45   | 30.39   | 44.06   |
| 0.40 | 11927.52    | 19349.37    | 28608.48     | 43991.15     | 0.81 | 11.36   | 17.51   | 24.85   | 36.52   |
| 0.41 | 10003.56    | 16377.76    | 24134.76     | 37194.44     | 0.82 | 9.34    | 14.17   | 20.24   | 29.16   |
| 0.42 | 8406.81     | 13707.08    | 20466.93     | 31264.18     | 0.83 | 7.53    | 11.40   | 16.15   | 23.53   |
| 0.43 | 7057.06     | 11498.64    | 17019.98     | 26783.50     | 0.84 | 6.06    | 9.22    | 12.89   | 18.53   |
| 0.44 | 5927.17     | 9705.04     | 14465.93     | 22599.25     | 0.85 | 4.81    | 7.24    | 10.25   | 14.61   |
| 0.45 | 5029.70     | 8239.64     | 12305.83     | 19124.34     | 0.86 | 3.84    | 5.73    | 7.99    | 11.55   |
| 0.46 | 4294.92     | 6937.85     | 10358.41     | 16183.10     | 0.87 | 3.02    | 4.49    | 6.25    | 8.81    |
| 0.47 | 3626.60     | 5883.59     | 8772.04      | 13814.52     | 0.88 | 2.36    | 3.49    | 4.77    | 6.82    |
| 0.48 | 3084.09     | 5008.90     | 7435.52      | 11642.82     | 0.89 | 1.85    | 2.67    | 3.60    | 5.12    |
| 0.49 | 2623.18     | 4273.54     | 6335.57      | 9819.71      | 0.90 | 1.44    | 2.06    | 2.75    | 3.84    |
| 0.50 | 2234.11     | 3616.19     | 5350.18      | 8316.52      |      |         |         |         |         |

Table S424: Critical values for detector  $\hat{H}_{mov,sn}^{m,0.3}$  with windows size  $n = 0.3$ , and FM-OLS and D-OLS estimation in a model with intercept and linear trend. The number of integrated regressors is 4 and the highest power of  $x_{kt}$  is 1.

| m    | 90 %         | 95 %         | 97,5 %       | 99 %         | m    | 90 %    | 95 %     | 97,5 %   | 99 %     |
|------|--------------|--------------|--------------|--------------|------|---------|----------|----------|----------|
| 0.10 | 175769213.85 | 284819629.93 | 422467483.39 | 662502270.22 | 0.51 | 7429.87 | 11997.95 | 17963.20 | 28283.40 |
| 0.11 | 104173406.61 | 168432427.96 | 251058170.07 | 395012269.79 | 0.52 | 6358.62 | 10207.24 | 15239.26 | 23749.00 |
| 0.12 | 65163468.97  | 105111299.89 | 154199761.07 | 241876918.84 | 0.53 | 5386.70 | 8674.17  | 13005.72 | 20000.46 |
| 0.13 | 41634676.82  | 67198580.56  | 100969283.60 | 156677584.12 | 0.54 | 4566.98 | 7491.29  | 11038.24 | 17003.09 |
| 0.14 | 27818063.88  | 45018873.31  | 66744812.95  | 102176427.49 | 0.55 | 3921.13 | 6391.67  | 9364.12  | 14612.78 |
| 0.15 | 18796920.23  | 30735594.12  | 45501407.73  | 69286623.68  | 0.56 | 3364.26 | 5394.24  | 8066.30  | 12529.63 |
| 0.16 | 13137663.28  | 21411840.84  | 32085714.74  | 49284164.77  | 0.57 | 2880.45 | 4595.80  | 6906.07  | 10416.26 |
| 0.17 | 9331479.29   | 15170263.25  | 22685592.93  | 35496391.90  | 0.58 | 2464.17 | 3902.27  | 5711.22  | 8812.70  |
| 0.18 | 6684750.99   | 10865369.40  | 16361503.32  | 25822996.60  | 0.59 | 2093.38 | 3303.24  | 4856.41  | 7503.44  |
| 0.19 | 4908560.74   | 7988253.69   | 12028991.82  | 18921805.37  | 0.60 | 1786.00 | 2828.42  | 4099.12  | 6220.05  |
| 0.20 | 3651677.24   | 5920706.27   | 8912887.29   | 13934526.96  | 0.61 | 1520.75 | 2423.46  | 3476.06  | 5188.29  |
| 0.21 | 2757907.10   | 4511052.28   | 6723013.98   | 10468103.60  | 0.62 | 1286.15 | 2055.64  | 2962.14  | 4388.84  |
| 0.22 | 2086684.02   | 3445548.30   | 5174587.05   | 8037812.30   | 0.63 | 1100.48 | 1739.79  | 2520.40  | 3746.93  |
| 0.23 | 1609699.76   | 2646584.49   | 3977497.26   | 6155483.96   | 0.64 | 938.99  | 1475.94  | 2133.94  | 3167.56  |
| 0.24 | 1254059.25   | 2066424.96   | 3091308.18   | 4784273.41   | 0.65 | 789.86  | 1247.09  | 1804.38  | 2687.64  |
| 0.25 | 988544.65    | 1606813.34   | 2407568.28   | 3757255.59   | 0.66 | 667.55  | 1060.89  | 1531.21  | 2287.24  |
| 0.26 | 769184.71    | 1251336.25   | 1892081.82   | 2919332.01   | 0.67 | 568.78  | 890.76   | 1296.91  | 1934.48  |
| 0.27 | 611085.05    | 989868.70    | 1494148.13   | 2356712.33   | 0.68 | 479.32  | 751.62   | 1091.12  | 1660.01  |
| 0.28 | 486123.58    | 793274.70    | 1179892.34   | 1860303.83   | 0.69 | 403.91  | 635.67   | 928.02   | 1373.14  |
| 0.29 | 394142.16    | 643816.38    | 953422.59    | 1483321.63   | 0.70 | 342.98  | 538.22   | 780.58   | 1160.15  |
| 0.30 | 317580.39    | 515662.32    | 775471.34    | 1195298.53   | 0.71 | 287.02  | 451.56   | 653.16   | 964.78   |
| 0.31 | 256990.60    | 418577.90    | 631010.03    | 978577.92    | 0.72 | 241.13  | 377.71   | 547.36   | 795.82   |
| 0.32 | 209302.61    | 343831.92    | 509118.26    | 786111.26    | 0.73 | 203.78  | 316.25   | 455.68   | 673.16   |
| 0.33 | 171003.01    | 281572.20    | 417200.22    | 641892.97    | 0.74 | 171.06  | 264.64   | 378.86   | 564.43   |
| 0.34 | 141419.38    | 229337.88    | 341090.62    | 533535.25    | 0.75 | 142.66  | 221.38   | 318.70   | 465.28   |
| 0.35 | 115927.35    | 189071.38    | 282803.06    | 443947.54    | 0.76 | 118.58  | 184.50   | 262.10   | 390.98   |
| 0.36 | 95862.30     | 156429.74    | 235766.19    | 362902.96    | 0.77 | 98.13   | 151.07   | 217.57   | 319.14   |
| 0.37 | 79836.97     | 129217.00    | 195368.23    | 304012.31    | 0.78 | 81.40   | 124.54   | 177.59   | 259.82   |
| 0.38 | 66538.75     | 108773.23    | 161410.63    | 251263.26    | 0.79 | 66.93   | 102.30   | 145.05   | 212.44   |
| 0.39 | 55775.68     | 91599.76     | 135484.75    | 206712.57    | 0.80 | 55.28   | 83.59    | 117.14   | 171.66   |
| 0.40 | 46849.32     | 76197.17     | 114442.71    | 173751.89    | 0.81 | 45.03   | 67.80    | 95.51    | 139.32   |
| 0.41 | 39481.61     | 64368.87     | 96534.30     | 147448.55    | 0.82 | 36.59   | 55.18    | 77.48    | 110.68   |
| 0.42 | 33329.84     | 54008.52     | 81342.23     | 125344.46    | 0.83 | 29.76   | 44.48    | 62.23    | 88.92    |
| 0.43 | 27948.56     | 45545.21     | 68018.31     | 105575.03    | 0.84 | 23.97   | 35.81    | 49.53    | 71.75    |
| 0.44 | 23608.32     | 38311.68     | 57249.56     | 89719.72     | 0.85 | 19.10   | 28.54    | 39.39    | 56.71    |
| 0.45 | 19932.82     | 32591.46     | 48282.19     | 75558.32     | 0.86 | 15.18   | 22.49    | 31.02    | 44.41    |
| 0.46 | 16877.78     | 27569.53     | 40875.16     | 63937.99     | 0.87 | 11.97   | 17.64    | 24.19    | 34.26    |
| 0.47 | 14362.33     | 23466.69     | 34576.45     | 54026.88     | 0.88 | 9.37    | 13.68    | 18.60    | 26.07    |
| 0.48 | 12201.27     | 19906.02     | 29570.22     | 45909.15     | 0.89 | 7.26    | 10.54    | 14.08    | 19.72    |
| 0.49 | 10329.24     | 16816.70     | 25123.21     | 39294.39     | 0.90 | 5.56    | 7.97     | 10.75    | 14.81    |
| 0.50 | 8745.22      | 14187.66     | 21355.90     | 33275.45     |      |         |          |          |          |

Table S425: Critical values for detector  $\hat{H}_{mov,sn}^{m,0.3}$  with windows size  $n = 0.3$ , and IM-OLS estimation in a model with intercept and linear trend. The number of integrated regressors is 4 and the highest power of  $x_{kt}$  is 1.

| m    | 90 %        | 95 %        | 97,5 %       | 99 %         | m    | 90 %   | 95 %    | 97,5 %  | 99 %    |
|------|-------------|-------------|--------------|--------------|------|--------|---------|---------|---------|
| 0.10 | 19907018.44 | 49691609.69 | 107010056.93 | 256747179.67 | 0.51 | 995.17 | 2037.56 | 3907.16 | 8230.65 |
| 0.11 | 11811978.96 | 29854513.60 | 63602716.53  | 149510739.44 | 0.52 | 858.64 | 1753.48 | 3332.37 | 7034.29 |
| 0.12 | 7415394.40  | 18294081.45 | 39471466.12  | 94255684.50  | 0.53 | 730.89 | 1492.22 | 2794.91 | 5893.28 |
| 0.13 | 4897190.42  | 12231085.92 | 25916934.07  | 59993558.57  | 0.54 | 628.86 | 1279.96 | 2378.20 | 5009.58 |
| 0.14 | 3232781.19  | 7951193.41  | 17202337.60  | 39547720.84  | 0.55 | 538.65 | 1088.10 | 2010.97 | 4202.78 |
| 0.15 | 2230187.51  | 5401930.85  | 11619356.49  | 27467321.75  | 0.56 | 463.04 | 935.61  | 1713.97 | 3569.87 |
| 0.16 | 1522574.75  | 3742871.10  | 8059210.89   | 18737901.15  | 0.57 | 401.02 | 801.87  | 1451.88 | 2981.18 |
| 0.17 | 1092181.43  | 2654490.28  | 5599791.75   | 13107338.47  | 0.58 | 340.66 | 682.00  | 1248.54 | 2644.76 |
| 0.18 | 783222.40   | 1896701.81  | 4107811.18   | 9796857.91   | 0.59 | 291.10 | 583.84  | 1061.60 | 2213.53 |
| 0.19 | 580270.08   | 1376012.69  | 2990982.63   | 7082488.18   | 0.60 | 250.26 | 494.35  | 920.46  | 1901.97 |
| 0.20 | 427603.22   | 1021734.63  | 2189601.75   | 5071033.06   | 0.61 | 218.26 | 421.89  | 783.42  | 1609.67 |
| 0.21 | 328490.88   | 775237.92   | 1663387.27   | 3807634.19   | 0.62 | 187.04 | 360.14  | 657.35  | 1360.04 |
| 0.22 | 247878.71   | 589339.03   | 1258293.04   | 2900558.42   | 0.63 | 161.29 | 312.78  | 552.59  | 1113.87 |
| 0.23 | 190355.97   | 450746.63   | 968071.03    | 2202893.24   | 0.64 | 138.57 | 263.54  | 470.63  | 958.02  |
| 0.24 | 146463.74   | 349190.87   | 738178.42    | 1717405.14   | 0.65 | 118.91 | 225.54  | 407.25  | 809.19  |
| 0.25 | 115618.13   | 270301.82   | 579156.78    | 1316692.25   | 0.66 | 102.03 | 191.71  | 345.75  | 692.21  |
| 0.26 | 91988.13    | 211242.16   | 441734.78    | 1035609.90   | 0.67 | 87.11  | 163.85  | 290.78  | 585.67  |
| 0.27 | 72344.81    | 167740.69   | 351784.75    | 823513.15    | 0.68 | 74.81  | 140.00  | 244.36  | 494.97  |
| 0.28 | 58255.21    | 134551.99   | 279498.72    | 632949.25    | 0.69 | 63.63  | 118.59  | 209.55  | 409.58  |
| 0.29 | 47118.98    | 105699.60   | 221919.19    | 531775.63    | 0.70 | 54.41  | 101.45  | 174.29  | 346.50  |
| 0.30 | 37949.40    | 85935.86    | 178990.16    | 430165.56    | 0.71 | 46.77  | 85.93   | 147.21  | 283.51  |
| 0.31 | 31128.48    | 70394.37    | 147282.44    | 345072.80    | 0.72 | 40.25  | 72.64   | 123.42  | 233.84  |
| 0.32 | 25522.93    | 57924.04    | 120588.07    | 282416.09    | 0.73 | 34.00  | 61.65   | 103.45  | 192.14  |
| 0.33 | 20816.97    | 47257.20    | 97068.25     | 226916.27    | 0.74 | 29.01  | 52.27   | 86.69   | 163.25  |
| 0.34 | 17573.27    | 39401.32    | 79618.44     | 182938.91    | 0.75 | 24.51  | 43.51   | 72.23   | 133.85  |
| 0.35 | 14493.03    | 32379.21    | 64467.55     | 149828.37    | 0.76 | 20.63  | 36.54   | 60.32   | 108.90  |
| 0.36 | 12066.76    | 26683.03    | 53723.92     | 122327.04    | 0.77 | 17.19  | 30.22   | 49.84   | 89.84   |
| 0.37 | 10057.70    | 22156.37    | 44756.76     | 102072.00    | 0.78 | 14.37  | 25.07   | 40.94   | 71.11   |
| 0.38 | 8274.45     | 18414.70    | 36995.51     | 84579.31     | 0.79 | 12.11  | 20.84   | 33.37   | 59.84   |
| 0.39 | 6951.56     | 15336.63    | 31120.67     | 68376.98     | 0.80 | 10.08  | 17.10   | 26.65   | 46.63   |
| 0.40 | 5915.21     | 12815.06    | 25975.90     | 56191.23     | 0.81 | 8.32   | 14.13   | 21.94   | 37.69   |
| 0.41 | 4983.53     | 10715.72    | 21497.78     | 47149.65     | 0.82 | 6.88   | 11.55   | 18.07   | 30.83   |
| 0.42 | 4193.29     | 8990.63     | 17994.20     | 39365.93     | 0.83 | 5.61   | 9.29    | 14.47   | 24.55   |
| 0.43 | 3551.16     | 7593.67     | 14837.08     | 32722.90     | 0.84 | 4.53   | 7.51    | 11.56   | 19.43   |
| 0.44 | 2997.67     | 6451.98     | 12722.03     | 27808.96     | 0.85 | 3.66   | 5.96    | 9.14    | 15.16   |
| 0.45 | 2555.67     | 5486.65     | 10713.53     | 23261.61     | 0.86 | 2.91   | 4.71    | 7.13    | 11.58   |
| 0.46 | 2175.63     | 4651.20     | 9011.39      | 20129.35     | 0.87 | 2.29   | 3.66    | 5.50    | 8.86    |
| 0.47 | 1841.33     | 3946.22     | 7518.96      | 16471.47     | 0.88 | 1.77   | 2.81    | 4.18    | 6.63    |
| 0.48 | 1587.58     | 3339.65     | 6458.44      | 14119.67     | 0.89 | 1.34   | 2.11    | 3.12    | 4.92    |
| 0.49 | 1358.75     | 2867.70     | 5507.15      | 11513.81     | 0.90 | 1.01   | 1.58    | 2.30    | 3.55    |
| 0.50 | 1157.51     | 2400.60     | 4580.69      | 10046.25     |      |        |         |         |         |

Table S426: Critical values for detector  $\hat{H}_{mov,sn}^{m,0.1}$  with windows size  $n = 0.1$ , and FM-OLS and D-OLS estimation in a model with intercept. The number of integrated regressors is 4 and the highest power of  $x_{kt}$  is 2.

| m    | 90 %         | 95 %         | 97,5 %       | 99 %          | m    | 90 %    | 95 %     | 97,5 %   | 99 %     |
|------|--------------|--------------|--------------|---------------|------|---------|----------|----------|----------|
| 0.10 | 118013251.68 | 303887899.60 | 679331475.96 | 1641067964.81 | 0.51 | 5493.58 | 11674.51 | 23440.56 | 52829.62 |
| 0.11 | 70955318.82  | 184012916.32 | 406135432.98 | 1022068389.59 | 0.52 | 4648.24 | 9905.63  | 20004.92 | 44649.79 |
| 0.12 | 43900432.97  | 113733041.83 | 254720326.03 | 627478039.85  | 0.53 | 3980.40 | 8413.04  | 16626.30 | 36897.29 |
| 0.13 | 28821709.05  | 72646118.62  | 164512696.65 | 397837434.12  | 0.54 | 3392.75 | 7179.15  | 14120.38 | 31224.53 |
| 0.14 | 19198047.58  | 48200031.64  | 107174551.00 | 263932062.05  | 0.55 | 2911.31 | 6103.84  | 11991.24 | 26295.36 |
| 0.15 | 13054960.62  | 33120098.98  | 73362505.40  | 181175973.73  | 0.56 | 2484.52 | 5159.69  | 10153.26 | 21959.54 |
| 0.16 | 9180679.06   | 22917986.42  | 50149035.42  | 125340857.63  | 0.57 | 2139.69 | 4397.76  | 8567.30  | 19130.27 |
| 0.17 | 6408703.14   | 16112966.24  | 34916355.77  | 85031659.95   | 0.58 | 1851.09 | 3798.92  | 7260.90  | 16068.10 |
| 0.18 | 4527977.42   | 11548501.96  | 24716146.11  | 61043898.91   | 0.59 | 1596.89 | 3268.51  | 6201.99  | 13412.13 |
| 0.19 | 3329951.48   | 8181161.98   | 17515295.81  | 43656466.66   | 0.60 | 1376.70 | 2796.37  | 5321.69  | 11386.48 |
| 0.20 | 2486870.22   | 6145369.75   | 12958118.51  | 31934792.39   | 0.61 | 1189.48 | 2389.44  | 4484.60  | 9807.30  |
| 0.21 | 1878578.18   | 4594349.10   | 9702086.66   | 23931410.83   | 0.62 | 1017.23 | 2031.90  | 3826.23  | 8270.64  |
| 0.22 | 1417474.55   | 3440273.87   | 7430834.60   | 17538445.99   | 0.63 | 875.83  | 1741.56  | 3258.32  | 6803.05  |
| 0.23 | 1091499.53   | 2682595.66   | 5780560.47   | 13193023.49   | 0.64 | 753.90  | 1500.31  | 2727.23  | 5752.39  |
| 0.24 | 853870.13    | 2092716.33   | 4522875.32   | 10224062.04   | 0.65 | 646.71  | 1269.21  | 2318.21  | 4785.35  |
| 0.25 | 677056.76    | 1657275.54   | 3580006.85   | 8281447.86    | 0.66 | 552.84  | 1069.93  | 1957.84  | 4044.56  |
| 0.26 | 530583.88    | 1296325.99   | 2852183.78   | 6589140.46    | 0.67 | 472.56  | 904.20   | 1645.32  | 3351.44  |
| 0.27 | 421618.84    | 1014038.41   | 2202569.55   | 5229962.95    | 0.68 | 400.56  | 763.74   | 1392.90  | 2848.54  |
| 0.28 | 334331.27    | 806572.41    | 1721275.78   | 4000829.20    | 0.69 | 341.29  | 648.41   | 1194.33  | 2394.37  |
| 0.29 | 269016.63    | 639954.08    | 1389164.72   | 3191262.41    | 0.70 | 290.86  | 551.57   | 1016.22  | 1998.06  |
| 0.30 | 215823.13    | 509496.89    | 1102395.22   | 2551239.15    | 0.71 | 248.03  | 470.04   | 841.09   | 1677.68  |
| 0.31 | 174992.48    | 415803.87    | 892107.00    | 2097739.78    | 0.72 | 210.14  | 398.08   | 703.57   | 1436.92  |
| 0.32 | 143260.16    | 338779.64    | 712189.45    | 1715114.92    | 0.73 | 178.04  | 335.74   | 585.39   | 1170.15  |
| 0.33 | 117314.09    | 276799.80    | 583873.78    | 1361917.40    | 0.74 | 152.14  | 280.04   | 485.10   | 968.56   |
| 0.34 | 97270.76     | 226771.00    | 486201.04    | 1161821.35    | 0.75 | 127.70  | 235.30   | 403.84   | 804.29   |
| 0.35 | 80454.94     | 187891.18    | 406261.52    | 953319.54     | 0.76 | 107.28  | 194.52   | 333.32   | 648.95   |
| 0.36 | 67589.28     | 154772.89    | 332373.41    | 799165.88     | 0.77 | 89.62   | 160.55   | 274.44   | 524.72   |
| 0.37 | 56205.01     | 128285.21    | 271836.57    | 639391.38     | 0.78 | 74.19   | 131.43   | 223.91   | 421.18   |
| 0.38 | 46834.88     | 106442.19    | 224781.40    | 529072.61     | 0.79 | 61.57   | 108.55   | 179.52   | 342.03   |
| 0.39 | 39208.94     | 88263.44     | 183622.41    | 442448.50     | 0.80 | 51.28   | 88.94    | 145.29   | 272.58   |
| 0.40 | 32877.47     | 74585.30     | 154696.32    | 354070.15     | 0.81 | 42.25   | 73.18    | 118.35   | 220.16   |
| 0.41 | 27884.48     | 62176.41     | 128375.54    | 286587.65     | 0.82 | 34.72   | 59.62    | 95.49    | 175.17   |
| 0.42 | 23207.98     | 52131.35     | 105821.47    | 239758.25     | 0.83 | 28.44   | 48.31    | 76.62    | 134.68   |
| 0.43 | 19281.20     | 43601.05     | 87315.40     | 204127.55     | 0.84 | 23.30   | 38.77    | 60.18    | 105.25   |
| 0.44 | 16248.17     | 36315.73     | 73183.31     | 172481.83     | 0.85 | 18.87   | 30.88    | 47.39    | 80.67    |
| 0.45 | 13810.92     | 30687.53     | 61982.61     | 145633.12     | 0.86 | 15.05   | 24.34    | 36.87    | 62.11    |
| 0.46 | 11871.31     | 26421.62     | 52995.06     | 120933.64     | 0.87 | 11.91   | 19.00    | 28.60    | 47.65    |
| 0.47 | 10158.06     | 22512.57     | 44731.56     | 101490.00     | 0.88 | 9.34    | 14.73    | 21.91    | 35.56    |
| 0.48 | 8666.55      | 19111.54     | 38474.77     | 86517.89      | 0.89 | 7.24    | 11.20    | 16.28    | 26.42    |
| 0.49 | 7432.11      | 16278.53     | 32513.83     | 71833.24      | 0.90 | 5.47    | 8.40     | 12.20    | 19.34    |
| 0.50 | 6410.27      | 13747.30     | 27569.16     | 61127.92      |      |         |          |          |          |

Table S427: Critical values for detector  $\hat{H}_{mov,sn}^{m,0.1}$  with windows size  $n = 0.1$ , and IM-OLS estimation in a model with intercept. The number of integrated regressors is 4 and the highest power of  $x_{kt}$  is 2.

| m    | 90 %        | 95 %        | 97,5 %       | 99 %         | m    | 90 %    | 95 %    | 97,5 %  | 99 %     |
|------|-------------|-------------|--------------|--------------|------|---------|---------|---------|----------|
| 0.10 | 30713848.81 | 76940859.25 | 167393281.35 | 404033768.82 | 0.51 | 1431.41 | 2897.71 | 5523.08 | 11529.86 |
| 0.11 | 18306380.86 | 46426118.08 | 99887957.77  | 234186591.95 | 0.52 | 1236.02 | 2488.38 | 4684.78 | 9759.11  |
| 0.12 | 11453320.94 | 28323879.04 | 61667841.12  | 149696858.12 | 0.53 | 1042.47 | 2122.65 | 3905.31 | 8142.79  |
| 0.13 | 7562615.99  | 19086131.64 | 40090969.65  | 93434000.63  | 0.54 | 891.69  | 1801.82 | 3356.29 | 6900.80  |
| 0.14 | 4998687.72  | 12388914.49 | 26879128.36  | 62110669.19  | 0.55 | 763.88  | 1529.81 | 2812.04 | 5765.00  |
| 0.15 | 3432452.87  | 8379275.32  | 18012193.03  | 42817283.45  | 0.56 | 654.32  | 1305.36 | 2387.47 | 4885.16  |
| 0.16 | 2358640.64  | 5818029.01  | 12567803.96  | 29125368.06  | 0.57 | 565.66  | 1115.41 | 2006.28 | 4045.21  |
| 0.17 | 1695469.05  | 4134484.64  | 8727186.88   | 20433706.47  | 0.58 | 474.22  | 938.00  | 1703.39 | 3544.28  |
| 0.18 | 1213108.09  | 2946437.82  | 6392301.56   | 15111716.93  | 0.59 | 404.14  | 800.20  | 1451.13 | 2933.13  |
| 0.19 | 892843.95   | 2125318.10  | 4623059.63   | 11031473.47  | 0.60 | 346.12  | 675.58  | 1233.68 | 2509.81  |
| 0.20 | 662391.46   | 1568557.55  | 3405934.11   | 7908106.35   | 0.61 | 298.99  | 570.80  | 1042.43 | 2115.43  |
| 0.21 | 508375.73   | 1205891.06  | 2578802.62   | 5930797.92   | 0.62 | 254.40  | 484.94  | 878.73  | 1787.78  |
| 0.22 | 384294.37   | 911561.14   | 1932888.34   | 4490734.84   | 0.63 | 218.77  | 417.97  | 726.75  | 1446.68  |
| 0.23 | 292998.12   | 699017.56   | 1484794.78   | 3428057.22   | 0.64 | 186.25  | 348.90  | 616.91  | 1224.94  |
| 0.24 | 227192.49   | 538297.00   | 1140560.16   | 2644806.33   | 0.65 | 159.01  | 295.96  | 532.47  | 1036.72  |
| 0.25 | 178099.71   | 415287.76   | 887164.86    | 2029399.40   | 0.66 | 135.34  | 250.11  | 446.86  | 874.41   |
| 0.26 | 141646.98   | 324528.15   | 676745.49    | 1590728.01   | 0.67 | 113.98  | 211.65  | 372.19  | 732.26   |
| 0.27 | 110778.98   | 256448.57   | 540565.12    | 1261969.56   | 0.68 | 97.35   | 179.21  | 308.65  | 612.33   |
| 0.28 | 89447.28    | 203886.19   | 425131.16    | 973994.20    | 0.69 | 82.26   | 152.05  | 261.75  | 506.05   |
| 0.29 | 72216.87    | 161023.08   | 341378.95    | 808859.77    | 0.70 | 69.75   | 127.14  | 216.20  | 422.66   |
| 0.30 | 58135.88    | 131650.88   | 272906.49    | 646306.42    | 0.71 | 59.15   | 106.58  | 181.15  | 343.48   |
| 0.31 | 47466.17    | 106441.69   | 223790.56    | 525463.48    | 0.72 | 50.30   | 89.77   | 150.49  | 282.83   |
| 0.32 | 38957.04    | 87393.27    | 182599.01    | 429326.26    | 0.73 | 41.96   | 75.21   | 124.86  | 227.36   |
| 0.33 | 31666.14    | 71510.67    | 146369.36    | 339876.64    | 0.74 | 35.59   | 62.64   | 103.02  | 192.67   |
| 0.34 | 26614.03    | 59249.70    | 119878.49    | 272668.93    | 0.75 | 29.57   | 51.82   | 85.26   | 154.89   |
| 0.35 | 21980.81    | 48779.65    | 96551.82     | 223623.63    | 0.76 | 24.64   | 43.10   | 69.94   | 124.35   |
| 0.36 | 18228.61    | 40392.12    | 80189.43     | 183329.21    | 0.77 | 20.18   | 35.19   | 57.15   | 100.92   |
| 0.37 | 15076.34    | 33229.67    | 66727.51     | 153585.05    | 0.78 | 16.69   | 28.72   | 46.36   | 79.72    |
| 0.38 | 12462.14    | 27414.10    | 54903.41     | 127062.77    | 0.79 | 13.88   | 23.42   | 37.38   | 66.22    |
| 0.39 | 10392.54    | 22903.22    | 46137.86     | 100834.86    | 0.80 | 11.32   | 18.99   | 29.43   | 51.29    |
| 0.40 | 8883.91     | 19135.47    | 38409.52     | 83201.81     | 0.81 | 9.19    | 15.44   | 23.98   | 40.92    |
| 0.41 | 7467.26     | 15939.67    | 31626.10     | 69212.15     | 0.82 | 7.49    | 12.50   | 19.32   | 32.64    |
| 0.42 | 6270.91     | 13303.11    | 26370.49     | 57631.67     | 0.83 | 6.05    | 9.89    | 15.36   | 25.81    |
| 0.43 | 5307.21     | 11145.10    | 21812.93     | 47317.77     | 0.84 | 4.81    | 7.91    | 12.13   | 20.14    |
| 0.44 | 4439.02     | 9442.83     | 18525.96     | 40336.93     | 0.85 | 3.85    | 6.21    | 9.47    | 15.56    |
| 0.45 | 3781.55     | 8095.69     | 15529.67     | 33356.67     | 0.86 | 3.04    | 4.88    | 7.33    | 11.79    |
| 0.46 | 3188.17     | 6787.33     | 13175.90     | 29047.59     | 0.87 | 2.38    | 3.77    | 5.62    | 9.02     |
| 0.47 | 2689.99     | 5767.81     | 10799.09     | 23368.06     | 0.88 | 1.85    | 2.89    | 4.28    | 6.72     |
| 0.48 | 2305.79     | 4829.92     | 9206.99      | 19754.63     | 0.89 | 1.42    | 2.18    | 3.20    | 4.98     |
| 0.49 | 1967.31     | 4151.71     | 7855.96      | 16510.00     | 0.90 | 1.09    | 1.67    | 2.39    | 3.63     |
| 0.50 | 1678.57     | 3455.20     | 6566.73      | 14209.88     |      |         |         |         |          |

Table S428: Critical values for detector  $\hat{H}_{mov,sn}^{m,0.2}$  with windows size  $n = 0.2$ , and FM-OLS and D-OLS estimation in a model with intercept. The number of integrated regressors is 4 and the highest power of  $x_{kt}$  is 2.

| m    | 90 %         | 95 %         | 97,5 %        | 99 %          | m    | 90 %    | 95 %     | 97,5 %   | 99 %     |
|------|--------------|--------------|---------------|---------------|------|---------|----------|----------|----------|
| 0.10 | 181873231.95 | 470896737.10 | 1065793846.02 | 2566603459.28 | 0.51 | 7829.23 | 16539.83 | 33034.87 | 73465.96 |
| 0.11 | 109692963.00 | 284761519.64 | 635248403.93  | 1592076047.10 | 0.52 | 6658.44 | 14015.34 | 27829.45 | 62636.71 |
| 0.12 | 67745490.65  | 176891310.51 | 399465653.15  | 977842921.33  | 0.53 | 5684.57 | 11848.41 | 23292.52 | 51084.14 |
| 0.13 | 44343645.29  | 113014290.45 | 255067852.67  | 624144031.10  | 0.54 | 4826.97 | 9997.83  | 19481.20 | 42836.66 |
| 0.14 | 29535940.90  | 74631895.12  | 166223132.76  | 415007920.20  | 0.55 | 4119.57 | 8566.23  | 16604.53 | 35769.08 |
| 0.15 | 20113875.55  | 51091087.66  | 113728480.21  | 284474867.60  | 0.56 | 3519.36 | 7197.07  | 13994.27 | 29930.60 |
| 0.16 | 14160469.66  | 35369161.70  | 77956151.44   | 193372526.28  | 0.57 | 2987.03 | 6137.18  | 11688.57 | 25526.83 |
| 0.17 | 9916184.69   | 24979412.40  | 54437014.39   | 134413608.05  | 0.58 | 2567.58 | 5217.90  | 9911.87  | 21274.85 |
| 0.18 | 6952596.41   | 17859155.09  | 38585437.02   | 94570945.12   | 0.59 | 2203.72 | 4452.53  | 8399.86  | 17920.74 |
| 0.19 | 5123385.79   | 12611710.76  | 27221344.88   | 67673378.34   | 0.60 | 1887.44 | 3793.24  | 7144.93  | 15051.60 |
| 0.20 | 3840624.76   | 9477272.49   | 19962348.87   | 49772881.30   | 0.61 | 1624.67 | 3194.22  | 5974.53  | 12880.64 |
| 0.21 | 2888322.54   | 7060151.19   | 14978982.66   | 36951102.27   | 0.62 | 1387.79 | 2712.68  | 5037.63  | 10895.55 |
| 0.22 | 2190867.09   | 5272960.45   | 11458594.93   | 27091910.79   | 0.63 | 1177.86 | 2314.36  | 4247.05  | 9032.79  |
| 0.23 | 1671636.78   | 4113888.23   | 8890721.33    | 20491510.51   | 0.64 | 1008.88 | 1977.02  | 3546.41  | 7385.78  |
| 0.24 | 1316853.23   | 3194471.21   | 6984379.18    | 15886071.21   | 0.65 | 854.62  | 1646.83  | 3005.09  | 6204.91  |
| 0.25 | 1037291.56   | 2525492.64   | 5483903.39    | 12818066.67   | 0.66 | 726.72  | 1392.73  | 2524.97  | 5062.71  |
| 0.26 | 812107.56    | 1991878.78   | 4338276.21    | 10056655.14   | 0.67 | 617.76  | 1164.30  | 2077.74  | 4227.97  |
| 0.27 | 647568.26    | 1556653.72   | 3365360.26    | 7977097.03    | 0.68 | 520.53  | 977.19   | 1750.42  | 3548.99  |
| 0.28 | 510598.46    | 1226550.50   | 2624733.34    | 6065998.06    | 0.69 | 439.88  | 821.82   | 1483.64  | 2993.36  |
| 0.29 | 414183.37    | 974889.53    | 2102933.07    | 4810766.41    | 0.70 | 371.54  | 692.46   | 1255.30  | 2477.87  |
| 0.30 | 328475.52    | 774346.55    | 1667743.77    | 3891604.50    | 0.71 | 314.12  | 581.65   | 1033.35  | 2019.83  |
| 0.31 | 267216.42    | 624779.63    | 1353328.94    | 3155650.56    | 0.72 | 264.08  | 488.30   | 854.72   | 1702.88  |
| 0.32 | 218548.36    | 511259.15    | 1086377.63    | 2591952.07    | 0.73 | 221.14  | 406.61   | 701.15   | 1379.25  |
| 0.33 | 177741.17    | 419051.10    | 879749.31     | 2077806.38    | 0.74 | 185.26  | 337.43   | 580.02   | 1133.79  |
| 0.34 | 145982.52    | 340382.11    | 737131.62     | 1747033.47    | 0.75 | 154.19  | 279.72   | 473.27   | 922.79   |
| 0.35 | 121597.55    | 281299.87    | 611901.33     | 1432862.85    | 0.76 | 127.80  | 229.13   | 385.46   | 751.77   |
| 0.36 | 101264.38    | 231317.31    | 501124.41     | 1190343.75    | 0.77 | 105.55  | 186.87   | 314.76   | 586.55   |
| 0.37 | 84146.62     | 192130.91    | 404155.36     | 962430.88     | 0.78 | 86.75   | 151.41   | 252.86   | 468.87   |
| 0.38 | 70301.50     | 157671.60    | 333149.38     | 792585.15     | 0.79 | 71.07   | 123.48   | 201.08   | 374.07   |
| 0.39 | 58492.53     | 130264.63    | 273110.03     | 652156.87     | 0.80 | 58.11   | 99.55    | 160.96   | 296.79   |
| 0.40 | 49058.85     | 110179.92    | 228003.66     | 521704.47     | 0.81 | 47.36   | 80.43    | 129.67   | 237.29   |
| 0.41 | 41530.27     | 91966.95     | 187871.09     | 426448.43     | 0.82 | 38.29   | 64.96    | 102.96   | 186.81   |
| 0.42 | 34592.51     | 76424.04     | 153599.30     | 350200.09     | 0.83 | 30.84   | 52.04    | 81.55    | 142.78   |
| 0.43 | 28443.59     | 64071.59     | 127860.58     | 294287.94     | 0.84 | 25.00   | 41.19    | 63.28    | 109.75   |
| 0.44 | 24007.34     | 53110.38     | 107022.12     | 251098.30     | 0.85 | 19.98   | 32.41    | 49.14    | 83.34    |
| 0.45 | 20263.17     | 44666.37     | 89374.79      | 209491.45     | 0.86 | 15.79   | 25.29    | 38.04    | 64.02    |
| 0.46 | 17389.32     | 38264.35     | 76258.78      | 171987.12     | 0.87 | 12.35   | 19.52    | 29.23    | 48.50    |
| 0.47 | 14847.33     | 32423.70     | 64492.69      | 144400.57     | 0.88 | 9.57    | 15.04    | 22.25    | 35.94    |
| 0.48 | 12539.34     | 27571.41     | 54784.09      | 122053.46     | 0.89 | 7.39    | 11.37    | 16.46    | 26.68    |
| 0.49 | 10837.27     | 23316.21     | 46079.67      | 102714.91     | 0.90 | 5.59    | 8.51     | 12.32    | 19.45    |
| 0.50 | 9208.24      | 19714.94     | 39020.81      | 86221.55      |      |         |          |          |          |

Table S429: Critical values for detector  $\hat{H}_{mov,sn}^{m,0.2}$  with windows size  $n = 0.2$ , and IM-OLS estimation in a model with intercept. The number of integrated regressors is 4 and the highest power of  $x_{kt}$  is 2.

| m    | 90 %        | 95 %        | 97,5 %       | 99 %         | m    | 90 %    | 95 %    | 97,5 %  | 99 %     |
|------|-------------|-------------|--------------|--------------|------|---------|---------|---------|----------|
| 0.10 | 36290403.22 | 91518556.98 | 199730405.59 | 481511058.83 | 0.51 | 1586.47 | 3191.32 | 6079.52 | 12542.07 |
| 0.11 | 21724549.31 | 55002214.29 | 119183673.91 | 280886306.01 | 0.52 | 1364.87 | 2738.39 | 5092.67 | 10655.42 |
| 0.12 | 13503071.33 | 33595018.10 | 73545365.02  | 179066320.78 | 0.53 | 1153.18 | 2320.11 | 4223.61 | 8785.95  |
| 0.13 | 8967906.20  | 22623138.68 | 47601042.35  | 112148284.98 | 0.54 | 981.27  | 1961.88 | 3623.45 | 7433.90  |
| 0.14 | 5905079.78  | 14692994.35 | 31784668.94  | 74232665.55  | 0.55 | 835.79  | 1661.99 | 3024.71 | 6238.03  |
| 0.15 | 4063558.33  | 9914264.64  | 21466573.78  | 51090246.78  | 0.56 | 713.48  | 1413.74 | 2572.27 | 5191.35  |
| 0.16 | 2778197.06  | 6880761.99  | 14874760.16  | 34672686.82  | 0.57 | 616.44  | 1201.50 | 2140.40 | 4310.11  |
| 0.17 | 2001287.53  | 4882360.40  | 10392173.87  | 24085460.97  | 0.58 | 511.87  | 1005.45 | 1815.91 | 3743.81  |
| 0.18 | 1437814.73  | 3473306.84  | 7614130.16   | 17870922.58  | 0.59 | 435.16  | 855.33  | 1535.89 | 3141.21  |
| 0.19 | 1056557.94  | 2490814.78  | 5435823.02   | 13087393.67  | 0.60 | 371.66  | 718.29  | 1297.62 | 2625.89  |
| 0.20 | 780104.07   | 1846574.02  | 4035645.70   | 9357227.77   | 0.61 | 319.58  | 607.58  | 1098.95 | 2205.93  |
| 0.21 | 599194.18   | 1417432.15  | 3042995.63   | 6984670.85   | 0.62 | 271.02  | 514.83  | 920.00  | 1866.12  |
| 0.22 | 452649.58   | 1069950.69  | 2269041.77   | 5228704.31   | 0.63 | 232.14  | 438.88  | 758.11  | 1506.76  |
| 0.23 | 346295.13   | 823867.44   | 1737581.48   | 4038696.66   | 0.64 | 195.97  | 364.85  | 641.08  | 1265.36  |
| 0.24 | 267562.00   | 629985.46   | 1329519.37   | 3107129.44   | 0.65 | 167.29  | 309.58  | 550.23  | 1073.43  |
| 0.25 | 209515.46   | 485730.07   | 1034951.52   | 2374851.83   | 0.66 | 141.36  | 259.21  | 461.98  | 894.66   |
| 0.26 | 166331.89   | 379837.93   | 793969.95    | 1890076.40   | 0.67 | 118.63  | 218.24  | 381.69  | 751.77   |
| 0.27 | 130002.75   | 300545.85   | 630839.52    | 1476638.88   | 0.68 | 100.47  | 184.27  | 315.76  | 623.84   |
| 0.28 | 104641.70   | 238303.13   | 494636.84    | 1139395.27   | 0.69 | 84.82   | 155.99  | 266.30  | 511.11   |
| 0.29 | 84501.66    | 186269.65   | 397861.65    | 931854.70    | 0.70 | 71.48   | 129.97  | 220.13  | 426.98   |
| 0.30 | 67765.67    | 152989.67   | 317241.25    | 748471.03    | 0.71 | 60.44   | 108.55  | 183.83  | 347.03   |
| 0.31 | 55101.16    | 123602.54   | 259622.90    | 606407.66    | 0.72 | 51.07   | 90.83   | 151.76  | 285.15   |
| 0.32 | 45342.68    | 101283.78   | 211762.28    | 495249.37    | 0.73 | 42.52   | 76.05   | 125.72  | 228.93   |
| 0.33 | 36682.72    | 82574.41    | 168247.47    | 388084.81    | 0.74 | 35.98   | 63.14   | 103.68  | 193.34   |
| 0.34 | 30800.13    | 68164.73    | 137758.32    | 316961.11    | 0.75 | 29.80   | 52.14   | 85.61   | 155.09   |
| 0.35 | 25357.31    | 55906.04    | 110339.16    | 258625.67    | 0.76 | 24.81   | 43.30   | 70.16   | 124.64   |
| 0.36 | 21061.13    | 46470.59    | 91761.69     | 209092.41    | 0.77 | 20.30   | 35.31   | 57.29   | 101.13   |
| 0.37 | 17365.05    | 38214.98    | 76459.67     | 173660.92    | 0.78 | 16.78   | 28.80   | 46.46   | 79.81    |
| 0.38 | 14303.68    | 31393.02    | 62683.99     | 143937.16    | 0.79 | 13.96   | 23.51   | 37.47   | 66.28    |
| 0.39 | 11961.25    | 26233.59    | 52304.10     | 114625.52    | 0.80 | 11.41   | 19.09   | 29.52   | 51.38    |
| 0.40 | 10147.75    | 21827.59    | 43324.47     | 94160.36     | 0.81 | 9.30    | 15.55   | 24.11   | 41.06    |
| 0.41 | 8539.29     | 18099.45    | 35547.90     | 78530.27     | 0.82 | 7.61    | 12.60   | 19.42   | 32.73    |
| 0.42 | 7157.49     | 15045.58    | 29905.19     | 64504.25     | 0.83 | 6.16    | 9.99    | 15.48   | 25.89    |
| 0.43 | 6038.49     | 12620.05    | 24439.74     | 52837.74     | 0.84 | 4.93    | 8.02    | 12.22   | 20.20    |
| 0.44 | 5070.24     | 10611.97    | 20713.66     | 44957.91     | 0.85 | 3.97    | 6.33    | 9.58    | 15.68    |
| 0.45 | 4290.27     | 9086.46     | 17350.38     | 37439.51     | 0.86 | 3.16    | 4.99    | 7.45    | 11.90    |
| 0.46 | 3598.48     | 7591.65     | 14539.80     | 32253.93     | 0.87 | 2.50    | 3.89    | 5.73    | 9.17     |
| 0.47 | 3032.04     | 6417.60     | 12030.55     | 25834.89     | 0.88 | 1.97    | 3.01    | 4.41    | 6.83     |
| 0.48 | 2578.87     | 5362.60     | 10115.74     | 21714.98     | 0.89 | 1.55    | 2.31    | 3.31    | 5.10     |
| 0.49 | 2198.63     | 4623.51     | 8728.10      | 18382.90     | 0.90 | 1.22    | 1.79    | 2.51    | 3.75     |
| 0.50 | 1872.47     | 3808.06     | 7216.72      | 15451.04     |      |         |         |         |          |

Table S430: Critical values for detector  $\hat{H}_{mov,sn}^{m,0.3}$  with windows size  $n = 0.3$ , and FM-OLS and D-OLS estimation in a model with intercept. The number of integrated regressors is 4 and the highest power of  $x_{kt}$  is 2.

| m    | 90 %         | 95 %         | 97,5 %        | 99 %          | m    | 90 %    | 95 %     | 97,5 %   | 99 %     |
|------|--------------|--------------|---------------|---------------|------|---------|----------|----------|----------|
| 0.10 | 214741206.42 | 558402437.42 | 1271005058.27 | 3049388279.90 | 0.51 | 8692.74 | 18089.29 | 36060.39 | 80302.13 |
| 0.11 | 130037644.65 | 336115695.54 | 751525896.57  | 1916947332.27 | 0.52 | 7362.59 | 15385.93 | 30341.27 | 67796.18 |
| 0.12 | 80035809.77  | 209187400.36 | 472980493.79  | 1156858962.46 | 0.53 | 6252.23 | 12966.87 | 25286.03 | 55303.61 |
| 0.13 | 52205925.51  | 133852833.82 | 304213665.48  | 741252654.71  | 0.54 | 5292.25 | 10933.61 | 21024.97 | 45698.95 |
| 0.14 | 34938573.65  | 87942858.05  | 196806328.26  | 496061109.90  | 0.55 | 4492.03 | 9339.08  | 17787.60 | 38483.96 |
| 0.15 | 23736703.55  | 60557107.34  | 134140622.71  | 339312971.22  | 0.56 | 3833.16 | 7790.17  | 14992.24 | 32138.35 |
| 0.16 | 16710356.19  | 41680494.21  | 92296371.89   | 228965121.24  | 0.57 | 3233.66 | 6624.73  | 12485.93 | 27379.22 |
| 0.17 | 11660744.10  | 29383592.81  | 64611859.13   | 158683086.25  | 0.58 | 2766.77 | 5567.29  | 10502.58 | 22402.35 |
| 0.18 | 8233965.70   | 20990670.25  | 45722038.18   | 113083994.14  | 0.59 | 2369.63 | 4752.13  | 8890.85  | 18904.82 |
| 0.19 | 6062970.61   | 14875164.28  | 32141466.25   | 80474060.91   | 0.60 | 2024.09 | 4016.53  | 7536.65  | 15786.29 |
| 0.20 | 4526574.30   | 11091060.56  | 23492062.03   | 57833374.87   | 0.61 | 1732.79 | 3388.10  | 6303.95  | 13485.55 |
| 0.21 | 3388122.99   | 8268974.57   | 17561230.00   | 43594311.98   | 0.62 | 1469.95 | 2855.59  | 5291.42  | 11321.33 |
| 0.22 | 2563185.69   | 6165049.31   | 13480533.65   | 31883984.54   | 0.63 | 1246.97 | 2421.33  | 4465.51  | 9439.37  |
| 0.23 | 1960657.14   | 4819033.14   | 10462510.60   | 24188128.24   | 0.64 | 1063.78 | 2065.21  | 3689.77  | 7659.84  |
| 0.24 | 1545028.37   | 3747578.89   | 8169886.62    | 18698971.12   | 0.65 | 897.34  | 1719.84  | 3116.13  | 6394.30  |
| 0.25 | 1218677.21   | 2964835.39   | 6388591.15    | 14896635.60   | 0.66 | 757.51  | 1442.38  | 2602.11  | 5183.82  |
| 0.26 | 952739.38    | 2334773.53   | 5115756.04    | 11694497.00   | 0.67 | 640.52  | 1200.47  | 2134.70  | 4322.82  |
| 0.27 | 757264.76    | 1810709.60   | 3896862.31    | 9344697.22    | 0.68 | 536.41  | 1002.96  | 1791.56  | 3635.44  |
| 0.28 | 595880.54    | 1426594.13   | 3067724.39    | 7144424.52    | 0.69 | 453.63  | 841.76   | 1509.02  | 3050.29  |
| 0.29 | 481883.90    | 1131602.88   | 2428714.12    | 5591727.32    | 0.70 | 381.69  | 706.65   | 1274.21  | 2511.03  |
| 0.30 | 382726.09    | 905697.61    | 1927582.32    | 4530502.19    | 0.71 | 320.55  | 591.31   | 1049.49  | 2046.94  |
| 0.31 | 311722.03    | 727417.50    | 1563447.71    | 3621262.28    | 0.72 | 268.62  | 495.66   | 865.50   | 1715.22  |
| 0.32 | 254301.02    | 589676.92    | 1254444.92    | 2975785.47    | 0.73 | 224.14  | 411.45   | 708.44   | 1389.45  |
| 0.33 | 205695.76    | 485769.32    | 1019716.83    | 2403716.82    | 0.74 | 187.23  | 340.69   | 582.95   | 1141.54  |
| 0.34 | 169005.89    | 390614.38    | 842715.34     | 2010828.78    | 0.75 | 155.62  | 281.80   | 475.14   | 926.70   |
| 0.35 | 140463.18    | 322524.26    | 699044.86     | 1650706.01    | 0.76 | 128.64  | 229.98   | 386.68   | 753.80   |
| 0.36 | 116595.76    | 265902.17    | 573095.40     | 1348705.61    | 0.77 | 106.05  | 187.45   | 315.44   | 587.36   |
| 0.37 | 96543.97     | 220144.43    | 463196.67     | 1092847.01    | 0.78 | 87.02   | 151.67   | 253.20   | 469.10   |
| 0.38 | 80587.02     | 180445.13    | 379126.90     | 900935.29     | 0.79 | 71.24   | 123.61   | 201.33   | 374.18   |
| 0.39 | 66887.04     | 148139.15    | 308876.69     | 740494.01     | 0.80 | 58.22   | 99.66    | 161.06   | 296.99   |
| 0.40 | 56334.11     | 125899.33    | 257535.27     | 588460.89     | 0.81 | 47.46   | 80.56    | 129.81   | 237.41   |
| 0.41 | 47487.20     | 104018.53    | 211866.13     | 475878.18     | 0.82 | 38.38   | 65.04    | 103.06   | 186.95   |
| 0.42 | 39498.86     | 86203.32     | 172592.92     | 392963.42     | 0.83 | 30.96   | 52.14    | 81.67    | 142.90   |
| 0.43 | 32335.44     | 72395.48     | 144017.91     | 328553.58     | 0.84 | 25.13   | 41.29    | 63.40    | 109.83   |
| 0.44 | 27212.53     | 59786.12     | 119916.04     | 280527.13     | 0.85 | 20.10   | 32.51    | 49.24    | 83.45    |
| 0.45 | 22946.94     | 50133.27     | 99193.03      | 232419.21     | 0.86 | 15.91   | 25.38    | 38.17    | 64.10    |
| 0.46 | 19491.24     | 42752.51     | 84721.76      | 191396.61     | 0.87 | 12.46   | 19.65    | 29.35    | 48.61    |
| 0.47 | 16706.03     | 36005.48     | 71466.95      | 158067.93     | 0.88 | 9.68    | 15.14    | 22.35    | 36.07    |
| 0.48 | 14108.77     | 30648.07     | 60385.31      | 132466.04     | 0.89 | 7.51    | 11.48    | 16.56    | 26.77    |
| 0.49 | 12092.43     | 25786.00     | 50518.12      | 113425.64     | 0.90 | 5.70    | 8.62     | 12.42    | 19.58    |
| 0.50 | 10232.89     | 21928.94     | 42782.92      | 93474.86      |      |         |          |          |          |

Table S431: Critical values for detector  $\hat{H}_{mov,sn}^{m,0.3}$  with windows size  $n = 0.3$ , and IM-OLS estimation in a model with intercept. The number of integrated regressors is 4 and the highest power of  $x_{kt}$  is 2.



| m    | 90 %        | 95 %         | 97,5 %       | 99 %         | m    | 90 %    | 95 %    | 97,5 %  | 99 %     |
|------|-------------|--------------|--------------|--------------|------|---------|---------|---------|----------|
| 0.10 | 89409561.10 | 170542222.07 | 313770245.59 | 662583343.49 | 0.51 | 2424.25 | 4337.07 | 7203.81 | 13880.65 |
| 0.11 | 52445501.45 | 99971751.11  | 176896357.83 | 362947765.94 | 0.52 | 2073.99 | 3699.49 | 6126.35 | 11766.66 |
| 0.12 | 31259589.46 | 60177258.46  | 108692066.10 | 224667146.54 | 0.53 | 1756.05 | 3111.77 | 5246.33 | 9825.62  |
| 0.13 | 19841605.20 | 37472810.98  | 68018751.76  | 137111140.83 | 0.54 | 1504.56 | 2660.62 | 4446.21 | 8179.60  |
| 0.14 | 12798308.49 | 24062836.97  | 43447855.16  | 87971755.10  | 0.55 | 1282.57 | 2288.83 | 3746.25 | 6869.09  |
| 0.15 | 8525176.26  | 16219411.61  | 28941434.02  | 59623185.89  | 0.56 | 1100.29 | 1944.12 | 3195.12 | 5900.88  |
| 0.16 | 5796625.26  | 10976415.41  | 19877633.62  | 40347878.01  | 0.57 | 937.23  | 1642.96 | 2702.06 | 4935.47  |
| 0.17 | 4006588.66  | 7551513.31   | 13698100.55  | 27460977.78  | 0.58 | 793.08  | 1407.04 | 2323.20 | 4331.31  |
| 0.18 | 2837072.94  | 5417937.39   | 9698760.71   | 19810514.01  | 0.59 | 672.29  | 1206.32 | 1959.65 | 3530.83  |
| 0.19 | 2055272.66  | 3853366.74   | 6901012.11   | 14193581.52  | 0.60 | 577.19  | 1026.18 | 1673.86 | 3059.77  |
| 0.20 | 1512350.86  | 2804644.92   | 5053565.85   | 10161430.05  | 0.61 | 489.76  | 869.48  | 1429.03 | 2611.20  |
| 0.21 | 1125649.55  | 2103885.64   | 3773493.96   | 7534117.29   | 0.62 | 419.66  | 743.23  | 1218.87 | 2249.80  |
| 0.22 | 829509.23   | 1582945.59   | 2765964.16   | 5728789.19   | 0.63 | 358.42  | 628.78  | 1014.41 | 1838.48  |
| 0.23 | 633785.30   | 1190336.27   | 2092680.67   | 4245765.87   | 0.64 | 302.49  | 531.41  | 851.91  | 1546.19  |
| 0.24 | 486321.71   | 894660.02    | 1590508.00   | 3226537.23   | 0.65 | 256.62  | 448.13  | 730.45  | 1315.62  |
| 0.25 | 372928.92   | 688468.95    | 1228261.62   | 2505946.95   | 0.66 | 220.51  | 380.92  | 625.18  | 1120.55  |
| 0.26 | 287370.41   | 530721.48    | 929304.92    | 1971819.86   | 0.67 | 187.44  | 323.85  | 527.18  | 944.20   |
| 0.27 | 223150.42   | 418021.92    | 732522.40    | 1511924.30   | 0.68 | 158.69  | 274.04  | 442.86  | 799.49   |
| 0.28 | 178394.41   | 331204.68    | 576266.19    | 1166401.56   | 0.69 | 135.42  | 232.93  | 373.96  | 659.46   |
| 0.29 | 142167.50   | 261329.86    | 462970.67    | 937935.28    | 0.70 | 114.53  | 195.86  | 317.32  | 556.78   |
| 0.30 | 113458.84   | 210335.20    | 372653.19    | 757480.41    | 0.71 | 96.49   | 163.73  | 264.11  | 463.63   |
| 0.31 | 91379.74    | 171160.08    | 298762.02    | 600022.60    | 0.72 | 81.32   | 137.76  | 221.64  | 379.81   |
| 0.32 | 74117.45    | 137427.90    | 240976.46    | 492118.49    | 0.73 | 69.07   | 115.64  | 183.66  | 315.69   |
| 0.33 | 60273.64    | 111813.09    | 195150.96    | 395936.25    | 0.74 | 58.23   | 97.11   | 151.15  | 262.49   |
| 0.34 | 49216.68    | 91021.12     | 160452.89    | 321121.71    | 0.75 | 48.29   | 80.51   | 125.35  | 216.79   |
| 0.35 | 40288.31    | 74503.21     | 128769.64    | 261898.33    | 0.76 | 40.50   | 67.25   | 104.04  | 177.15   |
| 0.36 | 33183.90    | 60643.84     | 105531.44    | 214775.39    | 0.77 | 33.38   | 54.99   | 84.70   | 144.32   |
| 0.37 | 27420.53    | 50089.10     | 88209.76     | 173303.82    | 0.78 | 27.65   | 45.29   | 69.66   | 116.02   |
| 0.38 | 22586.28    | 41329.88     | 71431.19     | 144915.66    | 0.79 | 23.07   | 37.71   | 58.46   | 96.59    |
| 0.39 | 19049.88    | 34188.39     | 59185.82     | 119412.53    | 0.80 | 18.69   | 30.37   | 46.12   | 75.98    |
| 0.40 | 15728.26    | 28478.30     | 48834.47     | 96525.02     | 0.81 | 15.21   | 24.79   | 37.66   | 61.70    |
| 0.41 | 13211.51    | 23566.59     | 40191.39     | 78500.06     | 0.82 | 12.50   | 20.29   | 30.53   | 49.88    |
| 0.42 | 10980.49    | 19883.65     | 33393.91     | 65205.38     | 0.83 | 9.97    | 16.20   | 24.57   | 39.09    |
| 0.43 | 9196.87     | 16672.52     | 28009.44     | 54854.89     | 0.84 | 8.01    | 12.87   | 19.05   | 30.47    |
| 0.44 | 7730.72     | 14010.94     | 23872.62     | 45769.07     | 0.85 | 6.31    | 10.13   | 14.97   | 23.56    |
| 0.45 | 6596.84     | 11850.53     | 20160.62     | 38170.62     | 0.86 | 4.99    | 7.84    | 11.46   | 17.93    |
| 0.46 | 5558.01     | 10031.68     | 17268.70     | 32927.12     | 0.87 | 3.84    | 6.03    | 8.78    | 13.67    |
| 0.47 | 4701.88     | 8459.49      | 14359.38     | 27849.02     | 0.88 | 2.93    | 4.54    | 6.63    | 10.12    |
| 0.48 | 3978.90     | 7118.33      | 12253.64     | 23527.99     | 0.89 | 2.19    | 3.38    | 4.84    | 7.53     |
| 0.49 | 3391.56     | 6057.99      | 10160.52     | 19609.85     | 0.90 | 1.61    | 2.49    | 3.56    | 5.35     |
| 0.50 | 2875.08     | 5128.77      | 8594.03      | 16481.57     |      |         |         |         |          |

Table S432: Critical values for detector  $\hat{H}_{mov,sn}^{m,0.1}$  with windows size  $n = 0.1$ , and FM-OLS and D-OLS estimation in a model with intercept and linear trend. The number of integrated regressors is 4 and the highest power of  $x_{kt}$  is 2.

| m    | 90 %         | 95 %         | 97,5 %        | 99 %          | m    | 90 %     | 95 %     | 97,5 %   | 99 %     |
|------|--------------|--------------|---------------|---------------|------|----------|----------|----------|----------|
| 0.10 | 401838926.49 | 808763484.25 | 1539102389.63 | 3382881711.96 | 0.51 | 10500.70 | 19337.03 | 33591.72 | 67049.16 |
| 0.11 | 235268288.93 | 461629985.94 | 872837776.55  | 1980073275.05 | 0.52 | 8857.20  | 16307.02 | 28273.26 | 56600.94 |
| 0.12 | 140345680.06 | 280713343.43 | 537625140.00  | 1162578739.78 | 0.53 | 7537.56  | 13902.09 | 23763.19 | 47845.06 |
| 0.13 | 88160553.78  | 176472410.60 | 327256187.50  | 722540781.46  | 0.54 | 6452.14  | 11620.80 | 20199.06 | 40071.04 |
| 0.14 | 56557032.94  | 112092282.76 | 213890452.16  | 461424923.97  | 0.55 | 5506.27  | 10023.97 | 17109.47 | 33392.92 |
| 0.15 | 37760799.06  | 75551050.59  | 142307859.59  | 300252198.87  | 0.56 | 4721.62  | 8521.77  | 14505.80 | 28789.18 |
| 0.16 | 25664342.66  | 50698367.18  | 95235572.32   | 208003598.01  | 0.57 | 4008.80  | 7205.49  | 12301.92 | 24197.68 |
| 0.17 | 17889783.34  | 35176042.90  | 65210124.98   | 142798565.37  | 0.58 | 3375.02  | 6164.81  | 10510.37 | 20691.82 |
| 0.18 | 12503322.00  | 24636735.39  | 45089038.83   | 99481524.70   | 0.59 | 2889.46  | 5188.77  | 8874.05  | 17350.89 |
| 0.19 | 8925423.21   | 17359185.81  | 32421002.70   | 70863015.02   | 0.60 | 2459.79  | 4433.19  | 7486.15  | 14390.09 |
| 0.20 | 6519558.34   | 12643710.66  | 23367021.54   | 49511784.86   | 0.61 | 2089.33  | 3717.27  | 6376.07  | 12408.15 |
| 0.21 | 4834917.15   | 9301027.11   | 17266734.39   | 36322864.96   | 0.62 | 1784.91  | 3153.89  | 5341.54  | 10401.48 |
| 0.22 | 3625010.01   | 6981232.14   | 12622880.76   | 26506373.88   | 0.63 | 1530.34  | 2681.83  | 4513.56  | 8711.56  |
| 0.23 | 2737449.30   | 5312966.13   | 9554713.22    | 20138012.29   | 0.64 | 1307.25  | 2278.01  | 3787.49  | 7236.86  |
| 0.24 | 2113721.15   | 4062085.77   | 7356554.12    | 15256713.00   | 0.65 | 1115.39  | 1945.56  | 3195.53  | 6119.95  |
| 0.25 | 1637593.83   | 3155014.15   | 5738813.79    | 12113625.60   | 0.66 | 941.65   | 1665.75  | 2677.43  | 5026.76  |
| 0.26 | 1268815.74   | 2421199.11   | 4487080.49    | 9399734.23    | 0.67 | 804.60   | 1396.28  | 2262.42  | 4289.37  |
| 0.27 | 990856.78    | 1899509.93   | 3454100.15    | 7342105.52    | 0.68 | 678.94   | 1180.76  | 1911.41  | 3570.29  |
| 0.28 | 783953.21    | 1471775.83   | 2744263.01    | 5815778.00    | 0.69 | 577.10   | 996.47   | 1615.22  | 3011.85  |
| 0.29 | 623137.86    | 1178565.05   | 2163121.62    | 4629277.35    | 0.70 | 490.63   | 845.16   | 1374.68  | 2506.00  |
| 0.30 | 499634.50    | 940857.91    | 1727897.17    | 3672542.21    | 0.71 | 411.25   | 713.34   | 1160.64  | 2086.98  |
| 0.31 | 400214.82    | 768121.44    | 1393280.62    | 2964951.48    | 0.72 | 348.68   | 599.00   | 966.35   | 1762.51  |
| 0.32 | 321737.42    | 616595.42    | 1123044.77    | 2411413.17    | 0.73 | 290.82   | 502.34   | 808.76   | 1473.09  |
| 0.33 | 261724.24    | 499482.76    | 917482.56     | 1942271.83    | 0.74 | 243.75   | 421.29   | 674.13   | 1206.95  |
| 0.34 | 213546.29    | 407005.24    | 746483.14     | 1579685.64    | 0.75 | 206.08   | 346.69   | 553.23   | 997.34   |
| 0.35 | 175823.55    | 331807.92    | 613854.12     | 1277842.47    | 0.76 | 171.53   | 288.16   | 459.19   | 819.99   |
| 0.36 | 143613.77    | 275423.01    | 507862.63     | 1031089.70    | 0.77 | 141.47   | 238.38   | 378.80   | 668.39   |
| 0.37 | 118849.61    | 225633.65    | 411851.92     | 859949.55     | 0.78 | 116.89   | 196.57   | 307.53   | 540.83   |
| 0.38 | 98545.04     | 183836.12    | 337635.82     | 705405.31     | 0.79 | 96.44    | 160.33   | 250.85   | 438.83   |
| 0.39 | 81300.15     | 151713.68    | 273037.73     | 581468.89     | 0.80 | 79.52    | 130.96   | 204.59   | 349.97   |
| 0.40 | 67760.68     | 125881.75    | 225717.36     | 474186.75     | 0.81 | 64.94    | 106.64   | 165.06   | 280.63   |
| 0.41 | 56900.71     | 105052.59    | 186126.68     | 395176.95     | 0.82 | 53.03    | 86.25    | 132.10   | 222.11   |
| 0.42 | 47647.40     | 87565.06     | 154721.27     | 321022.16     | 0.83 | 42.53    | 69.20    | 104.39   | 175.37   |
| 0.43 | 40035.20     | 73128.26     | 130999.75     | 265448.57     | 0.84 | 34.07    | 54.84    | 82.31    | 135.00   |
| 0.44 | 33483.55     | 61032.86     | 109422.78     | 226212.04     | 0.85 | 27.13    | 43.12    | 64.02    | 103.42   |
| 0.45 | 28285.71     | 51609.97     | 91893.27      | 192278.12     | 0.86 | 21.27    | 33.39    | 49.85    | 80.17    |
| 0.46 | 23981.28     | 44352.50     | 78357.58      | 160674.22     | 0.87 | 16.64    | 25.91    | 38.05    | 60.97    |
| 0.47 | 20426.24     | 37764.40     | 65654.73      | 132744.26     | 0.88 | 12.88    | 19.78    | 28.59    | 45.45    |
| 0.48 | 17357.52     | 31780.20     | 55434.58      | 112724.69     | 0.89 | 9.72     | 14.74    | 21.31    | 32.67    |
| 0.49 | 14689.63     | 26809.94     | 45967.88      | 93566.46      | 0.90 | 7.23     | 11.00    | 15.66    | 23.86    |
| 0.50 | 12419.81     | 22653.58     | 39508.86      | 78724.39      |      |          |          |          |          |

Table S433: Critical values for detector  $\hat{H}_{mov,sn}^{m,0.1}$  with windows size  $n = 0.1$ , and IM-OLS estimation in a model with intercept and linear trend. The number of integrated regressors is 4 and the highest power of  $x_{kt}$  is 2.

| m    | 90 %         | 95 %         | 97,5 %       | 99 %         | m    | 90 %    | 95 %    | 97,5 %   | 99 %     |
|------|--------------|--------------|--------------|--------------|------|---------|---------|----------|----------|
| 0.10 | 120841829.09 | 228360613.47 | 419857077.11 | 888787213.34 | 0.51 | 3417.08 | 6105.62 | 10170.96 | 19147.96 |
| 0.11 | 71301647.51  | 135920058.37 | 239582189.54 | 493688752.81 | 0.52 | 2906.36 | 5155.49 | 8511.91  | 16236.20 |
| 0.12 | 43102817.65  | 82754827.12  | 150136255.62 | 309125871.77 | 0.53 | 2463.51 | 4320.93 | 7237.08  | 13602.10 |
| 0.13 | 27464113.75  | 51830243.39  | 94221748.08  | 193255455.94 | 0.54 | 2092.16 | 3700.01 | 6104.75  | 11152.36 |
| 0.14 | 17817685.99  | 33791793.98  | 60787758.59  | 122660367.81 | 0.55 | 1783.15 | 3158.66 | 5139.71  | 9433.80  |
| 0.15 | 12020375.74  | 22679108.55  | 40566272.61  | 84075362.24  | 0.56 | 1519.49 | 2659.97 | 4365.28  | 8039.40  |
| 0.16 | 8234420.95   | 15598905.68  | 27902681.73  | 57608491.25  | 0.57 | 1284.50 | 2238.63 | 3642.63  | 6687.57  |
| 0.17 | 5697547.91   | 10796770.46  | 19583854.38  | 38773085.88  | 0.58 | 1084.68 | 1912.12 | 3166.25  | 5785.78  |
| 0.18 | 4064963.71   | 7790751.69   | 13897035.92  | 28008382.44  | 0.59 | 916.17  | 1629.94 | 2632.34  | 4782.07  |
| 0.19 | 2949405.71   | 5553908.36   | 9856457.64   | 20351958.92  | 0.60 | 782.50  | 1367.95 | 2242.64  | 4027.73  |
| 0.20 | 2182071.82   | 4040816.98   | 7291277.91   | 14724965.74  | 0.61 | 658.11  | 1158.31 | 1903.54  | 3420.81  |
| 0.21 | 1630780.18   | 3059888.69   | 5446383.92   | 10883371.72  | 0.62 | 560.08  | 987.11  | 1600.36  | 2896.16  |
| 0.22 | 1205393.43   | 2291093.58   | 4040014.72   | 8219502.47   | 0.63 | 476.93  | 822.99  | 1326.22  | 2407.93  |
| 0.23 | 919782.45    | 1728063.03   | 3039665.66   | 6181368.17   | 0.64 | 398.73  | 695.55  | 1106.17  | 1983.29  |
| 0.24 | 709510.11    | 1303171.60   | 2308394.24   | 4736044.75   | 0.65 | 335.29  | 580.48  | 940.19   | 1675.15  |
| 0.25 | 546484.33    | 1005568.36   | 1787930.52   | 3643487.18   | 0.66 | 286.28  | 490.88  | 794.70   | 1426.22  |
| 0.26 | 421421.51    | 774255.73    | 1368184.68   | 2858558.35   | 0.67 | 240.49  | 412.98  | 669.27   | 1182.56  |
| 0.27 | 327718.30    | 613901.53    | 1072697.41   | 2183582.91   | 0.68 | 202.35  | 348.44  | 554.15   | 1006.51  |
| 0.28 | 262063.21    | 485492.09    | 841516.77    | 1704127.55   | 0.69 | 170.41  | 292.53  | 463.21   | 808.95   |
| 0.29 | 208689.91    | 384609.26    | 677068.85    | 1368111.47   | 0.70 | 142.75  | 242.70  | 388.21   | 681.65   |
| 0.30 | 166561.06    | 309766.19    | 547976.24    | 1100081.59   | 0.71 | 119.12  | 201.44  | 321.00   | 564.03   |
| 0.31 | 133778.89    | 250955.71    | 435562.96    | 887986.49    | 0.72 | 99.59   | 168.28  | 266.43   | 452.69   |
| 0.32 | 108739.95    | 202845.97    | 356173.24    | 724026.89    | 0.73 | 83.68   | 139.46  | 218.35   | 371.11   |
| 0.33 | 88644.83     | 164013.46    | 286643.31    | 575424.91    | 0.74 | 69.99   | 116.06  | 179.14   | 305.49   |
| 0.34 | 72355.87     | 134086.60    | 234819.70    | 466459.47    | 0.75 | 57.45   | 95.12   | 146.26   | 248.28   |
| 0.35 | 59160.25     | 108961.45    | 188931.22    | 379776.24    | 0.76 | 47.47   | 78.33   | 120.14   | 201.35   |
| 0.36 | 48680.34     | 88342.73     | 154679.30    | 310561.11    | 0.77 | 38.53   | 63.22   | 96.52    | 162.89   |
| 0.37 | 40085.08     | 73045.23     | 128238.03    | 249626.00    | 0.78 | 31.59   | 51.29   | 78.45    | 129.11   |
| 0.38 | 33018.97     | 60542.47     | 103847.24    | 208166.52    | 0.79 | 25.88   | 42.29   | 64.45    | 106.65   |
| 0.39 | 27860.31     | 49973.01     | 85863.88     | 172956.27    | 0.80 | 20.74   | 33.44   | 50.58    | 82.81    |
| 0.40 | 22923.20     | 41306.82     | 70400.45     | 139838.33    | 0.81 | 16.62   | 26.90   | 40.77    | 66.02    |
| 0.41 | 19218.26     | 34156.26     | 58447.81     | 114465.18    | 0.82 | 13.44   | 21.74   | 32.51    | 52.85    |
| 0.42 | 15935.72     | 28818.23     | 48036.14     | 92848.94     | 0.83 | 10.63   | 17.15   | 25.91    | 40.96    |
| 0.43 | 13340.58     | 23907.91     | 40562.60     | 77738.68     | 0.84 | 8.45    | 13.48   | 19.90    | 31.61    |
| 0.44 | 11152.48     | 20203.62     | 34178.50     | 66004.87     | 0.85 | 6.58    | 10.50   | 15.43    | 24.21    |
| 0.45 | 9459.49      | 17019.80     | 28988.75     | 54238.40     | 0.86 | 5.16    | 8.09    | 11.77    | 18.31    |
| 0.46 | 7955.41      | 14408.29     | 24622.84     | 47417.39     | 0.87 | 3.96    | 6.17    | 8.96     | 13.86    |
| 0.47 | 6714.77      | 12155.27     | 20472.31     | 39437.10     | 0.88 | 3.01    | 4.65    | 6.72     | 10.23    |
| 0.48 | 5661.92      | 10175.99     | 17286.97     | 32786.66     | 0.89 | 2.28    | 3.46    | 4.94     | 7.63     |
| 0.49 | 4830.43      | 8584.08      | 14269.09     | 27439.98     | 0.90 | 1.71    | 2.58    | 3.65     | 5.44     |
| 0.50 | 4056.27      | 7239.86      | 12160.85     | 22794.17     |      |         |         |          |          |

Table S434: Critical values for detector  $\hat{H}_{mov,sn}^{m,0.2}$  with windows size  $n = 0.2$ , and FM-OLS and D-OLS estimation in a model with intercept and linear trend. The number of integrated regressors is 4 and the highest power of  $x_{kt}$  is 2.

| m    | 90 %         | 95 %          | 97,5 %        | 99 %          | m    | 90 %     | 95 %     | 97,5 %   | 99 %     |
|------|--------------|---------------|---------------|---------------|------|----------|----------|----------|----------|
| 0.10 | 538532284.27 | 1090015803.52 | 2066239100.03 | 4523044722.79 | 0.51 | 14829.46 | 27043.99 | 46588.87 | 93645.25 |
| 0.11 | 319595183.33 | 626633420.50  | 1182395613.68 | 2716434185.26 | 0.52 | 12435.33 | 22862.02 | 39584.42 | 79091.69 |
| 0.12 | 191878791.32 | 385546754.59  | 735616139.10  | 1611329337.60 | 0.53 | 10563.08 | 19405.36 | 32955.27 | 65477.45 |
| 0.13 | 121516433.64 | 241937216.09  | 449048867.04  | 997648468.62  | 0.54 | 8986.27  | 16121.28 | 27616.54 | 54762.09 |
| 0.14 | 78994113.58  | 155327287.99  | 298144365.02  | 638603796.83  | 0.55 | 7609.40  | 13801.11 | 23219.88 | 45107.93 |
| 0.15 | 53062959.75  | 105730145.26  | 198302255.03  | 423995213.90  | 0.56 | 6517.89  | 11661.23 | 19682.49 | 38696.09 |
| 0.16 | 36279681.08  | 71468866.00   | 134060844.49  | 291795710.18  | 0.57 | 5512.60  | 9791.90  | 16760.39 | 32594.54 |
| 0.17 | 25353901.35  | 49495712.29   | 91734405.76   | 200863201.81  | 0.58 | 4609.10  | 8315.53  | 14173.99 | 27489.82 |
| 0.18 | 17800580.25  | 35076437.11   | 64324761.48   | 142197618.66  | 0.59 | 3925.23  | 6948.83  | 11976.21 | 23122.58 |
| 0.19 | 12820929.15  | 25000576.62   | 46131549.07   | 100049959.59  | 0.60 | 3308.83  | 5950.57  | 10015.46 | 19076.35 |
| 0.20 | 9368662.82   | 18091349.20   | 33593179.69   | 70988704.51   | 0.61 | 2802.16  | 4974.94  | 8438.70  | 16315.98 |
| 0.21 | 6958084.79   | 13399964.81   | 24794549.11   | 52291361.19   | 0.62 | 2375.06  | 4172.18  | 7035.59  | 13835.99 |
| 0.22 | 5225629.90   | 10136464.87   | 18283601.03   | 38333525.99   | 0.63 | 2034.25  | 3517.49  | 5935.14  | 11432.37 |
| 0.23 | 3989713.94   | 7720389.27    | 13933547.43   | 28923098.60   | 0.64 | 1721.31  | 2974.78  | 4944.05  | 9524.48  |
| 0.24 | 3076490.67   | 5905396.96    | 10684329.36   | 22254826.66   | 0.65 | 1451.63  | 2527.16  | 4127.88  | 7769.28  |
| 0.25 | 2390749.37   | 4584819.89    | 8291336.92    | 17380475.14   | 0.66 | 1217.92  | 2135.44  | 3427.61  | 6347.30  |
| 0.26 | 1853368.50   | 3518924.81    | 6520880.61    | 13645846.60   | 0.67 | 1031.34  | 1768.07  | 2880.07  | 5292.46  |
| 0.27 | 1448370.11   | 2763344.68    | 5005544.17    | 10767652.44   | 0.68 | 867.17   | 1493.85  | 2401.60  | 4473.68  |
| 0.28 | 1148547.34   | 2149414.41    | 3960899.04    | 8492666.60    | 0.69 | 727.30   | 1251.14  | 1996.16  | 3727.72  |
| 0.29 | 915848.36    | 1716143.56    | 3193032.38    | 6696534.84    | 0.70 | 612.15   | 1050.05  | 1685.21  | 3071.85  |
| 0.30 | 731139.61    | 1370475.73    | 2541528.68    | 5339228.30    | 0.71 | 510.30   | 878.84   | 1416.32  | 2525.83  |
| 0.31 | 586454.55    | 1117184.43    | 2018675.44    | 4318123.04    | 0.72 | 426.81   | 728.85   | 1161.79  | 2105.06  |
| 0.32 | 472930.64    | 901099.97     | 1639310.65    | 3486547.96    | 0.73 | 353.39   | 606.26   | 964.43   | 1710.11  |
| 0.33 | 383552.96    | 730045.48     | 1325507.78    | 2846004.21    | 0.74 | 293.49   | 501.95   | 794.81   | 1401.93  |
| 0.34 | 312902.55    | 594338.70     | 1082194.02    | 2287855.91    | 0.75 | 244.81   | 410.39   | 647.65   | 1146.50  |
| 0.35 | 257595.43    | 486576.29     | 897012.85     | 1851797.36    | 0.76 | 201.71   | 336.97   | 531.52   | 927.82   |
| 0.36 | 209590.94    | 400251.82     | 739095.76     | 1505432.16    | 0.77 | 164.62   | 276.48   | 432.17   | 749.22   |
| 0.37 | 173351.24    | 328229.94     | 598328.51     | 1237074.94    | 0.78 | 133.72   | 223.54   | 346.59   | 601.16   |
| 0.38 | 143150.57    | 268354.25     | 488823.24     | 1016821.81    | 0.79 | 109.34   | 180.39   | 278.38   | 479.93   |
| 0.39 | 118222.97    | 220801.01     | 394795.11     | 839087.37     | 0.80 | 88.66    | 144.99   | 224.45   | 382.96   |
| 0.40 | 98581.16     | 182510.14     | 327216.88     | 679519.95     | 0.81 | 71.47    | 116.75   | 178.00   | 303.46   |
| 0.41 | 82482.96     | 152046.01     | 266595.67     | 565611.50     | 0.82 | 57.65    | 93.26    | 141.09   | 236.54   |
| 0.42 | 69124.43     | 127103.47     | 223567.65     | 461171.40     | 0.83 | 45.70    | 73.84    | 110.64   | 184.09   |
| 0.43 | 57617.59     | 105767.53     | 187067.80     | 380176.81     | 0.84 | 36.23    | 57.74    | 85.98    | 139.59   |
| 0.44 | 48317.42     | 87926.72      | 155923.38     | 324402.17     | 0.85 | 28.49    | 45.03    | 66.44    | 106.88   |
| 0.45 | 40745.15     | 74346.96      | 131611.06     | 275931.47     | 0.86 | 22.07    | 34.44    | 51.15    | 81.69    |
| 0.46 | 34397.22     | 63188.49      | 111051.83     | 223692.41     | 0.87 | 17.09    | 26.51    | 38.85    | 62.09    |
| 0.47 | 29176.56     | 53603.51      | 93364.72      | 185690.45     | 0.88 | 13.15    | 20.10    | 28.95    | 45.78    |
| 0.48 | 24630.42     | 45238.86      | 78213.93      | 156877.14     | 0.89 | 9.88     | 14.93    | 21.52    | 32.84    |
| 0.49 | 20893.74     | 37868.33      | 64645.71      | 130985.27     | 0.90 | 7.35     | 11.12    | 15.77    | 23.97    |
| 0.50 | 17588.01     | 31976.42      | 55069.07      | 109772.93     |      |          |          |          |          |

Table S435: Critical values for detector  $\hat{H}_{mov,sn}^{m,0.2}$  with windows size  $n = 0.2$ , and IM-OLS estimation in a model with intercept and linear trend. The number of integrated regressors is 4 and the highest power of  $x_{kt}$  is 2.

| m    | 90 %         | 95 %         | 97,5 %       | 99 %         | m    | 90 %    | 95 %    | 97,5 %   | 99 %     |
|------|--------------|--------------|--------------|--------------|------|---------|---------|----------|----------|
| 0.10 | 133653036.66 | 254318471.01 | 461026445.09 | 980784444.88 | 0.51 | 3744.38 | 6665.03 | 11092.93 | 20673.94 |
| 0.11 | 79309211.53  | 150378582.62 | 265691077.81 | 549437447.30 | 0.52 | 3174.60 | 5605.24 | 9246.73  | 17669.76 |
| 0.12 | 48215746.78  | 91841359.50  | 166225001.74 | 343877007.60 | 0.53 | 2674.02 | 4689.73 | 7818.99  | 14609.14 |
| 0.13 | 30678485.82  | 57850911.77  | 105398769.83 | 215074031.20 | 0.54 | 2272.50 | 4001.71 | 6574.92  | 11910.10 |
| 0.14 | 20053324.88  | 37996314.48  | 67729789.64  | 137520737.15 | 0.55 | 1924.40 | 3407.76 | 5507.64  | 10095.48 |
| 0.15 | 13532216.79  | 25598144.63  | 45526735.13  | 94675430.82  | 0.56 | 1637.53 | 2851.14 | 4689.32  | 8582.04  |
| 0.16 | 9260572.46   | 17625372.49  | 31338172.20  | 64663694.24  | 0.57 | 1378.42 | 2395.14 | 3885.14  | 7134.47  |
| 0.17 | 6452744.86   | 12204405.16  | 21883095.01  | 43823523.15  | 0.58 | 1160.22 | 2022.04 | 3374.27  | 6091.40  |
| 0.18 | 4618354.93   | 8795518.48   | 15699452.88  | 31533945.00  | 0.59 | 976.26  | 1730.76 | 2781.99  | 5055.90  |
| 0.19 | 3360509.26   | 6280298.39   | 11145762.43  | 23008822.60  | 0.60 | 828.59  | 1449.23 | 2369.67  | 4222.23  |
| 0.20 | 2469455.19   | 4595529.12   | 8282499.68   | 16723173.14  | 0.61 | 696.57  | 1222.04 | 1995.00  | 3597.71  |
| 0.21 | 1845333.24   | 3465663.88   | 6180225.15   | 12298823.45  | 0.62 | 589.10  | 1037.76 | 1676.88  | 3022.34  |
| 0.22 | 1374151.25   | 2605190.41   | 4564774.43   | 9323701.31   | 0.63 | 499.93  | 860.69  | 1376.12  | 2485.46  |
| 0.23 | 1049642.29   | 1972043.25   | 3434888.57   | 6980506.14   | 0.64 | 415.53  | 725.42  | 1148.80  | 2044.48  |
| 0.24 | 808658.50    | 1484531.95   | 2619586.06   | 5325125.91   | 0.65 | 348.82  | 601.72  | 969.48   | 1729.17  |
| 0.25 | 622824.83    | 1145633.64   | 2038623.28   | 4132646.54   | 0.66 | 296.96  | 506.86  | 817.75   | 1465.94  |
| 0.26 | 481718.42    | 886079.03    | 1555196.97   | 3223014.57   | 0.67 | 247.70  | 425.24  | 685.86   | 1203.60  |
| 0.27 | 374317.22    | 698269.28    | 1220629.18   | 2468154.45   | 0.68 | 207.91  | 357.06  | 567.12   | 1024.76  |
| 0.28 | 299850.94    | 552357.59    | 952835.66    | 1939947.08   | 0.69 | 174.56  | 298.83  | 471.77   | 825.42   |
| 0.29 | 237980.20    | 437560.56    | 766992.45    | 1552458.49   | 0.70 | 145.76  | 246.95  | 394.98   | 689.59   |
| 0.30 | 189524.88    | 351314.47    | 620504.75    | 1245469.38   | 0.71 | 121.16  | 204.28  | 325.79   | 569.41   |
| 0.31 | 152278.20    | 285579.77    | 492285.34    | 996055.80    | 0.72 | 100.97  | 170.24  | 268.98   | 455.64   |
| 0.32 | 123691.88    | 231212.55    | 400975.88    | 812217.55    | 0.73 | 84.64   | 140.62  | 219.99   | 372.91   |
| 0.33 | 100743.96    | 186641.75    | 325688.35    | 649908.97    | 0.74 | 70.50   | 116.86  | 180.27   | 306.64   |
| 0.34 | 81990.39     | 152484.55    | 265612.10    | 526454.55    | 0.75 | 57.79   | 95.45   | 146.83   | 248.67   |
| 0.35 | 67205.71     | 123223.57    | 213482.79    | 426081.65    | 0.76 | 47.65   | 78.67   | 120.40   | 201.69   |
| 0.36 | 55137.64     | 99326.27     | 173949.48    | 349138.53    | 0.77 | 38.65   | 63.38   | 96.68    | 163.08   |
| 0.37 | 45234.37     | 82486.44     | 144207.78    | 281164.87    | 0.78 | 31.68   | 51.41   | 78.60    | 129.22   |
| 0.38 | 37432.42     | 68333.87     | 116783.83    | 232563.25    | 0.79 | 25.98   | 42.40   | 64.52    | 106.76   |
| 0.39 | 31380.22     | 56254.33     | 96183.63     | 192626.95    | 0.80 | 20.84   | 33.56   | 50.67    | 82.86    |
| 0.40 | 25790.34     | 46107.13     | 78845.48     | 155064.39    | 0.81 | 16.73   | 27.04   | 40.88    | 66.10    |
| 0.41 | 21585.36     | 38315.16     | 65051.30     | 127535.35    | 0.82 | 13.56   | 21.87   | 32.62    | 52.96    |
| 0.42 | 17916.30     | 32170.46     | 53766.33     | 102995.39    | 0.83 | 10.74   | 17.28   | 26.05    | 41.05    |
| 0.43 | 14938.17     | 26729.87     | 44998.86     | 86025.20     | 0.84 | 8.56    | 13.61   | 20.05    | 31.73    |
| 0.44 | 12425.63     | 22447.77     | 37916.13     | 73228.20     | 0.85 | 6.70    | 10.62   | 15.54    | 24.35    |
| 0.45 | 10535.43     | 18906.00     | 31867.01     | 60118.50     | 0.86 | 5.29    | 8.20    | 11.87    | 18.43    |
| 0.46 | 8812.16      | 15941.60     | 27182.50     | 52019.76     | 0.87 | 4.08    | 6.29    | 9.09     | 13.99    |
| 0.47 | 7419.25      | 13429.24     | 22604.37     | 43353.08     | 0.88 | 3.13    | 4.77    | 6.85     | 10.34    |
| 0.48 | 6246.74      | 11219.43     | 18971.39     | 35753.34     | 0.89 | 2.40    | 3.58    | 5.06     | 7.75     |
| 0.49 | 5313.24      | 9453.24      | 15643.88     | 29885.91     | 0.90 | 1.83    | 2.70    | 3.76     | 5.55     |
| 0.50 | 4461.00      | 7922.76      | 13260.79     | 24572.96     |      |         |         |          |          |

Table S436: Critical values for detector  $\hat{H}_{mov,sn}^{m,0.3}$  with windows size  $n = 0.3$ , and FM-OLS and D-OLS estimation in a model with intercept and linear trend. The number of integrated regressors is 4 and the highest power of  $x_{kt}$  is 2.

| m    | 90 %         | 95 %          | 97,5 %        | 99 %          | m    | 90 %     | 95 %     | 97,5 %   | 99 %      |
|------|--------------|---------------|---------------|---------------|------|----------|----------|----------|-----------|
| 0.10 | 595790949.23 | 1199749662.23 | 2262927625.83 | 4992976956.83 | 0.51 | 16228.40 | 29452.19 | 50555.47 | 100423.36 |
| 0.11 | 355588172.46 | 695565370.80  | 1302228391.49 | 2945178815.16 | 0.52 | 13578.58 | 24875.78 | 42778.66 | 84957.24  |
| 0.12 | 213493490.49 | 427396614.72  | 811223646.00  | 1776041606.86 | 0.53 | 11515.22 | 20949.10 | 35554.70 | 70369.59  |
| 0.13 | 136236176.65 | 269480079.53  | 501832062.72  | 1102620492.45 | 0.54 | 9750.84  | 17443.88 | 29754.52 | 58945.09  |
| 0.14 | 88669805.00  | 173089385.59  | 332590606.32  | 713722560.44  | 0.55 | 8240.09  | 14872.49 | 24909.35 | 48452.11  |
| 0.15 | 59756605.99  | 118826040.56  | 220750173.71  | 474578724.36  | 0.56 | 6992.35  | 12507.32 | 21056.09 | 41194.29  |
| 0.16 | 40801300.54  | 80150943.23   | 150039385.79  | 326516924.57  | 0.57 | 5916.14  | 10507.64 | 17768.97 | 34581.84  |
| 0.17 | 28603600.21  | 55961603.58   | 102865785.92  | 225109268.34  | 0.58 | 4917.72  | 8869.81  | 15004.32 | 29239.93  |
| 0.18 | 20077778.34  | 39742539.55   | 71936025.11   | 158699582.39  | 0.59 | 4182.96  | 7382.89  | 12664.70 | 24119.80  |
| 0.19 | 14511684.01  | 28290801.45   | 51988703.14   | 113046536.09  | 0.60 | 3507.29  | 6318.61  | 10592.67 | 19992.06  |
| 0.20 | 10648017.78  | 20520454.66   | 37845433.67   | 79455995.49   | 0.61 | 2953.54  | 5241.33  | 8828.44  | 17036.03  |
| 0.21 | 7895983.87   | 15188013.89   | 27937463.88   | 58592108.74   | 0.62 | 2500.86  | 4377.51  | 7327.56  | 14353.50  |
| 0.22 | 5950945.11   | 11477026.10   | 20664861.62   | 43248085.64   | 0.63 | 2133.18  | 3683.73  | 6201.33  | 11861.19  |
| 0.23 | 4534483.40   | 8752426.82    | 15709867.44   | 32347702.07   | 0.64 | 1798.71  | 3088.75  | 5132.50  | 9842.53   |
| 0.24 | 3514865.55   | 6714845.74    | 12064072.68   | 25377592.66   | 0.65 | 1509.05  | 2619.40  | 4273.86  | 7968.15   |
| 0.25 | 2712033.42   | 5195732.11    | 9396979.08    | 19606123.51   | 0.66 | 1262.74  | 2205.27  | 3539.77  | 6487.34   |
| 0.26 | 2111011.87   | 4016381.91    | 7368021.77    | 15402405.19   | 0.67 | 1064.01  | 1816.25  | 2944.60  | 5435.10   |
| 0.27 | 1647700.94   | 3140393.33    | 5667651.80    | 12037519.42   | 0.68 | 891.64   | 1531.48  | 2452.16  | 4532.62   |
| 0.28 | 1306905.61   | 2445036.63    | 4474001.04    | 9637690.40    | 0.69 | 745.68   | 1278.12  | 2031.98  | 3784.10   |
| 0.29 | 1040775.58   | 1944642.32    | 3589896.02    | 7515264.19    | 0.70 | 624.27   | 1068.03  | 1708.01  | 3111.23   |
| 0.30 | 831660.66    | 1549251.93    | 2878646.63    | 6042078.39    | 0.71 | 519.04   | 891.98   | 1435.28  | 2551.52   |
| 0.31 | 666021.29    | 1266457.11    | 2293380.95    | 4820558.35    | 0.72 | 432.86   | 736.14   | 1175.32  | 2116.89   |
| 0.32 | 537301.27    | 1022134.31    | 1855243.03    | 3921193.89    | 0.73 | 357.27   | 611.86   | 973.08   | 1721.44   |
| 0.33 | 434057.79    | 824942.55     | 1492545.35    | 3184048.58    | 0.74 | 296.13   | 505.50   | 799.12   | 1404.93   |
| 0.34 | 354810.36    | 670664.90     | 1221456.68    | 2564865.52    | 0.75 | 246.55   | 412.58   | 650.84   | 1150.66   |
| 0.35 | 291431.29    | 553194.88     | 1010667.70    | 2085674.53    | 0.76 | 202.61   | 338.56   | 532.68   | 931.09    |
| 0.36 | 236899.45    | 453604.60     | 825412.05     | 1676264.06    | 0.77 | 165.15   | 277.17   | 432.64   | 750.04    |
| 0.37 | 195385.00    | 371483.20     | 670144.05     | 1375150.78    | 0.78 | 134.04   | 223.80   | 346.91   | 601.95    |
| 0.38 | 161993.43    | 301439.38     | 547136.48     | 1130783.94    | 0.79 | 109.50   | 180.52   | 278.52   | 480.17    |
| 0.39 | 132502.39    | 248254.87     | 441739.08     | 932267.00     | 0.80 | 88.78    | 145.12   | 224.62   | 383.11    |
| 0.40 | 110700.88    | 204772.06     | 366182.38     | 755504.81     | 0.81 | 71.58    | 116.85   | 178.11   | 303.63    |
| 0.41 | 92440.25     | 170086.37     | 299143.79     | 628174.47     | 0.82 | 57.77    | 93.43    | 141.24   | 236.62    |
| 0.42 | 77044.60     | 142266.10     | 249269.40     | 511740.56     | 0.83 | 45.81    | 73.96    | 110.72   | 184.13    |
| 0.43 | 64444.51     | 117983.70     | 208841.86     | 420285.99     | 0.84 | 36.33    | 57.85    | 86.10    | 139.67    |
| 0.44 | 53866.07     | 97580.37      | 173313.29     | 356068.61     | 0.85 | 28.60    | 45.17    | 66.54    | 107.05    |
| 0.45 | 45347.55     | 82231.78      | 144842.42     | 302776.41     | 0.86 | 22.18    | 34.54    | 51.32    | 81.78     |
| 0.46 | 38202.31     | 70370.58      | 122861.06     | 245459.58     | 0.87 | 17.22    | 26.63    | 38.96    | 62.17     |
| 0.47 | 32302.68     | 59219.58      | 102656.68     | 204275.42     | 0.88 | 13.25    | 20.21    | 29.06    | 45.90     |
| 0.48 | 27209.52     | 49818.23      | 85456.93      | 171399.78     | 0.89 | 10.00    | 15.04    | 21.62    | 32.96     |
| 0.49 | 22951.24     | 41572.36      | 70575.17      | 141975.86     | 0.90 | 7.45     | 11.23    | 15.88    | 24.06     |
| 0.50 | 19281.98     | 34983.54      | 59940.18      | 119023.05     |      |          |          |          |           |

Table S437: Critical values for detector  $\hat{H}_{mov,sn}^{m,0.3}$  with windows size  $n = 0.3$ , and IM-OLS estimation in a model with intercept and linear trend. The number of integrated regressors is 4 and the highest power of  $x_{kt}$  is 2.

| m    | 90 %          | 95 %          | 97,5 %         | 99 %           | m    | 90 %    | 95 %     | 97,5 %   | 99 %      |
|------|---------------|---------------|----------------|----------------|------|---------|----------|----------|-----------|
| 0.10 | 2010931309.01 | 7349827919.03 | 21468205006.19 | 71548736747.28 | 0.51 | 7801.21 | 26438.41 | 75170.22 | 232310.36 |
| 0.11 | 1085268241.13 | 3961022941.21 | 11421010072.82 | 37569955136.03 | 0.52 | 6396.78 | 21647.91 | 60545.95 | 181513.78 |
| 0.12 | 622128308.01  | 2279813064.41 | 6555566151.94  | 21489442072.26 | 0.53 | 5245.93 | 17891.49 | 49685.71 | 154533.94 |
| 0.13 | 369071571.00  | 1308850503.40 | 3871402937.42  | 12342824119.40 | 0.54 | 4278.83 | 14656.34 | 39777.37 | 124149.77 |
| 0.14 | 223936990.89  | 799086145.74  | 2361513849.27  | 7771636904.35  | 0.55 | 3457.78 | 11860.09 | 31404.24 | 103927.04 |
| 0.15 | 137706401.42  | 499138293.22  | 1494628648.08  | 4881309873.83  | 0.56 | 2808.90 | 9570.51  | 25835.71 | 81520.76  |
| 0.16 | 89059006.44   | 315375850.89  | 938518280.99   | 3179822280.29  | 0.57 | 2307.54 | 7654.01  | 20473.78 | 63700.35  |
| 0.17 | 58775869.71   | 209198431.30  | 602390994.13   | 2018948800.60  | 0.58 | 1880.42 | 6191.85  | 16847.21 | 52333.21  |
| 0.18 | 38701313.19   | 137784354.39  | 389180630.46   | 1275899234.85  | 0.59 | 1549.04 | 5068.33  | 13782.37 | 41546.59  |
| 0.19 | 26830572.08   | 95035305.36   | 270843835.83   | 893561245.59   | 0.60 | 1261.14 | 4092.40  | 10991.94 | 34967.92  |
| 0.20 | 18622371.65   | 66723285.53   | 188900646.18   | 618943429.60   | 0.61 | 1037.03 | 3348.14  | 8942.73  | 27745.08  |
| 0.21 | 13277128.95   | 47734759.34   | 137223199.84   | 432339997.35   | 0.62 | 839.69  | 2722.35  | 7315.31  | 22940.36  |
| 0.22 | 9673387.55    | 34154511.05   | 99214060.31    | 305021750.69   | 0.63 | 692.30  | 2205.60  | 5996.24  | 18044.37  |
| 0.23 | 6896462.32    | 24986168.72   | 71536249.42    | 223893115.74   | 0.64 | 572.97  | 1795.94  | 4815.39  | 14404.39  |
| 0.24 | 5108420.31    | 18443019.32   | 53516431.37    | 162956275.92   | 0.65 | 474.25  | 1472.36  | 3834.25  | 11487.01  |
| 0.25 | 3768706.44    | 13237466.74   | 38588616.78    | 120643912.69   | 0.66 | 382.89  | 1193.95  | 3199.36  | 9651.78   |
| 0.26 | 2754431.73    | 9990936.72    | 28646316.22    | 88036364.16    | 0.67 | 310.93  | 956.14   | 2611.61  | 7421.06   |
| 0.27 | 2066909.80    | 7474893.66    | 21110224.19    | 64913929.55    | 0.68 | 252.57  | 780.69   | 2078.90  | 6084.82   |
| 0.28 | 1554306.86    | 5624661.19    | 16009198.88    | 50428245.80    | 0.69 | 208.99  | 631.15   | 1634.78  | 4799.70   |
| 0.29 | 1181402.62    | 4226090.42    | 12079730.17    | 39933757.80    | 0.70 | 170.14  | 498.96   | 1279.24  | 3847.86   |
| 0.30 | 895195.88     | 3206968.52    | 8958059.40     | 29557132.37    | 0.71 | 138.66  | 399.67   | 1044.38  | 3087.54   |
| 0.31 | 687249.68     | 2511444.64    | 7172260.09     | 22844168.72    | 0.72 | 113.24  | 317.88   | 833.88   | 2443.69   |
| 0.32 | 525110.19     | 1925869.38    | 5564780.02     | 17592158.51    | 0.73 | 92.22   | 256.85   | 652.60   | 1945.26   |
| 0.33 | 406784.21     | 1480694.48    | 4339343.31     | 13590066.59    | 0.74 | 74.12   | 203.85   | 523.85   | 1482.38   |
| 0.34 | 320427.21     | 1142655.82    | 3336779.36     | 10394605.02    | 0.75 | 60.21   | 160.53   | 411.53   | 1182.48   |
| 0.35 | 252060.77     | 908470.76     | 2602904.41     | 8321356.52     | 0.76 | 48.92   | 129.62   | 320.50   | 893.80    |
| 0.36 | 198553.30     | 708516.54     | 2067043.61     | 6585277.67     | 0.77 | 38.87   | 101.51   | 249.37   | 688.24    |
| 0.37 | 155535.02     | 554647.55     | 1650015.88     | 5225901.30     | 0.78 | 31.57   | 77.58    | 186.30   | 520.46    |
| 0.38 | 124377.26     | 442085.75     | 1276670.40     | 4111432.32     | 0.79 | 25.36   | 60.96    | 142.83   | 395.90    |
| 0.39 | 99622.66      | 356500.27     | 1007407.57     | 3154031.44     | 0.80 | 20.10   | 48.14    | 110.25   | 300.01    |
| 0.40 | 78205.89      | 279889.65     | 805647.30      | 2556131.31     | 0.81 | 16.29   | 37.58    | 85.29    | 227.54    |
| 0.41 | 62558.35      | 225388.70     | 634657.37      | 2092015.70     | 0.82 | 12.97   | 29.30    | 64.50    | 166.59    |
| 0.42 | 50160.17      | 176673.10     | 510144.63      | 1626949.13     | 0.83 | 10.16   | 21.76    | 49.23    | 124.84    |
| 0.43 | 40069.96      | 144385.02     | 416260.54      | 1317504.25     | 0.84 | 7.96    | 16.65    | 35.43    | 91.99     |
| 0.44 | 31945.88      | 113884.30     | 331579.77      | 1028895.86     | 0.85 | 6.10    | 12.61    | 26.50    | 63.36     |
| 0.45 | 26145.05      | 91649.51      | 265663.87      | 847940.09      | 0.86 | 4.70    | 9.49     | 18.84    | 44.12     |
| 0.46 | 21276.04      | 75296.64      | 216233.99      | 668033.84      | 0.87 | 3.60    | 6.93     | 13.35    | 33.06     |
| 0.47 | 17651.33      | 60362.07      | 173757.46      | 550966.47      | 0.88 | 2.66    | 5.00     | 9.40     | 21.39     |
| 0.48 | 14350.93      | 49687.87      | 138996.30      | 439234.04      | 0.89 | 1.98    | 3.59     | 6.47     | 14.11     |
| 0.49 | 11792.09      | 40380.84      | 114018.98      | 350707.28      | 0.90 | 1.44    | 2.56     | 4.41     | 9.36      |
| 0.50 | 9539.76       | 31853.41      | 91298.19       | 276005.89      |      |         |          |          |           |

Table S438: Critical values for detector  $\hat{H}_{mov,sn}^{m,0.1}$  with windows size  $n = 0.1$ , and FM-OLS and D-OLS estimation in a model with intercept. The number of integrated regressors is 4 and the highest power of  $x_{kt}$  is 3.

| m    | 90 %           | 95 %           | 97.5 %          | 99 %            | m    | 90 %     | 95 %      | 97.5 %    | 99 %       |
|------|----------------|----------------|-----------------|-----------------|------|----------|-----------|-----------|------------|
| 0.10 | 17695185961.66 | 67128092886.78 | 206932207870.02 | 736469148281.59 | 0.51 | 64196.46 | 227805.56 | 674459.66 | 2217503.94 |
| 0.11 | 9402970959.79  | 35337487500.78 | 108050942022.94 | 385419061673.24 | 0.52 | 52357.00 | 186887.76 | 563095.73 | 1769509.04 |
| 0.12 | 5347520131.93  | 20638029130.20 | 60690181215.04  | 210530790394.31 | 0.53 | 42415.41 | 151199.00 | 439347.84 | 1467178.55 |
| 0.13 | 3097474168.78  | 12057789424.34 | 37003165895.57  | 138678639120.69 | 0.54 | 34942.87 | 122929.49 | 348014.35 | 1176387.70 |
| 0.14 | 1916854728.07  | 7482845188.82  | 23056747643.48  | 78261012195.52  | 0.55 | 28459.98 | 99604.57  | 283908.48 | 941832.99  |
| 0.15 | 1189298345.63  | 4596922362.50  | 14404496311.78  | 49465850793.55  | 0.56 | 23105.05 | 80824.50  | 235716.58 | 769468.51  |
| 0.16 | 772113973.23   | 2935554182.98  | 9257228022.92   | 30791021662.99  | 0.57 | 18591.66 | 67384.58  | 193064.47 | 635032.57  |
| 0.17 | 513986318.29   | 1947124808.07  | 6177253484.62   | 20945140446.49  | 0.58 | 15009.03 | 54930.13  | 156943.39 | 510599.42  |
| 0.18 | 338299521.57   | 1314389149.20  | 3991235312.07   | 13725748491.16  | 0.59 | 12278.12 | 44883.53  | 128628.35 | 417385.61  |
| 0.19 | 230394250.02   | 878253824.59   | 2746470135.12   | 9357241457.81   | 0.60 | 10027.15 | 36784.94  | 105439.04 | 338970.93  |
| 0.20 | 160707147.95   | 621694535.84   | 1890851528.95   | 6614185230.15   | 0.61 | 8192.29  | 29614.34  | 87231.29  | 275108.75  |
| 0.21 | 112004078.05   | 430233267.32   | 1360827864.52   | 4755377301.51   | 0.62 | 6626.49  | 23846.08  | 70002.62  | 218189.56  |
| 0.22 | 81176688.24    | 299647613.66   | 921430636.44    | 3300050997.90   | 0.63 | 5499.46  | 18986.93  | 55750.70  | 172086.10  |
| 0.23 | 58269987.88    | 214309047.08   | 658300249.26    | 2312781051.50   | 0.64 | 4503.21  | 15461.36  | 44341.33  | 142047.53  |
| 0.24 | 42008402.90    | 156141045.39   | 483082089.03    | 1716415239.95   | 0.65 | 3645.48  | 12538.98  | 36000.31  | 118662.18  |
| 0.25 | 30042058.45    | 114071962.17   | 347420520.77    | 1230478191.49   | 0.66 | 2997.93  | 10143.65  | 28954.33  | 93914.45   |
| 0.26 | 22132593.71    | 84762332.18    | 253004624.59    | 887454571.40    | 0.67 | 2418.12  | 8321.08   | 23076.50  | 76008.97   |
| 0.27 | 16655053.71    | 64666211.53    | 189131826.19    | 675297677.70    | 0.68 | 1948.17  | 6672.44   | 18515.40  | 59074.39   |
| 0.28 | 12847080.56    | 48995712.98    | 146254872.03    | 507363711.26    | 0.69 | 1588.44  | 5277.36   | 14958.40  | 45806.07   |
| 0.29 | 9938350.33     | 37418480.23    | 113102250.07    | 386613800.58    | 0.70 | 1301.57  | 4296.94   | 11782.00  | 35769.28   |
| 0.30 | 7455651.79     | 28338995.42    | 86526968.94     | 287369192.83    | 0.71 | 1050.82  | 3401.04   | 9341.81   | 28752.17   |
| 0.31 | 5646395.98     | 21179840.61    | 64778991.67     | 217379977.48    | 0.72 | 826.71   | 2723.26   | 7343.68   | 23426.89   |
| 0.32 | 4478710.29     | 16792902.91    | 50890459.56     | 167152622.80    | 0.73 | 660.31   | 2179.08   | 5866.07   | 18013.14   |
| 0.33 | 3525617.02     | 13059164.42    | 40391099.92     | 134838734.60    | 0.74 | 527.03   | 1703.75   | 4636.40   | 14060.94   |
| 0.34 | 2696247.12     | 10342872.27    | 31837285.32     | 102910415.60    | 0.75 | 426.62   | 1356.66   | 3635.12   | 10805.92   |
| 0.35 | 2103314.62     | 8004580.08     | 24023749.67     | 81692869.95     | 0.76 | 339.06   | 1049.76   | 2810.30   | 8506.89    |
| 0.36 | 1635306.41     | 6342713.00     | 18947572.74     | 64518396.68     | 0.77 | 268.61   | 805.68    | 2139.47   | 6353.11    |
| 0.37 | 1291644.34     | 5021735.34     | 14835054.08     | 50826523.74     | 0.78 | 214.04   | 627.76    | 1638.19   | 4879.21    |
| 0.38 | 1028326.13     | 3950243.74     | 11495958.34     | 40399625.31     | 0.79 | 170.16   | 483.39    | 1244.61   | 3696.63    |
| 0.39 | 824758.99      | 3099379.10     | 9204434.52      | 31969970.89     | 0.80 | 132.69   | 371.49    | 963.93    | 2761.48    |
| 0.40 | 650693.00      | 2453042.67     | 7514520.30      | 25288663.60     | 0.81 | 104.82   | 286.16    | 732.38    | 2110.96    |
| 0.41 | 516178.13      | 1946475.30     | 5904744.23      | 20421657.23     | 0.82 | 82.04    | 216.99    | 548.97    | 1584.31    |
| 0.42 | 407736.28      | 1529435.01     | 4718143.62      | 16077147.73     | 0.83 | 64.06    | 163.47    | 408.84    | 1158.05    |
| 0.43 | 324664.28      | 1221316.06     | 3687250.22      | 12630483.13     | 0.84 | 49.47    | 121.82    | 300.10    | 840.61     |
| 0.44 | 262909.52      | 977261.05      | 2909396.16      | 9916991.32      | 0.85 | 37.59    | 90.28     | 220.18    | 591.68     |
| 0.45 | 212021.06      | 785544.26      | 2391825.00      | 7984676.06      | 0.86 | 28.93    | 66.69     | 155.41    | 413.46     |
| 0.46 | 175531.64      | 647217.51      | 1921977.67      | 6494713.73      | 0.87 | 21.96    | 48.69     | 108.88    | 286.04     |
| 0.47 | 141142.09      | 517866.91      | 1550342.93      | 5295349.95      | 0.88 | 16.45    | 34.97     | 75.36     | 193.67     |
| 0.48 | 116570.54      | 423855.50      | 1218925.75      | 4340351.07      | 0.89 | 12.16    | 24.73     | 52.16     | 129.27     |
| 0.49 | 95746.67       | 344908.08      | 1010059.96      | 3371266.03      | 0.90 | 8.78     | 17.02     | 34.28     | 81.20      |
| 0.50 | 78479.76       | 280604.24      | 826500.67       | 2746310.70      |      |          |           |           |            |

Table S439: Critical values for detector  $\hat{H}_{mov,sn}^{m,0.1}$  with windows size  $n = 0.1$ , and IM-OLS estimation in a model with intercept. The number of integrated regressors is 4 and the highest power of  $x_{kt}$  is 3.



| m    | 90 %          | 95 %           | 97,5 %         | 99 %            | m    | 90 %     | 95 %     | 97,5 %    | 99 %      |
|------|---------------|----------------|----------------|-----------------|------|----------|----------|-----------|-----------|
| 0.10 | 2999229101.69 | 10872662343.64 | 32284474914.55 | 106286898370.65 | 0.51 | 10556.55 | 35306.83 | 100469.61 | 300941.91 |
| 0.11 | 1612472790.87 | 5924846413.43  | 17017664138.90 | 56350980527.95  | 0.52 | 8599.19  | 28900.21 | 80384.25  | 237243.13 |
| 0.12 | 914592583.80  | 3390298894.70  | 9764875293.19  | 32555063219.42  | 0.53 | 7053.68  | 23574.23 | 66293.50  | 203434.74 |
| 0.13 | 547940349.68  | 1935724604.19  | 5756201814.67  | 18232762441.12  | 0.54 | 5700.26  | 19410.95 | 52537.43  | 160805.53 |
| 0.14 | 329403625.13  | 1183697577.20  | 3548961509.91  | 11737144686.30  | 0.55 | 4589.75  | 15553.53 | 41455.80  | 131762.53 |
| 0.15 | 203231314.12  | 737863969.40   | 2206299881.01  | 7373315232.75   | 0.56 | 3723.93  | 12603.70 | 33466.69  | 103388.61 |
| 0.16 | 131161630.35  | 467290397.98   | 1394758667.45  | 4732976375.62   | 0.57 | 3031.71  | 9849.34  | 26648.18  | 82140.34  |
| 0.17 | 86265384.80   | 309870368.05   | 900757415.84   | 3034773788.52   | 0.58 | 2471.16  | 8071.23  | 21294.47  | 66593.84  |
| 0.18 | 56545457.09   | 202924999.75   | 581084472.61   | 1907383042.32   | 0.59 | 2009.76  | 6557.62  | 17345.03  | 53086.35  |
| 0.19 | 39394487.28   | 141858553.56   | 396320438.89   | 1328564114.99   | 0.60 | 1632.89  | 5249.34  | 13926.37  | 43568.29  |
| 0.20 | 27208619.29   | 98117052.19    | 277125159.04   | 911983750.75    | 0.61 | 1333.98  | 4259.84  | 11107.44  | 34996.94  |
| 0.21 | 19531264.65   | 70429293.74    | 201168232.24   | 642224576.74    | 0.62 | 1074.49  | 3422.75  | 9032.53   | 28637.38  |
| 0.22 | 14172754.14   | 50659544.64    | 146249979.60   | 456610827.62    | 0.63 | 885.06   | 2784.41  | 7389.56   | 21856.31  |
| 0.23 | 10130954.59   | 36964554.15    | 105233447.02   | 328327808.77    | 0.64 | 727.09   | 2267.11  | 5922.68   | 17325.22  |
| 0.24 | 7506377.78    | 26763414.49    | 77768503.68    | 239402538.31    | 0.65 | 600.12   | 1811.33  | 4704.13   | 13828.56  |
| 0.25 | 5519645.88    | 19390206.81    | 56845965.09    | 176528626.24    | 0.66 | 486.03   | 1475.00  | 3868.22   | 11480.14  |
| 0.26 | 4000689.89    | 14592478.11    | 42009102.22    | 129825555.83    | 0.67 | 389.76   | 1160.21  | 3106.69   | 8815.88   |
| 0.27 | 2950869.30    | 10785279.47    | 31118223.87    | 94502864.55     | 0.68 | 313.23   | 937.19   | 2492.09   | 7172.00   |
| 0.28 | 2243252.62    | 8145590.42     | 23223895.30    | 71439763.75     | 0.69 | 256.58   | 749.35   | 1926.18   | 5531.69   |
| 0.29 | 1689081.61    | 6135126.36     | 17522136.21    | 57908735.04     | 0.70 | 206.05   | 593.91   | 1494.84   | 4401.41   |
| 0.30 | 1280298.62    | 4620703.97     | 12849595.35    | 42290615.77     | 0.71 | 168.06   | 473.51   | 1202.22   | 3493.00   |
| 0.31 | 981104.65     | 3594445.03     | 10204829.65    | 32404994.84     | 0.72 | 135.38   | 371.55   | 955.77    | 2749.68   |
| 0.32 | 753101.40     | 2771467.54     | 7950947.34     | 25065562.38     | 0.73 | 109.41   | 298.28   | 746.38    | 2137.62   |
| 0.33 | 579848.73     | 2118669.86     | 6211761.86     | 19501108.34     | 0.74 | 87.46    | 233.15   | 590.91    | 1657.99   |
| 0.34 | 457892.70     | 1626020.24     | 4746788.13     | 14854227.39     | 0.75 | 70.01    | 181.76   | 457.16    | 1297.44   |
| 0.35 | 356774.74     | 1286528.15     | 3716497.03     | 11936280.35     | 0.76 | 56.43    | 144.29   | 353.93    | 973.40    |
| 0.36 | 280932.20     | 1002345.61     | 2920370.45     | 9408433.76      | 0.77 | 44.46    | 112.36   | 271.68    | 742.25    |
| 0.37 | 220263.79     | 789871.34      | 2328111.36     | 7425578.32      | 0.78 | 35.55    | 85.72    | 201.57    | 550.26    |
| 0.38 | 176893.48     | 617415.79      | 1807303.67     | 5672844.92      | 0.79 | 28.38    | 66.42    | 153.53    | 419.36    |
| 0.39 | 141374.06     | 498863.31      | 1410398.44     | 4486603.16      | 0.80 | 22.22    | 51.83    | 116.88    | 314.34    |
| 0.40 | 110115.51     | 393137.79      | 1125232.25     | 3544061.87      | 0.81 | 17.73    | 40.03    | 89.63     | 235.60    |
| 0.41 | 87787.26      | 313925.97      | 879210.33      | 2873661.60      | 0.82 | 13.93    | 30.88    | 66.99     | 171.23    |
| 0.42 | 69726.48      | 244832.04      | 697036.55      | 2244128.22      | 0.83 | 10.79    | 22.80    | 50.99     | 127.06    |
| 0.43 | 55424.10      | 199067.97      | 576666.85      | 1765216.27      | 0.84 | 8.35     | 17.25    | 36.28     | 93.50     |
| 0.44 | 44069.45      | 156042.36      | 458244.08      | 1403176.76      | 0.85 | 6.34     | 13.02    | 27.01     | 64.66     |
| 0.45 | 36061.89      | 126363.67      | 365012.84      | 1122720.57      | 0.86 | 4.86     | 9.68     | 19.11     | 44.56     |
| 0.46 | 29606.51      | 103770.90      | 295627.98      | 915002.95       | 0.87 | 3.70     | 7.04     | 13.49     | 33.21     |
| 0.47 | 23835.84      | 82644.32       | 234685.32      | 752773.86       | 0.88 | 2.74     | 5.08     | 9.47      | 21.51     |
| 0.48 | 19501.00      | 67502.51       | 187359.55      | 586744.97       | 0.89 | 2.05     | 3.68     | 6.53      | 14.17     |
| 0.49 | 15998.83      | 54612.72       | 153391.30      | 456175.98       | 0.90 | 1.53     | 2.64     | 4.50      | 9.43      |
| 0.50 | 12906.53      | 42878.45       | 122418.17      | 366140.15       |      |          |          |           |           |

Table S440: Critical values for detector  $\hat{H}_{mov,sn}^{m,0.2}$  with windows size  $n = 0.2$ , and FM-OLS and D-OLS estimation in a model with intercept. The number of integrated regressors is 4 and the highest power of  $x_{kt}$  is 3.

| m    | 90 %           | 95 %            | 97.5 %          | 99 %             | m    | 90 %     | 95 %      | 97.5 %    | 99 %       |
|------|----------------|-----------------|-----------------|------------------|------|----------|-----------|-----------|------------|
| 0.10 | 26147945115.00 | 100227058992.73 | 308633273277.24 | 1111248322603.97 | 0.51 | 85937.15 | 303987.14 | 904973.98 | 2923995.22 |
| 0.11 | 13981651135.54 | 52350964365.83  | 162728887764.26 | 583991746830.44  | 0.52 | 70225.61 | 248296.06 | 733814.73 | 2327734.27 |
| 0.12 | 7907243968.91  | 30532448530.34  | 90777851417.68  | 315526766906.92  | 0.53 | 56434.13 | 201098.10 | 583060.64 | 1890467.24 |
| 0.13 | 4571055202.26  | 17682773288.71  | 54944363077.81  | 207937195247.41  | 0.54 | 45959.32 | 162240.33 | 458352.46 | 1513331.35 |
| 0.14 | 2831712796.58  | 11178183034.73  | 34511963812.95  | 118387005212.05  | 0.55 | 37861.55 | 131612.64 | 371660.45 | 1190610.44 |
| 0.15 | 1751418051.52  | 6809136326.64   | 21557296186.06  | 74265808892.21   | 0.56 | 30196.41 | 105866.46 | 306909.32 | 983167.47  |
| 0.16 | 1141754267.37  | 4323162458.94   | 13984237663.24  | 46131891615.25   | 0.57 | 24363.24 | 86743.39  | 248921.52 | 806718.91  |
| 0.17 | 756426734.11   | 2881507026.82   | 9205184759.21   | 31436643220.52   | 0.58 | 19603.89 | 70655.20  | 199133.04 | 644605.04  |
| 0.18 | 493327982.23   | 1930336910.77   | 5895229703.89   | 20593294501.49   | 0.59 | 16024.06 | 57269.05  | 162661.90 | 521559.04  |
| 0.19 | 338806086.22   | 1296914730.70   | 4047609588.83   | 13718319642.88   | 0.60 | 12926.45 | 46706.92  | 133569.80 | 416844.39  |
| 0.20 | 234317877.62   | 906888313.10    | 2816379994.13   | 9803647540.83    | 0.61 | 10481.01 | 37394.51  | 108883.19 | 338981.74  |
| 0.21 | 162471980.27   | 636014228.47    | 2000967207.27   | 6927246806.40    | 0.62 | 8484.68  | 29989.80  | 86805.19  | 268371.66  |
| 0.22 | 117283248.18   | 438672776.27    | 1360353669.80   | 4872238572.24    | 0.63 | 6963.92  | 23693.03  | 68277.62  | 215215.93  |
| 0.23 | 85162663.61    | 314464658.79    | 968623511.61    | 3421127299.15    | 0.64 | 5686.38  | 19297.44  | 54883.51  | 172702.83  |
| 0.24 | 61050058.06    | 229029983.95    | 705415304.63    | 2511135997.06    | 0.65 | 4577.49  | 15470.83  | 43295.57  | 142360.90  |
| 0.25 | 43556412.50    | 165686158.84    | 507459809.35    | 1803700801.09    | 0.66 | 3702.94  | 12330.41  | 35182.95  | 113668.33  |
| 0.26 | 31989463.05    | 122759339.20    | 368484579.83    | 1268828867.13    | 0.67 | 2992.00  | 10107.30  | 27351.58  | 88099.85   |
| 0.27 | 24064658.66    | 93630426.21     | 270945532.95    | 976851888.49     | 0.68 | 2379.53  | 8017.32   | 22100.01  | 69866.28   |
| 0.28 | 18663220.82    | 70488467.44     | 210447797.48    | 749139503.43     | 0.69 | 1935.38  | 6349.92   | 17742.23  | 53826.65   |
| 0.29 | 14213251.81    | 54297500.08     | 161633184.77    | 557867975.82     | 0.70 | 1583.03  | 5080.07   | 13829.04  | 41590.46   |
| 0.30 | 10754691.40    | 40575033.47     | 123606927.01    | 418036906.66     | 0.71 | 1265.09  | 3964.21   | 10723.62  | 33088.61   |
| 0.31 | 8118734.27     | 30455867.77     | 93181449.26     | 312383284.05     | 0.72 | 992.71   | 3149.68   | 8331.98   | 25938.35   |
| 0.32 | 6449750.34     | 23848409.45     | 73586858.38     | 240511350.14     | 0.73 | 787.81   | 2529.65   | 6628.90   | 20030.34   |
| 0.33 | 5045304.05     | 18662116.61     | 57069748.44     | 189225850.29     | 0.74 | 618.87   | 1955.97   | 5181.08   | 15596.61   |
| 0.34 | 3858387.90     | 14799021.64     | 45556087.64     | 148798610.61     | 0.75 | 492.90   | 1521.89   | 4092.17   | 11990.04   |
| 0.35 | 2976600.35     | 11348249.98     | 33723748.27     | 116219170.65     | 0.76 | 388.37   | 1168.24   | 3100.23   | 9106.58    |
| 0.36 | 2316209.36     | 8935708.90      | 27070486.51     | 90373513.47      | 0.77 | 306.31   | 894.57    | 2331.56   | 6813.62    |
| 0.37 | 1801356.35     | 7142573.93      | 20847128.65     | 72477413.15      | 0.78 | 240.78   | 685.23    | 1769.75   | 5202.97    |
| 0.38 | 1447616.27     | 5568803.41      | 16243622.59     | 57506601.88      | 0.79 | 189.41   | 529.52    | 1325.33   | 3947.76    |
| 0.39 | 1152360.95     | 4317541.78      | 12847171.52     | 45070452.19      | 0.80 | 146.39   | 399.67    | 1020.02   | 2883.60    |
| 0.40 | 913877.08      | 3419148.53      | 10319962.33     | 35021261.93      | 0.81 | 114.01   | 304.59    | 771.09    | 2197.20    |
| 0.41 | 723239.88      | 2698239.77      | 8208774.02      | 28222185.77      | 0.82 | 88.29    | 230.36    | 573.39    | 1634.80    |
| 0.42 | 568514.12      | 2127788.87      | 6545403.34      | 22404491.46      | 0.83 | 68.23    | 170.71    | 420.35    | 1185.32    |
| 0.43 | 450905.78      | 1688587.80      | 5106384.23      | 17351353.75      | 0.84 | 52.00    | 126.25    | 305.98    | 860.47     |
| 0.44 | 362961.59      | 1341419.27      | 3975371.09      | 13658860.32      | 0.85 | 39.22    | 92.86     | 223.69    | 597.28     |
| 0.45 | 290813.68      | 1074563.68      | 3289767.87      | 10973637.97      | 0.86 | 29.89    | 67.75     | 156.96    | 416.74     |
| 0.46 | 240402.13      | 877774.15       | 2635037.66      | 8768174.53       | 0.87 | 22.46    | 49.38     | 109.62    | 287.57     |
| 0.47 | 193721.65      | 699728.44       | 2079467.10      | 7132155.54       | 0.88 | 16.70    | 35.31     | 75.66     | 194.45     |
| 0.48 | 158648.52      | 575929.24       | 1638029.37      | 5684715.95       | 0.89 | 12.32    | 24.87     | 52.36     | 129.41     |
| 0.49 | 129412.14      | 465152.21       | 1362861.30      | 4429525.94       | 0.90 | 8.90     | 17.15     | 34.37     | 81.37      |
| 0.50 | 106409.41      | 374069.25       | 1118056.62      | 3602671.64       |      |          |           |           |            |

Table S441: Critical values for detector  $\hat{H}_{mov,sn}^{m,0.2}$  with windows size  $n = 0.2$ , and IM-OLS estimation in a model with intercept. The number of integrated regressors is 4 and the highest power of  $x_{kt}$  is 3.

| m    | 90 %          | 95 %           | 97,5 %         | 99 %            | m    | 90 %     | 95 %     | 97,5 %    | 99 %      |
|------|---------------|----------------|----------------|-----------------|------|----------|----------|-----------|-----------|
| 0.10 | 3439119935.45 | 12583776702.31 | 37420511413.38 | 124259388939.70 | 0.51 | 11329.71 | 37802.22 | 106740.88 | 315726.96 |
| 0.11 | 1855337785.22 | 6871668975.76  | 19771320880.15 | 64801807808.40  | 0.52 | 9195.14  | 30602.59 | 84445.72  | 250511.50 |
| 0.12 | 1048855052.01 | 3916284619.77  | 11221230134.83 | 37513282638.19  | 0.53 | 7589.34  | 25082.64 | 69644.46  | 212969.17 |
| 0.13 | 625179087.82  | 2244964950.80  | 6620032901.36  | 21005074433.24  | 0.54 | 6090.89  | 20524.11 | 55469.46  | 169101.12 |
| 0.14 | 376759860.19  | 1361357019.34  | 4097164855.20  | 13188934296.07  | 0.55 | 4870.88  | 16435.76 | 43697.68  | 137978.24 |
| 0.15 | 232768075.55  | 850440395.18   | 2521913281.24  | 8458721539.84   | 0.56 | 3953.89  | 13373.62 | 35136.89  | 107347.68 |
| 0.16 | 149768619.20  | 531548580.96   | 1597615048.36  | 5372725624.87   | 0.57 | 3211.57  | 10308.46 | 27885.29  | 84658.19  |
| 0.17 | 98047790.82   | 355625600.74   | 1030045747.04  | 3528411522.02   | 0.58 | 2604.97  | 8409.30  | 22104.15  | 68496.31  |
| 0.18 | 64296381.25   | 232611361.68   | 658927418.09   | 2198685747.05   | 0.59 | 2112.71  | 6780.27  | 17999.83  | 54330.38  |
| 0.19 | 44748989.27   | 161306926.62   | 451521332.79   | 1532464720.75   | 0.60 | 1712.39  | 5452.51  | 14349.14  | 44589.38  |
| 0.20 | 31016232.15   | 111716219.01   | 318405213.32   | 1035331581.20   | 0.61 | 1394.89  | 4395.08  | 11495.05  | 36288.07  |
| 0.21 | 22102571.42   | 80395918.13    | 228159595.57   | 732330241.43    | 0.62 | 1122.78  | 3551.75  | 9293.52   | 29232.80  |
| 0.22 | 16040460.49   | 57956184.36    | 165233927.03   | 521513530.00    | 0.63 | 921.20   | 2876.32  | 7563.23   | 22265.30  |
| 0.23 | 11508860.75   | 42419818.62    | 119798974.23   | 373354944.10    | 0.64 | 750.75   | 2323.72  | 6073.13   | 17689.65  |
| 0.24 | 8478940.04    | 30501685.65    | 87913054.06    | 268385303.06    | 0.65 | 618.35   | 1852.29  | 4790.16   | 14022.83  |
| 0.25 | 6236077.32    | 21973352.81    | 64376473.85    | 199400715.83    | 0.66 | 501.48   | 1505.85  | 3911.39   | 11606.27  |
| 0.26 | 4500483.68    | 16410426.40    | 47413970.99    | 146973300.23    | 0.67 | 400.25   | 1181.32  | 3139.68   | 8892.83   |
| 0.27 | 3320033.27    | 12070631.29    | 35418969.26    | 106546928.48    | 0.68 | 320.21   | 949.45   | 2517.80   | 7233.08   |
| 0.28 | 2510884.65    | 9135262.02     | 26081552.52    | 80615745.98     | 0.69 | 261.49   | 762.06   | 1945.58   | 5554.83   |
| 0.29 | 1891033.95    | 6910777.08     | 19778756.73    | 64540740.53     | 0.70 | 209.50   | 601.26   | 1502.33   | 4409.89   |
| 0.30 | 1432930.32    | 5169273.92     | 14371985.80    | 47932982.18     | 0.71 | 170.41   | 477.65   | 1206.18   | 3520.48   |
| 0.31 | 1101928.45    | 4008268.46     | 11377477.81    | 35730400.74     | 0.72 | 136.90   | 374.07   | 957.80    | 2758.93   |
| 0.32 | 835895.29     | 3101202.80     | 8887452.41     | 27867559.81     | 0.73 | 110.26   | 299.82   | 749.19    | 2140.21   |
| 0.33 | 646371.97     | 2389109.45     | 6884799.25     | 21673826.38     | 0.74 | 87.96    | 233.87   | 592.11    | 1660.52   |
| 0.34 | 513848.85     | 1817768.72     | 5334298.72     | 16556530.89     | 0.75 | 70.30    | 182.06   | 457.64    | 1298.20   |
| 0.35 | 395487.72     | 1432248.39     | 4096539.25     | 13276387.48     | 0.76 | 56.59    | 144.42   | 354.64    | 973.71    |
| 0.36 | 311252.37     | 1113476.73     | 3233721.46     | 10385497.82     | 0.77 | 44.58    | 112.46   | 271.79    | 742.32    |
| 0.37 | 243404.19     | 874188.08      | 2585880.41     | 8096053.48      | 0.78 | 35.65    | 85.83    | 201.76    | 550.28    |
| 0.38 | 196305.45     | 679678.82      | 2001999.54     | 6232992.45      | 0.79 | 28.47    | 66.54    | 153.61    | 419.47    |
| 0.39 | 155760.39     | 547571.85      | 1558426.37     | 4908022.50      | 0.80 | 22.32    | 51.95    | 117.07    | 314.39    |
| 0.40 | 121520.52     | 431208.51      | 1237031.04     | 3900108.73      | 0.81 | 17.83    | 40.13    | 89.74     | 235.64    |
| 0.41 | 97107.06      | 344034.40      | 966921.77      | 3133184.52      | 0.82 | 14.04    | 30.98    | 67.08     | 171.36    |
| 0.42 | 77277.03      | 267829.05      | 754453.94      | 2447295.60      | 0.83 | 10.91    | 22.86    | 51.11     | 127.18    |
| 0.43 | 60667.73      | 217042.13      | 622592.37      | 1904360.10      | 0.84 | 8.48     | 17.35    | 36.38     | 93.54     |
| 0.44 | 48231.61      | 170537.99      | 495042.73      | 1521518.80      | 0.85 | 6.46     | 13.10    | 27.07     | 64.75     |
| 0.45 | 39374.88      | 136979.09      | 393718.74      | 1200840.61      | 0.86 | 4.98     | 9.80     | 19.25     | 44.78     |
| 0.46 | 31976.80      | 112064.46      | 317768.31      | 990584.16       | 0.87 | 3.82     | 7.17     | 13.59     | 33.34     |
| 0.47 | 25954.17      | 90064.24       | 253528.71      | 807085.58       | 0.88 | 2.86     | 5.20     | 9.59      | 21.66     |
| 0.48 | 21115.04      | 72500.02       | 200474.25      | 627884.84       | 0.89 | 2.17     | 3.79     | 6.65      | 14.31     |
| 0.49 | 17262.22      | 58467.71       | 165003.51      | 484817.40       | 0.90 | 1.65     | 2.75     | 4.62      | 9.56      |
| 0.50 | 13929.14      | 45866.84       | 130676.40      | 387751.48       |      |          |          |           |           |

Table S442: Critical values for detector  $\hat{H}_{mov,sn}^{m,0.3}$  with windows size  $n = 0.3$ , and FM-OLS and D-OLS estimation in a model with intercept. The number of integrated regressors is 4 and the highest power of  $x_{kt}$  is 3.

| m    | 90 %           | 95 %            | 97,5 %          | 99 %             | m    | 90 %     | 95 %      | 97,5 %    | 99 %       |
|------|----------------|-----------------|-----------------|------------------|------|----------|-----------|-----------|------------|
| 0.10 | 30113764909.97 | 115764464249.01 | 352961159695.18 | 1291952887598.73 | 0.51 | 92488.36 | 325148.20 | 961566.46 | 3074907.96 |
| 0.11 | 16012930240.89 | 60052285301.38  | 186861120817.73 | 674293605601.67  | 0.52 | 75633.64 | 265072.61 | 773278.40 | 2460233.30 |
| 0.12 | 9067028014.35  | 35116900587.91  | 104767637586.70 | 367785543960.67  | 0.53 | 60654.58 | 212792.90 | 612331.03 | 1948283.85 |
| 0.13 | 5258151009.16  | 20323722448.47  | 63230057291.32  | 240580480206.54  | 0.54 | 48977.70 | 172156.45 | 485604.71 | 1580194.23 |
| 0.14 | 3246260040.09  | 12826334614.75  | 39778386760.08  | 138655493720.17  | 0.55 | 40075.30 | 138900.32 | 389863.12 | 1240133.52 |
| 0.15 | 1991815118.22  | 7807338774.67   | 24870143717.90  | 85374031589.53   | 0.56 | 32061.78 | 111455.87 | 324015.43 | 1034547.94 |
| 0.16 | 1307783468.25  | 4944626341.57   | 16064987298.70  | 54017358538.10   | 0.57 | 25879.91 | 90606.12  | 260823.53 | 833985.55  |
| 0.17 | 861485939.48   | 3290854066.43   | 10597509133.29  | 36052925369.27   | 0.58 | 20693.09 | 73235.04  | 206963.80 | 666299.00  |
| 0.18 | 567724980.02   | 2213554844.54   | 6815863423.17   | 23488063638.79   | 0.59 | 16863.43 | 59464.50  | 168505.33 | 533327.96  |
| 0.19 | 385405865.26   | 1471355715.48   | 4611657916.90   | 15647230986.60   | 0.60 | 13497.30 | 48215.35  | 137918.96 | 429241.30  |
| 0.20 | 265354659.46   | 1030746913.88   | 3190326302.72   | 11155873198.42   | 0.61 | 10925.26 | 38791.60  | 112072.96 | 345182.64  |
| 0.21 | 183747223.03   | 723198339.82    | 2274737476.08   | 7916386815.75    | 0.62 | 8848.17  | 31072.11  | 89135.51  | 275366.56  |
| 0.22 | 132937287.01   | 499536393.88    | 1543047806.04   | 5480461719.06    | 0.63 | 7217.98  | 24489.94  | 69771.23  | 219787.46  |
| 0.23 | 95712161.49    | 358283009.26    | 1096575488.15   | 3931883918.38    | 0.64 | 5863.36  | 19837.75  | 56030.65  | 175907.43  |
| 0.24 | 68969792.29    | 259684536.06    | 792589272.34    | 2829610620.01    | 0.65 | 4718.88  | 15764.90  | 44361.73  | 143860.61  |
| 0.25 | 49055206.42    | 186756701.14    | 583908052.23    | 2057328472.43    | 0.66 | 3797.19  | 12647.67  | 35817.20  | 114742.68  |
| 0.26 | 35936948.50    | 138340242.36    | 413254957.09    | 1431046419.22    | 0.67 | 3079.16  | 10297.05  | 27839.87  | 89371.92   |
| 0.27 | 27148965.64    | 105538507.88    | 303993185.32    | 1090839524.71    | 0.68 | 2422.13  | 8147.61   | 22357.26  | 70336.95   |
| 0.28 | 20997449.16    | 79128851.89     | 236982612.45    | 834345384.03     | 0.69 | 1971.58  | 6415.38   | 17875.82  | 54530.69   |
| 0.29 | 16040511.29    | 61055958.91     | 183239781.43    | 623687138.57     | 0.70 | 1610.45  | 5142.22   | 13943.15  | 41819.25   |
| 0.30 | 12036053.95    | 45421912.02     | 138491312.95    | 466730435.21     | 0.71 | 1283.09  | 3992.83   | 10772.28  | 33340.55   |
| 0.31 | 9164813.27     | 34113941.57     | 104952165.73    | 346239541.17     | 0.72 | 1002.58  | 3166.36   | 8383.70   | 26004.94   |
| 0.32 | 7178264.22     | 26702175.44     | 82051363.80     | 267286440.43     | 0.73 | 794.02   | 2540.63   | 6638.31   | 20088.14   |
| 0.33 | 5605237.52     | 20886222.13     | 64158109.39     | 209082613.26     | 0.74 | 622.10   | 1960.37   | 5193.54   | 15603.16   |
| 0.34 | 4270068.77     | 16385995.61     | 51084076.98     | 163871591.20     | 0.75 | 495.21   | 1523.92   | 4096.19   | 11994.74   |
| 0.35 | 3298353.84     | 12604974.26     | 37724081.28     | 127743977.32     | 0.76 | 389.79   | 1170.27   | 3102.33   | 9109.44    |
| 0.36 | 2583860.71     | 9937481.22      | 29959469.85     | 100166667.01     | 0.77 | 307.14   | 895.08    | 2332.25   | 6813.95    |
| 0.37 | 2005866.31     | 7856205.54      | 23000668.62     | 80110770.03      | 0.78 | 241.04   | 685.60    | 1769.93   | 5204.71    |
| 0.38 | 1609888.82     | 6129581.77      | 17783664.85     | 62933178.65      | 0.79 | 189.53   | 529.71    | 1325.42   | 3947.87    |
| 0.39 | 1269482.15     | 4761846.21      | 14160132.06     | 49507355.52      | 0.80 | 146.47   | 399.77    | 1020.11   | 2883.72    |
| 0.40 | 1011587.52     | 3750038.57      | 11282565.96     | 38335913.41      | 0.81 | 114.11   | 304.66    | 771.28    | 2197.43    |
| 0.41 | 790901.06      | 2952296.95      | 9021597.51      | 30999747.76      | 0.82 | 88.41    | 230.45    | 573.45    | 1634.90    |
| 0.42 | 622858.74      | 2320861.62      | 7140827.83      | 24042496.41      | 0.83 | 68.35    | 170.83    | 420.46    | 1185.43    |
| 0.43 | 490934.82      | 1847578.38      | 5555271.43      | 18850781.44      | 0.84 | 52.12    | 126.31    | 306.09    | 860.68     |
| 0.44 | 397483.48      | 1452622.28      | 4337536.17      | 14759102.06      | 0.85 | 39.34    | 92.94     | 223.87    | 597.45     |
| 0.45 | 316469.00      | 1168451.44      | 3532728.34      | 11780171.00      | 0.86 | 29.99    | 67.87     | 157.01    | 416.89     |
| 0.46 | 260719.35      | 947389.55       | 2844197.11      | 9400537.62       | 0.87 | 22.58    | 49.48     | 109.71    | 287.64     |
| 0.47 | 210253.06      | 760071.87       | 2237298.48      | 7565335.39       | 0.88 | 16.82    | 35.41     | 75.78     | 194.63     |
| 0.48 | 172044.39      | 616151.68       | 1766378.58      | 6023924.43       | 0.89 | 12.43    | 25.00     | 52.45     | 129.45     |
| 0.49 | 140168.14      | 500033.48       | 1441097.44      | 4729508.32       | 0.90 | 9.01     | 17.26     | 34.45     | 81.43      |
| 0.50 | 114069.45      | 402650.07       | 1186128.16      | 3768662.61       |      |          |           |           |            |

Table S443: Critical values for detector  $\hat{H}_{mov,sn}^{m,0.3}$  with windows size  $n = 0.3$ , and IM-OLS estimation in a model with intercept. The number of integrated regressors is 4 and the highest power of  $x_{kt}$  is 3.

| m    | 90 %          | 95 %           | 97,5 %         | 99 %            | m    | 90 %     | 95 %     | 97,5 %    | 99 %      |
|------|---------------|----------------|----------------|-----------------|------|----------|----------|-----------|-----------|
| 0.10 | 4850713800.88 | 16145095555.41 | 43514999890.62 | 135701938054.12 | 0.51 | 12574.09 | 40773.46 | 113743.34 | 338839.12 |
| 0.11 | 2571583342.51 | 8531422217.42  | 23503410414.23 | 70843759276.35  | 0.52 | 10271.12 | 33401.57 | 91712.34  | 266810.38 |
| 0.12 | 1409561590.91 | 4709786266.05  | 12996097249.09 | 38989268370.50  | 0.53 | 8492.17  | 26963.02 | 75332.39  | 223827.97 |
| 0.13 | 821829865.77  | 2705169521.12  | 7379088378.03  | 22224283305.23  | 0.54 | 7086.74  | 22547.38 | 60713.98  | 183274.92 |
| 0.14 | 492378948.96  | 1603350980.91  | 4355575157.90  | 13420644106.34  | 0.55 | 5648.34  | 17800.80 | 47730.60  | 148851.57 |
| 0.15 | 297546450.24  | 991024741.77   | 2801823968.91  | 8580357693.37   | 0.56 | 4657.06  | 14606.10 | 38526.81  | 117918.42 |
| 0.16 | 189753189.87  | 632341860.37   | 1747952011.73  | 5327021341.26   | 0.57 | 3829.70  | 11732.03 | 30586.29  | 95995.71  |
| 0.17 | 122753379.35  | 400606252.78   | 1114144358.94  | 3409234812.36   | 0.58 | 3130.42  | 9425.53  | 24745.84  | 76700.95  |
| 0.18 | 78955730.54   | 263882491.22   | 732923912.15   | 2168463998.14   | 0.59 | 2595.08  | 7709.32  | 20004.69  | 61453.24  |
| 0.19 | 53892448.47   | 178219813.69   | 486538119.80   | 1498754897.07   | 0.60 | 2125.19  | 6243.24  | 16009.28  | 49844.93  |
| 0.20 | 37732686.93   | 125983855.59   | 333928323.13   | 1056901135.61   | 0.61 | 1735.06  | 5061.20  | 13188.73  | 38690.02  |
| 0.21 | 25715359.90   | 88017647.75    | 237596930.26   | 742434520.79    | 0.62 | 1412.34  | 4110.12  | 10679.40  | 32325.10  |
| 0.22 | 18438956.63   | 61911145.79    | 169936767.34   | 516949120.66    | 0.63 | 1168.02  | 3313.44  | 8722.34   | 25501.19  |
| 0.23 | 13218607.34   | 44337868.49    | 123014314.21   | 374114963.71    | 0.64 | 951.17   | 2681.85  | 7096.17   | 20669.15  |
| 0.24 | 9818417.30    | 32385843.29    | 88303719.02    | 263285920.09    | 0.65 | 783.57   | 2201.22  | 5708.13   | 16997.78  |
| 0.25 | 7089680.35    | 23334692.21    | 65242127.27    | 196507053.37    | 0.66 | 648.85   | 1806.35  | 4645.09   | 13581.04  |
| 0.26 | 5218500.45    | 17241260.06    | 46722263.27    | 143255785.41    | 0.67 | 531.96   | 1447.88  | 3662.90   | 10949.47  |
| 0.27 | 3829716.42    | 12820635.04    | 34779310.54    | 108869388.97    | 0.68 | 435.06   | 1160.41  | 2980.05   | 9070.34   |
| 0.28 | 2828242.40    | 9644838.04     | 26157032.70    | 78251305.17     | 0.69 | 358.15   | 949.93   | 2340.87   | 6960.76   |
| 0.29 | 2121329.09    | 7204293.54     | 20138341.84    | 60651654.70     | 0.70 | 291.73   | 765.78   | 1879.89   | 5613.55   |
| 0.30 | 1603380.13    | 5484731.47     | 14750330.46    | 45019678.39     | 0.71 | 237.48   | 613.43   | 1494.82   | 4486.50   |
| 0.31 | 1233833.48    | 4160999.64     | 11582929.97    | 34348600.56     | 0.72 | 192.01   | 489.83   | 1204.05   | 3588.17   |
| 0.32 | 931120.05     | 3179796.23     | 8914035.09     | 26595252.56     | 0.73 | 157.58   | 392.66   | 967.03    | 2654.08   |
| 0.33 | 720347.38     | 2495591.10     | 6934435.07     | 20320305.54     | 0.74 | 128.66   | 313.81   | 751.70    | 2098.41   |
| 0.34 | 557390.68     | 1866911.33     | 5393996.72     | 15653085.50     | 0.75 | 104.59   | 249.39   | 588.72    | 1637.28   |
| 0.35 | 439482.20     | 1489827.90     | 4160245.04     | 12413737.27     | 0.76 | 84.61    | 200.89   | 461.91    | 1285.18   |
| 0.36 | 344483.06     | 1157899.71     | 3240918.00     | 9640481.33      | 0.77 | 67.72    | 154.28   | 359.82    | 974.66    |
| 0.37 | 271017.37     | 904233.82      | 2588021.78     | 7709964.28      | 0.78 | 53.88    | 119.46   | 272.94    | 739.69    |
| 0.38 | 212190.76     | 718976.23      | 2000293.50     | 6083001.88      | 0.79 | 43.81    | 93.28    | 208.37    | 567.98    |
| 0.39 | 168049.42     | 577361.04      | 1567882.23     | 4751588.81      | 0.80 | 34.77    | 72.70    | 159.31    | 432.57    |
| 0.40 | 130829.73     | 452788.76      | 1269881.90     | 3826080.69      | 0.81 | 27.65    | 57.61    | 121.96    | 322.83    |
| 0.41 | 106145.23     | 363071.52      | 989611.29      | 2981848.04      | 0.82 | 21.87    | 44.63    | 94.25     | 240.07    |
| 0.42 | 83270.46      | 281430.84      | 782780.20      | 2423388.93      | 0.83 | 17.13    | 34.01    | 70.98     | 179.97    |
| 0.43 | 66700.24      | 226225.86      | 643875.43      | 1938791.14      | 0.84 | 13.36    | 25.50    | 51.01     | 125.62    |
| 0.44 | 53110.59      | 176958.93      | 502988.67      | 1526810.34      | 0.85 | 10.21    | 19.78    | 38.27     | 90.27     |
| 0.45 | 43352.61      | 142755.30      | 413818.74      | 1266183.15      | 0.86 | 7.81     | 14.64    | 27.27     | 60.92     |
| 0.46 | 34971.61      | 117800.59      | 321463.64      | 992183.82       | 0.87 | 5.82     | 10.73    | 19.72     | 45.16     |
| 0.47 | 28408.87      | 94741.71       | 262943.03      | 814281.36       | 0.88 | 4.28     | 7.62     | 13.77     | 30.76     |
| 0.48 | 23167.78      | 77405.45       | 217002.02      | 654520.82       | 0.89 | 3.13     | 5.44     | 9.42      | 19.84     |
| 0.49 | 19219.21      | 64096.81       | 169556.83      | 528360.00       | 0.90 | 2.26     | 3.86     | 6.49      | 13.19     |
| 0.50 | 15494.39      | 50279.57       | 137751.98      | 411423.17       |      |          |          |           |           |

Table S444: Critical values for detector  $\hat{H}_{mov,sn}^{m,0.1}$  with windows size  $n = 0.1$ , and FM-OLS and D-OLS estimation in a model with intercept and linear trend. The number of integrated regressors is 4 and the highest power of  $x_{kt}$  is 3.

| m    | 90 %           | 95 %            | 97,5 %          | 99 %             | m    | 90 %     | 95 %      | 97,5 %    | 99 %       |
|------|----------------|-----------------|-----------------|------------------|------|----------|-----------|-----------|------------|
| 0.10 | 32978830780.42 | 113616198937.55 | 328378003239.62 | 1110819398064.08 | 0.51 | 77038.61 | 269045.52 | 769683.68 | 2462274.87 |
| 0.11 | 16895034159.51 | 60659256246.44  | 174079762521.99 | 561962763140.09  | 0.52 | 63677.88 | 221694.72 | 619651.03 | 2088204.22 |
| 0.12 | 9490806813.24  | 32561383780.68  | 97059220147.76  | 305743023529.19  | 0.53 | 51316.67 | 179918.19 | 509871.45 | 1655866.79 |
| 0.13 | 5468359310.58  | 19005244356.17  | 56074495404.58  | 186850388137.80  | 0.54 | 42132.35 | 143022.11 | 415602.25 | 1300547.95 |
| 0.14 | 3232713677.14  | 11700368475.38  | 34048994761.27  | 112829103043.11  | 0.55 | 34514.86 | 117203.50 | 334440.59 | 1082793.25 |
| 0.15 | 1966094601.04  | 7013853884.74   | 20584607642.25  | 68581711663.78   | 0.56 | 28036.92 | 95991.19  | 275314.53 | 905478.65  |
| 0.16 | 1232218958.40  | 4455733833.99   | 13119413212.32  | 42510205586.01   | 0.57 | 22752.51 | 79442.20  | 223380.82 | 721466.79  |
| 0.17 | 823796239.04   | 2916307383.85   | 8518087364.86   | 27215079498.22   | 0.58 | 18681.86 | 63840.92  | 180435.62 | 573539.93  |
| 0.18 | 539333083.31   | 1950199641.36   | 5436480275.51   | 17297300372.52   | 0.59 | 15183.26 | 51939.35  | 148279.22 | 474182.73  |
| 0.19 | 360392254.72   | 1315257987.52   | 3692355662.56   | 11903450946.04   | 0.60 | 12257.68 | 41662.26  | 120428.75 | 379228.77  |
| 0.20 | 247574167.33   | 875696103.51    | 2559420347.98   | 8840675738.65    | 0.61 | 10038.77 | 34049.80  | 98537.13  | 311469.16  |
| 0.21 | 169109673.96   | 610949829.23    | 1822550707.75   | 6010735103.90    | 0.62 | 8216.68  | 27237.30  | 77985.27  | 243869.54  |
| 0.22 | 117634198.65   | 418412874.43    | 1256473985.61   | 4123567915.24    | 0.63 | 6718.16  | 21690.13  | 61168.90  | 196478.60  |
| 0.23 | 84765751.94    | 302206878.71    | 880462861.63    | 2879511360.56    | 0.64 | 5526.82  | 17571.31  | 49667.55  | 155017.01  |
| 0.24 | 60443681.14    | 218323411.54    | 638754799.58    | 2195939578.81    | 0.65 | 4560.17  | 14284.64  | 39363.70  | 124781.55  |
| 0.25 | 43053725.79    | 153484267.45    | 451360190.20    | 1563051011.70    | 0.66 | 3684.93  | 11506.85  | 31277.53  | 100115.34  |
| 0.26 | 31504346.27    | 113864130.12    | 328839990.49    | 1098204405.58    | 0.67 | 3024.42  | 9326.16   | 25493.09  | 79954.15   |
| 0.27 | 23871239.10    | 84049862.67     | 244877427.47    | 817435447.09     | 0.68 | 2483.08  | 7641.52   | 20510.77  | 63047.99   |
| 0.28 | 17872116.75    | 63775346.70     | 183981499.26    | 594330638.76     | 0.69 | 2002.75  | 6255.89   | 16866.02  | 50014.91   |
| 0.29 | 13718781.82    | 48198941.67     | 137745255.59    | 436881209.33     | 0.70 | 1645.25  | 5051.31   | 13265.85  | 39862.83   |
| 0.30 | 10267682.39    | 36721727.74     | 105182274.74    | 329638352.01     | 0.71 | 1318.15  | 3945.67   | 10388.03  | 32560.26   |
| 0.31 | 7765220.86     | 28136123.04     | 79065155.31     | 254228317.15     | 0.72 | 1041.37  | 3165.98   | 8231.45   | 25720.15   |
| 0.32 | 6007870.05     | 21701134.04     | 62252976.98     | 199376610.34     | 0.73 | 851.95   | 2502.98   | 6472.46   | 19535.06   |
| 0.33 | 4659691.92     | 16552275.54     | 48394163.47     | 156101360.47     | 0.74 | 682.64   | 1981.68   | 5180.88   | 15211.17   |
| 0.34 | 3617357.12     | 13212236.97     | 38593969.34     | 120038427.55     | 0.75 | 549.93   | 1551.72   | 4105.79   | 11925.33   |
| 0.35 | 2798968.33     | 10325827.14     | 29527438.40     | 93437413.31      | 0.76 | 440.67   | 1204.44   | 3145.25   | 9368.36    |
| 0.36 | 2186793.91     | 7944258.77      | 23280137.60     | 73211582.06      | 0.77 | 350.70   | 926.70    | 2475.09   | 7169.19    |
| 0.37 | 1726643.74     | 6189695.43      | 18353776.86     | 58375131.34      | 0.78 | 278.33   | 718.84    | 1869.40   | 5421.20    |
| 0.38 | 1345362.71     | 4790654.14      | 13671063.15     | 46890893.42      | 0.79 | 223.27   | 564.14    | 1426.29   | 4131.39    |
| 0.39 | 1049480.66     | 3712514.89      | 10684701.85     | 36175822.52      | 0.80 | 175.64   | 436.12    | 1093.64   | 3164.42    |
| 0.40 | 824669.88      | 2943921.11      | 8566989.53      | 27982353.00      | 0.81 | 139.03   | 336.00    | 827.64    | 2373.79    |
| 0.41 | 653076.04      | 2321946.50      | 6876826.82      | 22746275.19      | 0.82 | 109.39   | 257.95    | 614.59    | 1759.02    |
| 0.42 | 514819.82      | 1859106.79      | 5386760.19      | 18097245.86      | 0.83 | 85.22    | 194.20    | 452.82    | 1274.70    |
| 0.43 | 406941.71      | 1490545.91      | 4272517.67      | 14380497.08      | 0.84 | 65.27    | 144.37    | 332.19    | 896.79     |
| 0.44 | 327232.73      | 1184949.47      | 3368948.57      | 11414117.23      | 0.85 | 49.59    | 106.79    | 242.26    | 640.82     |
| 0.45 | 264856.22      | 942054.11       | 2737246.35      | 9072884.78       | 0.86 | 37.93    | 80.07     | 169.99    | 449.31     |
| 0.46 | 214845.21      | 769424.79       | 2211336.50      | 7365579.01       | 0.87 | 28.62    | 57.65     | 122.48    | 311.25     |
| 0.47 | 175952.30      | 619199.44       | 1790450.22      | 5772108.36       | 0.88 | 21.17    | 41.41     | 86.34     | 210.55     |
| 0.48 | 143995.27      | 506842.36       | 1409797.98      | 4577394.78       | 0.89 | 15.39    | 29.08     | 58.68     | 142.24     |
| 0.49 | 115655.49      | 406671.79       | 1152485.85      | 3700054.42       | 0.90 | 11.04    | 20.37     | 38.41     | 93.63      |
| 0.50 | 95466.50       | 333097.78       | 949626.19       | 3082496.34       |      |          |           |           |            |

Table S445: Critical values for detector  $\hat{H}_{mov,sn}^{m,0.1}$  with windows size  $n = 0.1$ , and IM-OLS estimation in a model with intercept and linear trend. The number of integrated regressors is 4 and the highest power of  $x_{kt}$  is 3.

| m    | 90 %          | 95 %           | 97,5 %         | 99 %            | m    | 90 %     | 95 %     | 97,5 %    | 99 %      |
|------|---------------|----------------|----------------|-----------------|------|----------|----------|-----------|-----------|
| 0.10 | 6342083284.10 | 21739296573.78 | 59314242082.86 | 188200109220.25 | 0.51 | 16575.41 | 53375.09 | 148035.25 | 432095.58 |
| 0.11 | 3411269719.88 | 11527178386.60 | 31862380790.65 | 96921188328.83  | 0.52 | 13578.03 | 43631.26 | 118013.08 | 345915.72 |
| 0.12 | 1869031938.99 | 6388182706.40  | 17871562911.84 | 54142105495.05  | 0.53 | 11117.62 | 35726.03 | 97722.07  | 288736.47 |
| 0.13 | 1098819275.23 | 3680859382.95  | 10174155529.45 | 31191501272.07  | 0.54 | 9220.21  | 29428.87 | 78071.43  | 232973.78 |
| 0.14 | 654304930.53  | 2168632473.68  | 6043746251.23  | 18588065058.10  | 0.55 | 7400.34  | 22993.65 | 61520.59  | 187559.76 |
| 0.15 | 396267862.17  | 1347720138.99  | 3843938754.69  | 12018786618.44  | 0.56 | 6078.90  | 18679.31 | 49087.66  | 149648.14 |
| 0.16 | 254467848.83  | 861901884.71   | 2422871121.26  | 7577422290.11   | 0.57 | 4983.17  | 15011.64 | 38940.85  | 119660.15 |
| 0.17 | 164630759.68  | 548322093.54   | 1526657531.95  | 4768130441.24   | 0.58 | 4056.56  | 11930.88 | 31136.78  | 95104.65  |
| 0.18 | 105966176.68  | 358825939.98   | 1009805599.01  | 3029560655.81   | 0.59 | 3311.61  | 9741.81  | 25078.15  | 76826.08  |
| 0.19 | 72580604.07   | 242714776.30   | 667108082.78   | 2108873502.09   | 0.60 | 2715.14  | 7857.07  | 20019.27  | 61797.26  |
| 0.20 | 50770090.24   | 170754517.46   | 461298838.83   | 1477541716.46   | 0.61 | 2227.29  | 6352.21  | 16333.31  | 47809.99  |
| 0.21 | 35082530.83   | 120429519.13   | 331539632.10   | 1035293441.48   | 0.62 | 1802.15  | 5154.21  | 13222.06  | 39462.55  |
| 0.22 | 24911226.74   | 84831561.57    | 235488287.80   | 732559022.36    | 0.63 | 1476.09  | 4110.77  | 10692.32  | 31356.75  |
| 0.23 | 18055796.01   | 61198986.17    | 169914882.14   | 520402405.46    | 0.64 | 1198.43  | 3284.01  | 8592.70   | 24911.52  |
| 0.24 | 13249497.20   | 44653882.16    | 123132292.99   | 364507168.40    | 0.65 | 980.85   | 2707.74  | 6881.41   | 20272.61  |
| 0.25 | 9601879.53    | 32246529.75    | 90037974.67    | 270379959.75    | 0.66 | 807.43   | 2213.99  | 5628.24   | 16191.75  |
| 0.26 | 7092790.09    | 23754013.32    | 65232523.94    | 202618848.71    | 0.67 | 654.17   | 1751.72  | 4365.43   | 12814.24  |
| 0.27 | 5196125.04    | 17561604.22    | 48472988.64    | 149340278.47    | 0.68 | 536.61   | 1391.17  | 3499.90   | 10643.76  |
| 0.28 | 3851477.62    | 13309380.41    | 36034943.65    | 108026310.39    | 0.69 | 438.01   | 1125.67  | 2733.21   | 8062.52   |
| 0.29 | 2891862.58    | 9867088.86     | 27648363.50    | 84919089.17     | 0.70 | 353.13   | 905.09   | 2175.93   | 6369.34   |
| 0.30 | 2158030.34    | 7525989.80     | 20406695.89    | 62032524.23     | 0.71 | 283.99   | 716.42   | 1723.73   | 5067.98   |
| 0.31 | 1667615.69    | 5691825.29     | 15865138.53    | 47605916.66     | 0.72 | 228.20   | 570.19   | 1374.01   | 4006.51   |
| 0.32 | 1260893.17    | 4317671.08     | 12277552.68    | 36879148.56     | 0.73 | 185.98   | 452.85   | 1081.86   | 2982.60   |
| 0.33 | 973431.08     | 3399889.15     | 9569915.88     | 27997566.99     | 0.74 | 150.23   | 357.81   | 837.10    | 2312.67   |
| 0.34 | 754526.63     | 2552030.42     | 7359574.04     | 21687155.47     | 0.75 | 120.80   | 281.64   | 653.72    | 1785.49   |
| 0.35 | 593118.89     | 2044186.86     | 5659185.07     | 17343751.10     | 0.76 | 96.74    | 223.95   | 511.68    | 1381.16   |
| 0.36 | 463181.28     | 1580461.63     | 4422200.98     | 13608507.04     | 0.77 | 76.66    | 171.32   | 389.33    | 1043.89   |
| 0.37 | 363692.90     | 1228174.09     | 3535381.67     | 10974131.47     | 0.78 | 60.35    | 131.40   | 296.28    | 788.76    |
| 0.38 | 287568.20     | 979325.36      | 2709623.61     | 8332924.82      | 0.79 | 48.42    | 101.91   | 224.42    | 598.10    |
| 0.39 | 227010.48     | 779727.66      | 2114071.87     | 6549255.29      | 0.80 | 37.89    | 77.88    | 169.71    | 451.31    |
| 0.40 | 176193.15     | 615147.65      | 1709556.24     | 5238698.84      | 0.81 | 29.81    | 61.37    | 127.93    | 336.17    |
| 0.41 | 142305.80     | 485135.90      | 1345450.11     | 4035909.54      | 0.82 | 23.34    | 47.05    | 97.34     | 246.95    |
| 0.42 | 112478.07     | 378547.87      | 1053221.97     | 3269840.77      | 0.83 | 18.06    | 35.36    | 72.95     | 183.35    |
| 0.43 | 89239.40      | 302348.79      | 856147.90      | 2600010.81      | 0.84 | 13.95    | 26.46    | 52.49     | 128.20    |
| 0.44 | 71023.74      | 236891.64      | 676348.51      | 2031672.51      | 0.85 | 10.55    | 20.24    | 38.94     | 91.05     |
| 0.45 | 57909.54      | 190443.61      | 544740.86      | 1682642.69      | 0.86 | 8.03     | 14.89    | 27.63     | 61.61     |
| 0.46 | 46846.22      | 156382.82      | 436103.93      | 1315525.36      | 0.87 | 5.96     | 10.90    | 19.93     | 45.41     |
| 0.47 | 37594.68      | 125509.95      | 350664.65      | 1075094.86      | 0.88 | 4.38     | 7.72     | 13.88     | 30.82     |
| 0.48 | 30564.67      | 102143.66      | 286062.84      | 868503.34       | 0.89 | 3.22     | 5.52     | 9.51      | 19.93     |
| 0.49 | 25431.01      | 84285.75       | 223078.45      | 697822.84       | 0.90 | 2.36     | 3.95     | 6.57      | 13.26     |
| 0.50 | 20347.75      | 65755.73       | 183056.46      | 538381.82       |      |          |          |           |           |

Table S446: Critical values for detector  $\hat{H}_{mov,sn}^{m,0.2}$  with windows size  $n = 0.2$ , and FM-OLS and D-OLS estimation in a model with intercept and linear trend. The number of integrated regressors is 4 and the highest power of  $x_{kt}$  is 3.

| m    | 90 %           | 95 %            | 97.5 %          | 99 %             | m    | 90 %      | 95 %      | 97.5 %     | 99 %       |
|------|----------------|-----------------|-----------------|------------------|------|-----------|-----------|------------|------------|
| 0.10 | 43233282725.63 | 153013709814.95 | 447678289752.38 | 1532333883791.61 | 0.51 | 101108.95 | 349570.28 | 1001259.27 | 3195166.91 |
| 0.11 | 22236598986.25 | 81214897845.45  | 237937528549.90 | 771200317798.75  | 0.52 | 83165.85  | 287737.23 | 808464.87  | 2654768.35 |
| 0.12 | 12542079994.62 | 43790539547.53  | 134359198579.05 | 426218862677.68  | 0.53 | 67348.23  | 231648.74 | 660618.00  | 2082097.85 |
| 0.13 | 7193799818.94  | 25424530531.82  | 77087123320.85  | 261643845169.23  | 0.54 | 54459.03  | 183691.11 | 533862.65  | 1637105.90 |
| 0.14 | 4317334331.69  | 15852448010.22  | 46636015834.37  | 155961718054.33  | 0.55 | 44752.09  | 149842.02 | 428382.38  | 1365868.38 |
| 0.15 | 2610960274.03  | 9577115012.79   | 27906147037.51  | 95937583464.96   | 0.56 | 36107.76  | 121468.35 | 350001.21  | 1144808.90 |
| 0.16 | 1644575240.64  | 5986033816.96   | 18040138268.80  | 59238645653.85   | 0.57 | 29350.68  | 100175.89 | 283178.39  | 905610.37  |
| 0.17 | 1102185011.14  | 3961251577.71   | 11845285056.05  | 37940178166.35   | 0.58 | 23780.64  | 79877.93  | 225497.62  | 725975.43  |
| 0.18 | 722126747.61   | 2665226926.74   | 7538379276.46   | 24207781943.78   | 0.59 | 19338.93  | 65379.10  | 185904.86  | 575621.24  |
| 0.19 | 485724879.82   | 1804071968.28   | 5095019441.65   | 16909017442.95   | 0.60 | 15601.85  | 52275.20  | 150529.06  | 473405.06  |
| 0.20 | 332595892.72   | 1202293585.24   | 3534059824.04   | 12233599205.19   | 0.61 | 12596.95  | 42288.56  | 121203.56  | 383756.87  |
| 0.21 | 227774358.18   | 834685009.88    | 2522012739.24   | 8402735880.47    | 0.62 | 10322.27  | 33834.24  | 94861.64   | 303183.11  |
| 0.22 | 158856732.29   | 575172402.29    | 1741534402.05   | 5665399685.28    | 0.63 | 8421.91   | 26962.07  | 74972.30   | 242722.57  |
| 0.23 | 113909579.92   | 410495739.40    | 1218875849.63   | 3997776832.16    | 0.64 | 6909.28   | 21541.92  | 60632.45   | 189052.13  |
| 0.24 | 81555662.63    | 298140575.35    | 882179154.59    | 3073524658.77    | 0.65 | 5631.06   | 17362.83  | 47543.20   | 149385.48  |
| 0.25 | 58259661.41    | 210308141.64    | 625734397.17    | 2185945353.73    | 0.66 | 4573.72   | 13992.15  | 37237.23   | 120069.90  |
| 0.26 | 42767903.87    | 155146474.45    | 450375862.20    | 1511785789.66    | 0.67 | 3700.51   | 11175.58  | 30061.45   | 93548.68   |
| 0.27 | 32100833.92    | 115554650.57    | 336402149.40    | 1131790425.36    | 0.68 | 3043.59   | 9124.75   | 24174.47   | 73485.03   |
| 0.28 | 24174468.25    | 86705458.16     | 253975762.63    | 831660458.14     | 0.69 | 2419.01   | 7393.39   | 19714.72   | 57654.54   |
| 0.29 | 18572210.09    | 66084568.26     | 189775458.86    | 612115613.43     | 0.70 | 1975.25   | 5903.17   | 15404.98   | 45786.81   |
| 0.30 | 13941001.36    | 50111593.37     | 144568573.61    | 461979961.17     | 0.71 | 1568.11   | 4618.74   | 11941.91   | 37068.28   |
| 0.31 | 10470923.27    | 38655566.69     | 108644238.93    | 355986986.30     | 0.72 | 1246.11   | 3634.97   | 9290.06    | 29103.65   |
| 0.32 | 8084771.94     | 29734204.82     | 85990896.86     | 270815460.24     | 0.73 | 999.92    | 2875.65   | 7343.49    | 21602.45   |
| 0.33 | 6296079.86     | 22627250.84     | 66809237.45     | 214745704.68     | 0.74 | 802.42    | 2256.05   | 5806.94    | 16930.16   |
| 0.34 | 4889812.42     | 17841447.89     | 53048161.10     | 163941259.02     | 0.75 | 633.81    | 1759.97   | 4572.14    | 13108.73   |
| 0.35 | 3767531.83     | 14007169.78     | 40715834.14     | 127598960.96     | 0.76 | 501.75    | 1346.79   | 3441.02    | 10137.22   |
| 0.36 | 2937340.66     | 10793609.25     | 31667147.51     | 99923944.07      | 0.77 | 396.43    | 1029.87   | 2703.89    | 7689.15    |
| 0.37 | 2319953.98     | 8437072.87      | 24683662.21     | 80063802.03      | 0.78 | 311.26    | 791.73    | 2014.02    | 5773.03    |
| 0.38 | 1800646.21     | 6450456.30      | 18634610.96     | 62491916.04      | 0.79 | 247.61    | 612.80    | 1508.44    | 4390.59    |
| 0.39 | 1399846.42     | 5028881.75      | 14605062.84     | 50031469.39      | 0.80 | 191.67    | 465.90    | 1156.59    | 3267.94    |
| 0.40 | 1105815.83     | 3975593.24      | 11486056.42     | 37926069.50      | 0.81 | 150.08    | 359.42    | 865.35     | 2468.04    |
| 0.41 | 869804.51      | 3140211.54      | 9280857.61      | 30685163.56      | 0.82 | 117.02    | 272.03    | 640.79     | 1808.91    |
| 0.42 | 689388.09      | 2482274.06      | 7286578.81      | 24006822.96      | 0.83 | 90.06     | 202.15    | 470.67     | 1311.85    |
| 0.43 | 545282.66      | 1996423.67      | 5655476.27      | 19148147.21      | 0.84 | 68.49     | 149.53    | 338.90     | 912.42     |
| 0.44 | 435793.49      | 1580371.56      | 4562154.54      | 15025093.59      | 0.85 | 51.58     | 109.80    | 246.00     | 646.22     |
| 0.45 | 348959.14      | 1242848.03      | 3658241.53      | 12065957.84      | 0.86 | 39.01     | 81.58     | 172.99     | 451.67     |
| 0.46 | 283420.75      | 1016626.88      | 2937020.71      | 9778890.02       | 0.87 | 29.20     | 58.35     | 123.65     | 312.24     |
| 0.47 | 232442.95      | 822102.91       | 2378044.43      | 7662677.02       | 0.88 | 21.47     | 41.76     | 86.88      | 210.98     |
| 0.48 | 188691.65      | 665331.65       | 1859786.55      | 6106662.42       | 0.89 | 15.55     | 29.27     | 58.88      | 142.35     |
| 0.49 | 152664.84      | 533316.27       | 1530002.93      | 4853364.72       | 0.90 | 11.15     | 20.49     | 38.50      | 93.76      |
| 0.50 | 125355.06      | 436719.62       | 1215605.14      | 3988529.62       |      |           |           |            |            |

Table S447: Critical values for detector  $\hat{H}_{mov,sn}^{m,0.2}$  with windows size  $n = 0.2$ , and IM-OLS estimation in a model with intercept and linear trend. The number of integrated regressors is 4 and the highest power of  $x_{kt}$  is 3.



| m    | 90 %          | 95 %           | 97,5 %         | 99 %            | m    | 90 %     | 95 %     | 97,5 %    | 99 %      |
|------|---------------|----------------|----------------|-----------------|------|----------|----------|-----------|-----------|
| 0.10 | 6831791623.67 | 23501299244.25 | 64967239853.89 | 209199141039.41 | 0.51 | 17712.80 | 56831.51 | 156867.21 | 454233.18 |
| 0.11 | 3649784701.86 | 12546920791.63 | 34982465846.85 | 107372933689.69 | 0.52 | 14423.73 | 45981.98 | 124459.51 | 361060.29 |
| 0.12 | 2011740310.04 | 6970152682.21  | 19586184742.90 | 60490664863.62  | 0.53 | 11779.34 | 37425.72 | 102462.80 | 301957.37 |
| 0.13 | 1184903118.12 | 4000725302.25  | 11099723402.82 | 34618321434.08  | 0.54 | 9718.05  | 30749.60 | 81668.99  | 240936.23 |
| 0.14 | 702646616.19  | 2362947230.64  | 6643012719.81  | 20652747948.39  | 0.55 | 7811.43  | 23940.93 | 64439.54  | 194823.08 |
| 0.15 | 427556869.34  | 1465247358.08  | 4248073826.66  | 13317029636.09  | 0.56 | 6392.39  | 19563.20 | 51578.98  | 154013.24 |
| 0.16 | 275186641.80  | 936062196.71   | 2641130129.38  | 8378918150.45   | 0.57 | 5251.49  | 15562.06 | 40503.78  | 123811.29 |
| 0.17 | 177939922.06  | 595882487.44   | 1664252384.37  | 5242604995.88   | 0.58 | 4263.38  | 12480.91 | 32166.99  | 98666.39  |
| 0.18 | 114648933.12  | 391384753.67   | 1097305210.08  | 3341216112.65   | 0.59 | 3469.69  | 10102.81 | 25864.03  | 78963.56  |
| 0.19 | 78526312.58   | 266384899.39   | 730349325.37   | 2336525145.69   | 0.60 | 2833.39  | 8174.78  | 20774.22  | 63644.86  |
| 0.20 | 54979843.56   | 187183630.99   | 507407878.71   | 1637133067.96   | 0.61 | 2311.91  | 6537.80  | 16766.47  | 49014.01  |
| 0.21 | 37924269.95   | 130897520.59   | 362381622.52   | 1134368524.72   | 0.62 | 1874.63  | 5314.03  | 13472.00  | 40448.27  |
| 0.22 | 27014506.95   | 92662190.24    | 256497570.39   | 801746869.70    | 0.63 | 1528.03  | 4229.23  | 10952.50  | 31934.87  |
| 0.23 | 19550950.88   | 66670979.42    | 186321173.38   | 567549984.56    | 0.64 | 1242.07  | 3356.10  | 8771.00   | 25157.90  |
| 0.24 | 14373240.60   | 48776498.80    | 135792369.61   | 401829696.57    | 0.65 | 1010.22  | 2778.80  | 6991.77   | 20543.83  |
| 0.25 | 10400089.45   | 35036621.33    | 99033156.56    | 298411685.23    | 0.66 | 827.55   | 2248.42  | 5705.51   | 16363.85  |
| 0.26 | 7701774.83    | 25988224.67    | 70884133.37    | 224886007.94    | 0.67 | 668.46   | 1783.67  | 4417.30   | 12989.27  |
| 0.27 | 5631951.56    | 19185906.61    | 52936027.91    | 163213471.55    | 0.68 | 547.69   | 1410.09  | 3537.91   | 10820.71  |
| 0.28 | 4169638.41    | 14509136.65    | 39546728.14    | 119580306.80    | 0.69 | 445.02   | 1140.94  | 2754.28   | 8088.61   |
| 0.29 | 3125274.47    | 10730100.66    | 30172322.22    | 93164751.85     | 0.70 | 358.11   | 911.72   | 2186.51   | 6401.71   |
| 0.30 | 2337224.91    | 8112828.98     | 22186667.64    | 66944488.09     | 0.71 | 287.10   | 723.95   | 1732.83   | 5083.62   |
| 0.31 | 1800874.39    | 6140747.40     | 17240764.84    | 52259156.59     | 0.72 | 230.68   | 572.95   | 1379.91   | 4023.79   |
| 0.32 | 1358655.11    | 4694111.20     | 13354931.08    | 40062385.63     | 0.73 | 187.56   | 454.33   | 1083.65   | 3000.11   |
| 0.33 | 1052578.24    | 3676756.52     | 10390670.40    | 30473136.40     | 0.74 | 151.05   | 358.87   | 840.98    | 2313.09   |
| 0.34 | 820044.19     | 2774114.80     | 7964997.03     | 23486114.02     | 0.75 | 121.20   | 282.31   | 654.37    | 1785.64   |
| 0.35 | 641663.73     | 2206005.28     | 6165524.36     | 18661990.93     | 0.76 | 97.01    | 224.33   | 511.95    | 1381.40   |
| 0.36 | 501582.29     | 1707422.09     | 4765756.18     | 14878342.91     | 0.77 | 76.81    | 171.47   | 389.85    | 1044.21   |
| 0.37 | 391932.72     | 1329892.08     | 3822334.11     | 11887182.31     | 0.78 | 60.48    | 131.54   | 296.37    | 788.80    |
| 0.38 | 310276.80     | 1054095.71     | 2924696.07     | 9005750.11      | 0.79 | 48.52    | 101.95   | 224.49    | 598.14    |
| 0.39 | 243244.02     | 838860.02      | 2296016.46     | 7072218.01      | 0.80 | 37.99    | 77.98    | 169.92    | 451.42    |
| 0.40 | 190213.15     | 659188.68      | 1838774.01     | 5657999.22      | 0.81 | 29.93    | 61.52    | 127.99    | 336.30    |
| 0.41 | 153035.41     | 522608.64      | 1452819.18     | 4337275.30      | 0.82 | 23.46    | 47.14    | 97.50     | 247.13    |
| 0.42 | 120826.28     | 406282.17      | 1125343.05     | 3486290.30      | 0.83 | 18.19    | 35.46    | 73.01     | 183.40    |
| 0.43 | 95608.13      | 324322.89      | 921164.20      | 2797832.69      | 0.84 | 14.09    | 26.62    | 52.58     | 128.30    |
| 0.44 | 76211.22      | 252624.84      | 716037.29      | 2152680.56      | 0.85 | 10.67    | 20.38    | 39.08     | 91.19     |
| 0.45 | 61952.37      | 203442.96      | 580166.29      | 1797998.85      | 0.86 | 8.16     | 15.02    | 27.74     | 61.71     |
| 0.46 | 50203.72      | 166777.72      | 464399.77      | 1389079.44      | 0.87 | 6.07     | 11.02    | 20.04     | 45.48     |
| 0.47 | 40594.10      | 133282.57      | 373700.38      | 1145685.88      | 0.88 | 4.50     | 7.82     | 14.00     | 30.91     |
| 0.48 | 32594.28      | 108312.07      | 303644.59      | 914784.63       | 0.89 | 3.33     | 5.63     | 9.63      | 20.11     |
| 0.49 | 26992.25      | 88917.28       | 238320.65      | 734857.94       | 0.90 | 2.48     | 4.07     | 6.69      | 13.40     |
| 0.50 | 21693.53      | 69580.12       | 192171.69      | 568769.38       |      |          |          |           |           |

Table S448: Critical values for detector  $\hat{H}_{mov,sn}^{m,0.3}$  with windows size  $n = 0.3$ , and FM-OLS and D-OLS estimation in a model with intercept and linear trend. The number of integrated regressors is 4 and the highest power of  $x_{kt}$  is 3.

| m    | 90 %           | 95 %            | 97.5 %          | 99 %             | m    | 90 %      | 95 %      | 97.5 %     | 99 %       |
|------|----------------|-----------------|-----------------|------------------|------|-----------|-----------|------------|------------|
| 0.10 | 46500125427.88 | 165297504797.62 | 489306310377.32 | 1695145442809.71 | 0.51 | 106707.31 | 369150.45 | 1048712.22 | 3376184.81 |
| 0.11 | 23899178370.55 | 87697544813.88  | 258445277668.97 | 845167966588.89  | 0.52 | 87757.75  | 301487.76 | 847082.70  | 2790521.62 |
| 0.12 | 13523402342.93 | 47577054923.97  | 146824590687.56 | 466071259685.78  | 0.53 | 70990.07  | 243332.82 | 693211.28  | 2168375.37 |
| 0.13 | 7726381392.22  | 27600608341.03  | 83816619067.02  | 287527503864.08  | 0.54 | 57354.39  | 193697.19 | 558535.51  | 1697872.75 |
| 0.14 | 4660212387.88  | 17128343192.65  | 50777286129.37  | 171250465435.75  | 0.55 | 47054.95  | 156764.72 | 445974.93  | 1409317.72 |
| 0.15 | 2813322778.13  | 10339269928.65  | 30730999883.89  | 105383490086.55  | 0.56 | 37833.58  | 126645.65 | 363692.72  | 1183876.78 |
| 0.16 | 1777612387.60  | 6484152820.25   | 19916074330.65  | 65630732990.66   | 0.57 | 30636.44  | 104520.75 | 294515.57  | 935665.20  |
| 0.17 | 1192564074.59  | 4282134286.83   | 12959824839.29  | 41729370449.00   | 0.58 | 24819.21  | 82997.18  | 232320.40  | 753703.54  |
| 0.18 | 777219331.14   | 2902105044.78   | 8295802171.53   | 27005195433.72   | 0.59 | 20116.62  | 67798.09  | 191729.30  | 586947.33  |
| 0.19 | 523606778.49   | 1963492004.67   | 5566697786.48   | 18551529447.45   | 0.60 | 16158.13  | 54244.23  | 155060.55  | 482446.57  |
| 0.20 | 359102140.97   | 1306973489.92   | 3878520511.41   | 13498872233.85   | 0.61 | 13059.01  | 43686.86  | 124492.52  | 392979.81  |
| 0.21 | 246155357.41   | 907493019.09    | 2767038399.90   | 9222903967.33    | 0.62 | 10695.38  | 34817.35  | 97354.89   | 307042.47  |
| 0.22 | 171970631.58   | 630003094.79    | 1892276869.67   | 6209629012.24    | 0.63 | 8699.02   | 27597.41  | 76589.66   | 246269.67  |
| 0.23 | 123372647.13   | 446798308.06    | 1343317086.02   | 4473289263.00    | 0.64 | 7121.64   | 22034.38  | 61948.36   | 192443.61  |
| 0.24 | 87848237.69    | 326216987.11    | 965275215.36    | 3385975515.95    | 0.65 | 5783.59   | 17695.82  | 48529.95   | 151473.45  |
| 0.25 | 63180494.55    | 229130014.88    | 682620083.44    | 2400629409.64    | 0.66 | 4679.61   | 14210.35  | 37872.22   | 120854.54  |
| 0.26 | 46127257.18    | 168869035.16    | 489678756.53    | 1669120486.06    | 0.67 | 3781.92   | 11311.08  | 30506.47   | 94299.68   |
| 0.27 | 34781748.55    | 125058687.56    | 368294244.65    | 1248801976.54    | 0.68 | 3092.49   | 9283.62   | 24310.17   | 74153.55   |
| 0.28 | 26150708.05    | 93749932.32     | 275157700.09    | 914651111.20     | 0.69 | 2455.34   | 7472.52   | 19927.50   | 58263.48   |
| 0.29 | 20080932.77    | 72114807.35     | 207367536.43    | 675531581.20     | 0.70 | 2004.75   | 5952.71   | 15517.20   | 46028.04   |
| 0.30 | 15095026.59    | 54337511.78     | 157236863.92    | 502768334.17     | 0.71 | 1585.99   | 4653.69   | 12038.22   | 37221.94   |
| 0.31 | 11348934.97    | 41635977.31     | 117997504.65    | 384840500.03     | 0.72 | 1258.46   | 3661.23   | 9329.40    | 29320.04   |
| 0.32 | 8704061.83     | 32190519.77     | 93135512.64     | 294382132.29     | 0.73 | 1006.82   | 2888.48   | 7354.31    | 21669.91   |
| 0.33 | 6786888.52     | 24416397.34     | 72349504.55     | 232199609.11     | 0.74 | 806.81    | 2264.69   | 5819.08    | 17040.69   |
| 0.34 | 5271882.70     | 19254968.00     | 57911883.72     | 178804005.96     | 0.75 | 635.87    | 1764.47   | 4577.55    | 13114.78   |
| 0.35 | 4041469.05     | 15131932.14     | 44086873.07     | 139134934.52     | 0.76 | 503.49    | 1349.03   | 3442.46    | 10140.07   |
| 0.36 | 3151648.28     | 11669151.01     | 33942452.71     | 107280470.52     | 0.77 | 397.21    | 1030.95   | 2704.81    | 7691.88    |
| 0.37 | 2488401.93     | 9112396.26      | 26776106.21     | 86198594.24      | 0.78 | 311.55    | 791.95    | 2014.51    | 5773.39    |
| 0.38 | 1927578.91     | 6950210.26      | 20027911.50     | 67299841.65      | 0.79 | 247.75    | 612.89    | 1508.93    | 4390.85    |
| 0.39 | 1502816.11     | 5393034.48      | 15631634.39     | 54293383.82      | 0.80 | 191.78    | 466.06    | 1156.72    | 3268.05    |
| 0.40 | 1184012.72     | 4282371.70      | 12349299.41     | 41010530.41      | 0.81 | 150.23    | 359.53    | 865.47     | 2468.12    |
| 0.41 | 930496.75      | 3363829.21      | 9946128.20      | 32892396.96      | 0.82 | 117.11    | 272.15    | 640.89     | 1809.00    |
| 0.42 | 739119.08      | 2646656.40      | 7820577.58      | 25687738.38      | 0.83 | 90.16     | 202.23    | 470.75     | 1311.91    |
| 0.43 | 581045.97      | 2136287.90      | 6053955.79      | 20365959.48      | 0.84 | 68.57     | 149.72    | 339.01     | 912.49     |
| 0.44 | 468357.17      | 1673953.38      | 4849159.18      | 15774939.19      | 0.85 | 51.69     | 109.86    | 246.14     | 646.32     |
| 0.45 | 371037.38      | 1323452.07      | 3891367.01      | 12813539.91      | 0.86 | 39.12     | 81.67     | 173.09     | 451.76     |
| 0.46 | 302691.00      | 1078655.90      | 3116435.58      | 10288834.87      | 0.87 | 29.33     | 58.48     | 123.71     | 312.37     |
| 0.47 | 247122.65      | 871834.29       | 2507219.65      | 8160432.00       | 0.88 | 21.58     | 41.85     | 86.98      | 211.06     |
| 0.48 | 200752.72      | 702492.08       | 1964951.37      | 6420864.58       | 0.89 | 15.67     | 29.40     | 58.97      | 142.47     |
| 0.49 | 162143.52      | 567315.50       | 1608695.01      | 5092447.64       | 0.90 | 11.26     | 20.61     | 38.64      | 93.92      |
| 0.50 | 132943.06      | 461081.38       | 1281891.13      | 4206595.70       |      |           |           |            |            |

Table S449: Critical values for detector  $\hat{H}_{mov,sn}^{m,0.3}$  with windows size  $n = 0.3$ , and IM-OLS estimation in a model with intercept and linear trend. The number of integrated regressors is 4 and the highest power of  $x_{kt}$  is 3.
